# Supplementary material for: Initial quantitative development of the Norse Feedback system: a novel clinical feedback system for routine mental healthcare
Source: Springer Nature journal article supplement (doi:10.1007/s11136-021-02825-1), 2021-04-13
Supplement: MOESM1 [file 19063164]

Supplement to: “Initial quantitative development of the Norse Feedback system: A novel adaptive multidimensional tool for use in routine mental healthcare.”

*Quality of Life Research*

Table of Contents

|                                                                         |    |
|-------------------------------------------------------------------------|----|
| Supplementary Table S1                                                  |    |
| DIF by sample (clinical v. nonclinical) in Study 2                      | 2  |
| Supplementary Table S2                                                  |    |
| DIF by gender in Study 2                                                | 6  |
| Supplementary Table S3                                                  |    |
| Standardized geomin rotated factor loadings from 12-factor EFA, Study 2 | 10 |
| Supplementary Table S4                                                  |    |
| DIF by sites in Study 3                                                 | 13 |
| Supplementary Table S5                                                  |    |
| DIF by age in Study 3                                                   | 16 |
| Supplementary Table S6                                                  |    |
| DIF by gender in Study 3                                                | 18 |
| Analysis supplement                                                     |    |
| Please use <a href="#">HTML version</a>                                 |    |

Supplementary Table S1. DIF by sample (clinical v. nonclinical) in Study 2

| Scale           | Item | Brief content                 | Uniform DIF: $\chi^2$<br>Model 1 v. 2 |                                     | Non-Uniform DIF:<br>$\chi^2$ Model 2 v. 3 |                                     | Total DIF: $\chi^2$ Model<br>1 v. 3 |                                     |
|-----------------|------|-------------------------------|---------------------------------------|-------------------------------------|-------------------------------------------|-------------------------------------|-------------------------------------|-------------------------------------|
|                 |      |                               | <i>p</i>                              | McFadden's<br><i>R</i> <sup>2</sup> | <i>p</i>                                  | McFadden's<br><i>R</i> <sup>2</sup> | <i>p</i>                            | McFadden's<br><i>R</i> <sup>2</sup> |
| Attachment      | 41   | Form strong connections       | <.0001                                | 0.0105                              | 0.0117                                    | 0.0013                              | <.0001                              | 0.0118                              |
| Attachment      | 1    | Care for others               | 0.0179                                | 0.0014                              | 0.0241                                    | 0.0013                              | 0.0048                              | 0.0028                              |
| Attachment      | 50   | Trusting                      | <.0001                                | 0.0214                              | 0.0633                                    | 0.0007                              | <.0001                              | 0.0221                              |
| Attachment      | 89   | Comfortable w/ emotions       | <.0001                                | 0.0049                              | 0.0627                                    | 0.0007                              | <.0001                              | 0.0055                              |
| Avoidance       | 78   | Avoid thoughts                | <.0001                                | 0.0436                              | 0.0001                                    | 0.0034                              | <.0001                              | 0.0470                              |
| Avoidance       | 8    | Avoid places                  | <.0001                                | 0.0067                              | 0.8427                                    | <.0001                              | <.0001                              | 0.0068                              |
| Avoidance       | 10   | Emotions help me              | <.0001                                | 0.0140                              | 0.8806                                    | <.0001                              | <.0001                              | 0.0140                              |
| Avoidance       | 17   | Afraid of things              | 0.0214                                | 0.0017                              | 0.0004                                    | 0.0041                              | 0.0001                              | 0.0058                              |
| Avoidance       | 34   | Avoid emotions                | <.0001                                | 0.0104                              | 0.0001                                    | 0.0031                              | <.0001                              | 0.0135                              |
| Avoidance       | 64   | Avoid people                  | <.0001                                | 0.0320                              | 0.8568                                    | <.0001                              | <.0001                              | 0.0320                              |
| Connectedness   | 43   | Comfortable w/ friends        | <.0001                                | 0.0056                              | 0.0006                                    | 0.0025                              | <.0001                              | 0.0081                              |
| Connectedness   | 45   | Sat. w/ sex life              | <.0001                                | 0.0106                              | 0.9808                                    | <.0001                              | <.0001                              | 0.0106                              |
| Connectedness   | 50   | Trusting                      | <.0001                                | 0.0414                              | 0.0019                                    | 0.0021                              | <.0001                              | 0.0435                              |
| Connectedness   | 54   | No control                    | <.0001                                | 0.1151                              | 0.0275                                    | 0.0013                              | <.0001                              | 0.1164                              |
| Connectedness   | 62   | Have friends                  | <.0001                                | 0.0186                              | 0.0012                                    | 0.0025                              | <.0001                              | 0.0211                              |
| Connectedness   | 69   | Feel alone                    | <.0001                                | 0.0723                              | 0.6404                                    | 0.0001                              | <.0001                              | 0.0724                              |
| Connectedness   | 80   | Have support                  | <.0001                                | 0.0210                              | <.0001                                    | 0.0073                              | <.0001                              | 0.0283                              |
| Demoralization  | 88   | Feel trapped                  | <.0001                                | 0.1453                              | <.0001                                    | 0.0044                              | <.0001                              | 0.1497                              |
| Demoralization  | 24   | Can't handle things           | <.0001                                | 0.0626                              | 0.0996                                    | 0.0006                              | <.0001                              | 0.0632                              |
| Demoralization  | 36   | Others don't understand       | <.0001                                | 0.0335                              | <.0001                                    | 0.0076                              | <.0001                              | 0.0411                              |
| Demoralization  | 42   | Feel depressed                | <.0001                                | 0.0984                              | 0.0001                                    | 0.0034                              | <.0001                              | 0.1018                              |
| Demoralization  | 61   | No hope                       | <.0001                                | 0.0239                              | 0.9601                                    | <.0001                              | <.0001                              | 0.0239                              |
| Eating problems | 63   | Control food                  | <.0001                                | 0.0187                              | 0.0278                                    | 0.0012                              | <.0001                              | 0.0199                              |
| Eating problems | 18   | Food planning                 | 0.7208                                | 0.0001                              | <.0001                                    | 0.0159                              | <.0001                              | 0.0160                              |
| Eating problems | 46   | Afraid lose control of eating | <.0001                                | 0.0066                              | 0.0189                                    | 0.0017                              | <.0001                              | 0.0083                              |
| Eating problems | 47   | Digestive problems            | <.0001                                | 0.0099                              | 0.0035                                    | 0.0019                              | <.0001                              | 0.0119                              |
| Eating problems | 57   | Eating prevents socializing   | 0.0001                                | 0.0086                              | 0.7931                                    | <.0001                              | 0.0003                              | 0.0087                              |

|                               |    |                               |        |        |        |        |        |        |
|-------------------------------|----|-------------------------------|--------|--------|--------|--------|--------|--------|
| Eating problems               | 86 | Body image discomfort         | <.0001 | 0.0179 | 0.0070 | 0.0014 | <.0001 | 0.0193 |
| Hypervigilance                | 2  | Spend energy ensuring safety  | 0.0002 | 0.0027 | 0.3568 | 0.0002 | 0.0007 | 0.0029 |
| Hypervigilance                | 7  | Prepared for worst            | 0.0011 | 0.0021 | 0.2490 | 0.0003 | 0.0025 | 0.0023 |
| Hypervigilance                | 9  | Feel safe at home             | <.0001 | 0.0145 | 0.0001 | 0.0050 | <.0001 | 0.0195 |
| Hypervigilance                | 50 | Trusting                      | <.0001 | 0.0051 | 0.4669 | 0.0001 | <.0001 | 0.0052 |
| Pressure from Negative Affect | 28 | Might cry uncontrollably      | <.0001 | 0.0331 | 0.0141 | 0.0015 | <.0001 | 0.0346 |
| Pressure from Negative Affect | 21 | Anger                         | <.0001 | 0.0057 | 0.8857 | <.0001 | <.0001 | 0.0057 |
| Pressure from Negative Affect | 30 | Health worry                  | <.0001 | 0.0045 | 0.1536 | 0.0005 | <.0001 | 0.0050 |
| Pressure from Negative Affect | 32 | Self-harm                     | <.0001 | 0.0243 | 0.0949 | 0.0026 | <.0001 | 0.0269 |
| Pressure from Negative Affect | 33 | Sleep well                    | <.0001 | 0.0047 | 0.6517 | <.0001 | <.0001 | 0.0048 |
| Pressure from Negative Affect | 42 | Feel depressed                | <.0001 | 0.1272 | 0.1544 | 0.0004 | <.0001 | 0.1277 |
| Pressure from Negative Affect | 51 | Restlessness                  | <.0001 | 0.1173 | 0.0503 | 0.0008 | <.0001 | 0.1181 |
| Pressure from Negative Affect | 60 | Feel down                     | <.0001 | 0.0715 | 0.0151 | 0.0012 | <.0001 | 0.0727 |
| Pressure from Negative Affect | 88 | Feel trapped                  | <.0001 | 0.1314 | 0.0069 | 0.0019 | <.0001 | 0.1333 |
| Perfectionism-Control         | 20 | Worry about carelessness      | 0.2801 | 0.0002 | 0.0180 | 0.0012 | 0.0341 | 0.0014 |
| Perfectionism-Control         | 26 | Doing things right interferes | 0.9059 | <.0001 | 0.8102 | <.0001 | 0.9648 | <.0001 |
| Perfectionism-Control         | 28 | Might cry uncontrollably      | <.0001 | 0.0193 | <.0001 | 0.0045 | <.0001 | 0.0238 |
| Perfectionism-Control         | 38 | Self-berate                   | <.0001 | 0.0100 | <.0001 | 0.0058 | <.0001 | 0.0158 |
| Perfectionism-Control         | 48 | Order compulsively            | 0.0179 | 0.0022 | 0.9653 | <.0001 | 0.0606 | 0.0022 |
| Perfectionism-Control         | 52 | Need control                  | 0.0406 | 0.0008 | 0.0954 | 0.0006 | 0.0306 | 0.0014 |
| Perfectionism-Control         | 68 | Don't let others control      | 0.0436 | 0.0008 | 0.5156 | 0.0001 | 0.1056 | 0.0009 |
| Relational distress           | 81 | Relationships cause stress    | <.0001 | 0.1177 | 0.0014 | 0.0022 | <.0001 | 0.1199 |
| Relational distress           | 25 | Affected by others' opinions  | <.0001 | 0.0183 | 0.0714 | 0.0006 | <.0001 | 0.0190 |
| Relational distress           | 36 | Others don't understand       | <.0001 | 0.0643 | 0.3496 | 0.0003 | <.0001 | 0.0646 |
| Relational distress           | 37 | Annoyed by others             | <.0001 | 0.0089 | 0.0203 | 0.0011 | <.0001 | 0.0101 |

|                                |    |                              |        |        |        |        |        |        |
|--------------------------------|----|------------------------------|--------|--------|--------|--------|--------|--------|
| Relational distress            | 65 | Many conflicts               | <.0001 | 0.0237 | 0.0070 | 0.0024 | <.0001 | 0.0262 |
| Relational distress            | 66 | Others cause conflicts       | <.0001 | 0.0209 | <.0001 | 0.0106 | <.0001 | 0.0315 |
| Relational distress            | 69 | Have friends                 | <.0001 | 0.0558 | 0.6452 | <.0001 | <.0001 | 0.0558 |
| Resilience and personal coping | 27 | Feel productive              | <.0001 | 0.0074 | 0.7361 | <.0001 | <.0001 | 0.0075 |
| Resilience and personal coping | 6  | Enjoy job/school             | <.0001 | 0.0128 | 0.1685 | 0.0006 | <.0001 | 0.0134 |
| Resilience and personal coping | 15 | Hope                         | <.0001 | 0.0124 | <.0001 | 0.0127 | <.0001 | 0.0251 |
| Resilience and personal coping | 22 | Can relax                    | <.0001 | 0.0197 | 0.6677 | <.0001 | <.0001 | 0.0197 |
| Resilience and personal coping | 33 | Sleep well                   | 0.0274 | 0.0012 | 0.7617 | <.0001 | 0.0838 | 0.0012 |
| Resilience and personal coping | 40 | Assertive                    | 0.9819 | <.0001 | 0.0198 | 0.0014 | 0.0661 | 0.0014 |
| Resilience and personal coping | 55 | Do things for pleasure       | 0.0031 | 0.0021 | <.0001 | 0.0041 | <.0001 | 0.0063 |
| Resilience and personal coping | 56 | Exercise is good             | 0.0179 | 0.0015 | 0.9940 | <.0001 | 0.0607 | 0.0015 |
| Resilience and personal coping | 67 | Like self                    | <.0001 | 0.0070 | 0.5486 | 0.0001 | <.0001 | 0.0071 |
| Resilience and personal coping | 70 | Not comfortable with support | <.0001 | 0.0140 | 0.0735 | 0.0008 | <.0001 | 0.0147 |
| Resilience and personal coping | 84 | Active for health            | 0.0310 | 0.0012 | 0.5760 | 0.0001 | 0.0835 | 0.0013 |
| Resilience and personal coping | 89 | Comfortable w/ emotions      | 0.0652 | 0.0009 | 0.6070 | 0.0001 | 0.1601 | 0.0009 |
| Hurtful Rumination             | 39 | Uncontrollable worries       | 0.4392 | 0.0001 | 0.7104 | <.0001 | 0.6920 | 0.0001 |
| Hurtful Rumination             | 3  | Physical tension             | 0.4665 | 0.0001 | 0.0877 | 0.0006 | 0.1786 | 0.0007 |
| Hurtful Rumination             | 38 | Self-berate                  | <.0001 | 0.0103 | 0.6195 | 0.0001 | <.0001 | 0.0103 |
| Hurtful Rumination             | 76 | Worthlessness                | 0.3878 | 0.0002 | 0.6394 | 0.0001 | 0.6171 | 0.0003 |
| Hurtful Rumination             | 85 | Need to ruminate less        | 0.3260 | 0.0002 | 0.0631 | 0.0007 | 0.1098 | 0.0009 |
| Social Role Functioning        | 87 | Important to community       | <.0001 | 0.0059 | 0.5205 | 0.0001 | <.0001 | 0.0060 |
| Social Role Functioning        | 5  | Value in community           | <.0001 | 0.0046 | 0.3929 | 0.0002 | 0.0001 | 0.0048 |
| Social Role Functioning        | 22 | Can relax                    | <.0001 | 0.0072 | 0.2994 | 0.0002 | <.0001 | 0.0074 |
| Social Role Functioning        | 27 | Feel productive              | <.0001 | 0.0039 | 0.7270 | <.0001 | 0.0002 | 0.0039 |
| Somatic Anxiety                | 3  | Physical tension             | <.0001 | 0.0688 | 0.5280 | 0.0001 | <.0001 | 0.0689 |
| Somatic Anxiety                | 30 | Health worry                 | <.0001 | 0.0201 | 0.4738 | 0.0001 | <.0001 | 0.0202 |

|                 |    |                             |        |        |        |        |        |        |
|-----------------|----|-----------------------------|--------|--------|--------|--------|--------|--------|
| Somatic Anxiety | 47 | Digestive problems          | <.0001 | 0.0103 | 0.6598 | <.0001 | <.0001 | 0.0103 |
| Somatic Anxiety | 51 | Restlessness                | <.0001 | 0.2311 | 0.0021 | 0.0019 | <.0001 | 0.2330 |
| Somatic Anxiety | 53 | Physical arousal            | <.0001 | 0.1363 | <.0001 | 0.0047 | <.0001 | 0.1410 |
| Somatic Anxiety | 75 | Fear without reason         | <.0001 | 0.2190 | 0.6639 | <.0001 | <.0001 | 0.2190 |
| Substance Use   | 35 | Concerned dependent         | 0.0002 | 0.0089 | 0.0079 | 0.0044 | <.0001 | 0.0133 |
| Substance Use   | 4  | Use interferes              | 0.0024 | 0.0066 | 0.0106 | 0.0047 | 0.0004 | 0.0113 |
| Substance Use   | 16 | Others mentioned use        | 0.0043 | 0.0062 | 0.5304 | 0.0003 | 0.0140 | 0.0065 |
| Substance Use   | 59 | Think should reduce use     | 0.0045 | 0.0041 | 0.2518 | 0.0007 | 0.0092 | 0.0047 |
| Suicide risk    | 44 | Thoughts of suicide         | 0.1851 | 0.0006 | 0.1666 | 0.0006 | 0.1597 | 0.0012 |
| Suicide risk    | 19 | Better if dead              | 0.0384 | 0.0016 | 0.1734 | 0.0007 | 0.0464 | 0.0023 |
| Suicide risk    | 77 | Scared of impulsive suicide | 0.4118 | 0.0003 | 0.6103 | 0.0001 | 0.6271 | 0.0005 |
| Suicide risk    | 79 | Plans for suicide           | 0.0529 | 0.0025 | 0.3444 | 0.0006 | 0.0982 | 0.0030 |

Note. Rows where McFadden's  $R^2 < .02$  are presented in gray text for clarity.

Supplementary Table S2. DIF by gender in Study 2

| Scale           | Item | Uniform DIF: $\chi^2$<br>Model 1 v. 2 |                     | Total DIF: $\chi^2$ Model<br>1 v. 3 |                     | Non-Uniform DIF:<br>$\chi^2$ Model 2 v. 3 |                     |
|-----------------|------|---------------------------------------|---------------------|-------------------------------------|---------------------|-------------------------------------------|---------------------|
|                 |      | <i>p</i>                              | McFadden's<br>$R^2$ | <i>p</i>                            | McFadden's<br>$R^2$ | <i>p</i>                                  | McFadden's<br>$R^2$ |
| Attachment      | 41   | 0.041                                 | 0.0008              | 0.114                               | 0.0009              | 0.695                                     | <.0001              |
| Attachment      | 1    | <.001                                 | 0.0178              | <.001                               | 0.0178              | 0.884                                     | <.0001              |
| Attachment      | 50   | 0.070                                 | 0.0006              | <.001                               | 0.0081              | <.001                                     | 0.0075              |
| Attachment      | 89   | 0.590                                 | 0.0001              | 0.736                               | 0.0001              | 0.569                                     | 0.0001              |
| Avoidance       | 78   | 0.535                                 | 0.0001              | 0.821                               | 0.0001              | 0.920                                     | <.0001              |
| Avoidance       | 8    | 0.234                                 | 0.0003              | 0.439                               | 0.0004              | 0.628                                     | 0.0001              |
| Avoidance       | 10   | 0.072                                 | 0.0007              | 0.132                               | 0.0009              | 0.366                                     | 0.0002              |
| Avoidance       | 17   | 0.004                                 | 0.0027              | 0.016                               | 0.0027              | 0.939                                     | <.0001              |
| Avoidance       | 34   | 0.031                                 | 0.0010              | <.001                               | 0.0032              | 0.001                                     | 0.0022              |
| Avoidance       | 64   | 0.000                                 | 0.0034              | 0.000                               | 0.0043              | 0.064                                     | 0.0008              |
| Connectedness   | 43   | 0.048                                 | 0.0008              | 0.064                               | 0.0012              | 0.204                                     | 0.0003              |
| Connectedness   | 45   | 0.000                                 | 0.0030              | <.001                               | 0.0053              | 0.001                                     | 0.0023              |
| Connectedness   | 50   | 0.085                                 | 0.0006              | 0.077                               | 0.0011              | 0.143                                     | 0.0005              |
| Connectedness   | 54   | 0.240                                 | 0.0004              | 0.296                               | 0.0007              | 0.304                                     | 0.0003              |
| Connectedness   | 62   | <.001                                 | 0.0072              | <.001                               | 0.0082              | 0.045                                     | 0.0010              |
| Connectedness   | 69   | 0.621                                 | 0.0001              | 0.871                               | 0.0001              | 0.858                                     | <.0001              |
| Connectedness   | 80   | <.001                                 | 0.0052              | <.001                               | 0.0052              | 0.763                                     | <.0001              |
| Demoralization  | 88   | 0.857                                 | <.0001              | 0.963                               | <.0001              | 0.834                                     | <.0001              |
| Demoralization  | 24   | <.001                                 | 0.0077              | <.001                               | 0.0077              | 0.758                                     | <.0001              |
| Demoralization  | 36   | 0.888                                 | <.0001              | 0.792                               | 0.0001              | 0.504                                     | 0.0001              |
| Demoralization  | 42   | 0.345                                 | 0.0002              | 0.585                               | 0.0002              | 0.670                                     | <.0001              |
| Demoralization  | 61   | 0.056                                 | 0.0010              | 0.101                               | 0.0013              | 0.332                                     | 0.0003              |
| Eating problems | 63   | 0.135                                 | 0.0005              | 0.265                               | 0.0007              | 0.516                                     | 0.0001              |
| Eating problems | 18   | 0.018                                 | 0.0024              | 0.041                               | 0.0027              | 0.370                                     | 0.0003              |

|                               |    |       |        |       |        |       |        |
|-------------------------------|----|-------|--------|-------|--------|-------|--------|
| Eating problems               | 46 | 0.983 | <.0001 | 0.940 | <.0001 | 0.724 | <.0001 |
| Eating problems               | 47 | 0.733 | <.0001 | 0.757 | 0.0001 | 0.508 | 0.0001 |
| Eating problems               | 57 | 0.002 | 0.0054 | <.001 | 0.0094 | 0.009 | 0.0040 |
| Eating problems               | 86 | 0.001 | 0.0022 | <.001 | 0.0039 | 0.003 | 0.0017 |
| Hypervigilance                | 2  | 0.244 | 0.0003 | 0.085 | 0.0010 | 0.059 | 0.0007 |
| Hypervigilance                | 7  | 0.635 | <.0001 | 0.548 | 0.0002 | 0.322 | 0.0002 |
| Hypervigilance                | 9  | 0.018 | 0.0018 | 0.053 | 0.0019 | 0.573 | 0.0001 |
| Hypervigilance                | 50 | 0.613 | <.0001 | 0.038 | 0.0013 | 0.012 | 0.0012 |
| Pressure from Negative Affect | 28 | <.001 | 0.0151 | <.001 | 0.0152 | 0.493 | 0.0001 |
| Pressure from Negative Affect | 21 | 0.805 | <.0001 | 0.792 | 0.0001 | 0.524 | 0.0001 |
| Pressure from Negative Affect | 30 | 0.608 | 0.0001 | 0.845 | 0.0001 | 0.784 | <.0001 |
| Pressure from Negative Affect | 32 | 0.714 | 0.0001 | 0.610 | 0.0009 | 0.356 | 0.0008 |
| Pressure from Negative Affect | 33 | 0.163 | 0.0004 | 0.194 | 0.0006 | 0.248 | 0.0003 |
| Pressure from Negative Affect | 42 | 0.740 | <.0001 | 0.859 | 0.0001 | 0.659 | <.0001 |
| Pressure from Negative Affect | 51 | 0.682 | <.0001 | 0.148 | 0.0008 | 0.056 | 0.0008 |
| Pressure from Negative Affect | 60 | 0.771 | <.0001 | 0.414 | 0.0004 | 0.195 | 0.0003 |
| Pressure from Negative Affect | 88 | 0.280 | 0.0003 | 0.358 | 0.0005 | 0.347 | 0.0002 |
| Perfectionism-Control         | 20 | 0.177 | 0.0004 | 0.395 | 0.0004 | 0.849 | <.0001 |
| Perfectionism-Control         | 26 | <.001 | 0.0040 | <.001 | 0.0041 | 0.640 | <.0001 |
| Perfectionism-Control         | 28 | <.001 | 0.0094 | <.001 | 0.0098 | 0.208 | 0.0004 |
| Perfectionism-Control         | 38 | 0.588 | 0.0001 | 0.282 | 0.0006 | 0.134 | 0.0005 |
| Perfectionism-Control         | 48 | 0.032 | 0.0018 | 0.079 | 0.0020 | 0.479 | 0.0002 |

|                                |    |       |        |       |        |       |        |
|--------------------------------|----|-------|--------|-------|--------|-------|--------|
| Perfectionism-Control          | 52 | 0.150 | 0.0004 | 0.199 | 0.0006 | 0.281 | 0.0002 |
| Perfectionism-Control          | 68 | 0.031 | 0.0009 | 0.097 | 0.0009 | 0.946 | <.0001 |
| Relational distress            | 81 | 0.371 | 0.0002 | 0.665 | 0.0002 | 0.898 | <.0001 |
| Relational distress            | 25 | <.001 | 0.0035 | <.001 | 0.0039 | 0.150 | 0.0004 |
| Relational distress            | 36 | 0.950 | <.0001 | 0.997 | <.0001 | 0.962 | <.0001 |
| Relational distress            | 37 | 0.284 | 0.0002 | 0.558 | 0.0002 | 0.889 | <.0001 |
| Relational distress            | 65 | 0.257 | 0.0004 | 0.494 | 0.0004 | 0.727 | <.0001 |
| Relational distress            | 66 | <.001 | 0.0085 | <.001 | 0.0086 | 0.564 | 0.0001 |
| Relational distress            | 69 | 0.805 | <.0001 | 0.086 | 0.0011 | 0.028 | 0.0010 |
| Resilience and personal coping | 27 | 0.444 | 0.0001 | 0.675 | 0.0002 | 0.654 | 0.0001 |
| Resilience and personal coping | 6  | <.001 | 0.0050 | <.001 | 0.0052 | 0.456 | 0.0002 |
| Resilience and personal coping | 15 | 0.014 | 0.0015 | 0.036 | 0.0017 | 0.444 | 0.0001 |
| Resilience and personal coping | 22 | 0.132 | 0.0006 | 0.113 | 0.0011 | 0.147 | 0.0005 |
| Resilience and personal coping | 33 | 0.351 | 0.0002 | 0.455 | 0.0004 | 0.401 | 0.0002 |
| Resilience and personal coping | 40 | 0.325 | 0.0002 | 0.575 | 0.0003 | 0.713 | <.0001 |
| Resilience and personal coping | 55 | 0.057 | 0.0009 | 0.001 | 0.0036 | 0.001 | 0.0027 |
| Resilience and personal coping | 56 | 0.834 | <.0001 | 0.006 | 0.0027 | 0.001 | 0.0027 |
| Resilience and personal coping | 67 | 0.570 | 0.0001 | 0.568 | 0.0003 | 0.369 | 0.0002 |
| Resilience and personal coping | 70 | 0.071 | 0.0008 | 0.190 | 0.0008 | 0.809 | <.0001 |
| Resilience and personal coping | 84 | 0.026 | 0.0013 | 0.030 | 0.0018 | 0.153 | 0.0005 |



|                                |    |       |        |       |        |       |        |
|--------------------------------|----|-------|--------|-------|--------|-------|--------|
| Resilience and personal coping | 89 | 0.944 | <.0001 | 0.988 | <.0001 | 0.887 | <.0001 |
| Hurtful Rumination             | 39 | 0.652 | <.0001 | 0.600 | 0.0002 | 0.366 | 0.0002 |
| Hurtful Rumination             | 3  | <.001 | 0.0050 | <.001 | 0.0050 | 0.739 | <.0001 |
| Hurtful Rumination             | 38 | 0.297 | 0.0002 | 0.195 | 0.0007 | 0.139 | 0.0005 |
| Hurtful Rumination             | 76 | 0.612 | 0.0001 | 0.447 | 0.0005 | 0.244 | 0.0004 |
| Hurtful Rumination             | 85 | 0.000 | 0.0025 | 0.001 | 0.0027 | 0.323 | 0.0002 |
| Social Role Functioning        | 87 | 0.176 | 0.0005 | 0.391 | 0.0005 | 0.841 | <.0001 |
| Social Role Functioning        | 5  | 0.993 | <.0001 | 0.912 | <.0001 | 0.668 | <.0001 |
| Social Role Functioning        | 22 | 0.023 | 0.0012 | 0.025 | 0.0017 | 0.136 | 0.0005 |
| Social Role Functioning        | 27 | 0.455 | 0.0001 | 0.708 | 0.0002 | 0.717 | <.0001 |
| Somatic Anxiety                | 3  | <.001 | 0.0057 | <.001 | 0.0059 | 0.285 | 0.0002 |
| Somatic Anxiety                | 30 | 0.292 | 0.0002 | 0.544 | 0.0003 | 0.740 | <.0001 |
| Somatic Anxiety                | 47 | 0.036 | 0.0010 | 0.054 | 0.0013 | 0.232 | 0.0003 |
| Somatic Anxiety                | 51 | <.001 | 0.0039 | <.001 | 0.0051 | 0.018 | 0.0011 |
| Somatic Anxiety                | 53 | 0.885 | <.0001 | 0.557 | 0.0003 | 0.284 | 0.0003 |
| Somatic Anxiety                | 75 | 0.685 | <.0001 | 0.713 | 0.0001 | 0.474 | 0.0001 |
| Substance Use                  | 35 | 0.066 | 0.0018 | 0.184 | 0.0018 | 0.958 | <.0001 |
| Substance Use                  | 4  | 0.481 | 0.0004 | 0.753 | 0.0004 | 0.790 | 0.0001 |
| Substance Use                  | 16 | 0.044 | 0.0028 | 0.087 | 0.0034 | 0.363 | 0.0006 |
| Substance Use                  | 59 | 0.474 | 0.0003 | 0.682 | 0.0004 | 0.616 | 0.0001 |
| Suicide risk                   | 44 | 0.122 | 0.0008 | 0.079 | 0.0016 | 0.102 | 0.0009 |
| Suicide risk                   | 19 | 0.042 | 0.0015 | 0.087 | 0.0017 | 0.389 | 0.0003 |
| Suicide risk                   | 77 | 0.769 | <.0001 | 0.894 | 0.0001 | 0.711 | 0.0001 |
| Suicide risk                   | 79 | 0.391 | 0.0004 | 0.689 | 0.0004 | 0.927 | <.0001 |

Note. Rows where McFadden's  $R^2 < .02$  are presented in gray text for clarity. That is all rows in this analysis.

Supplemental Table S3. Standardized geomin rotated factor loadings from 12-factor EFA, Study 2.

| Item | Assigned Scale                 | 1           | 2            | 3           | 4           | 5           | 6            | 7            | 8           | 9           | 10           | 11           | 12           |
|------|--------------------------------|-------------|--------------|-------------|-------------|-------------|--------------|--------------|-------------|-------------|--------------|--------------|--------------|
| 20   | Perfectionism-Control          | <b>0.77</b> | 0.13         | -0.02       | 0.10        | -0.03       | 0.05         | -0.08        | -0.04       | 0.09        | -0.08        | 0.04         | -0.01        |
| 23   | Emotional Distancing           | <b>0.77</b> | 0.11         | 0.04        | 0.00        | 0.11        | -0.06        | -0.16        | -0.02       | 0.08        | -0.04        | -0.01        | 0.02         |
| 39   | Hurtful Rumination             | <b>0.74</b> | -0.23        | 0.10        | -0.05       | 0.02        | -0.10        | <b>0.23</b>  | 0.01        | -0.05       | 0.02         | -0.05        | -0.11        |
| 3    | Hurtful Rumination             | <b>0.69</b> | 0.11         | -0.08       | -0.06       | -0.04       | 0.08         | -0.03        | -0.02       | 0.00        | -0.03        | 0.03         | <b>-0.39</b> |
| 2    | Hypervigilance                 | <b>0.66</b> | 0.18         | -0.05       | 0.00        | -0.06       | 0.03         | -0.01        | <b>0.21</b> | <b>0.27</b> | -0.03        | 0.06         | 0.07         |
| 51   | Pressure from Negative Affect  | <b>0.65</b> | -0.30        | 0.01        | 0.00        | 0.07        | -0.03        | <b>0.27</b>  | 0.00        | -0.03       | 0.03         | -0.06        | -0.17        |
| 78   | Avoidance                      | <b>0.61</b> | -0.12        | 0.01        | 0.07        | 0.01        | 0.09         | -0.02        | -0.03       | -0.01       | -0.01        | -0.05        | 0.10         |
| 31   | Emotional Distancing           | <b>0.60</b> | -0.09        | 0.06        | 0.04        | 0.04        | -0.04        | <b>-0.31</b> | <b>0.21</b> | -0.01       | -0.19        | 0.12         | 0.12         |
| 7    | Hypervigilance                 | <b>0.56</b> | 0.09         | -0.08       | -0.02       | 0.01        | <b>0.21</b>  | -0.07        | 0.01        | 0.14        | 0.08         | 0.15         | -0.02        |
| 81   | Relational distress            | <b>0.51</b> | -0.06        | -0.07       | -0.10       | 0.02        | <b>-0.25</b> | 0.03         | 0.02        | <b>0.27</b> | <b>0.31</b>  | -0.02        | 0.09         |
| 8    | Avoidance                      | <b>0.47</b> | -0.03        | 0.02        | -0.01       | -0.04       | -0.07        | -0.02        | 0.15        | <b>0.25</b> | 0.08         | -0.19        | <b>0.22</b>  |
| 34   | Avoidance                      | <b>0.45</b> | -0.01        | 0.03        | 0.01        | 0.00        | <b>0.21</b>  | 0.02         | -0.04       | <b>0.31</b> | <b>0.21</b>  | 0.02         | -0.03        |
| 58   | Psychosis                      | <b>0.44</b> | 0.24         | 0.09        | 0.15        | 0.05        | 0.01         | <b>-0.31</b> | 0.16        | -0.10       | 0.01         | -0.14        | -0.01        |
| 75   | Somatic Anxiety                | <b>0.42</b> | -0.27        | 0.08        | 0.01        | -0.06       | 0.10         | 0.17         | <b>0.21</b> | 0.14        | -0.01        | -0.09        | -0.10        |
| 85   | Hurtful Rumination             | <b>0.40</b> | 0.04         | -0.18       | 0.08        | -0.06       | -0.01        | <b>0.22</b>  | 0.09        | 0.11        | -0.01        | <b>-0.23</b> | <b>-0.21</b> |
| 88   | Demoralization                 | 0.39        | -0.18        | -0.01       | 0.06        | <b>0.25</b> | -0.15        | <b>0.25</b>  | 0.05        | 0.02        | 0.09         | -0.04        | <b>-0.27</b> |
| 64   | Avoidance                      | 0.37        | -0.25        | 0.03        | -0.07       | 0.07        | -0.12        | -0.02        | 0.05        | <b>0.31</b> | <b>0.27</b>  | 0.03         | <b>0.22</b>  |
| 25   | Relational distress            | 0.37        | -0.04        | -0.01       | <b>0.21</b> | 0.03        | <b>0.22</b>  | 0.12         | 0.05        | -0.10       | 0.12         | <b>-0.28</b> | 0.18         |
| 53   | Somatic Anxiety                | 0.37        | -0.01        | 0.03        | -0.10       | 0.09        | -0.05        | 0.05         | <b>0.32</b> | <b>0.35</b> | -0.02        | 0.03         | <b>-0.34</b> |
| 38   | Hurtful Rumination             | 0.35        | -0.20        | -0.03       | <b>0.25</b> | 0.07        | 0.05         | -0.03        | 0.02        | -0.03       | <b>0.25</b>  | -0.07        | 0.07         |
| 54   | Connectedness                  | 0.31        | -0.21        | 0.04        | 0.04        | 0.17        | 0.14         | -0.03        | <b>0.26</b> | 0.19        | 0.00         | 0.08         | -0.12        |
| 6    | Resilience and personal coping | -0.12       | <b>0.79</b>  | 0.16        | 0.10        | 0.17        | 0.11         | <b>0.22</b>  | -0.04       | -0.03       | 0.03         | 0.01         | -0.03        |
| 27   | Resilience and personal coping | 0.01        | <b>0.70</b>  | 0.13        | -0.01       | 0.01        | -0.06        | <b>0.30</b>  | -0.11       | -0.07       | 0.06         | -0.10        | -0.01        |
| 15   | Resilience and personal coping | 0.14        | <b>0.53</b>  | 0.16        | -0.09       | -0.19       | 0.16         | 0.07         | 0.05        | 0.01        | -0.04        | 0.10         | 0.13         |
| 42   | Demoralization                 | 0.36        | <b>-0.52</b> | -0.02       | -0.08       | <b>0.27</b> | 0.04         | <b>0.21</b>  | -0.01       | -0.12       | 0.08         | 0.01         | -0.08        |
| 60   | Pressure from Negative Affect  | -0.25       | <b>0.49</b>  | -0.04       | 0.09        | -0.20       | -0.08        | 0.02         | 0.15        | 0.00        | 0.00         | 0.17         | 0.12         |
| 69   | Connectedness                  | 0.33        | -0.35        | 0.06        | 0.07        | 0.10        | 0.06         | -0.01        | -0.08       | 0.14        | 0.19         | -0.06        | -0.01        |
| 62   | Connectedness                  | 0.07        | 0.33         | -0.01       | -0.03       | 0.00        | 0.10         | -0.02        | 0.03        | -0.12       | <b>-0.24</b> | <b>0.23</b>  | -0.06        |
| 59   | Substance Use                  | -0.03       | 0.00         | <b>0.96</b> | 0.01        | -0.09       | -0.03        | -0.01        | -0.07       | <b>0.23</b> | 0.02         | -0.03        | 0.01         |
| 35   | Substance Use                  | 0.16        | 0.04         | <b>0.95</b> | -0.01       | 0.00        | -0.08        | 0.01         | 0.06        | -0.01       | -0.02        | -0.12        | -0.06        |
| 4    | Substance Use                  | 0.02        | 0.00         | <b>0.95</b> | 0.06        | 0.11        | 0.03         | 0.02         | 0.02        | -0.05       | -0.03        | -0.01        | 0.00         |
| 16   | Substance Use                  | 0.02        | -0.01        | <b>0.91</b> | -0.03       | 0.02        | 0.02         | -0.08        | 0.01        | <b>0.21</b> | 0.02         | 0.07         | 0.03         |
| 18   | Eating problems                | 0.03        | 0.08         | 0.07        | <b>0.97</b> | -0.02       | -0.03        | -0.07        | -0.04       | 0.03        | 0.02         | 0.02         | -0.06        |
| 46   | Eating problems                | 0.04        | 0.00         | 0.00        | <b>0.86</b> | -0.10       | 0.15         | -0.15        | 0.01        | -0.03       | 0.05         | -0.04        | -0.07        |
| 57   | Eating problems                | -0.18       | -0.06        | 0.05        | <b>0.85</b> | <b>0.22</b> | -0.11        | -0.02        | 0.09        | 0.03        | -0.09        | -0.05        | 0.00         |
| 63   | Eating problems                | 0.00        | 0.04         | -0.01       | <b>0.82</b> | 0.05        | 0.02         | 0.03         | 0.00        | -0.01       | 0.15         | <b>0.24</b>  | -0.01        |
| 86   | Eating problems                | 0.04        | 0.04         | -0.18       | 0.37        | 0.21        | <b>0.30</b>  | 0.03         | 0.06        | 0.19        | -0.06        | <b>-0.25</b> | 0.00         |
| 26   | Perfectionism-Control          | 0.29        | -0.22        | -0.06       | 0.32        | 0.00        | 0.00         | 0.07         | 0.16        | -0.04       | -0.01        | 0.06         | 0.08         |
| 44   | Suicide risk                   | 0.01        | 0.02         | 0.07        | -0.07       | <b>0.90</b> | 0.03         | 0.13         | -0.05       | 0.07        | -0.02        | 0.04         | 0.01         |
| 79   | Suicide risk                   | -0.01       | 0.03         | -0.11       | -0.10       | <b>0.84</b> | -0.11        | <b>-0.32</b> | 0.10        | -0.02       | -0.02        | 0.01         | -0.04        |

|    |                                |             |              |       |              |              |              |              |              |              |              |             |              |
|----|--------------------------------|-------------|--------------|-------|--------------|--------------|--------------|--------------|--------------|--------------|--------------|-------------|--------------|
| 19 | Suicide risk                   | 0.08        | -0.05        | 0.00  | 0.02         | <b>0.84</b>  | 0.02         | -0.05        | -0.17        | -0.05        | 0.12         | -0.01       | 0.01         |
| 77 | Suicide risk                   | -0.05       | -0.03        | 0.07  | -0.10        | <b>0.78</b>  | 0.02         | -0.14        | 0.01         | 0.02         | 0.10         | -0.04       | 0.00         |
| 76 | Hurtful Rumination             | 0.19        | <b>-0.28</b> | -0.07 | 0.13         | <b>0.60</b>  | 0.04         | -0.03        | -0.01        | 0.01         | -0.01        | -0.05       | 0.11         |
| 61 | Demoralization                 | 0.09        | <b>-0.45</b> | 0.07  | 0.08         | <b>0.52</b>  | -0.08        | -0.01        | 0.00         | 0.03         | -0.01        | 0.09        | -0.02        |
| 32 | Pressure from Negative Affect  | -0.03       | -0.02        | -0.03 | 0.20         | <b>0.49</b>  | 0.02         | -0.20        | 0.22         | 0.00         | 0.07         | -0.08       | -0.02        |
| 24 | Demoralization                 | 0.17        | <b>-0.29</b> | 0.01  | -0.02        | <b>0.40</b>  | 0.14         | 0.09         | 0.07         | -0.01        | 0.09         | -0.03       | <b>-0.27</b> |
| 49 | Psychosis                      | 0.13        | 0.04         | 0.04  | 0.08         | <b>0.32</b>  | <b>-0.27</b> | -0.15        | -0.01        | 0.02         | <b>0.26</b>  | 0.14        | 0.03         |
| 1  | Attachment                     | 0.02        | 0.02         | -0.04 | -0.08        | <b>-0.02</b> | <b>0.57</b>  | 0.31         | 0.01         | 0.09         | -0.14        | 0.21        | 0.06         |
| 28 | Perfectionism-Control          | <b>0.37</b> | -0.01        | -0.06 | 0.11         | 0.10         | 0.37         | 0.02         | <b>-0.21</b> | -0.05        | 0.19         | -0.12       | -0.03        |
| 87 | Social Role Functioning        | -0.05       | 0.07         | 0.16  | -0.02        | <b>-0.31</b> | 0.02         | <b>0.46</b>  | 0.07         | -0.05        | -0.12        | 0.15        | -0.01        |
| 5  | Social Role Functioning        | -0.06       | 0.10         | 0.25  | -0.11        | <b>-0.33</b> | 0.07         | <b>0.46</b>  | 0.07         | -0.02        | <b>-0.25</b> | 0.12        | 0.01         |
| 56 | Resilience and personal coping | 0.03        | -0.05        | -0.02 | 0.38         | -0.05        | <b>-0.34</b> | <b>0.42</b>  | -0.05        | 0.04         | 0.02         | <b>0.40</b> | 0.01         |
| 10 | Avoidance                      | -0.02       | 0.16         | 0.01  | -0.15        | 0.05         | 0.02         | <b>0.38</b>  | 0.07         | -0.06        | -0.12        | 0.26        | 0.12         |
| 9  | Hypervigilance                 | -0.01       | -0.07        | 0.00  | 0.05         | -0.16        | 0.14         | <b>0.28</b>  | -0.15        | 0.03         | <b>-0.23</b> | 0.26        | 0.07         |
| 17 | Avoidance                      | 0.10        | -0.18        | 0.07  | -0.06        | -0.04        | 0.17         | -0.03        | <b>0.59</b>  | 0.07         | 0.08         | -0.12       | 0.14         |
| 29 | Psychosis                      | 0.03        | 0.08         | 0.14  | 0.01         | <b>0.23</b>  | 0.00         | <b>-0.48</b> | <b>0.50</b>  | -0.06        | 0.07         | -0.01       | 0.04         |
| 30 | Pressure from Negative Affect  | 0.09        | -0.13        | 0.00  | 0.10         | -0.09        | 0.38         | -0.02        | <b>0.44</b>  | -0.07        | 0.03         | 0.02        | -0.20        |
| 48 | Perfectionism-Control          | <b>0.31</b> | -0.01        | -0.05 | 0.17         | 0.08         | -0.12        | 0.02         | <b>0.41</b>  | -0.10        | -0.01        | -0.02       | 0.01         |
| 52 | Perfectionism-Control          | 0.12        | 0.13         | -0.17 | 0.22         | 0.19         | -0.03        | 0.27         | 0.38         | 0.21         | -0.05        | -0.01       | 0.04         |
| 83 | Independent                    | -0.01       | -0.08        | -0.01 | 0.01         | -0.15        | -0.14        | <b>0.29</b>  | <b>0.32</b>  | -0.07        | 0.23         | -0.05       | -0.03        |
| 43 | Connectedness                  | 0.02        | 0.16         | -0.01 | -0.13        | 0.03         | 0.02         | 0.15         | 0.05         | <b>-0.54</b> | -0.06        | 0.28        | 0.00         |
| 50 | Attachment                     | 0.04        | 0.06         | 0.19  | 0.06         | -0.07        | -0.01        | 0.21         | 0.05         | <b>-0.47</b> | <b>-0.29</b> | 0.05        | 0.12         |
| 68 | Perfectionism-Control          | 0.02        | 0.10         | -0.14 | 0.18         | -0.09        | 0.07         | 0.18         | 0.20         | <b>0.47</b>  | 0.21         | -0.02       | -0.03        |
| 41 | Attachment                     | 0.00        | 0.03         | -0.01 | 0.01         | -0.02        | <b>0.41</b>  | 0.33         | -0.09        | <b>-0.46</b> | 0.06         | 0.05        | 0.04         |
| 70 | Resilience and personal coping | 0.14        | -0.19        | 0.00  | 0.08         | 0.03         | 0.18         | 0.13         | -0.10        | <b>0.42</b>  | 0.27         | 0.02        | -0.01        |
| 65 | Relational distress            | -0.06       | 0.00         | 0.01  | 0.07         | 0.00         | -0.05        | 0.01         | 0.11         | -0.03        | <b>0.75</b>  | 0.14        | -0.08        |
| 37 | Relational distress            | 0.07        | 0.00         | -0.02 | -0.02        | -0.06        | 0.00         | -0.05        | 0.15         | -0.06        | <b>0.63</b>  | -0.18       | -0.03        |
| 36 | Demoralization                 | <b>0.27</b> | -0.04        | 0.16  | 0.16         | -0.03        | 0.12         | <b>-0.27</b> | -0.01        | 0.06         | <b>0.51</b>  | 0.04        | 0.01         |
| 66 | Relational distress            | 0.07        | 0.17         | 0.02  | <b>-0.20</b> | 0.11         | <b>-0.24</b> | 0.03         | 0.01         | 0.02         | <b>0.49</b>  | 0.03        | 0.09         |
| 21 | Pressure from Negative Affect  | 0.01        | 0.08         | -0.15 | -0.01        | 0.09         | 0.07         | -0.01        | <b>0.32</b>  | 0.04         | <b>0.48</b>  | 0.02        | -0.14        |
| 80 | Connectedness                  | 0.21        | <b>0.23</b>  | -0.03 | 0.00         | -0.12        | 0.01         | 0.05         | -0.03        | -0.01        | <b>-0.29</b> | 0.29        | -0.08        |
| 45 | Connectedness                  | 0.00        | -0.03        | 0.06  | -0.08        | -0.13        | 0.02         | -0.19        | -0.04        | -0.01        | 0.01         | <b>0.57</b> | -0.11        |
| 40 | Resilience and personal coping | -0.04       | 0.14         | -0.09 | 0.04         | -0.01        | 0.02         | -0.04        | 0.24         | -0.26        | 0.10         | <b>0.53</b> | 0.18         |
| 89 | Attachment                     | -0.10       | -0.03        | -0.02 | -0.10        | -0.07        | 0.01         | 0.08         | 0.21         | -0.23        | -0.01        | <b>0.48</b> | -0.05        |
| 55 | Resilience and personal coping | -0.04       | -0.14        | 0.13  | 0.07         | 0.07         | -0.04        | -0.04        | 0.17         | 0.07         | 0.00         | <b>0.46</b> | 0.04         |
| 84 | Resilience and personal coping | 0.10        | 0.17         | -0.10 | 0.23         | -0.16        | -0.34        | 0.28         | -0.12        | -0.03        | 0.01         | <b>0.41</b> | 0.01         |

|    |                                |       |             |       |             |       |       |             |      |       |       |             |             |
|----|--------------------------------|-------|-------------|-------|-------------|-------|-------|-------------|------|-------|-------|-------------|-------------|
| 67 | Resilience and personal coping | -0.01 | 0.16        | 0.10  | -0.15       | -0.18 | -0.02 | 0.22        | 0.02 | -0.15 | 0.03  | <b>0.41</b> | -0.10       |
| 33 | Pressure from Negative Affect  | 0.05  | <b>0.29</b> | -0.07 | -0.07       | -0.03 | -0.02 | 0.05        | 0.02 | -0.13 | 0.02  | 0.01        | <b>0.63</b> |
| 22 | Resilience and personal coping | -0.35 | 0.08        | 0.09  | -0.04       | 0.15  | 0.01  | 0.09        | 0.04 | 0.00  | -0.05 | 0.39        | <b>0.42</b> |
| 47 | Eating problems                | -0.11 | -0.02       | 0.02  | <b>0.21</b> | 0.06  | 0.06  | 0.11        | 0.18 | 0.00  | 0.19  | 0.04        | -0.38       |
| 82 | Independent                    | -0.05 | 0.14        | 0.13  | 0.02        | 0.00  | 0.04  | <b>0.30</b> | 0.00 | 0.15  | -0.04 | 0.00        | 0.35        |

Loadings with absolute values between -0.2 and 0.2 are in gray text to increase interpretability. All loadings greater or equal to 0.4 in absolute value are bolded.

Supplementary Table S4. DIF by sites in Study 3.

| Scale              | Item | Brief description             | Uniform DIF: $\chi^2$ Model 1 v. 2 |                  | Non-Uniform DIF: $\chi^2$ Model 2 v. 3 |                  | Total DIF: $\chi^2$ Model 1 v. 3 |                  |
|--------------------|------|-------------------------------|------------------------------------|------------------|----------------------------------------|------------------|----------------------------------|------------------|
|                    |      |                               | <i>p</i>                           | McFadden's $R^2$ | <i>p</i>                               | McFadden's $R^2$ | <i>p</i>                         | McFadden's $R^2$ |
| Cognitive Problems | 142  | Difficulty focusing           | <.0001                             | 0.0044           | 0.6215                                 | 0.0001           | <.0001                           | 0.0045           |
| Cognitive Problems | 143  | Memory problems               | 0.3222                             | 0.0002           | 0.6667                                 | <.0001           | 0.5584                           | 0.0003           |
| Cognitive Problems | 144  | Mentally slow                 | 0.0723                             | 0.0007           | 0.1343                                 | 0.0005           | 0.0648                           | 0.0012           |
| Cognitive Problems | 145  | Forgetful                     | 0.3204                             | 0.0002           | 0.0055                                 | 0.0017           | 0.0130                           | 0.0020           |
| Cognitive Problems | 146  | Worried brain not working     | <.0001                             | 0.0043           | 0.7618                                 | <.0001           | 0.0001                           | 0.0043           |
| Cognitive Problems | 147  | Not thinking clearly          | <.0001                             | 0.0075           | 0.3953                                 | 0.0002           | <.0001                           | 0.0077           |
| Need for Control   | 26   | Doing things right interferes | 0.2984                             | 0.0003           | 0.6219                                 | 0.0001           | 0.5156                           | 0.0003           |
| Need for Control   | 20   | Worry about carelessness      | 0.3509                             | 0.0002           | 0.3580                                 | 0.0002           | 0.4242                           | 0.0004           |
| Need for Control   | 68   | Don't let others control      | 0.9284                             | <.0001           | 0.8092                                 | <.0001           | 0.9673                           | <.0001           |
| Need for Control   | 130  | Difficult to live with        | 0.7021                             | <.0001           | 0.0736                                 | 0.0008           | 0.1876                           | 0.0008           |
| Eating Problems    | 46   | Afraid lose control of eating | <.0001                             | 0.0109           | 0.0009                                 | 0.0031           | <.0001                           | 0.0141           |
| Eating Problems    | 104  | Worry about weight            | 0.5078                             | 0.0001           | 0.1627                                 | 0.0005           | 0.3030                           | 0.0006           |
| Eating Problems    | 57   | Eating prevents socializing   | 0.1095                             | 0.0010           | 0.1937                                 | 0.0007           | 0.1194                           | 0.0017           |
| Eating Problems    | 18   | Food planning                 | 0.0716                             | 0.0013           | 0.5407                                 | 0.0001           | 0.1637                           | 0.0014           |
| Eating Problems    | 63   | Control food                  | 0.7031                             | <.0001           | 0.6079                                 | 0.0001           | 0.8153                           | 0.0001           |
| Hopelessness       | 15   | Hope                          | 0.7698                             | <.0001           | 0.1946                                 | 0.0004           | 0.4132                           | 0.0004           |
| Hopelessness       | 61   | No hope                       | 0.2203                             | 0.0004           | 0.1592                                 | 0.0005           | 0.1752                           | 0.0008           |
| Hopelessness       | 115  | Things don't get better       | 0.0004                             | 0.0028           | 0.6868                                 | <.0001           | 0.0019                           | 0.0028           |
| Hopelessness       | 24   | Can't handle things           | 0.8816                             | <.0001           | 0.3298                                 | 0.0002           | 0.6152                           | 0.0002           |
| Hopelessness       | 88   | Feel trapped                  | 0.4459                             | 0.0001           | 0.3642                                 | 0.0002           | 0.4955                           | 0.0003           |
| Internal Avoidance | 10   | Emotions help me              | 0.0213                             | 0.0013           | 0.4836                                 | 0.0001           | 0.0552                           | 0.0014           |
| Internal Avoidance | 34   | Avoid emotions                | 0.1876                             | 0.0004           | 0.5363                                 | 0.0001           | 0.3466                           | 0.0005           |

|                      |     |                                    |        |        |        |        |        |        |
|----------------------|-----|------------------------------------|--------|--------|--------|--------|--------|--------|
| Internal Avoidance   | 78  | Avoid thoughts                     | 0.6329 | 0.0001 | 0.3066 | 0.0003 | 0.5290 | 0.0003 |
| Internal Avoidance   | 122 | Shut down feelings                 | 0.0579 | 0.0009 | 0.6662 | <.0001 | 0.1508 | 0.0009 |
| Internal Avoidance   | 123 | If start, feelings would overwhelm | 0.3790 | 0.0002 | 0.8502 | <.0001 | 0.6671 | 0.0002 |
| Recovery Environment | 80  | Have support                       | 0.4151 | 0.0002 | 0.5842 | 0.0001 | 0.6177 | 0.0003 |
| Recovery Environment | 136 | Supportive environment             | 0.0120 | 0.0016 | 0.2135 | 0.0004 | 0.0197 | 0.0020 |
| Recovery Environment | 138 | Satisfied with life                | 0.6253 | 0.0001 | 0.5246 | 0.0001 | 0.7250 | 0.0002 |
| Recovery Environment | 139 | Have opportunity for pleasure      | 0.2301 | 0.0004 | 0.9922 | <.0001 | 0.4866 | 0.0004 |
| Recovery Environment | 137 | Not enough money                   | 0.0329 | 0.0013 | 0.1253 | 0.0007 | 0.0318 | 0.0020 |
| Self-Criticism       | 67  | Like self                          | 0.0002 | 0.0033 | 0.8643 | <.0001 | 0.0012 | 0.0033 |
| Self-Criticism       | 38  | Self-berate                        | 0.1691 | 0.0004 | 0.4128 | 0.0002 | 0.2779 | 0.0006 |
| Self-Criticism       | 126 | Ashamed of self                    | 0.8852 | <.0001 | 0.6461 | 0.0001 | 0.8906 | 0.0001 |
| Self-Criticism       | 124 | Make stupid mistakes               | 0.1335 | 0.0006 | 0.0721 | 0.0008 | 0.0644 | 0.0013 |
| Self-Criticism       | 129 | I am a bad person deep down        | 0.6862 | <.0001 | 0.3880 | 0.0002 | 0.6350 | 0.0002 |
| Self-Criticism       | 127 | Unlovable                          | 0.9407 | <.0001 | 0.5265 | 0.0001 | 0.8160 | 0.0001 |
| Self-Criticism       | 128 | Self-disgust                       | 0.4151 | 0.0002 | 0.9541 | <.0001 | 0.7162 | 0.0002 |
| Self-Criticism       | 101 | Totally worthless                  | 0.3064 | 0.0003 | 0.1932 | 0.0004 | 0.2542 | 0.0007 |
| Social Safety        | 43  | Comfortable w/ friends             | 0.1621 | 0.0005 | 0.6229 | 0.0001 | 0.3334 | 0.0005 |
| Social Safety        | 131 | Comfortable sharing emotions       | 0.0769 | 0.0007 | 0.7187 | <.0001 | 0.1960 | 0.0008 |
| Social Safety        | 40  | Assertive                          | 0.4163 | 0.0002 | 0.8944 | <.0001 | 0.7124 | 0.0002 |
| Social Safety        | 132 | Set limits                         | 0.0383 | 0.0010 | 0.1844 | 0.0004 | 0.0484 | 0.0014 |
| Social Safety        | 62  | Have friends                       | 0.1211 | 0.0006 | 0.3009 | 0.0002 | 0.1761 | 0.0008 |
| Social Safety        | 50  | Trusting                           | 0.0302 | 0.0011 | 0.1698 | 0.0005 | 0.0372 | 0.0016 |
| Somatic Anxiety      | 51  | Restlessness                       | 0.0005 | 0.0028 | 0.0444 | 0.0009 | 0.0003 | 0.0037 |
| Somatic Anxiety      | 103 | Tense all day                      | 0.0082 | 0.0016 | 0.9689 | <.0001 | 0.0302 | 0.0016 |
| Somatic Anxiety      | 75  | Fear without reason                | 0.0625 | 0.0007 | 0.7404 | <.0001 | 0.1671 | 0.0008 |

|                    |     |                                   |        |        |        |        |        |        |
|--------------------|-----|-----------------------------------|--------|--------|--------|--------|--------|--------|
| Somatic Anxiety    | 3   | Physical tension                  | 0.4325 | 0.0001 | 0.1429 | 0.0005 | 0.2513 | 0.0006 |
| Somatic Anxiety    | 53  | Physical arousal                  | 0.1934 | 0.0004 | 0.4131 | 0.0001 | 0.3071 | 0.0005 |
| Substance Recovery | 109 | Can handle problems w/o substance | 0.0620 | 0.0055 | 0.8217 | 0.0001 | 0.1709 | 0.0056 |
| Substance Recovery | 154 | Can manage a day w/o substance    | 0.5039 | 0.0013 | 0.9732 | <.0001 | 0.7993 | 0.0013 |
| Substance Recovery | 108 | Urges manageable                  | 0.1890 | 0.0033 | 0.9633 | <.0001 | 0.4216 | 0.0033 |
| Substance Recovery | 155 | Substance problems are improving  | 0.6279 | 0.0004 | 0.3318 | 0.0016 | 0.5552 | 0.0020 |
| Substance Use      | 59  | Think should reduce use           | 0.6697 | 0.0001 | 0.4792 | 0.0002 | 0.7109 | 0.0003 |
| Substance Use      | 4   | Use interferes                    | 0.7540 | 0.0001 | 0.6263 | 0.0002 | 0.8457 | 0.0002 |
| Substance Use      | 107 | Others worry about Use            | 0.0006 | 0.0072 | 0.4790 | 0.0003 | 0.0023 | 0.0075 |
| Substance Use      | 35  | Concerned dependent               | 0.6110 | 0.0002 | 0.8563 | <.0001 | 0.8643 | 0.0002 |
| Suicide            | 19  | Better if dead                    | 0.5702 | 0.0001 | 0.0188 | 0.0015 | 0.0538 | 0.0016 |
| Suicide            | 105 | Made suicide plans                | 0.1000 | 0.0010 | 0.7703 | <.0001 | 0.2476 | 0.0010 |
| Suicide            | 77  | Scared of impulsive suicide       | 0.3612 | 0.0003 | 0.8768 | <.0001 | 0.6513 | 0.0003 |
| Suicide            | 106 | Decided to kill self              | 0.6705 | 0.0001 | 0.2564 | 0.0008 | 0.4797 | 0.0009 |
| Trauma Reaction    | 111 | Overwhelming memories             | 0.0792 | 0.0009 | 0.7529 | <.0001 | 0.2039 | 0.0009 |
| Trauma Reaction    | 110 | Nightmares                        | 0.5611 | 0.0001 | 0.5161 | 0.0001 | 0.6840 | 0.0002 |
| Trauma Reaction    | 113 | Alert to dangers                  | 0.0175 | 0.0015 | 0.2923 | 0.0003 | 0.0341 | 0.0018 |
| Trauma Reaction    | 112 | Try to control memories           | 0.0194 | 0.0017 | 0.5577 | 0.0001 | 0.0547 | 0.0018 |

---

Note. Rows where McFadden's  $R^2 < .02$  are presented in gray text for clarity. That is all rows in this analysis.

Supplementary Table S5. DIF by age in Study 3

| Scale                | Item | Uniform DIF: $\chi^2$<br>Model 1 v. 2 |                     | Total DIF: $\chi^2$ Model<br>1 v. 3 |                     | Non-Uniform DIF:<br>$\chi^2$ Model 2 v. 3 |                     |
|----------------------|------|---------------------------------------|---------------------|-------------------------------------|---------------------|-------------------------------------------|---------------------|
|                      |      | <i>p</i>                              | McFadden's<br>$R^2$ | <i>p</i>                            | McFadden's<br>$R^2$ | <i>p</i>                                  | McFadden's<br>$R^2$ |
| Cognitive Problems   | 142  | <.001                                 | 0.006               | <.001                               | 0.006               | 0.727                                     | <.001               |
| Cognitive Problems   | 143  | 0.001                                 | 0.003               | 0.002                               | 0.003               | 0.183                                     | 0.000               |
| Cognitive Problems   | 144  | 0.272                                 | 0.000               | 0.328                               | 0.001               | 0.312                                     | 0.000               |
| Cognitive Problems   | 145  | 0.001                                 | 0.002               | 0.005                               | 0.002               | 0.748                                     | <.001               |
| Cognitive Problems   | 146  | 0.654                                 | <.001               | 0.128                               | 0.001               | 0.048                                     | 0.001               |
| Cognitive Problems   | 147  | <.001                                 | 0.005               | <.001                               | 0.006               | 0.162                                     | 0.000               |
| Need for Control     | 26   | 0.085                                 | 0.001               | 0.110                               | 0.001               | 0.230                                     | 0.000               |
| Need for Control     | 20   | <.001                                 | 0.005               | <.001                               | 0.007               | 0.012                                     | 0.002               |
| Need for Control     | 68   | 0.691                                 | <.001               | 0.806                               | 0.000               | 0.600                                     | 0.000               |
| Need for Control     | 130  | 0.726                                 | <.001               | 0.940                               | <.001               | 0.969                                     | <.001               |
| Eating Problems      | 46   | 0.028                                 | 0.001               | 0.072                               | 0.002               | 0.500                                     | 0.000               |
| Eating Problems      | 104  | 0.848                                 | <.001               | 0.422                               | 0.000               | 0.194                                     | 0.000               |
| Eating Problems      | 57   | 0.076                                 | 0.001               | 0.163                               | 0.002               | 0.487                                     | 0.000               |
| Eating Problems      | 18   | 0.825                                 | <.001               | 0.937                               | 0.000               | 0.776                                     | <.001               |
| Eating Problems      | 63   | 0.227                                 | 0.000               | 0.475                               | 0.000               | 0.867                                     | <.001               |
| Hopelessness         | 15   | 0.628                                 | 0.000               | 0.857                               | 0.000               | 0.785                                     | <.001               |
| Hopelessness         | 61   | 0.126                                 | 0.001               | 0.217                               | 0.001               | 0.399                                     | 0.000               |
| Hopelessness         | 115  | 0.279                                 | 0.000               | 0.434                               | 0.000               | 0.479                                     | 0.000               |
| Hopelessness         | 24   | 0.516                                 | 0.000               | 0.257                               | 0.001               | 0.130                                     | 0.001               |
| Hopelessness         | 88   | 0.338                                 | 0.000               | 0.442                               | 0.000               | 0.397                                     | 0.000               |
| Internal Avoidance   | 10   | 0.000                                 | 0.004               | 0.000                               | 0.004               | 0.448                                     | 0.000               |
| Internal Avoidance   | 34   | 0.379                                 | 0.000               | 0.640                               | 0.000               | 0.733                                     | <.001               |
| Internal Avoidance   | 78   | 0.347                                 | 0.000               | 0.605                               | 0.000               | 0.731                                     | <.001               |
| Internal Avoidance   | 122  | 0.891                                 | <.001               | 0.887                               | 0.000               | 0.638                                     | 0.000               |
| Internal Avoidance   | 123  | 0.077                                 | 0.001               | 0.198                               | 0.001               | 0.738                                     | <.001               |
| Recovery Environment | 80   | 0.004                                 | 0.002               | 0.010                               | 0.003               | 0.437                                     | 0.000               |
| Recovery Environment | 136  | 0.427                                 | 0.000               | 0.710                               | 0.000               | 0.820                                     | <.001               |
| Recovery Environment | 138  | 0.000                                 | 0.003               | <.001                               | 0.006               | 0.002                                     | 0.003               |
| Recovery Environment | 139  | 0.492                                 | 0.000               | 0.731                               | 0.000               | 0.694                                     | <.001               |
| Recovery Environment | 137  | 0.974                                 | <.001               | 0.421                               | 0.001               | 0.189                                     | 0.001               |
| Self-Criticism       | 67   | 0.989                                 | <.001               | 0.272                               | 0.001               | 0.106                                     | 0.001               |
| Self-Criticism       | 38   | 0.002                                 | 0.002               | 0.002                               | 0.003               | 0.087                                     | 0.001               |
| Self-Criticism       | 126  | 0.206                                 | 0.000               | 0.449                               | 0.000               | 0.981                                     | <.001               |
| Self-Criticism       | 124  | 0.300                                 | 0.000               | 0.001                               | 0.003               | 0.001                                     | 0.003               |



|                    |     |       |       |       |       |       |       |
|--------------------|-----|-------|-------|-------|-------|-------|-------|
| Self-Criticism     | 129 | 0.064 | 0.001 | 0.145 | 0.001 | 0.514 | 0.000 |
| Self-Criticism     | 127 | 0.142 | 0.001 | 0.219 | 0.001 | 0.347 | 0.000 |
| Self-Criticism     | 128 | 0.020 | 0.001 | 0.063 | 0.001 | 0.742 | <.001 |
| Self-Criticism     | 101 | 0.001 | 0.003 | 0.004 | 0.003 | 0.641 | 0.000 |
| Social Safety      | 43  | 0.821 | <.001 | 0.871 | 0.000 | 0.636 | 0.000 |
| Social Safety      | 131 | 0.011 | 0.002 | 0.032 | 0.002 | 0.501 | 0.000 |
| Social Safety      | 40  | 0.003 | 0.002 | 0.010 | 0.002 | 0.647 | 0.000 |
| Social Safety      | 132 | 0.309 | 0.000 | 0.390 | 0.000 | 0.357 | 0.000 |
| Social Safety      | 62  | 0.187 | 0.000 | 0.310 | 0.001 | 0.437 | 0.000 |
| Social Safety      | 50  | 0.000 | 0.003 | 0.001 | 0.004 | 0.116 | 0.001 |
| Somatic Anxiety    | 51  | 0.007 | 0.002 | 0.000 | 0.005 | 0.001 | 0.003 |
| Somatic Anxiety    | 103 | 0.552 | 0.000 | 0.790 | 0.000 | 0.732 | <.001 |
| Somatic Anxiety    | 75  | <.001 | 0.004 | <.001 | 0.004 | 0.071 | 0.001 |
| Somatic Anxiety    | 3   | 0.000 | 0.003 | 0.000 | 0.004 | 0.030 | 0.001 |
| Somatic Anxiety    | 53  | 0.006 | 0.002 | 0.018 | 0.002 | 0.535 | 0.000 |
| Substance Recovery | 109 | 0.207 | 0.003 | 0.407 | 0.003 | 0.648 | 0.000 |
| Substance Recovery | 154 | 0.482 | 0.002 | 0.778 | 0.002 | 0.930 | <.001 |
| Substance Recovery | 108 | 0.219 | 0.003 | 0.454 | 0.003 | 0.795 | 0.000 |
| Substance Recovery | 155 | 0.986 | <.001 | 0.607 | 0.002 | 0.318 | 0.002 |
| Substance Use      | 59  | 0.445 | 0.000 | 0.712 | 0.000 | 0.757 | <.001 |
| Substance Use      | 4   | 0.504 | 0.000 | 0.278 | 0.002 | 0.146 | 0.001 |
| Substance Use      | 107 | 0.567 | 0.000 | 0.483 | 0.001 | 0.289 | 0.001 |
| Substance Use      | 35  | 0.000 | 0.009 | 0.001 | 0.010 | 0.133 | 0.002 |
| Suicide            | 19  | 0.774 | <.001 | 0.498 | 0.000 | 0.252 | 0.000 |
| Suicide            | 105 | 0.181 | 0.001 | 0.247 | 0.001 | 0.315 | 0.000 |
| Suicide            | 77  | 0.742 | <.001 | 0.916 | 0.000 | 0.795 | <.001 |
| Suicide            | 106 | 0.000 | 0.010 | 0.000 | 0.012 | 0.071 | 0.002 |
| Trauma Reaction    | 111 | 0.442 | 0.000 | 0.408 | 0.001 | 0.273 | 0.000 |
| Trauma Reaction    | 110 | 0.059 | 0.001 | 0.168 | 0.001 | 0.912 | <.001 |
| Trauma Reaction    | 113 | 0.289 | 0.000 | 0.522 | 0.000 | 0.674 | <.001 |
| Trauma Reaction    | 112 | 0.108 | 0.001 | 0.262 | 0.001 | 0.762 | <.001 |

Note. Rows where McFadden's  $R^2 < .02$  are presented in gray text for clarity. That is all rows in this analysis.

Supplementary Table S6. DIF by gender in Study 3.

| Scale                | Item | Uniform DIF: $\chi^2$ Model<br>1 v. 2 |                                     | Total DIF: $\chi^2$ Model 1<br>v. 3 |                                     | Non-Uniform DIF: $\chi^2$<br>Model 2 v. 3 |                                  |
|----------------------|------|---------------------------------------|-------------------------------------|-------------------------------------|-------------------------------------|-------------------------------------------|----------------------------------|
|                      |      | <i>p</i>                              | McFadden's<br><i>R</i> <sup>2</sup> | <i>p</i>                            | McFadden's<br><i>R</i> <sup>2</sup> | <i>p</i>                                  | McFadden's <i>R</i> <sup>2</sup> |
| Cognitive Problems   | 142  | 0.375                                 | 0.000                               | 0.150                               | 0.001                               | 0.083                                     | 0.001                            |
| Cognitive Problems   | 143  | 0.205                                 | 0.000                               | 0.212                               | 0.001                               | 0.222                                     | 0.000                            |
| Cognitive Problems   | 144  | 0.234                                 | 0.000                               | 0.315                               | 0.001                               | 0.346                                     | 0.000                            |
| Cognitive Problems   | 145  | 0.202                                 | 0.000                               | 0.207                               | 0.001                               | 0.217                                     | 0.000                            |
| Cognitive Problems   | 146  | 0.010                                 | 0.002                               | 0.034                               | 0.002                               | 0.752                                     | <.001                            |
| Cognitive Problems   | 147  | 0.005                                 | 0.002                               | 0.016                               | 0.002                               | 0.466                                     | 0.000                            |
| Need for Control     | 26   | 0.527                                 | 0.000                               | 0.591                               | 0.000                               | 0.419                                     | 0.000                            |
| Need for Control     | 20   | 0.342                                 | 0.000                               | 0.231                               | 0.001                               | 0.154                                     | 0.001                            |
| Need for Control     | 68   | <.001                                 | 0.009                               | <.001                               | 0.010                               | 0.070                                     | 0.001                            |
| Need for Control     | 130  | 0.000                                 | 0.004                               | 0.001                               | 0.004                               | 0.920                                     | <.001                            |
| Eating Problems      | 46   | <.001                                 | 0.014                               | <.001                               | 0.015                               | 0.122                                     | 0.001                            |
| Eating Problems      | 104  | <.001                                 | <b>0.021</b>                        | <.001                               | <b>0.021</b>                        | <b>0.371</b>                              | <b>0.000</b>                     |
| Eating Problems      | 57   | 0.338                                 | 0.000                               | 0.319                               | 0.001                               | 0.242                                     | 0.001                            |
| Eating Problems      | 18   | <.001                                 | 0.013                               | <.001                               | 0.013                               | 0.285                                     | 0.001                            |
| Eating Problems      | 63   | 0.210                                 | 0.000                               | 0.449                               | 0.000                               | 0.865                                     | <.001                            |
| Hopelessness         | 15   | 0.109                                 | 0.001                               | 0.179                               | 0.001                               | 0.350                                     | 0.000                            |
| Hopelessness         | 61   | <.001                                 | 0.005                               | <.001                               | 0.005                               | 0.470                                     | 0.000                            |
| Hopelessness         | 115  | 0.428                                 | 0.000                               | 0.373                               | 0.000                               | 0.246                                     | 0.000                            |
| Hopelessness         | 24   | 0.104                                 | 0.001                               | 0.263                               | 0.001                               | 0.887                                     | <.001                            |
| Hopelessness         | 88   | 0.615                                 | 0.000                               | 0.833                               | 0.000                               | 0.738                                     | <.001                            |
| Internal Avoidance   | 10   | 0.733                                 | <.001                               | 0.854                               | 0.000                               | 0.656                                     | <.001                            |
| Internal Avoidance   | 34   | 0.940                                 | <.001                               | 0.990                               | <.001                               | 0.904                                     | <.001                            |
| Internal Avoidance   | 78   | 0.427                                 | 0.000                               | 0.652                               | 0.000                               | 0.636                                     | 0.000                            |
| Internal Avoidance   | 122  | <.001                                 | 0.007                               | <.001                               | 0.007                               | 0.968                                     | <.001                            |
| Internal Avoidance   | 123  | 0.000                                 | 0.003                               | 0.001                               | 0.003                               | 0.961                                     | <.001                            |
| Recovery Environment | 80   | 0.735                                 | <.001                               | 0.720                               | 0.000                               | 0.461                                     | 0.000                            |
| Recovery Environment | 136  | 0.771                                 | <.001                               | 0.253                               | 0.001                               | 0.103                                     | 0.001                            |
| Recovery Environment | 138  | <.001                                 | 0.005                               | <.001                               | 0.008                               | 0.002                                     | 0.002                            |
| Recovery Environment | 139  | 0.000                                 | 0.004                               | 0.001                               | 0.004                               | 0.777                                     | <.001                            |
| Recovery Environment | 137  | 0.703                                 | <.001                               | 0.927                               | <.001                               | 0.945                                     | <.001                            |
| Self-Criticism       | 67   | 0.296                                 | 0.000                               | 0.287                               | 0.001                               | 0.236                                     | 0.000                            |
| Self-Criticism       | 38   | 0.290                                 | 0.000                               | 0.572                               | 0.000                               | 0.977                                     | <.001                            |
| Self-Criticism       | 126  | 0.013                                 | 0.002                               | 0.044                               | 0.002                               | 0.830                                     | <.001                            |
| Self-Criticism       | 124  | 0.449                                 | 0.000                               | 0.650                               | 0.000                               | 0.591                                     | 0.000                            |
| Self-Criticism       | 129  | 0.723                                 | <.001                               | 0.346                               | 0.001                               | 0.158                                     | 0.001                            |

|                    |     |       |       |       |       |       |       |
|--------------------|-----|-------|-------|-------|-------|-------|-------|
| Self-Criticism     | 127 | 0.241 | 0.000 | 0.445 | 0.000 | 0.622 | 0.000 |
| Self-Criticism     | 128 | 0.010 | 0.002 | 0.037 | 0.002 | 0.842 | <.001 |
| Self-Criticism     | 101 | 0.015 | 0.002 | 0.017 | 0.002 | 0.126 | 0.001 |
| Social Safety      | 43  | 0.659 | <.001 | 0.841 | 0.000 | 0.699 | <.001 |
| Social Safety      | 131 | <.001 | 0.005 | <.001 | 0.005 | 0.918 | <.001 |
| Social Safety      | 40  | 0.120 | 0.001 | 0.279 | 0.001 | 0.719 | <.001 |
| Social Safety      | 132 | 0.004 | 0.002 | 0.014 | 0.002 | 0.741 | <.001 |
| Social Safety      | 62  | 0.001 | 0.003 | <.001 | 0.005 | 0.003 | 0.002 |
| Social Safety      | 50  | <.001 | 0.008 | <.001 | 0.008 | 0.981 | <.001 |
| Somatic Anxiety    | 51  | 0.873 | <.001 | 0.980 | <.001 | 0.899 | <.001 |
| Somatic Anxiety    | 103 | <.001 | 0.008 | <.001 | 0.009 | 0.045 | 0.001 |
| Somatic Anxiety    | 75  | 0.112 | 0.001 | 0.041 | 0.001 | 0.050 | 0.001 |
| Somatic Anxiety    | 3   | <.001 | 0.010 | <.001 | 0.014 | <.001 | 0.004 |
| Somatic Anxiety    | 53  | 0.006 | 0.002 | <.001 | 0.006 | <.001 | 0.004 |
| Substance Recovery | 109 | 0.760 | 0.000 | 0.949 | 0.000 | 0.912 | <.001 |
| Substance Recovery | 154 | 0.429 | 0.002 | 0.602 | 0.003 | 0.532 | 0.001 |
| Substance Recovery | 108 | 0.912 | <.001 | 0.732 | 0.001 | 0.434 | 0.001 |
| Substance Recovery | 155 | 0.610 | 0.000 | 0.872 | 0.000 | 0.911 | <.001 |
| Substance Use      | 59  | 0.026 | 0.002 | 0.082 | 0.002 | 0.926 | <.001 |
| Substance Use      | 4   | 0.984 | <.001 | 0.692 | 0.001 | 0.391 | 0.001 |
| Substance Use      | 107 | 0.167 | 0.001 | 0.135 | 0.003 | 0.148 | 0.001 |
| Substance Use      | 35  | 0.839 | <.001 | 0.979 | <.001 | 0.986 | <.001 |
| Suicide            | 19  | 0.586 | 0.000 | 0.437 | 0.000 | 0.244 | 0.000 |
| Suicide            | 105 | 0.005 | 0.003 | <.001 | 0.009 | 0.000 | 0.006 |
| Suicide            | 77  | 0.874 | <.001 | 0.552 | 0.000 | 0.281 | 0.000 |
| Suicide            | 106 | 0.450 | 0.000 | 0.150 | 0.002 | 0.072 | 0.002 |
| Trauma Reaction    | 111 | 0.340 | 0.000 | 0.617 | 0.000 | 0.816 | <.001 |
| Trauma Reaction    | 110 | 0.199 | 0.001 | 0.294 | 0.001 | 0.371 | 0.000 |
| Trauma Reaction    | 113 | 0.156 | 0.001 | 0.366 | 0.001 | 0.984 | <.001 |
| Trauma Reaction    | 112 | 0.001 | 0.004 | 0.001 | 0.004 | 0.207 | 0.001 |

Note. Rows where McFadden's  $R^2 < .02$  are presented in gray text for clarity.

# Analysis results supplement to ‘Initial quantitative development of the Norse Feedback system A novel clinical feedback system for routine mental healthcare’

Andrew A. McAleavey, Samuel S. Nordberg, & Christian Moltu

November 19, 2020

## Contents

|                                                  |          |
|--------------------------------------------------|----------|
| <b>Summary</b>                                   | <b>5</b> |
| <b>Preliminary</b>                               | <b>6</b> |
| Functions . . . . .                              | 6        |
| Reading data . . . . .                           | 6        |
| <b>Study 2: Scale performance</b>                | <b>7</b> |
| Attachment . . . . .                             | 7        |
| Reliability: Attachment . . . . .                | 7        |
| Unidimensionality: Attachment . . . . .          | 7        |
| Graded-Response Model: Attachment . . . . .      | 8        |
| Gender-based DIF: Attachment . . . . .           | 9        |
| Sample-based DIF: Attachment . . . . .           | 12       |
| Avoidance . . . . .                              | 13       |
| Reliability: Avoidance . . . . .                 | 13       |
| Unidimensionality: Avoidance . . . . .           | 14       |
| Graded-Response Model: Avoidance . . . . .       | 15       |
| Gender-based DIF: Avoidance . . . . .            | 16       |
| Sample-based DIF: Avoidance . . . . .            | 19       |
| Connectedness . . . . .                          | 20       |
| Reliability: Connectedness . . . . .             | 20       |
| Unidimensionality: Connectedness . . . . .       | 21       |
| Graded-Response Model: Connectedness . . . . .   | 22       |
| Gender-based DIF: Connectedness . . . . .        | 23       |
| Sample-based DIF: Connectedness . . . . .        | 26       |
| Demoralization . . . . .                         | 27       |
| Reliability: Demoralization . . . . .            | 27       |
| Unidimensionality: Demoralization . . . . .      | 28       |
| Graded-Response Model: Demoralization . . . . .  | 29       |
| Gender-based DIF: Demoralization . . . . .       | 30       |
| Sample-based DIF: Demoralization . . . . .       | 32       |
| Eating Problems . . . . .                        | 33       |
| Reliability: Eating Problems . . . . .           | 33       |
| Unidimensionality: Eating Problems . . . . .     | 34       |
| Graded-Response Model: Eating Problems . . . . . | 35       |
| Gender-based DIF: Eating Problems . . . . .      | 36       |
| Sample-based DIF: Eating Problems . . . . .      | 39       |

|                                                                |    |
|----------------------------------------------------------------|----|
| Hypervigilance . . . . .                                       | 40 |
| Reliability: Hypervigilance . . . . .                          | 40 |
| Unidimensionality: Hypervigilance . . . . .                    | 40 |
| Graded-Response Model: Hypervigilance . . . . .                | 41 |
| Gender-based DIF: Hypervigilance . . . . .                     | 42 |
| Sample-based DIF: Hypervigilance . . . . .                     | 43 |
| Pressure from Negative Affect . . . . .                        | 43 |
| Reliability: Pressure from Negative Affect . . . . .           | 43 |
| Unidimensionality: Pressure from Negative Affect . . . . .     | 44 |
| Graded-Response Model: Pressure from Negative Affect . . . . . | 45 |
| Gender-based DIF: Pressure from Negative Affect . . . . .      | 46 |
| Sample-based DIF: Pressure from Negative Affect . . . . .      | 49 |
| Perfectionism . . . . .                                        | 50 |
| Reliability: Perfectionism . . . . .                           | 50 |
| Unidimensionality: Perfectionism . . . . .                     | 50 |
| Graded-Response Model: Perfectionism . . . . .                 | 51 |
| Gender-based DIF: Perfectionism . . . . .                      | 52 |
| Sample-based DIF: Perfectionism . . . . .                      | 55 |
| Psychosis . . . . .                                            | 58 |
| Reliability: Psychosis . . . . .                               | 58 |
| Unidimensionality: Psychosis . . . . .                         | 59 |
| Graded-Response Model: Psychosis . . . . .                     | 60 |
| Gender-based DIF: Psychosis . . . . .                          | 61 |
| Sample-based DIF: Psychosis . . . . .                          | 61 |
| Relational Distress . . . . .                                  | 61 |
| Reliability: Relational Distress . . . . .                     | 61 |
| Unidimensionality: Relational Distress . . . . .               | 62 |
| Graded-Response Model: Relational Distress . . . . .           | 63 |
| Gender-based DIF: Relational Distress . . . . .                | 64 |
| Sample-based DIF: Relational Distress . . . . .                | 67 |
| Resilience . . . . .                                           | 68 |
| Reliability: Resilience . . . . .                              | 68 |
| Unidimensionality: Resilience . . . . .                        | 68 |
| Graded-Response Model: Resilience . . . . .                    | 69 |
| Gender-based DIF: Resilience . . . . .                         | 71 |
| Sample-based DIF: Resilience . . . . .                         | 74 |
| Hurtful Rumination . . . . .                                   | 79 |
| Reliability: Hurtful Rumination . . . . .                      | 79 |
| Unidimensionality: Hurtful Rumination . . . . .                | 80 |
| Graded-Response Model: Hurtful Rumination . . . . .            | 81 |
| Gender-based DIF: Hurtful Rumination . . . . .                 | 82 |
| Sample-based DIF: Hurtful Rumination . . . . .                 | 85 |
| Social Role Functioning . . . . .                              | 87 |
| Reliability: Social Role Functioning . . . . .                 | 87 |
| Unidimensionality: Social Role Functioning . . . . .           | 88 |
| Graded-Response Model: Social Role Functioning . . . . .       | 89 |
| Gender-based DIF: Social Role Functioning . . . . .            | 90 |
| Sample-based DIF: Social Role Functioning . . . . .            | 90 |
| Somatic Anxiety . . . . .                                      | 91 |
| Reliability: Somatic Anxiety . . . . .                         | 91 |
| Unidimensionality: Somatic Anxiety . . . . .                   | 92 |
| Graded-Response Model: Somatic Anxiety . . . . .               | 93 |
| Gender-based DIF: Somatic Anxiety . . . . .                    | 94 |
| Sample-based DIF: Somatic Anxiety . . . . .                    | 97 |

|                                                |            |
|------------------------------------------------|------------|
| Substance Use . . . . .                        | 98         |
| Reliability: Substance Use . . . . .           | 98         |
| Unidimensionality: Substance Use . . . . .     | 98         |
| Graded-Response Model: Substance Use . . . . . | 99         |
| Gender-based DIF: Substance Use . . . . .      | 100        |
| Sample-based DIF: Substance Use . . . . .      | 101        |
| Suicide Risk . . . . .                         | 101        |
| Reliability: Suicide Risk . . . . .            | 101        |
| Unidimensionality: Suicide Risk . . . . .      | 102        |
| Graded-Response Model: Suicide Risk . . . . .  | 103        |
| Gender-based DIF: Suicide Risk . . . . .       | 104        |
| Sample-based DIF: Suicide Risk . . . . .       | 104        |
| <b>Study 2: ROC curves</b>                     | <b>105</b> |
| Attachment . . . . .                           | 105        |
| Avoidance . . . . .                            | 106        |
| Connectedness . . . . .                        | 107        |
| Demoralization . . . . .                       | 108        |
| Eating problems . . . . .                      | 109        |
| Hurtful rumination . . . . .                   | 110        |
| Hypervigilance . . . . .                       | 111        |
| Perfectionism . . . . .                        | 112        |
| Pressure from Negative Affect . . . . .        | 113        |
| Psychosis . . . . .                            | 114        |
| Relational distress . . . . .                  | 115        |
| Resilience . . . . .                           | 116        |
| Social Role Functioning . . . . .              | 117        |
| Somatic Anxiety . . . . .                      | 118        |
| Substance Use . . . . .                        | 119        |
| Suicide Risk . . . . .                         | 120        |
| <b>Study 3: Scale performance</b>              | <b>120</b> |
| Eating Problems . . . . .                      | 120        |
| Site 1 . . . . .                               | 120        |
| Site 2 . . . . .                               | 123        |
| Site DIF . . . . .                             | 126        |
| Gender-based DIF: Eating Problems . . . . .    | 128        |
| Age-based DIF: Eating Problems . . . . .       | 132        |
| Sad Affect . . . . .                           | 132        |
| Site 1 . . . . .                               | 132        |
| Site 2 . . . . .                               | 135        |
| Gender-based DIF: Sad Affect . . . . .         | 138        |
| Age-based DIF: Sad Affect . . . . .            | 138        |
| Somatic Anxiety . . . . .                      | 138        |
| Site 1 . . . . .                               | 138        |
| Site 2 . . . . .                               | 141        |
| Site DIF . . . . .                             | 144        |
| Gender-based DIF: Somatic Anxiety . . . . .    | 146        |
| Age-based DIF: Somatic Anxiety . . . . .       | 150        |
| Substance Use . . . . .                        | 154        |
| Site 1 . . . . .                               | 154        |
| Site 2 . . . . .                               | 157        |
| Site DIF . . . . .                             | 160        |
| Gender-based DIF: Substance Use . . . . .      | 162        |

|                                                    |     |
|----------------------------------------------------|-----|
| Age-based DIF: Substance Use . . . . .             | 163 |
| Suicide . . . . .                                  | 165 |
| Site 1 . . . . .                                   | 165 |
| Site 2 . . . . .                                   | 166 |
| Gender-based DIF: Suicide . . . . .                | 168 |
| Age-based DIF: Suicide . . . . .                   | 170 |
| Trauma Reaction . . . . .                          | 173 |
| Site 1 . . . . .                                   | 173 |
| Site 2 . . . . .                                   | 176 |
| Site DIF . . . . .                                 | 179 |
| Gender-based DIF: Trauma Reaction . . . . .        | 181 |
| Age-based DIF: Trauma Reaction . . . . .           | 184 |
| Readiness for Recovery . . . . .                   | 184 |
| Site 1 . . . . .                                   | 184 |
| Site 2 . . . . .                                   | 187 |
| Gender-based DIF: Readiness for Recovery . . . . . | 190 |
| Age-based DIF: Readiness for Recovery . . . . .    | 190 |
| Recovery Environment . . . . .                     | 190 |
| Site 1 . . . . .                                   | 190 |
| Site 2 . . . . .                                   | 193 |
| Site DIF . . . . .                                 | 196 |
| Gender-based DIF: Recovery Environment . . . . .   | 196 |
| Age-based DIF: Recovery Environment . . . . .      | 199 |
| Social Safety . . . . .                            | 202 |
| Site 1 . . . . .                                   | 202 |
| Site 2 . . . . .                                   | 205 |
| Site DIF . . . . .                                 | 208 |
| Gender-based DIF: Social Safety . . . . .          | 209 |
| Age-based DIF: Social Safety . . . . .             | 213 |
| Need for Control . . . . .                         | 216 |
| Site 1 . . . . .                                   | 216 |
| Site 2 . . . . .                                   | 219 |
| Site DIF . . . . .                                 | 222 |
| Gender-based DIF: Need for Control . . . . .       | 222 |
| Age-based DIF: Need for Control . . . . .          | 225 |
| Hopelessness . . . . .                             | 228 |
| Site 1 . . . . .                                   | 228 |
| Site 2 . . . . .                                   | 231 |
| Site DIF . . . . .                                 | 234 |
| Gender-based DIF: Hopelessness . . . . .           | 236 |
| Age-based DIF: Hopelessness . . . . .              | 239 |
| Internal Avoidance . . . . .                       | 239 |
| Site 1 . . . . .                                   | 239 |
| Site 2 . . . . .                                   | 242 |
| Site DIF . . . . .                                 | 245 |
| Gender-based DIF: Internal Avoidance . . . . .     | 247 |
| Age-based DIF: Internal Avoidance . . . . .        | 250 |
| Irritability . . . . .                             | 253 |
| Site 1 . . . . .                                   | 253 |
| Site 2 . . . . .                                   | 256 |
| Gender-based DIF: Irritability . . . . .           | 259 |
| Age-based DIF: Irritability . . . . .              | 259 |
| Self-Criticism . . . . .                           | 259 |
| Site 1 . . . . .                                   | 259 |

|                                                   |            |
|---------------------------------------------------|------------|
| Site 2 . . . . .                                  | 262        |
| Site DIF . . . . .                                | 265        |
| Gender-based DIF: Self-Criticism . . . . .        | 267        |
| Age-based DIF: Self-Criticism . . . . .           | 268        |
| Situational Avoidance . . . . .                   | 271        |
| Site 1 . . . . .                                  | 271        |
| Site 2 . . . . .                                  | 274        |
| Gender-based DIF: Situational Avoidance . . . . . | 277        |
| Age-based DIF: Situational Avoidance . . . . .    | 277        |
| Social Avoidance . . . . .                        | 277        |
| Site 1 . . . . .                                  | 277        |
| Site 2 . . . . .                                  | 280        |
| Gender-based DIF: Social Avoidance . . . . .      | 283        |
| Age-based DIF: Social Avoidance . . . . .         | 283        |
| Worry . . . . .                                   | 283        |
| Site 1 . . . . .                                  | 283        |
| Site 2 . . . . .                                  | 286        |
| Gender-based DIF: Worry . . . . .                 | 289        |
| Age-based DIF: Worry . . . . .                    | 289        |
| Cognitive Problems . . . . .                      | 289        |
| Site 1 . . . . .                                  | 289        |
| Site 2 . . . . .                                  | 292        |
| Site DIF . . . . .                                | 295        |
| Gender-based DIF: Cognitive Problems . . . . .    | 299        |
| Age-based DIF: Cognitive Problems . . . . .       | 302        |
| General Functioning . . . . .                     | 306        |
| Site 1 . . . . .                                  | 306        |
| Site 2 . . . . .                                  | 309        |
| Gender-based DIF: General Functioning . . . . .   | 312        |
| Age-based DIF: General Functioning . . . . .      | 312        |
| Substance Recovery . . . . .                      | 312        |
| Site 1 . . . . .                                  | 312        |
| Site 2 . . . . .                                  | 315        |
| Gender-based DIF: Substance Recovery . . . . .    | 315        |
| Age-based DIF: Substance Recovery . . . . .       | 315        |
| <b>Session Information</b> . . . . .              | <b>316</b> |
| Functions . . . . .                               | 316        |
| Session Info . . . . .                            | 322        |

This is the analysis output companion supplement to “Initial quantitative development of the Norse Feedback system: A novel adaptive multidimensional tool for use in routine mental healthcare.” **If you are NOT reading this in the HTML version, we strongly advise that you do so, as this document is too long to navigate as a PDF.** Proceed to this webpage ([https://osf.io/6xvmf/?view\\_only=fcbfbb26e65c4c7bbb6e8cede3e975bc](https://osf.io/6xvmf/?view_only=fcbfbb26e65c4c7bbb6e8cede3e975bc)), download the HTML version, and open that file using your web browser. The contents are identical to this document.

## Summary

This supplement is ordered roughly by the order of the manuscript.

The *Preliminary* section covers some essential but not substantively important work. Specifically it includes the R language code for the custom functions used in these analyses, to ease replication.



In *Study 2: Scale performance*, we present information on each scale’s reliability (Cronbach’s alpha, mean item-total correlation, and alpha if removed statistics), unidimensionality (scree plot, eigenvalue ratio, actual eigenvalues, and factor analysis output including goodness of fit), a graded response model for that scale, along with DIF analyses for gender and sample (clinical vs. nonclinical). The outputs are a combination of standard software-generated outputs and synthesized results.

These analytic outputs are already described in the text, but as we could not feasibly include all meaningful information for each scale in a single table, interested readers are directed to these individual scale analyses. Relevant DIF output includes the number of items flagged for DIF, along with the magnitude of effect size.

In *Study 2: ROC curves*, we present visual representations of the scales’ discrimination abilities between the clinical and nonclinical samples in this study.

In *Study 3: Scale performance*, we present very similar analyses to those presented in *Study 2: Scale performance*. The primary differences are in the group comparisons for DIF analysis. Outputs are similar or exactly the same.

The *Session Information* section contains the custom functions and loaded packages required to run these analyses.

## Preliminary

Loaded libraries are found at the end of this document, along with version numbers of packages and R. We omit the call here for legibility.

### Functions

Several convenience and analysis functions are defined at this point in the report with suppressed output, and are repeated in the *Session Information* section at the end of the document.

These functions rely on objects of type `grm` from the package `{ltm}` and type `roc` from the package `{pROC}`, among others. Again, they are actually defined at this point in the analysis code, but are not presented until the final section of this document for reference.

All installed packages are included in the Session Information section below. The subsequent code loops through different repeatable reports, each with several functions for each scale, and knits a single report from them.

### Reading data

This section imports data from external repositories, the location of which is obscured for security reasons. Some (but not all) analysis objects are read into the global environment from previously-saved locations. This reduces compilation time of this supplement. Reproduction of analyses is still demonstrated within the code below. Interested readers may examine all code upon request (to AAM), though most analysis code is not included for here for clarity.

## Study 2: Scale performance

### Attachment

#### Reliability: Attachment

```
## Cronbach's alpha is 0.607.  
## Mean item-total correlation is 0.278.  
## If each item were dropped:  
##      raw_alpha std.alpha G6(smc) average_r S/N alpha se  var.r med.r  
## Q41      0.49      0.49   0.40      0.24 0.96   0.035 0.00670 0.21  
## Q1       0.57      0.57   0.47      0.30 1.31   0.030 0.00089 0.30  
## Q50-    0.54      0.54   0.45      0.29 1.20   0.032 0.00584 0.28  
## Q89     0.54      0.54   0.45      0.28 1.17   0.032 0.00885 0.30
```

#### Unidimensionality: Attachment

### Scree Plot

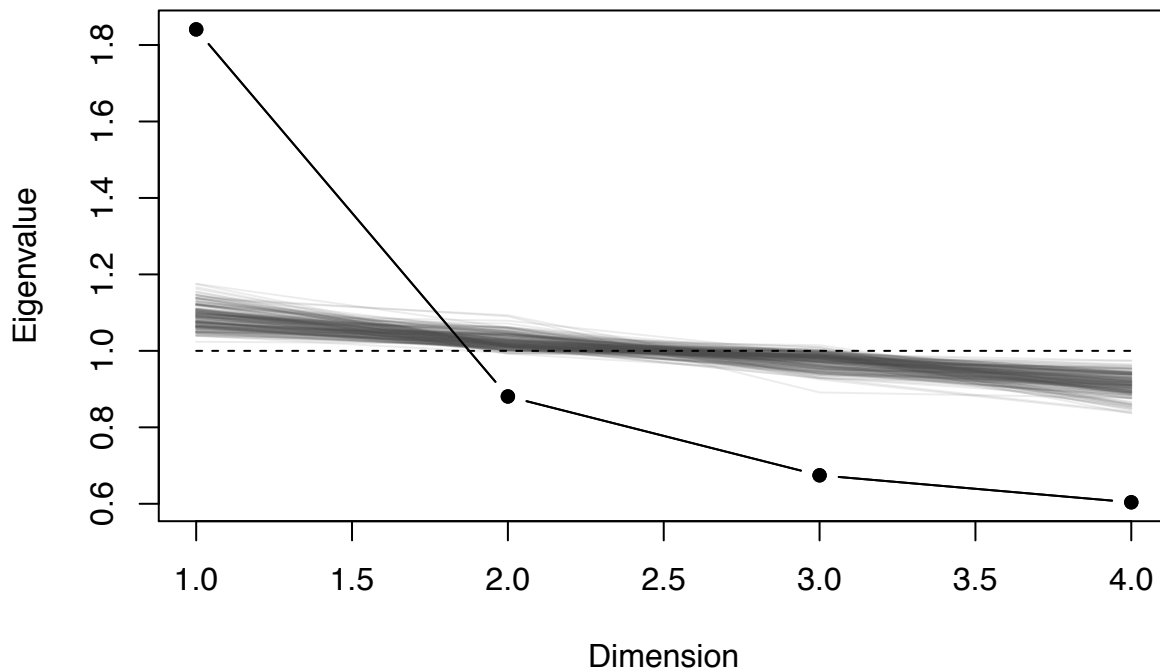

```
## [1] "Ratio of first to second eigenvalues: 2.09"  
## [1] 1.8408832 0.8807387 0.6744616 0.6039165  
## Factor Analysis using method = minres  
## Call: fa(r = grm_obj$X)  
## Standardized loadings (pattern matrix) based upon correlation matrix  
##      MR1  h2  u2 com  
## Q41  0.63 0.40 0.60  1  
## Q1   0.47 0.22 0.78  1  
## Q50 -0.50 0.25 0.75  1  
## Q89  0.51 0.26 0.74  1
```

```

##
##              MR1
## SS loadings   1.14
## Proportion Var 0.28
##
## Mean item complexity = 1
## Test of the hypothesis that 1 factor is sufficient.
##
## The degrees of freedom for the null model are 6 and the objective function was 0.41 with Chi Square
## The degrees of freedom for the model are 2 and the objective function was 0.03
##
## The root mean square of the residuals (RMSR) is 0.05
## The df corrected root mean square of the residuals is 0.09
##
## The harmonic number of observations is 600 with the empirical chi square 19.9 with prob < 4.8e-05
## The total number of observations was 619 with Likelihood Chi Square = 18.96 with prob < 7.6e-05
##
## Tucker Lewis Index of factoring reliability = 0.796
## RMSEA index = 0.117 and the 90 % confidence intervals are 0.073 0.168
## BIC = 6.1
## Fit based upon off diagonal values = 0.97
## Measures of factor score adequacy
##
##                                     MR1
## Correlation of (regression) scores with factors 0.79
## Multiple R square of scores with factors 0.62
## Minimum correlation of possible factor scores 0.24

```

#### Graded-Response Model: Attachment

| ##     | Extrmt1 | Extrmt2 | Extrmt3 | Extrmt4 | Extrmt5 | Extrmt6 | Dscrmn |
|--------|---------|---------|---------|---------|---------|---------|--------|
| ## Q41 | -2.521  | -1.489  | -0.855  | -0.270  | 0.270   | 0.920   | 1.659  |
| ## Q1  | -3.596  | -2.512  | -1.895  | -1.186  | -0.477  | 0.547   | 1.128  |
| ## Q50 | 3.150   | 1.824   | 0.999   | 0.230   | -0.497  | -1.300  | -1.030 |
| ## Q89 | -2.350  | -1.344  | -0.483  | 0.459   | 1.214   | 2.079   | 1.106  |

### Test Information Function

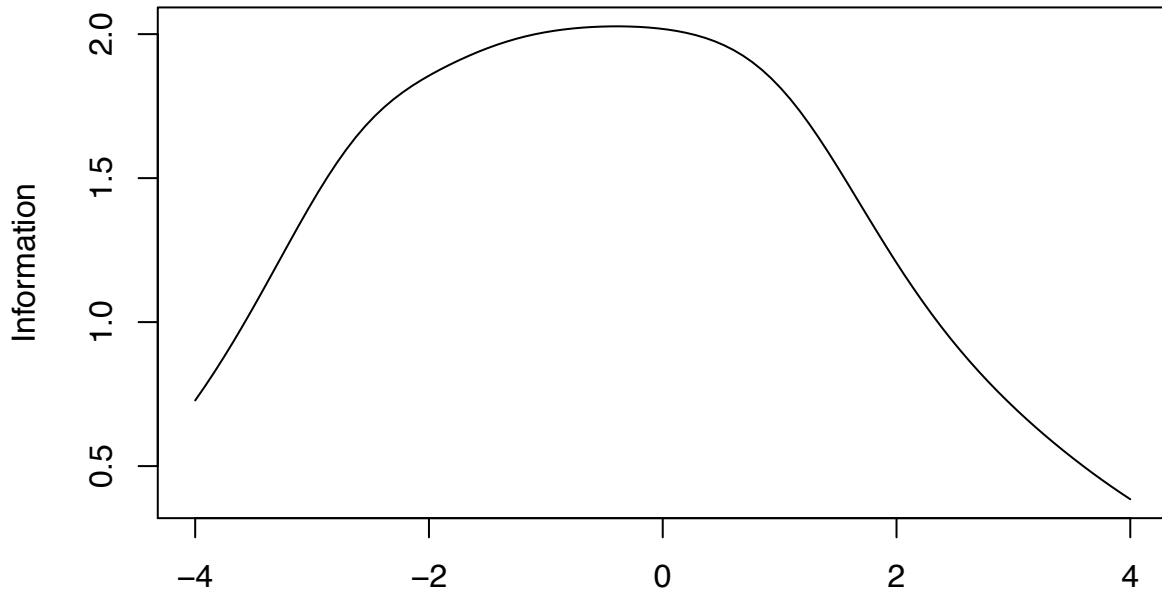

### Item Information Curves

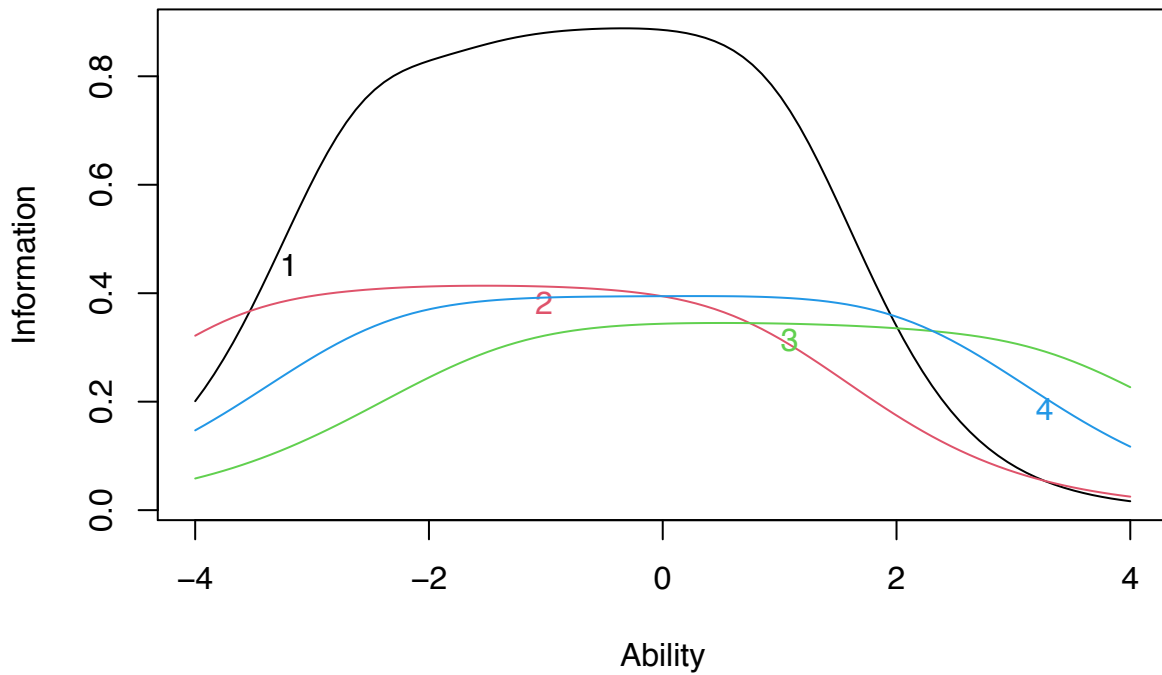

Gender-based DIF: Attachment

```
## Call:  
## lordif::lordif(resp.data = as.data.frame(sex.data), group = sex)
```

```
##
## Number of DIF groups: 2
##
## Number of items flagged for DIF: 2 of 4
##
## Items flagged: 2, 3
##
## Number of iterations for purification: 3 of 10
##
## Detection criterion: Chisqr
##
## Threshold: alpha = 0.01
##
## item ncat chi12 chi13 chi23
## 1 1 7 0.0406 0.1139 0.6945
## 2 2 7 0.0000 0.0000 0.8835
## 3 3 7 0.0697 0.0000 0.0000
## 4 4 7 0.5904 0.7356 0.5690
```

### Trait Distributions

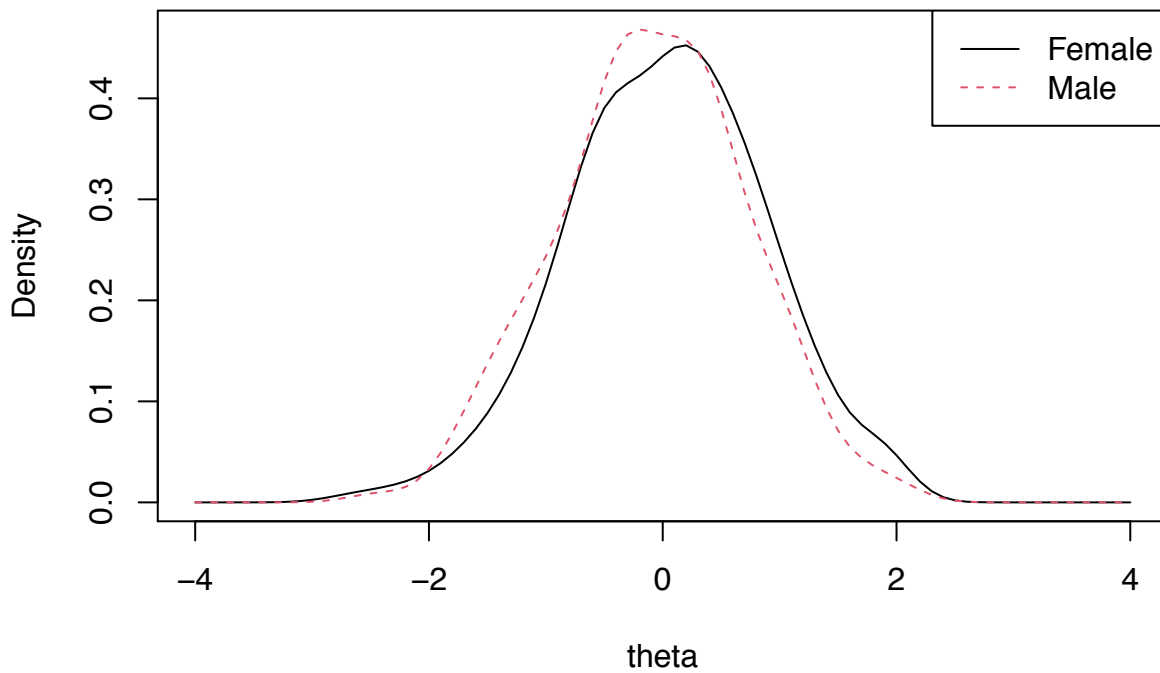

### Item True Score Functions – Item 2

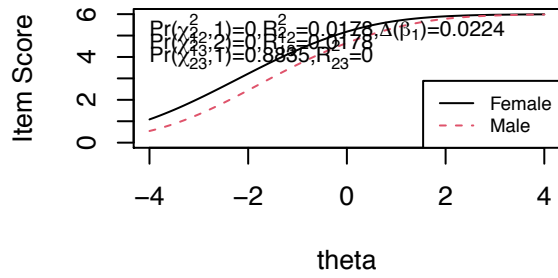

### Differences in Item True Score Function

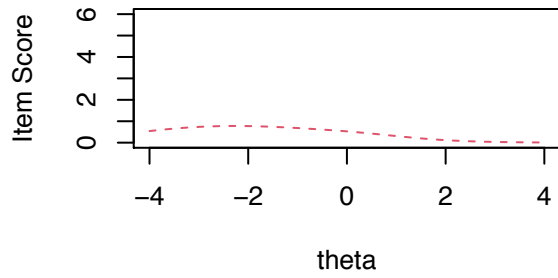

### Item Response Functions

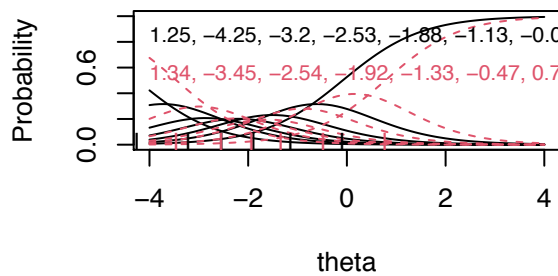

### Impact (Weighted by Density)

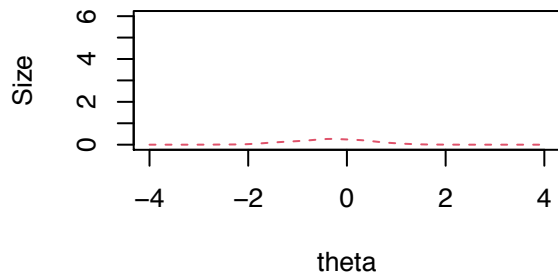

### Item True Score Functions – Item 3

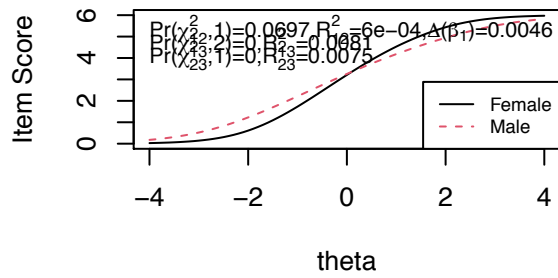

### Differences in Item True Score Function

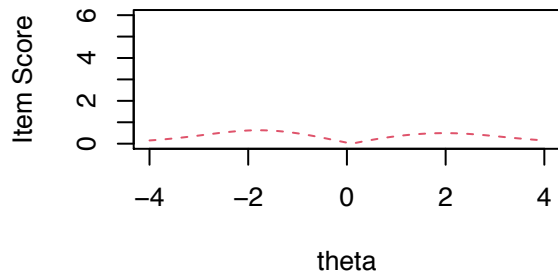

### Item Response Functions

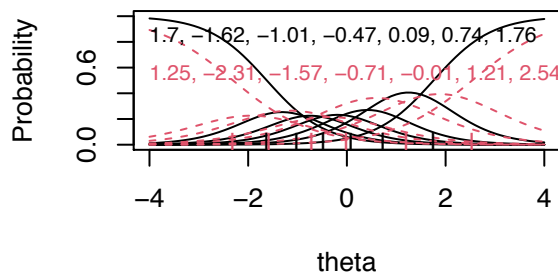

### Impact (Weighted by Density)

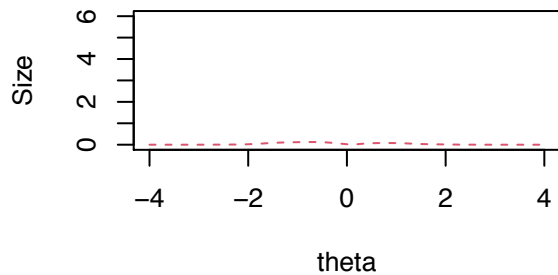

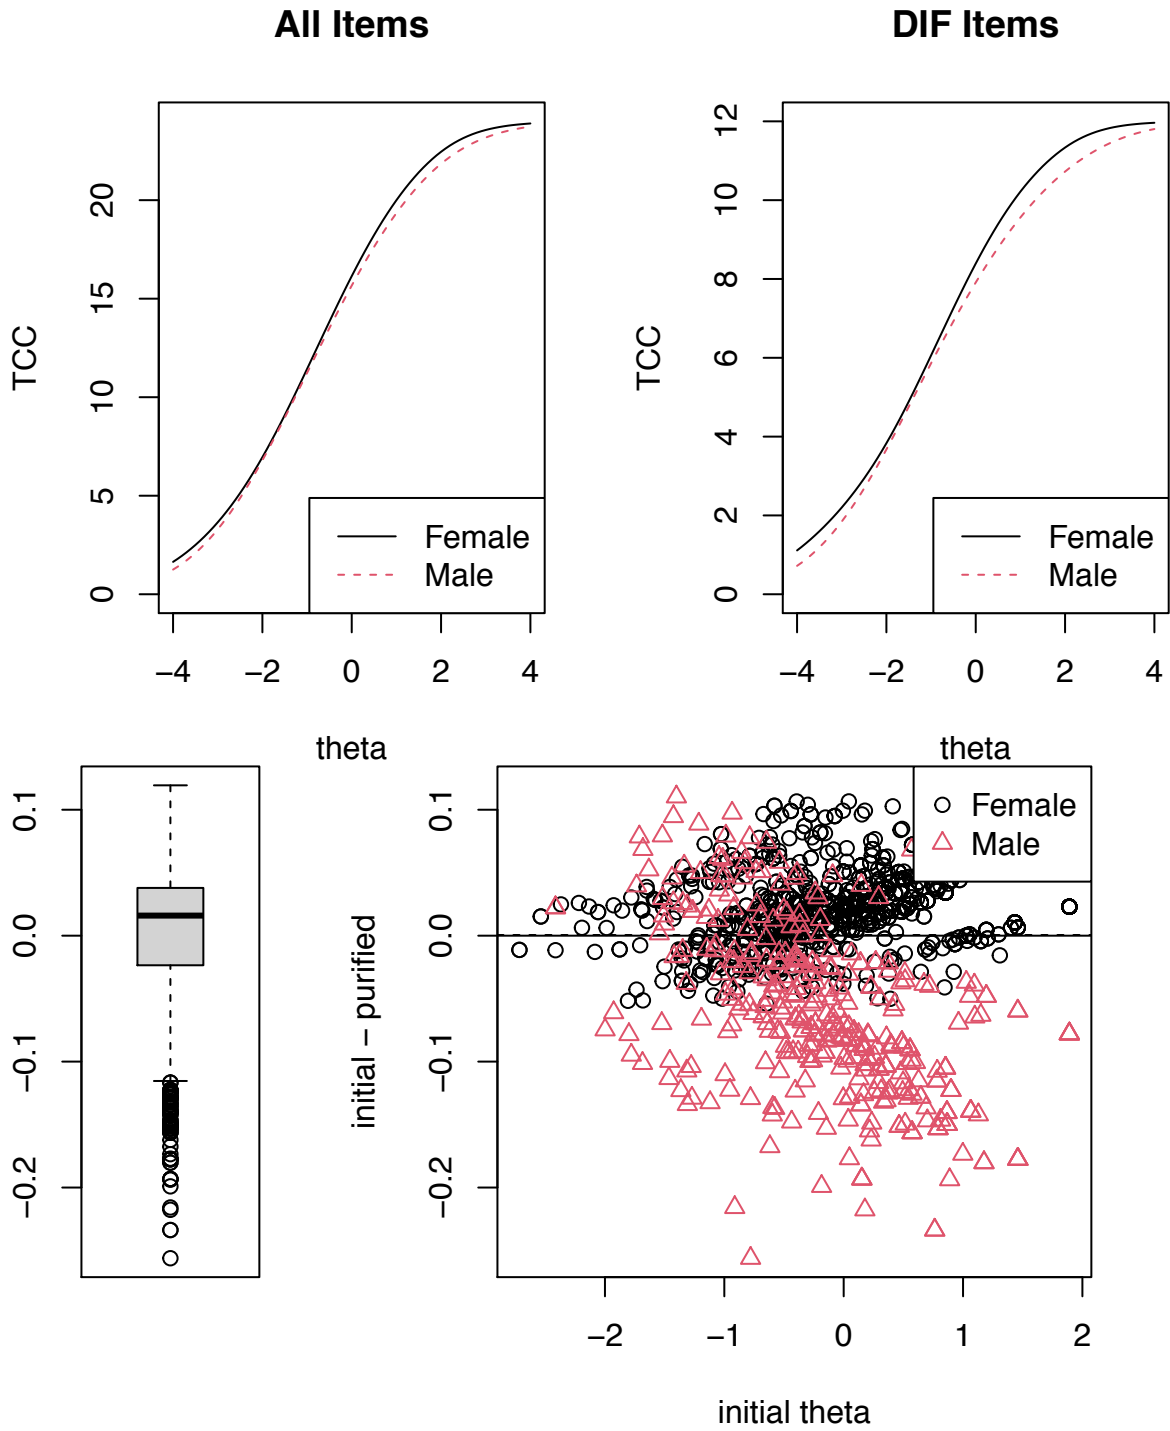

**Sample-based DIF: Attachment**

```
## Call:
## lordif::lordif(resp.data = as.data.frame(sample.data), group = clinYN)
##
## Number of DIF groups: 2
##
```

```

## Number of items flagged for DIF: 4 of 4
##
## Items flagged: 1, 2, 3, 4
##
## Number of iterations for purification: 2 of 10
##
## Detection criterion: Chisqr
##
## Threshold: alpha = 0.01
##
## item ncat chi12 chi13 chi23
## 1 1 7 0.0000 0.0000 0.0117
## 2 2 6 0.0179 0.0048 0.0241
## 3 3 7 0.0000 0.0000 0.0633
## 4 4 7 0.0000 0.0000 0.0627

```

Back to top

## Avoidance

### Reliability: Avoidance

```

## Cronbach's alpha is 0.663.
## Mean item-total correlation is 0.242.
## If each item were dropped:
## raw_alpha std.alpha G6(smc) average_r S/N alpha se var.r med.r
## Q78 0.61 0.60 0.59 0.23 1.5 0.024 0.026 0.21
## Q8 0.58 0.58 0.54 0.21 1.4 0.026 0.015 0.19
## Q10 0.69 0.69 0.66 0.31 2.2 0.019 0.012 0.31
## Q17 0.67 0.66 0.64 0.28 1.9 0.021 0.020 0.30
## Q34 0.58 0.57 0.55 0.21 1.3 0.027 0.021 0.19
## Q64 0.58 0.57 0.55 0.21 1.3 0.026 0.018 0.20

```



Unidimensionality: Avoidance

### Scree Plot

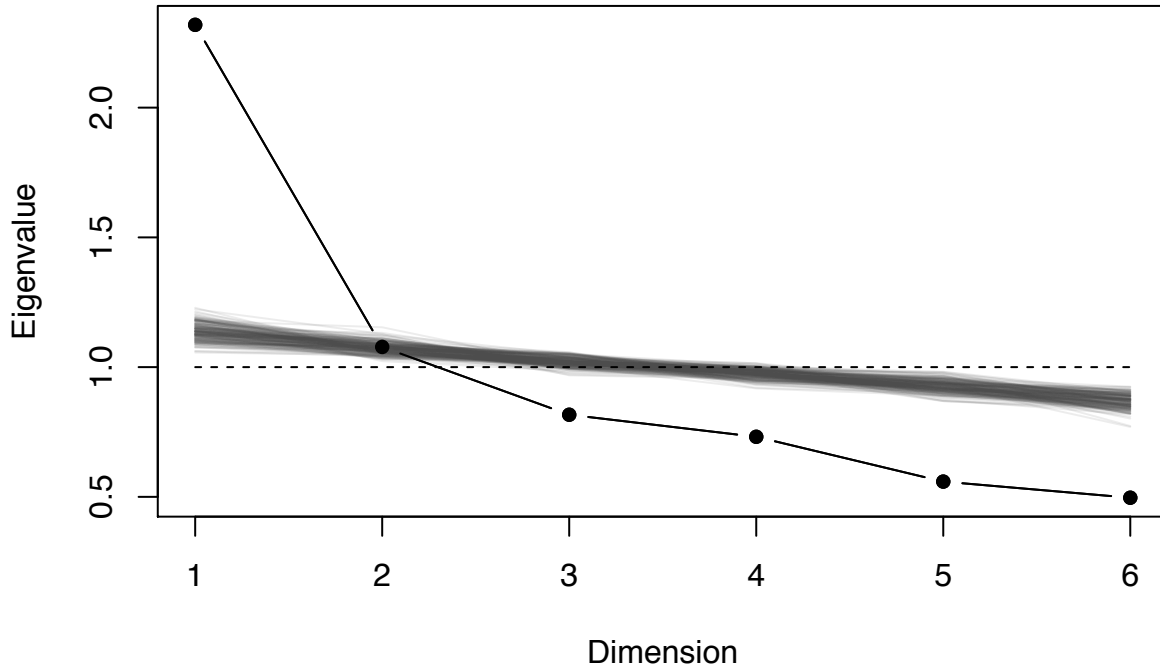

```
## [1] "Ratio of first to second eigenvalues: 2.152"  
## [1] 2.3191260 1.0777077 0.8164151 0.7313954 0.5587366 0.4966192  
## Factor Analysis using method = minres  
## Call: fa(r = grm_obj$X)  
## Standardized loadings (pattern matrix) based upon correlation matrix  
##      MR1    h2    u2 com  
## Q78 0.51 0.265 0.74  1  
## Q8  0.65 0.422 0.58  1  
## Q10 0.20 0.041 0.96  1  
## Q17 0.33 0.108 0.89  1  
## Q34 0.64 0.404 0.60  1  
## Q64 0.66 0.438 0.56  1  
##  
##              MR1  
## SS loadings  1.68  
## Proportion Var 0.28  
##  
## Mean item complexity = 1  
## Test of the hypothesis that 1 factor is sufficient.  
##  
## The degrees of freedom for the null model are 15 and the objective function was 0.88 with Chi Squ  
## The degrees of freedom for the model are 9 and the objective function was 0.09  
##  
## The root mean square of the residuals (RMSR) is 0.06  
## The df corrected root mean square of the residuals is 0.07  
##
```

```

## The harmonic number of observations is 588 with the empirical chi square 56.01 with prob < 7.8e-
## The total number of observations was 619 with Likelihood Chi Square = 52.48 with prob < 3.7e-08
##
## Tucker Lewis Index of factoring reliability = 0.862
## RMSEA index = 0.088 and the 90 % confidence intervals are 0.066 0.112
## BIC = -5.37
## Fit based upon off diagonal values = 0.96
## Measures of factor score adequacy
##
## Correlation of (regression) scores with factors MR1 0.85
## Multiple R square of scores with factors 0.73
## Minimum correlation of possible factor scores 0.46

```

**Graded-Response Model: Avoidance**

| ##     | Extrmt1 | Extrmt2 | Extrmt3 | Extrmt4 | Extrmt5 | Extrmt6 | Dscrmn |
|--------|---------|---------|---------|---------|---------|---------|--------|
| ## Q78 | -1.691  | -1.103  | -0.620  | 0.011   | 0.690   | 1.603   | 1.204  |
| ## Q8  | -0.959  | -0.378  | 0.007   | 0.503   | 1.016   | 1.702   | 1.758  |
| ## Q10 | -4.307  | -2.102  | -0.561  | 1.571   | 3.157   | 5.490   | 0.426  |
| ## Q17 | 0.239   | 1.113   | 1.539   | 2.111   | 2.758   | 3.607   | 0.793  |
| ## Q34 | -1.558  | -0.925  | -0.518  | -0.044  | 0.536   | 1.156   | 1.684  |
| ## Q64 | -1.162  | -0.468  | 0.014   | 0.598   | 1.076   | 1.768   | 1.722  |

**Test Information Function**

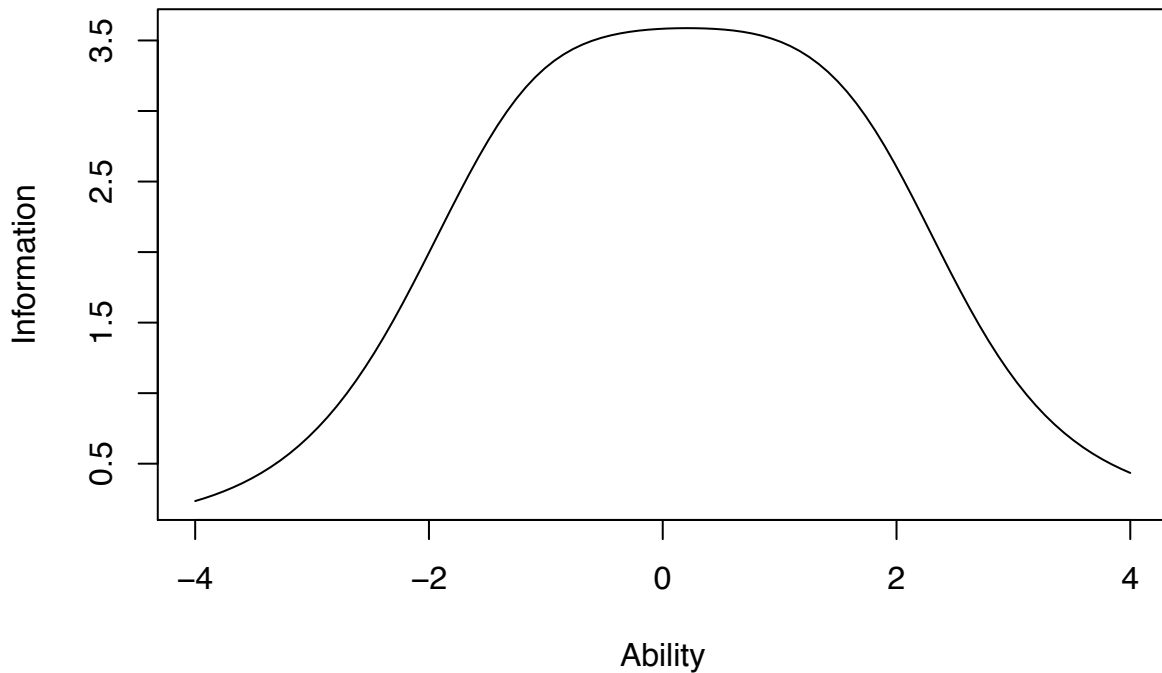

## Item Information Curves

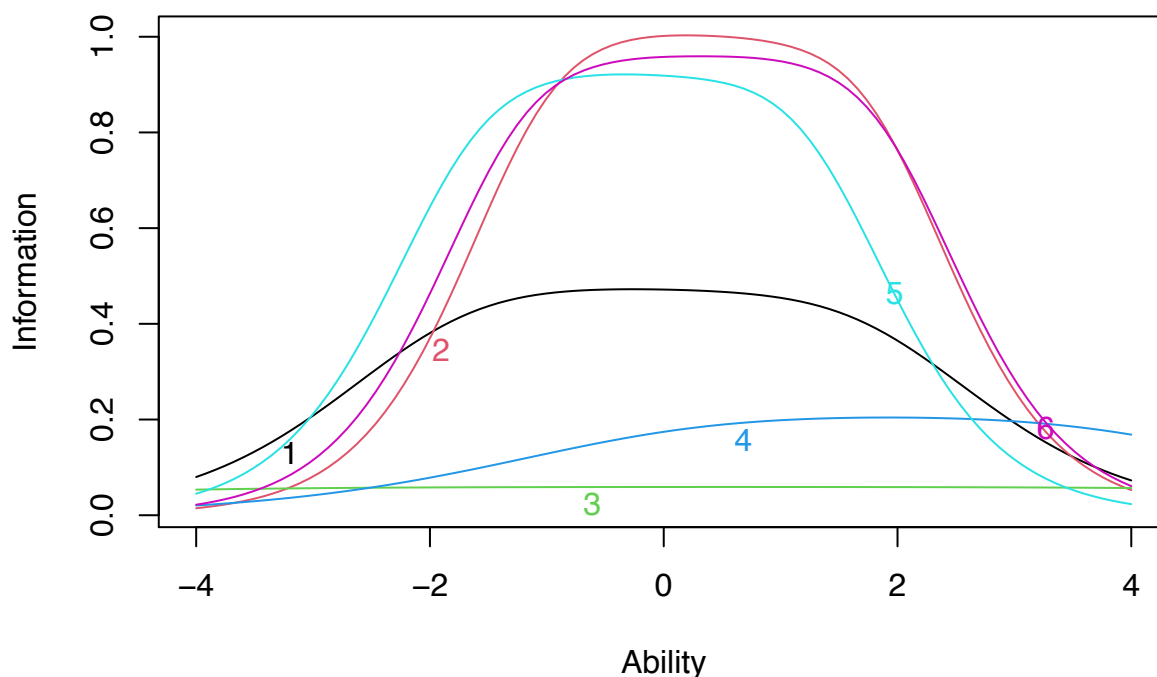

### Gender-based DIF: Avoidance

```
## Call:
## lordif::lordif(resp.data = as.data.frame(sex.data), group = sex)
##
## Number of DIF groups: 2
##
## Number of items flagged for DIF: 3 of 6
##
## Items flagged: 4, 5, 6
##
## Number of iterations for purification: 2 of 10
##
## Detection criterion: Chisqr
##
## Threshold: alpha = 0.01
##
## item ncat chi12 chi13 chi23
## 1 1 7 0.5349 0.8207 0.9195
## 2 2 7 0.2344 0.4385 0.6278
## 3 3 7 0.0718 0.1315 0.3664
## 4 4 7 0.0039 0.0157 0.9387
## 5 5 7 0.0306 0.0005 0.0012
## 6 6 7 0.0002 0.0001 0.0636
```

### Trait Distributions

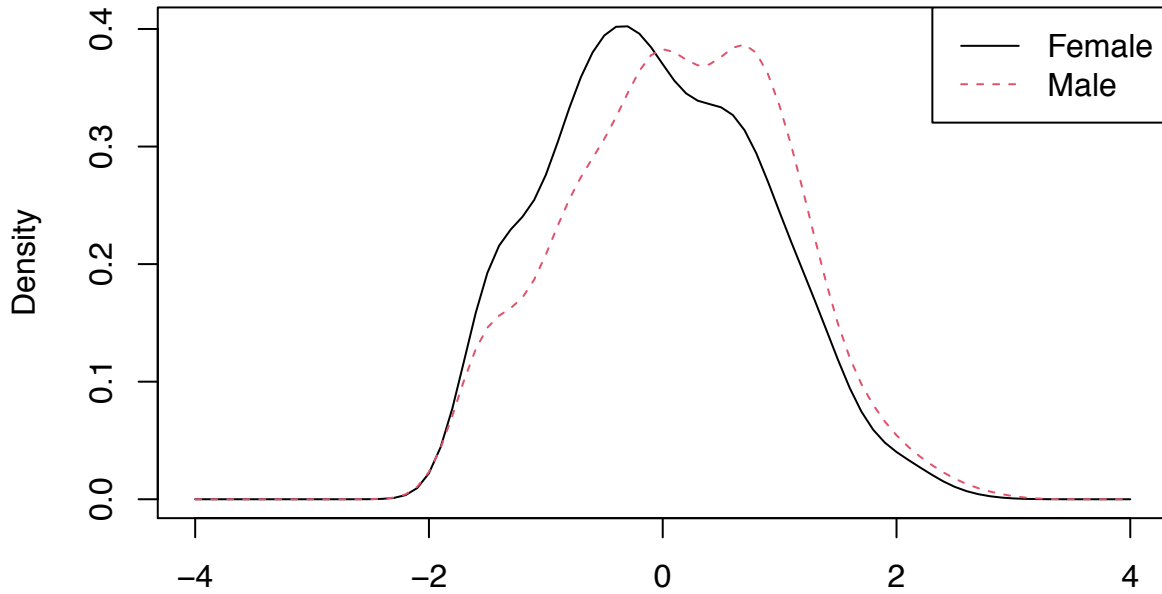

### Item True Score Functions – Item 4 Differences in Item True Score Function

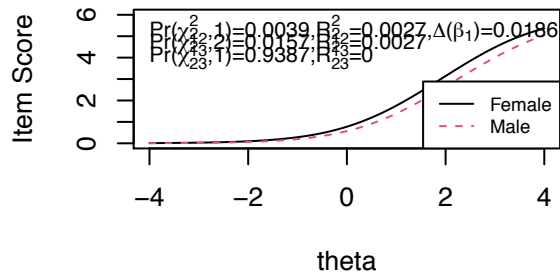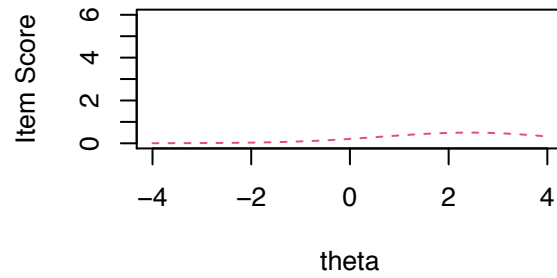

### Item Response Functions

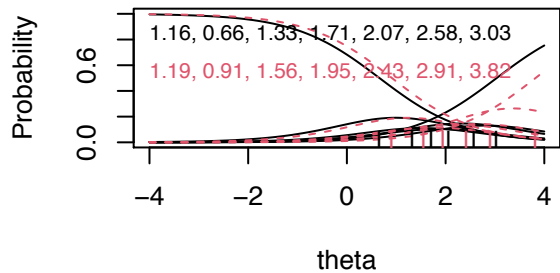

### Impact (Weighted by Density)

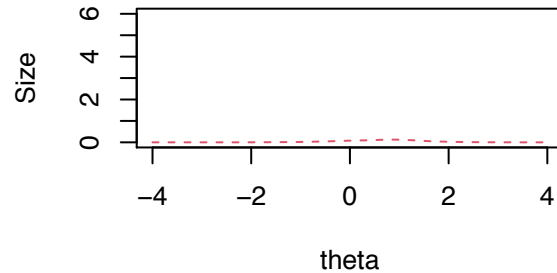

### Item True Score Functions – Item 5

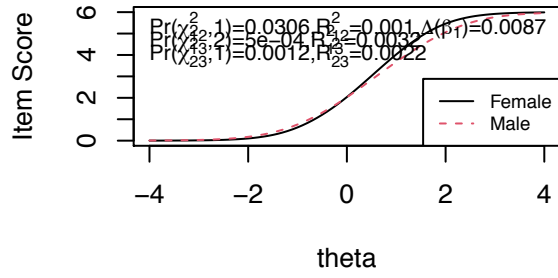

### Differences in Item True Score Function

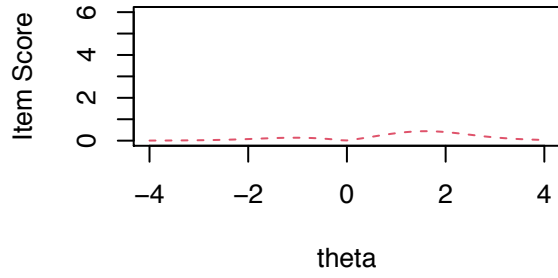

### Item Response Functions

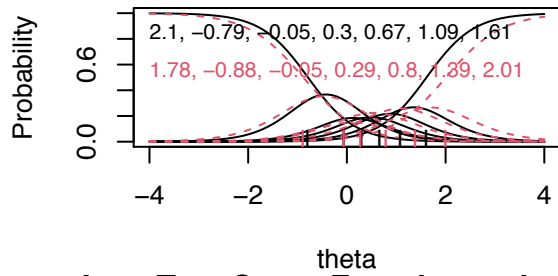

### Impact (Weighted by Density)

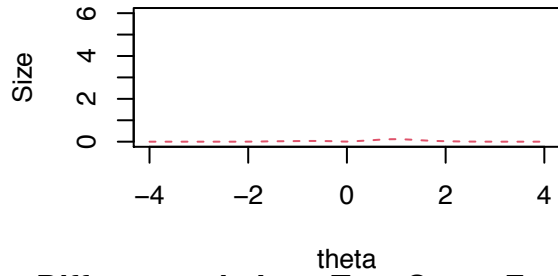

### Item True Score Functions – Item 6

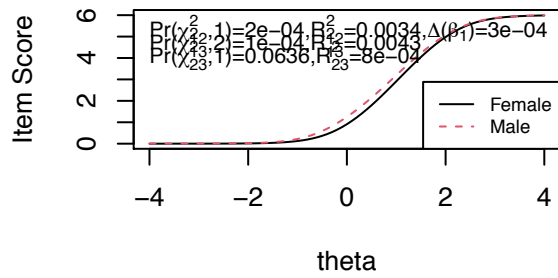

### Differences in Item True Score Function

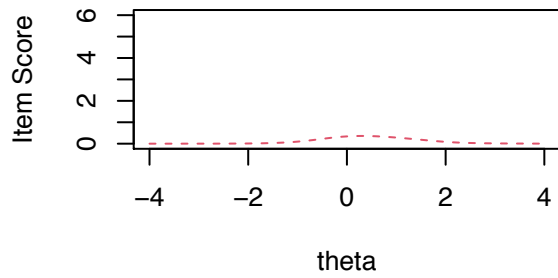

### Item Response Functions

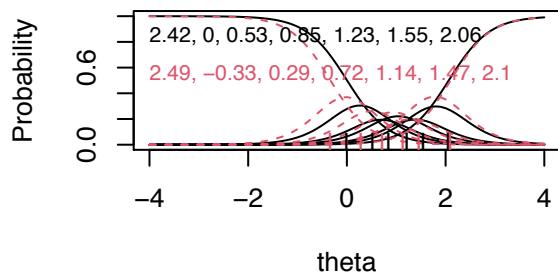

### Impact (Weighted by Density)

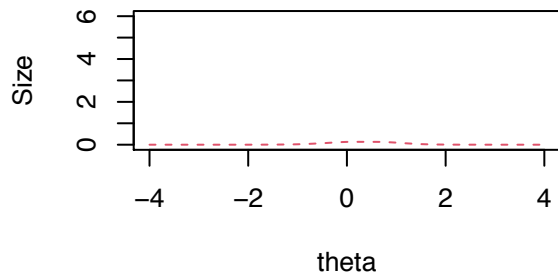

All Items

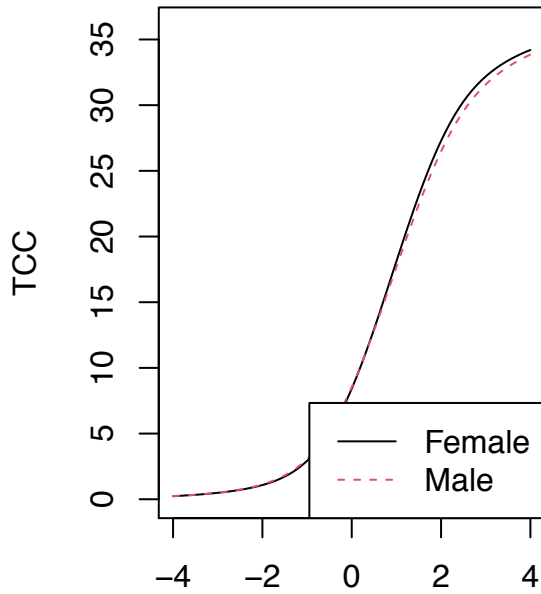

DIF Items

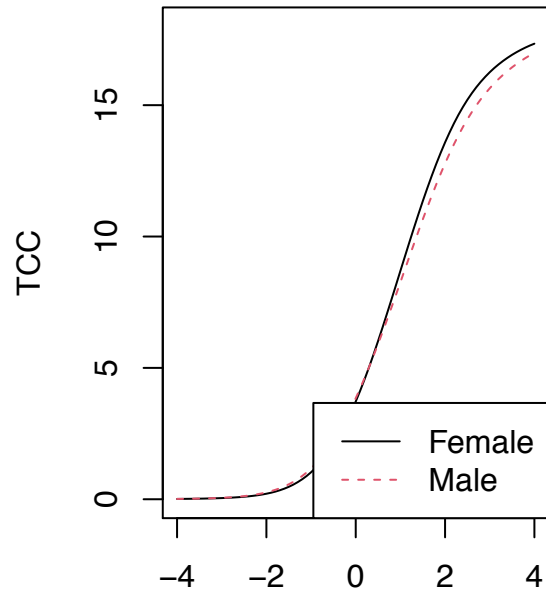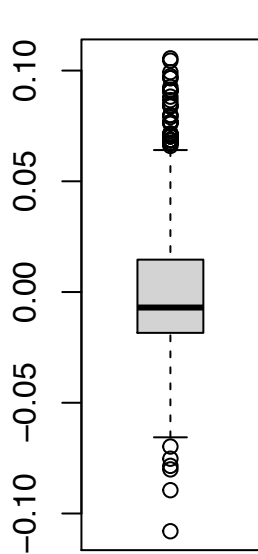

theta

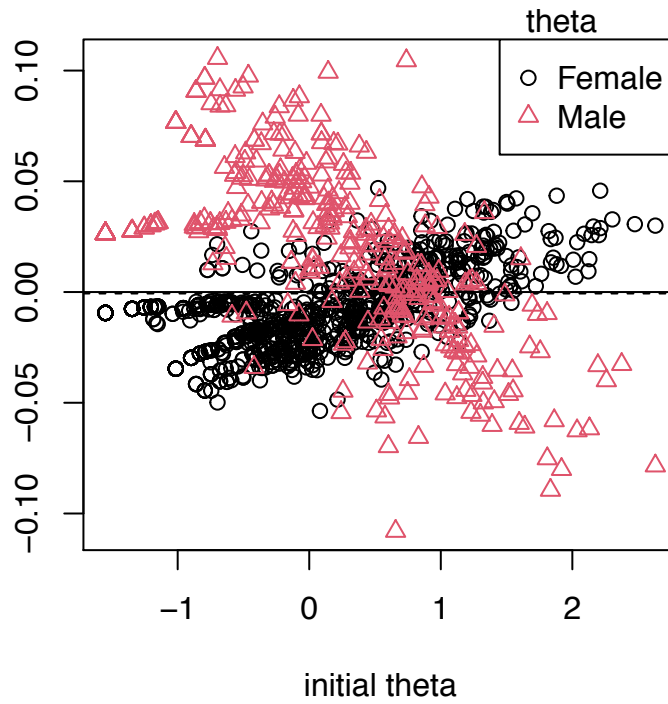

Sample-based DIF: Avoidance

```
## Call:
## lordif::lordif(resp.data = as.data.frame(sample.data), group = clinYN)
##
## Number of DIF groups: 2
##
```

```

## Number of items flagged for DIF: 6 of 6
##
## Items flagged: 1, 2, 3, 4, 5, 6
##
## Number of iterations for purification: 2 of 10
##
## Detection criterion: Chisqr
##
## Threshold: alpha = 0.01
##
## item ncat chi12 chi13 chi23
## 1 1 7 0.0000 0e+00 0.0001
## 2 2 7 0.0000 0e+00 0.8427
## 3 3 7 0.0000 0e+00 0.8806
## 4 4 7 0.0214 1e-04 0.0004
## 5 5 7 0.0000 0e+00 0.0001
## 6 6 6 0.0000 0e+00 0.8568

```

Back to top

## Connectedness

### Reliability: Connectedness

```

## Cronbach's alpha is 0.71.
## Mean item-total correlation is 0.263.
## If each item were dropped:
##      raw_alpha std.alpha G6(smc) average_r S/N alpha se var.r med.r
## Q43-    0.66    0.67    0.65    0.25 2.0    0.021 0.0095 0.23
## Q45    0.72    0.72    0.71    0.30 2.6    0.017 0.0104 0.29
## Q50-    0.68    0.68    0.67    0.26 2.1    0.020 0.0135 0.23
## Q54    0.70    0.70    0.68    0.28 2.4    0.019 0.0112 0.28
## Q62    0.65    0.66    0.64    0.24 1.9    0.022 0.0097 0.23
## Q69    0.66    0.67    0.65    0.25 2.0    0.021 0.0140 0.21
## Q80    0.67    0.68    0.66    0.26 2.1    0.020 0.0138 0.21

```

Unidimensionality: Connectedness

### Scree Plot

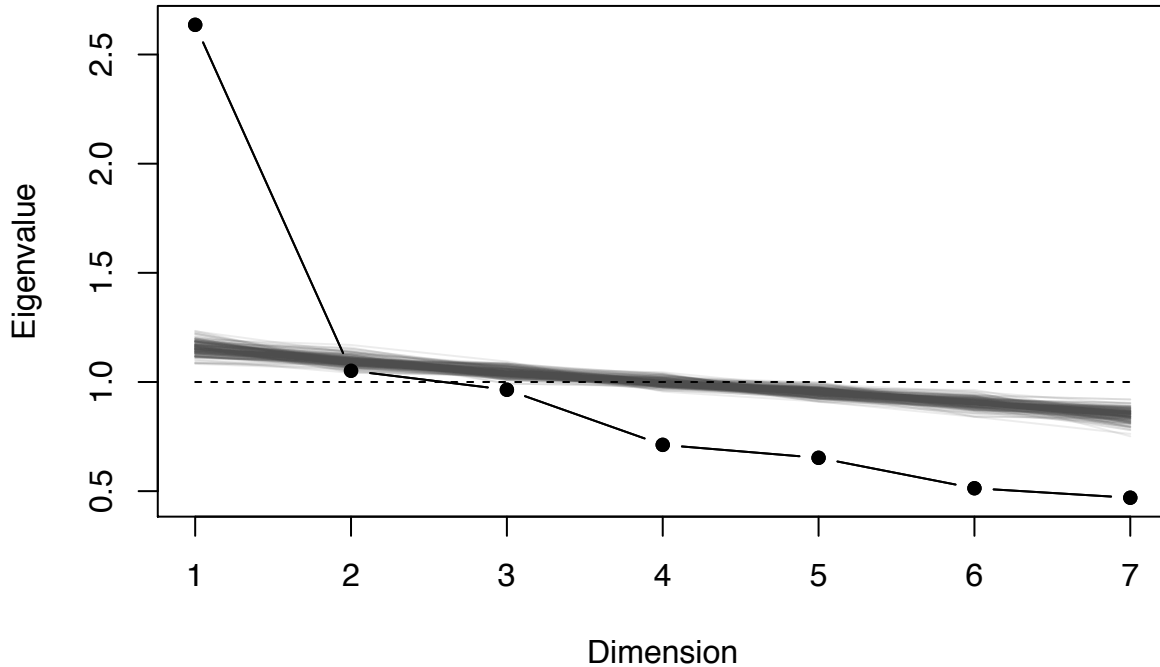

```
## [1] "Ratio of first to second eigenvalues: 2.506"  
## [1] 2.6359076 1.0516989 0.9643826 0.7120680 0.6526773 0.5133448 0.4699208  
## Factor Analysis using method = minres  
## Call: fa(r = grm_obj$X)  
## Standardized loadings (pattern matrix) based upon correlation matrix  
##      MR1    h2    u2 com  
## Q43 -0.62 0.385 0.61  1  
## Q45  0.30 0.092 0.91  1  
## Q50 -0.53 0.284 0.72  1  
## Q54  0.39 0.151 0.85  1  
## Q62  0.66 0.437 0.56  1  
## Q69  0.56 0.314 0.69  1  
## Q80  0.54 0.292 0.71  1  
##  
##              MR1  
## SS loadings  1.96  
## Proportion Var 0.28  
##  
## Mean item complexity = 1  
## Test of the hypothesis that 1 factor is sufficient.  
##  
## The degrees of freedom for the null model are 21 and the objective function was 1.2 with Chi Squar  
## The degrees of freedom for the model are 14 and the objective function was 0.2  
##  
## The root mean square of the residuals (RMSR) is 0.07  
## The df corrected root mean square of the residuals is 0.09
```



```

##
## The harmonic number of observations is 570 with the empirical chi square 122.58 with prob < 2e-1
## The total number of observations was 619 with Likelihood Chi Square = 121.65 with prob < 3e-19
##
## Tucker Lewis Index of factoring reliability = 0.775
## RMSEA index = 0.111 and the 90 % confidence intervals are 0.094 0.13
## BIC = 31.66
## Fit based upon off diagonal values = 0.94
## Measures of factor score adequacy
##
## Correlation of (regression) scores with factors MR1 0.86
## Multiple R square of scores with factors 0.75
## Minimum correlation of possible factor scores 0.49

```

**Graded-Response Model: Connectedness**

| ##     | Extrmt1 | Extrmt2 | Extrmt3 | Extrmt4 | Extrmt5 | Extrmt6 | Dscrmn |
|--------|---------|---------|---------|---------|---------|---------|--------|
| ## Q43 | -1.674  | -1.011  | -0.456  | 0.110   | 0.606   | 1.500   | 1.618  |
| ## Q45 | 2.043   | 0.908   | 0.269   | -0.914  | -1.641  | -2.948  | -0.593 |
| ## Q50 | -2.858  | -1.662  | -0.909  | -0.208  | 0.457   | 1.184   | 1.189  |
| ## Q54 | 3.218   | 1.807   | 0.873   | -0.063  | -0.955  | -1.899  | -0.750 |
| ## Q62 | 1.825   | 1.107   | 0.628   | 0.222   | -0.209  | -0.857  | -1.851 |
| ## Q69 | 1.771   | 1.017   | 0.422   | -0.344  | -0.850  | -1.550  | -1.191 |
| ## Q80 | 3.328   | 2.116   | 1.632   | 0.945   | 0.281   | -0.498  | -1.309 |

**Test Information Function**

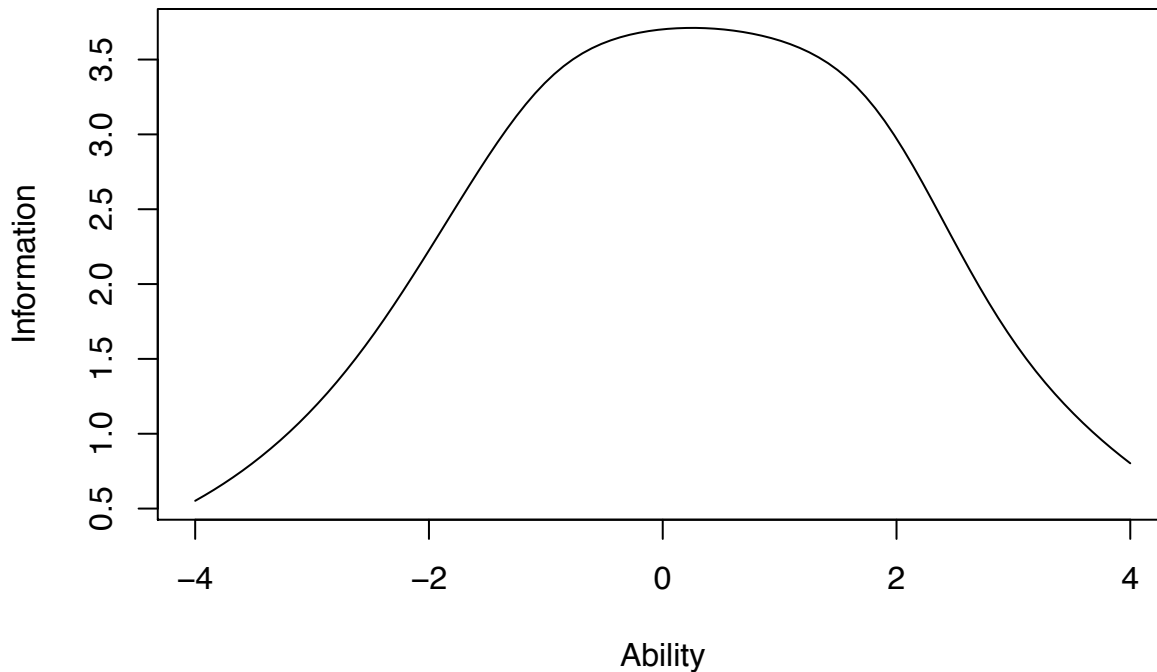

## Item Information Curves

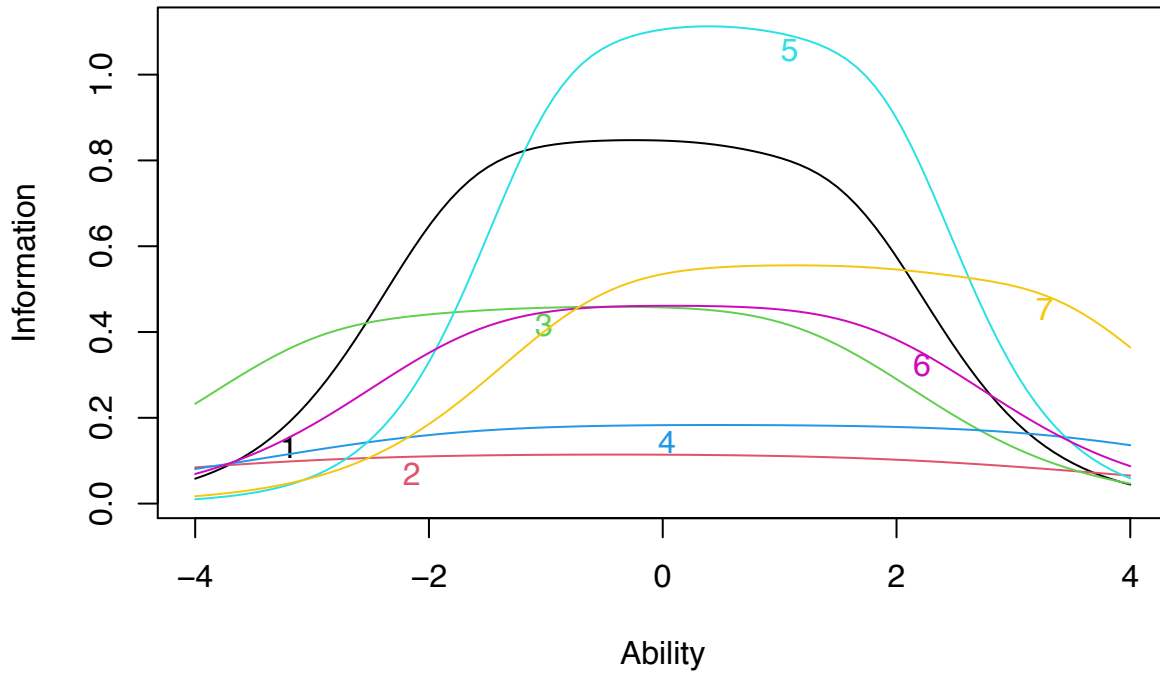

### Gender-based DIF: Connectedness

```
## Call:
## lordif::lordif(resp.data = as.data.frame(sex.data), group = sex)
##
##   Number of DIF groups: 2
##
##   Number of items flagged for DIF: 3 of 7
##
##   Items flagged: 2, 5, 7
##
##   Number of iterations for purification: 4 of 10
##
##   Detection criterion: Chisqr
##
##   Threshold: alpha = 0.01
##
##   item ncat  chi12  chi13  chi23
## 1     1     7 0.0484 0.0636 0.2042
## 2     2     7 0.0002 0.0000 0.0012
## 3     3     7 0.0845 0.0774 0.1434
## 4     4     7 0.2402 0.2957 0.3039
## 5     5     7 0.0000 0.0000 0.0449
## 6     6     7 0.6212 0.8710 0.8580
## 7     7     7 0.0000 0.0001 0.7625
```

## Trait Distributions

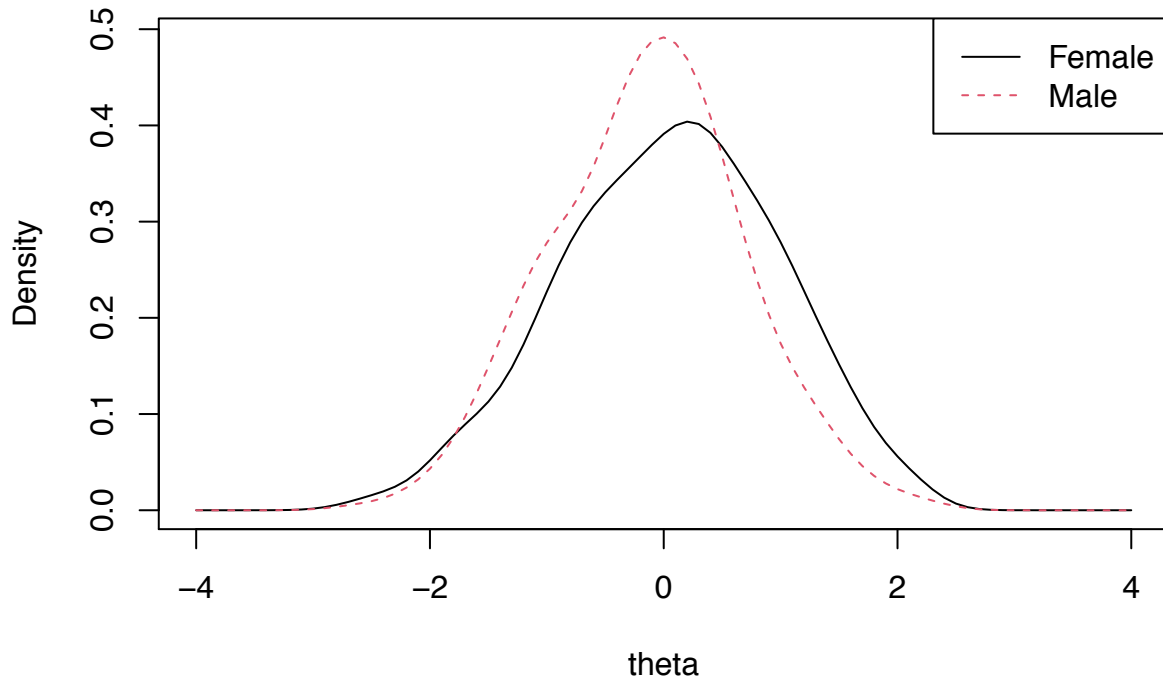

### Item True Score Functions – Item 2

### Differences in Item True Score Function

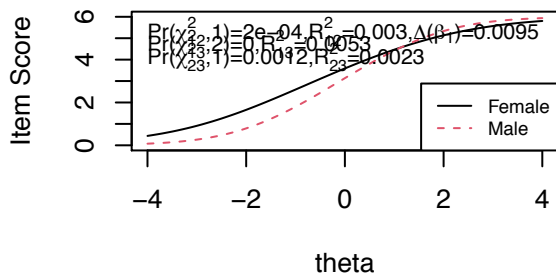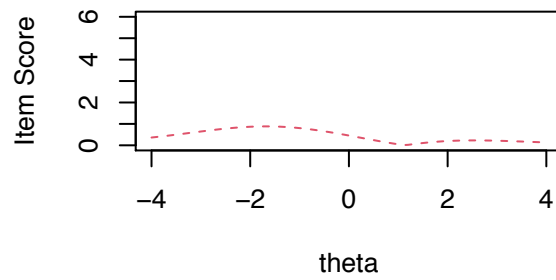

### Item Response Functions

### Impact (Weighted by Density)

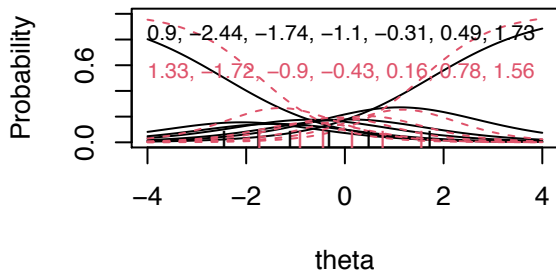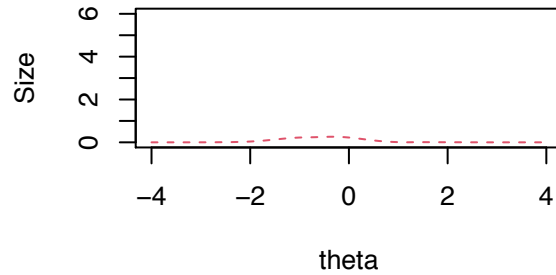

### Item True Score Functions – Item 5

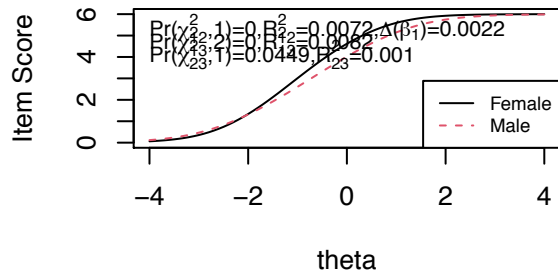

### Differences in Item True Score Function

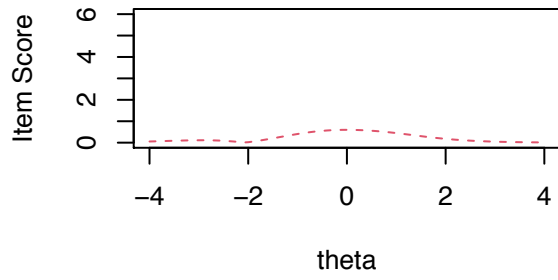

### Item Response Functions

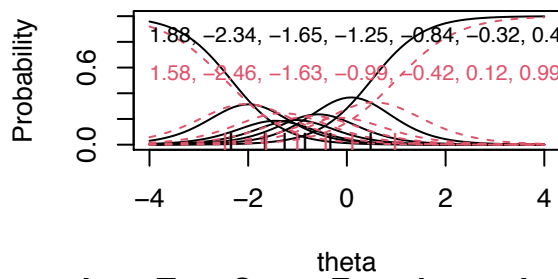

### Impact (Weighted by Density)

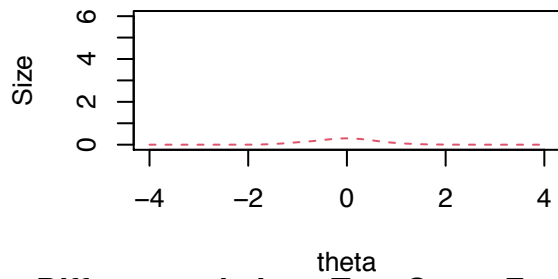

### Item True Score Functions – Item 7

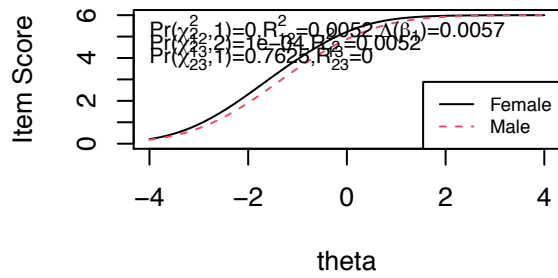

### Differences in Item True Score Function

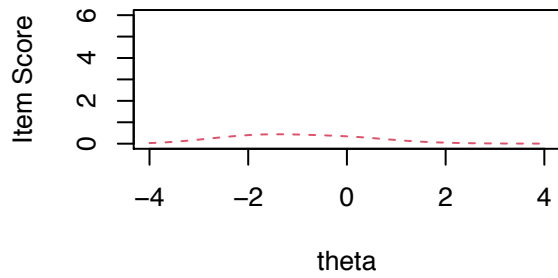

### Item Response Functions

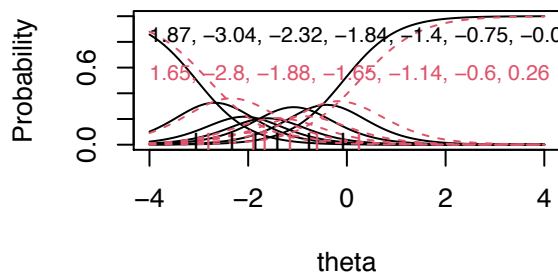

### Impact (Weighted by Density)

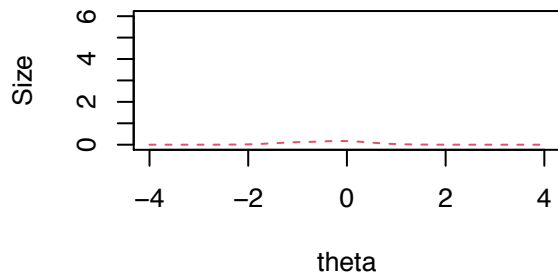

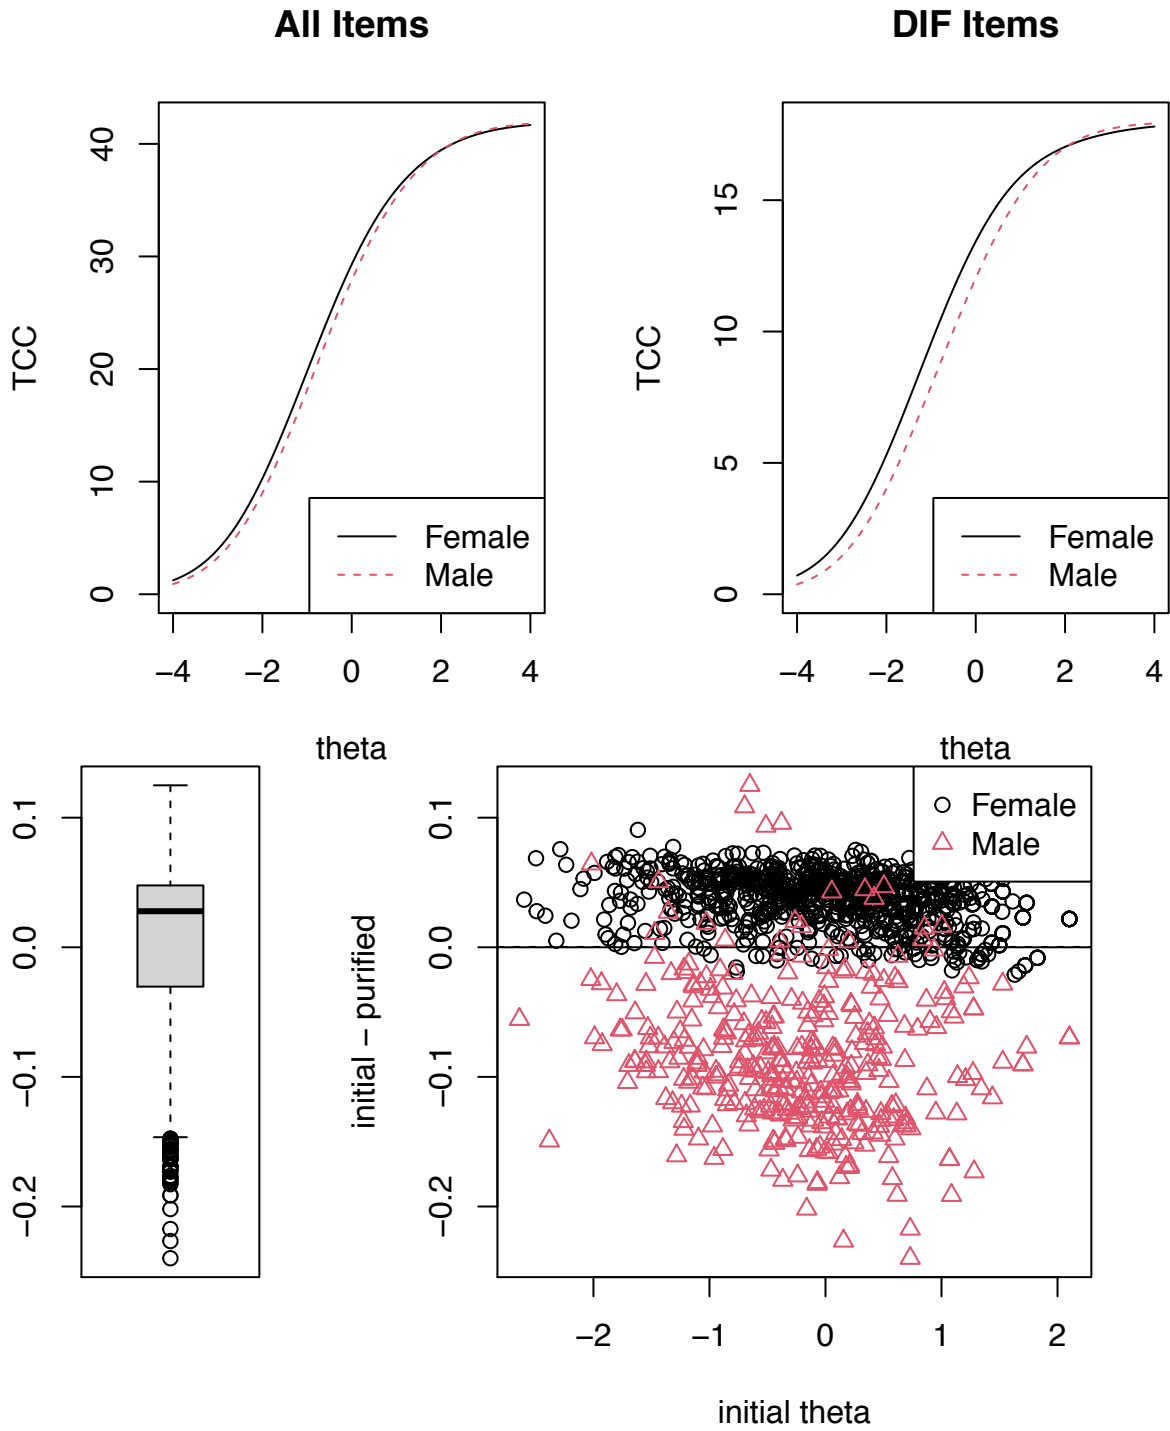

**Sample-based DIF: Connectedness**

```
## Call:
## lordif::lordif(resp.data = as.data.frame(sample.data), group = clinYN)
##
## Number of DIF groups: 2
##
```

```

## Number of items flagged for DIF: 7 of 7
##
## Items flagged: 1, 2, 3, 4, 5, 6, 7
##
## Number of iterations for purification: 2 of 10
##
## Detection criterion: Chisqr
##
## Threshold: alpha = 0.01
##
## item ncat chi12 chi13 chi23
## 1 1 7 0 0 0.0006
## 2 2 7 0 0 0.9808
## 3 3 7 0 0 0.0019
## 4 4 7 0 0 0.0275
## 5 5 7 0 0 0.0012
## 6 6 7 0 0 0.6404
## 7 7 7 0 0 0.0000

```

Back to top

## Demoralization

### Reliability: Demoralization

```

## Cronbach's alpha is 0.799.
## Mean item-total correlation is 0.441.
## If each item were dropped:
## raw_alpha std.alpha G6(smc) average_r S/N alpha se var.r med.r
## Q88 0.75 0.75 0.70 0.42 2.9 0.016 0.0108 0.41
## Q24 0.73 0.73 0.68 0.41 2.7 0.017 0.0071 0.39
## Q36 0.80 0.81 0.76 0.51 4.1 0.013 0.0026 0.51
## Q42 0.75 0.74 0.70 0.42 2.9 0.016 0.0081 0.39
## Q61 0.76 0.76 0.72 0.44 3.2 0.015 0.0137 0.44

```

Unidimensionality: Demoralization

### Scree Plot

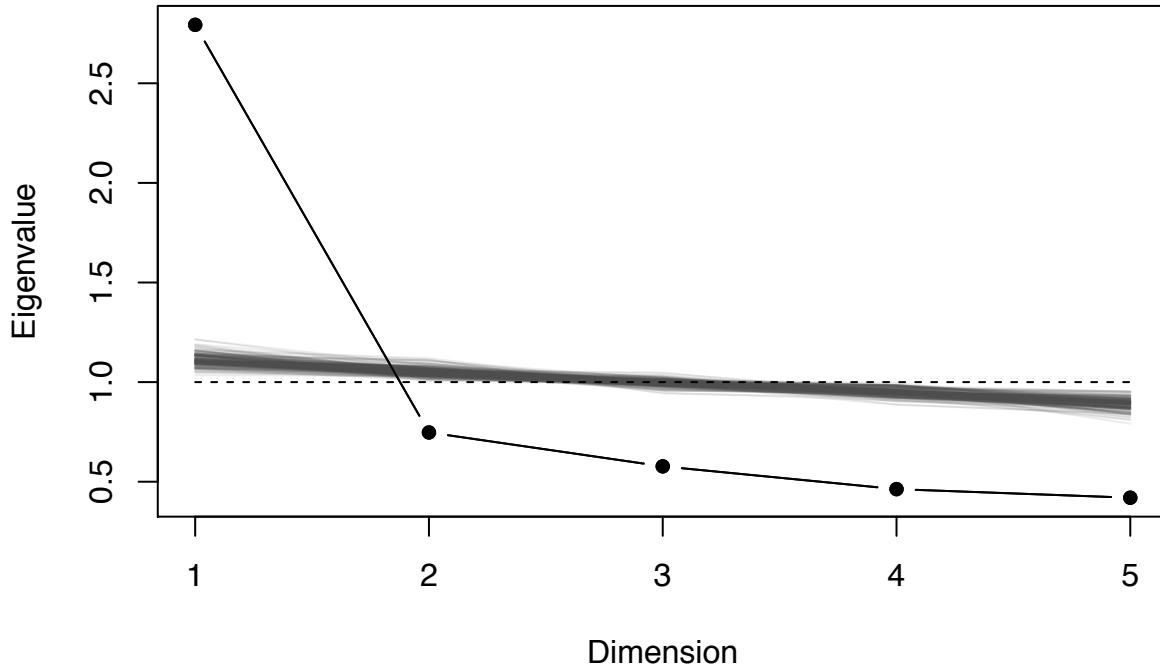

```
## [1] "Ratio of first to second eigenvalues: 3.739"  
## [1] 2.7934518 0.7472057 0.5770869 0.4626998 0.4195558  
## Factor Analysis using method = minres  
## Call: fa(r = grm_obj$X)  
## Standardized loadings (pattern matrix) based upon correlation matrix  
##      MR1  h2  u2 com  
## Q88 0.71 0.51 0.49  1  
## Q24 0.78 0.60 0.40  1  
## Q36 0.48 0.23 0.77  1  
## Q42 0.72 0.52 0.48  1  
## Q61 0.65 0.42 0.58  1  
##  
##              MR1  
## SS loadings  2.28  
## Proportion Var 0.46  
##  
## Mean item complexity = 1  
## Test of the hypothesis that 1 factor is sufficient.  
##  
## The degrees of freedom for the null model are 10 and the objective function was 1.45 with Chi Squ  
## The degrees of freedom for the model are 5 and the objective function was 0.01  
##  
## The root mean square of the residuals (RMSR) is 0.02  
## The df corrected root mean square of the residuals is 0.03  
##  
## The harmonic number of observations is 598 with the empirical chi square 4.45 with prob < 0.49
```

```

## The total number of observations was 619 with Likelihood Chi Square = 6.66 with prob < 0.25
##
## Tucker Lewis Index of factoring reliability = 0.996
## RMSEA index = 0.023 and the 90 % confidence intervals are 0 0.064
## BIC = -25.48
## Fit based upon off diagonal values = 1
## Measures of factor score adequacy
##
##                                     MR1
## Correlation of (regression) scores with factors 0.91
## Multiple R square of scores with factors 0.82
## Minimum correlation of possible factor scores 0.65

```

**Graded-Response Model: Demoralization**

| ##     | Extrmt1 | Extrmt2 | Extrmt3 | Extrmt4 | Extrmt5 | Extrmt6 | Dscrmn |
|--------|---------|---------|---------|---------|---------|---------|--------|
| ## Q88 | -1.045  | -0.594  | -0.253  | 0.150   | 0.592   | 1.028   | 1.991  |
| ## Q24 | -1.091  | -0.472  | -0.030  | 0.406   | 0.874   | 1.476   | 2.439  |
| ## Q36 | -0.399  | 0.406   | 0.937   | 1.660   | 2.416   | 3.251   | 1.116  |
| ## Q42 | -1.555  | -0.860  | -0.439  | -0.039  | 0.495   | 1.099   | 2.046  |
| ## Q61 | -0.376  | 0.164   | 0.640   | 1.168   | 1.754   | 2.268   | 1.890  |

**Test Information Function**

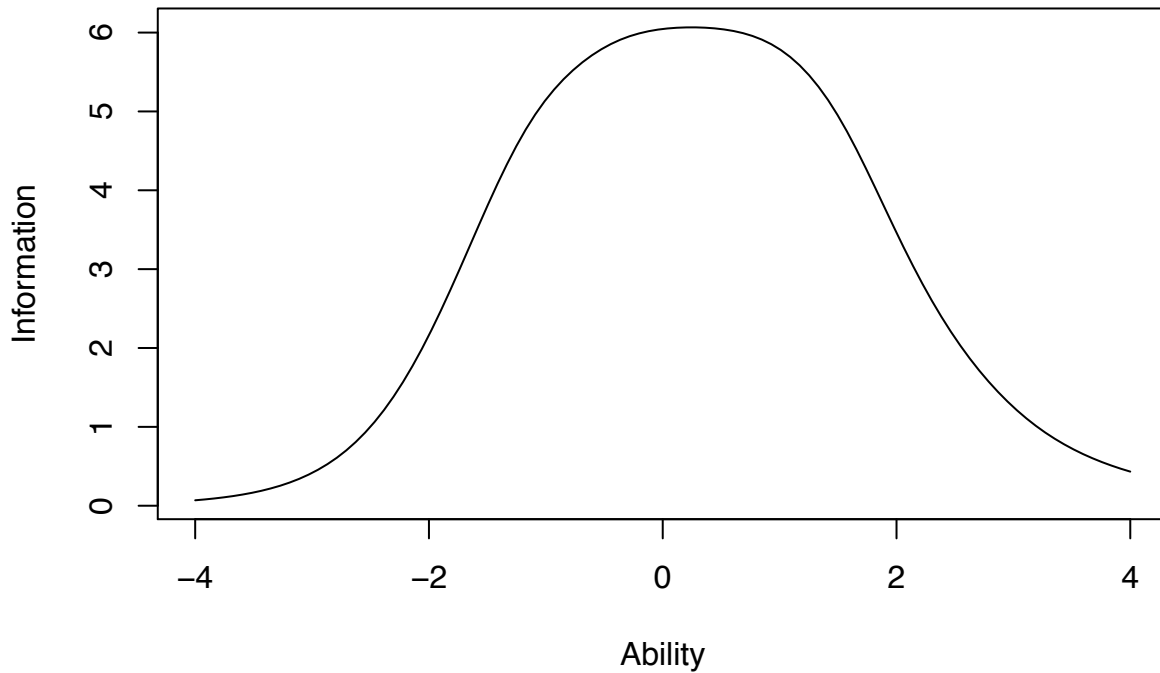



## Item Information Curves

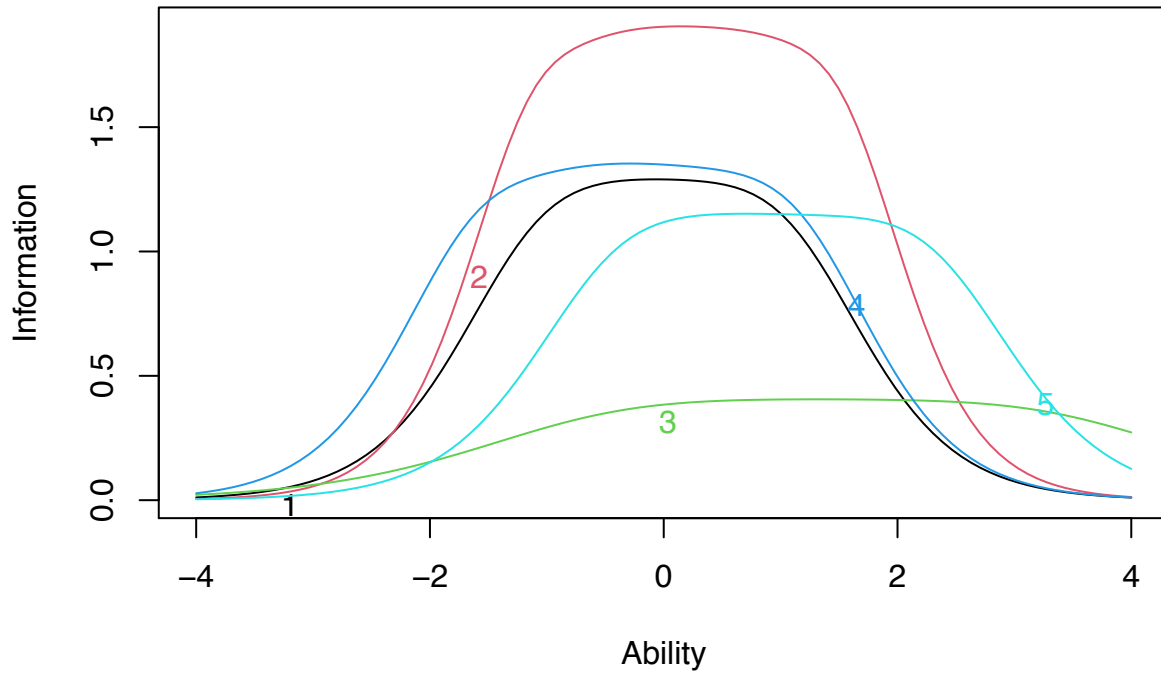

### Gender-based DIF: Demoralization

```
## Call:
## lordif::lordif(resp.data = as.data.frame(sex.data), group = sex)
##
##   Number of DIF groups: 2
##
##   Number of items flagged for DIF: 1 of 5
##
##   Items flagged: 2
##
##   Number of iterations for purification: 3 of 10
##
##   Detection criterion: Chisqr
##
##   Threshold: alpha = 0.01
##
##   item ncat  chi12  chi13  chi23
## 1     1     7 0.8571 0.9625 0.8336
## 2     2     7 0.0000 0.0000 0.7581
## 3     3     7 0.8880 0.7918 0.5038
## 4     4     7 0.3452 0.5849 0.6699
## 5     5     7 0.0560 0.1005 0.3319
```

### Trait Distributions

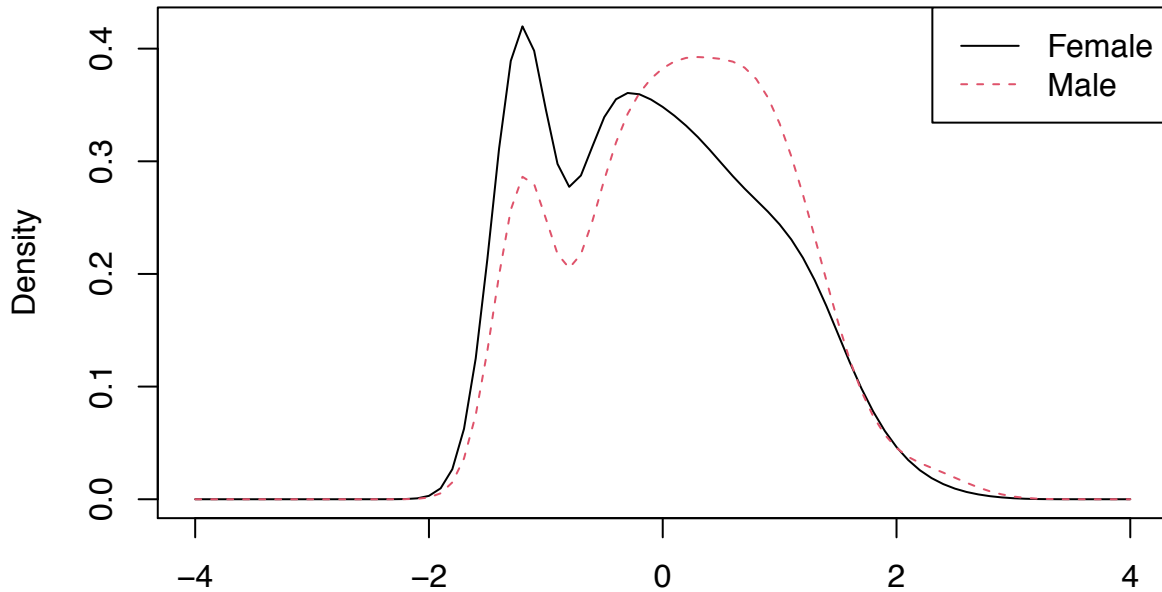

### Item True Score Functions – Item 2 Differences in Item True Score Function

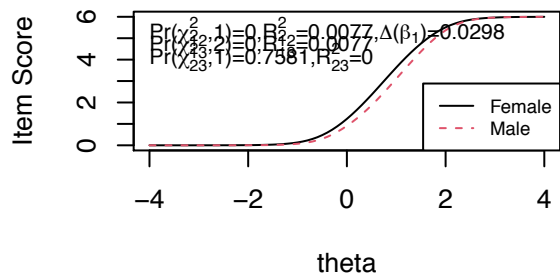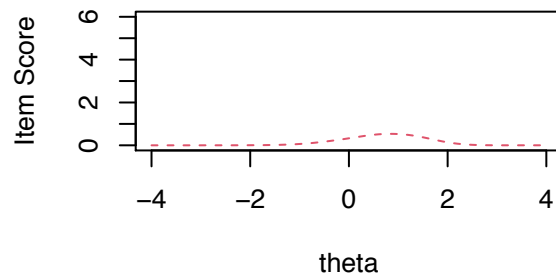

### Item Response Functions

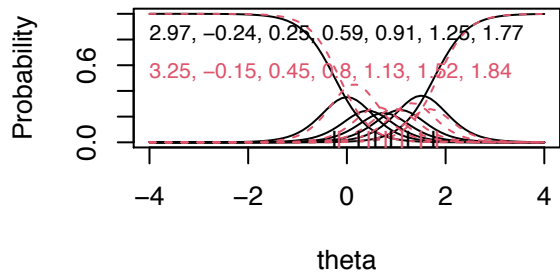

### Impact (Weighted by Density)

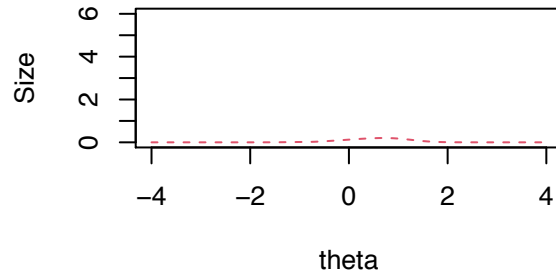

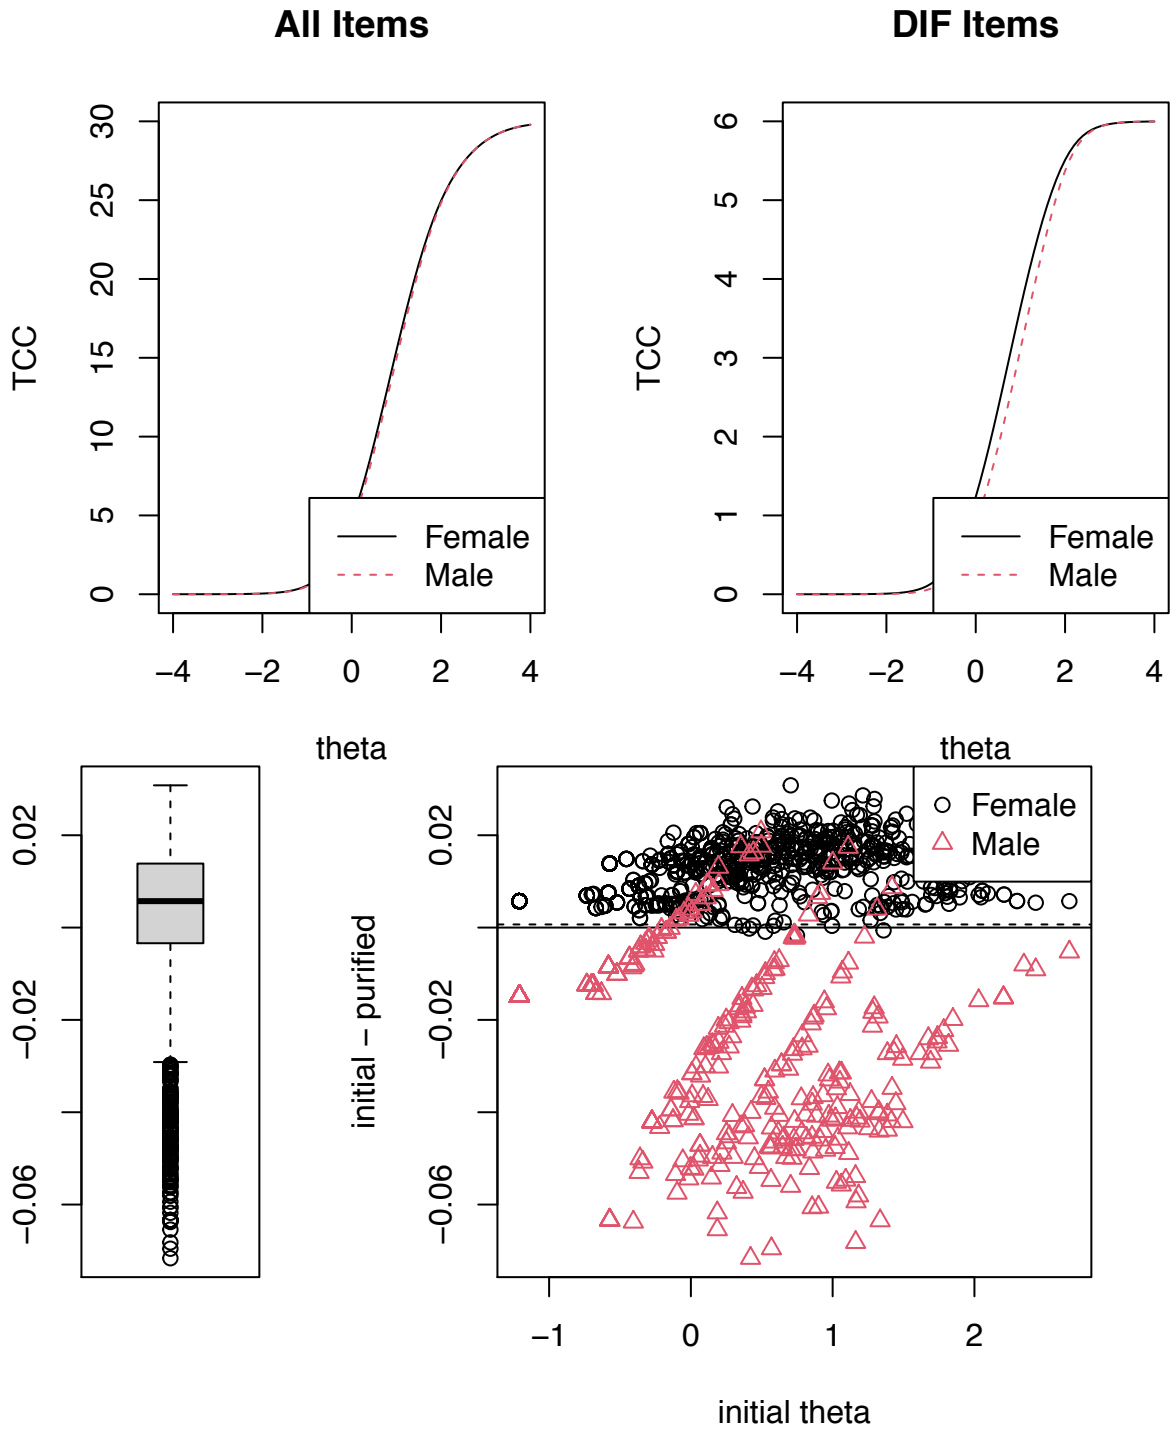

### Sample-based DIF: Demoralization

```
## Call:
## lordif::lordif(resp.data = as.data.frame(sample.data), group = clinYN)
##
## Number of DIF groups: 2
##
```

```

## Number of items flagged for DIF: 5 of 5
##
## Items flagged: 1, 2, 3, 4, 5
##
## Number of iterations for purification: 4 of 10
##
## Detection criterion: Chisqr
##
## Threshold: alpha = 0.01
##
## item ncat chi12 chi13 chi23
## 1 1 7 0 0 0.0000
## 2 2 7 0 0 0.0996
## 3 3 6 0 0 0.0000
## 4 4 7 0 0 0.0001
## 5 5 7 0 0 0.9601

```

Back to top

## Eating Problems

### Reliability: Eating Problems

```

## Cronbach's alpha is 0.751.
## Mean item-total correlation is 0.365.
## If each item were dropped:
##   raw_alpha std.alpha G6(smc) average_r S/N alpha se var.r med.r
## Q63    0.69    0.72    0.71    0.34 2.6    0.020 0.037 0.27
## Q18    0.68    0.70    0.68    0.32 2.3    0.020 0.027 0.26
## Q46    0.66    0.69    0.68    0.31 2.2    0.022 0.030 0.26
## Q47    0.80    0.81    0.79    0.46 4.3    0.013 0.024 0.49
## Q57    0.71    0.73    0.72    0.35 2.7    0.019 0.040 0.28
## Q86    0.75    0.78    0.77    0.41 3.5    0.016 0.044 0.49

```

Unidimensionality: Eating Problems

Scree Plot

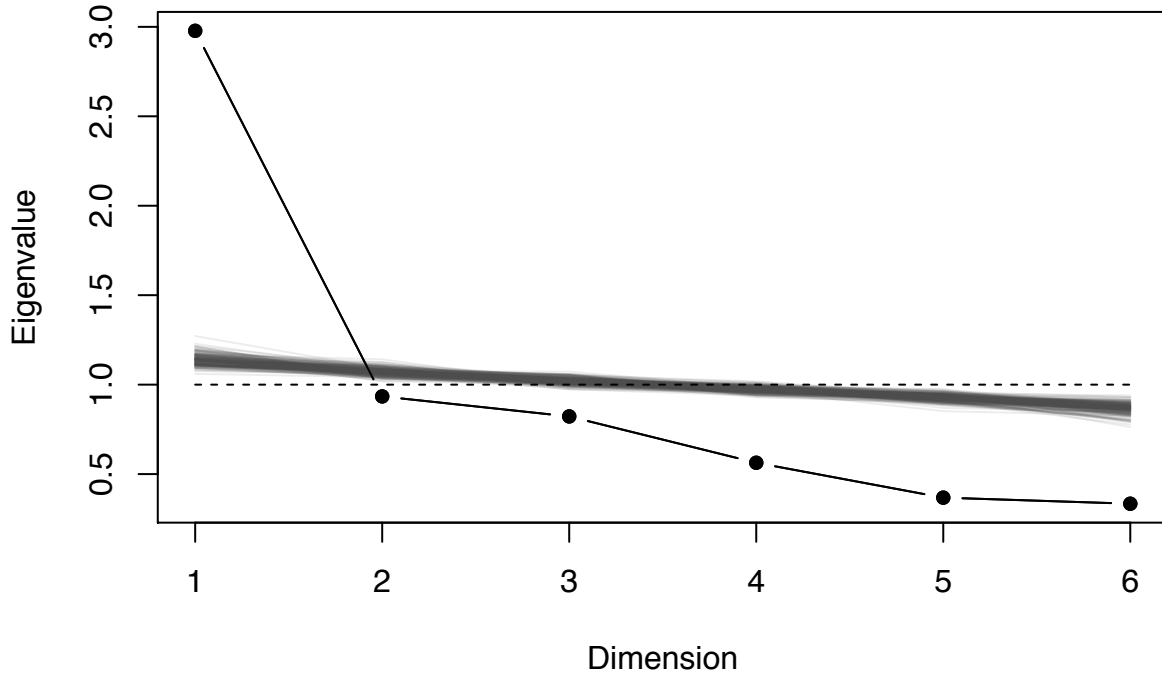

```
## [1] "Ratio of first to second eigenvalues: 3.187"  
## [1] 2.9776746 0.9342068 0.8223128 0.5632239 0.3682961 0.3342858  
## Factor Analysis using method = minres  
## Call: fa(r = grm_obj$X)  
## Standardized loadings (pattern matrix) based upon correlation matrix  
##      MR1  h2  u2 com  
## Q63 0.71 0.51 0.49 1  
## Q18 0.82 0.67 0.33 1  
## Q46 0.83 0.69 0.31 1  
## Q47 0.24 0.06 0.94 1  
## Q57 0.66 0.44 0.56 1  
## Q86 0.39 0.16 0.84 1  
##  
##              MR1  
## SS loadings  2.52  
## Proportion Var 0.42  
##  
## Mean item complexity = 1  
## Test of the hypothesis that 1 factor is sufficient.  
##  
## The degrees of freedom for the null model are 15 and the objective function was 1.84 with Chi Squ  
## The degrees of freedom for the model are 9 and the objective function was 0.04  
##  
## The root mean square of the residuals (RMSR) is 0.03  
## The df corrected root mean square of the residuals is 0.04  
##
```

```

## The harmonic number of observations is 595 with the empirical chi square 13.27 with prob < 0.15
## The total number of observations was 619 with Likelihood Chi Square = 25.12 with prob < 0.0028
##
## Tucker Lewis Index of factoring reliability = 0.976
## RMSEA index = 0.054 and the 90 % confidence intervals are 0.029 0.079
## BIC = -32.73
## Fit based upon off diagonal values = 1
## Measures of factor score adequacy
##
## Correlation of (regression) scores with factors MR1 0.93
## Multiple R square of scores with factors 0.86
## Minimum correlation of possible factor scores 0.73

```

**Graded-Response Model: Eating Problems**

| ##     | Extrmt1 | Extrmt2 | Extrmt3 | Extrmt4 | Extrmt5 | Extrmt6 | Dscrmn |
|--------|---------|---------|---------|---------|---------|---------|--------|
| ## Q63 | -0.323  | 0.167   | 0.556   | 0.954   | 1.261   | 1.655   | 2.565  |
| ## Q18 | 0.666   | 1.116   | 1.380   | 1.634   | 1.782   | 2.056   | 3.708  |
| ## Q46 | 0.216   | 0.682   | 0.874   | 1.091   | 1.303   | 1.532   | 3.543  |
| ## Q47 | -1.224  | 0.057   | 0.737   | 1.700   | 2.578   | 3.842   | 0.531  |
| ## Q57 | 0.860   | 1.254   | 1.486   | 1.685   | 1.869   | 2.169   | 2.710  |
| ## Q86 | -2.243  | -1.367  | -0.724  | -0.006  | 0.728   | 1.573   | 1.003  |

**Test Information Function**

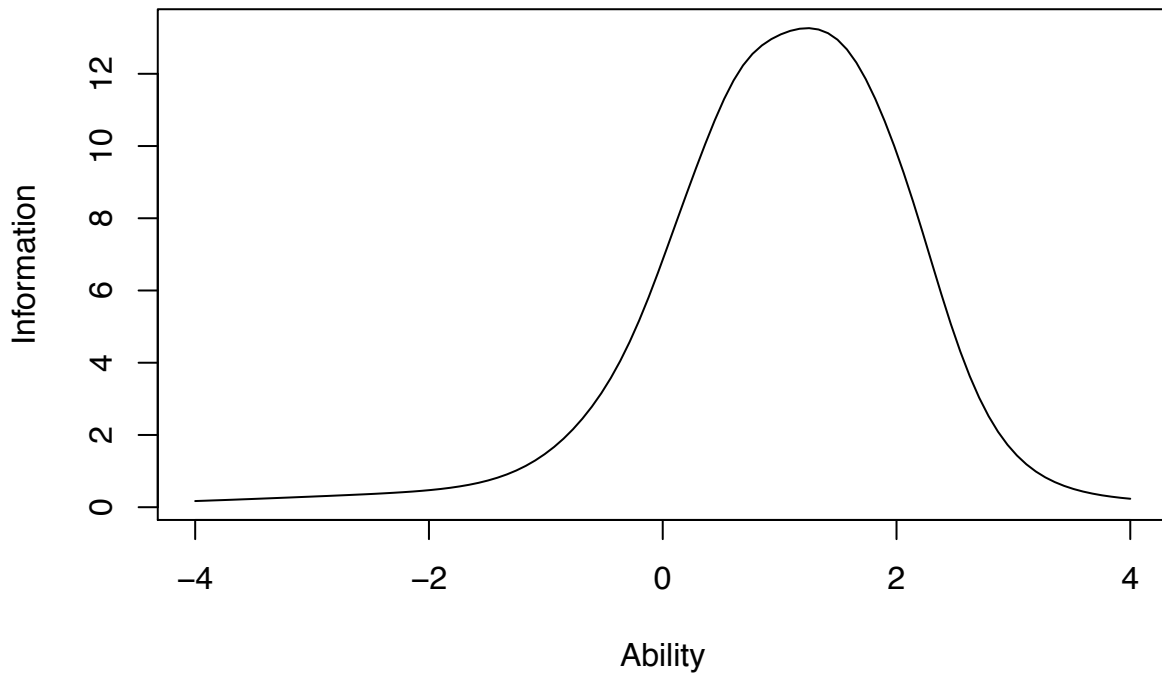

## Item Information Curves

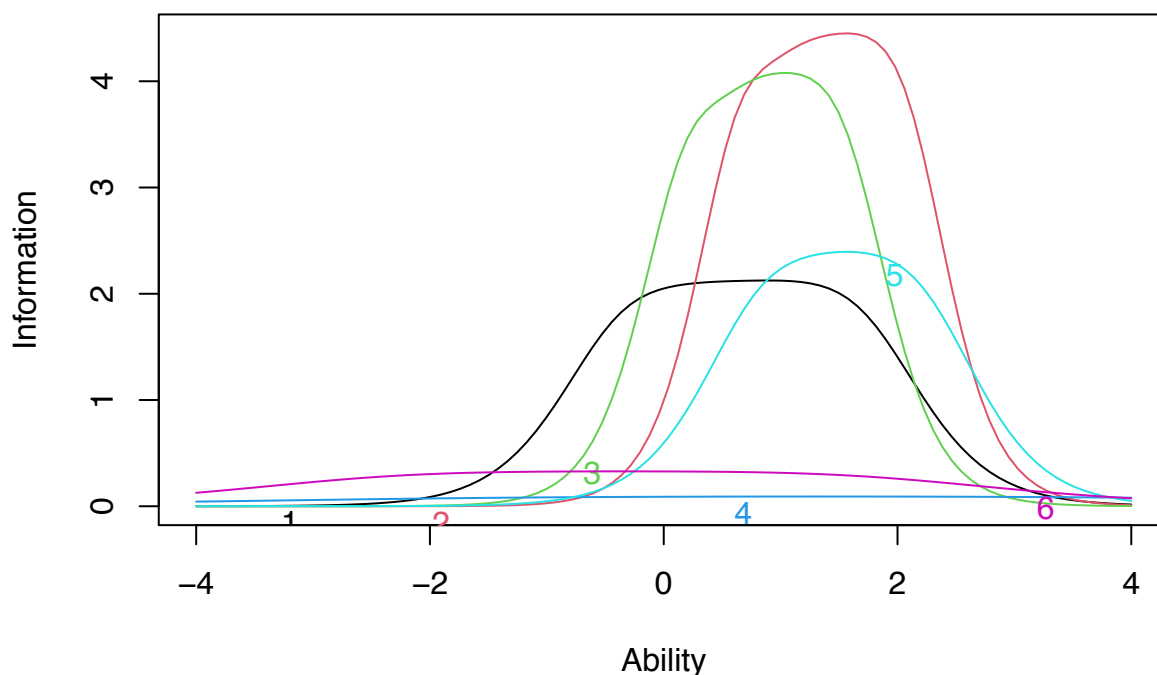

### Gender-based DIF: Eating Problems

```
## Call:
## lordif::lordif(resp.data = as.data.frame(sex.data), group = sex)
##
## Number of DIF groups: 2
##
## Number of items flagged for DIF: 2 of 6
##
## Items flagged: 5, 6
##
## Number of iterations for purification: 2 of 10
##
## Detection criterion: Chisqr
##
## Threshold: alpha = 0.01
##
## item ncat chi12 chi13 chi23
## 1 1 7 0.1350 0.2649 0.5156
## 2 2 5 0.0183 0.0413 0.3703
## 3 3 7 0.9834 0.9395 0.7244
## 4 4 7 0.7325 0.7573 0.5076
## 5 5 5 0.0022 0.0003 0.0085
## 6 6 7 0.0008 0.0000 0.0029
```

### Trait Distributions

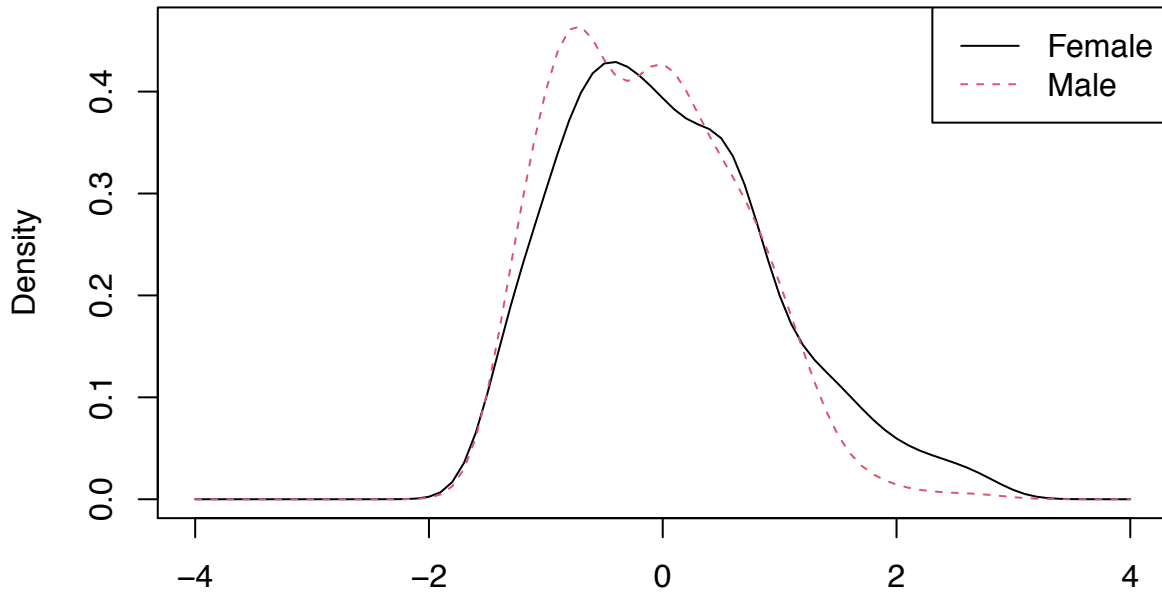

### Item True Score Functions – Item 5 Differences in Item True Score Function

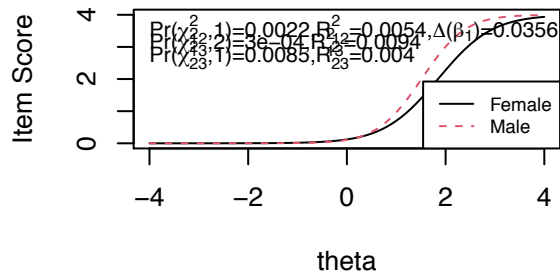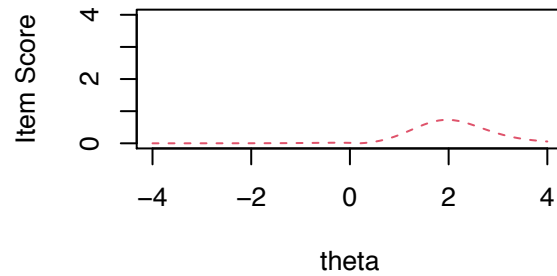

### Item Response Functions

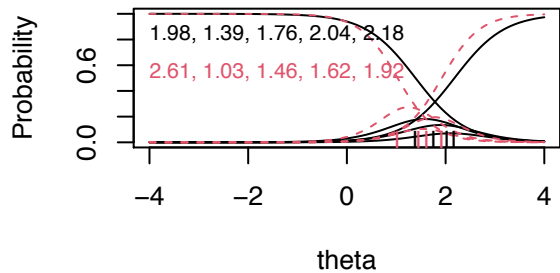

### Impact (Weighted by Density)

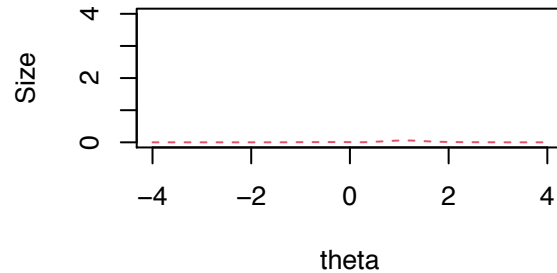



**Item True Score Functions – Item 6**

**Differences in Item True Score Function**

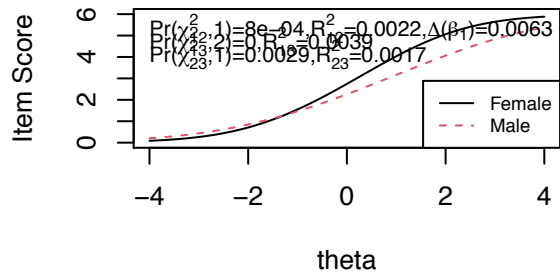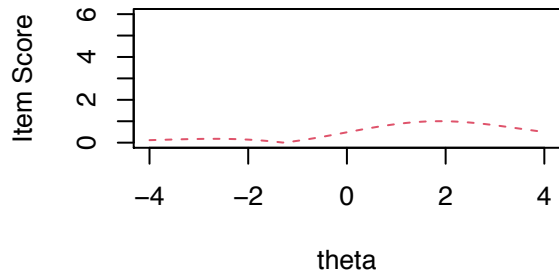

**Item Response Functions**

**Impact (Weighted by Density)**

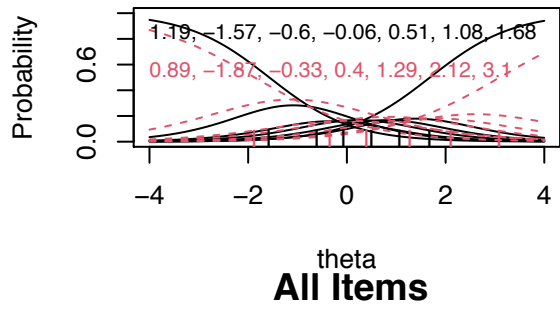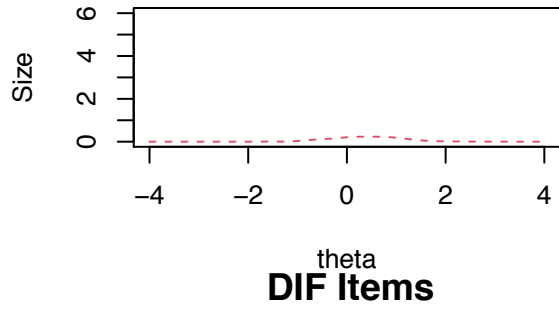

**All Items**

**DIF Items**

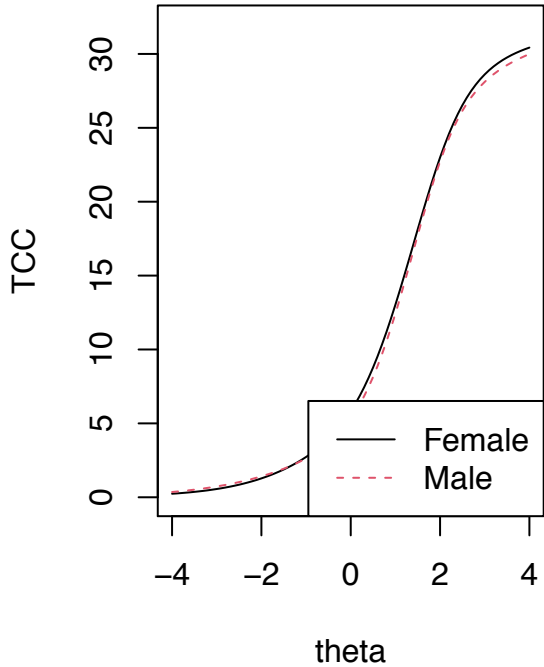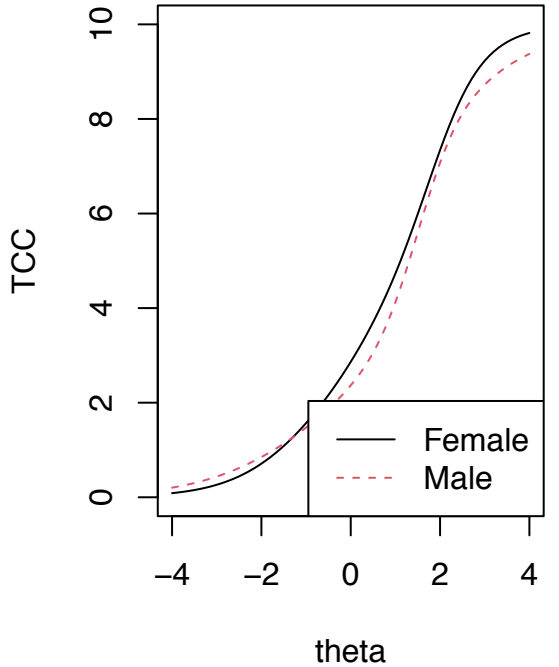

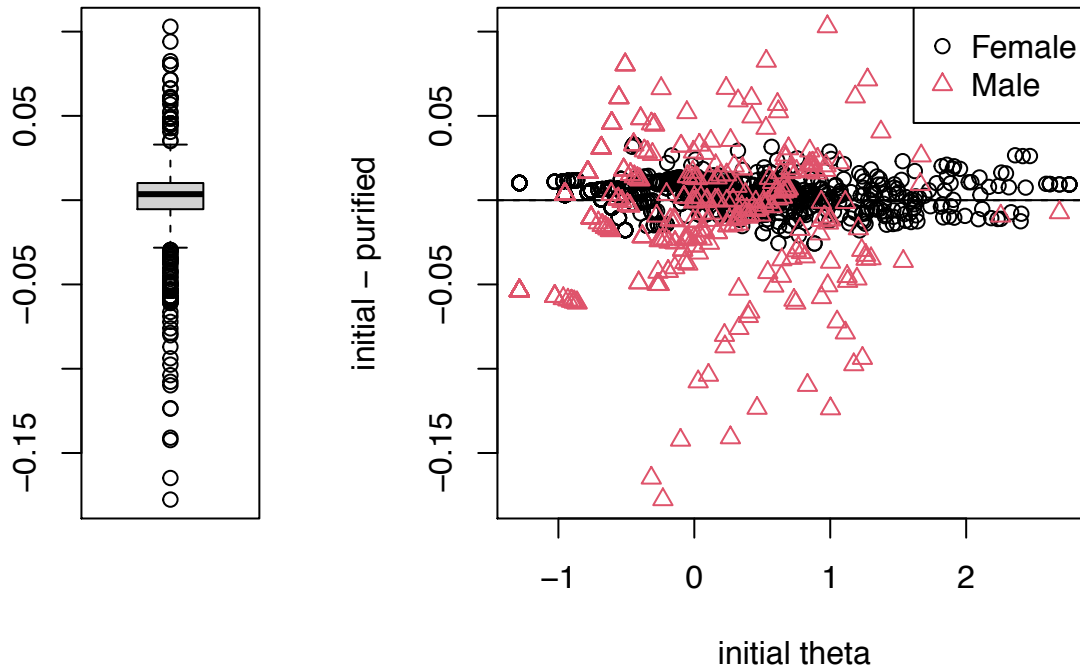

### Sample-based DIF: Eating Problems

```
## Call:
## lordif::lordif(resp.data = as.data.frame(sample.data), group = clinYN)
##
## Number of DIF groups: 2
##
## Number of items flagged for DIF: 6 of 6
##
## Items flagged: 1, 2, 3, 4, 5, 6
##
## Number of iterations for purification: 2 of 10
##
## Detection criterion: Chisqr
##
## Threshold: alpha = 0.01
##
## item ncat chi12 chi13 chi23
## 1 1 7 0.0000 0e+00 0.0278
## 2 2 6 0.7208 0e+00 0.0000
## 3 3 7 0.0000 0e+00 0.0189
## 4 4 7 0.0000 0e+00 0.0035
## 5 5 6 0.0001 3e-04 0.7931
## 6 6 7 0.0000 0e+00 0.0070
```

Back to top

# Hypervigilance

## Reliability: Hypervigilance

```
## Cronbach's alpha is 0.502.  
## Mean item-total correlation is 0.199.  
## If each item were dropped:  
##      raw_alpha std.alpha G6(smc) average_r S/N alpha se var.r med.r  
## Q2      0.40      0.40   0.32      0.18 0.68   0.036 0.0024 0.17  
## Q7      0.30      0.30   0.23      0.13 0.43   0.043 0.0015 0.12  
## Q9-     0.51      0.51   0.44      0.25 1.03   0.029 0.0290 0.24  
## Q50-    0.48      0.48   0.41      0.23 0.91   0.032 0.0302 0.15
```

## Unidimensionality: Hypervigilance

### Scree Plot

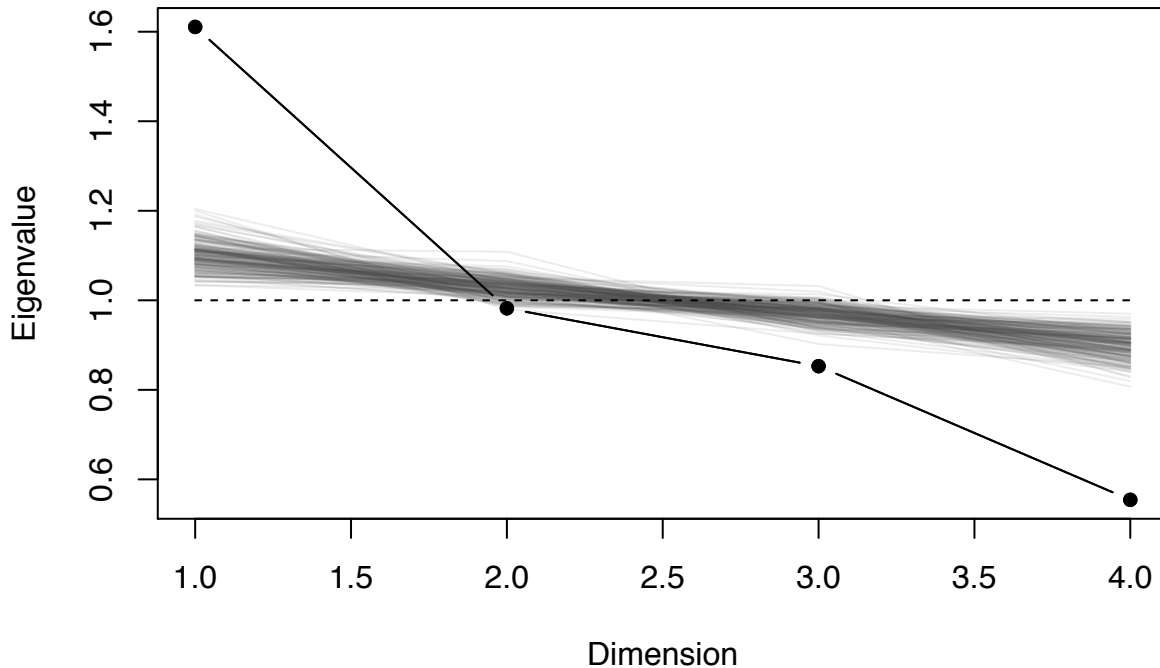

```
## [1] "Ratio of first to second eigenvalues: 1.64"  
## [1] 1.6106444 0.9821730 0.8529011 0.5542815  
## Factor Analysis using method = minres  
## Call: fa(r = grm_obj$X)  
## Standardized loadings (pattern matrix) based upon correlation matrix  
##      MR1    h2    u2 com  
## Q2  0.50 0.254 0.75  1  
## Q7  0.81 0.661 0.34  1  
## Q9 -0.22 0.050 0.95  1  
## Q50 -0.27 0.074 0.93  1  
##  
##              MR1  
## SS loadings  1.04
```

```

## Proportion Var 0.26
##
## Mean item complexity = 1
## Test of the hypothesis that 1 factor is sufficient.
##
## The degrees of freedom for the null model are 6 and the objective function was 0.29 with Chi Squa
## The degrees of freedom for the model are 2 and the objective function was 0.02
##
## The root mean square of the residuals (RMSR) is 0.04
## The df corrected root mean square of the residuals is 0.08
##
## The harmonic number of observations is 526 with the empirical chi square 12.71 with prob < 0.001
## The total number of observations was 814 with Likelihood Chi Square = 13.6 with prob < 0.0011
##
## Tucker Lewis Index of factoring reliability = 0.848
## RMSEA index = 0.084 and the 90 % confidence intervals are 0.046 0.129
## BIC = 0.19
## Fit based upon off diagonal values = 0.96
## Measures of factor score adequacy
##
##                                     MR1
## Correlation of (regression) scores with factors 0.84
## Multiple R square of scores with factors 0.71
## Minimum correlation of possible factor scores 0.42

```

#### Graded-Response Model: Hypervigilance

| ##     | Extrmt1 | Extrmt2 | Extrmt3 | Extrmt4 | Extrmt5 | Extrmt6 | Dscrmn |
|--------|---------|---------|---------|---------|---------|---------|--------|
| ## Q2  | -1.170  | -0.297  | 0.325   | 0.912   | 1.596   | 2.307   | 1.271  |
| ## Q7  | -1.662  | -0.946  | -0.551  | -0.045  | 0.600   | 1.299   | 2.311  |
| ## Q9  | 7.802   | 5.107   | 3.237   | 2.268   | 0.712   | -1.297  | -0.443 |
| ## Q50 | 2.410   | 0.586   | -0.980  | -2.933  | -4.620  | -7.070  | -0.542 |

## Test Information Function

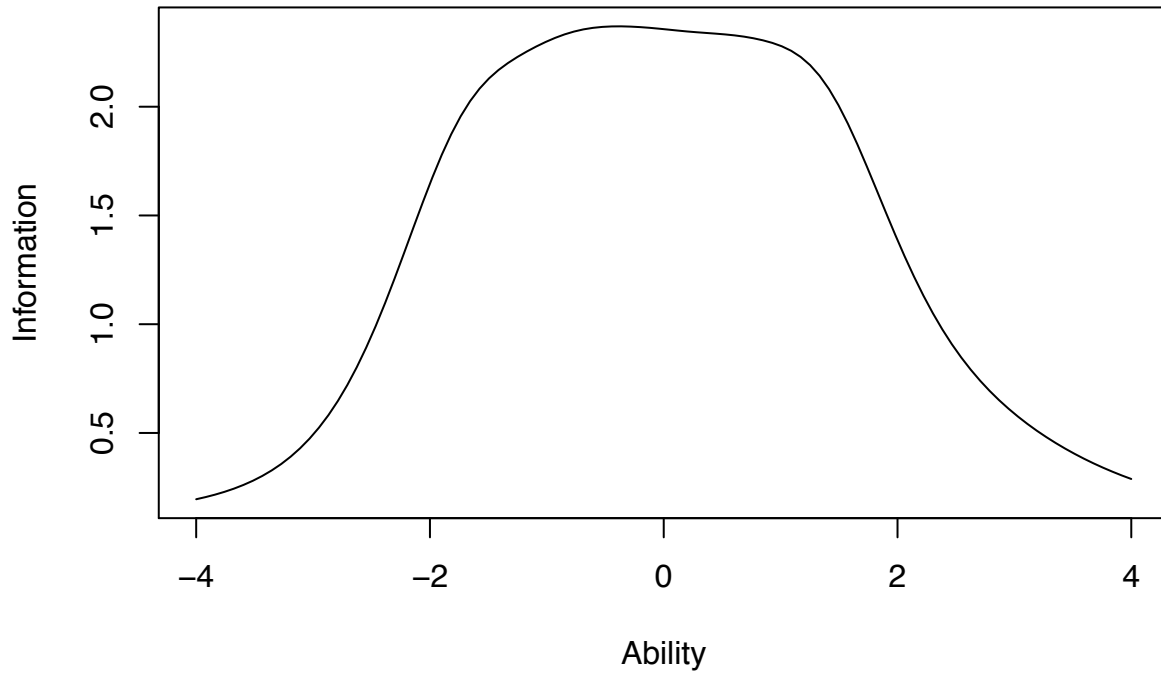

## Item Information Curves

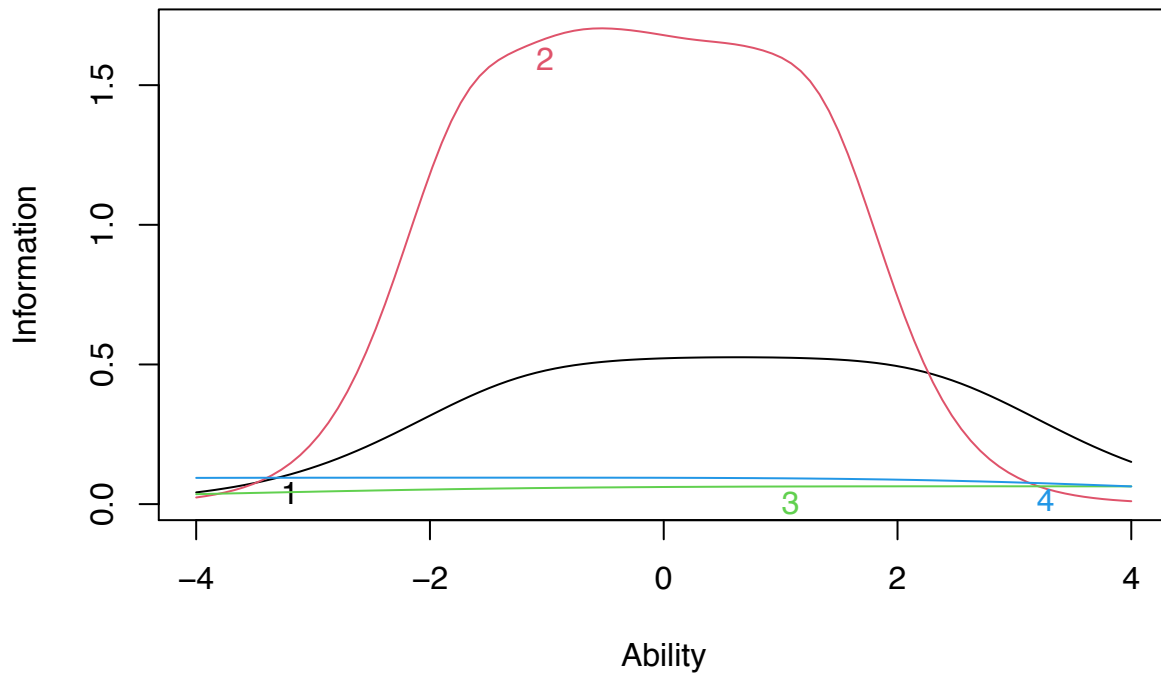

Gender-based DIF: Hypervigilance

```
## Call:
```

```
## lordif::lordif(resp.data = as.data.frame(sex.data), group = sex)
```

```
##
## Number of DIF groups: 2
##
## Number of items flagged for DIF: 0 of 4
##
## Items flagged:
##
## Number of iterations for purification: 1 of 10
##
## Detection criterion: Chisqr
##
## Threshold: alpha = 0.01
```

### Sample-based DIF: Hypervigilance

```
## Call:
## lordif::lordif(resp.data = as.data.frame(sample.data), group = clinYN)
##
## Number of DIF groups: 2
##
## Number of items flagged for DIF: 4 of 4
##
## Items flagged: 1, 2, 3, 4
##
## Number of iterations for purification: 1 of 10
##
## Detection criterion: Chisqr
##
## Threshold: alpha = 0.01
##
## item ncat chi12 chi13 chi23
## 1 1 7 0.0002 0.0007 0.3568
## 2 2 7 0.0011 0.0025 0.2490
## 3 3 6 0.0000 0.0000 0.0001
## 4 4 7 0.0000 0.0000 0.4669
```

Back to top

### Pressure from Negative Affect

#### Reliability: Pressure from Negative Affect

```
## Cronbach's alpha is 0.762.
## Mean item-total correlation is 0.266.
## If each item were dropped:
## raw_alpha std.alpha G6(smc) average_r S/N alpha se var.r med.r
## Q28 0.74 0.75 0.75 0.27 2.9 0.015 0.024 0.21
## Q21 0.76 0.76 0.76 0.29 3.2 0.014 0.023 0.23
## Q30 0.76 0.77 0.77 0.29 3.3 0.014 0.022 0.24
## Q32 0.76 0.77 0.77 0.29 3.3 0.014 0.022 0.24
## Q33 0.76 0.76 0.76 0.29 3.2 0.014 0.022 0.22
## Q42 0.71 0.71 0.71 0.24 2.5 0.017 0.013 0.21
## Q51 0.72 0.72 0.72 0.24 2.6 0.017 0.017 0.21
```

```
## Q60    0.72    0.72    0.71    0.24 2.6    0.016 0.014 0.21
## Q88    0.71    0.72    0.72    0.24 2.5    0.017 0.018 0.21
```

Unidimensionality: Pressure from Negative Affect

### Scree Plot

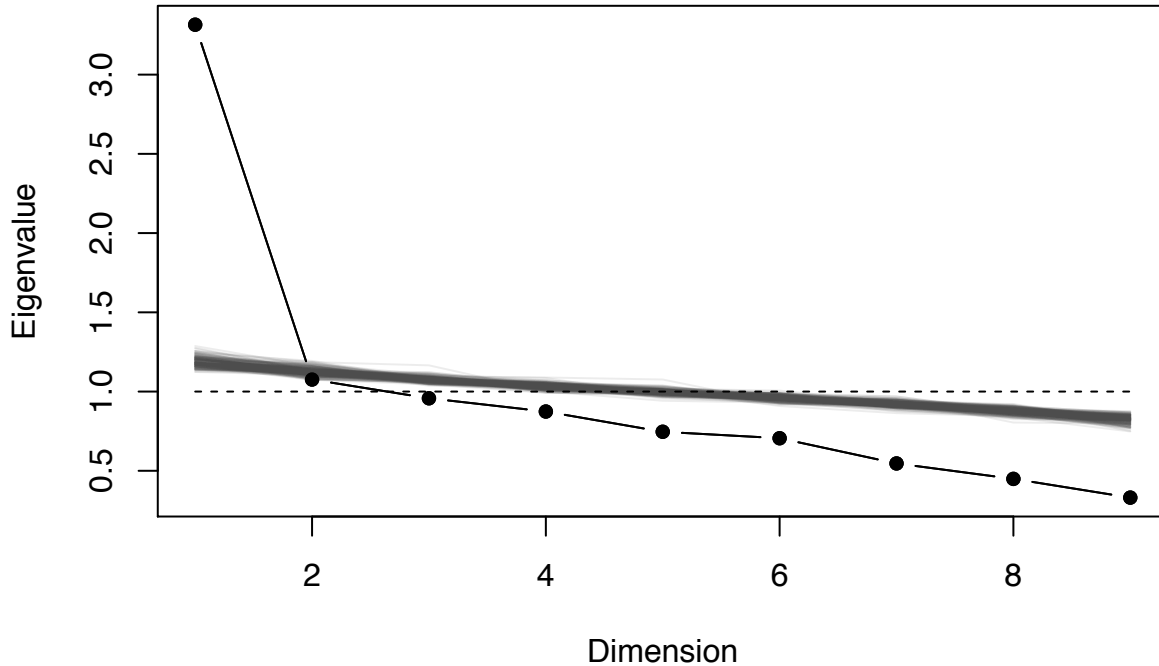

```
## [1] "Ratio of first to second eigenvalues: 3.081"
## [1] 3.3149321 1.0759714 0.9575043 0.8739044 0.7461750 0.7054858 0.5463449
## [8] 0.4489102 0.3307720

## Factor Analysis using method = minres
## Call: fa(r = grm_obj$X)
## Standardized loadings (pattern matrix) based upon correlation matrix
##      MR1    h2    u2 com
## Q28 0.47 0.217 0.78  1
## Q21 0.33 0.107 0.89  1
## Q30 0.30 0.091 0.91  1
## Q32 0.30 0.091 0.91  1
## Q33 0.36 0.127 0.87  1
## Q42 0.78 0.612 0.39  1
## Q51 0.70 0.488 0.51  1
## Q60 0.72 0.515 0.49  1
## Q88 0.71 0.498 0.50  1
##
##              MR1
## SS loadings    2.75
## Proportion Var 0.31
##
## Mean item complexity = 1
## Test of the hypothesis that 1 factor is sufficient.
```

```

##
## The degrees of freedom for the null model are 36 and the objective function was 2.06 with Chi Squ
## The degrees of freedom for the model are 27 and the objective function was 0.18
##
## The root mean square of the residuals (RMSR) is 0.05
## The df corrected root mean square of the residuals is 0.06
##
## The harmonic number of observations is 596 with the empirical chi square 100.86 with prob < 1.9e
## The total number of observations was 619 with Likelihood Chi Square = 107.41 with prob < 1.5e-1
##
## Tucker Lewis Index of factoring reliability = 0.913
## RMSEA index = 0.069 and the 90 % confidence intervals are 0.056 0.083
## BIC = -66.15
## Fit based upon off diagonal values = 0.97
## Measures of factor score adequacy
##
## Correlation of (regression) scores with factors MR1 0.92
## Multiple R square of scores with factors 0.84
## Minimum correlation of possible factor scores 0.68

```

#### Graded-Response Model: Pressure from Negative Affect

| ##     | Extrmt1 | Extrmt2 | Extrmt3 | Extrmt4 | Extrmt5 | Extrmt6 | Dscrmn |
|--------|---------|---------|---------|---------|---------|---------|--------|
| ## Q28 | -0.888  | -0.079  | 0.405   | 0.964   | 1.460   | 2.286   | 1.012  |
| ## Q21 | -0.821  | 0.517   | 1.144   | 1.904   | 2.699   | 3.756   | 0.597  |
| ## Q30 | -1.704  | -0.432  | 0.642   | 1.685   | 2.946   | 4.047   | 0.565  |
| ## Q32 | 1.857   | 2.400   | 2.642   | 2.878   | 3.022   | 3.325   | 0.861  |
| ## Q33 | -3.680  | -2.399  | -1.641  | -0.695  | 0.496   | 1.656   | 0.728  |
| ## Q42 | -1.452  | -0.815  | -0.423  | -0.043  | 0.460   | 1.014   | 2.611  |
| ## Q51 | -1.853  | -1.332  | -0.854  | -0.345  | 0.261   | 0.865   | 1.934  |
| ## Q60 | -2.524  | -1.833  | -1.017  | -0.143  | 0.675   | 1.441   | 2.178  |
| ## Q88 | -1.098  | -0.625  | -0.268  | 0.156   | 0.618   | 1.080   | 1.788  |



## Test Information Function

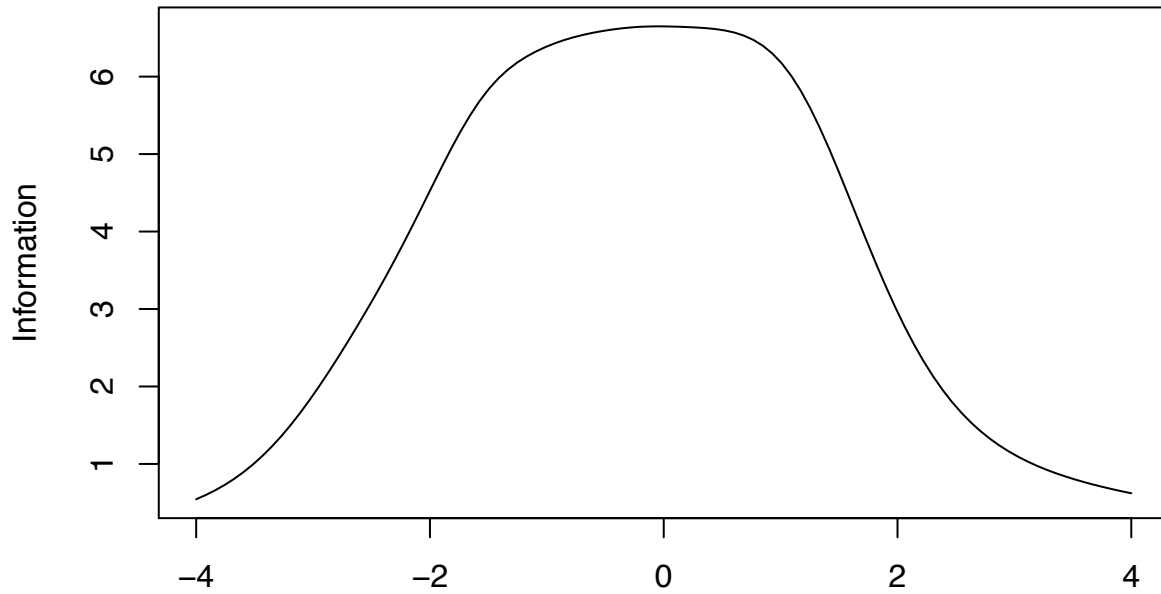

## Item Information Curves

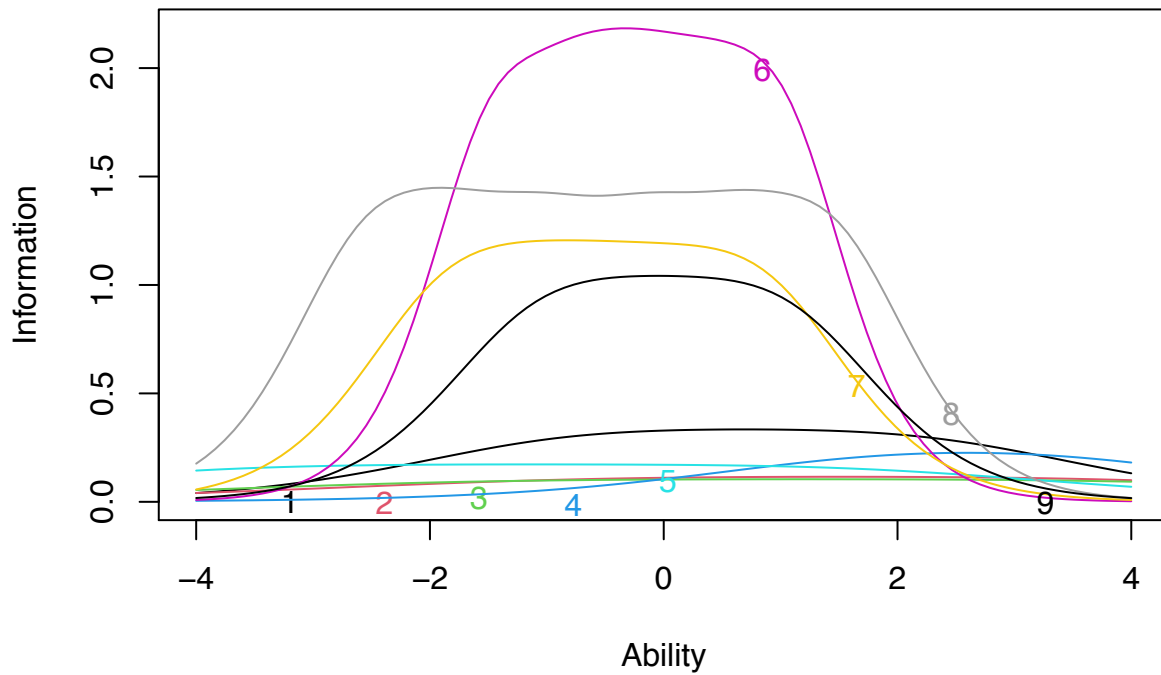

Gender-based DIF: Pressure from Negative Affect

## Call:

```
## lordif::lordif(resp.data = as.data.frame(sex.data), group = sex)
```

```

##
## Number of DIF groups: 2
##
## Number of items flagged for DIF: 1 of 9
##
## Items flagged: 1
##
## Number of iterations for purification: 2 of 10
##
## Detection criterion: Chisqr
##
## Threshold: alpha = 0.01
##
## item ncat chi12 chi13 chi23
## 1 1 7 0.0000 0.0000 0.4929
## 2 2 7 0.8050 0.7915 0.5236
## 3 3 7 0.6081 0.8446 0.7844
## 4 4 3 0.7143 0.6104 0.3556
## 5 5 7 0.1627 0.1935 0.2478
## 6 6 7 0.7395 0.8586 0.6593
## 7 7 7 0.6815 0.1484 0.0562
## 8 8 7 0.7710 0.4137 0.1949
## 9 9 7 0.2798 0.3582 0.3467

```

### Trait Distributions

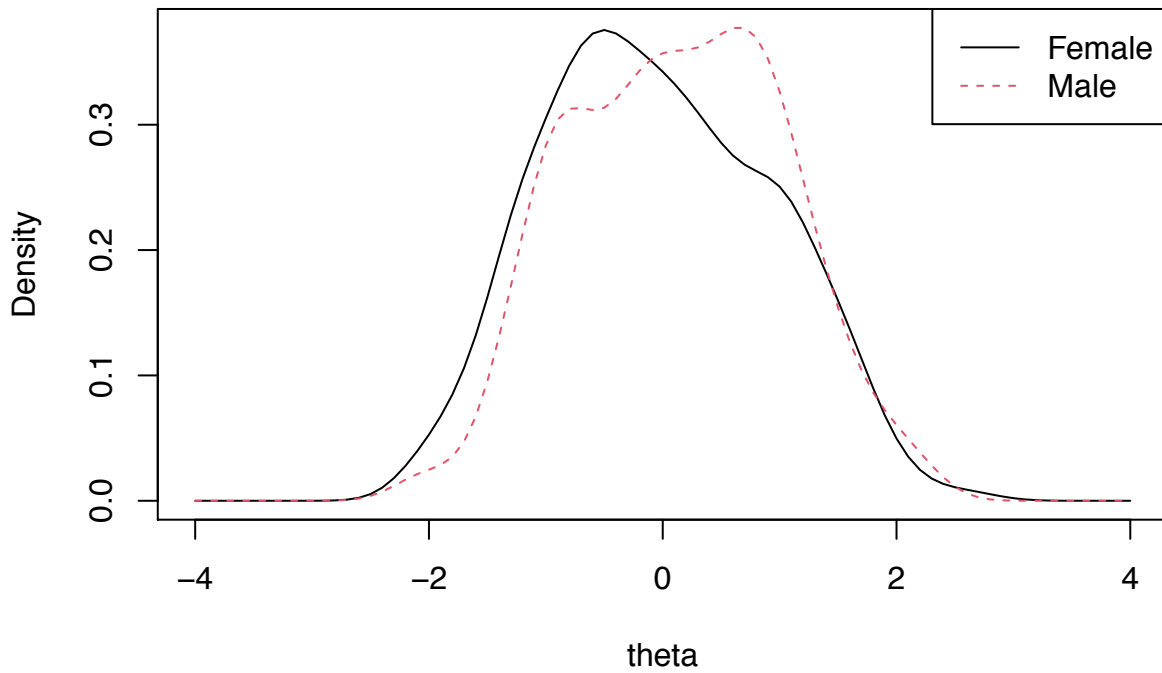

**Item True Score Functions – Item 1**

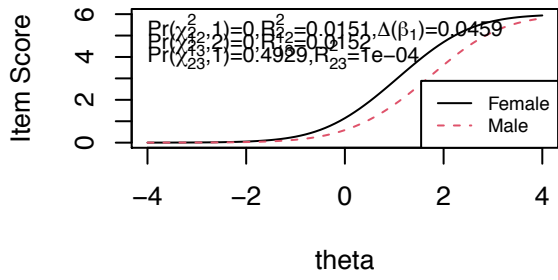

**Differences in Item True Score Function**

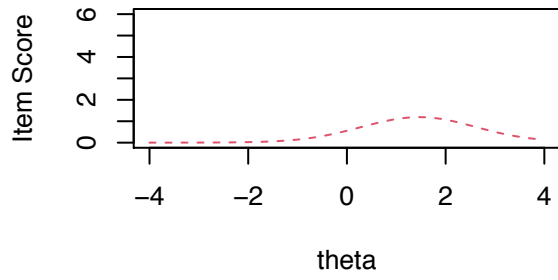

**Item Response Functions**

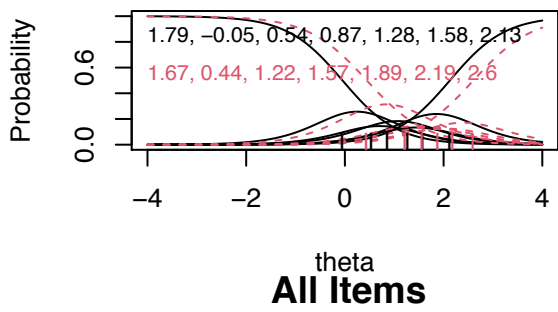

**Impact (Weighted by Density)**

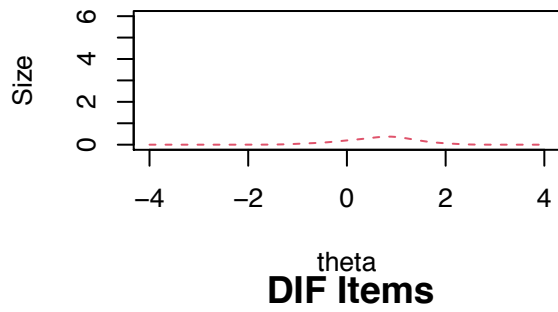

**All Items**

**DIF Items**

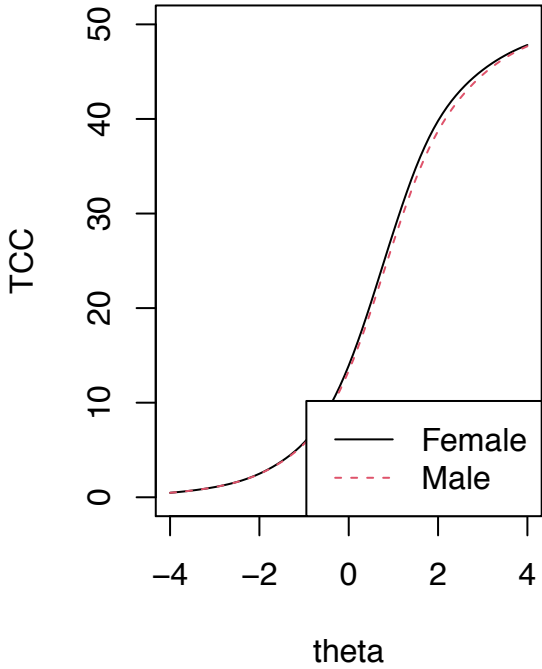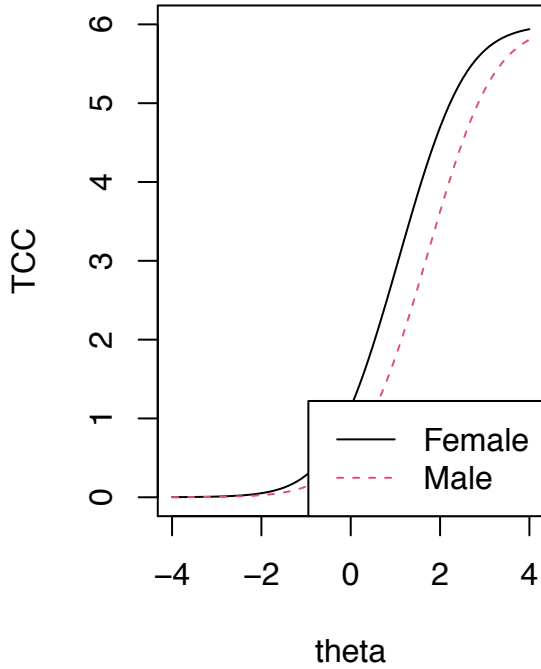

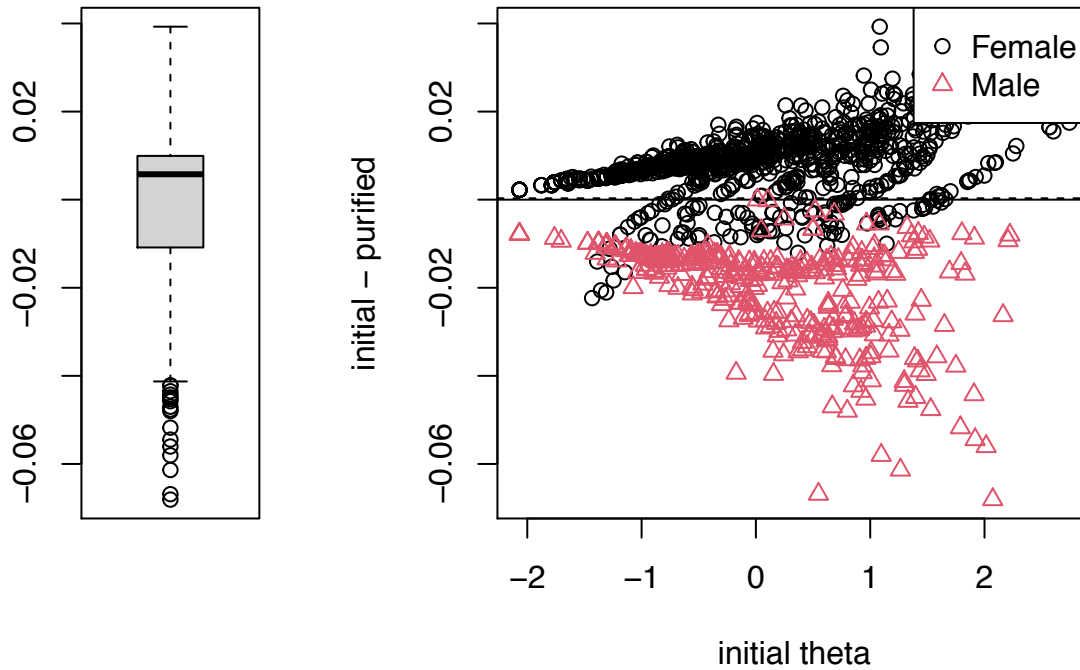

#### Sample-based DIF: Pressure from Negative Affect

```
## Call:
## lordif::lordif(resp.data = as.data.frame(sample.data), group = clinYN)
##
## Number of DIF groups: 2
##
## Number of items flagged for DIF: 9 of 9
##
## Items flagged: 1, 2, 3, 4, 5, 6, 7, 8, 9
##
## Number of iterations for purification: 4 of 10
##
## Detection criterion: Chisqr
##
## Threshold: alpha = 0.01
##
## item ncat chi12 chi13 chi23
## 1 1 7 0 0 0.0141
## 2 2 7 0 0 0.8857
## 3 3 7 0 0 0.1536
## 4 4 3 0 0 0.0949
## 5 5 7 0 0 0.6517
## 6 6 7 0 0 0.1544
## 7 7 7 0 0 0.0503
## 8 8 7 0 0 0.0151
## 9 9 7 0 0 0.0069
```

Back to top

## Perfectionism

### Reliability: Perfectionism

```
## Cronbach's alpha is 0.732.
## Mean item-total correlation is 0.282.
## If each item were dropped:
##   raw_alpha std.alpha G6(smc) average_r S/N alpha se var.r med.r
## Q20    0.70    0.70    0.68    0.28 2.3    0.016 0.0063 0.26
## Q26    0.68    0.69    0.66    0.27 2.2    0.017 0.0055 0.26
## Q28    0.71    0.71    0.68    0.29 2.5    0.016 0.0056 0.27
## Q38    0.69    0.69    0.67    0.28 2.3    0.017 0.0065 0.26
## Q48    0.71    0.72    0.70    0.30 2.5    0.016 0.0061 0.29
## Q52    0.70    0.69    0.66    0.27 2.3    0.016 0.0033 0.26
## Q68    0.71    0.71    0.68    0.29 2.4    0.016 0.0038 0.29
```

### Unidimensionality: Perfectionism

#### Scree Plot

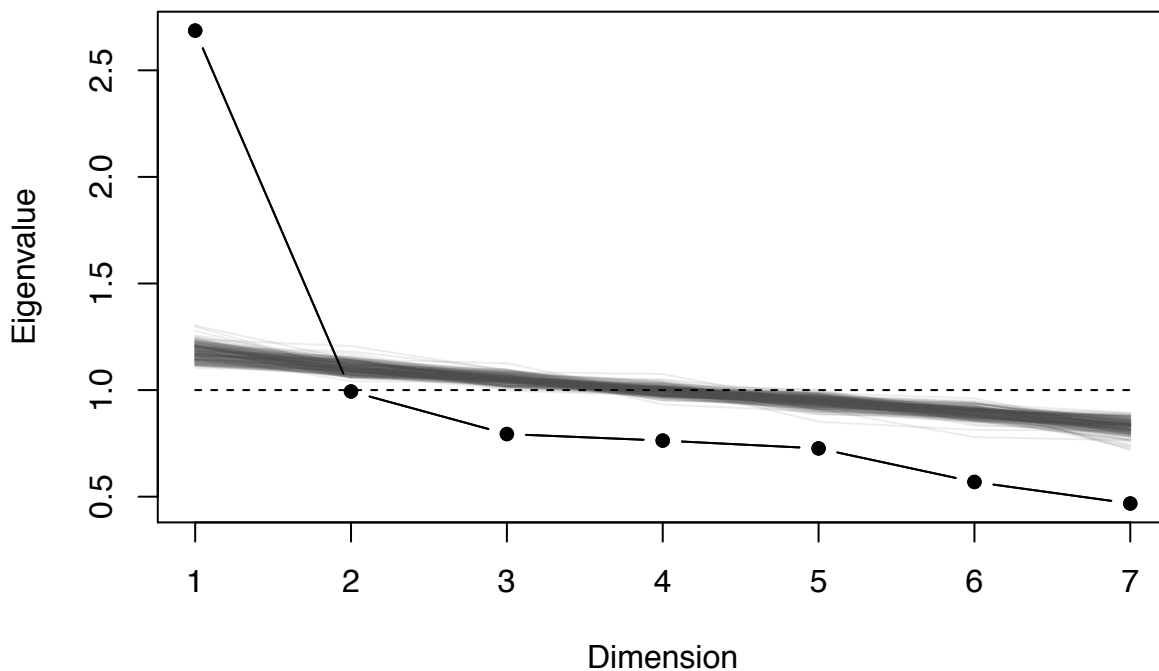

```
## [1] "Ratio of first to second eigenvalues: 2.704"
## [1] 2.6864042 0.9934927 0.7937032 0.7631167 0.7263723 0.5689176 0.4679932
## Factor Analysis using method = minres
## Call: fa(r = grm_obj$X)
## Standardized loadings (pattern matrix) based upon correlation matrix
##   MR1  h2  u2 com
## Q20 0.53 0.28 0.72  1
## Q26 0.62 0.39 0.61  1
## Q28 0.46 0.21 0.79  1
## Q38 0.57 0.32 0.68  1
```

```

## Q48 0.45 0.21 0.79 1
## Q52 0.57 0.33 0.67 1
## Q68 0.49 0.24 0.76 1
##
##          MR1
## SS loadings 1.98
## Proportion Var 0.28
##
## Mean item complexity = 1
## Test of the hypothesis that 1 factor is sufficient.
##
## The degrees of freedom for the null model are 21 and the objective function was 1.16 with Chi Squ
## The degrees of freedom for the model are 14 and the objective function was 0.15
##
## The root mean square of the residuals (RMSR) is 0.06
## The df corrected root mean square of the residuals is 0.07
##
## The harmonic number of observations is 458 with the empirical chi square 68.2 with prob < 4.1e-05
## The total number of observations was 814 with Likelihood Chi Square = 122.68 with prob < 1.9e-15
##
## Tucker Lewis Index of factoring reliability = 0.823
## RMSEA index = 0.098 and the 90 % confidence intervals are 0.082 0.114
## BIC = 28.85
## Fit based upon off diagonal values = 0.96
## Measures of factor score adequacy
##
##          MR1
## Correlation of (regression) scores with factors 0.86
## Multiple R square of scores with factors 0.74
## Minimum correlation of possible factor scores 0.48

```

### Graded-Response Model: Perfectionism

| ##     | Extrmt1 | Extrmt2 | Extrmt3 | Extrmt4 | Extrmt5 | Extrmt6 | Dscrmn |
|--------|---------|---------|---------|---------|---------|---------|--------|
| ## Q20 | -1.465  | -0.536  | 0.132   | 0.828   | 1.586   | 2.587   | 1.254  |
| ## Q26 | -1.282  | -0.488  | -0.036  | 0.519   | 1.228   | 2.075   | 1.514  |
| ## Q28 | -0.760  | -0.097  | 0.467   | 0.981   | 1.560   | 2.469   | 1.122  |
| ## Q38 | -1.649  | -0.849  | -0.264  | 0.274   | 0.919   | 1.781   | 1.263  |
| ## Q48 | 0.546   | 1.285   | 1.688   | 2.150   | 2.744   | 3.236   | 1.037  |
| ## Q52 | -2.610  | -1.935  | -1.416  | -0.584  | 0.209   | 1.215   | 1.460  |
| ## Q68 | -2.779  | -1.732  | -1.067  | -0.487  | 0.331   | 1.174   | 1.184  |

### Test Information Function

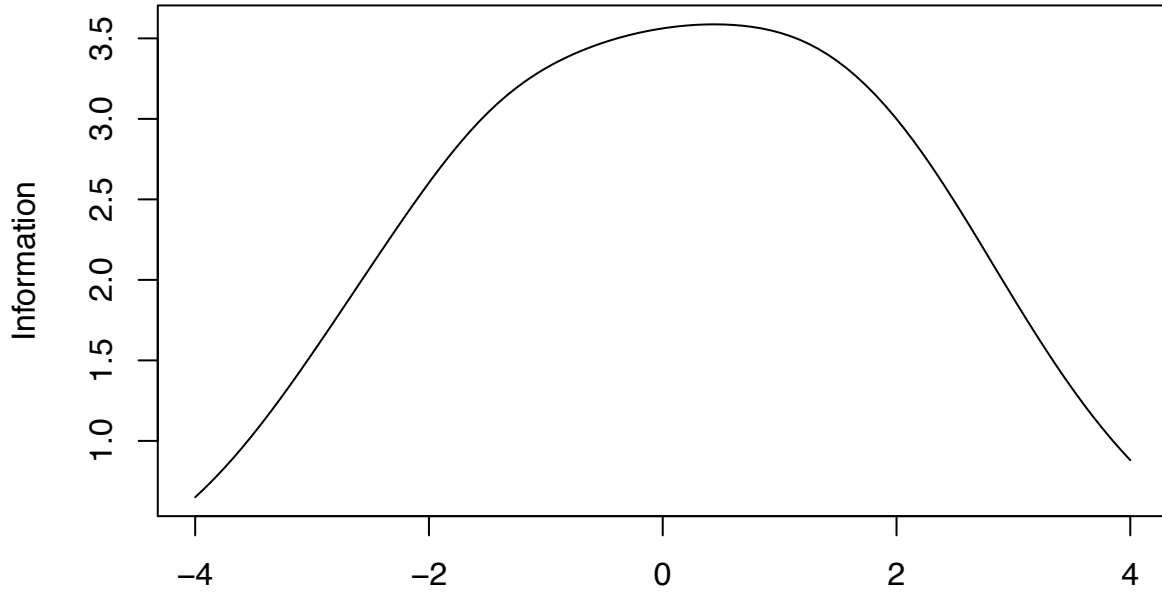

### Item Information Curves

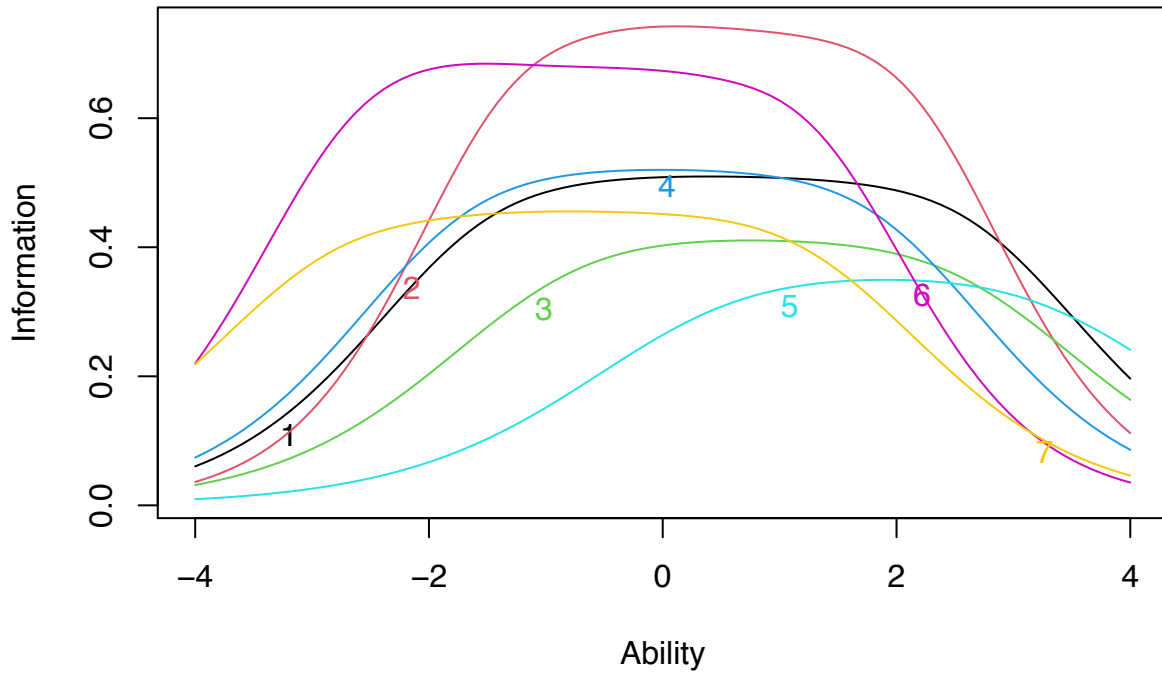

### Gender-based DIF: Perfectionism

```
## Call:  
## lordif::lordif(resp.data = as.data.frame(sex.data), group = sex)
```

```
##
## Number of DIF groups: 2
##
## Number of items flagged for DIF: 2 of 7
##
## Items flagged: 2, 3
##
## Number of iterations for purification: 2 of 10
##
## Detection criterion: Chisqr
##
## Threshold: alpha = 0.01
##
## item ncat chi12 chi13 chi23
## 1 1 7 0.1771 0.3950 0.8489
## 2 2 7 0.0000 0.0001 0.6397
## 3 3 7 0.0000 0.0000 0.2082
## 4 4 7 0.5884 0.2817 0.1344
## 5 5 7 0.0324 0.0789 0.4790
## 6 6 7 0.1503 0.1989 0.2813
## 7 7 7 0.0309 0.0972 0.9456
```

### Trait Distributions

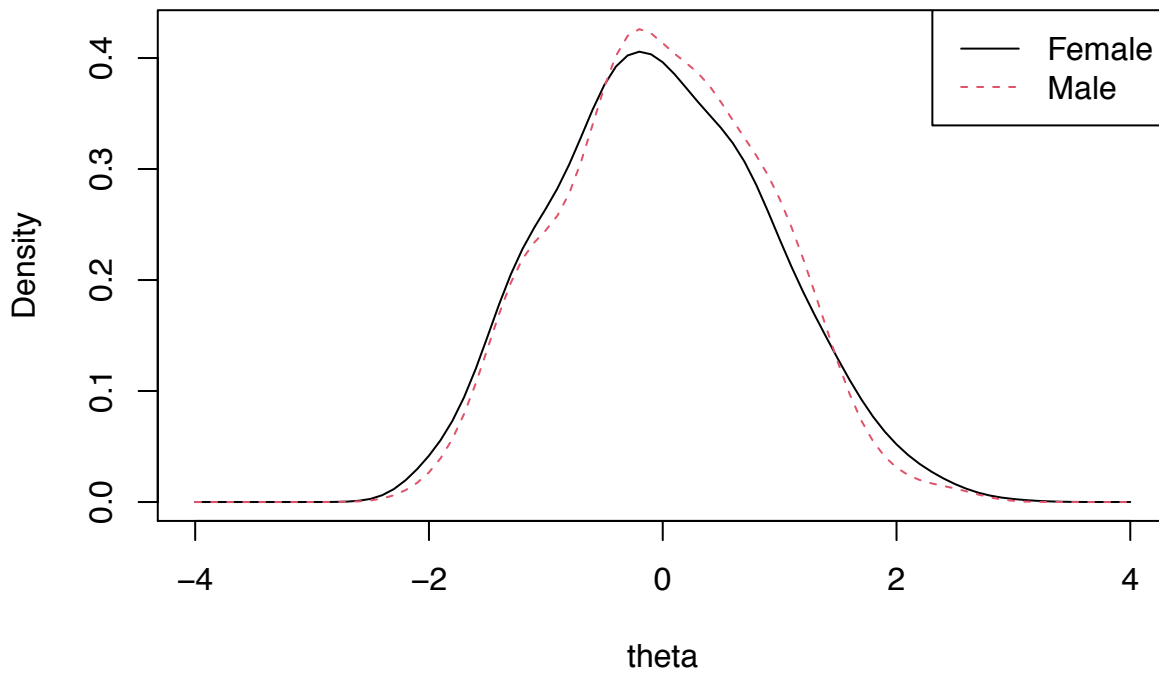



### Item True Score Functions – Item 2

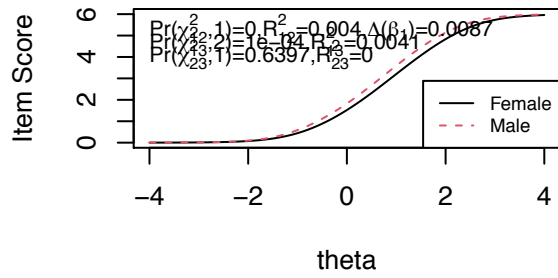

### Differences in Item True Score Function

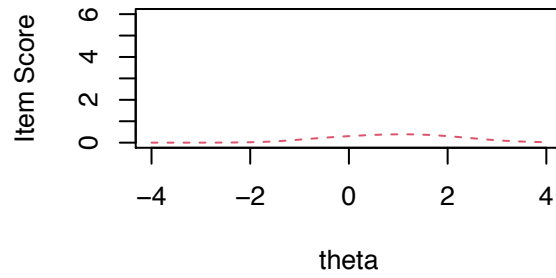

### Item Response Functions

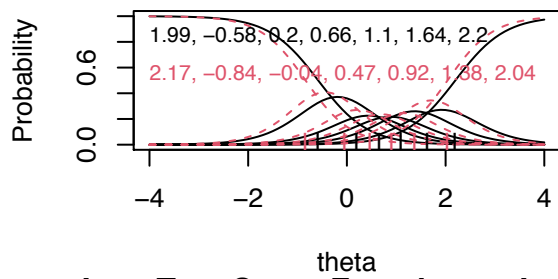

### Impact (Weighted by Density)

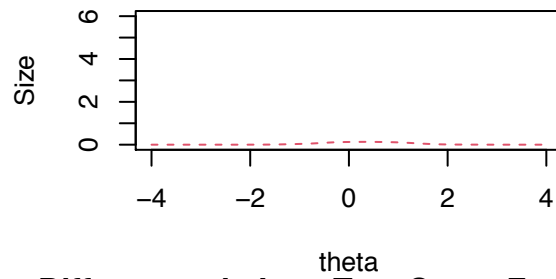

### Item True Score Functions – Item 3

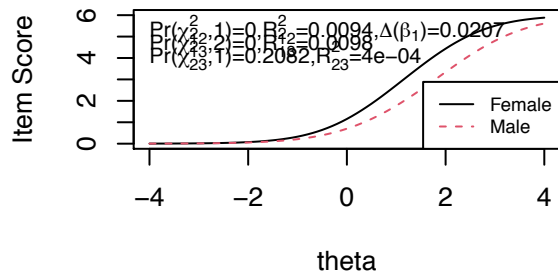

### Differences in Item True Score Function

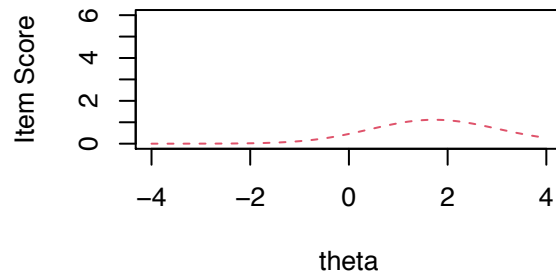

### Item Response Functions

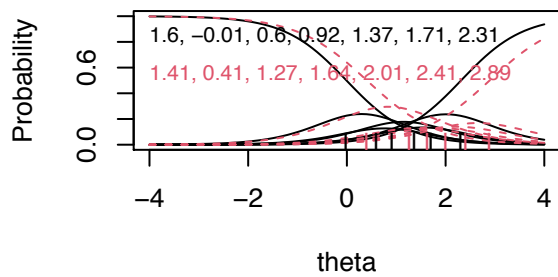

### Impact (Weighted by Density)

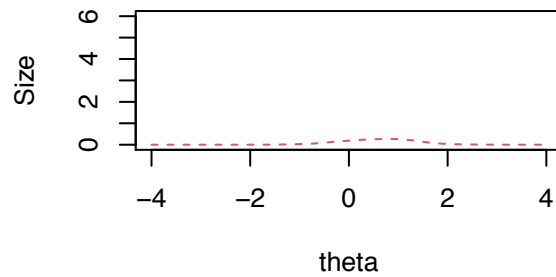

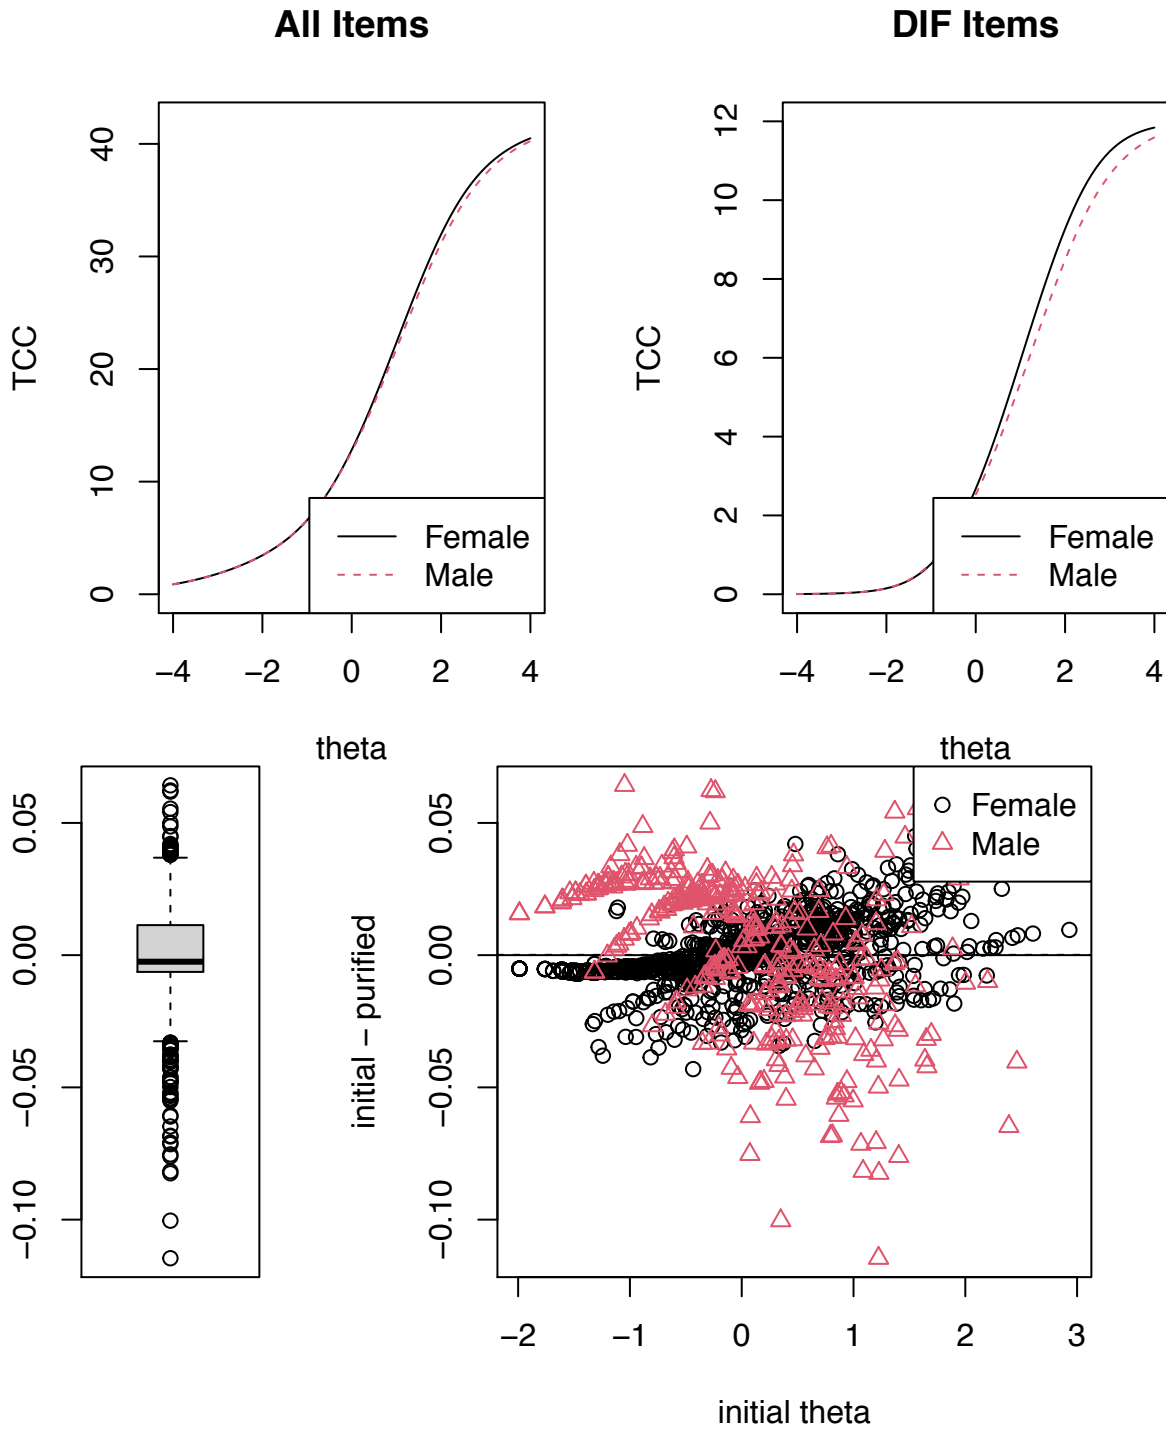

**Sample-based DIF: Perfectionism**

```
## Call:
## lordif::lordif(resp.data = as.data.frame(sample.data), group = clinYN)
##
## Number of DIF groups: 2
##
```

```
## Number of items flagged for DIF: 2 of 7
##
## Items flagged: 3, 4
##
## Number of iterations for purification: 3 of 10
##
## Detection criterion: Chisqr
##
## Threshold: alpha = 0.01
##
## item ncat chi12 chi13 chi23
## 1 1 7 0.2801 0.0341 0.0180
## 2 2 7 0.9059 0.9648 0.8102
## 3 3 7 0.0000 0.0000 0.0000
## 4 4 7 0.0000 0.0000 0.0000
## 5 5 7 0.0179 0.0606 0.9653
## 6 6 7 0.0406 0.0306 0.0954
## 7 7 7 0.0436 0.1056 0.5156
```

### Trait Distributions

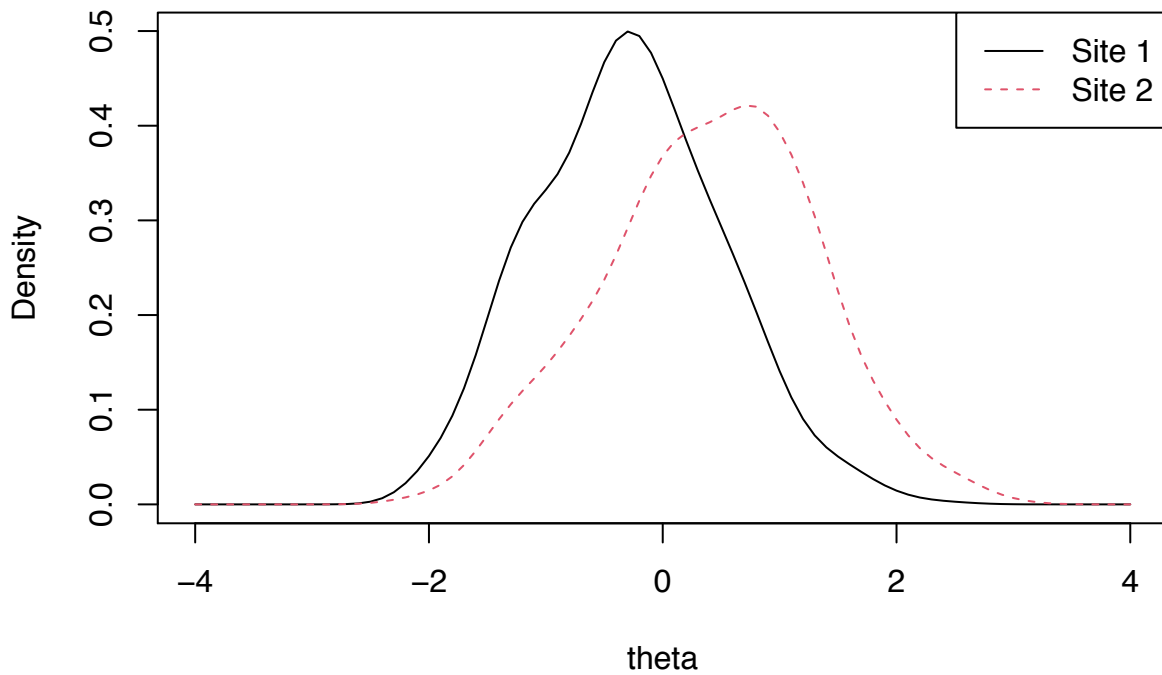

### Item True Score Functions – Item 3

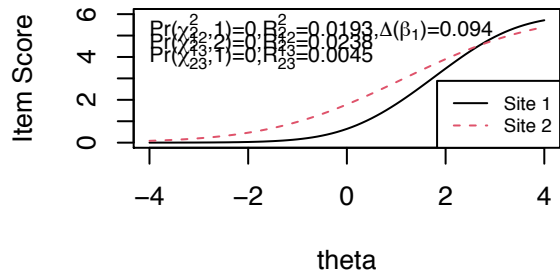

### Differences in Item True Score Function

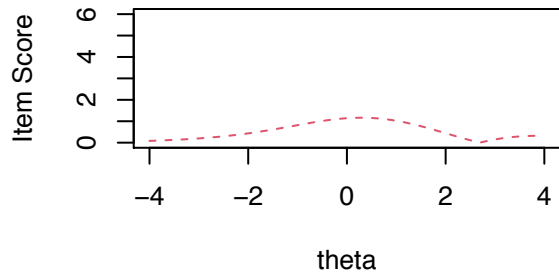

### Item Response Functions

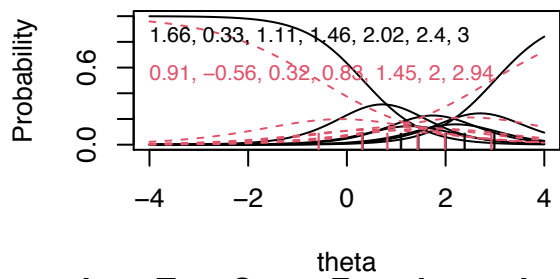

### Impact (Weighted by Density)

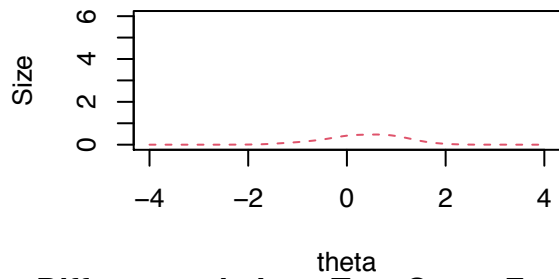

### Item True Score Functions – Item 4

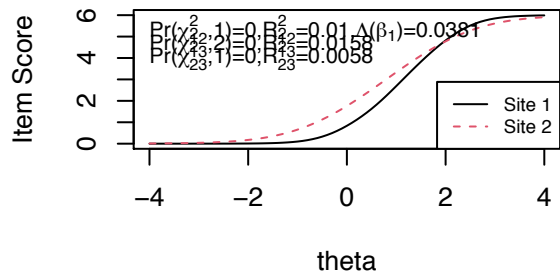

### Differences in Item True Score Function

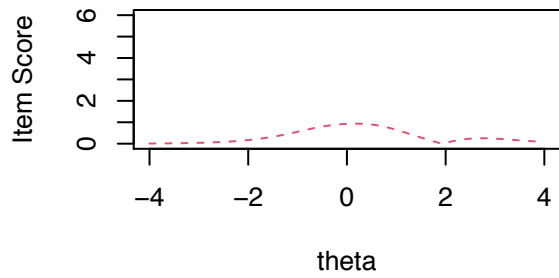

### Item Response Functions

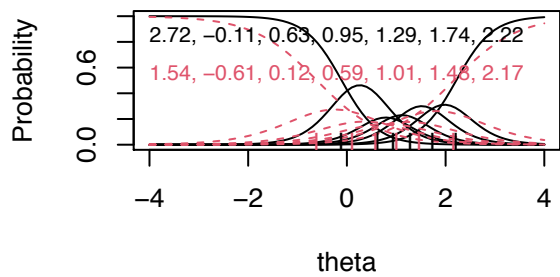

### Impact (Weighted by Density)

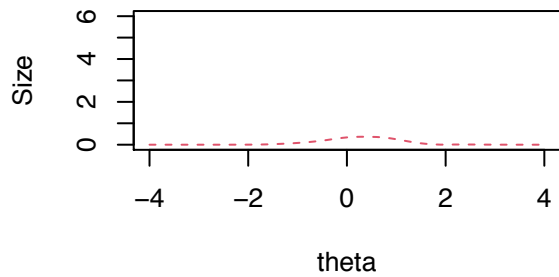

**All Items**

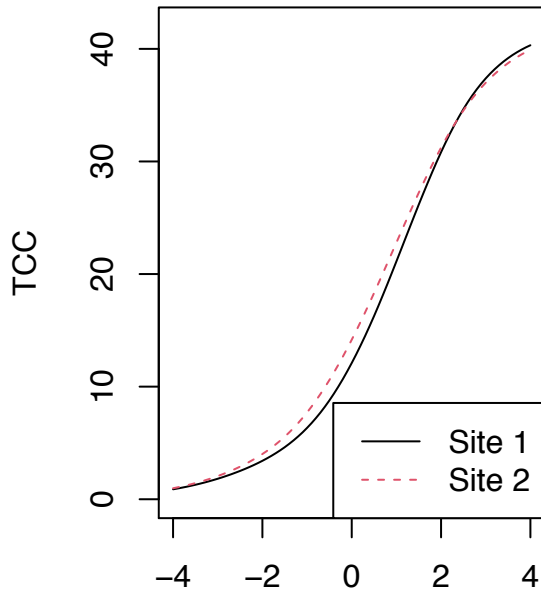

**DIF Items**

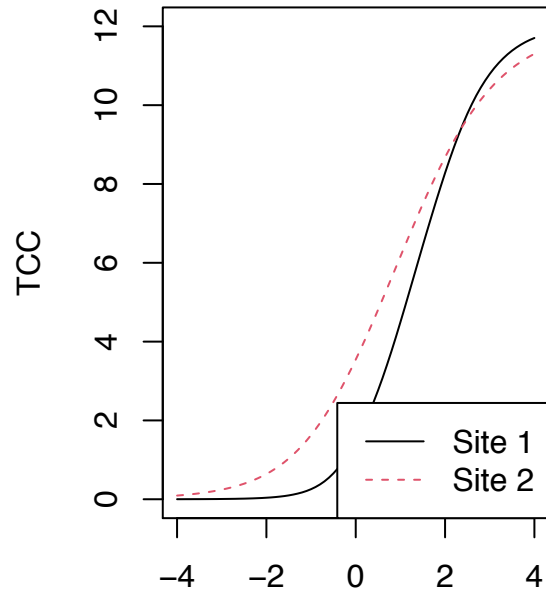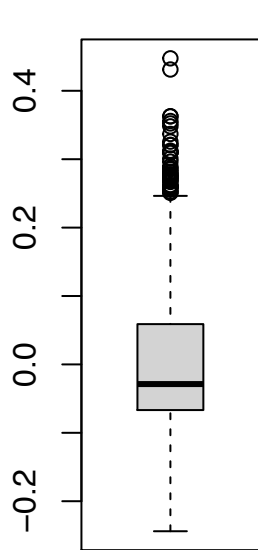

theta

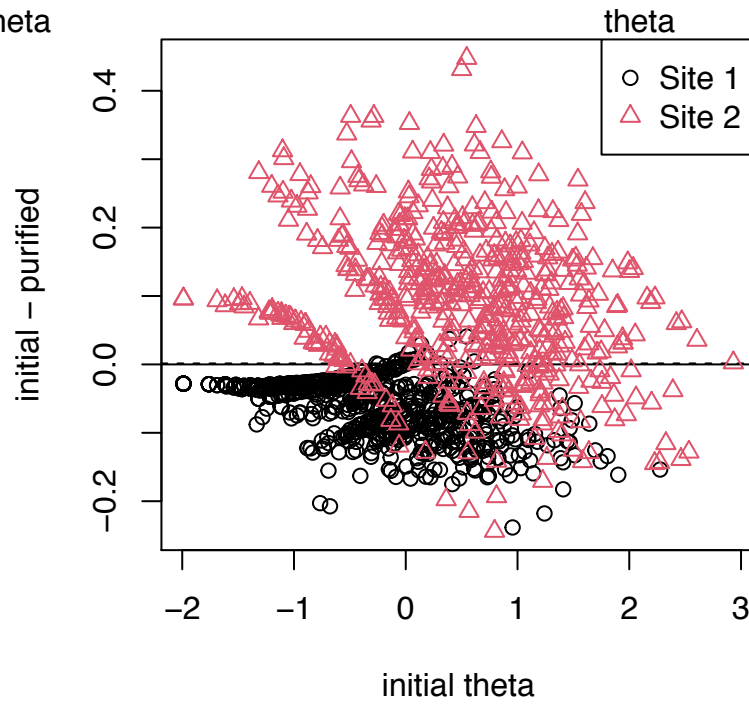

theta

[Back to top](#)

## Psychosis

### Reliability: Psychosis

## Cronbach's alpha is 0.416.  
## Mean item-total correlation is 0.202.

```
## If each item were dropped:
##   raw_alpha std.alpha G6(smc) average_r S/N alpha se var.r med.r
## Q58    0.27    0.28    0.16    0.16 0.38    0.057    NA  0.16
## Q29    0.28    0.29    0.17    0.17 0.40    0.057    NA  0.17
## Q49    0.40    0.43    0.28    0.28 0.76    0.044    NA  0.28
```

Unidimensionality: Psychosis

### Scree Plot

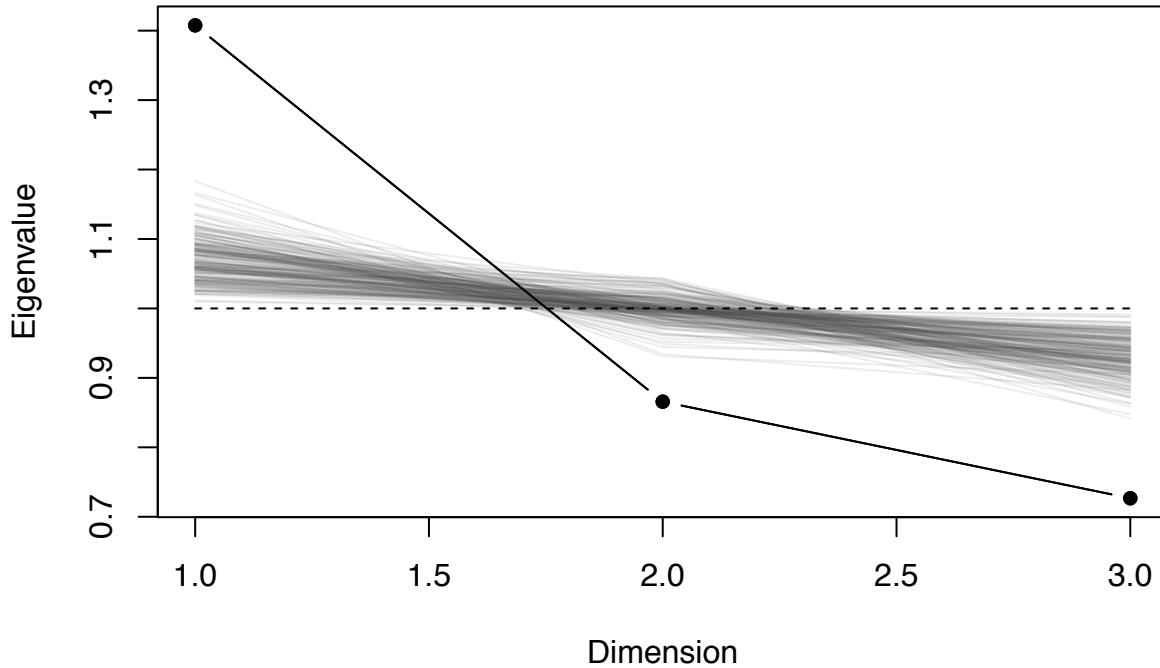

```
## [1] "Ratio of first to second eigenvalues: 1.626"
```

```
## [1] 1.4076462 0.8657056 0.7266482
```

```
## Factor Analysis using method = minres
```

```
## Call: fa(r = grm_obj$X)
```

```
## Standardized loadings (pattern matrix) based upon correlation matrix
```

```
##      MR1  h2  u2 com
```

```
## Q58 0.54 0.29 0.71  1
```

```
## Q29 0.51 0.26 0.74  1
```

```
## Q49 0.32 0.10 0.90  1
```

```
##
```

```
##              MR1
```

```
## SS loadings  0.65
```

```
## Proportion Var 0.22
```

```
##
```

```
## Mean item complexity = 1
```

```
## Test of the hypothesis that 1 factor is sufficient.
```

```
##
```

```
## The degrees of freedom for the null model are 3 and the objective function was 0.12 with Chi Squa
```

```
## The degrees of freedom for the model are 0 and the objective function was 0
```

```
##
```

```

## The root mean square of the residuals (RMSR) is 0
## The df corrected root mean square of the residuals is NA
##
## The harmonic number of observations is 595 with the empirical chi square 0 with prob < NA
## The total number of observations was 619 with Likelihood Chi Square = 0 with prob < NA
##
## Tucker Lewis Index of factoring reliability = -Inf
## Fit based upon off diagonal values = 1
## Measures of factor score adequacy
##
##                                     MR1
## Correlation of (regression) scores with factors    0.68
## Multiple R square of scores with factors           0.46
## Minimum correlation of possible factor scores      -0.07

```

**Graded-Response Model: Psychosis**

```

##      Extrmt1 Extrmt2 Extrmt3 Extrmt4 Extrmt5 Extrmt6 Dscrmn
## Q58 -0.406  -0.982  -1.329  -1.636  -2.119  -2.544  -1.464
## Q29 -1.460  -1.887  -2.119  -2.495  -2.699  -2.981  -1.767
## Q49 -1.286  -2.119  -2.741  -3.447  -4.359  -5.238  -0.729

```

**Test Information Function**

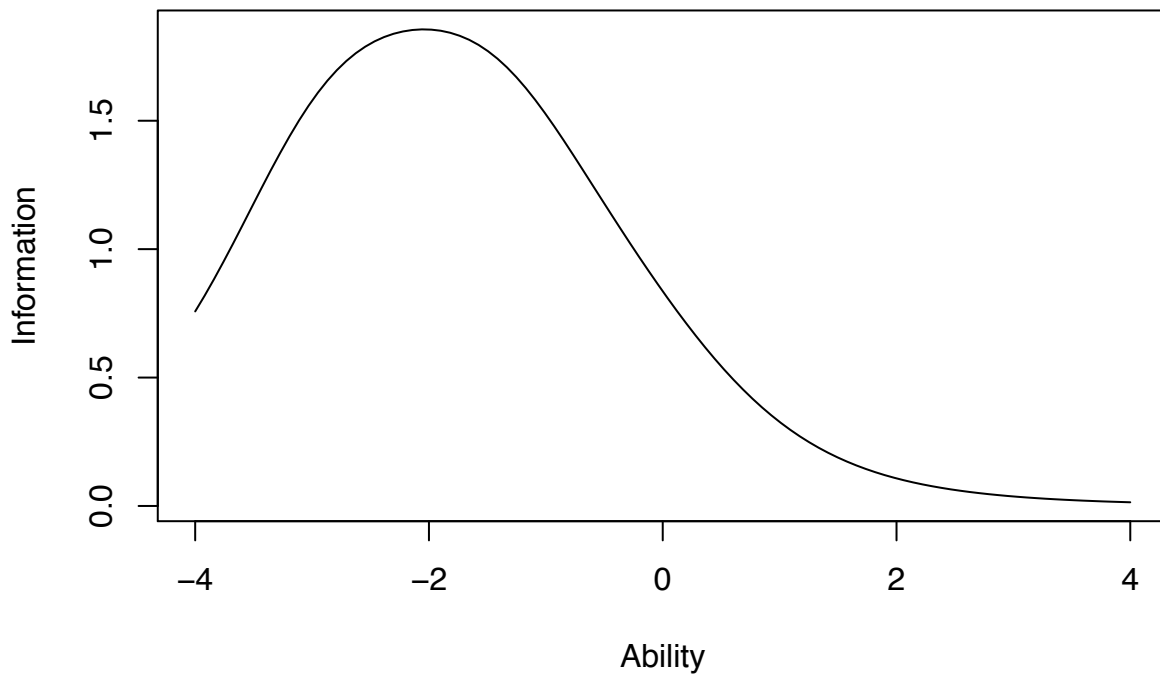

## Item Information Curves

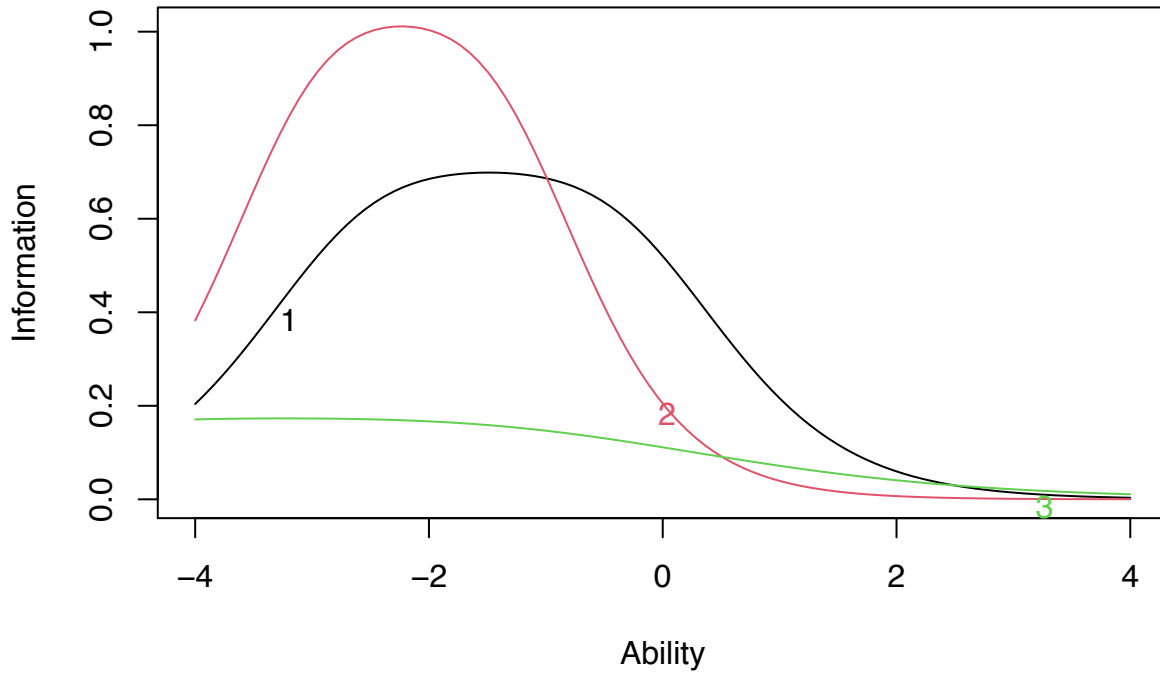

### Gender-based DIF: Psychosis

## No Gender-based DIF detected

### Sample-based DIF: Psychosis

## No Sample-based DIF detected

[Back to top](#)

## Relational Distress

### Reliability: Relational Distress

## Cronbach's alpha is 0.746.

## Mean item-total correlation is 0.296.

## If each item were dropped:

| ##      | raw_alpha | std.alpha | G6(smc) | average_r | S/N | alpha | se     | var.r | med.r |
|---------|-----------|-----------|---------|-----------|-----|-------|--------|-------|-------|
| ## Q81  | 0.69      | 0.69      | 0.67    | 0.27      | 2.3 | 0.019 | 0.0086 | 0.26  |       |
| ## Q25  | 0.73      | 0.73      | 0.71    | 0.31      | 2.7 | 0.017 | 0.0062 | 0.31  |       |
| ## Q36  | 0.70      | 0.70      | 0.68    | 0.28      | 2.4 | 0.018 | 0.0092 | 0.29  |       |
| ## Q37  | 0.71      | 0.70      | 0.68    | 0.28      | 2.4 | 0.018 | 0.0087 | 0.29  |       |
| ## Q65  | 0.72      | 0.72      | 0.70    | 0.30      | 2.6 | 0.017 | 0.0078 | 0.31  |       |
| ## Q66  | 0.74      | 0.74      | 0.72    | 0.33      | 2.9 | 0.016 | 0.0063 | 0.35  |       |
| ## Q69- | 0.71      | 0.71      | 0.69    | 0.29      | 2.4 | 0.018 | 0.0078 | 0.31  |       |



Unidimensionality: Relational Distress

### Scree Plot

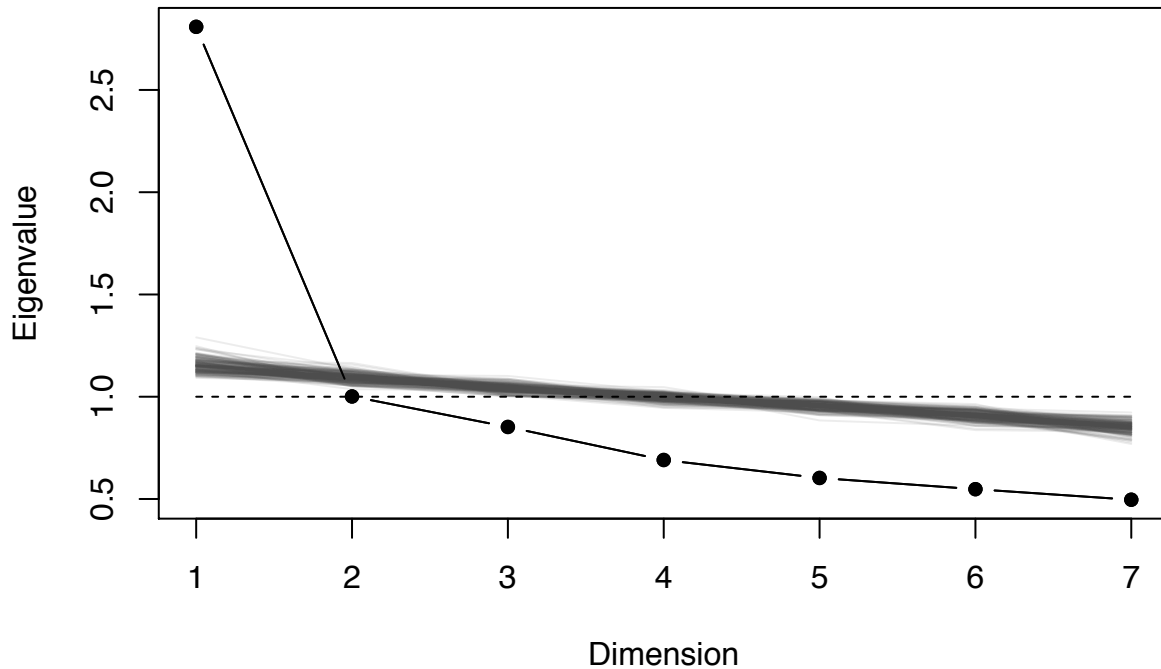

```
## [1] "Ratio of first to second eigenvalues: 2.805"  
## [1] 2.8086127 1.0013286 0.8522043 0.6906615 0.6028426 0.5479389 0.4964113  
## Factor Analysis using method = minres  
## Call: fa(r = grm_obj$X)  
## Standardized loadings (pattern matrix) based upon correlation matrix  
##      MR1  h2  u2 com  
## Q81  0.65 0.43 0.57  1  
## Q25  0.46 0.21 0.79  1  
## Q36  0.62 0.38 0.62  1  
## Q37  0.60 0.36 0.64  1  
## Q65  0.51 0.26 0.74  1  
## Q66  0.40 0.16 0.84  1  
## Q69 -0.58 0.34 0.66  1  
##  
##              MR1  
## SS loadings  2.14  
## Proportion Var 0.31  
##  
## Mean item complexity = 1  
## Test of the hypothesis that 1 factor is sufficient.  
##  
## The degrees of freedom for the null model are 21 and the objective function was 1.3 with Chi Squar  
## The degrees of freedom for the model are 14 and the objective function was 0.14  
##  
## The root mean square of the residuals (RMSR) is 0.06  
## The df corrected root mean square of the residuals is 0.07
```

```

##
## The harmonic number of observations is 594 with the empirical chi square 86.05 with prob < 2.1e-
## The total number of observations was 619 with Likelihood Chi Square = 87.49 with prob < 1.1e-12
##
## Tucker Lewis Index of factoring reliability = 0.859
## RMSEA index = 0.092 and the 90 % confidence intervals are 0.074 0.111
## BIC = -2.51
## Fit based upon off diagonal values = 0.96
## Measures of factor score adequacy
##
##                                     MR1
## Correlation of (regression) scores with factors 0.87
## Multiple R square of scores with factors 0.77
## Minimum correlation of possible factor scores 0.53

```

**Graded-Response Model: Relational Distress**

| ##     | Extrmt1 | Extrmt2 | Extrmt3 | Extrmt4 | Extrmt5 | Extrmt6 | Dscrmn |
|--------|---------|---------|---------|---------|---------|---------|--------|
| ## Q81 | -1.595  | -0.899  | -0.348  | 0.204   | 0.742   | 1.405   | 1.690  |
| ## Q25 | -2.363  | -1.454  | -0.766  | -0.212  | 0.453   | 1.275   | 1.051  |
| ## Q36 | -0.286  | 0.325   | 0.725   | 1.267   | 1.832   | 2.431   | 1.751  |
| ## Q37 | -1.469  | -0.390  | 0.249   | 0.870   | 1.409   | 2.158   | 1.439  |
| ## Q65 | -0.140  | 0.967   | 1.539   | 2.143   | 2.848   | 3.685   | 1.237  |
| ## Q66 | -0.140  | 0.740   | 1.328   | 2.107   | 2.956   | 3.634   | 0.980  |
| ## Q69 | 1.602   | 0.937   | 0.404   | -0.283  | -0.741  | -1.381  | -1.416 |

**Test Information Function**

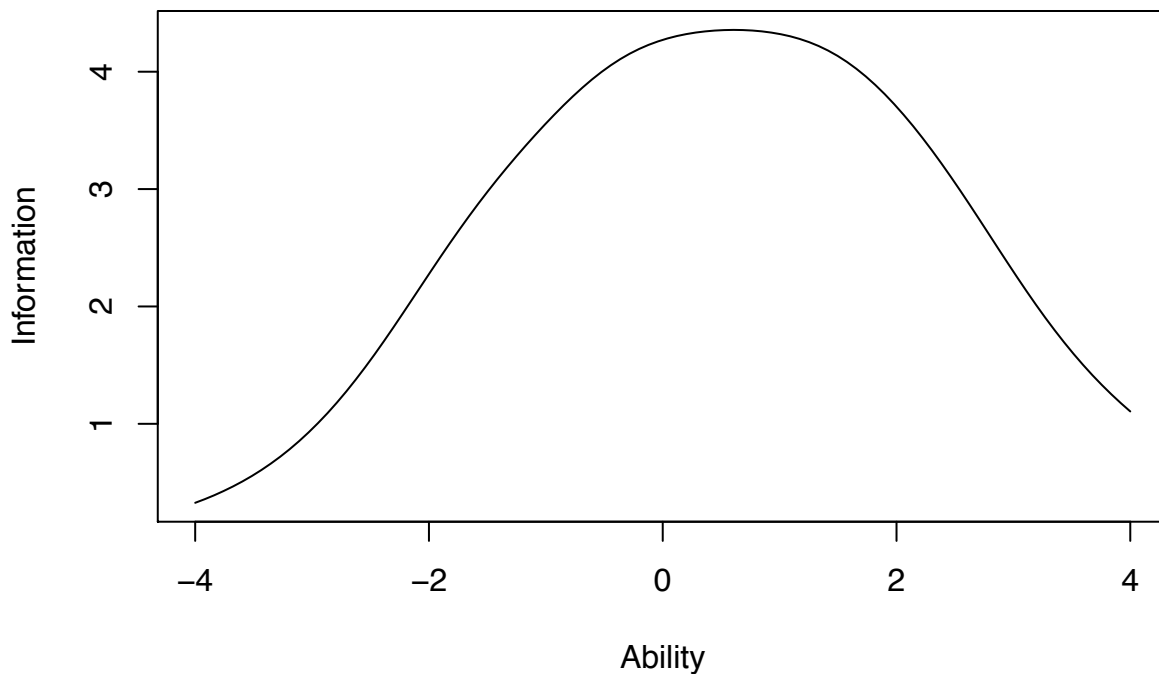

## Item Information Curves

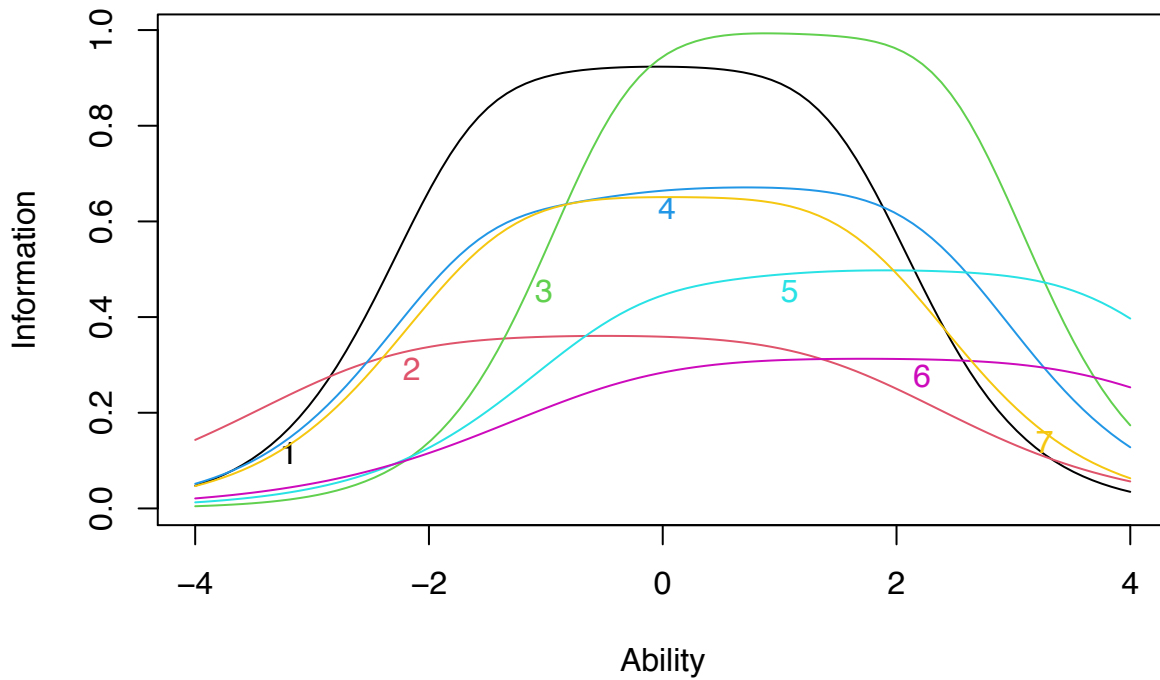

### Gender-based DIF: Relational Distress

```
## Call:
## lordif::lordif(resp.data = as.data.frame(sex.data), group = sex)
##
##   Number of DIF groups: 2
##
##   Number of items flagged for DIF: 2 of 7
##
##   Items flagged: 2, 6
##
##   Number of iterations for purification: 2 of 10
##
##   Detection criterion: Chisqr
##
##   Threshold: alpha = 0.01
##
##   item ncat  chi12  chi13  chi23
## 1     1     7 0.3710 0.6647 0.8975
## 2     2     7 0.0000 0.0000 0.1495
## 3     3     6 0.9503 0.9970 0.9624
## 4     4     7 0.2840 0.5578 0.8886
## 5     5     7 0.2566 0.4943 0.7266
## 6     6     7 0.0000 0.0000 0.5641
## 7     7     7 0.8048 0.0858 0.0277
```

## Trait Distributions

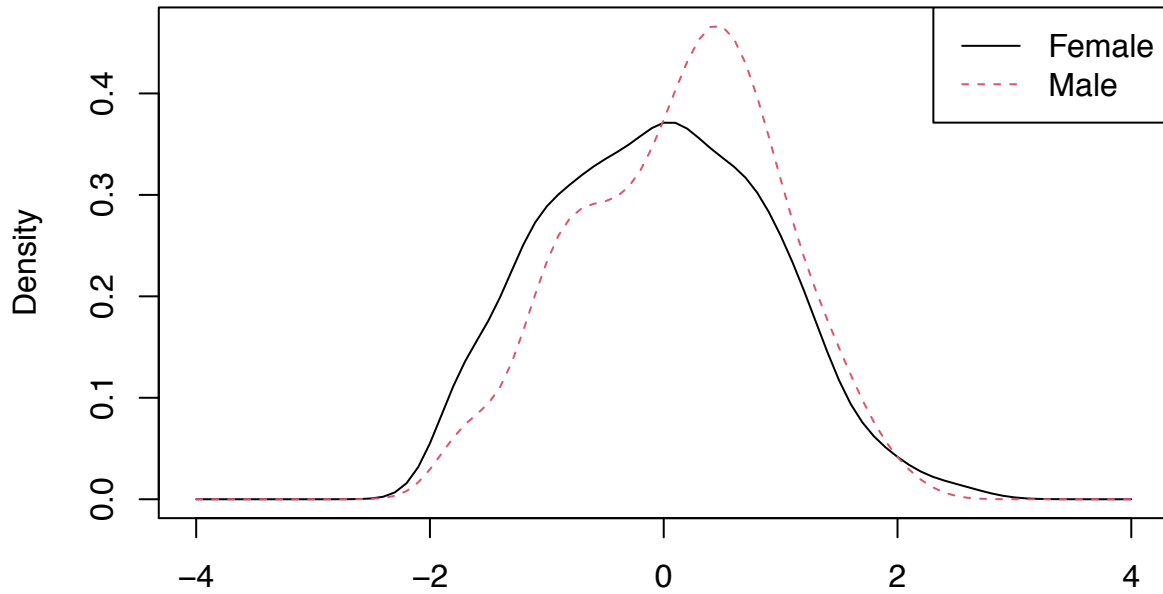

## Item True Score Functions – Item 2 Differences in Item True Score Function

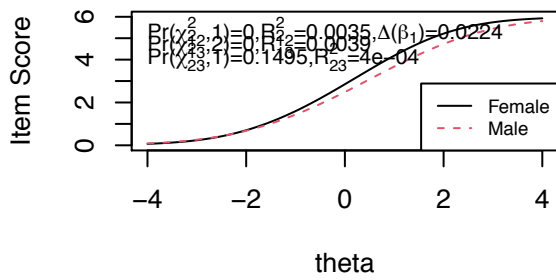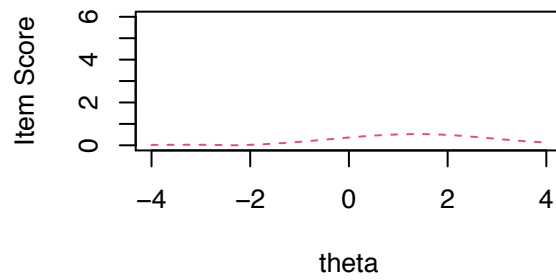

## Item Response Functions

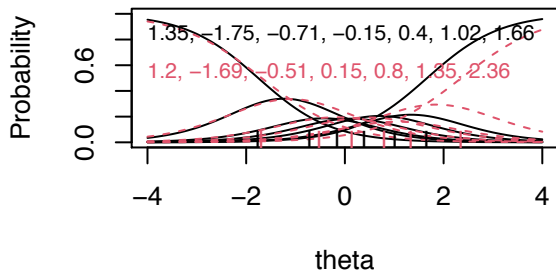

## Impact (Weighted by Density)

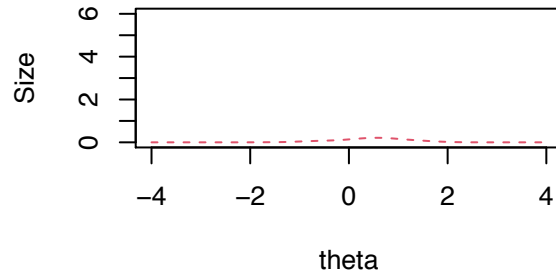

### Item True Score Functions – Item 6

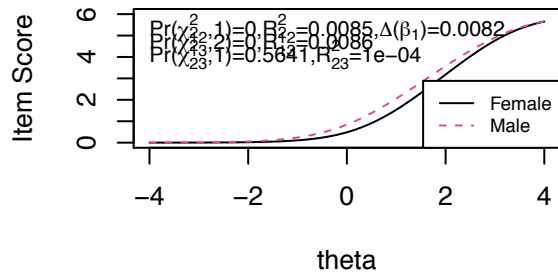

### Differences in Item True Score Function

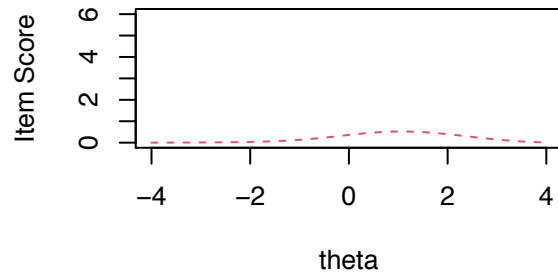

### Item Response Functions

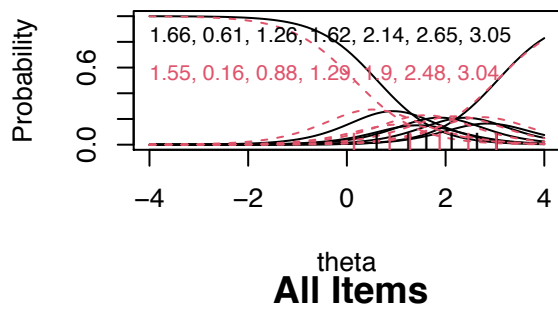

### Impact (Weighted by Density)

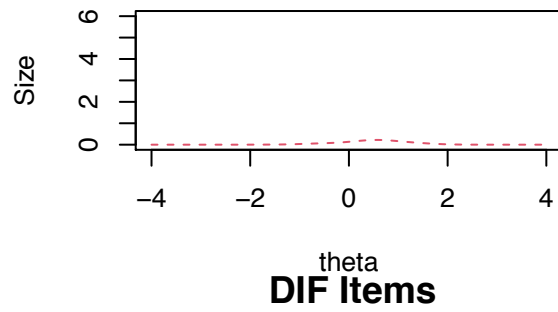

theta  
**All Items**

theta  
**DIF Items**

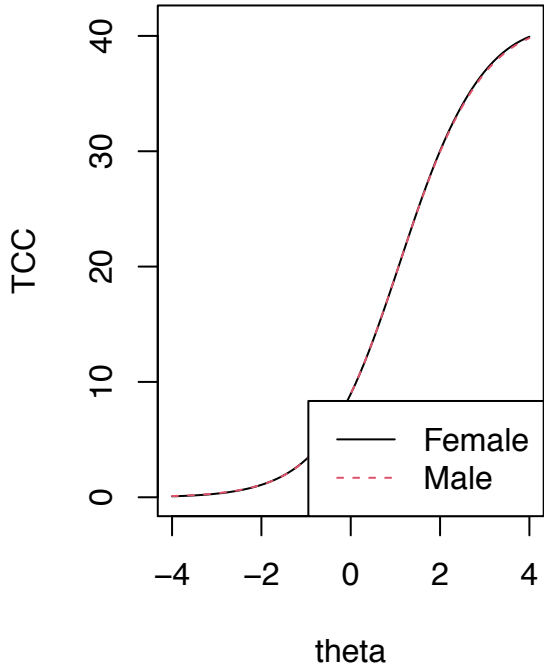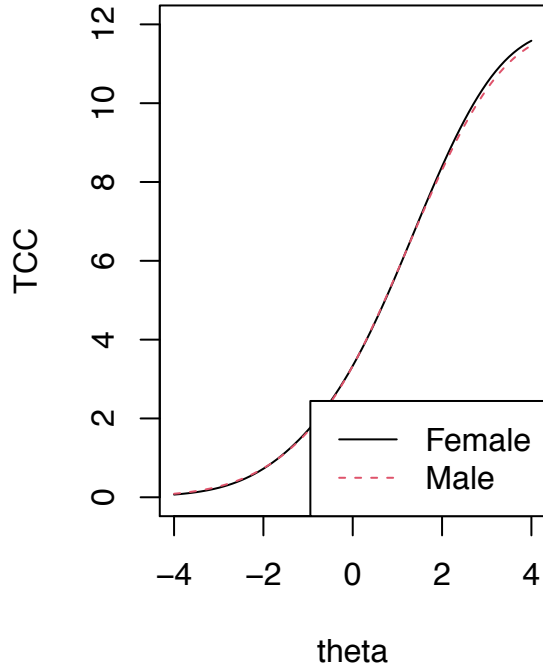

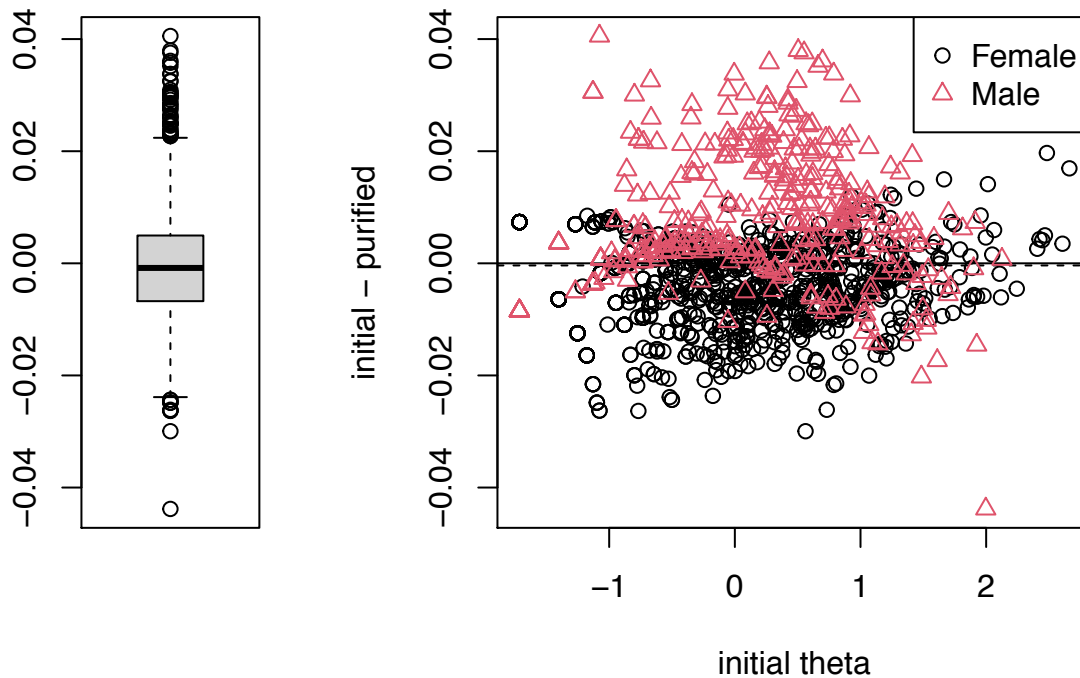

### Sample-based DIF: Relational Distress

```
## Call:
## lordif::lordif(resp.data = as.data.frame(sample.data), group = clinYN)
##
##   Number of DIF groups: 2
##
##   Number of items flagged for DIF: 7 of 7
##
##   Items flagged: 1, 2, 3, 4, 5, 6, 7
##
##   Number of iterations for purification: 4 of 10
##
##   Detection criterion: Chisqr
##
##   Threshold: alpha = 0.01
##
##   item ncat chi12 chi13 chi23
## 1     1     7     0     0 0.0014
## 2     2     7     0     0 0.0714
## 3     3     6     0     0 0.3496
## 4     4     7     0     0 0.0203
## 5     5     5     0     0 0.0070
## 6     6     7     0     0 0.0000
## 7     7     7     0     0 0.6452
```

Back to top

## Resilience

### Reliability: Resilience

```
## Cronbach's alpha is 0.768.
## Mean item-total correlation is 0.218.
## If each item were dropped:
##      raw_alpha std.alpha G6(sm) average_r S/N alpha se var.r med.r
## Q27-   0.75     0.75   0.76     0.22 3.0   0.015 0.011 0.21
## Q6     0.75     0.75   0.76     0.21 3.0   0.015 0.011 0.21
## Q15    0.74     0.75   0.77     0.21 3.0   0.015 0.014 0.20
## Q22    0.74     0.74   0.76     0.21 2.9   0.015 0.014 0.20
## Q33-   0.76     0.76   0.78     0.22 3.2   0.014 0.014 0.21
## Q40    0.75     0.75   0.77     0.21 3.0   0.015 0.014 0.21
## Q55    0.78     0.78   0.80     0.24 3.5   0.013 0.011 0.23
## Q56    0.76     0.76   0.77     0.23 3.2   0.014 0.012 0.22
## Q67    0.74     0.74   0.77     0.21 2.9   0.015 0.014 0.20
## Q70    0.76     0.76   0.78     0.22 3.2   0.014 0.014 0.21
## Q84    0.75     0.75   0.76     0.22 3.0   0.015 0.013 0.21
## Q89    0.75     0.75   0.77     0.21 2.9   0.015 0.013 0.21
```

### Unidimensionality: Resilience

#### Scree Plot

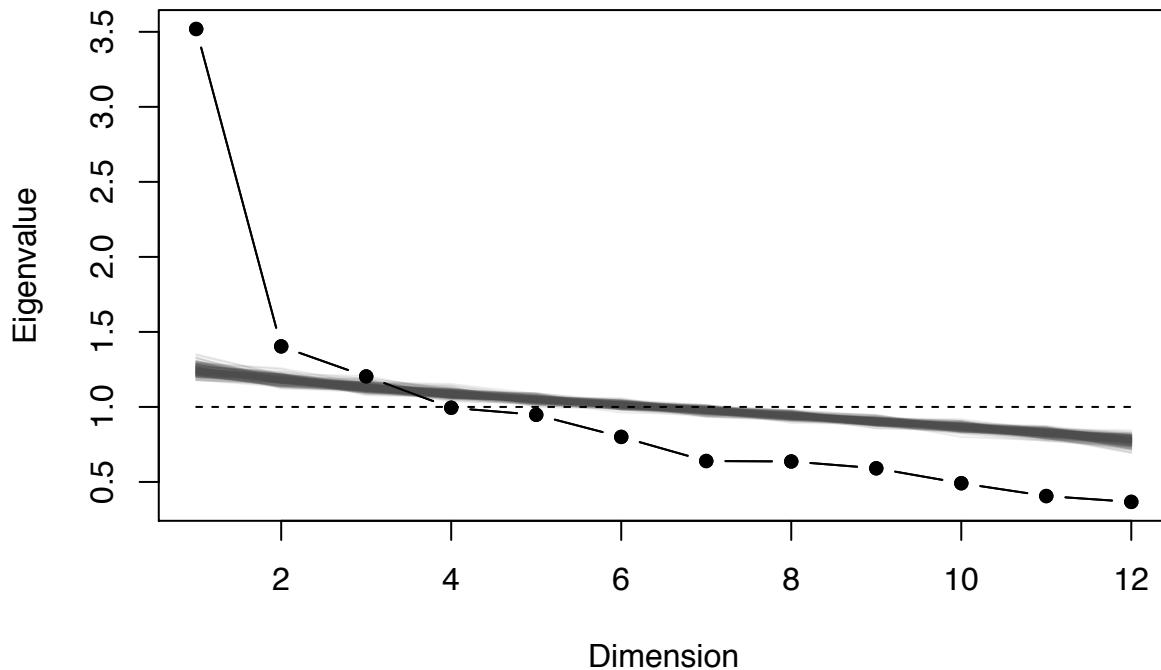

```
## [1] "Ratio of first to second eigenvalues: 2.507"
## [1] 3.5189340 1.4035499 1.2032386 0.9944428 0.9475198 0.8002591 0.6395633
## [8] 0.6366297 0.5910327 0.4915612 0.4061040 0.3671649
## Factor Analysis using method = minres
## Call: fa(r = grm_obj$X)
```

```

## Standardized loadings (pattern matrix) based upon correlation matrix
##      MR1      h2      u2 com
## Q27 -0.52 0.275 0.73  1
## Q6   0.54 0.290 0.71  1
## Q15  0.55 0.305 0.69  1
## Q22  0.56 0.312 0.69  1
## Q33 -0.41 0.166 0.83  1
## Q40  0.52 0.267 0.73  1
## Q55  0.18 0.033 0.97  1
## Q56  0.36 0.127 0.87  1
## Q67  0.57 0.325 0.67  1
## Q70  0.42 0.173 0.83  1
## Q84  0.46 0.210 0.79  1
## Q89  0.55 0.299 0.70  1
##
##              MR1
## SS loadings   2.78
## Proportion Var 0.23
##
## Mean item complexity = 1
## Test of the hypothesis that 1 factor is sufficient.
##
## The degrees of freedom for the null model are 66 and the objective function was 2.54 with Chi Squ
## The degrees of freedom for the model are 54 and the objective function was 0.87
##
## The root mean square of the residuals (RMSR) is 0.09
## The df corrected root mean square of the residuals is 0.1
##
## The harmonic number of observations is 553 with the empirical chi square 559.56 with prob < 3.5e
## The total number of observations was 619 with Likelihood Chi Square = 533.07 with prob < 5.7e-8
##
## Tucker Lewis Index of factoring reliability = 0.607
## RMSEA index = 0.12 and the 90 % confidence intervals are 0.111 0.129
## BIC = 185.96
## Fit based upon off diagonal values = 0.87
## Measures of factor score adequacy
##
##              MR1
## Correlation of (regression) scores with factors 0.89
## Multiple R square of scores with factors 0.79
## Minimum correlation of possible factor scores 0.58

```

### Graded-Response Model: Resilience

```

##      Extrmt1 Extrmt2 Extrmt3 Extrmt4 Extrmt5 Extrmt6 Dscrmn
## Q27  2.149   1.182   0.488  -0.160  -0.697  -1.553  -1.111
## Q6   -1.952  -1.231  -0.707  -0.117   0.466   1.401   1.168
## Q15  -2.479  -1.537  -0.933  -0.283   0.564   1.490   1.264
## Q22  -1.038  -0.183   0.532   1.178   1.647   2.257   1.341
## Q33   3.300   2.142   1.455   0.596  -0.479  -1.517  -0.823
## Q40  -1.664  -0.385   0.500   1.217   2.092   3.015   1.153
## Q55  -3.975  -1.878  -0.214   2.049   3.716   5.843   0.405
## Q56  -2.755  -1.713  -0.925   0.032   0.782   1.855   0.723
## Q67  -1.938  -1.317  -0.624   0.157   0.968   1.914   1.445

```



|    |     |        |        |        |       |       |       |       |
|----|-----|--------|--------|--------|-------|-------|-------|-------|
| ## | Q70 | -1.174 | -0.105 | 0.675  | 1.497 | 2.148 | 3.132 | 0.886 |
| ## | Q84 | -2.372 | -1.388 | -0.711 | 0.165 | 1.028 | 1.821 | 0.939 |
| ## | Q89 | -2.135 | -1.216 | -0.431 | 0.431 | 1.122 | 1.914 | 1.262 |

### Test Information Function

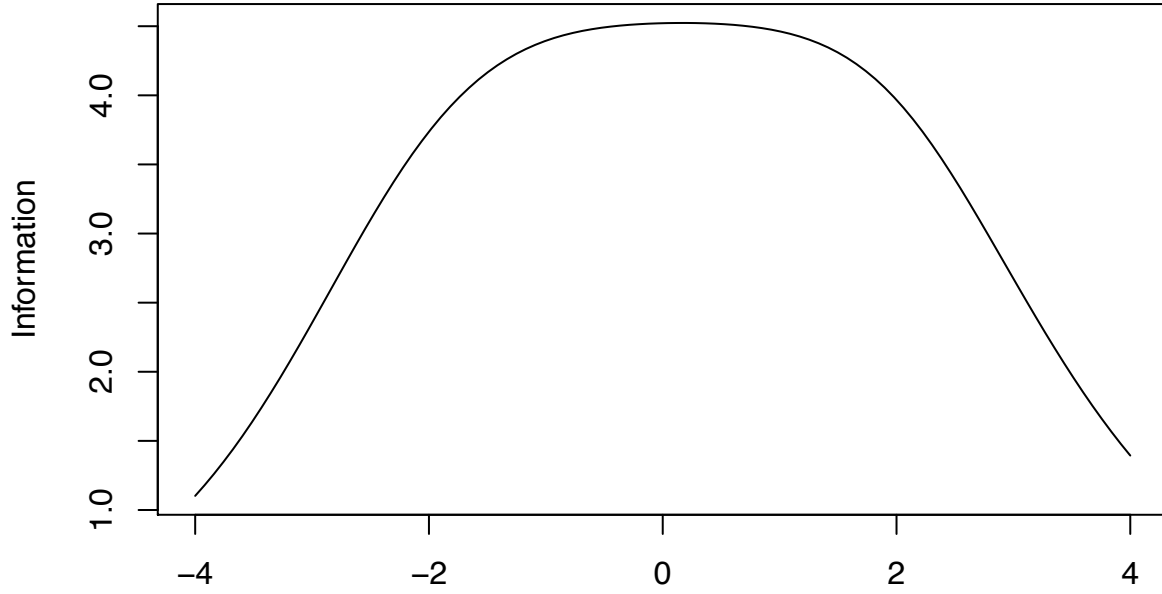

### Item Information Curves

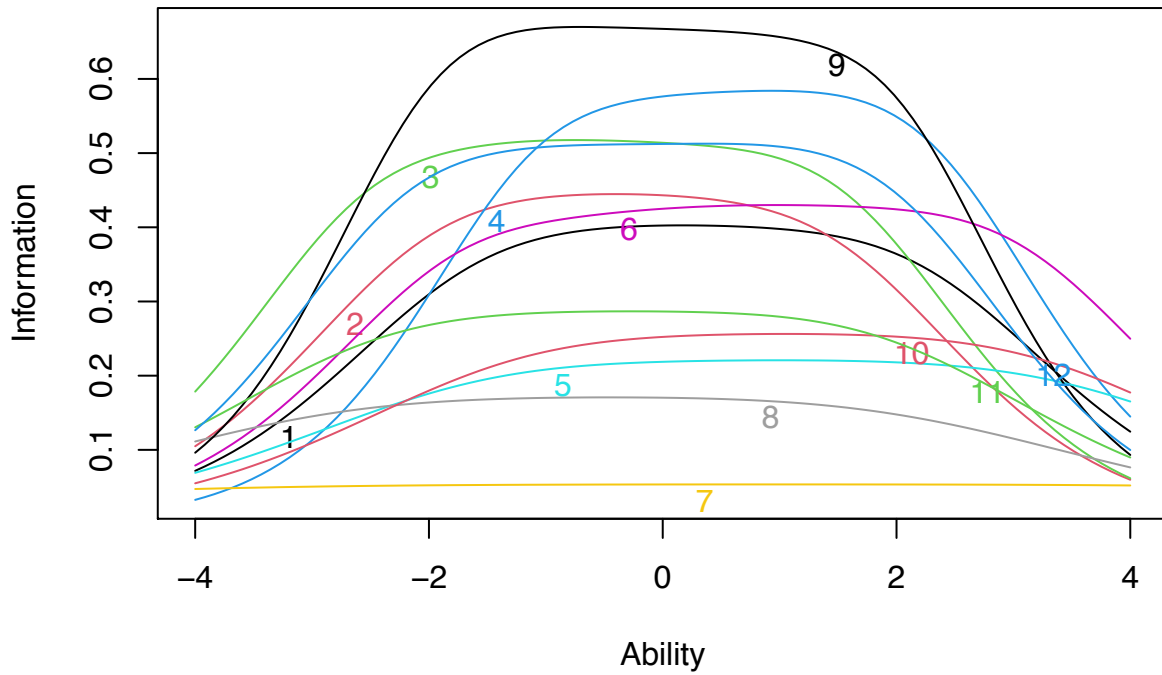

## Gender-based DIF: Resilience

```
## Call:
## lordif::lordif(resp.data = as.data.frame(sex.data), group = sex)
##
## Number of DIF groups: 2
##
## Number of items flagged for DIF: 3 of 12
##
## Items flagged: 2, 7, 8
##
## Number of iterations for purification: 2 of 10
##
## Detection criterion: Chisqr
##
## Threshold: alpha = 0.01
##
##   item ncat  chi12  chi13  chi23
## 1     1     7 0.4444 0.6752 0.6543
## 2     2     7 0.0000 0.0001 0.4558
## 3     3     7 0.0136 0.0355 0.4438
## 4     4     7 0.1324 0.1125 0.1468
## 5     5     7 0.3505 0.4547 0.4013
## 6     6     7 0.3245 0.5750 0.7125
## 7     7     7 0.0573 0.0007 0.0009
## 8     8     7 0.8336 0.0059 0.0014
## 9     9     7 0.5698 0.5684 0.3691
## 10    10    7 0.0709 0.1900 0.8094
## 11    11    7 0.0257 0.0299 0.1528
## 12    12    7 0.9439 0.9876 0.8874
```

### Trait Distributions

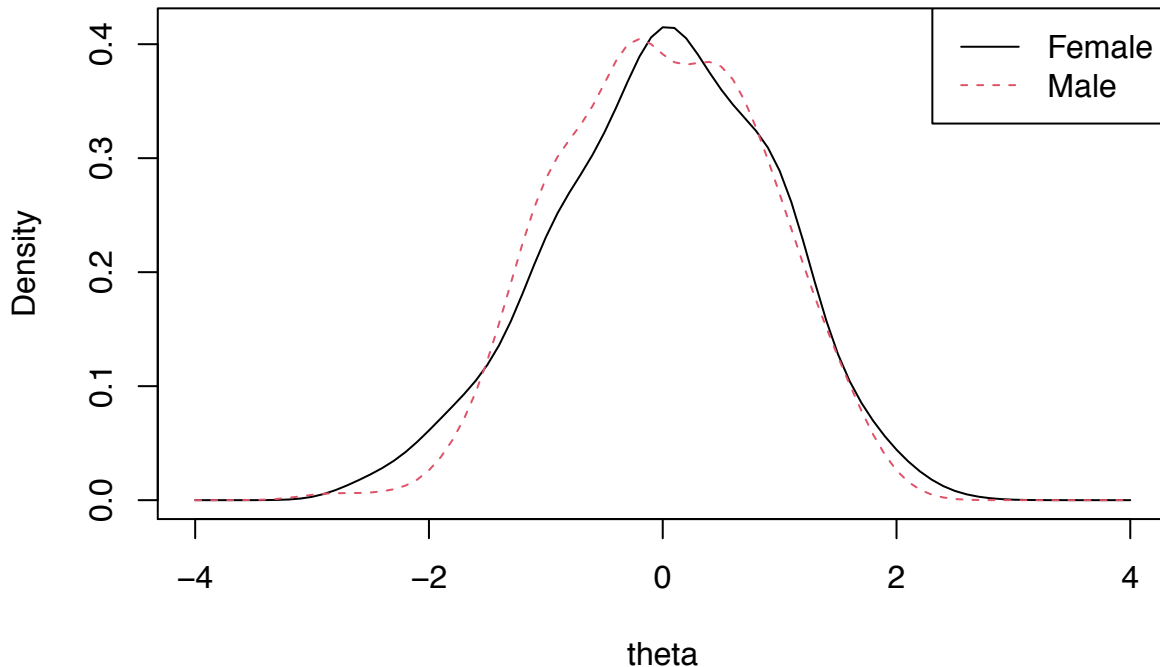

### Item True Score Functions – Item 2

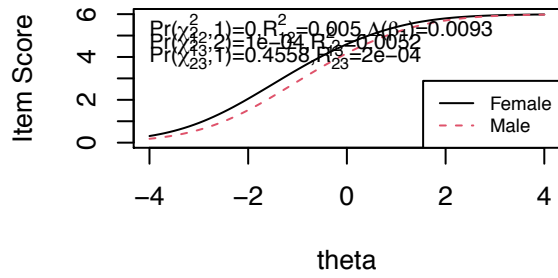

### Differences in Item True Score Function

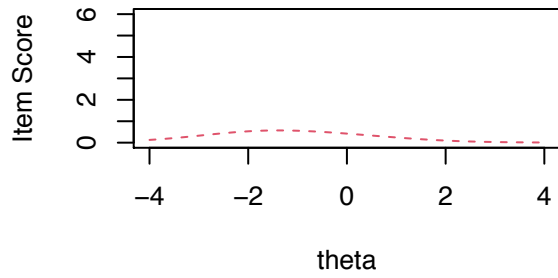

### Item Response Functions

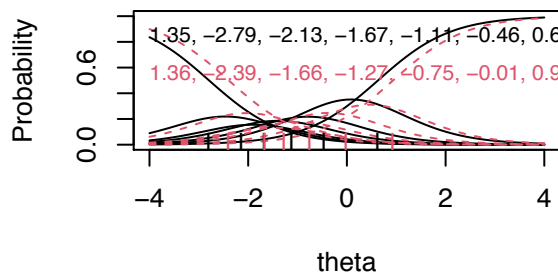

### Impact (Weighted by Density)

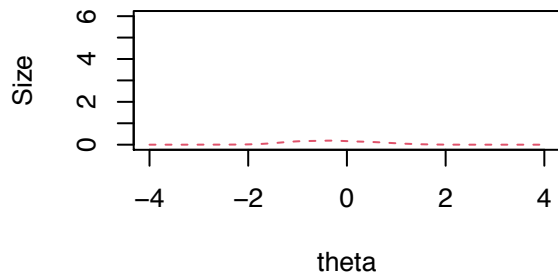

### Item True Score Functions – Item 7

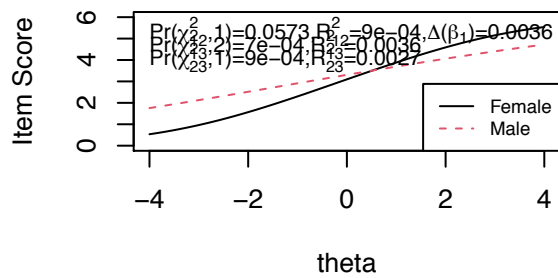

### Differences in Item True Score Function

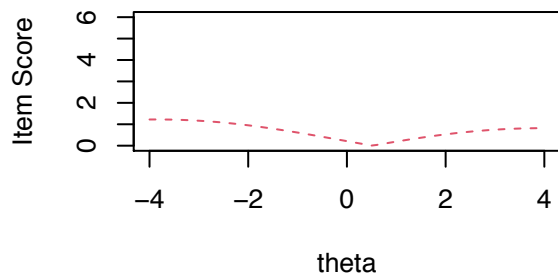

### Item Response Functions

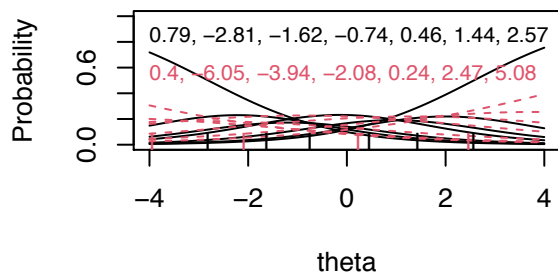

### Impact (Weighted by Density)

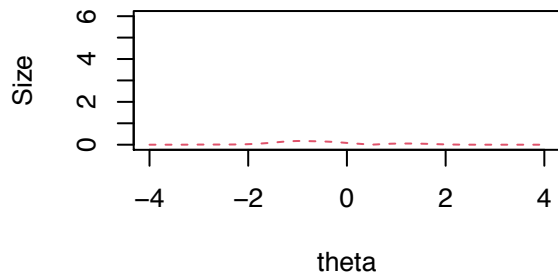

### Item True Score Functions – Item 8

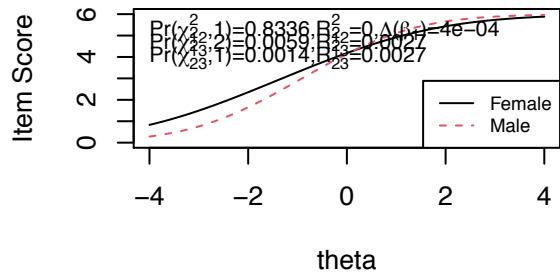

### Differences in Item True Score Function

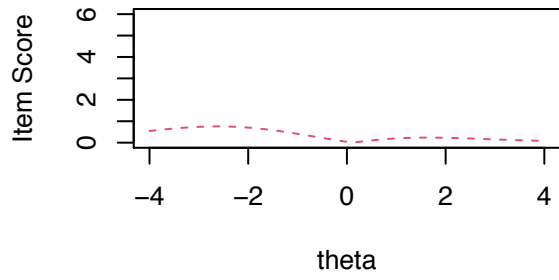

### Item Response Functions

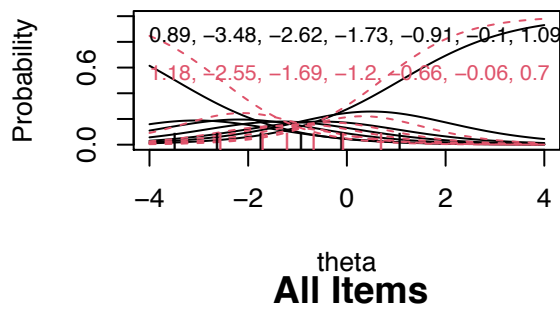

All Items

### Impact (Weighted by Density)

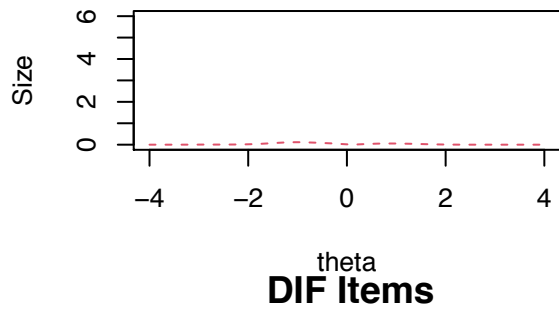

DIF Items

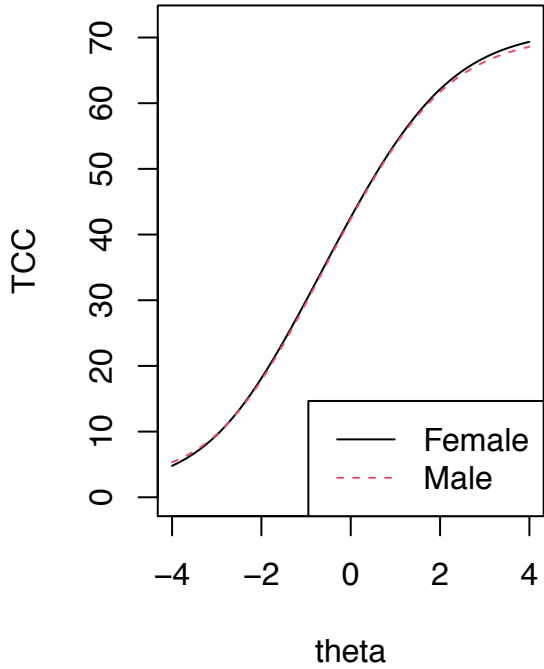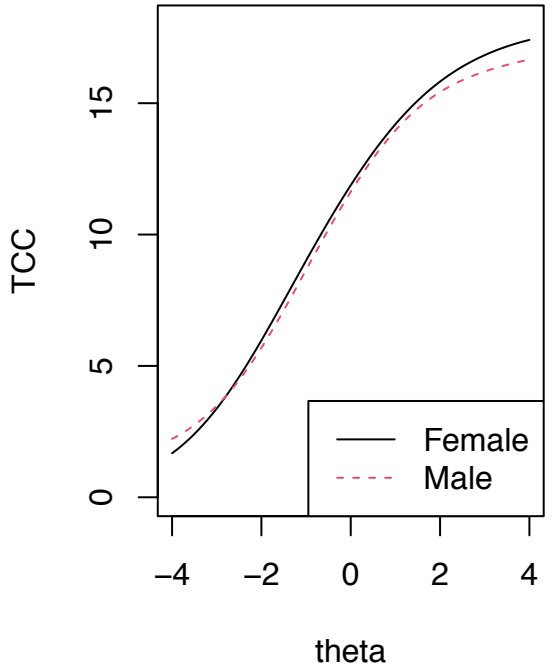

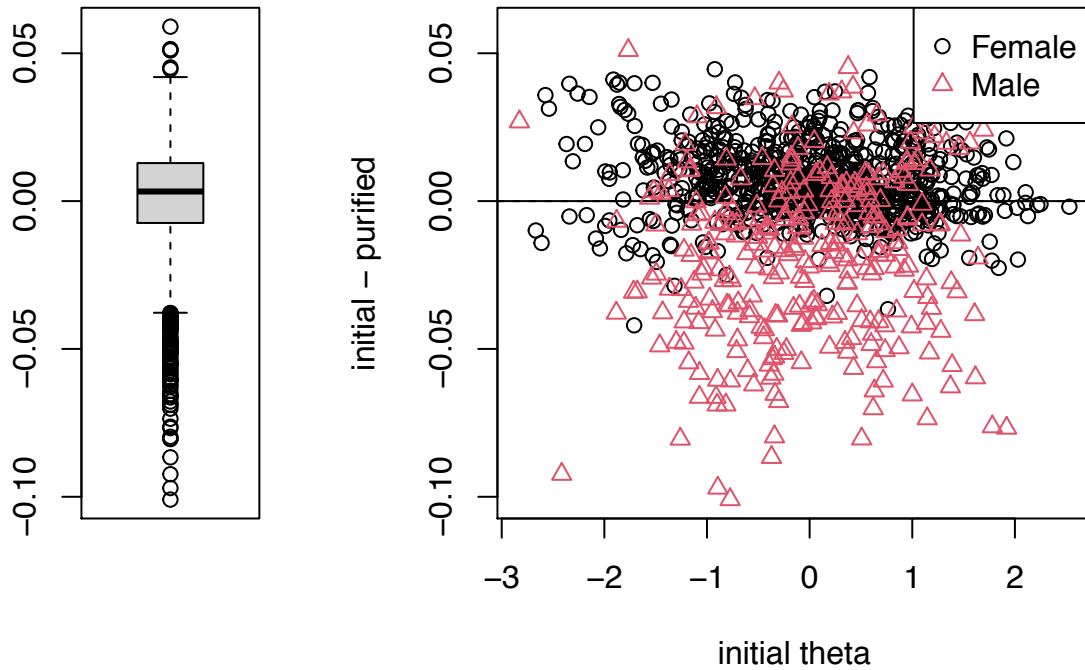

### Sample-based DIF: Resilience

```
## Call:
## lordif::lordif(resp.data = as.data.frame(sample.data), group = clinYN)
##
##   Number of DIF groups: 2
##
##   Number of items flagged for DIF: 7 of 12
##
##   Items flagged: 1, 2, 3, 4, 7, 9, 10
##
##   Number of iterations for purification: 5 of 10
##
##   Detection criterion: Chisqr
##
##   Threshold: alpha = 0.01
##
##   item ncat  chi12  chi13  chi23
## 1      1     7 0.0000 0.0000 0.7361
## 2      2     6 0.0000 0.0000 0.1685
## 3      3     7 0.0000 0.0000 0.0000
## 4      4     7 0.0000 0.0000 0.6677
## 5      5     7 0.0274 0.0838 0.7617
## 6      6     7 0.9819 0.0661 0.0198
## 7      7     7 0.0031 0.0000 0.0000
## 8      8     7 0.0179 0.0607 0.9940
## 9      9     7 0.0000 0.0000 0.5486
## 10    10     7 0.0000 0.0000 0.0735
## 11    11     7 0.0310 0.0835 0.5760
## 12    12     7 0.0652 0.1601 0.6070
```

### Trait Distributions

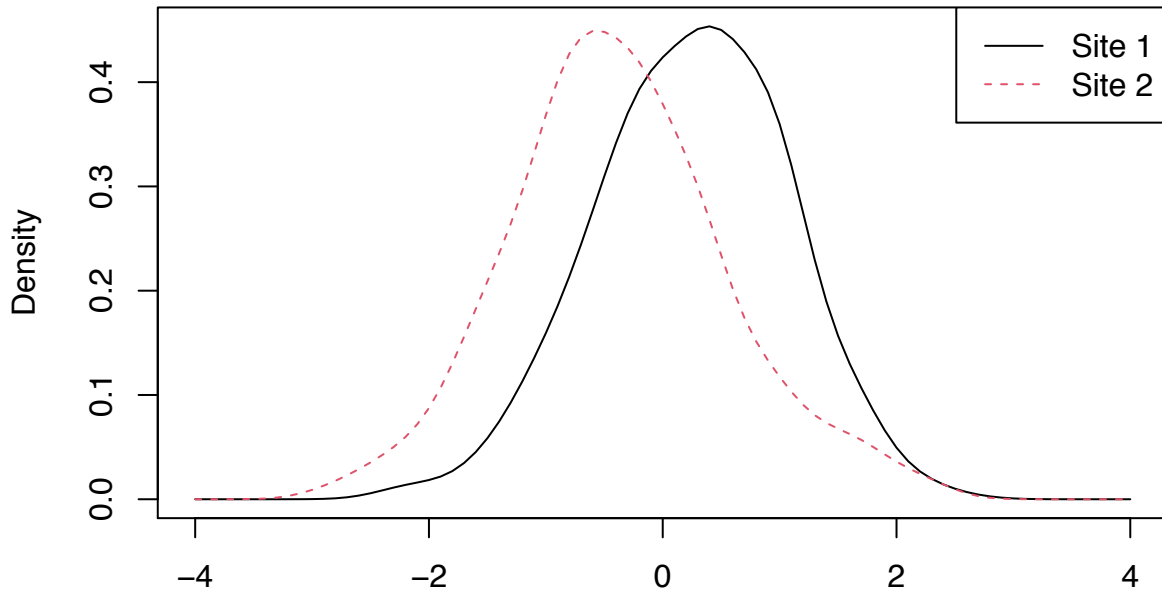

### Item True Score Functions – Item 1 Differences in Item True Score Function

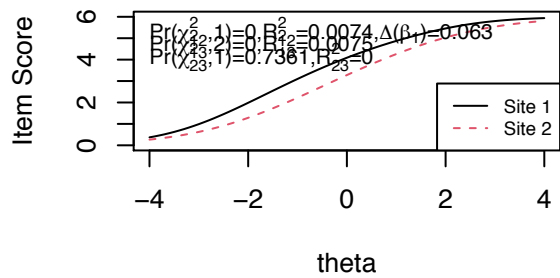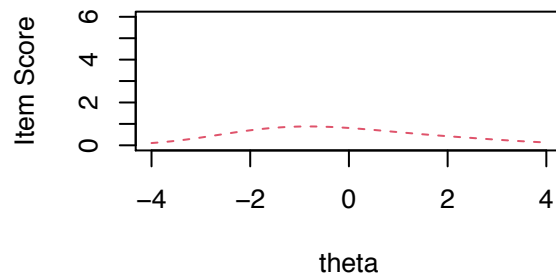

### Item Response Functions

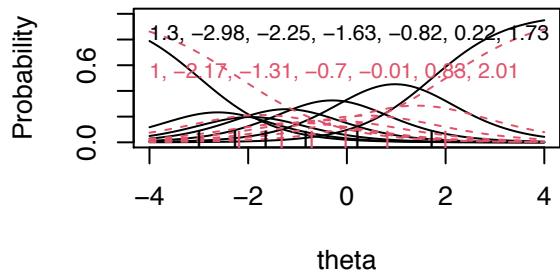

### Impact (Weighted by Density)

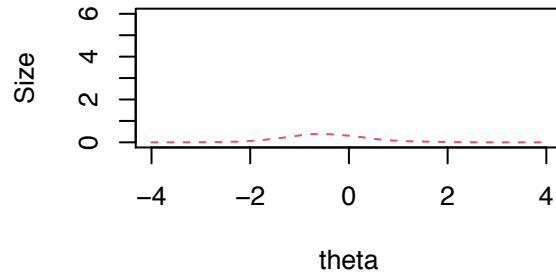

### Item True Score Functions – Item 2

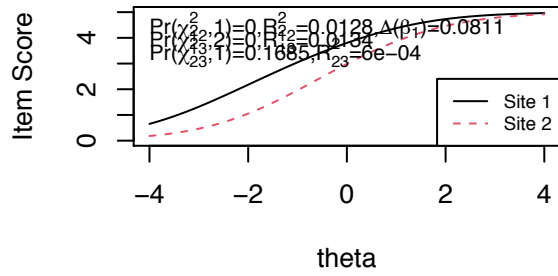

### Differences in Item True Score Function

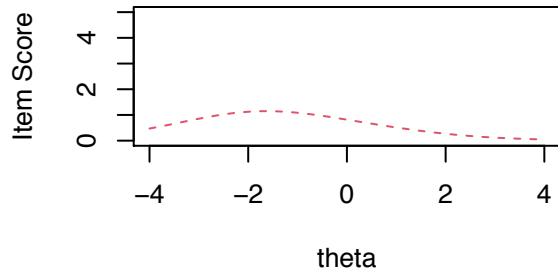

### Item Response Functions

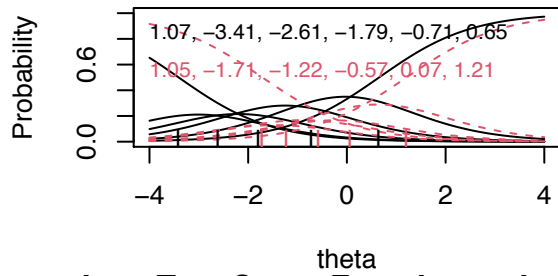

### Impact (Weighted by Density)

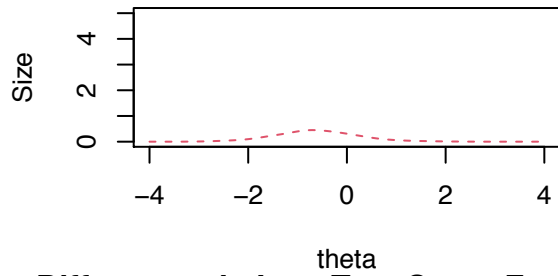

### Item True Score Functions – Item 3

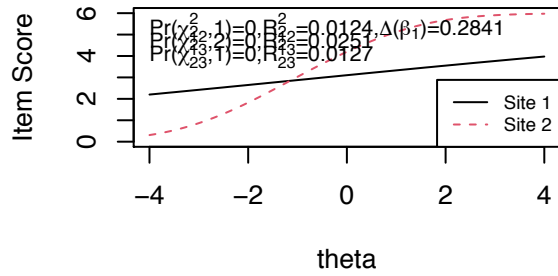

### Differences in Item True Score Function

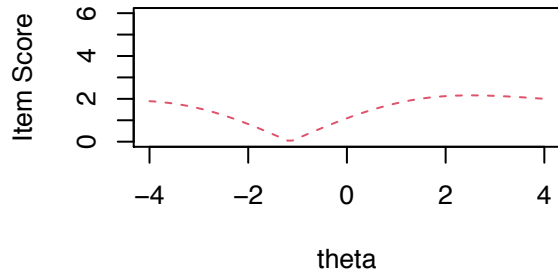

### Item Response Functions

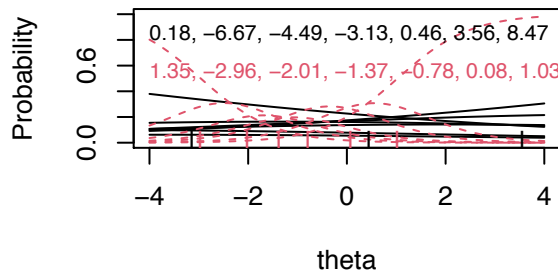

### Impact (Weighted by Density)

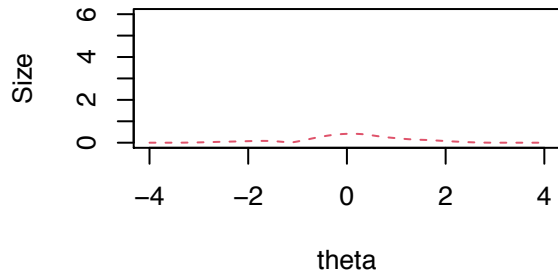

### Item True Score Functions – Item 4

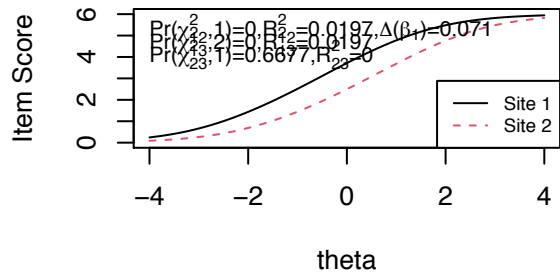

### Differences in Item True Score Function

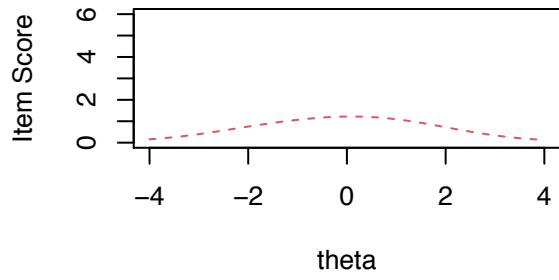

### Item Response Functions

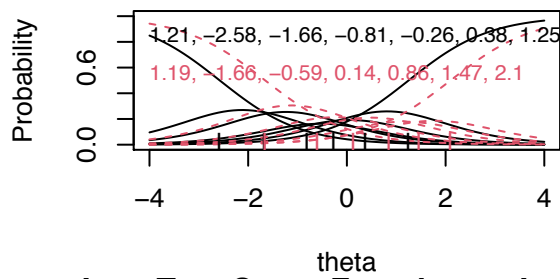

### Impact (Weighted by Density)

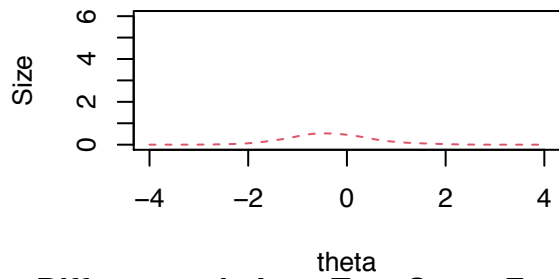

### Item True Score Functions – Item 7

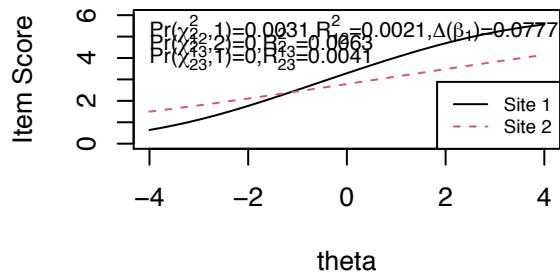

### Differences in Item True Score Function

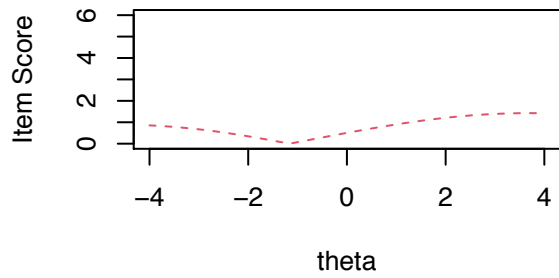

### Item Response Functions

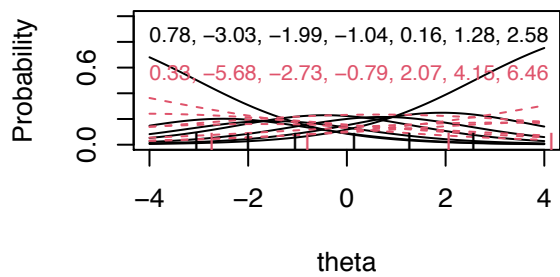

### Impact (Weighted by Density)

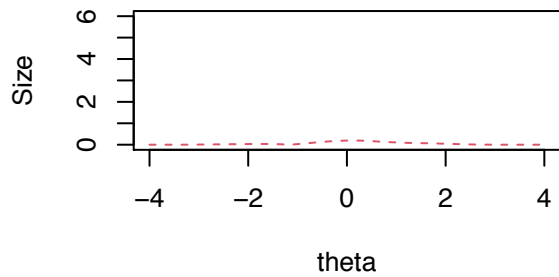



### Item True Score Functions – Item 9

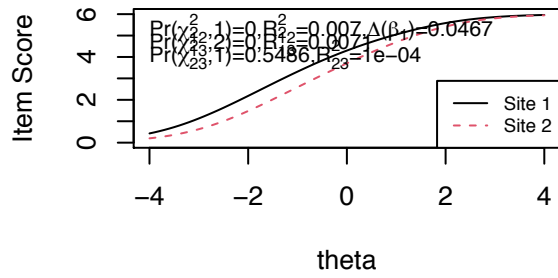

### Differences in Item True Score Function

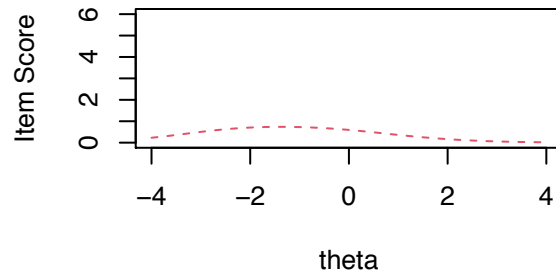

### Item Response Functions

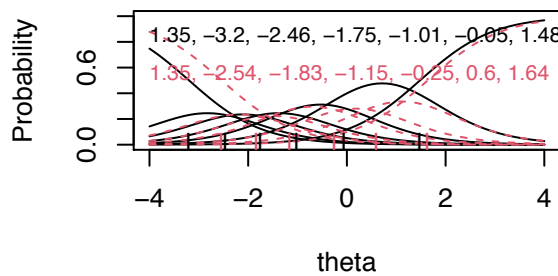

### Impact (Weighted by Density)

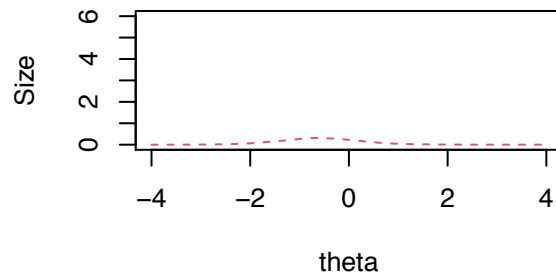

### Item True Score Functions – Item 10

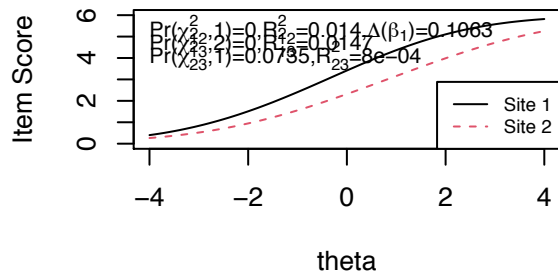

### Differences in Item True Score Function

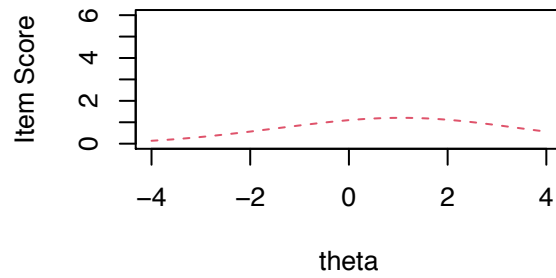

### Item Response Functions

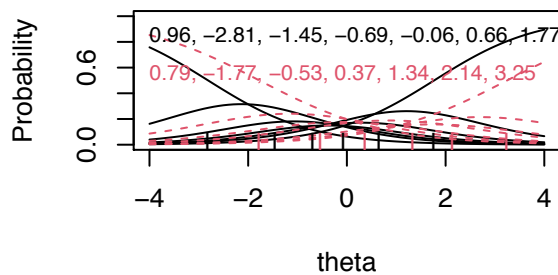

### Impact (Weighted by Density)

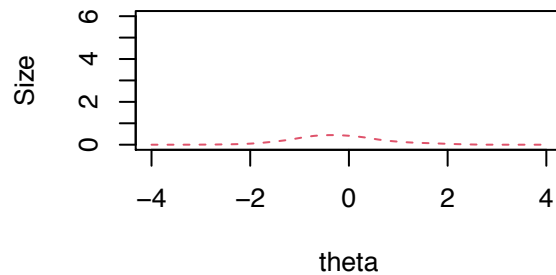

**All Items**

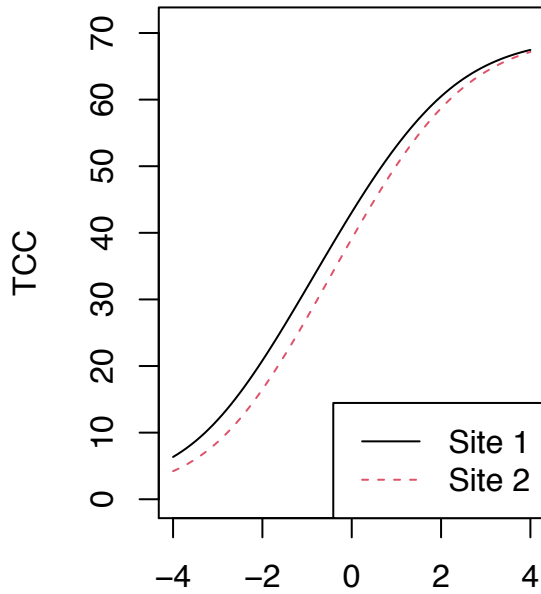

**DIF Items**

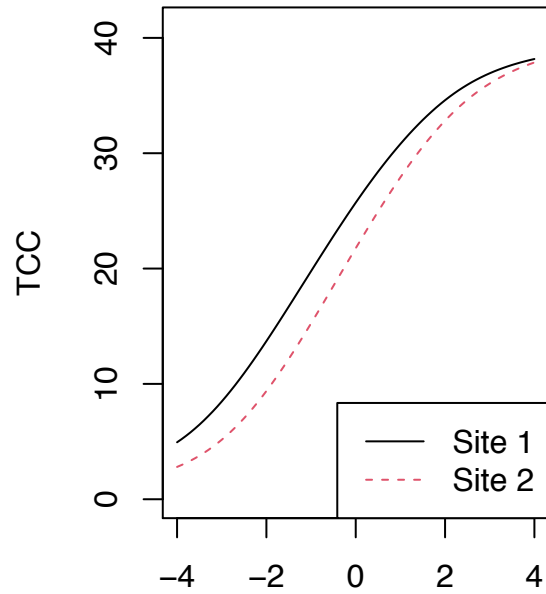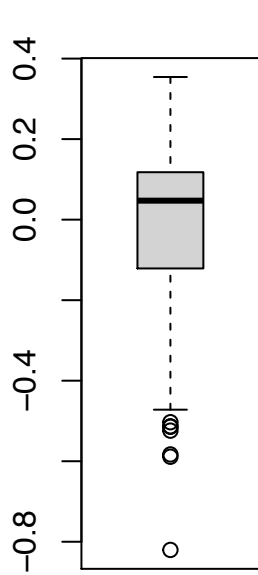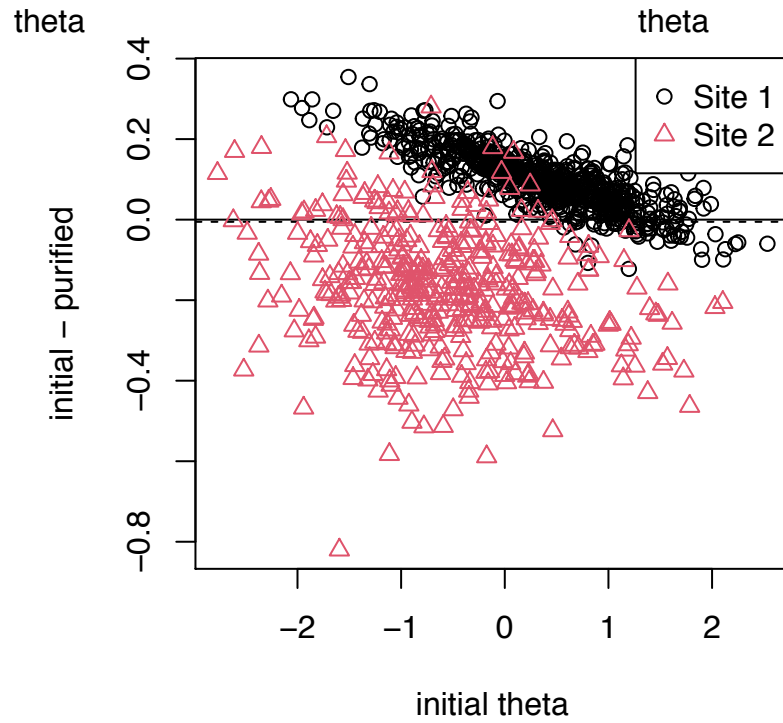

[Back to top](#)

## Hurtful Rumination

Reliability: Hurtful Rumination

## Cronbach's alpha is 0.757.

```

## Mean item-total correlation is 0.385.
## If each item were dropped:
##   raw_alpha std.alpha G6(smc) average_r S/N alpha se var.r med.r
## Q39   0.68   0.68   0.64   0.35 2.1   0.021 0.0095 0.33
## Q3    0.74   0.74   0.69   0.41 2.8   0.017 0.0081 0.43
## Q38   0.70   0.70   0.64   0.37 2.3   0.020 0.0064 0.38
## Q76   0.72   0.72   0.67   0.40 2.6   0.018 0.0042 0.40
## Q85   0.73   0.73   0.68   0.40 2.7   0.018 0.0096 0.42

```

Unidimensionality: Hurtful Rumination

### Scree Plot

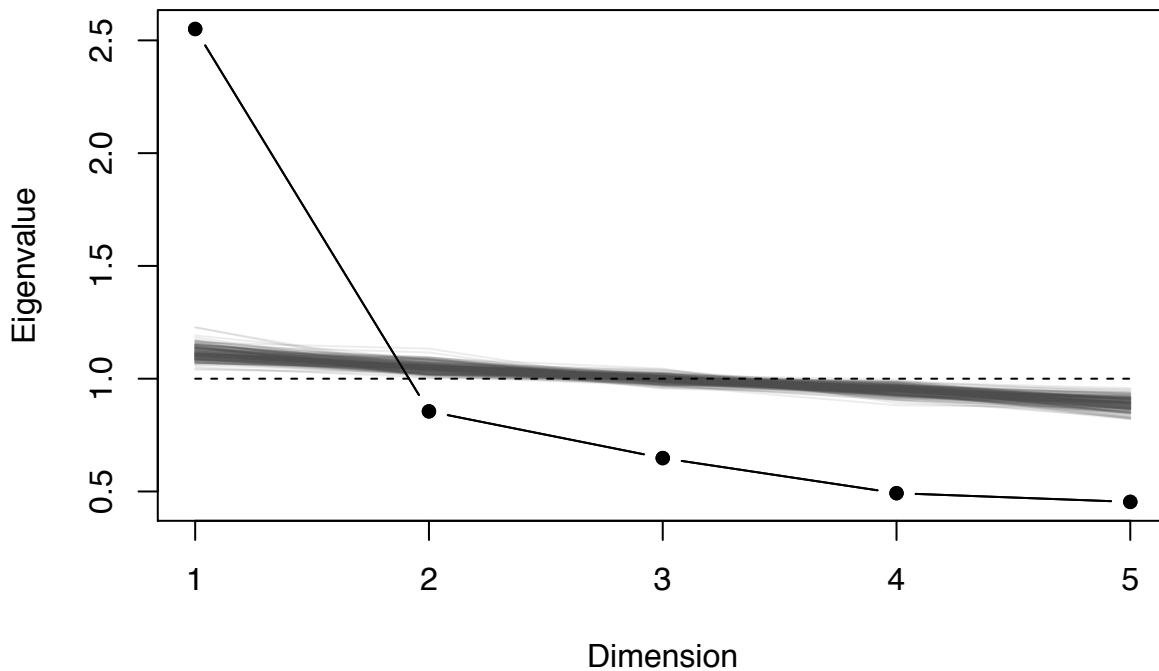

```

## [1] "Ratio of first to second eigenvalues: 2.982"
## [1] 2.5504445 0.8552244 0.6480348 0.4924785 0.4538178
## Factor Analysis using method = minres
## Call: fa(r = grm_obj$X)
## Standardized loadings (pattern matrix) based upon correlation matrix
##   MR1  h2  u2 com
## Q39 0.73 0.54 0.46  1
## Q3  0.53 0.28 0.72  1
## Q38 0.68 0.46 0.54  1
## Q76 0.59 0.35 0.65  1
## Q85 0.57 0.33 0.67  1
##
##           MR1
## SS loadings  1.96
## Proportion Var 0.39
##
## Mean item complexity = 1

```

```

## Test of the hypothesis that 1 factor is sufficient.
##
## The degrees of freedom for the null model are 10 and the objective function was 1.15 with Chi Squ
## The degrees of freedom for the model are 5 and the objective function was 0.09
##
## The root mean square of the residuals (RMSR) is 0.06
## The df corrected root mean square of the residuals is 0.09
##
## The harmonic number of observations is 598 with the empirical chi square 43.99 with prob < 2.3e-
## The total number of observations was 619 with Likelihood Chi Square = 57.54 with prob < 3.9e-11
##
## Tucker Lewis Index of factoring reliability = 0.85
## RMSEA index = 0.13 and the 90 % confidence intervals are 0.101 0.162
## BIC = 25.4
## Fit based upon off diagonal values = 0.98
## Measures of factor score adequacy
##
##                                     MR1
## Correlation of (regression) scores with factors 0.88
## Multiple R square of scores with factors 0.78
## Minimum correlation of possible factor scores 0.55

```

**Graded-Response Model: Hurtful Rumination**

| ##     | Extrmt1 | Extrmt2 | Extrmt3 | Extrmt4 | Extrmt5 | Extrmt6 | Dscrmn |
|--------|---------|---------|---------|---------|---------|---------|--------|
| ## Q39 | -1.885  | -1.123  | -0.740  | -0.302  | 0.158   | 0.686   | 2.004  |
| ## Q3  | -1.547  | -0.766  | -0.218  | 0.303   | 1.015   | 1.745   | 1.149  |
| ## Q38 | -0.918  | -0.286  | 0.106   | 0.481   | 0.947   | 1.562   | 1.921  |
| ## Q76 | -0.445  | 0.029   | 0.446   | 0.994   | 1.543   | 2.160   | 1.661  |
| ## Q85 | -2.602  | -2.139  | -1.578  | -1.182  | -0.670  | 0.050   | 1.474  |

**Test Information Function**

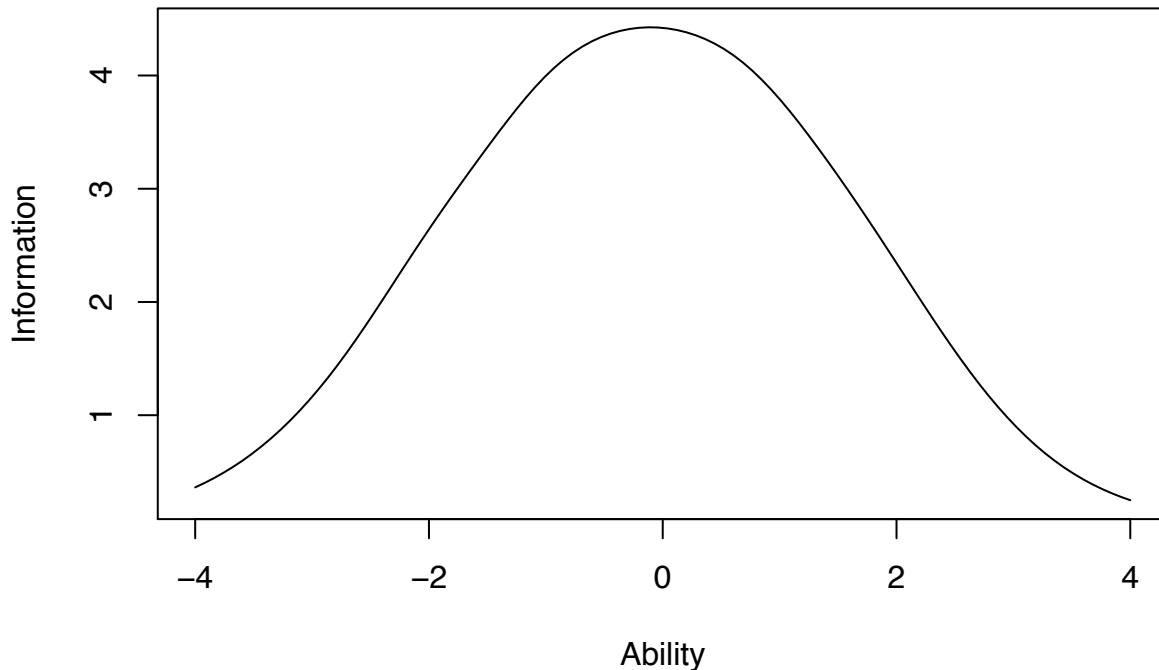

## Item Information Curves

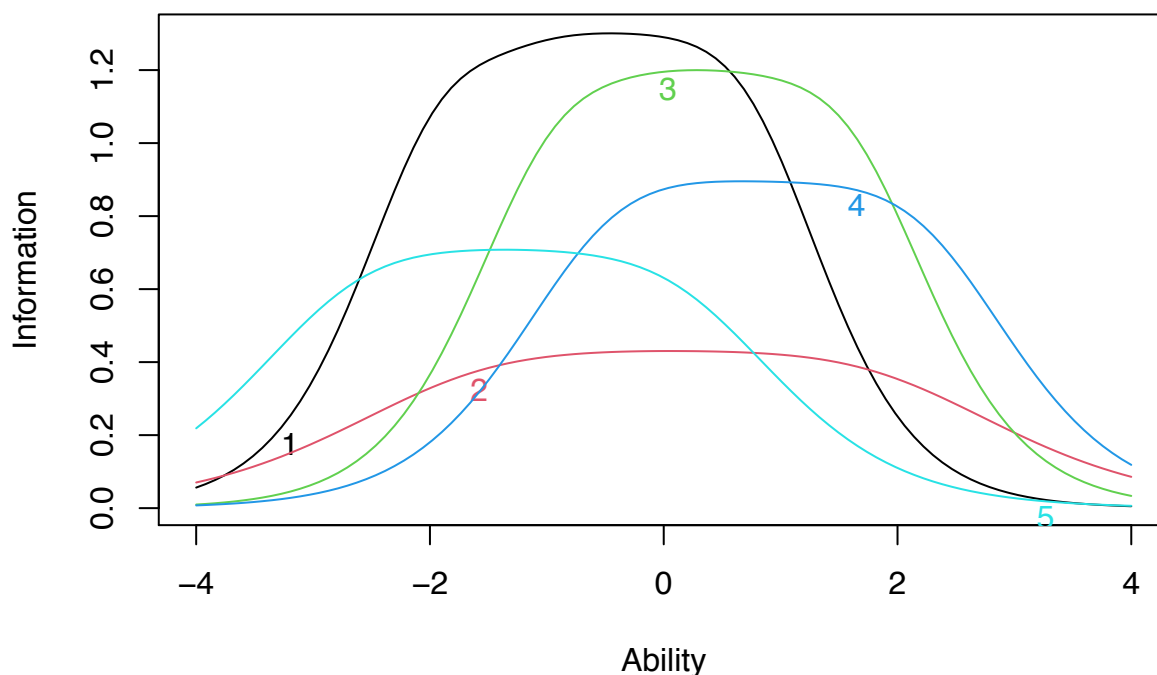

### Gender-based DIF: Hurtful Rumination

```
## Call:
## lordif::lordif(resp.data = as.data.frame(sex.data), group = sex)
##
## Number of DIF groups: 2
##
## Number of items flagged for DIF: 2 of 5
##
## Items flagged: 2, 5
##
## Number of iterations for purification: 3 of 10
##
## Detection criterion: Chisqr
##
## Threshold: alpha = 0.01
##
## item ncat chi12 chi13 chi23
## 1 1 7 0.6519 0.6004 0.3662
## 2 2 7 0.0000 0.0000 0.7387
## 3 3 7 0.2967 0.1945 0.1393
## 4 4 7 0.6118 0.4465 0.2444
## 5 5 7 0.0003 0.0010 0.3226
```

## Trait Distributions

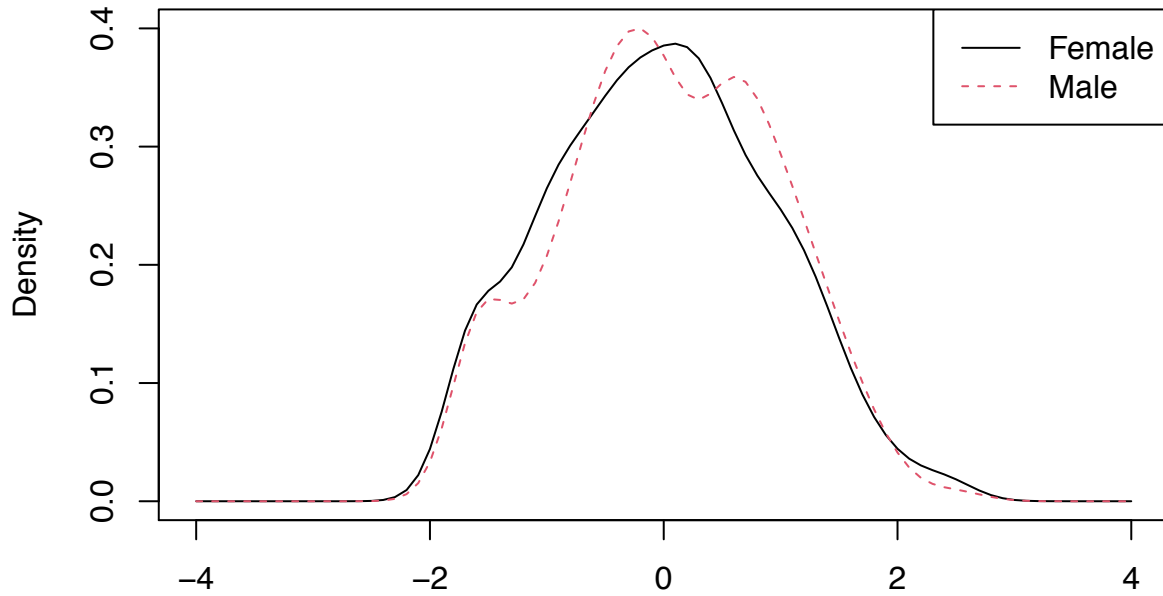

### Item True Score Functions – Item 2 Differences in Item True Score Function

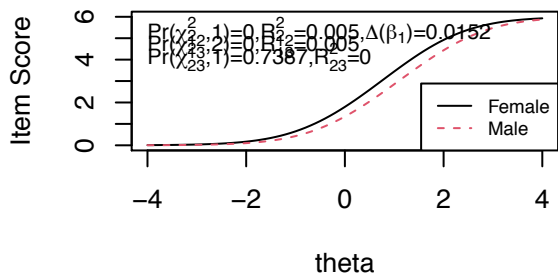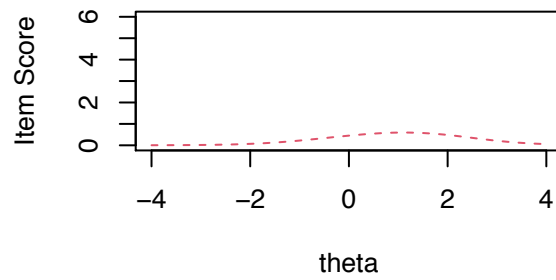

### Item Response Functions

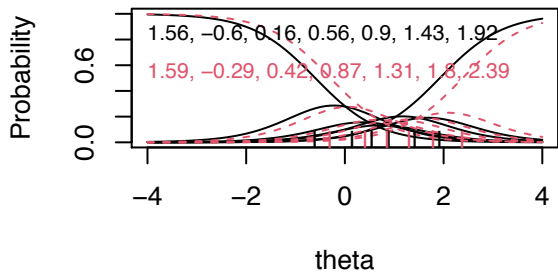

### Impact (Weighted by Density)

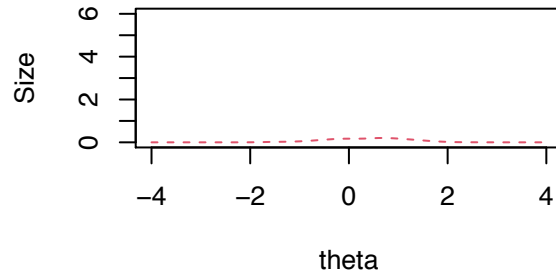

### Item True Score Functions – Item 5

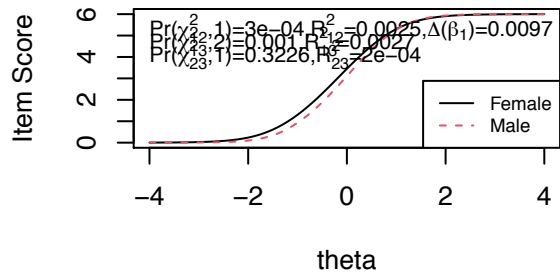

### Differences in Item True Score Function

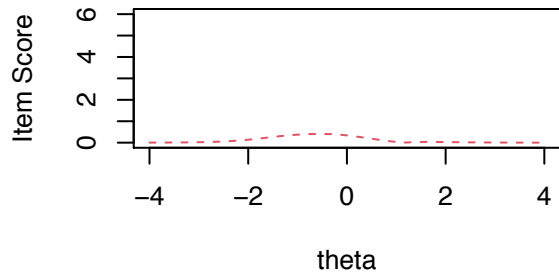

### Item Response Functions

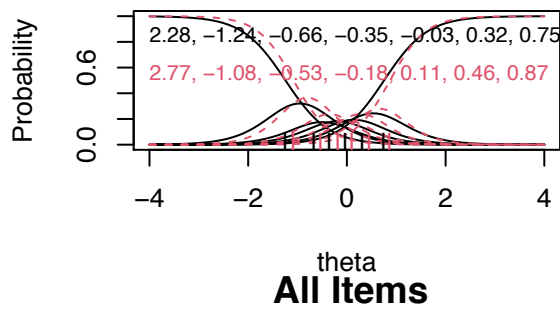

### Impact (Weighted by Density)

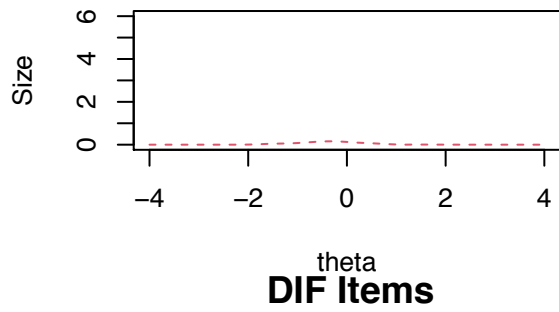

**All Items**

**DIF Items**

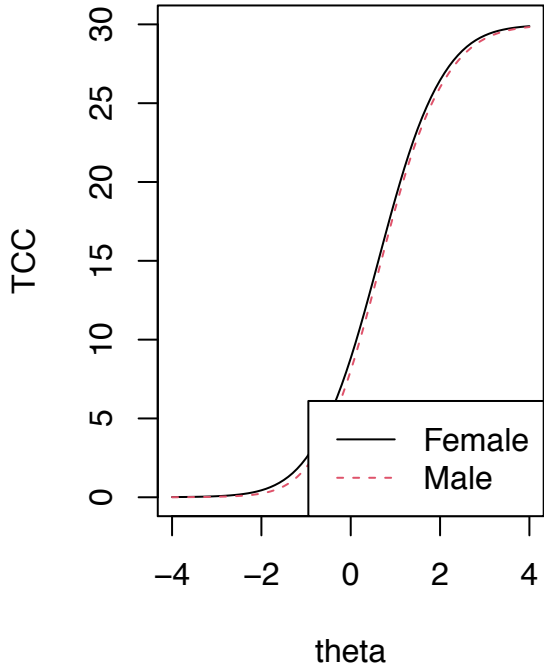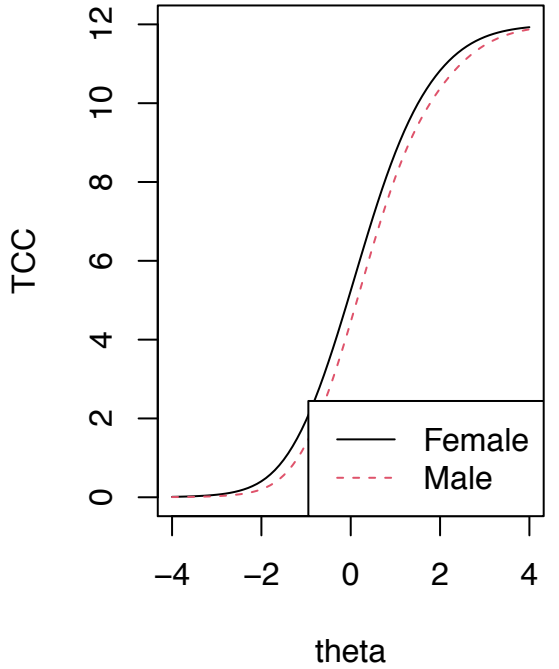

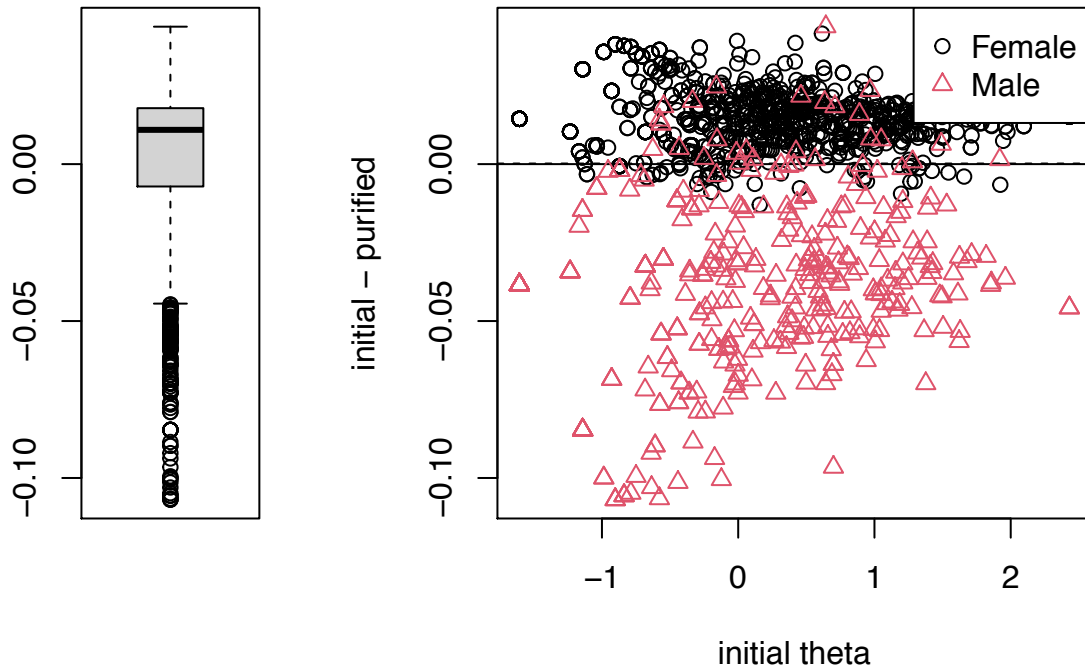

### Sample-based DIF: Hurtful Rumination

```
## Call:
## lordif::lordif(resp.data = as.data.frame(sample.data), group = clinYN)
##
## Number of DIF groups: 2
##
## Number of items flagged for DIF: 1 of 5
##
## Items flagged: 3
##
## Number of iterations for purification: 2 of 10
##
## Detection criterion: Chisqr
##
## Threshold: alpha = 0.01
##
## item ncat chi12 chi13 chi23
## 1 1 7 0.4392 0.6920 0.7104
## 2 2 7 0.4665 0.1786 0.0877
## 3 3 7 0.0000 0.0000 0.6195
## 4 4 7 0.3878 0.6171 0.6394
## 5 5 7 0.3260 0.1098 0.0631
```



### Trait Distributions

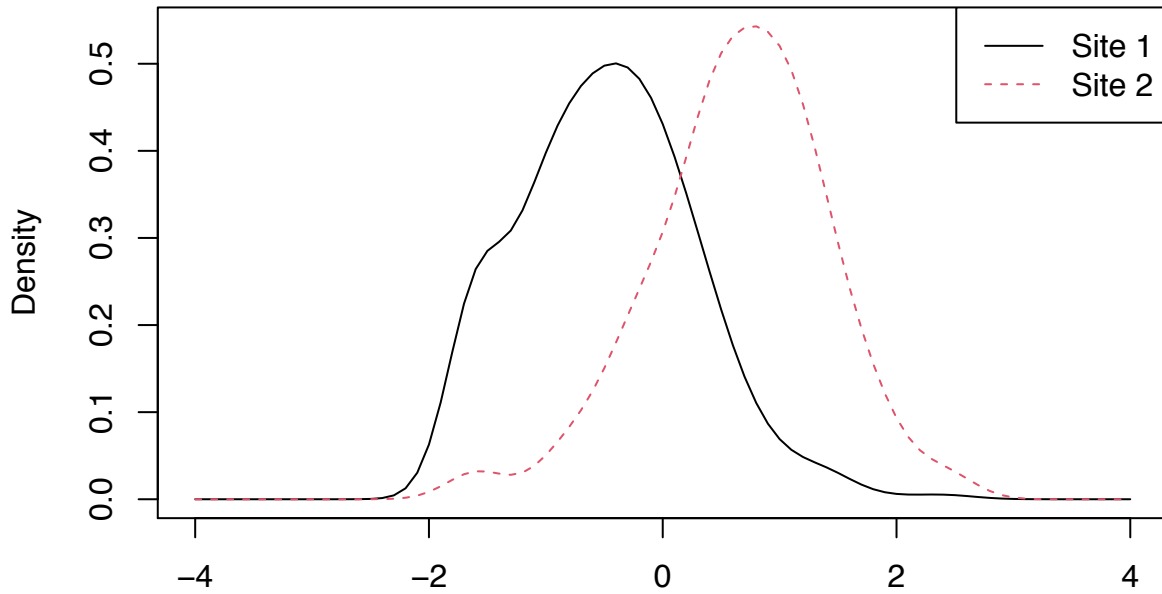

### Item True Score Functions – Item 3

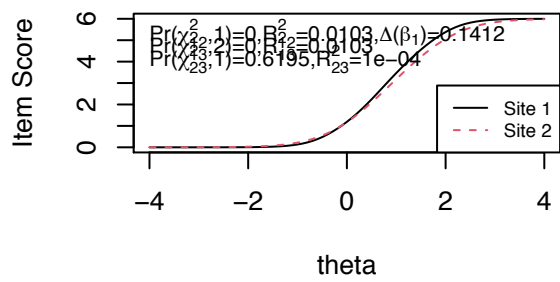

### Differences in Item True Score Function

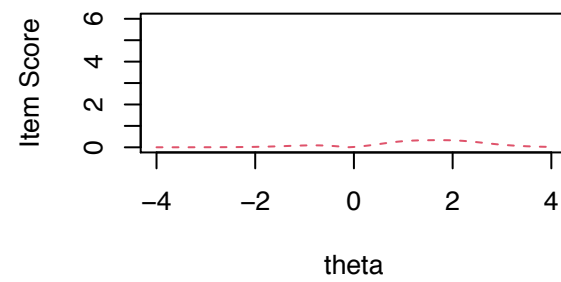

### Item Response Functions

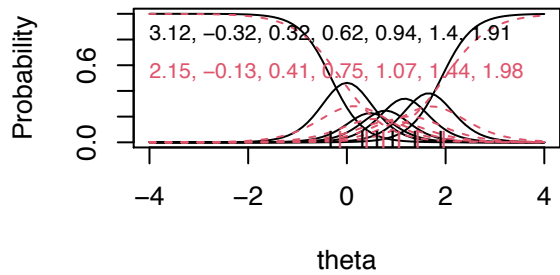

### Impact (Weighted by Density)

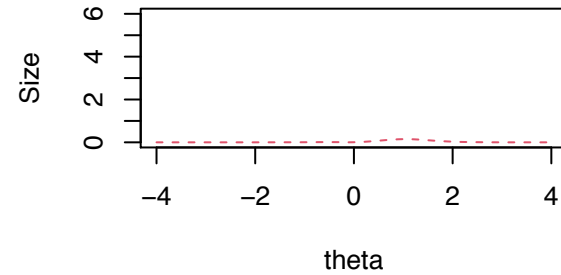

**All Items**

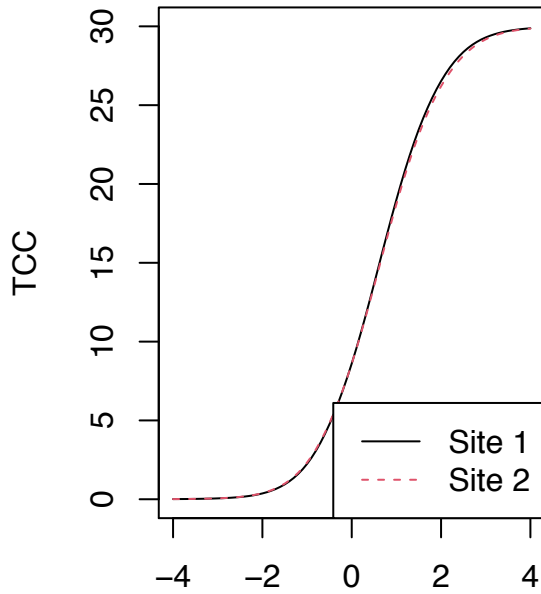

**DIF Items**

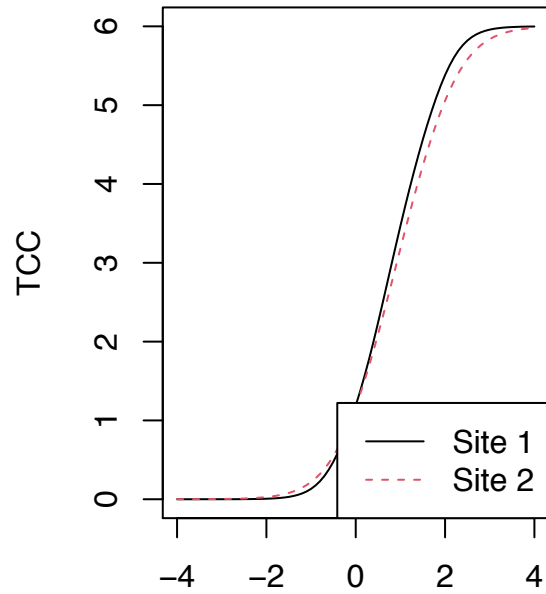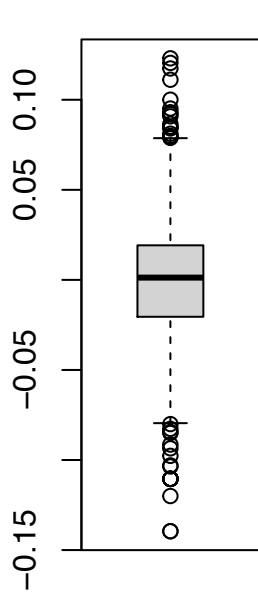

theta

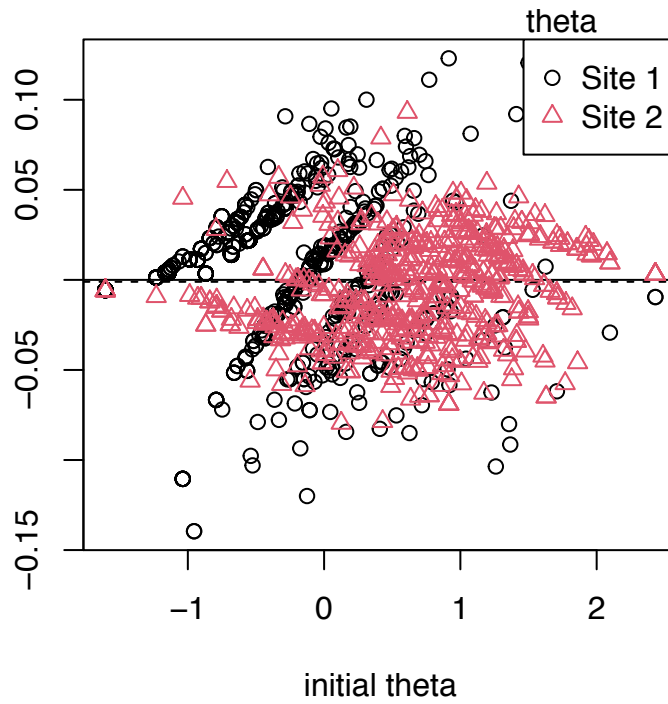

theta

[Back to top](#)

## Social Role Functioning

### Reliability: Social Role Functioning

## Cronbach's alpha is 0.676.  
## Mean item-total correlation is 0.346.

```
## If each item were dropped:
##      raw_alpha std.alpha G6(smc) average_r S/N alpha se  var.r med.r
## Q87-   0.55     0.55   0.45     0.29 1.2   0.032 0.00078 0.27
## Q5     0.51     0.51   0.41     0.26 1.0   0.034 0.00066 0.27
## Q22    0.66     0.67   0.65     0.40 2.0   0.024 0.07214 0.27
## Q27-   0.70     0.70   0.67     0.43 2.3   0.021 0.05867 0.32
```

Unidimensionality: Social Role Functioning

### Scree Plot

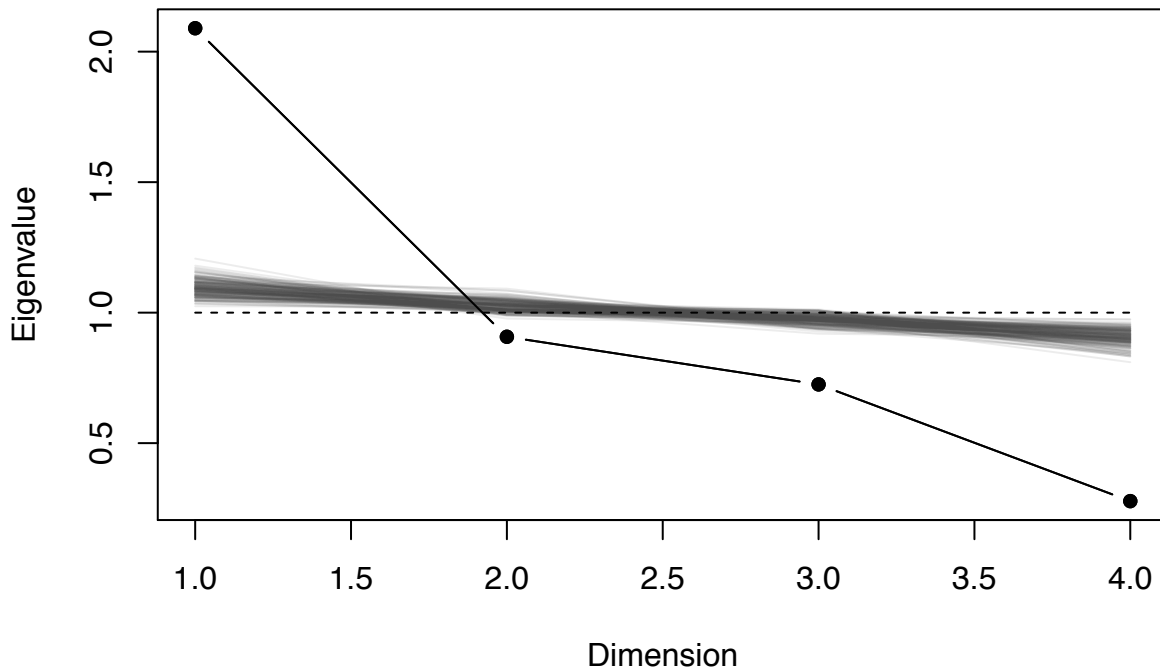

```
## [1] "Ratio of first to second eigenvalues: 2.303"
```

```
## [1] 2.0896950 0.9074757 0.7249887 0.2778405
```

```
## Factor Analysis using method = minres
```

```
## Call: fa(r = grm_obj$X)
```

```
## Standardized loadings (pattern matrix) based upon correlation matrix
```

```
##      MR1  h2  u2 com
```

```
## Q87 -0.77 0.59 0.41  1
```

```
## Q5  0.90 0.81 0.19  1
```

```
## Q22 0.39 0.15 0.85  1
```

```
## Q27 -0.34 0.12 0.88  1
```

```
##
```

```
##      MR1
```

```
## SS loadings  1.67
```

```
## Proportion Var 0.42
```

```
##
```

```
## Mean item complexity = 1
```

```
## Test of the hypothesis that 1 factor is sufficient.
```

```
##
```

```
## The degrees of freedom for the null model are 6 and the objective function was 0.96 with Chi Squa
```

```

## The degrees of freedom for the model are 2 and the objective function was 0.04
##
## The root mean square of the residuals (RMSR) is 0.06
## The df corrected root mean square of the residuals is 0.11
##
## The harmonic number of observations is 540 with the empirical chi square 23.88 with prob < 6.5e-
## The total number of observations was 619 with Likelihood Chi Square = 23.98 with prob < 6.2e-06
##
## Tucker Lewis Index of factoring reliability = 0.887
## RMSEA index = 0.133 and the 90 % confidence intervals are 0.089 0.184
## BIC = 11.12
## Fit based upon off diagonal values = 0.98
## Measures of factor score adequacy
##
##                                     MR1
## Correlation of (regression) scores with factors 0.92
## Multiple R square of scores with factors 0.85
## Minimum correlation of possible factor scores 0.71

```

### Graded-Response Model: Social Role Functioning

| ##     | Extrmt1 | Extrmt2 | Extrmt3 | Extrmt4 | Extrmt5 | Extrmt6 | Dscrmn |
|--------|---------|---------|---------|---------|---------|---------|--------|
| ## Q87 | 1.033   | 0.562   | 0.147   | -0.403  | -0.823  | -1.403  | -2.866 |
| ## Q5  | -1.565  | -1.001  | -0.605  | -0.038  | 0.382   | 0.821   | 4.237  |
| ## Q22 | -1.504  | -0.242  | 0.788   | 1.745   | 2.438   | 3.341   | 0.787  |
| ## Q27 | 3.330   | 1.845   | 0.790   | -0.212  | -1.047  | -2.401  | -0.629 |

### Test Information Function

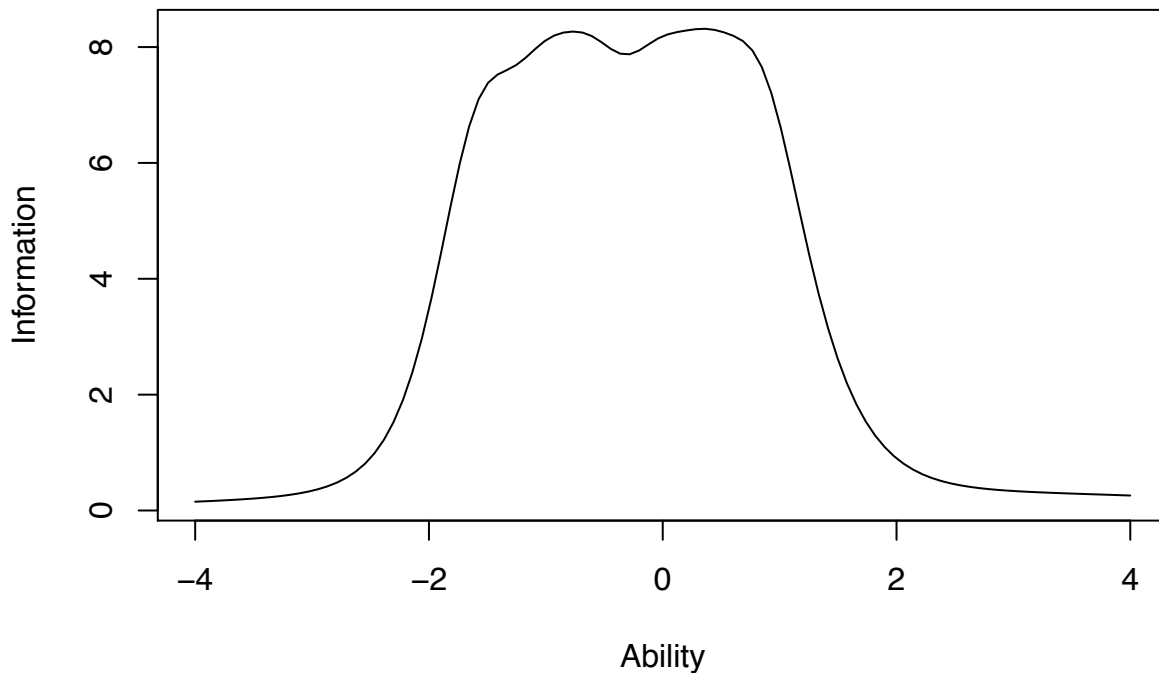

## Item Information Curves

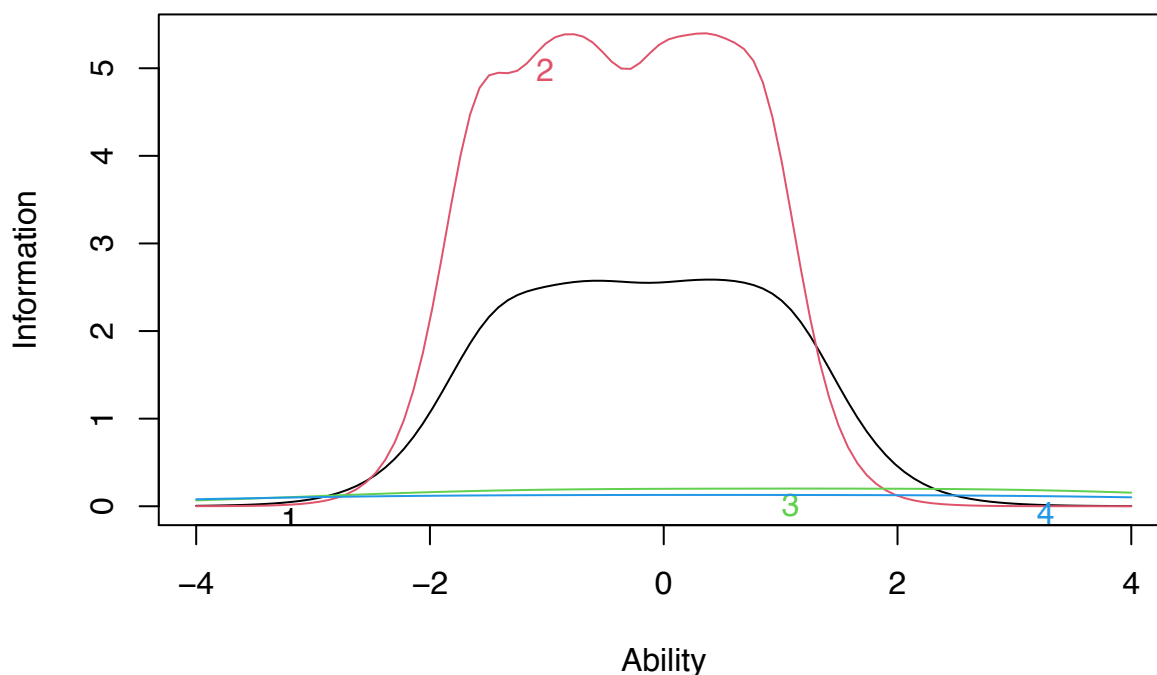

### Gender-based DIF: Social Role Functioning

```
## Call:
## lordif::lordif(resp.data = as.data.frame(sex.data), group = sex)
##
##   Number of DIF groups: 2
##
##   Number of items flagged for DIF: 0 of 4
##
##   Items flagged:
##
##   Number of iterations for purification: 1 of 10
##
##   Detection criterion: Chisqr
##
##   Threshold: alpha = 0.01
```

### Sample-based DIF: Social Role Functioning

```
## Call:
## lordif::lordif(resp.data = as.data.frame(sample.data), group = clinYN)
##
##   Number of DIF groups: 2
##
##   Number of items flagged for DIF: 4 of 4
##
##   Items flagged: 1, 2, 3, 4
##
```

```

## Number of iterations for purification: 1 of 10
##
## Detection criterion: Chisqr
##
## Threshold: alpha = 0.01
##
## item ncat chi12 chi13 chi23
## 1 1 7 0 0e+00 0.5205
## 2 2 7 0 1e-04 0.3929
## 3 3 7 0 0e+00 0.2994
## 4 4 7 0 2e-04 0.7270

```

Back to top

## Somatic Anxiety

### Reliability: Somatic Anxiety

```

## Cronbach's alpha is 0.76.
## Mean item-total correlation is 0.348.
## If each item were dropped:
## raw_alpha std.alpha G6(smc) average_r S/N alpha se var.r med.r
## Q3 0.72 0.72 0.70 0.34 2.6 0.018 0.0186 0.30
## Q30 0.75 0.75 0.73 0.37 3.0 0.016 0.0179 0.40
## Q47 0.77 0.77 0.74 0.40 3.3 0.015 0.0121 0.40
## Q51 0.71 0.72 0.68 0.33 2.5 0.018 0.0080 0.30
## Q53 0.70 0.70 0.68 0.32 2.4 0.019 0.0146 0.29
## Q75 0.70 0.70 0.66 0.32 2.3 0.019 0.0076 0.29

```

Unidimensionality: Somatic Anxiety

### Scree Plot

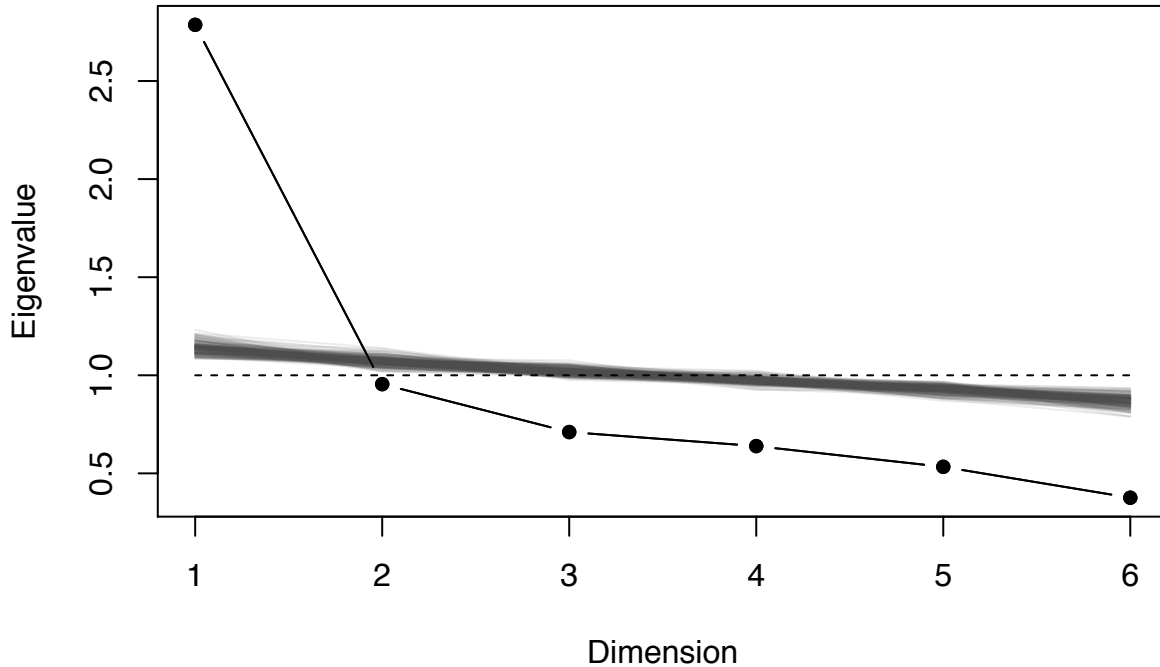

```
## [1] "Ratio of first to second eigenvalues: 2.918"  
## [1] 2.7863327 0.9548338 0.7105823 0.6390692 0.5333155 0.3758666  
## Factor Analysis using method = minres  
## Call: fa(r = grm_obj$X)  
## Standardized loadings (pattern matrix) based upon correlation matrix  
##      MR1  h2  u2 com  
## Q3  0.60 0.36 0.64  1  
## Q30 0.46 0.21 0.79  1  
## Q47 0.38 0.14 0.86  1  
## Q51 0.67 0.45 0.55  1  
## Q53 0.70 0.49 0.51  1  
## Q75 0.74 0.55 0.45  1  
##  
##              MR1  
## SS loadings  2.21  
## Proportion Var 0.37  
##  
## Mean item complexity = 1  
## Test of the hypothesis that 1 factor is sufficient.  
##  
## The degrees of freedom for the null model are 15 and the objective function was 1.42 with Chi Squ  
## The degrees of freedom for the model are 9 and the objective function was 0.11  
##  
## The root mean square of the residuals (RMSR) is 0.06  
## The df corrected root mean square of the residuals is 0.07  
##
```

```

## The harmonic number of observations is 602 with the empirical chi square 55.62 with prob < 9.3e-
## The total number of observations was 619 with Likelihood Chi Square = 67.87 with prob < 4e-11
##
## Tucker Lewis Index of factoring reliability = 0.885
## RMSEA index = 0.103 and the 90 % confidence intervals are 0.081 0.126
## BIC = 10.01
## Fit based upon off diagonal values = 0.98
## Measures of factor score adequacy
##
## Correlation of (regression) scores with factors MR1 0.89
## Multiple R square of scores with factors 0.80
## Minimum correlation of possible factor scores 0.60

```

**Graded-Response Model: Somatic Anxiety**

| ##     | Extrmt1 | Extrmt2 | Extrmt3 | Extrmt4 | Extrmt5 | Extrmt6 | Dscrmn |
|--------|---------|---------|---------|---------|---------|---------|--------|
| ## Q3  | -1.333  | -0.639  | -0.158  | 0.296   | 0.909   | 1.541   | 1.406  |
| ## Q30 | -1.129  | -0.305  | 0.396   | 1.088   | 1.923   | 2.635   | 0.944  |
| ## Q47 | -0.803  | 0.125   | 0.582   | 1.286   | 1.921   | 2.831   | 0.708  |
| ## Q51 | -1.813  | -1.288  | -0.816  | -0.330  | 0.250   | 0.852   | 1.950  |
| ## Q53 | -0.769  | -0.260  | 0.125   | 0.487   | 0.916   | 1.489   | 1.912  |
| ## Q75 | -1.144  | -0.680  | -0.313  | 0.089   | 0.576   | 1.035   | 2.380  |

**Test Information Function**

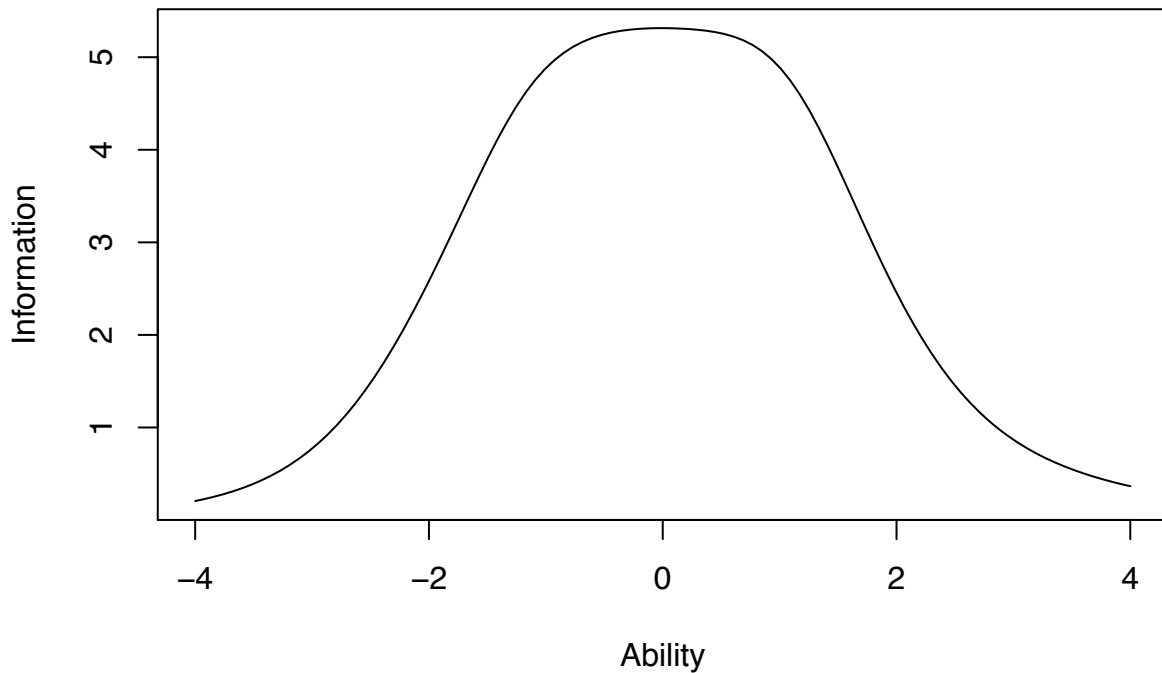



## Item Information Curves

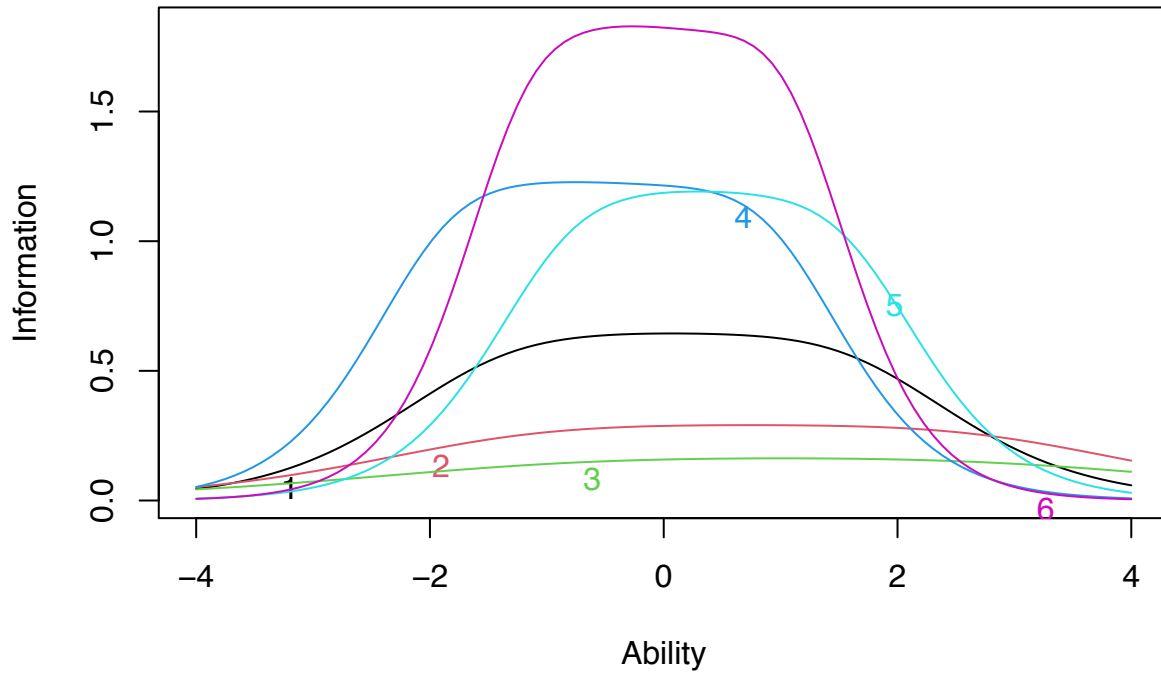

### Gender-based DIF: Somatic Anxiety

```
## Call:
## lordif::lordif(resp.data = as.data.frame(sex.data), group = sex)
##
## Number of DIF groups: 2
##
## Number of items flagged for DIF: 2 of 6
##
## Items flagged: 1, 4
##
## Number of iterations for purification: 2 of 10
##
## Detection criterion: Chisqr
##
## Threshold: alpha = 0.01
##
## item ncat chi12 chi13 chi23
## 1 1 7 0.0000 0.0000 0.2851
## 2 2 7 0.2923 0.5435 0.7397
## 3 3 7 0.0357 0.0539 0.2319
## 4 4 7 0.0000 0.0000 0.0183
## 5 5 7 0.8853 0.5568 0.2835
## 6 6 7 0.6848 0.7125 0.4738
```

## Trait Distributions

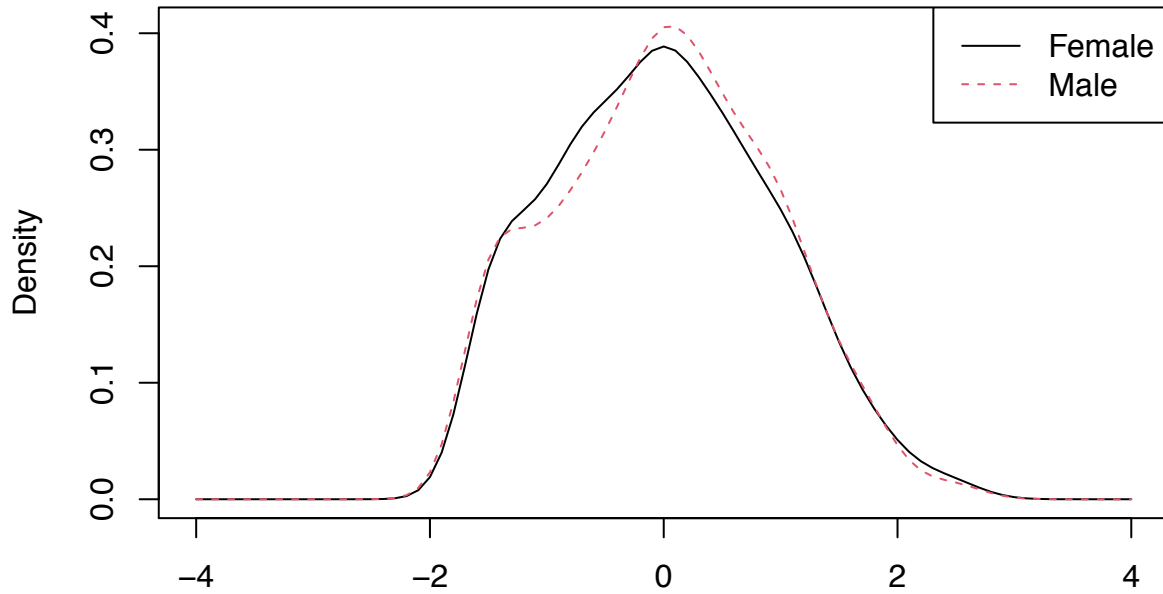

### Item True Score Functions – Item 1 Differences in Item True Score Function

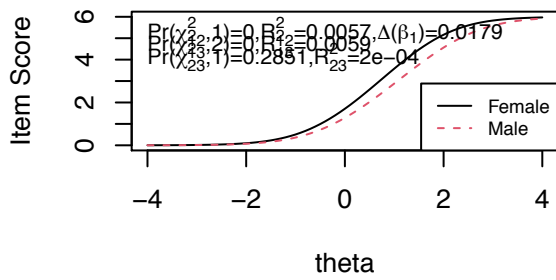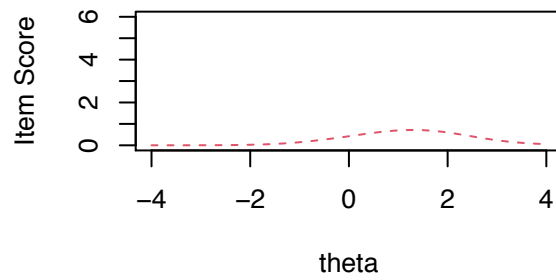

### Item Response Functions

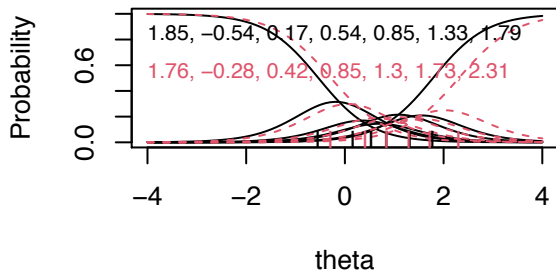

### Impact (Weighted by Density)

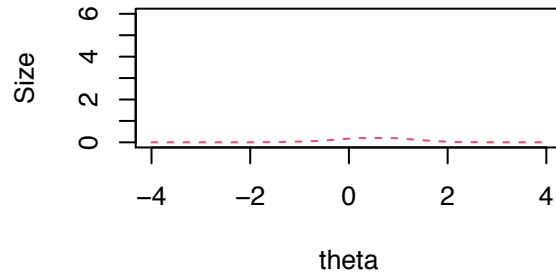

**Item True Score Functions – Item 4**

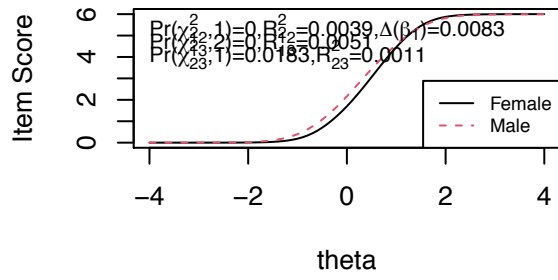

**Differences in Item True Score Function**

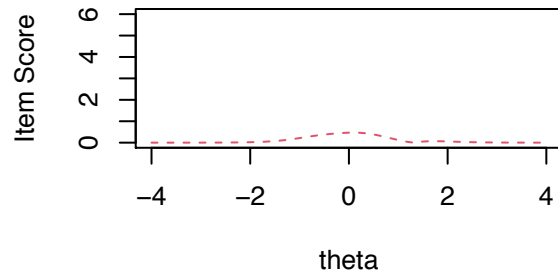

**Item Response Functions**

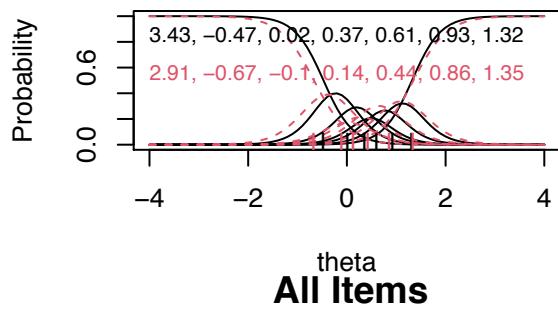

**Impact (Weighted by Density)**

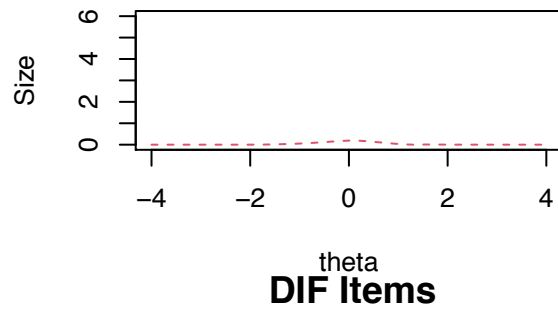

**All Items**

**DIF Items**

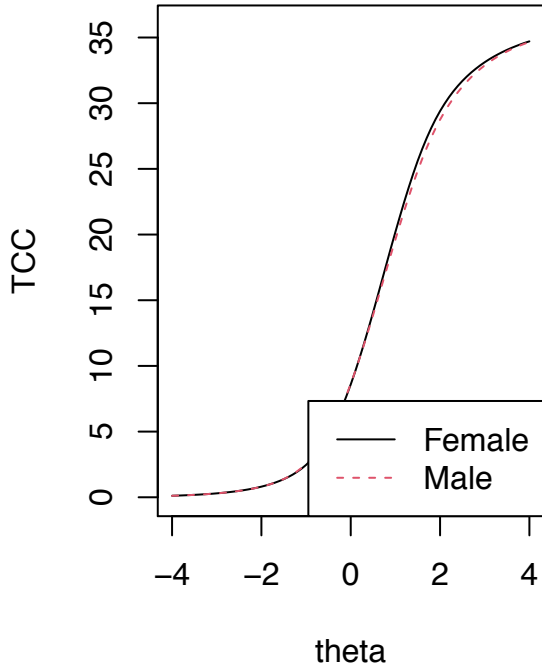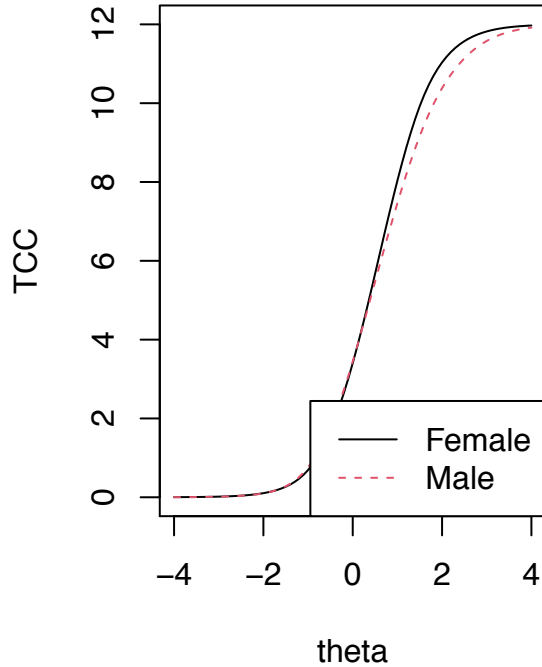

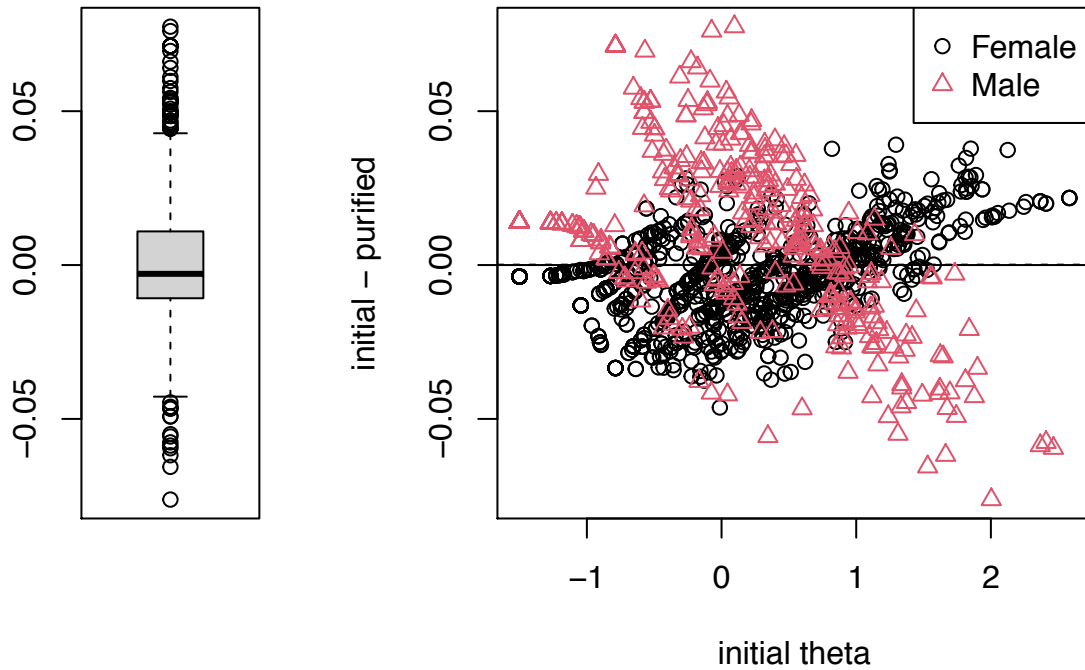

#### Sample-based DIF: Somatic Anxiety

```
## Call:
## lordif::lordif(resp.data = as.data.frame(sample.data), group = clinYN)
##
## Number of DIF groups: 2
##
## Number of items flagged for DIF: 6 of 6
##
## Items flagged: 1, 2, 3, 4, 5, 6
##
## Number of iterations for purification: 4 of 10
##
## Detection criterion: Chisqr
##
## Threshold: alpha = 0.01
##
## item ncat chi12 chi13 chi23
## 1 1 7 0 0 0.5280
## 2 2 7 0 0 0.4738
## 3 3 7 0 0 0.6598
## 4 4 7 0 0 0.0021
## 5 5 7 0 0 0.0000
## 6 6 7 0 0 0.6639
```

Back to top

## Substance Use

### Reliability: Substance Use

```
## Cronbach's alpha is 0.918.
## Mean item-total correlation is 0.742.
## If each item were dropped:
##   raw_alpha std.alpha G6(smc) average_r S/N alpha se   var.r med.r
## Q35   0.89   0.89   0.85   0.74 8.4   0.0073 2.7e-03 0.76
## Q4    0.90   0.90   0.86   0.75 9.1   0.0069 6.7e-04 0.76
## Q16   0.90   0.91   0.86   0.76 9.5   0.0067 2.8e-06 0.76
## Q59   0.88   0.89   0.84   0.72 7.7   0.0081 1.8e-03 0.72
```

### Unidimensionality: Substance Use

#### Scree Plot

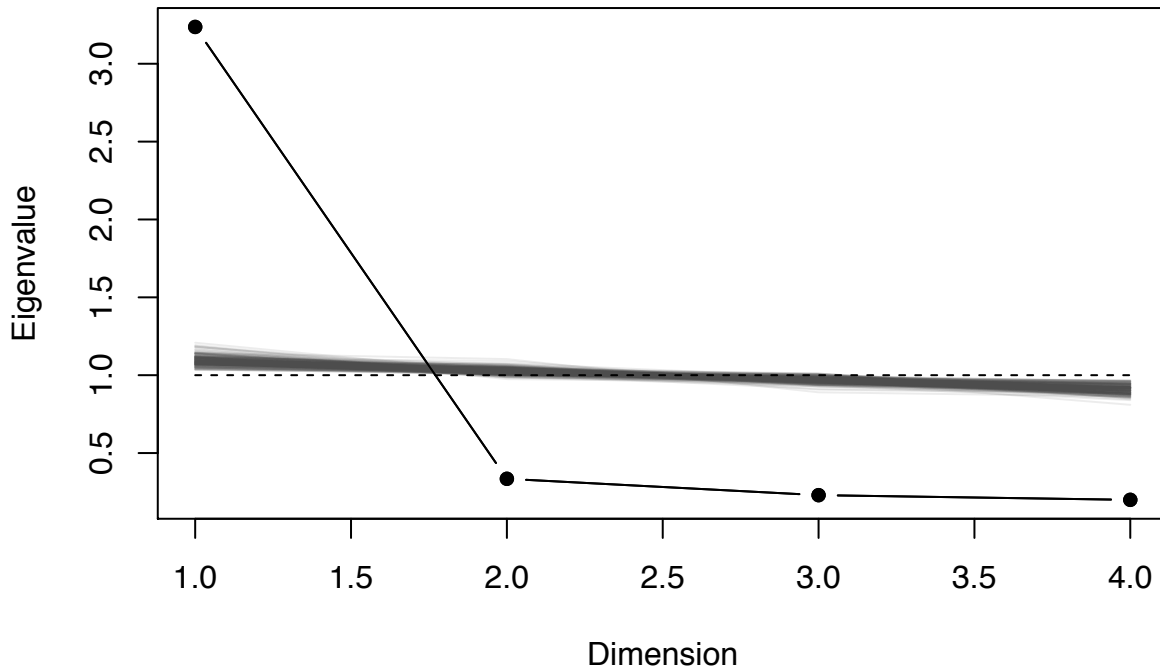

```
## [1] "Ratio of first to second eigenvalues: 9.675"
## [1] 3.2363277 0.3345069 0.2296355 0.1995300
## Factor Analysis using method = minres
## Call: fa(r = grm_obj$X)
## Standardized loadings (pattern matrix) based upon correlation matrix
##   MR1  h2  u2 com
## Q35 0.88 0.77 0.23  1
## Q4  0.85 0.72 0.28  1
## Q16 0.83 0.69 0.31  1
## Q59 0.90 0.80 0.20  1
##
##           MR1
## SS loadings 2.98
```

```

## Proportion Var 0.75
##
## Mean item complexity = 1
## Test of the hypothesis that 1 factor is sufficient.
##
## The degrees of freedom for the null model are 6 and the objective function was 3 with Chi Square
## The degrees of freedom for the model are 2 and the objective function was 0.05
##
## The root mean square of the residuals (RMSR) is 0.02
## The df corrected root mean square of the residuals is 0.04
##
## The harmonic number of observations is 561 with the empirical chi square 3.54 with prob < 0.17
## The total number of observations was 619 with Likelihood Chi Square = 30.49 with prob < 2.4e-07
##
## Tucker Lewis Index of factoring reliability = 0.954
## RMSEA index = 0.152 and the 90 % confidence intervals are 0.107 0.202
## BIC = 17.63
## Fit based upon off diagonal values = 1
## Measures of factor score adequacy
##
##                                     MR1
## Correlation of (regression) scores with factors 0.96
## Multiple R square of scores with factors 0.92
## Minimum correlation of possible factor scores 0.85

```

#### Graded-Response Model: Substance Use

| ##     | Extrmt1 | Extrmt2 | Extrmt3 | Extrmt4 | Extrmt5 | Extrmt6 | Dscrmn |
|--------|---------|---------|---------|---------|---------|---------|--------|
| ## Q35 | -0.614  | -0.949  | -1.146  | -1.468  | -1.650  | -1.915  | -3.567 |
| ## Q4  | -0.968  | -1.313  | -1.521  | -1.707  | -1.919  | -2.193  | -3.321 |
| ## Q16 | -0.795  | -1.092  | -1.254  | -1.434  | -1.590  | -1.793  | -2.971 |
| ## Q59 | -0.612  | -0.878  | -1.022  | -1.146  | -1.423  | -1.605  | -3.849 |

## Test Information Function

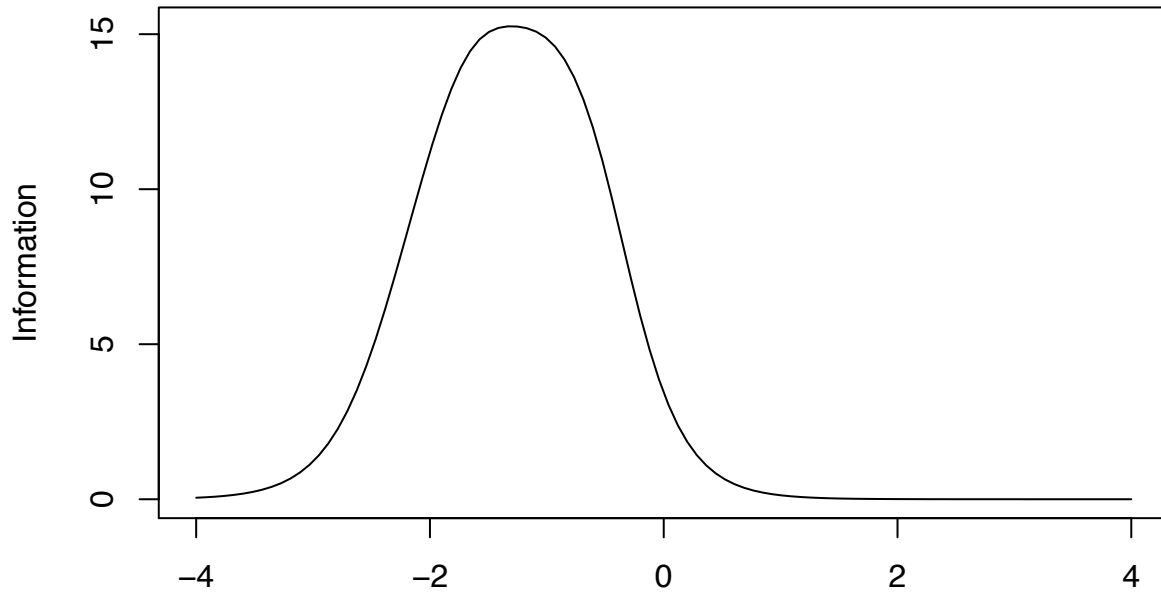

## Item Information Curves

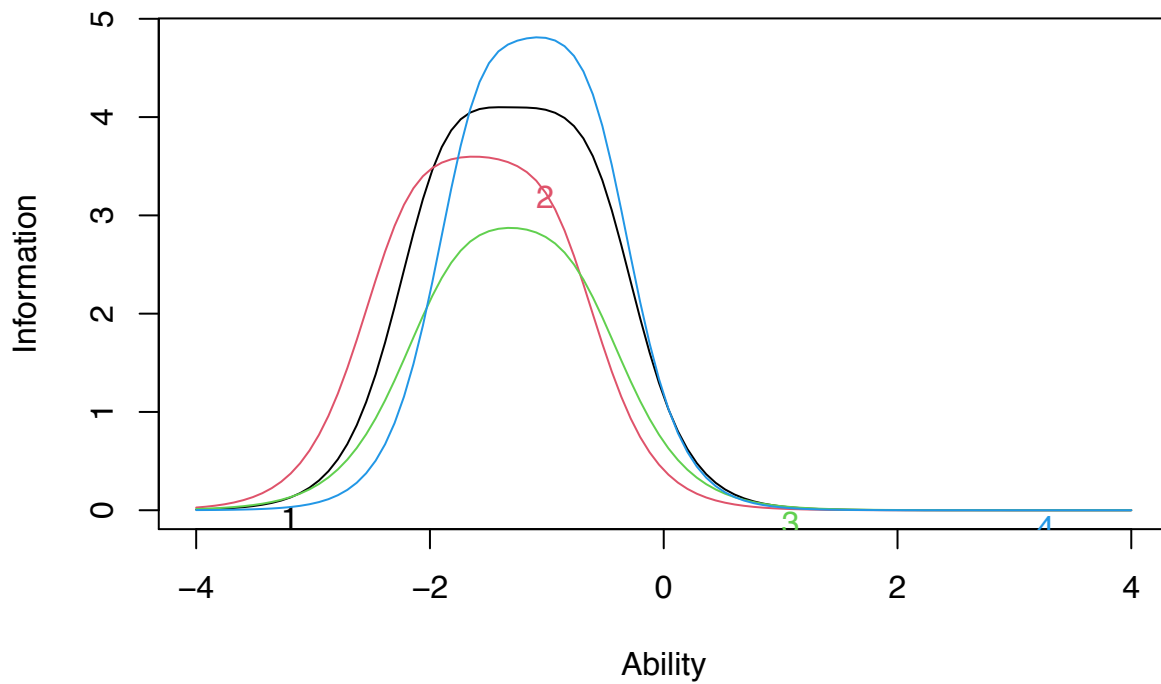

Gender-based DIF: Substance Use

## Call:

```
## lordif::lordif(resp.data = as.data.frame(sex.data), group = sex)
```

```
##
## Number of DIF groups: 2
##
## Number of items flagged for DIF: 0 of 4
##
## Items flagged:
##
## Number of iterations for purification: 1 of 10
##
## Detection criterion: Chisqr
##
## Threshold: alpha = 0.01
```

### Sample-based DIF: Substance Use

```
## Call:
## lordif::lordif(resp.data = as.data.frame(sample.data), group = clinYN)
##
## Number of DIF groups: 2
##
## Number of items flagged for DIF: 4 of 4
##
## Items flagged: 1, 2, 3, 4
##
## Number of iterations for purification: 1 of 10
##
## Detection criterion: Chisqr
##
## Threshold: alpha = 0.01
##
## item ncat chi12 chi13 chi23
## 1 1 4 0.0002 0.0000 0.0079
## 2 2 5 0.0024 0.0004 0.0106
## 3 3 4 0.0043 0.0140 0.5304
## 4 4 7 0.0045 0.0092 0.2518
```

Back to top

### Suicide Risk

#### Reliability: Suicide Risk

```
## Cronbach's alpha is 0.678.
## Mean item-total correlation is 0.343.
## If each item were dropped:
## raw_alpha std.alpha G6(smc) average_r S/N alpha se var.r med.r
## Q44 0.68 0.68 0.59 0.42 2.1 0.034 0.00058 0.42
## Q19 0.63 0.63 0.54 0.36 1.7 0.040 0.00507 0.35
## Q77 0.58 0.57 0.50 0.31 1.3 0.046 0.01859 0.35
## Q79 0.54 0.54 0.46 0.28 1.2 0.049 0.01391 0.30
```



Unidimensionality: Suicide Risk

### Scree Plot

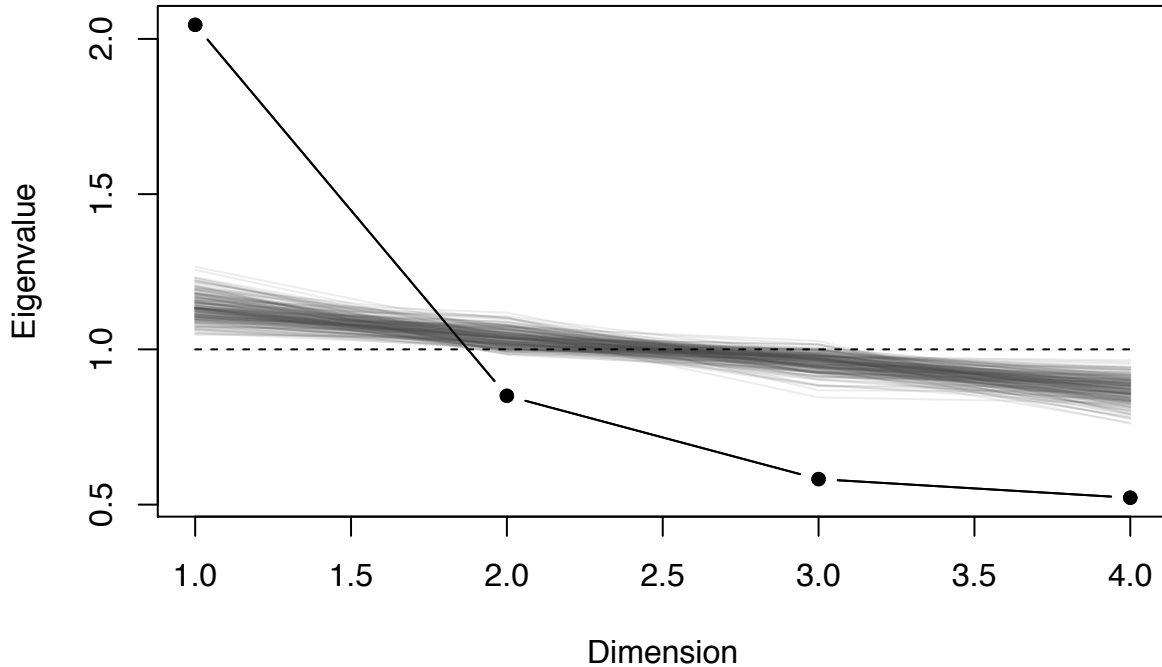

```
## [1] "Ratio of first to second eigenvalues: 2.405"  
## [1] 2.0452860 0.8503631 0.5821785 0.5221724  
## Factor Analysis using method = minres  
## Call: fa(r = grm_obj$X)  
## Standardized loadings (pattern matrix) based upon correlation matrix  
##      MR1  h2  u2 com  
## Q44 0.43 0.18 0.82  1  
## Q19 0.55 0.30 0.70  1  
## Q77 0.65 0.42 0.58  1  
## Q79 0.74 0.54 0.46  1  
##  
##              MR1  
## SS loadings  1.45  
## Proportion Var 0.36  
##  
## Mean item complexity = 1  
## Test of the hypothesis that 1 factor is sufficient.  
##  
## The degrees of freedom for the null model are 6 and the objective function was 0.64 with Chi Square  
## The degrees of freedom for the model are 2 and the objective function was 0.03  
##  
## The root mean square of the residuals (RMSR) is 0.04  
## The df corrected root mean square of the residuals is 0.07  
##  
## The harmonic number of observations is 257 with the empirical chi square 5.64 with prob < 0.06  
## The total number of observations was 257 with Likelihood Chi Square = 6.47 with prob < 0.039
```

```

##
## Tucker Lewis Index of factoring reliability = 0.914
## RMSEA index = 0.093 and the 90 % confidence intervals are 0.018 0.178
## BIC = -4.63
## Fit based upon off diagonal values = 0.99
## Measures of factor score adequacy
##
## Correlation of (regression) scores with factors MR1 0.85
## Multiple R square of scores with factors 0.72
## Minimum correlation of possible factor scores 0.44

```

**Graded-Response Model: Suicide Risk**

| ##     | Extrmt1 | Extrmt2 | Extrmt3 | Extrmt4 | Extrmt5 | Extrmt6 | Dscrmn |
|--------|---------|---------|---------|---------|---------|---------|--------|
| ## Q44 | -4.210  | -2.338  | -1.451  | -0.879  | -0.197  | 0.899   | 0.819  |
| ## Q19 | -1.722  | -0.994  | -0.298  | 0.401   | 1.216   | 1.914   | 1.399  |
| ## Q77 | -0.943  | -0.080  | 0.352   | 0.828   | 1.304   | 1.857   | 1.729  |
| ## Q79 | -0.313  | 0.264   | 0.720   | 1.025   | 1.459   | 1.933   | 1.798  |

**Test Information Function**

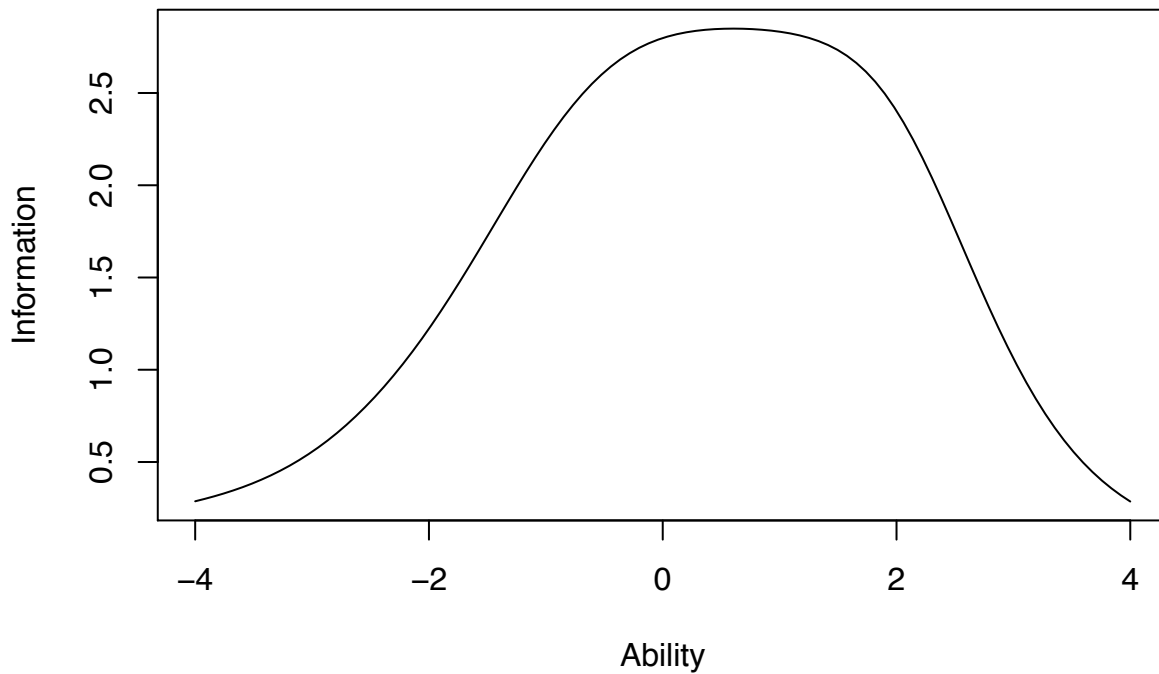

## Item Information Curves

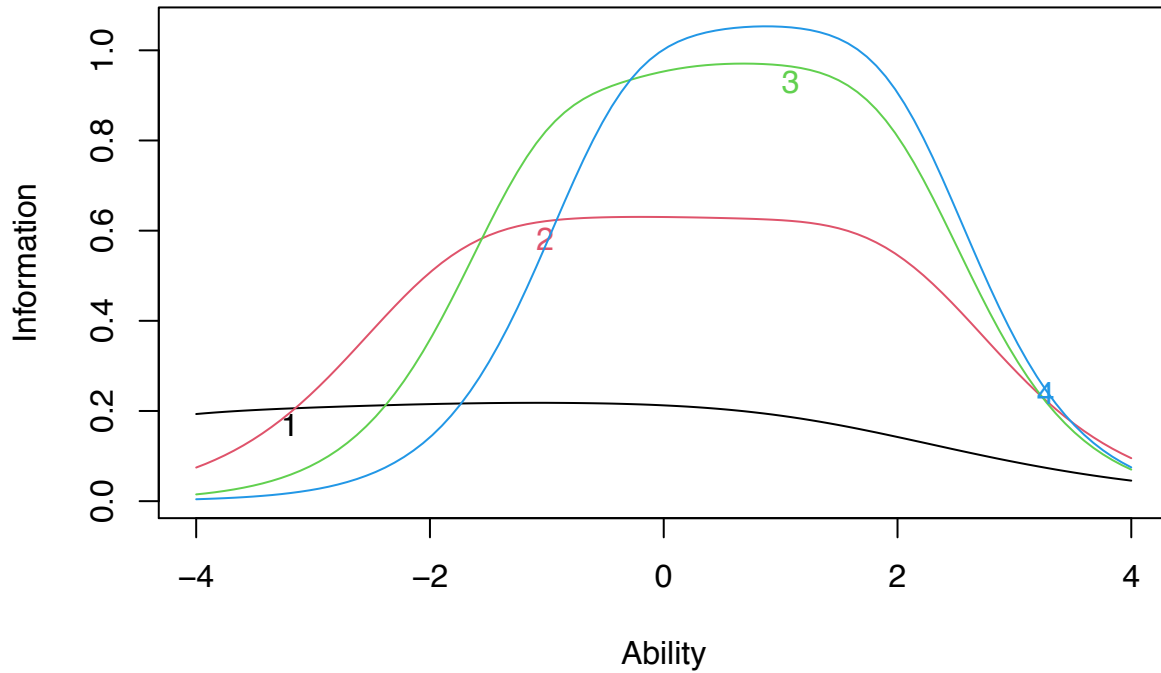

### Gender-based DIF: Suicide Risk

```
## Call:
## lordif::lordif(resp.data = as.data.frame(sex.data), group = sex)
##
##   Number of DIF groups: 2
##
##   Number of items flagged for DIF: 0 of 4
##
##   Items flagged:
##
##   Number of iterations for purification: 1 of 10
##
##   Detection criterion: Chisqr
##
##   Threshold: alpha = 0.01
```

### Sample-based DIF: Suicide Risk

```
## Call:
## lordif::lordif(resp.data = as.data.frame(sample.data), group = clinYN)
##
##   Number of DIF groups: 2
##
##   Number of items flagged for DIF: 0 of 4
##
##   Items flagged:
##
```

```
## Number of iterations for purification: 1 of 10
##
## Detection criterion: Chisqr
##
## Threshold: alpha = 0.01
```

Back to top

## Study 2: ROC curves

For each scale, unadjusted scale scores are compared between the clinical and nonclinical samples in Study 2. For those scales that demonstrated substantial sample-based DIF (Connectedness, Demoralization, Pressure from Negative Affect, Relational Distress, and Somatic Anxiety), these comparisons should not be interpreted.

In all cases, the ROC curve and the area under the curve are presented below. The AUC appears in the manuscript as well.

### Attachment

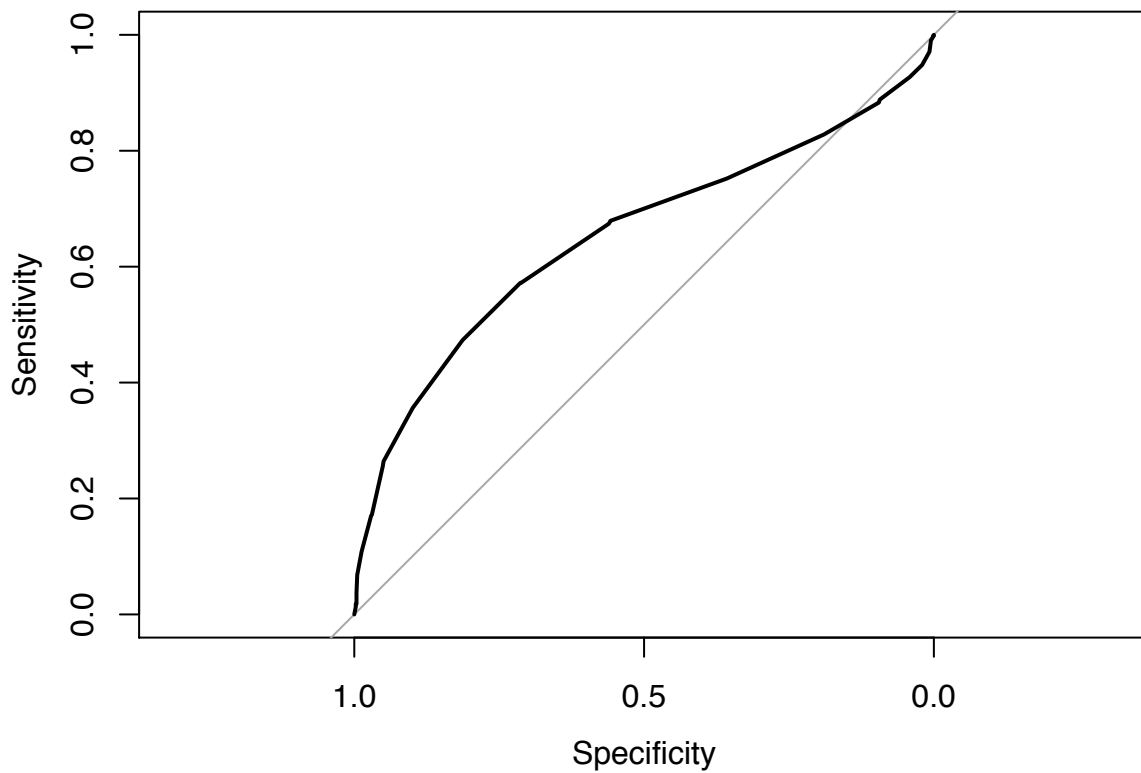

```
## Area under the curve: 0.6532
```

# Avoidance

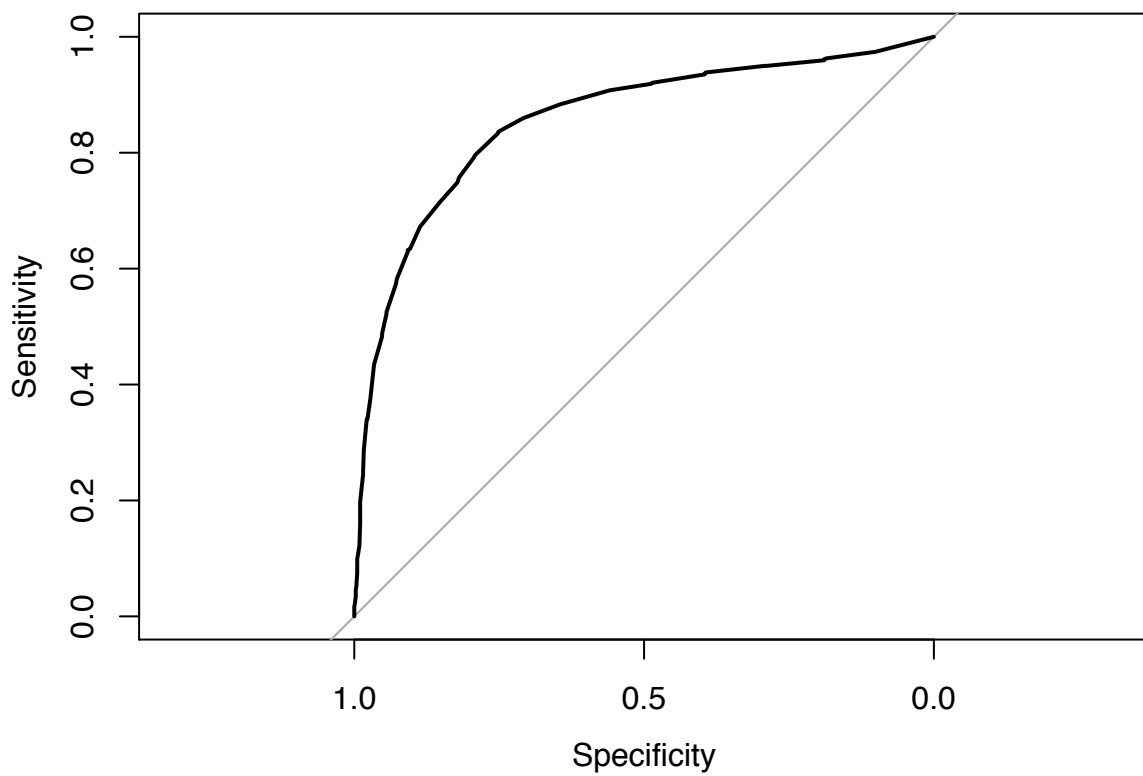

## Area under the curve: 0.8564

## Connectedness

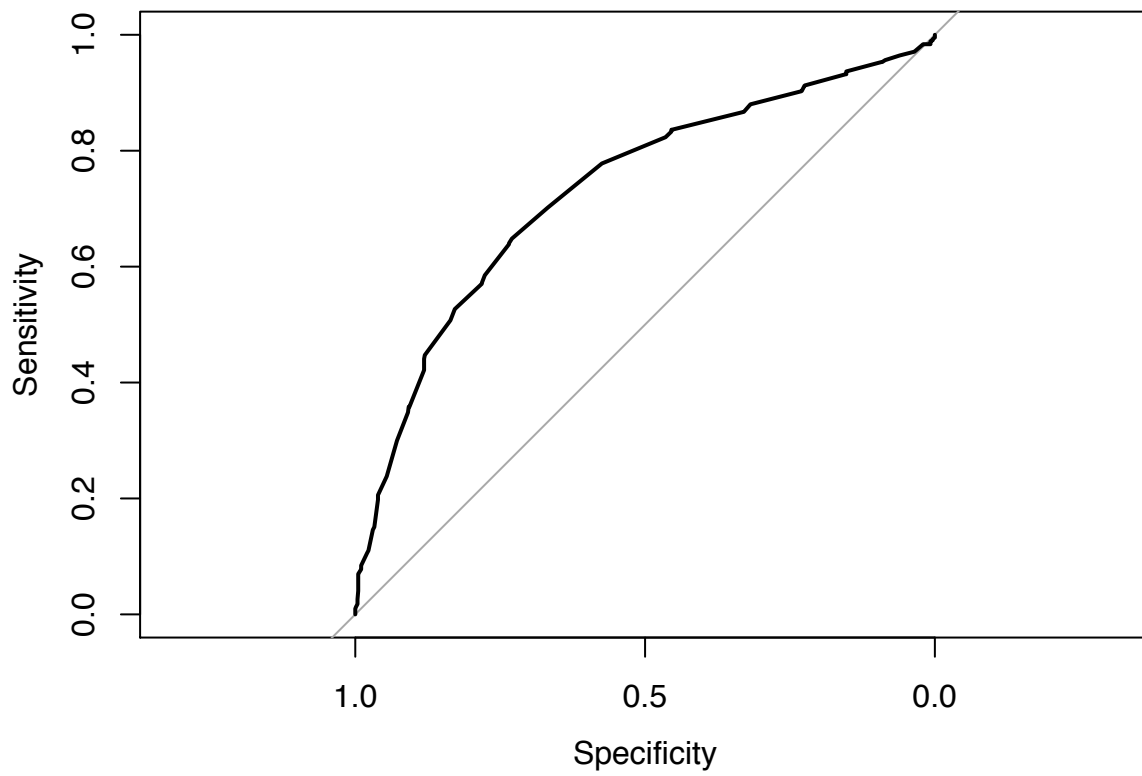

## Area under the curve: 0.7321

## Demoralization

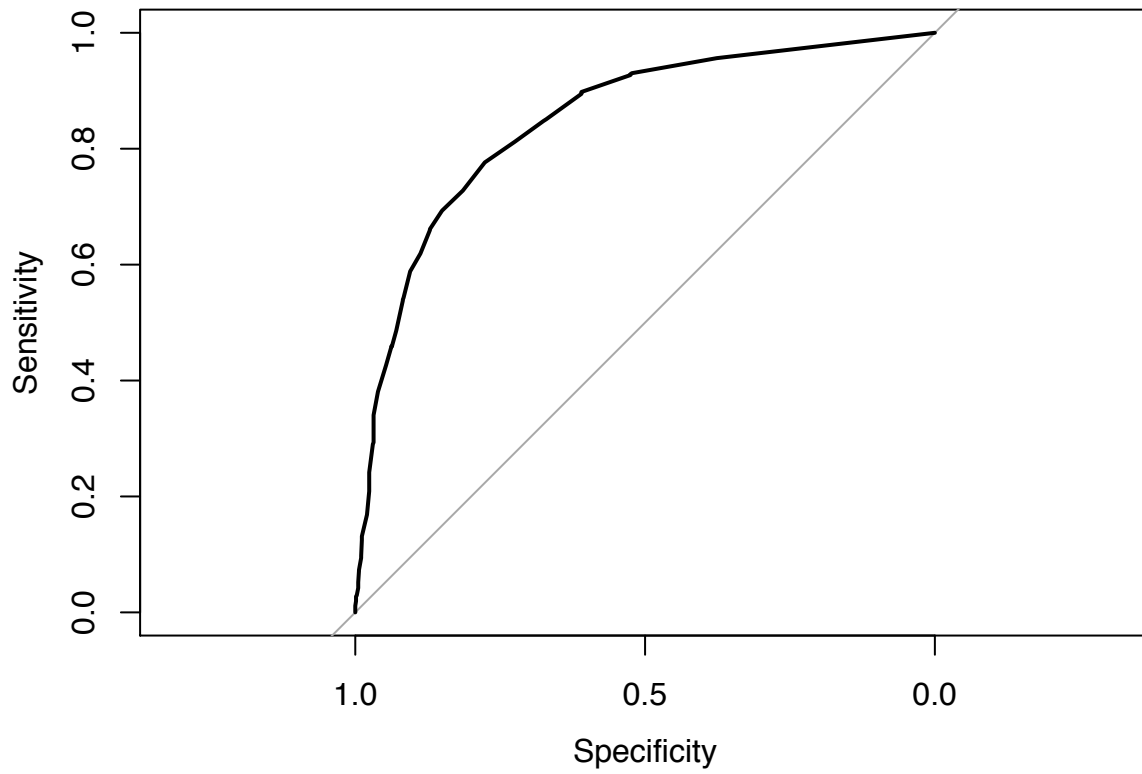

## Area under the curve: 0.8483

## Eating problems

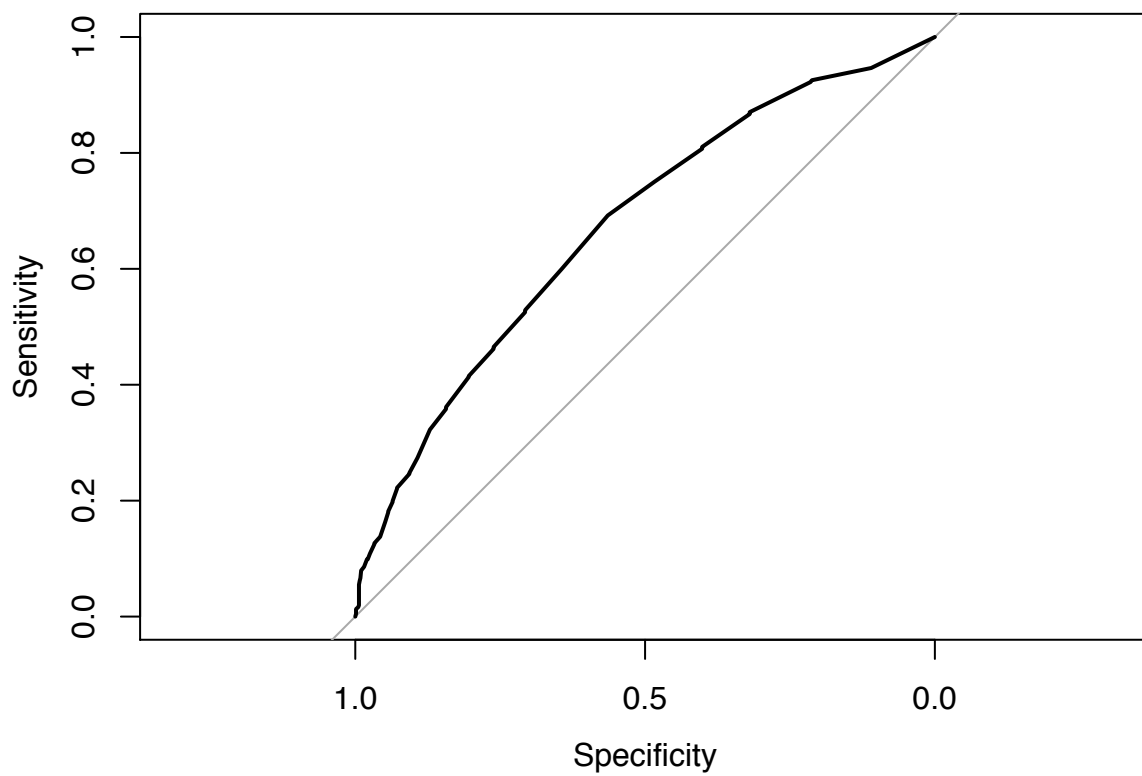

## Area under the curve: 0.6715



## Hurtful rumination

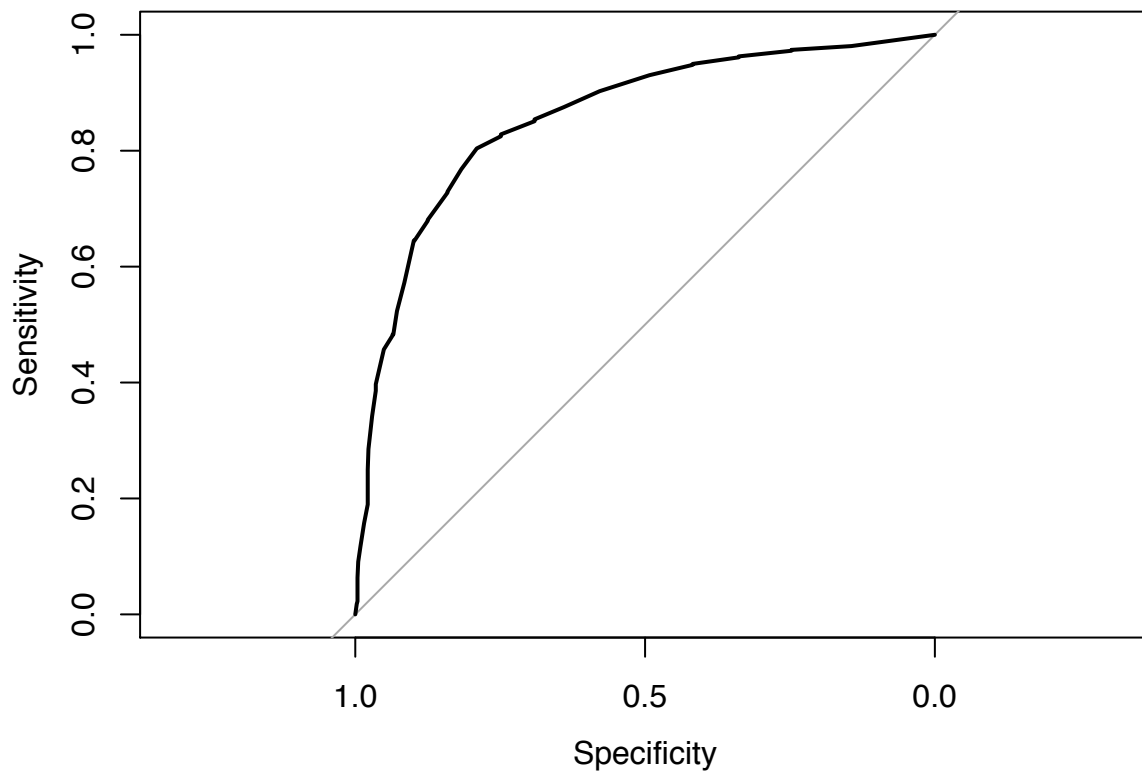

## Area under the curve: 0.8572

## Hypervigilance

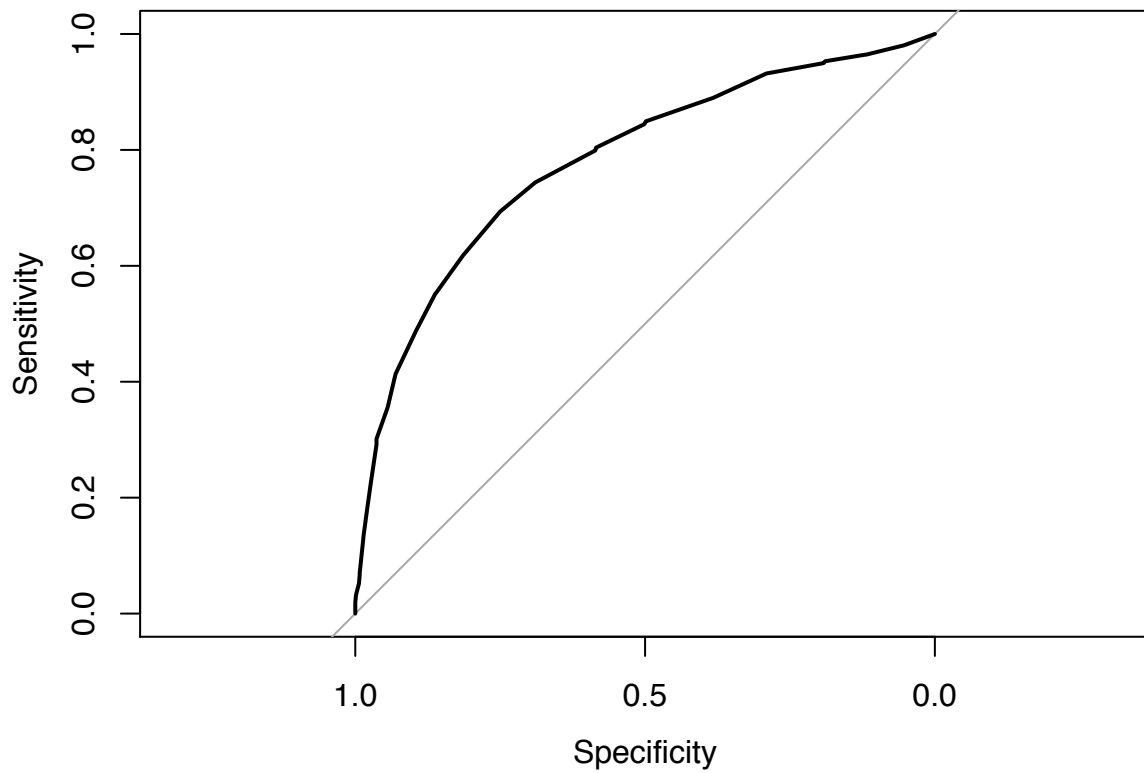

## Area under the curve: 0.78

## Perfectionism

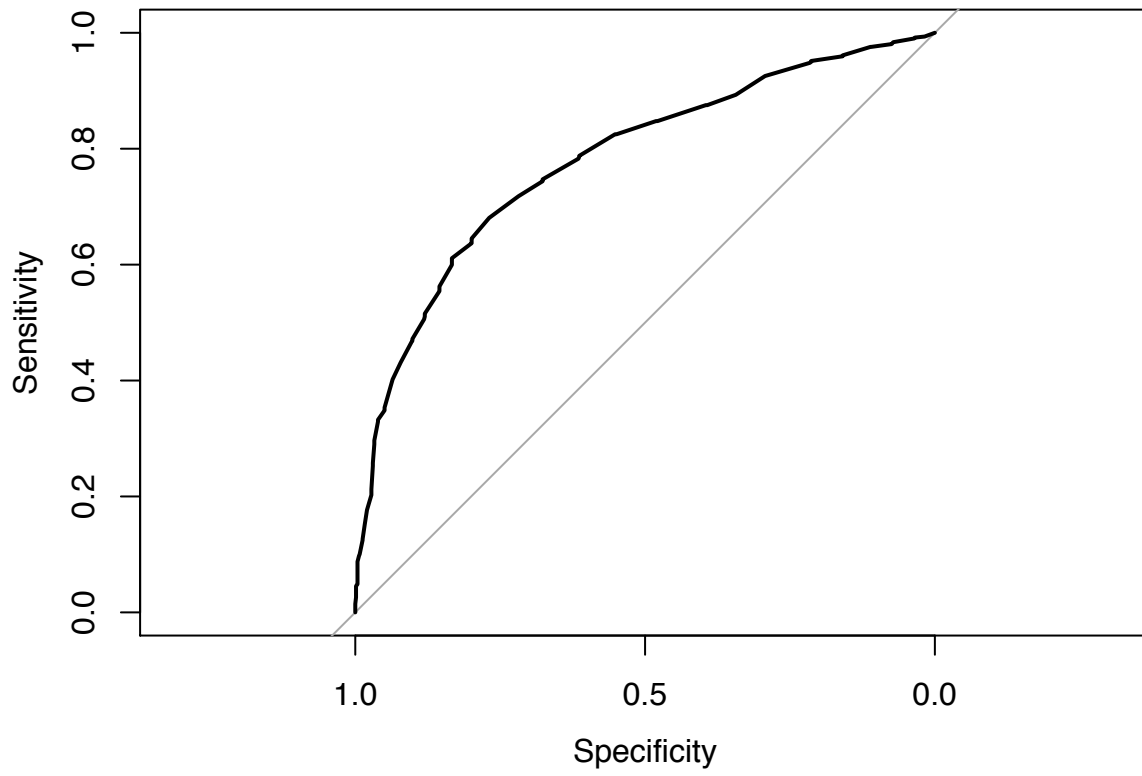

## Area under the curve: 0.7799

## Pressure from Negative Affect

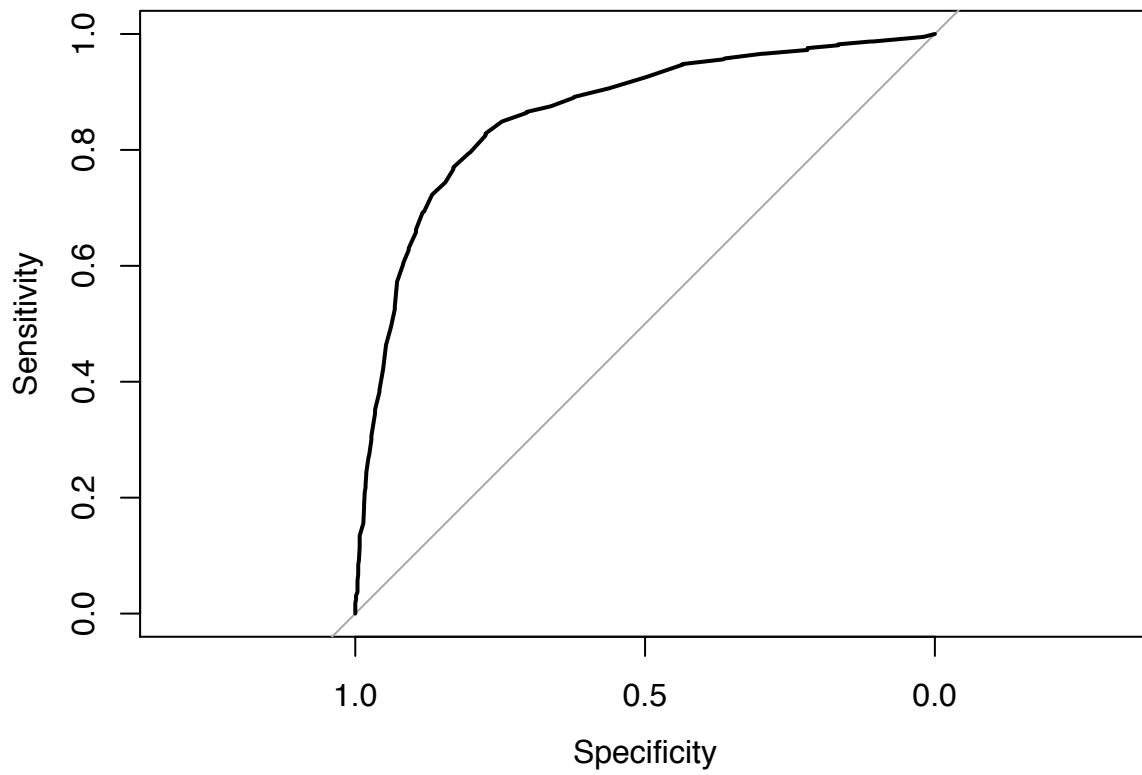

## Area under the curve: 0.8626

# Psychosis

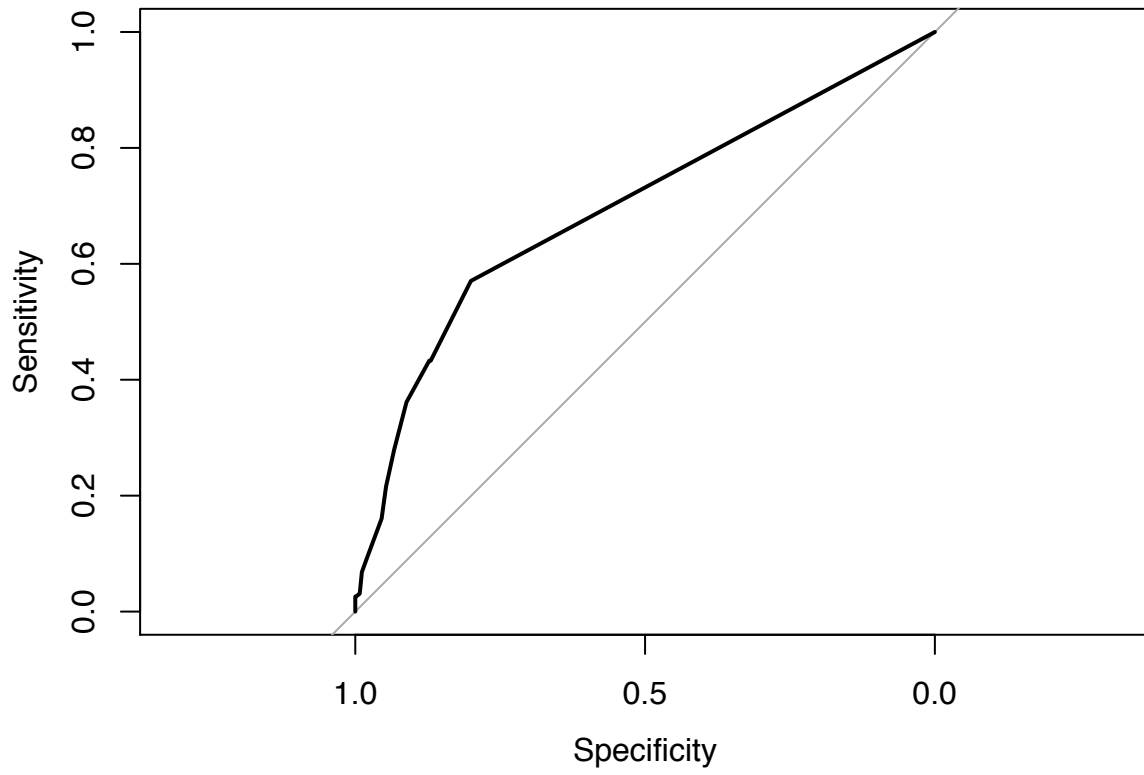

## Area under the curve: 0.6961

## Relational distress

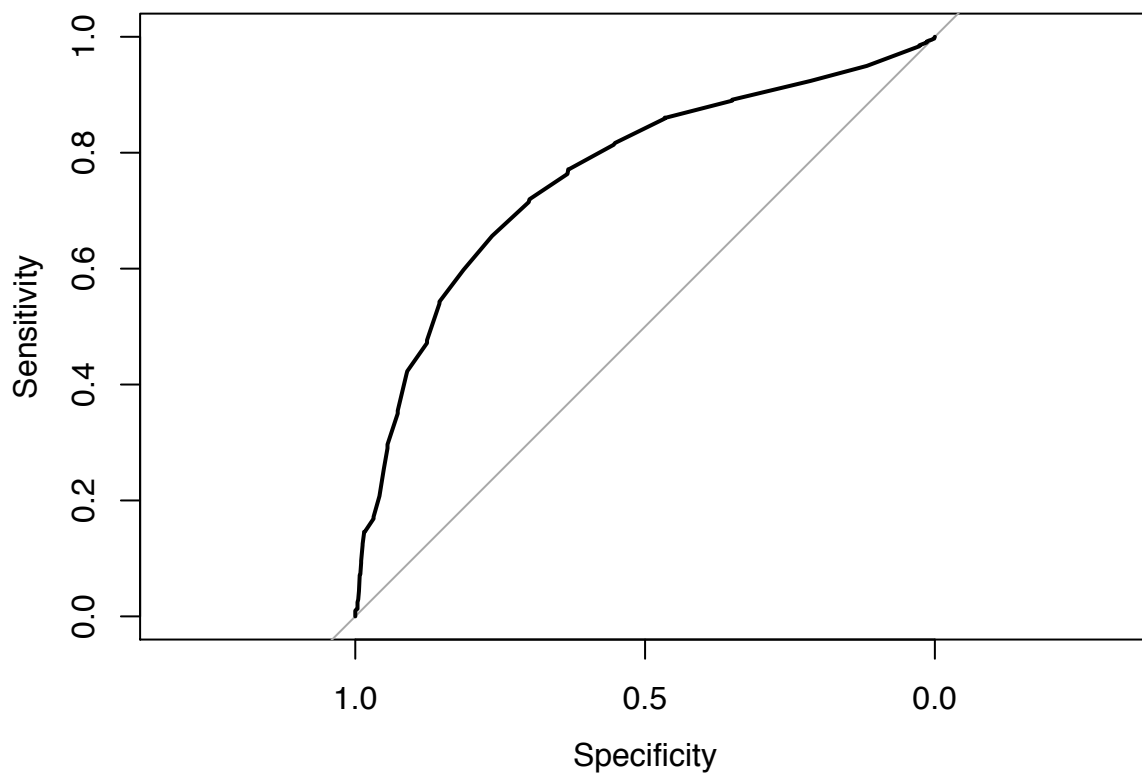

## Area under the curve: 0.7612

## Resilience

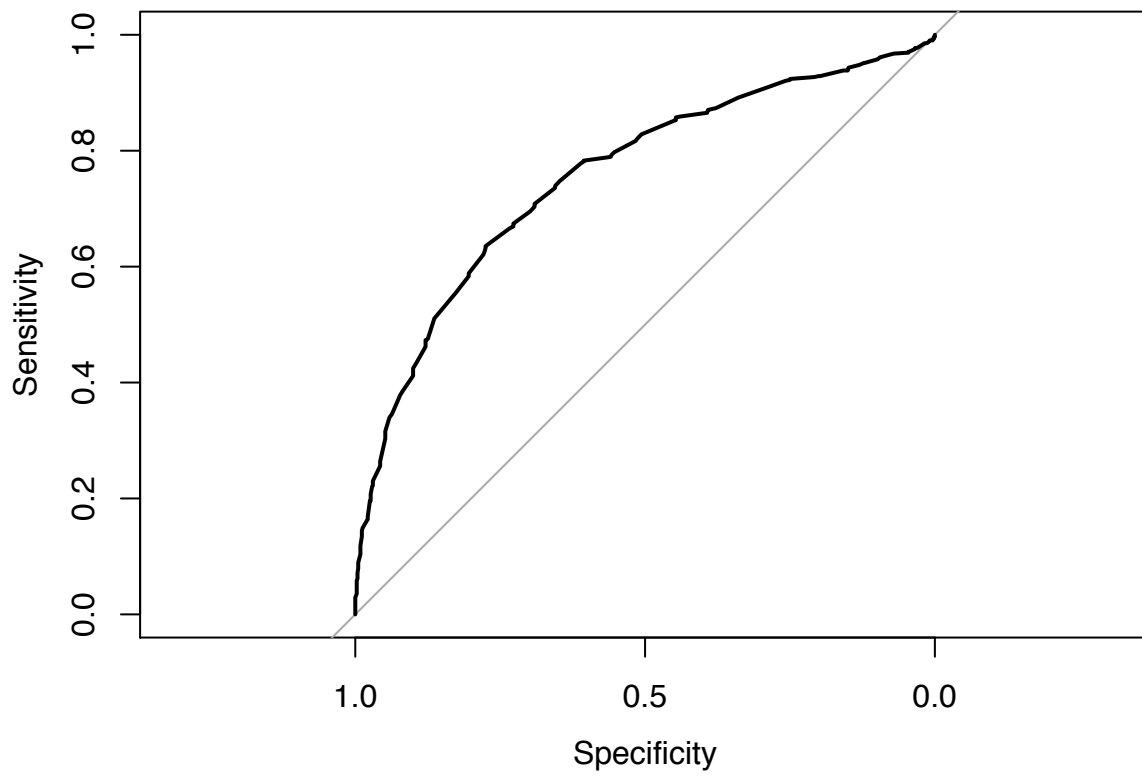

## Area under the curve: 0.7562

## Social Role Functioning

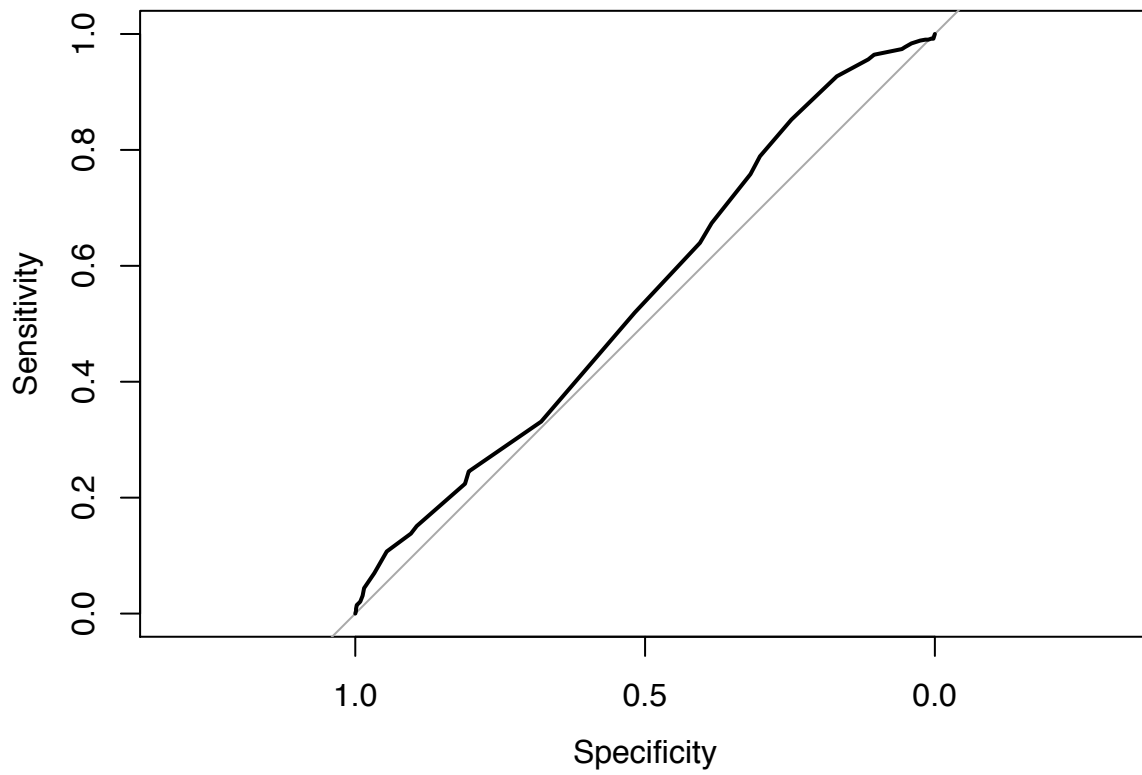

## Area under the curve: 0.5482



## Somatic Anxiety

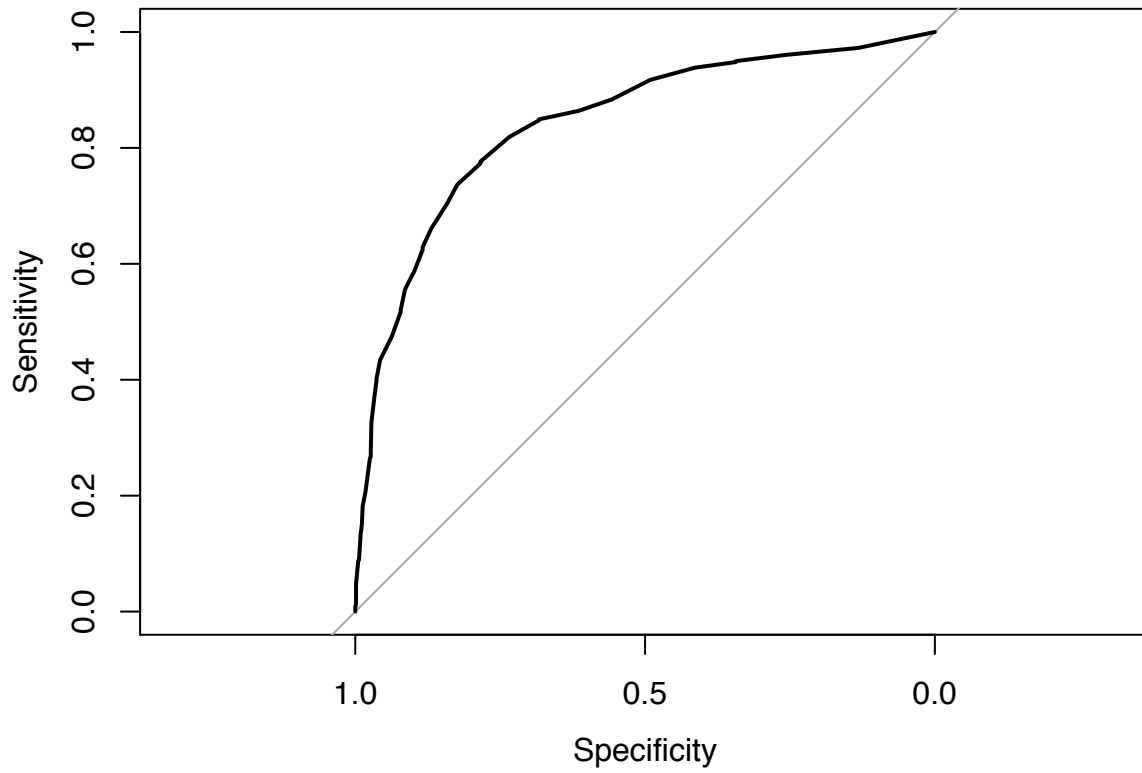

## Area under the curve: 0.8426

# Substance Use

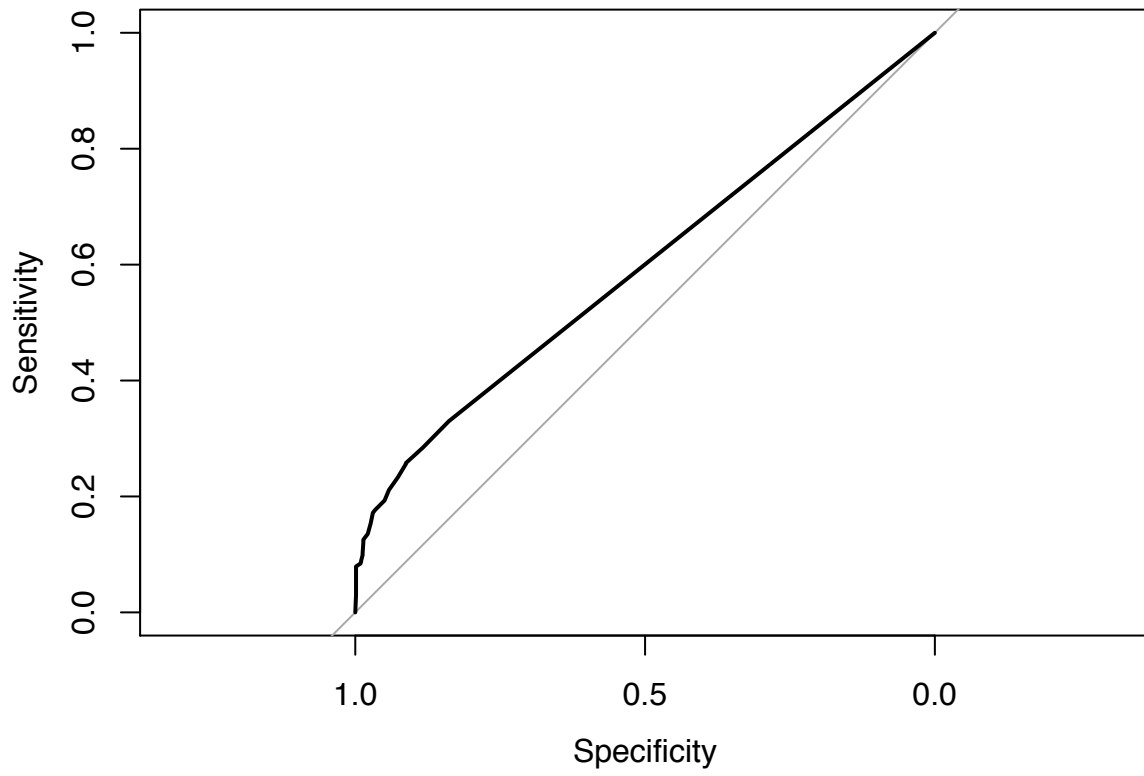

## Area under the curve: 0.5948

## Suicide Risk

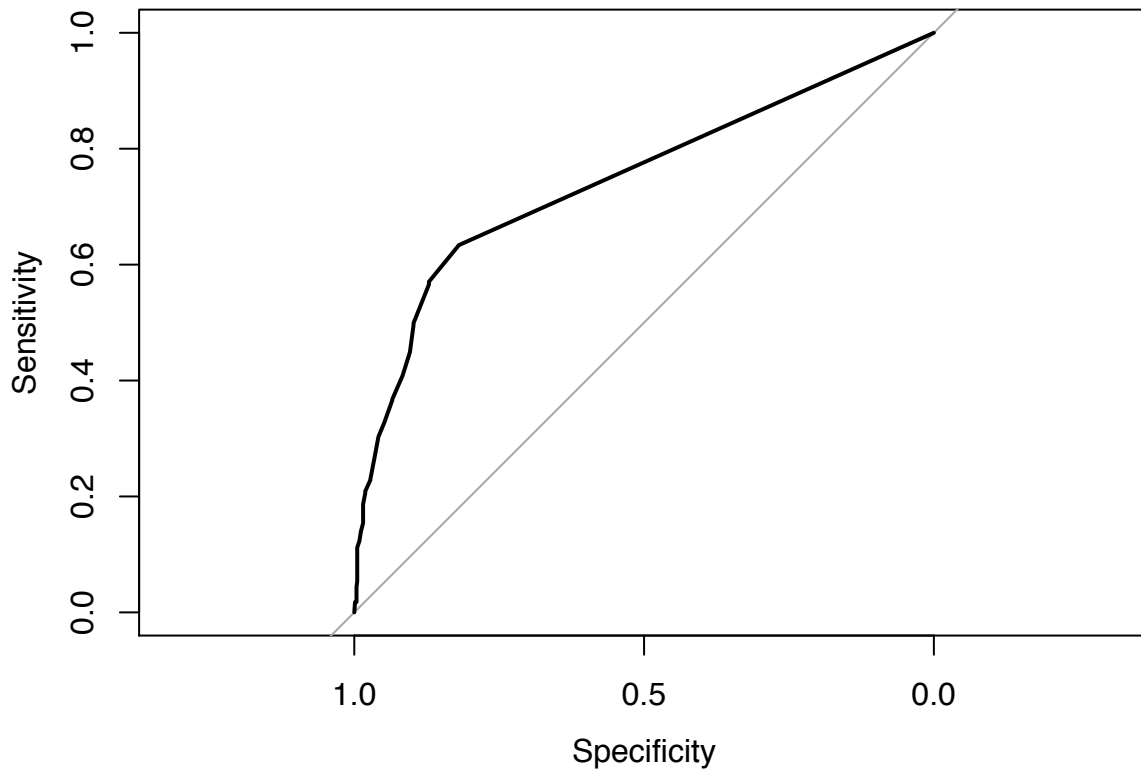

## Area under the curve: 0.7457

## Study 3: Scale performance

### Eating Problems

#### Site 1

#### Reliability: Eating Problems

## Cronbach's alpha is 0.86.

## Mean item-total correlation is 0.561.

## If each item were dropped:

| ##      | raw_alpha | std.alpha | G6(smc) | average_r | S/N | alpha se | var.r  | med.r |
|---------|-----------|-----------|---------|-----------|-----|----------|--------|-------|
| ## Q46  | 0.82      | 0.83      | 0.79    | 0.55      | 4.9 | 0.012    | 0.0044 | 0.56  |
| ## Q104 | 0.84      | 0.85      | 0.81    | 0.58      | 5.5 | 0.010    | 0.0013 | 0.57  |
| ## Q57  | 0.84      | 0.85      | 0.81    | 0.58      | 5.5 | 0.010    | 0.0022 | 0.57  |
| ## Q18  | 0.83      | 0.83      | 0.79    | 0.55      | 4.9 | 0.011    | 0.0027 | 0.56  |
| ## Q63  | 0.82      | 0.83      | 0.79    | 0.55      | 4.8 | 0.011    | 0.0031 | 0.57  |

## Scree Plot

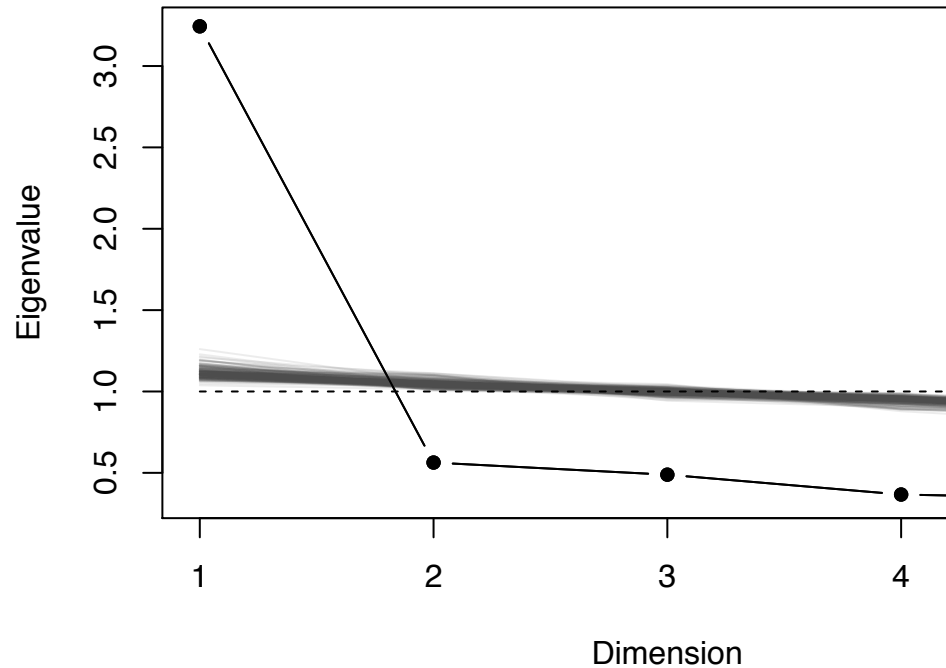

### Unidimensionality: Eating Problems

```
## [1] "Ratio of first to second eigenvalues: 5.76"
## [1] 3.2438805 0.5631446 0.4885950 0.3666453 0.3377346
## Factor Analysis using method = minres
## Call: fa(r = grm_obj$X)
## Standardized loadings (pattern matrix) based upon correlation matrix
##      MR1  h2  u2 com
## Q46  0.78 0.60 0.40  1
## Q104 0.70 0.49 0.51  1
## Q57  0.71 0.50 0.50  1
## Q18  0.77 0.59 0.41  1
## Q63  0.79 0.62 0.38  1
##
##              MR1
## SS loadings    2.81
## Proportion Var 0.56
##
## Mean item complexity = 1
## Test of the hypothesis that 1 factor is sufficient.
##
## The degrees of freedom for the null model are 10 and the objective function was 2.2 with Chi Square
## The degrees of freedom for the model are 5 and the objective function was 0.07
##
## The root mean square of the residuals (RMSR) is 0.03
## The df corrected root mean square of the residuals is 0.05
##
## The harmonic number of observations is 592 with the empirical chi square 14.43 with prob < 0.013
## The total number of observations was 617 with Likelihood Chi Square = 40.05 with prob < 1.5e-07
##
## Tucker Lewis Index of factoring reliability = 0.948
```

```

## RMSEA index = 0.107 and the 90 % confidence intervals are 0.077 0.138
## BIC = 7.92
## Fit based upon off diagonal values = 1
## Measures of factor score adequacy
##
## Correlation of (regression) scores with factors MR1 0.93
## Multiple R square of scores with factors 0.87
## Minimum correlation of possible factor scores 0.74

```

**Graded-Response Model: Eating Problems**

| ##      | Extrmt1 | Extrmt2 | Extrmt3 | Extrmt4 | Extrmt5 | Extrmt6 | Dscrmn |
|---------|---------|---------|---------|---------|---------|---------|--------|
| ## Q46  | -0.219  | 0.219   | 0.513   | 0.797   | 1.144   | 1.446   | 2.405  |
| ## Q104 | -0.722  | -0.216  | 0.084   | 0.367   | 0.753   | 1.108   | 2.363  |
| ## Q57  | 0.595   | 0.964   | 1.246   | 1.464   | 1.697   | 1.960   | 2.657  |
| ## Q18  | 0.415   | 0.889   | 1.108   | 1.334   | 1.613   | 1.917   | 3.116  |
| ## Q63  | -0.216  | 0.242   | 0.565   | 0.832   | 1.254   | 1.581   | 2.544  |

**Test Information Function**

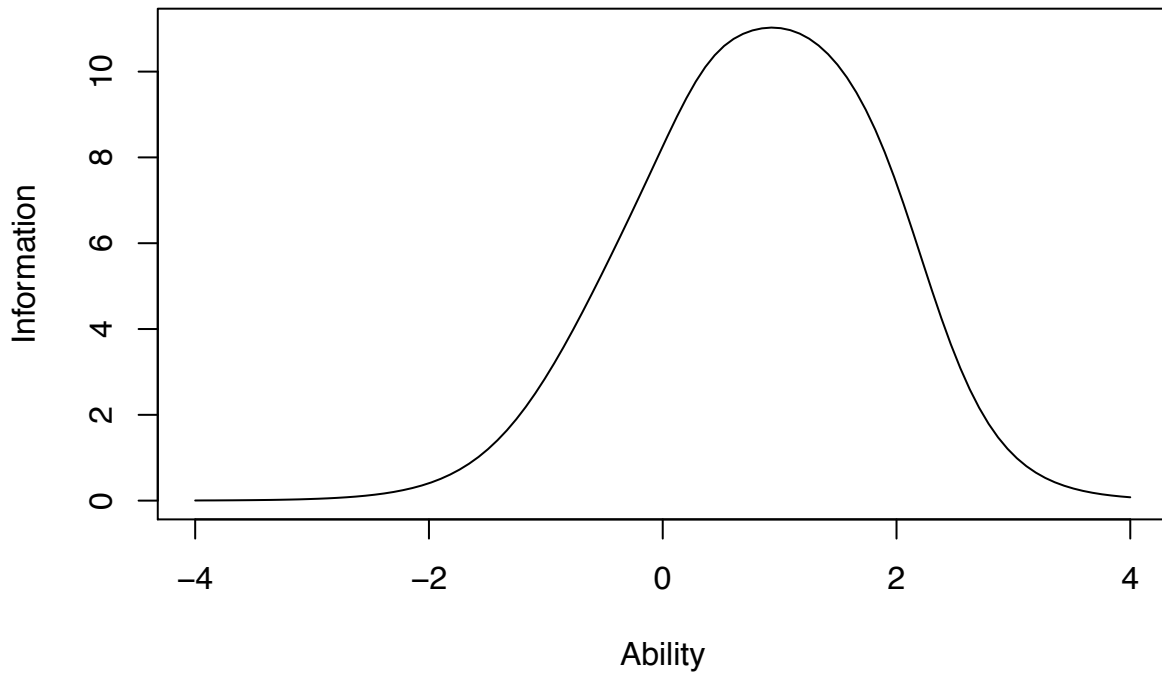

## Item Information Curves

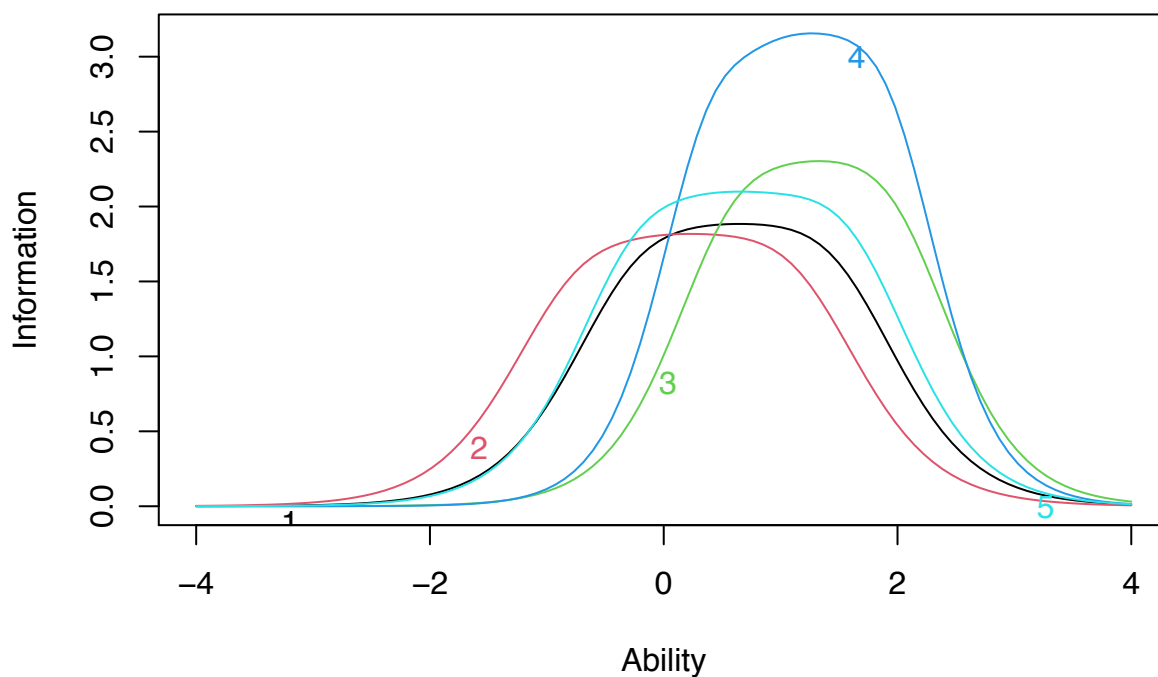

Back to top

### Site 2

#### Reliability: Eating Problems

## Cronbach's alpha is 0.836.

## Mean item-total correlation is 0.525.

## If each item were dropped:

| ##      | raw_alpha | std.alpha | G6(smc) | average_r | S/N | alpha se | var.r  | med.r |
|---------|-----------|-----------|---------|-----------|-----|----------|--------|-------|
| ## Q46  | 0.78      | 0.80      | 0.76    | 0.50      | 4.0 | 0.014    | 0.0034 | 0.50  |
| ## Q104 | 0.81      | 0.82      | 0.78    | 0.53      | 4.6 | 0.012    | 0.0036 | 0.54  |
| ## Q57  | 0.82      | 0.83      | 0.79    | 0.55      | 5.0 | 0.012    | 0.0022 | 0.55  |
| ## Q18  | 0.80      | 0.80      | 0.76    | 0.50      | 4.1 | 0.013    | 0.0041 | 0.51  |
| ## Q63  | 0.81      | 0.82      | 0.78    | 0.53      | 4.6 | 0.012    | 0.0042 | 0.53  |

## Scree Plot

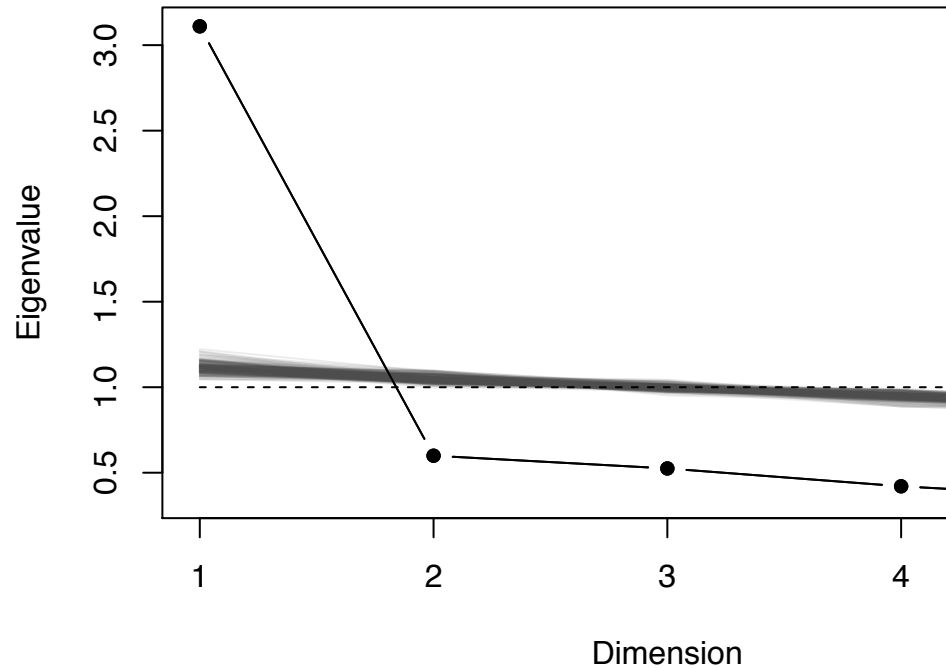

### Unidimensionality: Eating Problems

```
## [1] "Ratio of first to second eigenvalues: 5.188"
## [1] 3.1099043 0.5994110 0.5250118 0.4206820 0.3449910
## Factor Analysis using method = minres
## Call: fa(r = grm_obj$X)
## Standardized loadings (pattern matrix) based upon correlation matrix
##      MR1  h2  u2 com
## Q46  0.79 0.63 0.37  1
## Q104 0.70 0.49 0.51  1
## Q57  0.65 0.42 0.58  1
## Q18  0.78 0.61 0.39  1
## Q63  0.70 0.50 0.50  1
##
##              MR1
## SS loadings   2.65
## Proportion Var 0.53
##
## Mean item complexity = 1
## Test of the hypothesis that 1 factor is sufficient.
##
## The degrees of freedom for the null model are 10 and the objective function was 1.95 with Chi Square
## The degrees of freedom for the model are 5 and the objective function was 0.05
##
## The root mean square of the residuals (RMSR) is 0.03
## The df corrected root mean square of the residuals is 0.04
##
## The harmonic number of observations is 572 with the empirical chi square 11.25 with prob < 0.047
## The total number of observations was 596 with Likelihood Chi Square = 28.49 with prob < 2.9e-05
##
## Tucker Lewis Index of factoring reliability = 0.959
```

```

## RMSEA index = 0.089 and the 90 % confidence intervals are 0.059 0.122
## BIC = -3.46
## Fit based upon off diagonal values = 1
## Measures of factor score adequacy
##
## Correlation of (regression) scores with factors MR1 0.93
## Multiple R square of scores with factors 0.86
## Minimum correlation of possible factor scores 0.71

```

**Graded-Response Model: Eating Problems**

| ##      | Extrmt1 | Extrmt2 | Extrmt3 | Extrmt4 | Extrmt5 | Extrmt6 | Dscrmn |
|---------|---------|---------|---------|---------|---------|---------|--------|
| ## Q46  | -1.087  | -1.272  | -1.337  | -1.577  | -1.692  | -1.817  | -3.757 |
| ## Q104 | 0.022   | -0.590  | -0.940  | -1.299  | -1.680  | -1.780  | -1.931 |
| ## Q57  | -1.098  | -1.372  | -1.452  | -1.707  | -1.906  | -2.019  | -3.293 |
| ## Q18  | -1.207  | -1.595  | -1.757  | -2.001  | -2.165  | -2.255  | -3.501 |
| ## Q63  | -0.745  | -1.171  | -1.416  | -1.915  | -2.193  | -2.336  | -2.628 |

**Test Information Function**

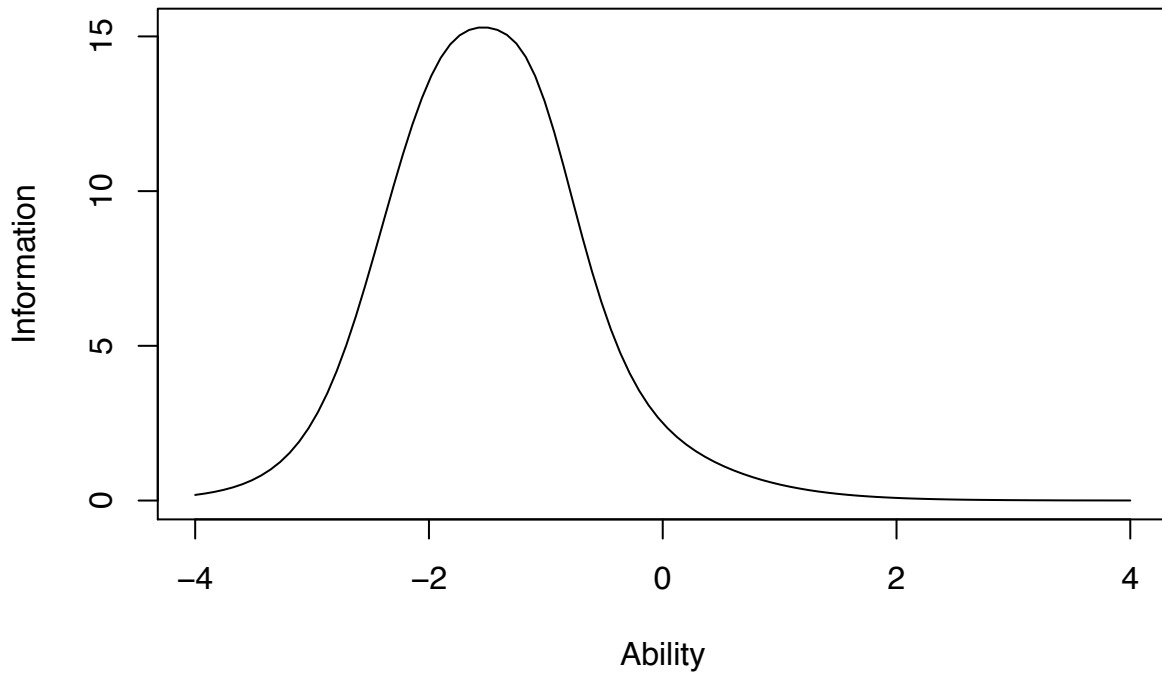



## Item Information Curves

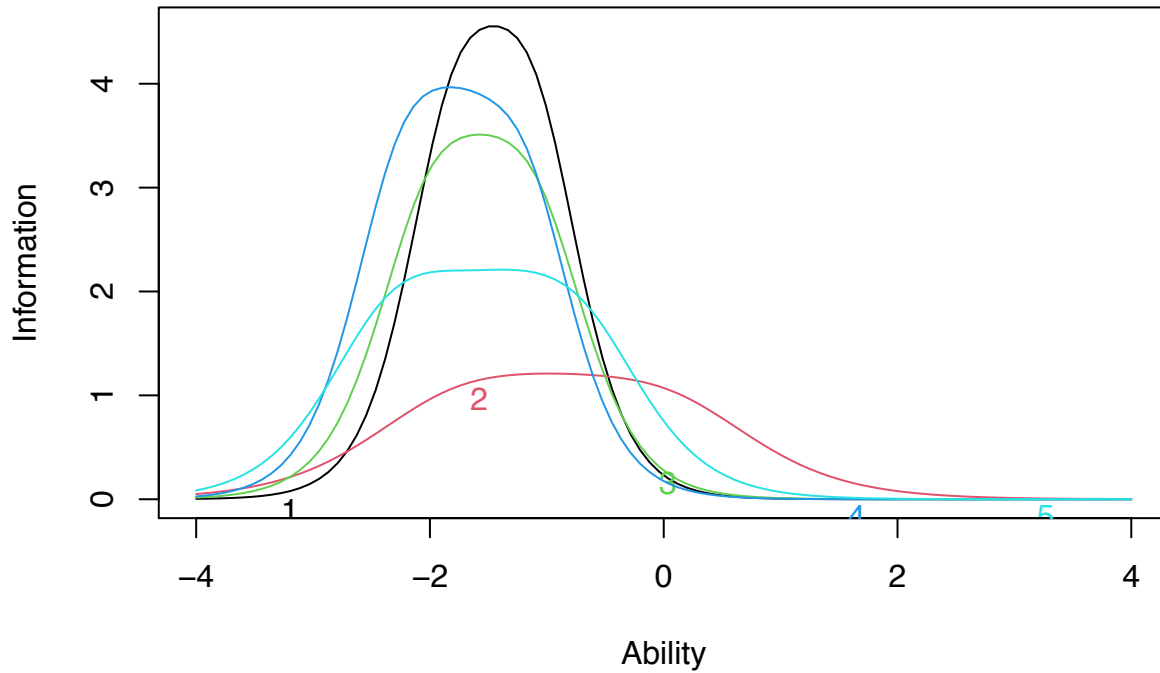

Back to top

### Site DIF

```
## Call:
## lordif::lordif(resp.data = as.data.frame(merged_data), group = site)
##
## Number of DIF groups: 2
##
## Number of items flagged for DIF: 1 of 5
##
## Items flagged: 1
##
## Number of iterations for purification: 3 of 10
##
## Detection criterion: Chisqr
##
## Threshold: alpha = 0.01
##
## item ncat chi12 chi13 chi23
## 1 1 7 0.0000 0.0000 0.0003
## 2 2 7 0.2634 0.1704 0.1303
## 3 3 7 0.2341 0.2054 0.1859
## 4 4 7 0.0414 0.1130 0.6533
## 5 5 7 0.7899 0.9417 0.8246
```

### Trait Distributions

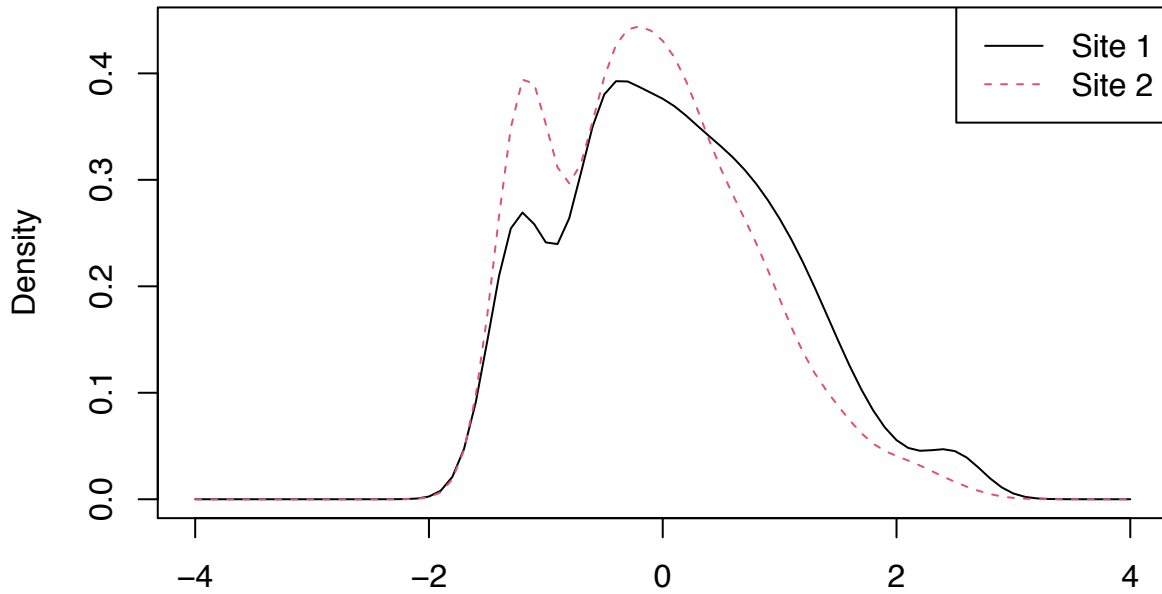

### Item True Score Functions – Item 1

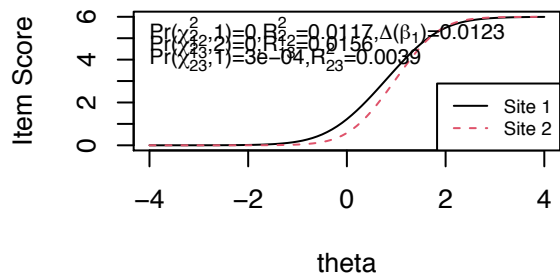

### Differences in Item True Score Function

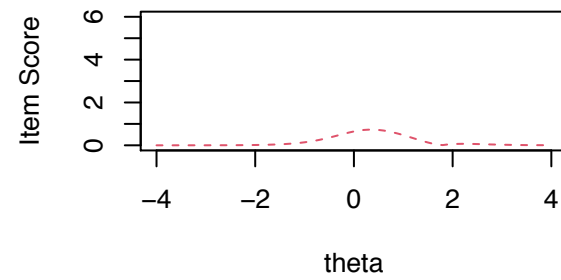

### Item Response Functions

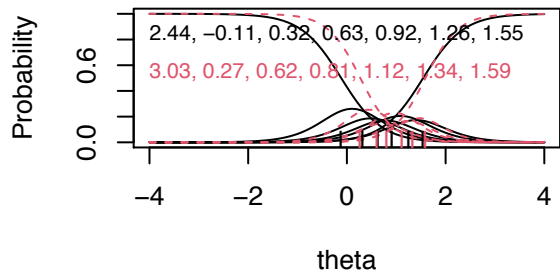

### Impact (Weighted by Density)

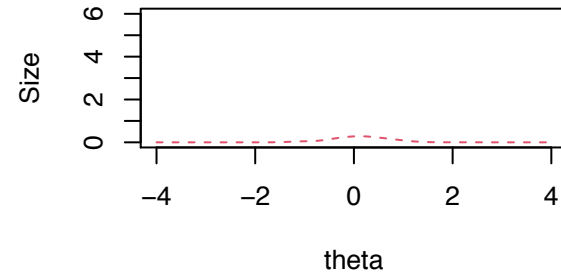

**All Items**

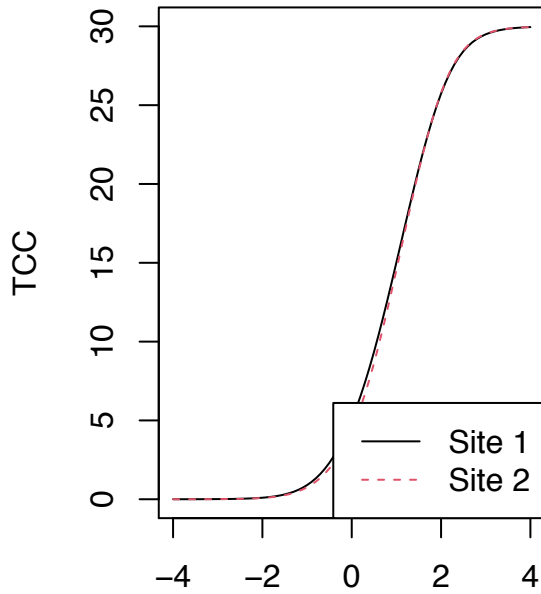

**DIF Items**

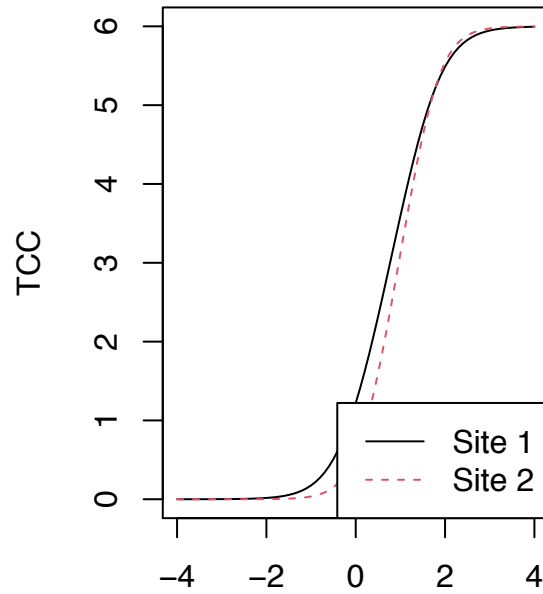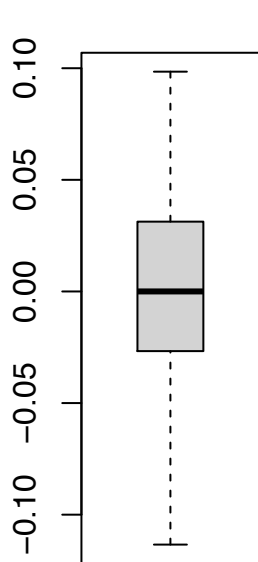

theta

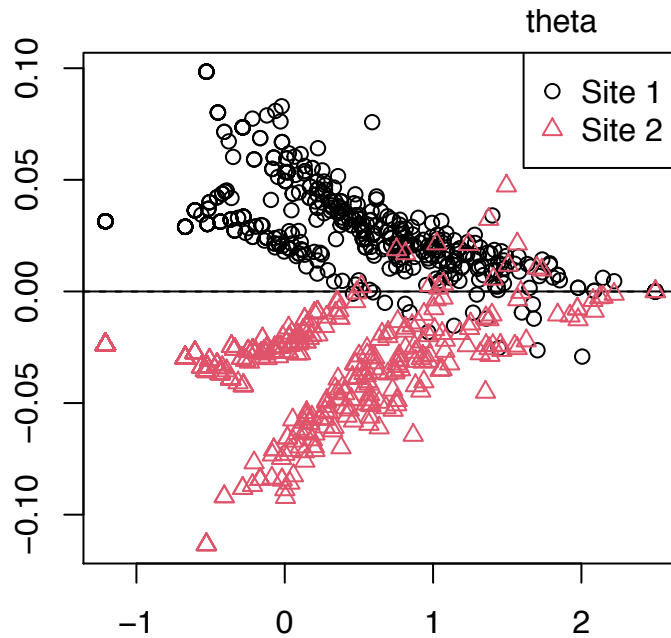

theta

initial theta

[Back to top](#)

### Gender-based DIF: Eating Problems

```
## Call:  
## lordif::lordif(resp.data = as.data.frame(sex.data), group = sex)  
##
```

```

## Number of DIF groups: 2
##
## Number of items flagged for DIF: 3 of 5
##
## Items flagged: 1, 2, 4
##
## Number of iterations for purification: 5 of 10
##
## Detection criterion: Chisqr
##
## Threshold: alpha = 0.01
##
## item ncat chi12 chi13 chi23
## 1 1 7 0.0000 0.0000 0.1223
## 2 2 7 0.0000 0.0000 0.3713
## 3 3 6 0.3378 0.3189 0.2423
## 4 4 4 0.0000 0.0000 0.2853
## 5 5 7 0.2097 0.4488 0.8653

```

### Trait Distributions

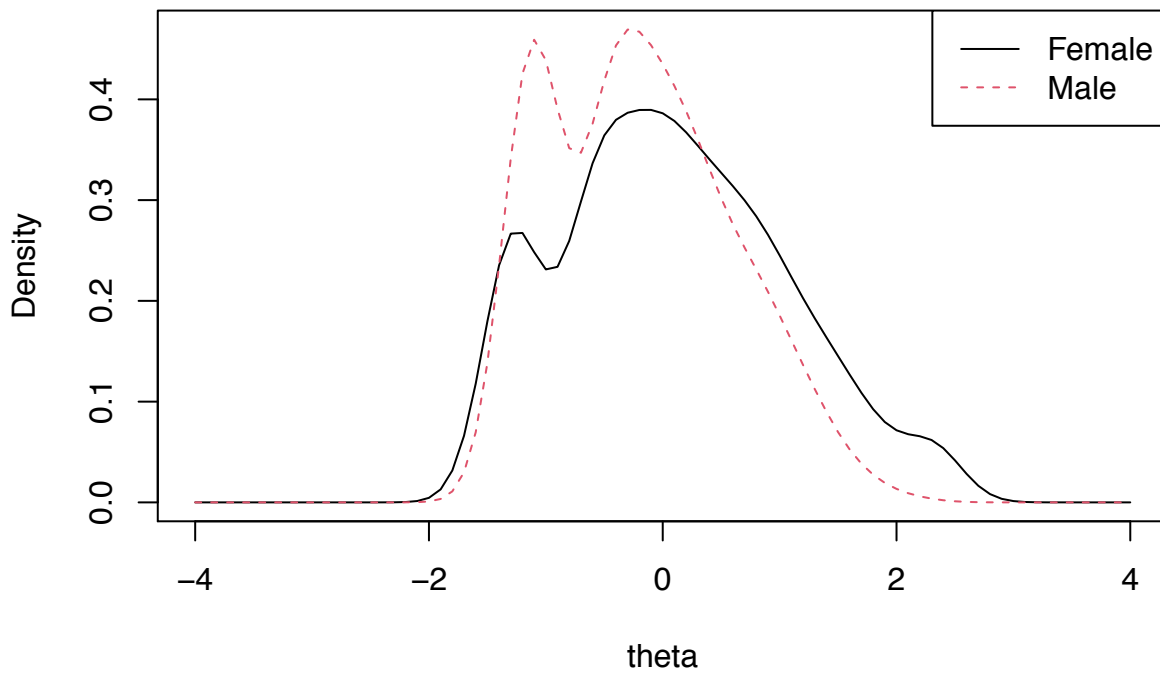

### Item True Score Functions – Item 1

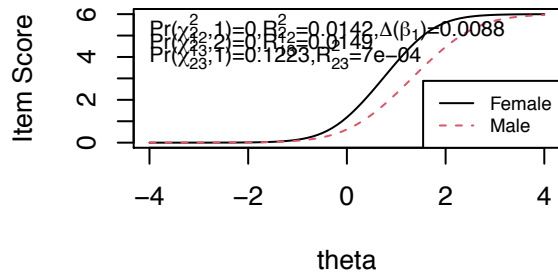

### Differences in Item True Score Function

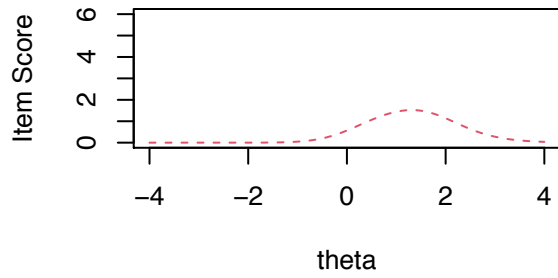

### Item Response Functions

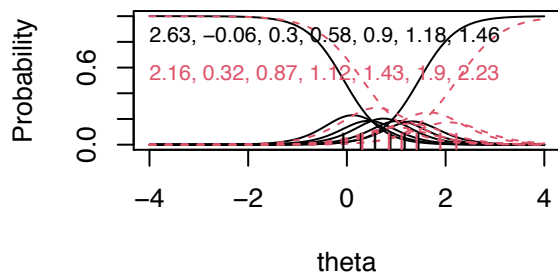

### Impact (Weighted by Density)

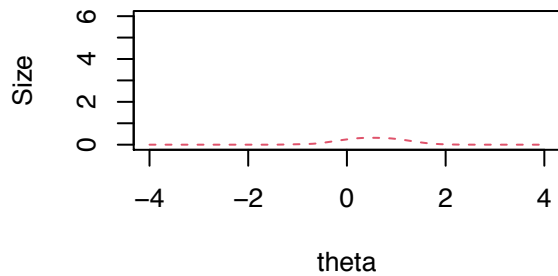

### Item True Score Functions – Item 2

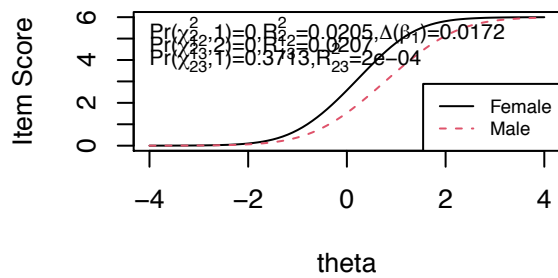

### Differences in Item True Score Function

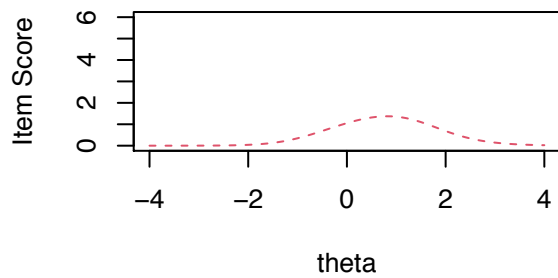

### Item Response Functions

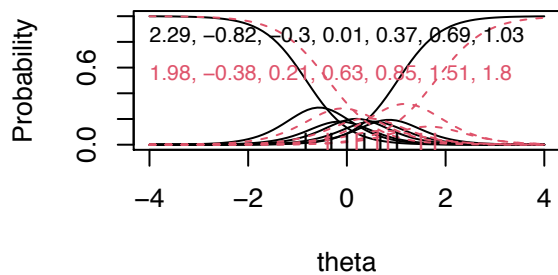

### Impact (Weighted by Density)

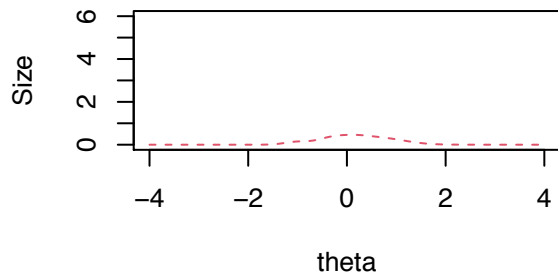

**Item True Score Functions – Item 4**

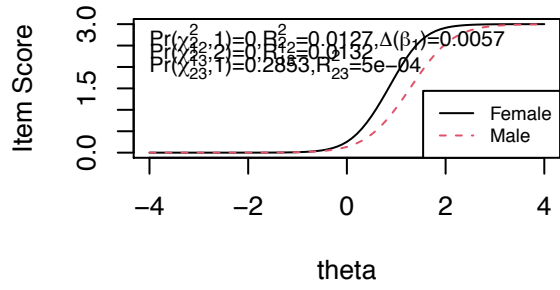

**Differences in Item True Score Function**

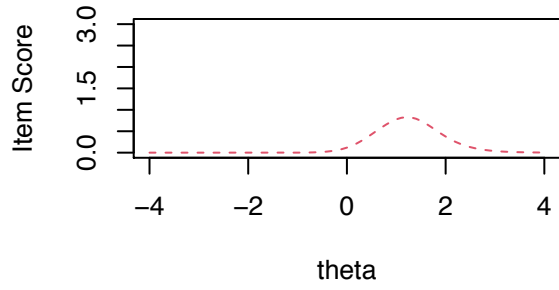

**Item Response Functions**

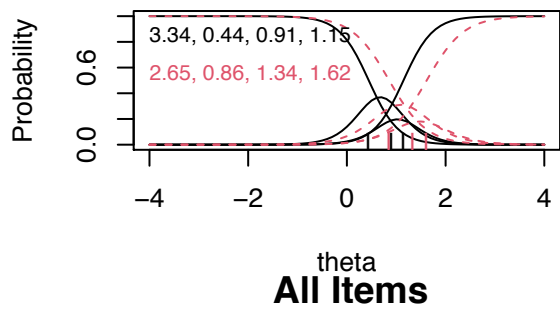

**Impact (Weighted by Density)**

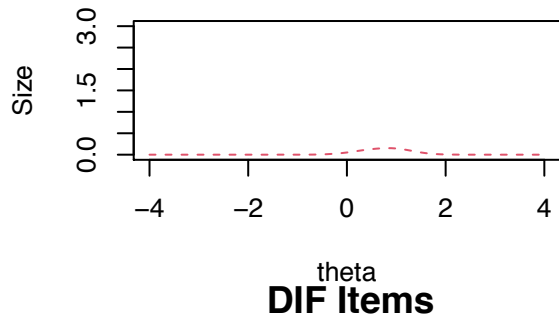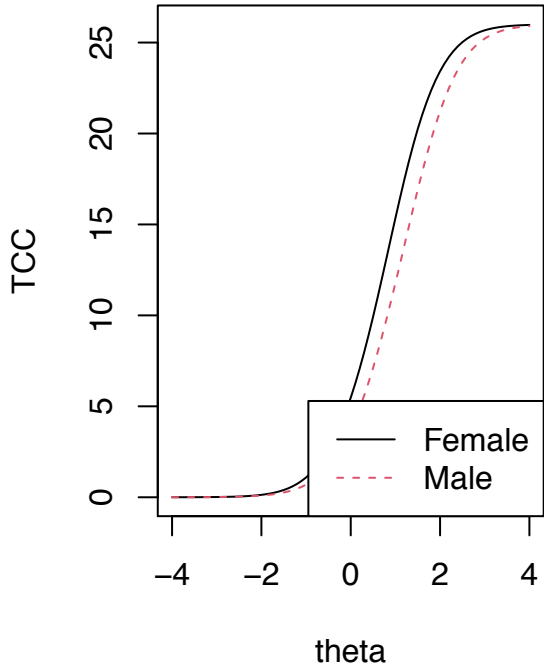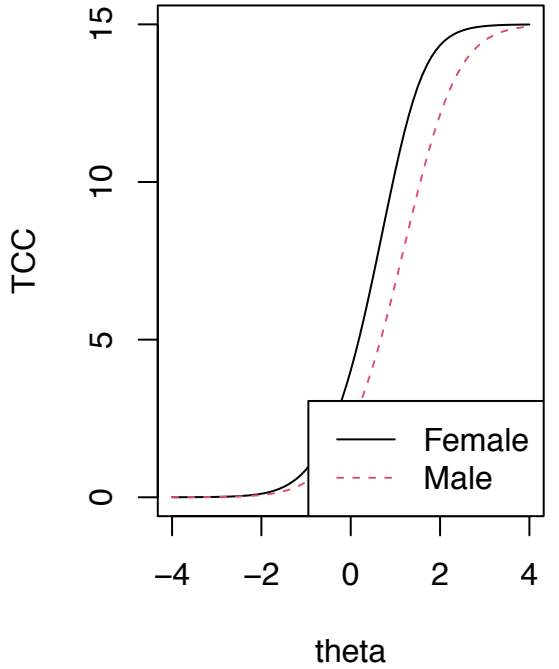

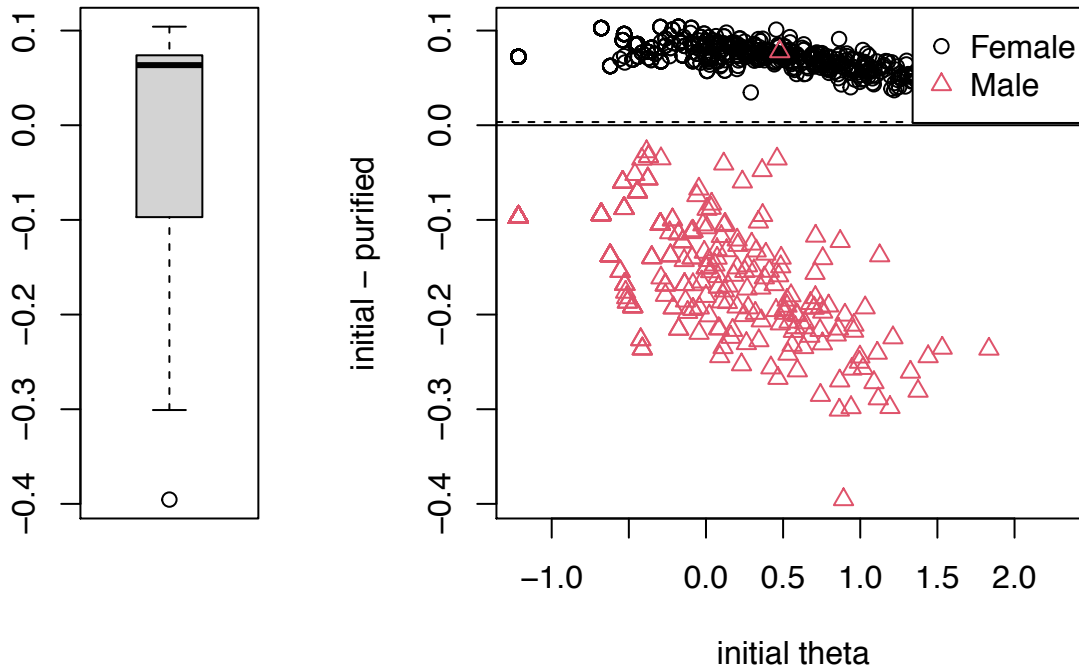

### Age-based DIF: Eating Problems

```
## Call:
## lordif::lordif(resp.data = as.data.frame(age.data), group = age)
##
## Number of DIF groups: 2
##
## Number of items flagged for DIF: 0 of 5
##
## Items flagged:
##
## Number of iterations for purification: 1 of 10
##
## Detection criterion: Chisqr
##
## Threshold: alpha = 0.01
```

Back to top

### Sad Affect

#### Site 1

#### Reliability: Sad Affect

```
## Cronbach's alpha is 0.837.
## Mean item-total correlation is 0.639.
## If each item were dropped:
##      raw_alpha std.alpha G6(smc) average_r S/N alpha se var.r med.r
## Q42      0.75      0.76      0.61      0.61 3.1  0.020  NA  0.61
## Q102     0.87      0.87      0.76      0.76 6.4  0.011  NA  0.76
```

```
## Q100      0.70      0.71      0.55      0.55 2.4      0.024      NA      0.55
```

### Scree Plot

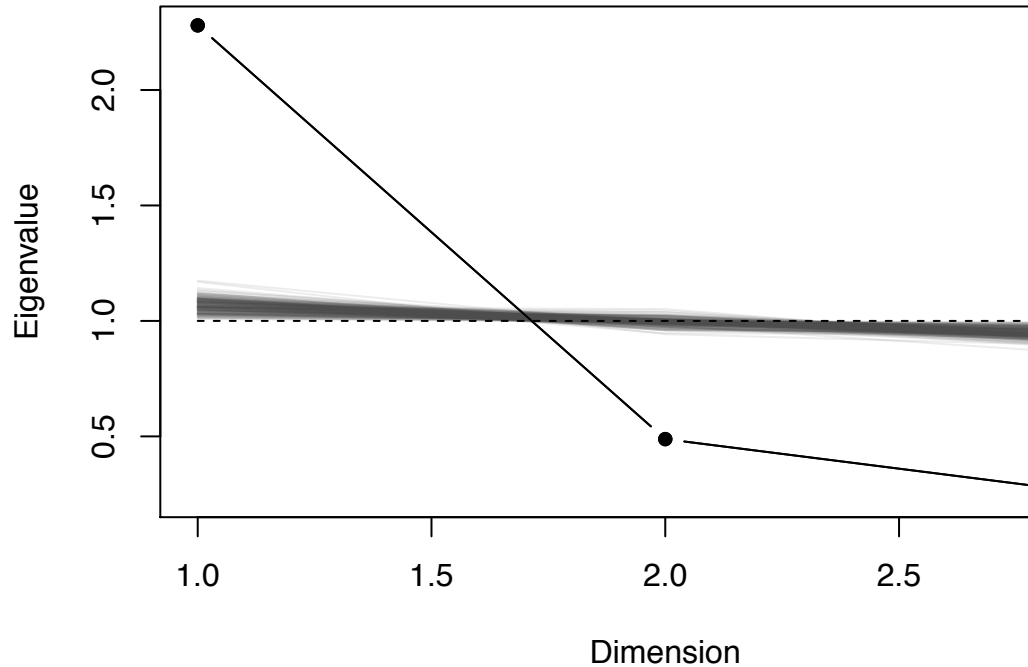

### Unidimensionality: Sad Affect

```
## [1] "Ratio of first to second eigenvalues: 4.67"
```

```
## [1] 2.2798353 0.4881968 0.2319679
```

```
## Factor Analysis using method = minres
```

```
## Call: fa(r = grm_obj$X)
```

```
## Standardized loadings (pattern matrix) based upon correlation matrix
```

```
##      MR1  h2  u2 com
```

```
## Q42  0.83 0.68 0.32  1
```

```
## Q102 0.66 0.43 0.57  1
```

```
## Q100 0.92 0.85 0.15  1
```

```
##
```

```
##      MR1
```

```
## SS loadings  1.97
```

```
## Proportion Var 0.66
```

```
##
```

```
## Mean item complexity = 1
```

```
## Test of the hypothesis that 1 factor is sufficient.
```

```
##
```

```
## The degrees of freedom for the null model are 3 and the objective function was 1.35 with Chi Square
```

```
## The degrees of freedom for the model are 0 and the objective function was 0
```

```
##
```

```
## The root mean square of the residuals (RMSR) is 0
```

```
## The df corrected root mean square of the residuals is NA
```

```
##
```

```
## The harmonic number of observations is 598 with the empirical chi square 0 with prob < NA
```

```
## The total number of observations was 617 with Likelihood Chi Square = 0 with prob < NA
```

```
##
```



```

## Tucker Lewis Index of factoring reliability = -Inf
## Fit based upon off diagonal values = 1
## Measures of factor score adequacy
##
## Correlation of (regression) scores with factors    MR1    0.95
## Multiple R square of scores with factors          0.90
## Minimum correlation of possible factor scores      0.79

```

**Graded-Response Model: Sad Affect**

|         | Extrmt1 | Extrmt2 | Extrmt3 | Extrmt4 | Extrmt5 | Extrmt6 | Dscrmm |
|---------|---------|---------|---------|---------|---------|---------|--------|
| ## Q42  | -1.823  | -1.087  | -0.646  | -0.112  | 0.390   | 0.896   | 3.013  |
| ## Q102 | -1.007  | -0.388  | -0.009  | 0.465   | 1.077   | 1.782   | 1.722  |
| ## Q100 | -1.707  | -1.041  | -0.557  | -0.013  | 0.462   | 1.011   | 4.146  |

**Test Information Function**

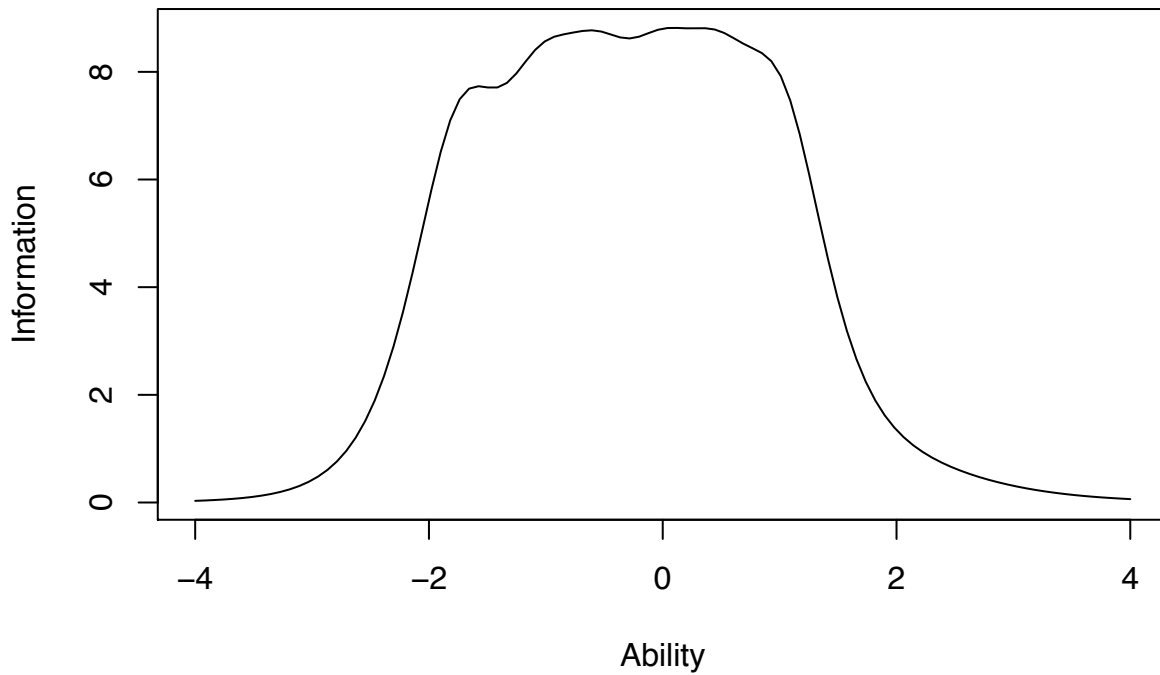

## Item Information Curves

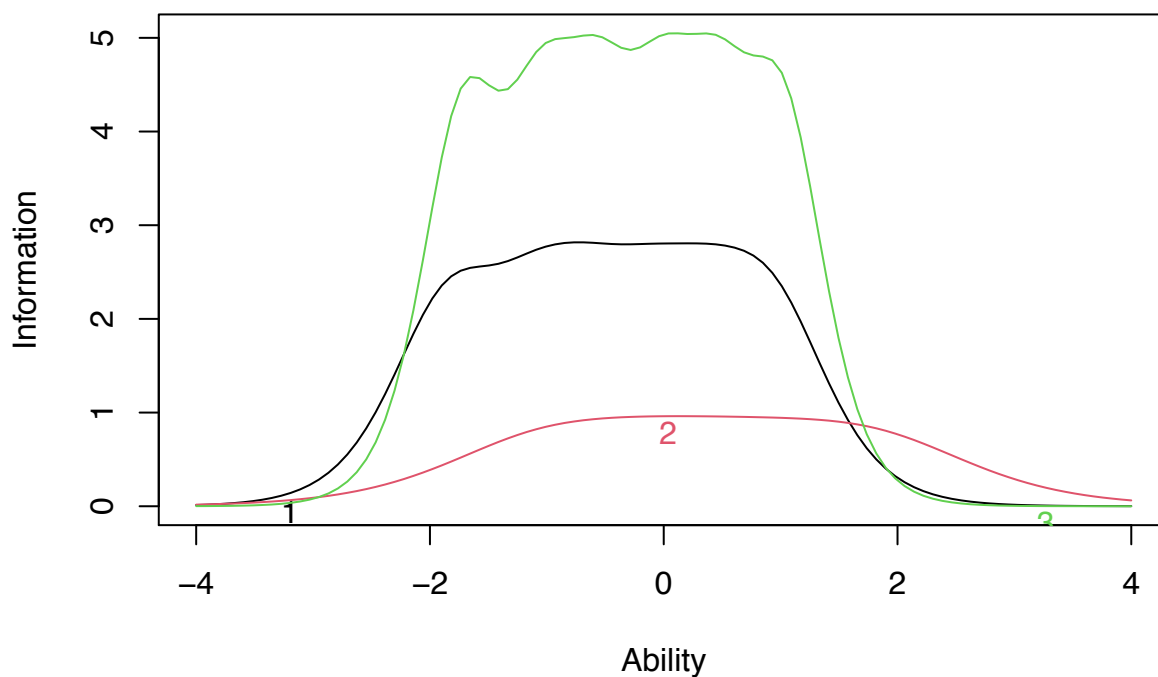

Back to top

### Site 2

#### Reliability: Sad Affect

## Cronbach's alpha is 0.838.

## Mean item-total correlation is 0.638.

## If each item were dropped:

| ##      | raw_alpha | std.alpha | G6(smc) | average_r | S/N | alpha se | var.r | med.r |
|---------|-----------|-----------|---------|-----------|-----|----------|-------|-------|
| ## Q42  | 0.74      | 0.75      | 0.59    | 0.59      | 2.9 | 0.021    | NA    | 0.59  |
| ## Q102 | 0.86      | 0.86      | 0.76    | 0.76      | 6.3 | 0.011    | NA    | 0.76  |
| ## Q100 | 0.72      | 0.72      | 0.56    | 0.56      | 2.5 | 0.023    | NA    | 0.56  |

## Scree Plot

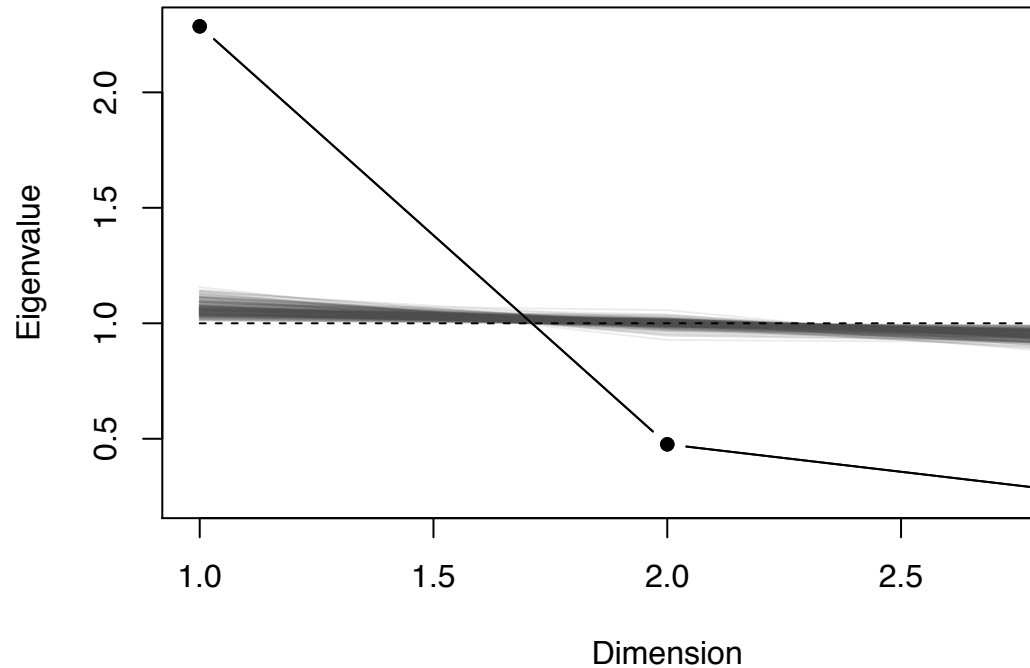

### Unidimensionality: Sad Affect

```
## [1] "Ratio of first to second eigenvalues: 4.801"
## [1] 2.2857213 0.4760639 0.2382148
## Factor Analysis using method = minres
## Call: fa(r = grm_obj$X)
## Standardized loadings (pattern matrix) based upon correlation matrix
##      MR1  h2  u2 com
## Q42  0.85 0.72 0.28  1
## Q102 0.67 0.44 0.56  1
## Q100 0.90 0.80 0.20  1
##
##              MR1
## SS loadings  1.97
## Proportion Var 0.66
##
## Mean item complexity = 1
## Test of the hypothesis that 1 factor is sufficient.
##
## The degrees of freedom for the null model are 3 and the objective function was 1.35 with Chi Square
## The degrees of freedom for the model are 0 and the objective function was 0
##
## The root mean square of the residuals (RMSR) is 0
## The df corrected root mean square of the residuals is NA
##
## The harmonic number of observations is 575 with the empirical chi square 0 with prob < NA
## The total number of observations was 596 with Likelihood Chi Square = 0 with prob < NA
##
## Tucker Lewis Index of factoring reliability = -Inf
## Fit based upon off diagonal values = 1
## Measures of factor score adequacy
```

```
##                                     MR1
## Correlation of (regression) scores with factors 0.94
## Multiple R square of scores with factors 0.88
## Minimum correlation of possible factor scores 0.76
```

**Graded-Response Model: Sad Affect**

```
##      Extrmt1 Extrmt2 Extrmt3 Extrmt4 Extrmt5 Extrmt6 Dscrmm
## Q42  -1.344  -0.626  -0.233  0.234  0.665  1.073  3.479
## Q102 -0.447  0.055  0.492  0.914  1.416  1.951  1.923
## Q100 -1.301  -0.657  -0.104  0.390  0.885  1.447  3.952
```

**Test Information Function**

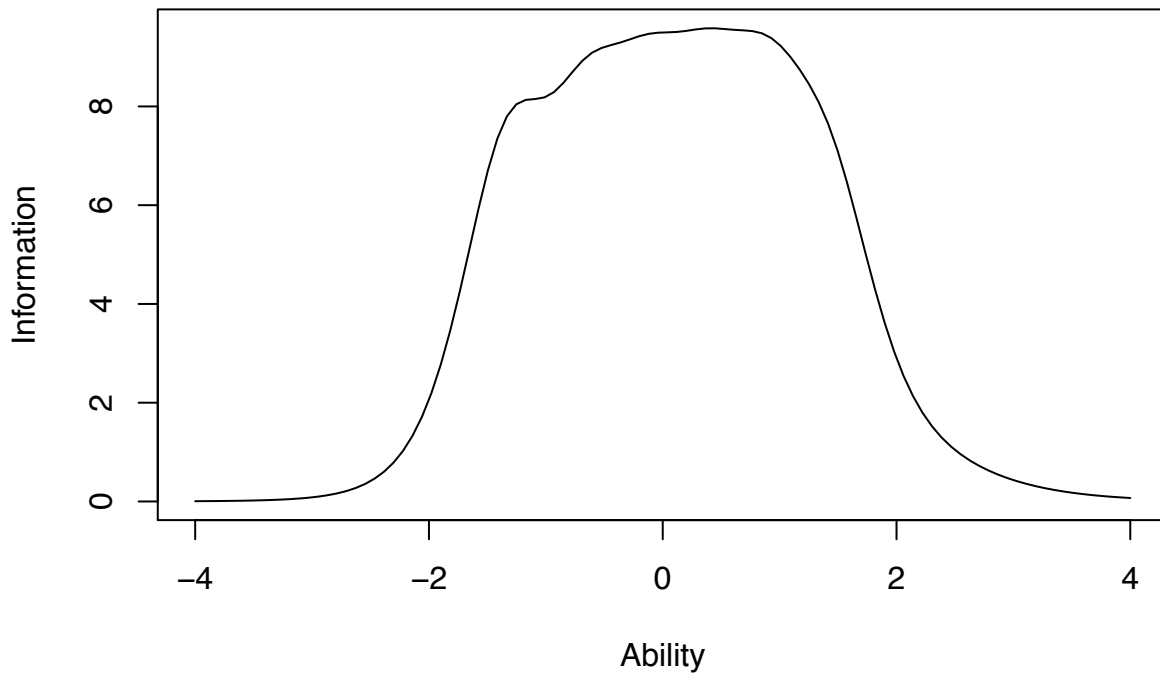

## Item Information Curves

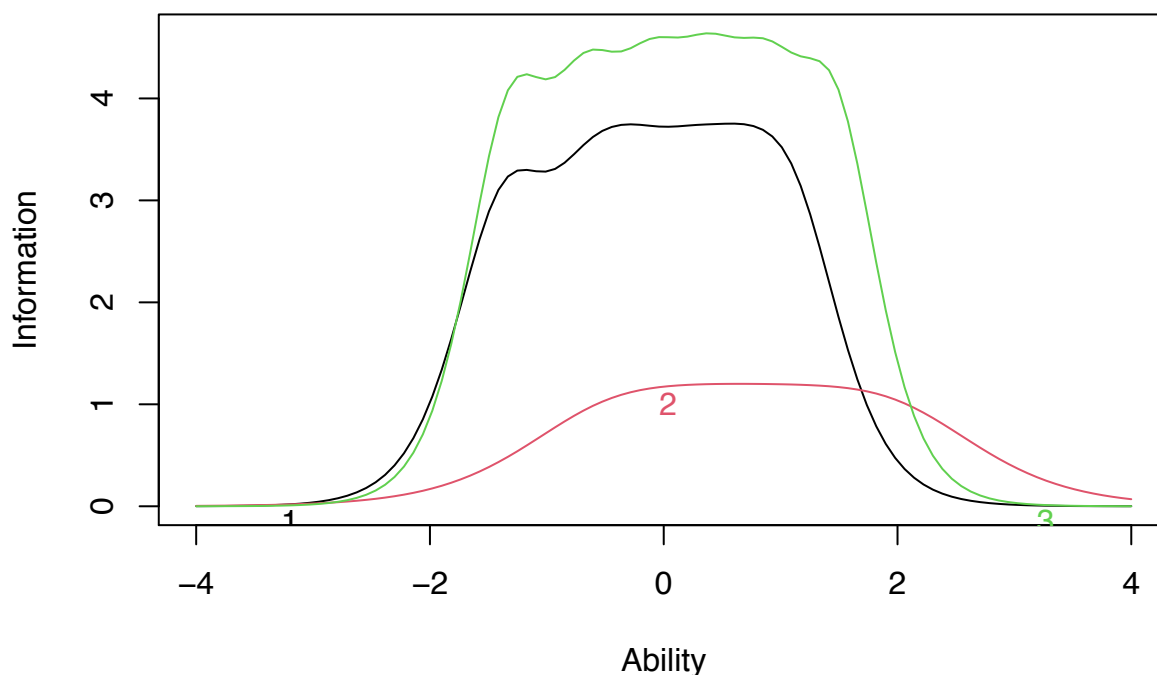

Back to top

### Gender-based DIF: Sad Affect

## No Gender-based DIF detected

### Age-based DIF: Sad Affect

## No age-based DIF detected

Back to top

## Somatic Anxiety

### Site 1

#### Reliability: Somatic Anxiety

## Cronbach's alpha is 0.803.

## Mean item-total correlation is 0.456.

## If each item were dropped:

| ##      | raw_alpha | std.alpha | G6(smc) | average_r | S/N | alpha se | var.r  | med.r |
|---------|-----------|-----------|---------|-----------|-----|----------|--------|-------|
| ## Q51  | 0.76      | 0.76      | 0.71    | 0.44      | 3.2 | 0.016    | 0.0045 | 0.45  |
| ## Q103 | 0.78      | 0.78      | 0.73    | 0.47      | 3.6 | 0.015    | 0.0026 | 0.47  |
| ## Q75  | 0.76      | 0.76      | 0.71    | 0.44      | 3.2 | 0.016    | 0.0036 | 0.44  |
| ## Q3   | 0.78      | 0.78      | 0.73    | 0.47      | 3.6 | 0.015    | 0.0017 | 0.48  |
| ## Q53  | 0.76      | 0.76      | 0.71    | 0.45      | 3.2 | 0.016    | 0.0041 | 0.46  |

## Scree Plot

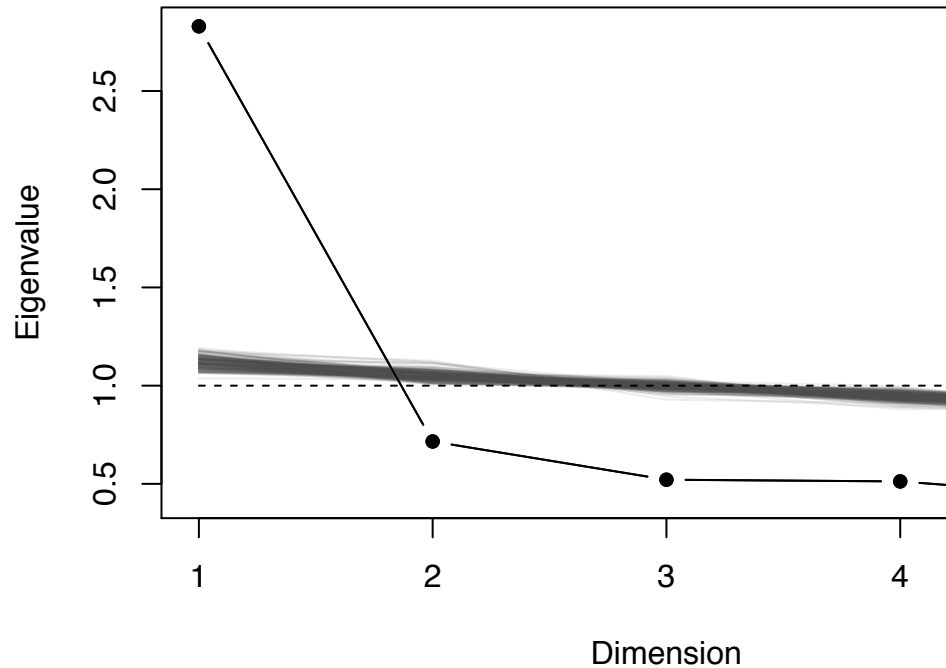

### Unidimensionality: Somatic Anxiety

```
## [1] "Ratio of first to second eigenvalues: 3.953"
## [1] 2.8291224 0.7157431 0.5210768 0.5123736 0.4216841
## Factor Analysis using method = minres
## Call: fa(r = grm_obj$X)
## Standardized loadings (pattern matrix) based upon correlation matrix
##      MR1  h2  u2 com
## Q51  0.71 0.50 0.50  1
## Q103 0.64 0.40 0.60  1
## Q75  0.72 0.51 0.49  1
## Q3   0.63 0.39 0.61  1
## Q53  0.69 0.48 0.52  1
##
##              MR1
## SS loadings  2.29
## Proportion Var 0.46
##
## Mean item complexity = 1
## Test of the hypothesis that 1 factor is sufficient.
##
## The degrees of freedom for the null model are 10 and the objective function was 1.48 with Chi Square
## The degrees of freedom for the model are 5 and the objective function was 0.06
##
## The root mean square of the residuals (RMSR) is 0.04
## The df corrected root mean square of the residuals is 0.06
##
## The harmonic number of observations is 595 with the empirical chi square 22.37 with prob < 0.000
## The total number of observations was 617 with Likelihood Chi Square = 37.38 with prob < 5e-07
##
## Tucker Lewis Index of factoring reliability = 0.928
```

```

## RMSEA index = 0.102 and the 90 % confidence intervals are 0.073 0.134
## BIC = 5.25
## Fit based upon off diagonal values = 0.99
## Measures of factor score adequacy
##
## Correlation of (regression) scores with factors MR1 0.90
## Multiple R square of scores with factors 0.81
## Minimum correlation of possible factor scores 0.62

```

**Graded-Response Model: Somatic Anxiety**

| ##      | Extrmt1 | Extrmt2 | Extrmt3 | Extrmt4 | Extrmt5 | Extrmt6 | Dscrmn |
|---------|---------|---------|---------|---------|---------|---------|--------|
| ## Q51  | -2.462  | -1.833  | -1.241  | -0.739  | -0.029  | 0.714   | 2.072  |
| ## Q103 | -0.751  | -0.048  | 0.507   | 1.045   | 1.609   | 2.268   | 1.753  |
| ## Q75  | -1.581  | -1.031  | -0.618  | -0.198  | 0.385   | 1.008   | 2.069  |
| ## Q3   | -1.160  | -0.682  | -0.248  | 0.226   | 0.774   | 1.345   | 1.495  |
| ## Q53  | -1.063  | -0.470  | -0.104  | 0.316   | 0.828   | 1.448   | 1.785  |

**Test Information Function**

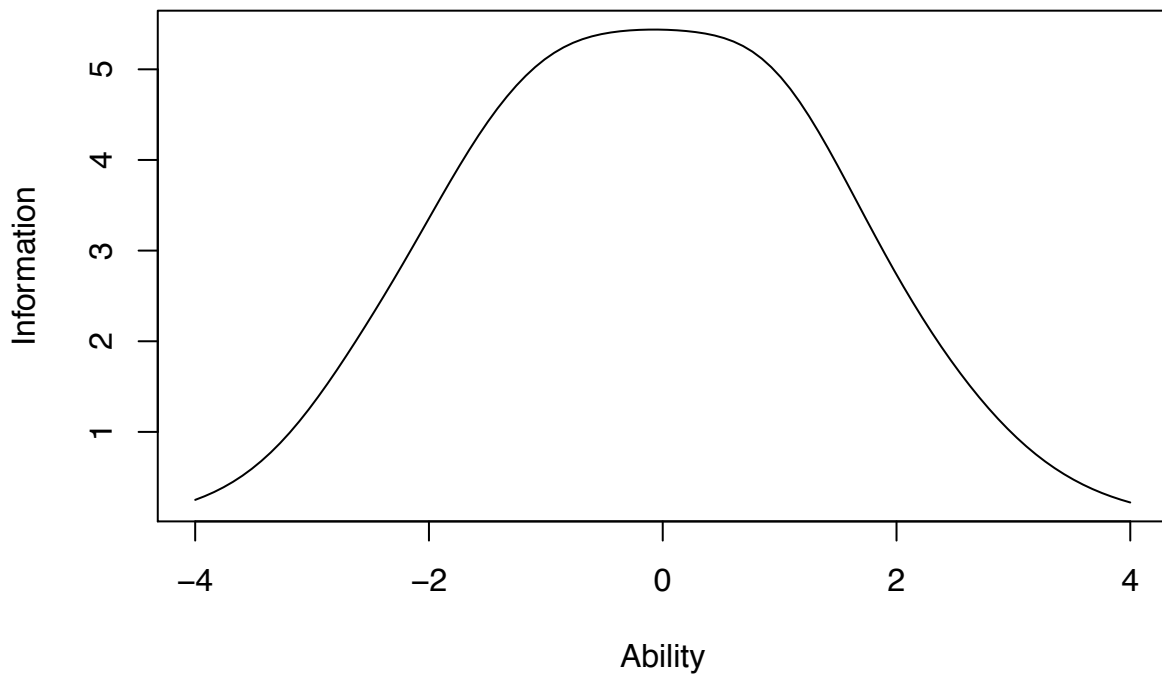

## Item Information Curves

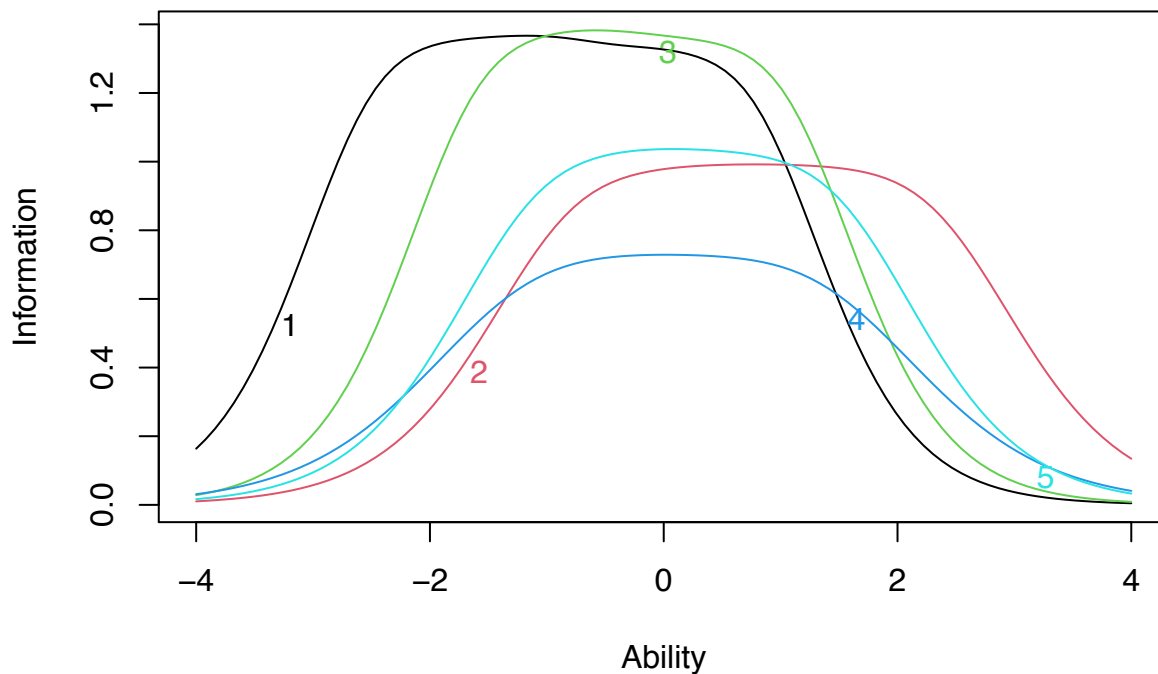

Back to top

### Site 2

#### Reliability: Somatic Anxiety

## Cronbach's alpha is 0.808.

## Mean item-total correlation is 0.459.

## If each item were dropped:

| ##      | raw_alpha | std.alpha | G6(smc) | average_r | S/N | alpha se | var.r  | med.r |
|---------|-----------|-----------|---------|-----------|-----|----------|--------|-------|
| ## Q51  | 0.77      | 0.77      | 0.73    | 0.45      | 3.3 | 0.015    | 0.0068 | 0.47  |
| ## Q103 | 0.79      | 0.79      | 0.75    | 0.48      | 3.7 | 0.014    | 0.0060 | 0.49  |
| ## Q75  | 0.75      | 0.76      | 0.71    | 0.44      | 3.1 | 0.016    | 0.0055 | 0.45  |
| ## Q3   | 0.79      | 0.79      | 0.75    | 0.49      | 3.9 | 0.014    | 0.0023 | 0.48  |
| ## Q53  | 0.75      | 0.75      | 0.71    | 0.44      | 3.1 | 0.017    | 0.0078 | 0.42  |



## Scree Plot

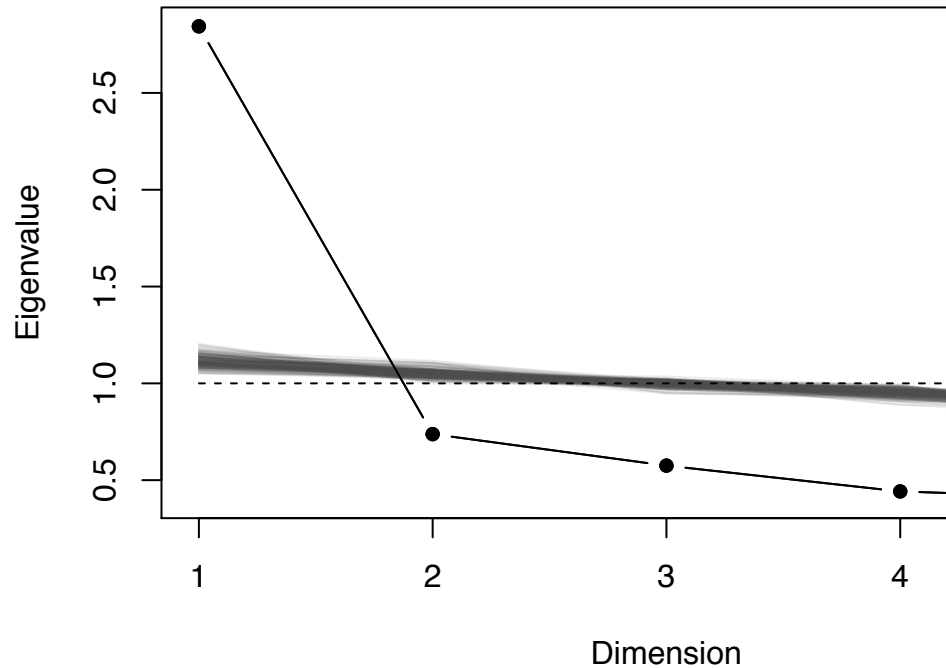

### Unidimensionality: Somatic Anxiety

```
## [1] "Ratio of first to second eigenvalues: 3.855"
## [1] 2.8439146 0.7377162 0.5750519 0.4418454 0.4014719
## Factor Analysis using method = minres
## Call: fa(r = grm_obj$X)
## Standardized loadings (pattern matrix) based upon correlation matrix
##      MR1  h2  u2 com
## Q51  0.69 0.48 0.52  1
## Q103 0.62 0.38 0.62  1
## Q75  0.75 0.56 0.44  1
## Q3   0.59 0.35 0.65  1
## Q53  0.74 0.55 0.45  1
##
##              MR1
## SS loadings  2.32
## Proportion Var 0.46
##
## Mean item complexity = 1
## Test of the hypothesis that 1 factor is sufficient.
##
## The degrees of freedom for the null model are 10 and the objective function was 1.54 with Chi Square
## The degrees of freedom for the model are 5 and the objective function was 0.08
##
## The root mean square of the residuals (RMSR) is 0.05
## The df corrected root mean square of the residuals is 0.07
##
## The harmonic number of observations is 578 with the empirical chi square 26.46 with prob < 7.3e-
## The total number of observations was 596 with Likelihood Chi Square = 46.14 with prob < 8.5e-09
##
## Tucker Lewis Index of factoring reliability = 0.909
```

```

## RMSEA index = 0.117 and the 90 % confidence intervals are 0.088 0.15
## BIC = 14.18
## Fit based upon off diagonal values = 0.99
## Measures of factor score adequacy
##
## Correlation of (regression) scores with factors MR1 0.91
## Multiple R square of scores with factors 0.82
## Minimum correlation of possible factor scores 0.64

```

**Graded-Response Model: Somatic Anxiety**

| ##      | Extrmt1 | Extrmt2 | Extrmt3 | Extrmt4 | Extrmt5 | Extrmt6 | Dscrmm |
|---------|---------|---------|---------|---------|---------|---------|--------|
| ## Q51  | -2.291  | -1.404  | -0.796  | -0.187  | 0.415   | 0.961   | 1.924  |
| ## Q103 | -0.551  | 0.138   | 0.644   | 1.191   | 1.592   | 2.323   | 1.696  |
| ## Q75  | -1.313  | -0.704  | -0.307  | 0.164   | 0.642   | 1.157   | 2.341  |
| ## Q3   | -1.028  | -0.394  | 0.199   | 0.615   | 1.274   | 1.862   | 1.364  |
| ## Q53  | -0.869  | -0.338  | 0.119   | 0.506   | 0.922   | 1.453   | 1.998  |

**Test Information Function**

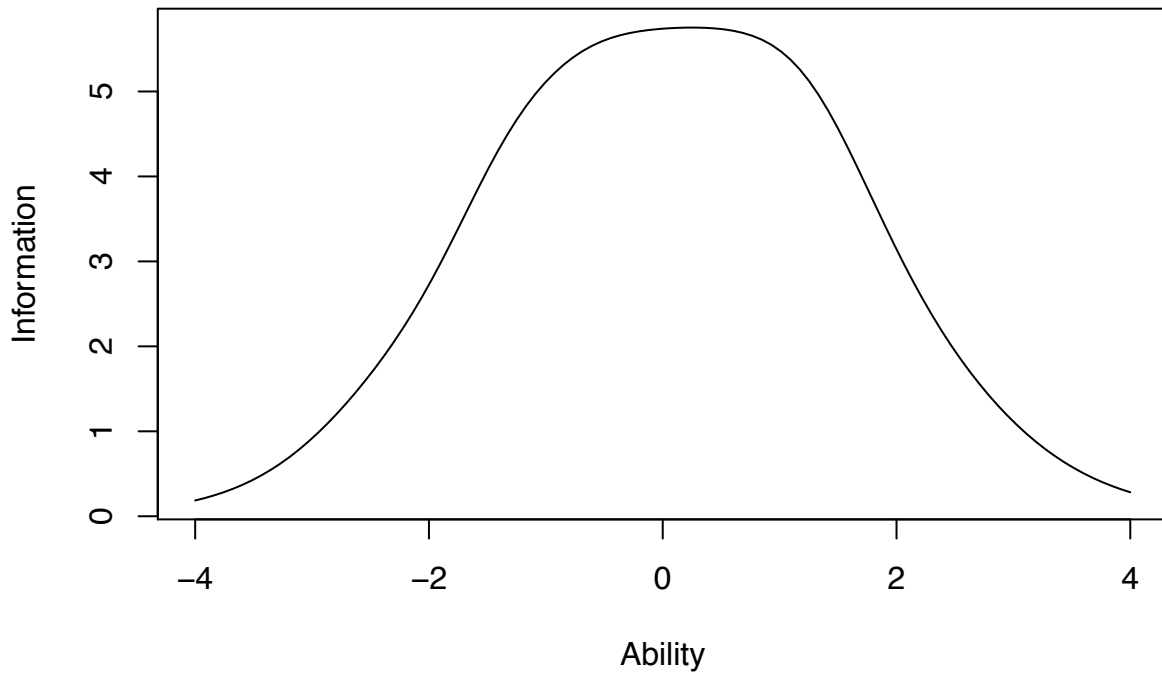

## Item Information Curves

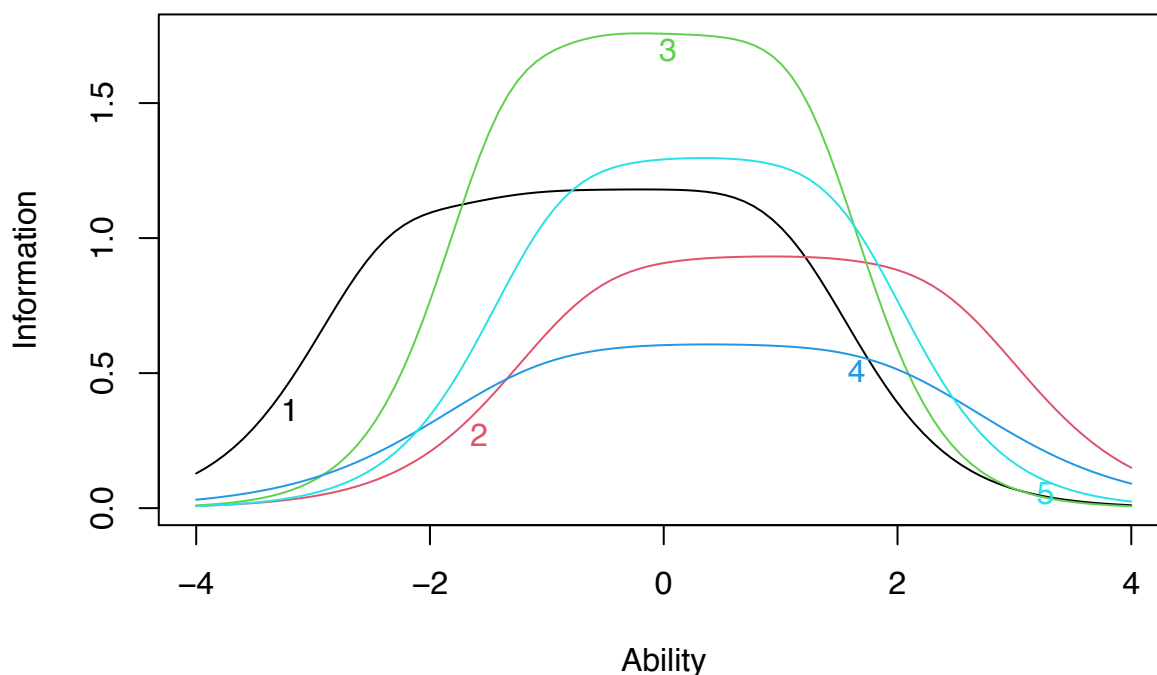

Back to top

### Site DIF

```
## Call:
## lordif::lordif(resp.data = as.data.frame(merged_data), group = site)
##
## Number of DIF groups: 2
##
## Number of items flagged for DIF: 1 of 5
##
## Items flagged: 1
##
## Number of iterations for purification: 2 of 10
##
## Detection criterion: Chisqr
##
## Threshold: alpha = 0.01
##
## item ncat chi12 chi13 chi23
## 1 1 7 0.0001 0.0002 0.2917
## 2 2 7 0.1997 0.3781 0.5837
## 3 3 7 0.1224 0.2884 0.7514
## 4 4 7 0.0725 0.0523 0.1019
## 5 5 7 0.1865 0.3079 0.4345
```

### Trait Distributions

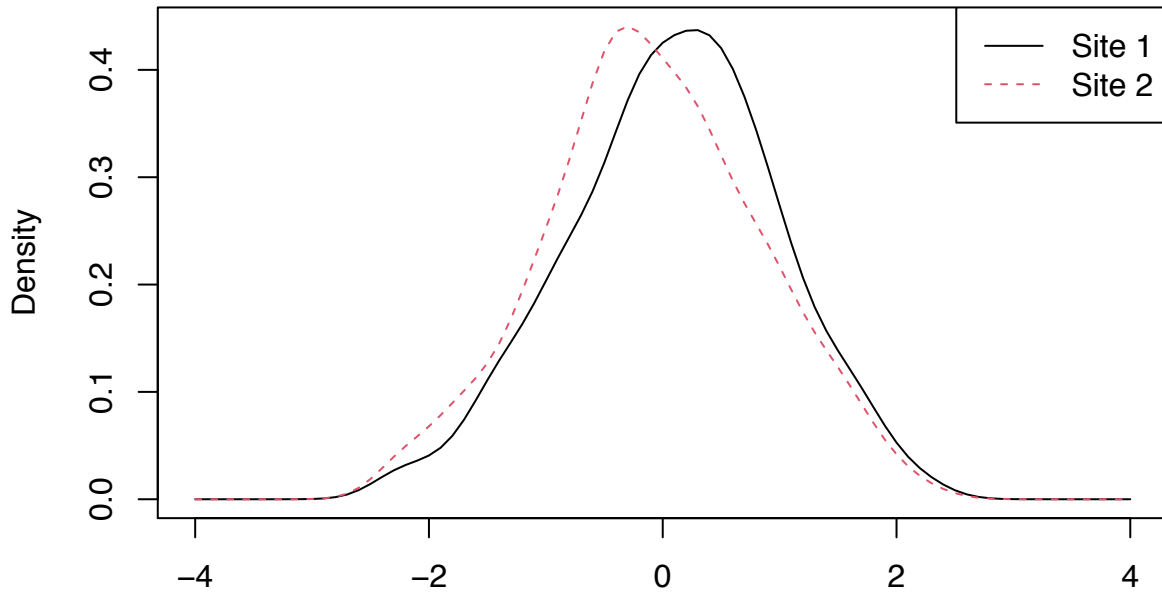

**Item True Score Functions – Item 1**      **Differences in Item True Score Function**

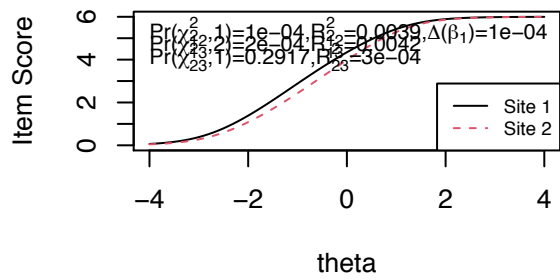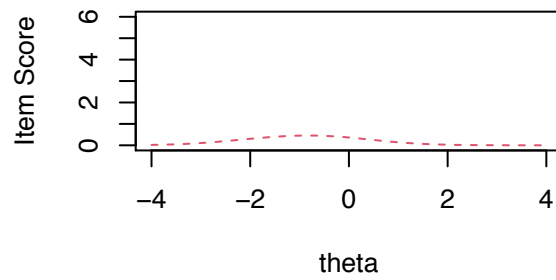

**Item Response Functions**

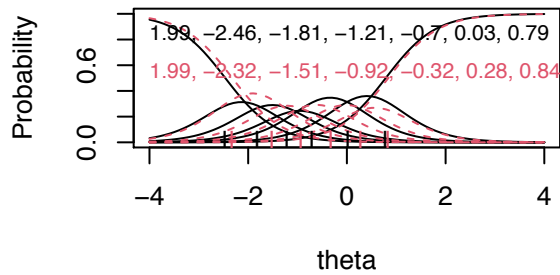

**Impact (Weighted by Density)**

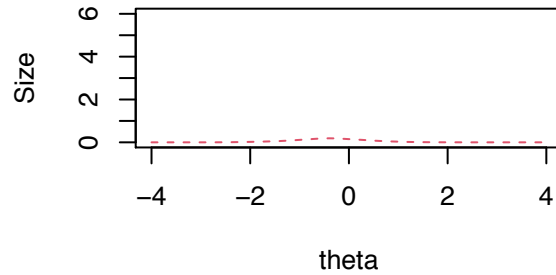

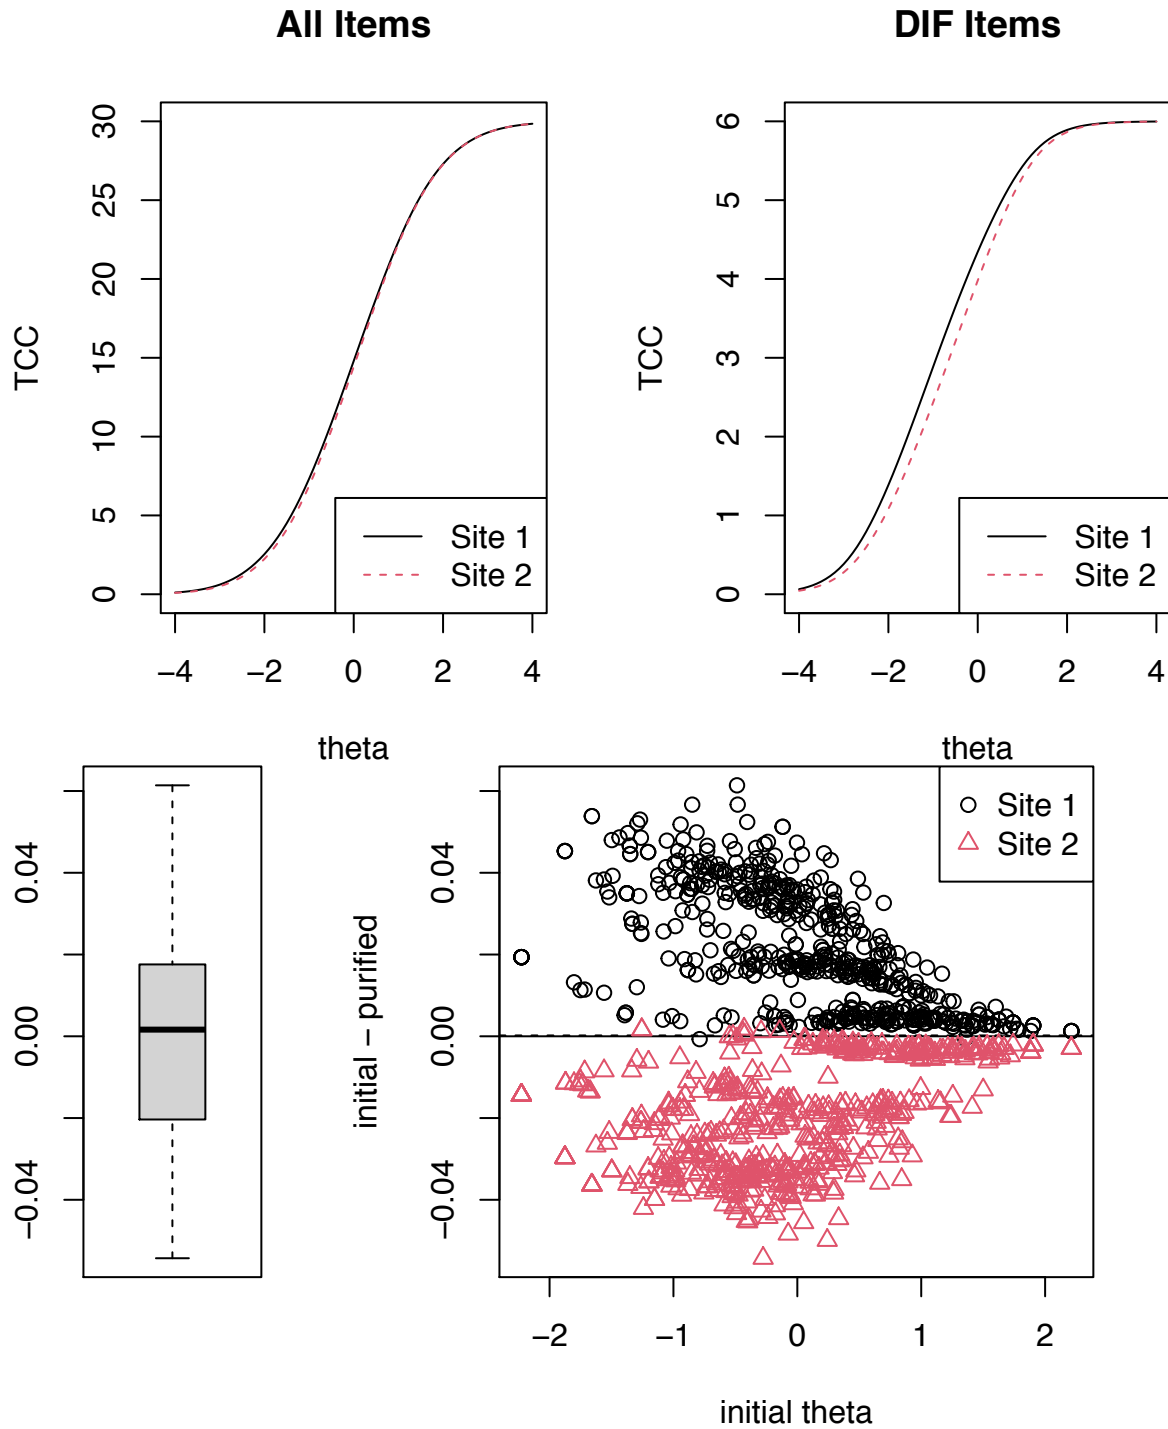

Back to top

### Gender-based DIF: Somatic Anxiety

```
## Call:
## lordif::lordif(resp.data = as.data.frame(sex.data), group = sex)
##
## Number of DIF groups: 2
```

```
##
## Number of items flagged for DIF: 3 of 5
##
## Items flagged: 2, 4, 5
##
## Number of iterations for purification: 3 of 10
##
## Detection criterion: Chisqr
##
## Threshold: alpha = 0.01
##
## item ncat chi12 chi13 chi23
## 1 1 7 0.8733 0.9795 0.8991
## 2 2 7 0.0000 0.0000 0.0454
## 3 3 7 0.1115 0.0413 0.0500
## 4 4 7 0.0000 0.0000 0.0000
## 5 5 7 0.0058 0.0000 0.0000
```

### Trait Distributions

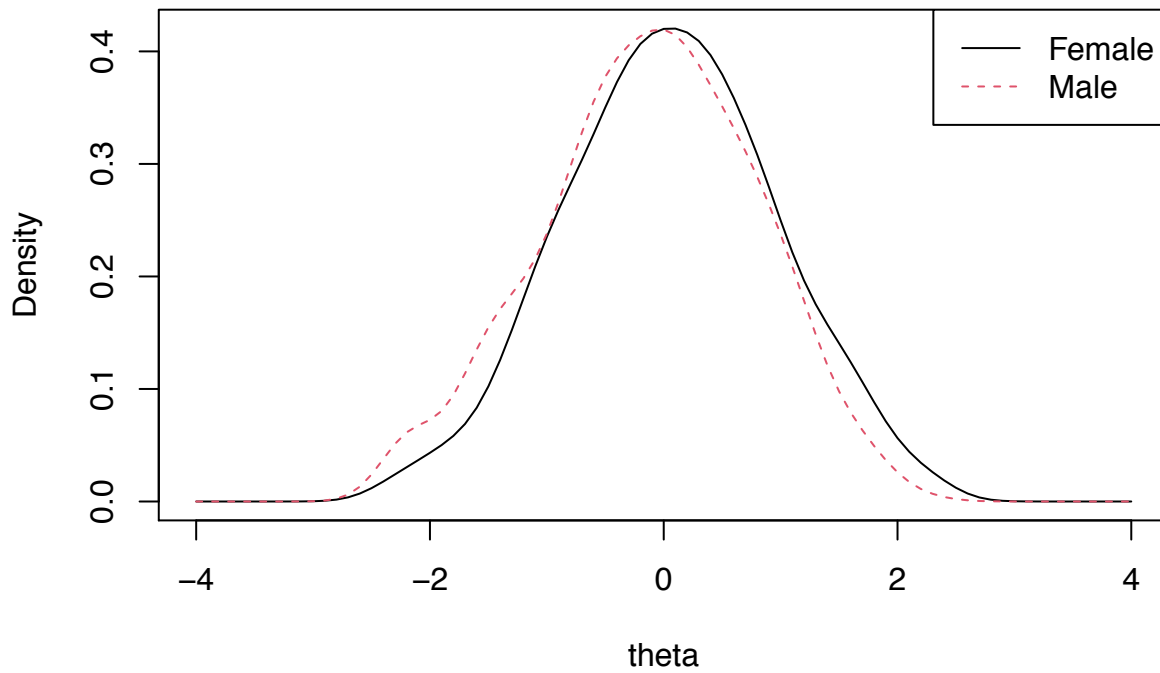

### Item True Score Functions – Item 2

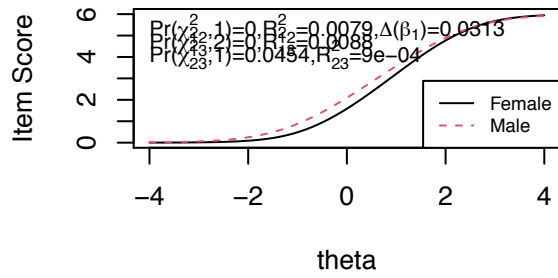

### Differences in Item True Score Function

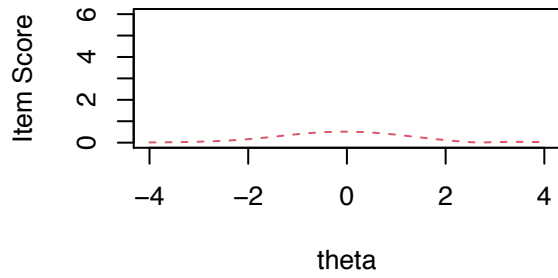

### Item Response Functions

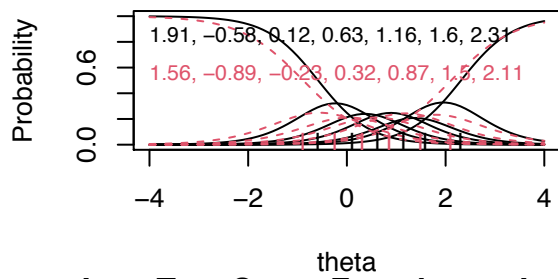

### Impact (Weighted by Density)

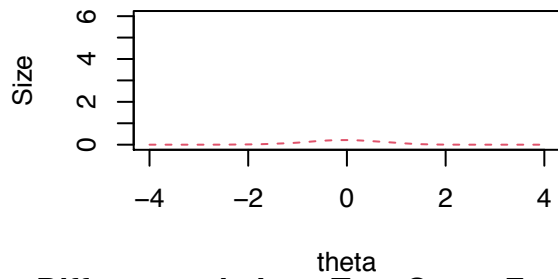

### Item True Score Functions – Item 4

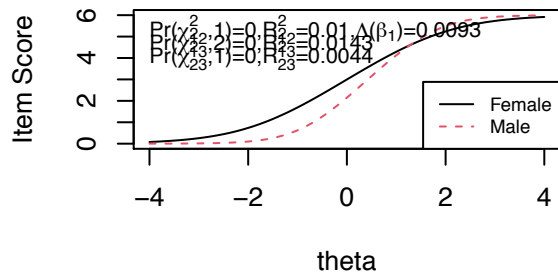

### Differences in Item True Score Function

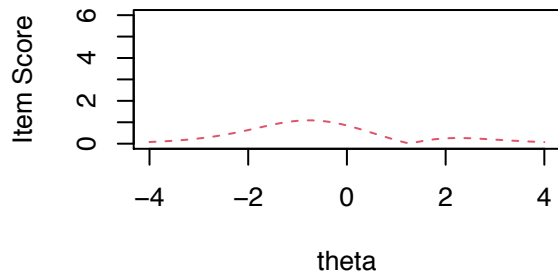

### Item Response Functions

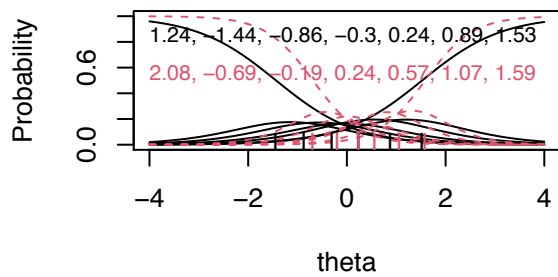

### Impact (Weighted by Density)

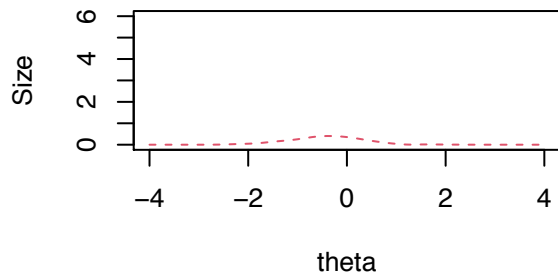

**Item True Score Functions – Item 5**

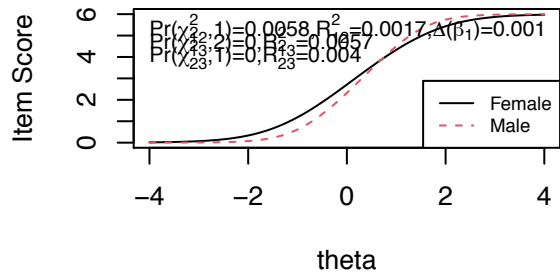

**Differences in Item True Score Function**

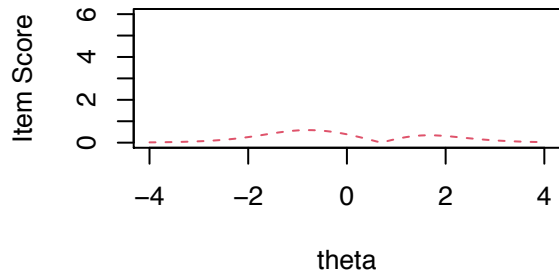

**Item Response Functions**

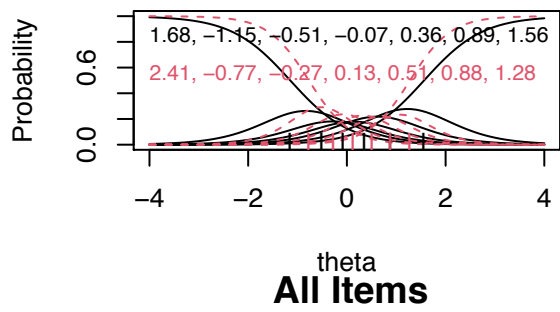

**Impact (Weighted by Density)**

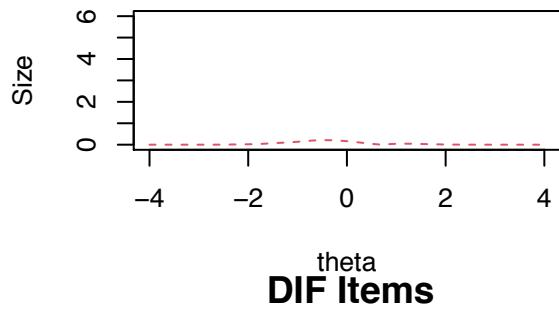

**All Items**

**DIF Items**

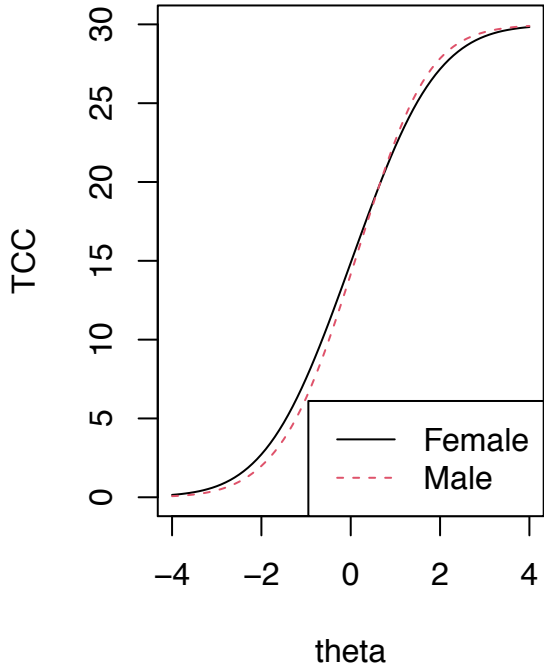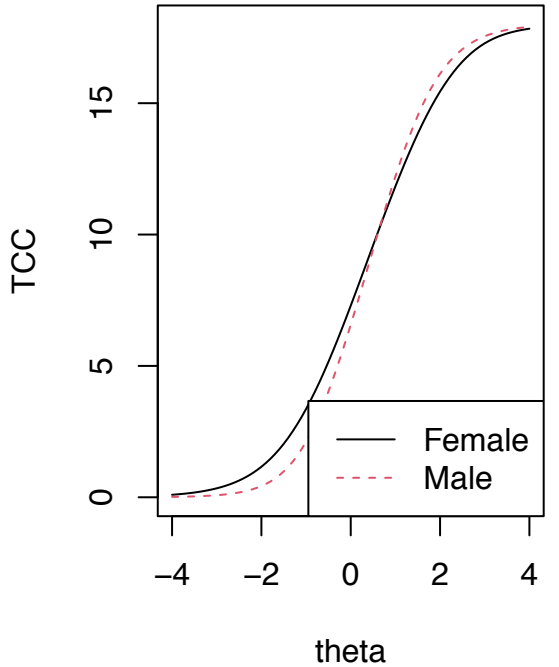



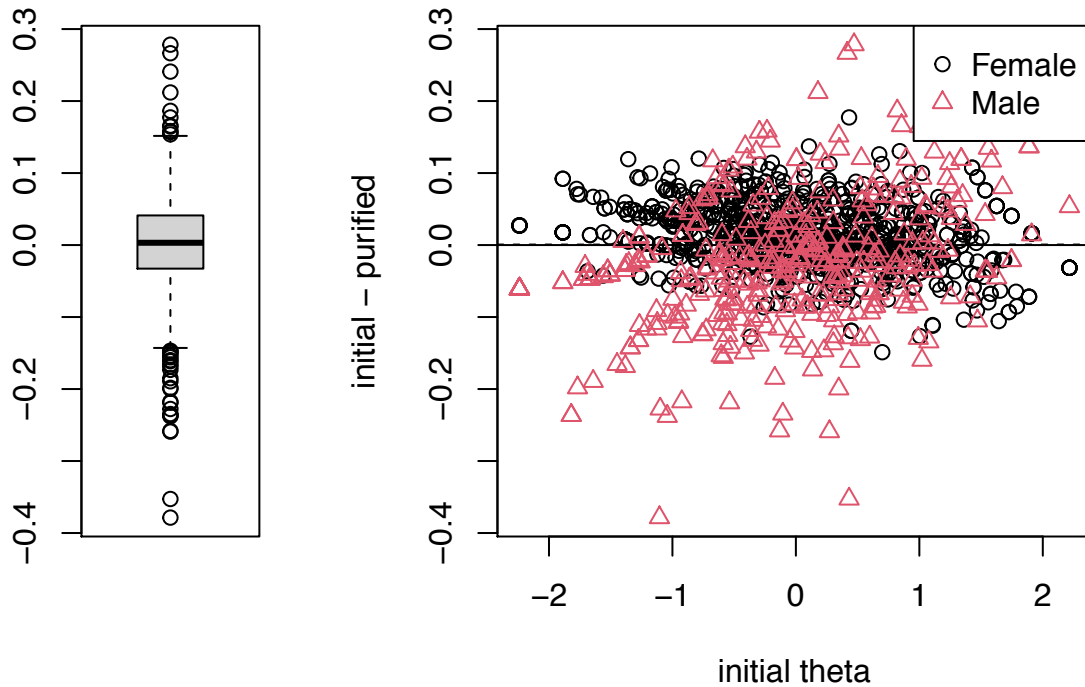

#### Age-based DIF: Somatic Anxiety

```
## Call:
## lordif::lordif(resp.data = as.data.frame(age.data), group = age)
##
##   Number of DIF groups: 2
##
##   Number of items flagged for DIF: 4 of 5
##
##   Items flagged: 1, 3, 4, 5
##
##   Number of iterations for purification: 2 of 10
##
##   Detection criterion: Chisqr
##
##   Threshold: alpha = 0.01
##
##   item ncat  chi12  chi13  chi23
## 1      1      7 0.0066 0.0001 0.0005
## 2      2      7 0.5523 0.7902 0.7315
## 3      3      7 0.0000 0.0000 0.0711
## 4      4      7 0.0001 0.0001 0.0296
## 5      5      7 0.0057 0.0181 0.5346
```

### Trait Distributions

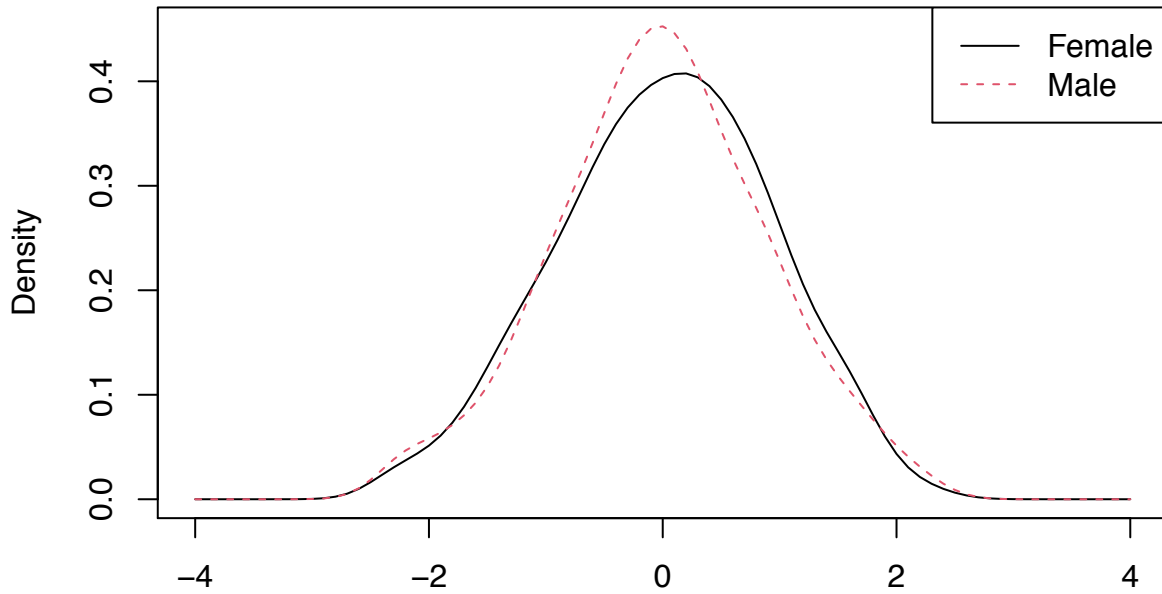

### Item True Score Functions – Item 1      Differences in Item True Score Function

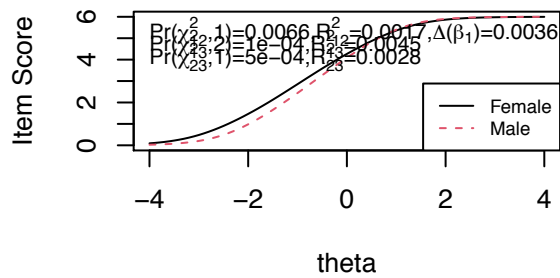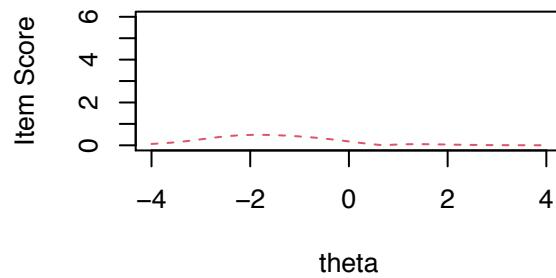

### Item Response Functions

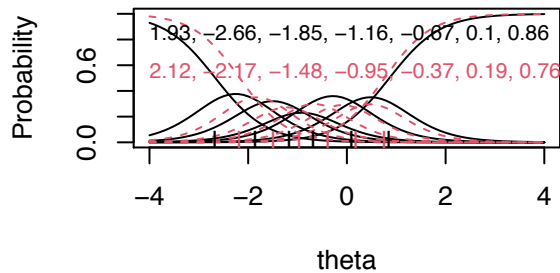

### Impact (Weighted by Density)

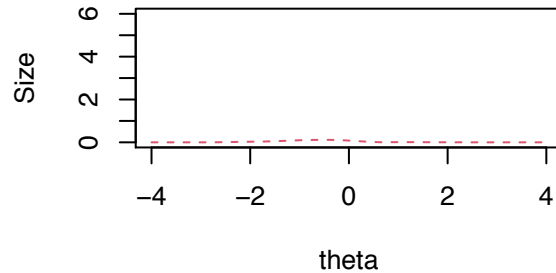

### Item True Score Functions – Item 3

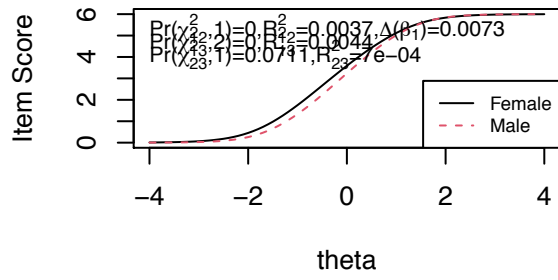

### Differences in Item True Score Function

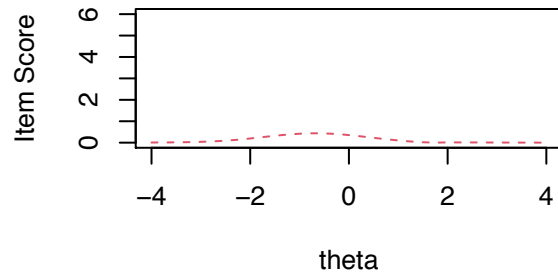

### Item Response Functions

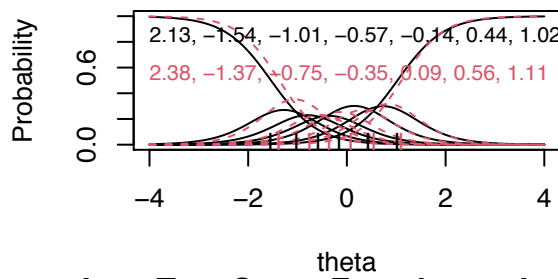

### Impact (Weighted by Density)

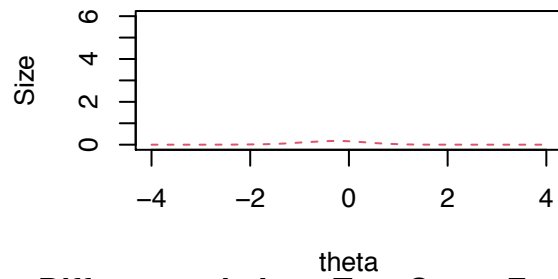

### Item True Score Functions – Item 4

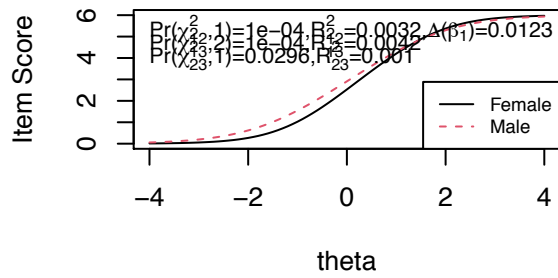

### Differences in Item True Score Function

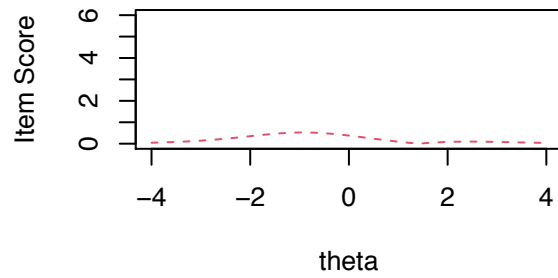

### Item Response Functions

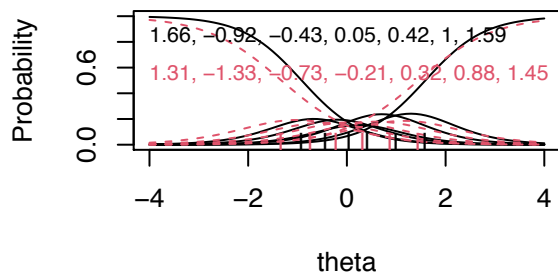

### Impact (Weighted by Density)

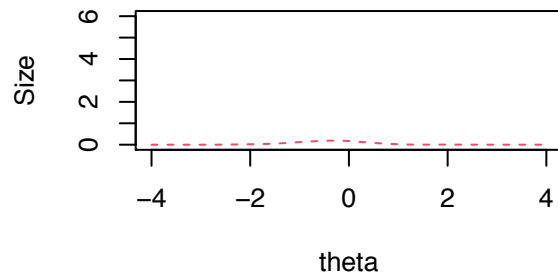

**Item True Score Functions – Item 5**

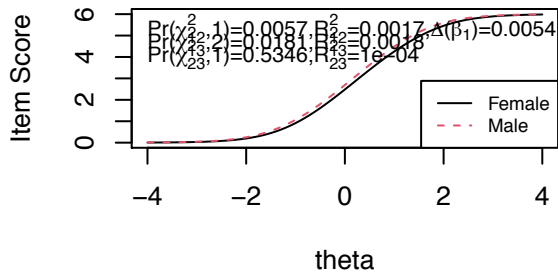

**Differences in Item True Score Function**

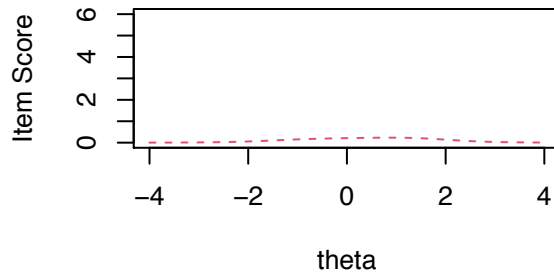

**Item Response Functions**

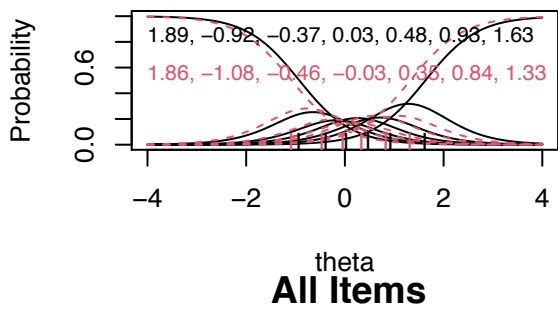

**Impact (Weighted by Density)**

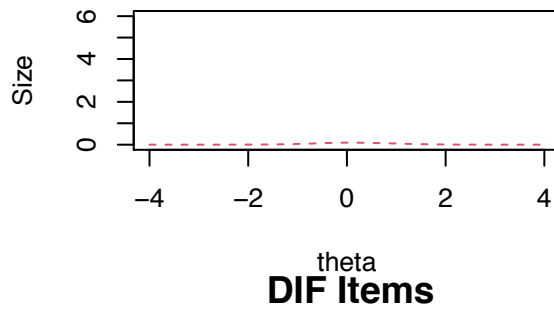

**All Items**

**DIF Items**

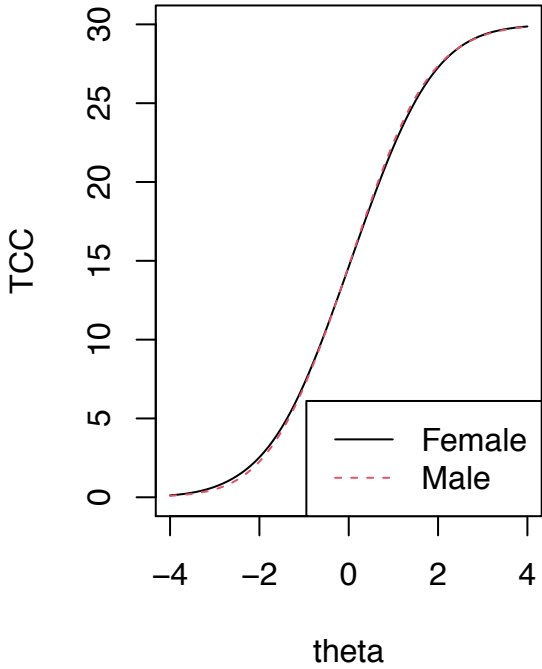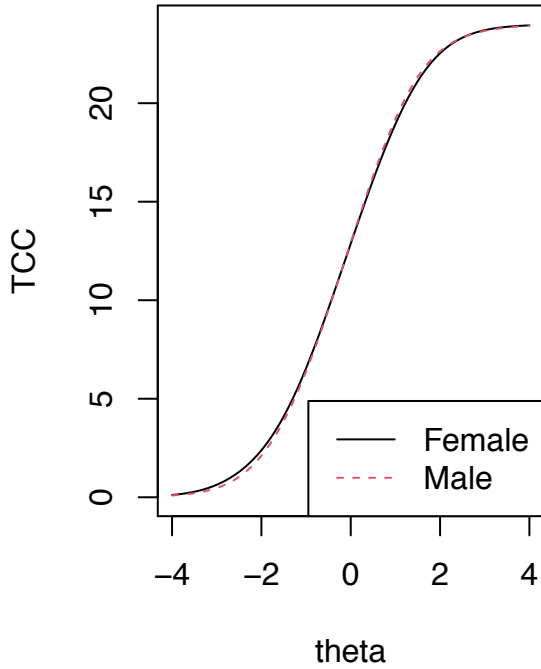

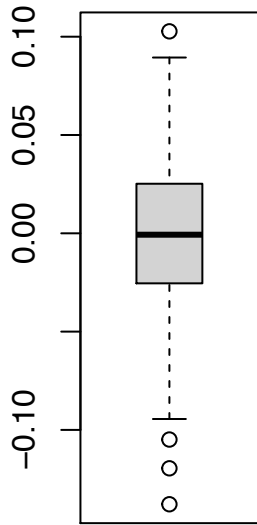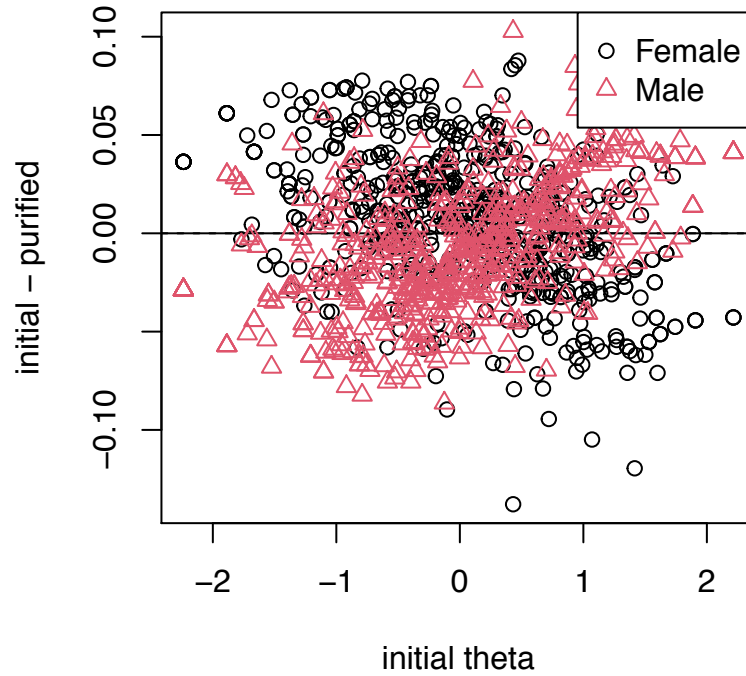

Back to top

## Substance Use

### Site 1

#### Reliability: Substance Use

```
## Cronbach's alpha is 0.845.
## Mean item-total correlation is 0.598.
## If each item were dropped:
##      raw_alpha std.alpha G6(smc) average_r S/N alpha se  var.r med.r
## Q59      0.81      0.81   0.74      0.58 4.2   0.013 0.00049 0.57
## Q4       0.79      0.81   0.74      0.59 4.3   0.013 0.00034 0.59
## Q107     0.80      0.82   0.75      0.60 4.6   0.013 0.00113 0.59
## Q35     0.81      0.83   0.76      0.62 4.8   0.012 0.00043 0.61
```

## Scree Plot

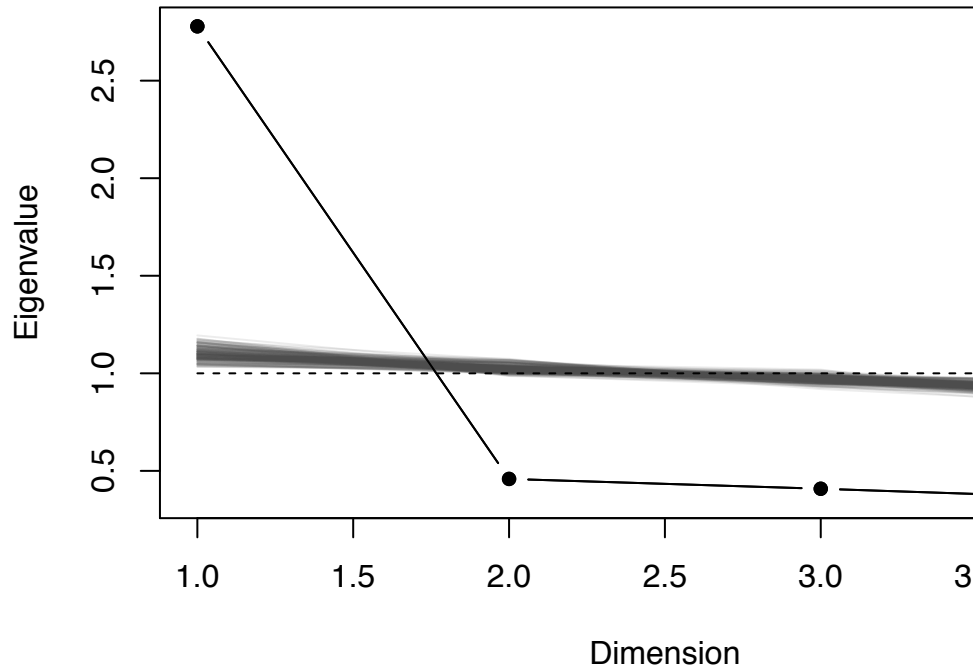

Unidimensionality: Substance Use

```
## [1] "Ratio of first to second eigenvalues: 6.057"
```

```
## [1] 2.7783561 0.4586974 0.4083178 0.3546287
```

```
## Factor Analysis using method = minres
```

```
## Call: fa(r = grm_obj$X)
```

```
## Standardized loadings (pattern matrix) based upon correlation matrix
```

```
##      MR1  h2  u2 com
```

```
## Q59  0.78 0.61 0.39  1
```

```
## Q4   0.80 0.65 0.35  1
```

```
## Q107 0.77 0.59 0.41  1
```

```
## Q35  0.72 0.52 0.48  1
```

```
##
```

```
##              MR1
```

```
## SS loadings   2.37
```

```
## Proportion Var 0.59
```

```
##
```

```
## Mean item complexity = 1
```

```
## Test of the hypothesis that 1 factor is sufficient.
```

```
##
```

```
## The degrees of freedom for the null model are 6 and the objective function was 1.69 with Chi Square
```

```
## The degrees of freedom for the model are 2 and the objective function was 0
```

```
##
```

```
## The root mean square of the residuals (RMSR) is 0.01
```

```
## The df corrected root mean square of the residuals is 0.02
```

```
##
```

```
## The harmonic number of observations is 546 with the empirical chi square 0.62 with prob < 0.73
```

```
## The total number of observations was 617 with Likelihood Chi Square = 2.17 with prob < 0.34
```

```
##
```

```
## Tucker Lewis Index of factoring reliability = 1
```

```
## RMSEA index = 0.012 and the 90 % confidence intervals are 0 0.082
```

```

## BIC = -10.68
## Fit based upon off diagonal values = 1
## Measures of factor score adequacy
##
## Correlation of (regression) scores with factors      MR1
## Multiple R square of scores with factors            0.86
## Minimum correlation of possible factor scores       0.71

```

**Graded-Response Model: Substance Use**

|         | Extrmt1 | Extrmt2 | Extrmt3 | Extrmt4 | Extrmt5 | Extrmt6 | Dscrmm |
|---------|---------|---------|---------|---------|---------|---------|--------|
| ## Q59  | -0.737  | -1.144  | -1.440  | -1.781  | -2.187  | -2.403  | -3.399 |
| ## Q4   | -1.129  | -1.802  | -2.154  | -2.321  | -2.595  | -2.741  | -3.435 |
| ## Q107 | -1.326  | -1.790  | -2.011  | -2.285  | -2.532  | -2.711  | -3.324 |
| ## Q35  | -1.414  | -1.848  | -2.114  | -2.354  | -2.649  | -3.064  | -3.149 |

**Test Information Function**

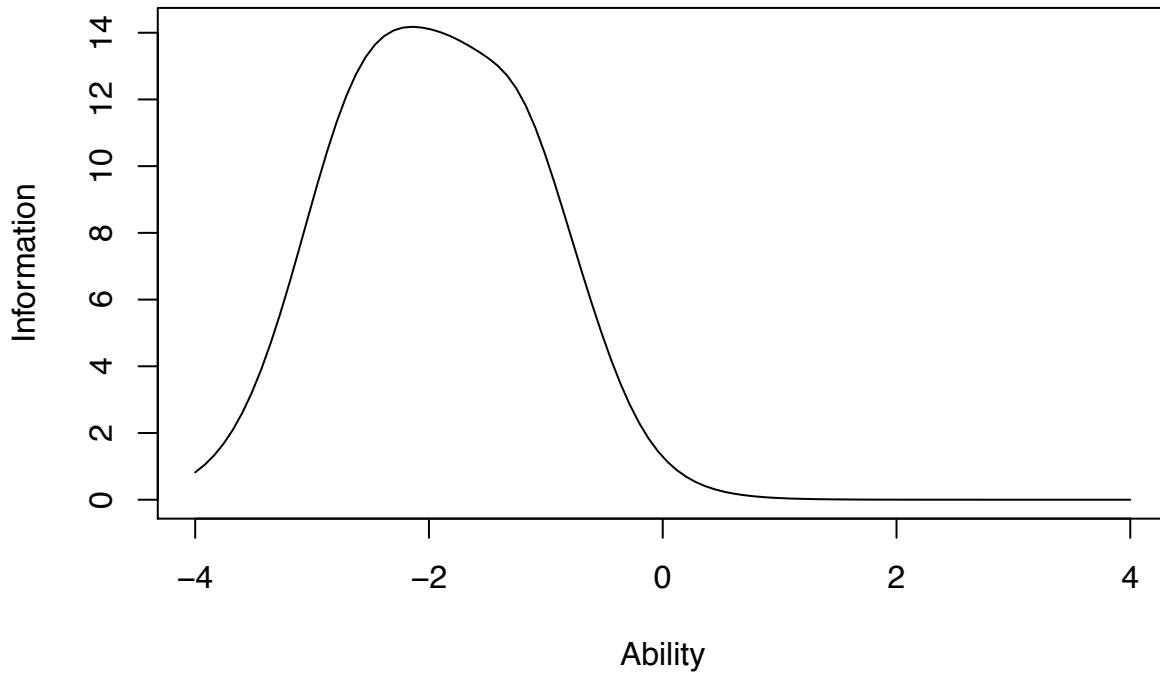

## Item Information Curves

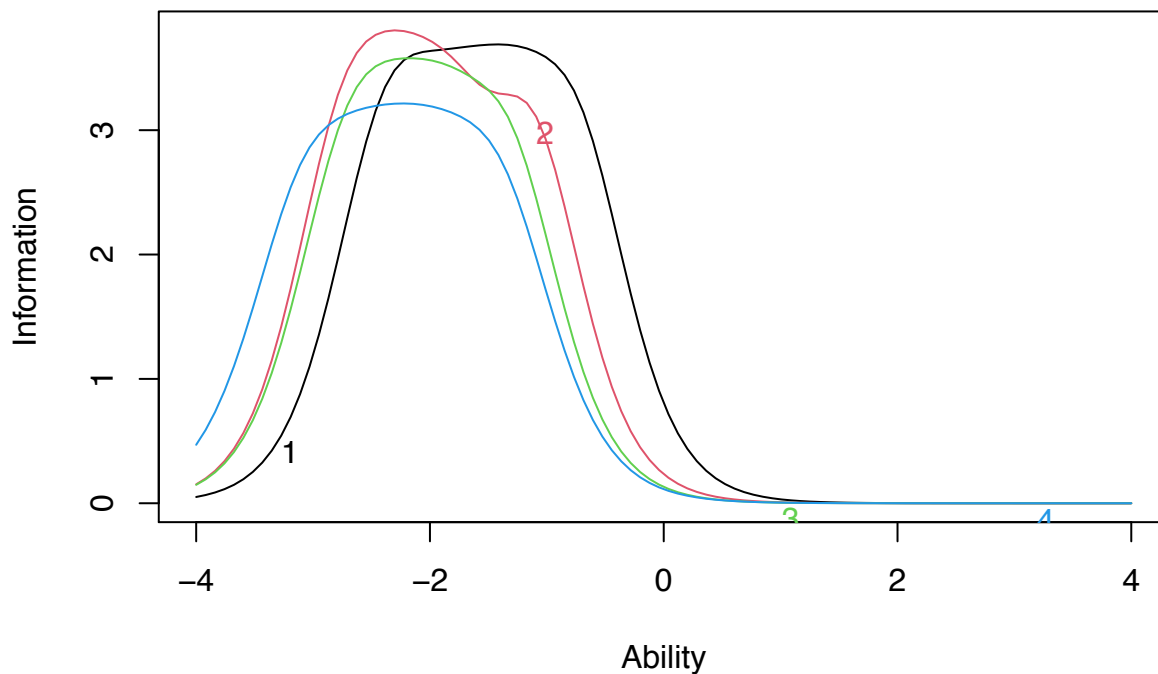

Back to top

### Site 2

#### Reliability: Substance Use

## Cronbach's alpha is 0.917.

## Mean item-total correlation is 0.755.

## If each item were dropped:

| ##      | raw_alpha | std.alpha | G6(smc) | average_r | S/N  | alpha se | var.r   | med.r |
|---------|-----------|-----------|---------|-----------|------|----------|---------|-------|
| ## Q59  | 0.92      | 0.92      | 0.88    | 0.79      | 11.1 | 0.0059   | 0.00079 | 0.80  |
| ## Q4   | 0.88      | 0.89      | 0.84    | 0.72      | 7.9  | 0.0084   | 0.00192 | 0.74  |
| ## Q107 | 0.88      | 0.90      | 0.86    | 0.74      | 8.7  | 0.0082   | 0.00429 | 0.75  |
| ## Q35  | 0.90      | 0.91      | 0.87    | 0.77      | 9.8  | 0.0070   | 0.00100 | 0.75  |



## Scree Plot

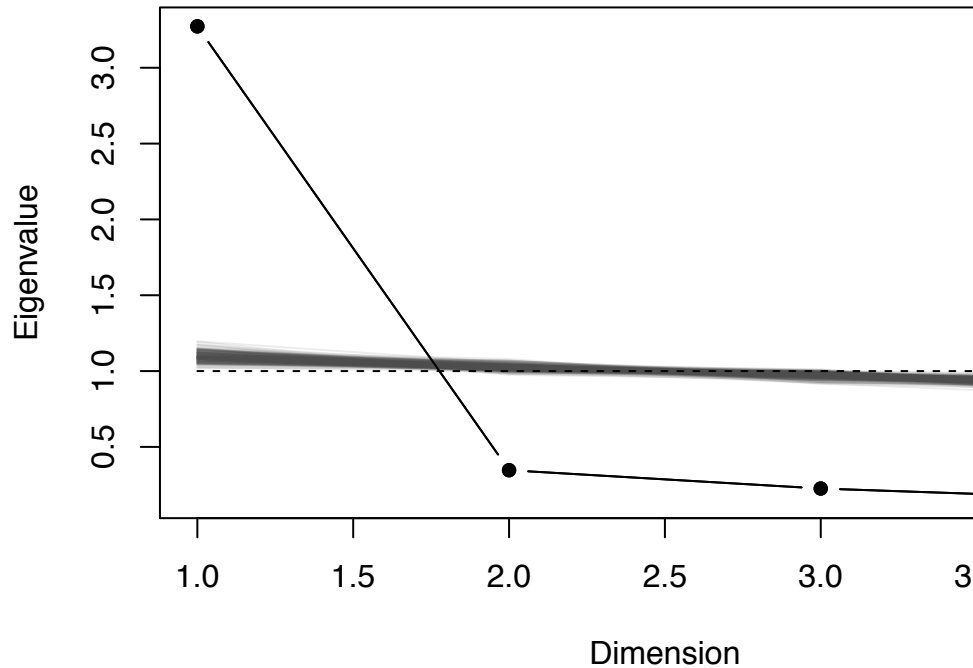

### Unidimensionality: Substance Use

```
## [1] "Ratio of first to second eigenvalues: 9.448"
## [1] 3.2729631 0.3464255 0.2256145 0.1549969
## Factor Analysis using method = minres
## Call: fa(r = grm_obj$X)
## Standardized loadings (pattern matrix) based upon correlation matrix
##      MR1  h2  u2 com
## Q59  0.81 0.65 0.35  1
## Q4   0.93 0.87 0.13  1
## Q107 0.89 0.79 0.21  1
## Q35  0.85 0.73 0.27  1
##
##              MR1
## SS loadings   3.04
## Proportion Var 0.76
##
## Mean item complexity = 1
## Test of the hypothesis that 1 factor is sufficient.
##
## The degrees of freedom for the null model are 6 and the objective function was 3.23 with Chi Square
## The degrees of freedom for the model are 2 and the objective function was 0.05
##
## The root mean square of the residuals (RMSR) is 0.02
## The df corrected root mean square of the residuals is 0.04
##
## The harmonic number of observations is 520 with the empirical chi square 2.82 with prob < 0.24
## The total number of observations was 596 with Likelihood Chi Square = 28.56 with prob < 6.3e-07
##
## Tucker Lewis Index of factoring reliability = 0.958
## RMSEA index = 0.149 and the 90 % confidence intervals are 0.104 0.2
```

```
## BIC = 15.78
## Fit based upon off diagonal values = 1
## Measures of factor score adequacy
##
## Correlation of (regression) scores with factors    MR1
## Multiple R square of scores with factors          0.94
## Minimum correlation of possible factor scores     0.88
```

### Graded-Response Model: Substance Use

| ##      | Extrmt1 | Extrmt2 | Extrmt3 | Extrmt4 | Extrmt5 | Extrmt6 | Dscrmm |
|---------|---------|---------|---------|---------|---------|---------|--------|
| ## Q59  | -0.737  | -1.057  | -1.291  | -1.581  | -1.845  | -2.047  | -2.745 |
| ## Q4   | -1.153  | -1.454  | -1.638  | -1.969  | -2.178  | -2.579  | -3.523 |
| ## Q107 | -1.000  | -1.370  | -1.620  | -1.870  | -2.091  | -2.313  | -3.112 |
| ## Q35  | -1.157  | -1.545  | -1.766  | -2.062  | -2.223  | -2.387  | -3.478 |

### Test Information Function

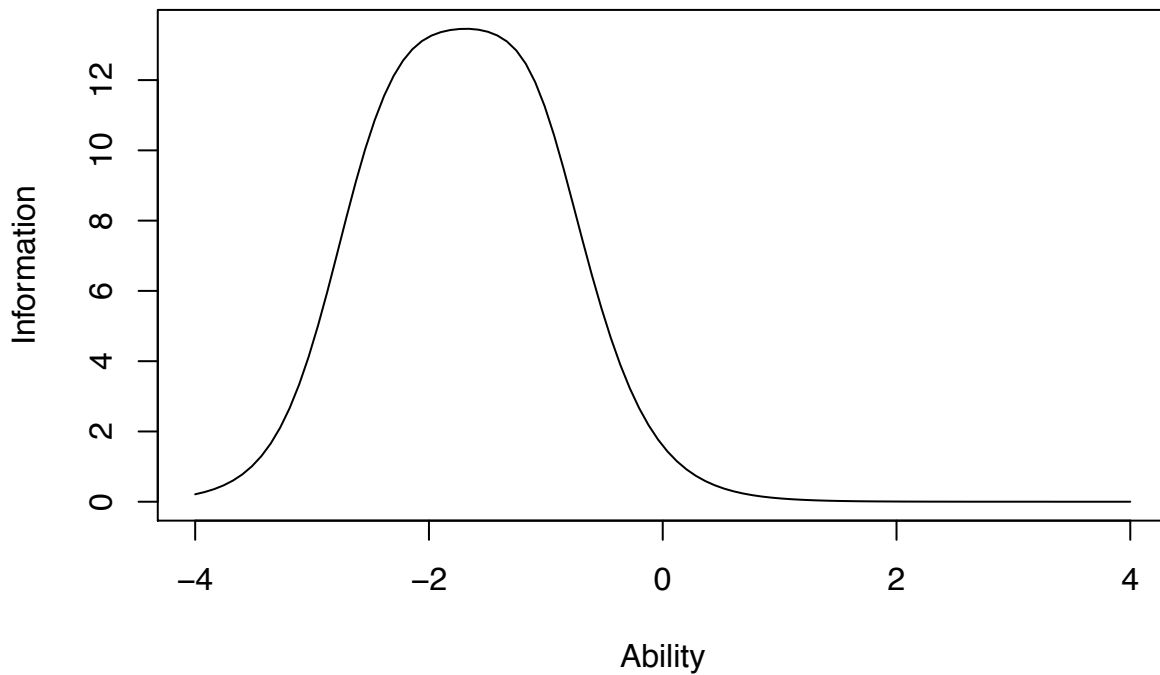

## Item Information Curves

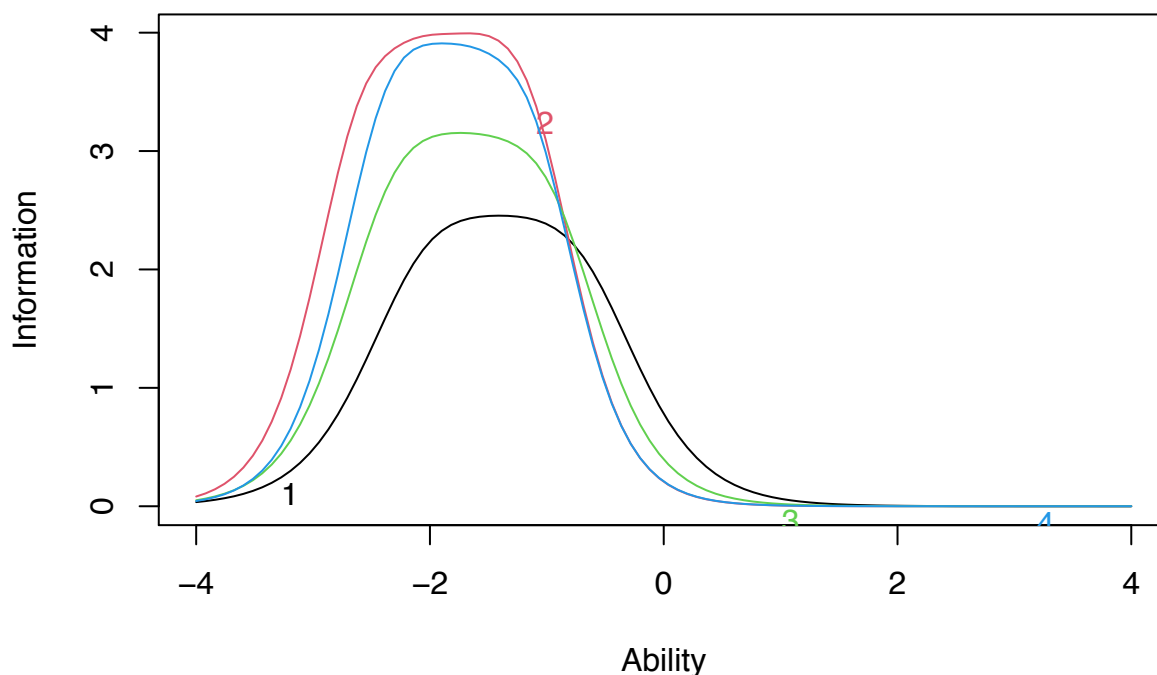

Back to top

### Site DIF

```
## Call:
## lordif::lordif(resp.data = as.data.frame(merged_data), group = site)
##
##   Number of DIF groups: 2
##
##   Number of items flagged for DIF: 1 of 4
##
##   Items flagged: 3
##
##   Number of iterations for purification: 2 of 10
##
##   Detection criterion: Chisqr
##
##   Threshold: alpha = 0.01
##
##   item ncat  chi12  chi13  chi23
## 1     1     7 0.8874 0.7627 0.4701
## 2     2     6 0.4715 0.5554 0.4174
## 3     3     6 0.0004 0.0018 0.5952
## 4     4     6 0.4924 0.7698 0.8195
```

## Trait Distributions

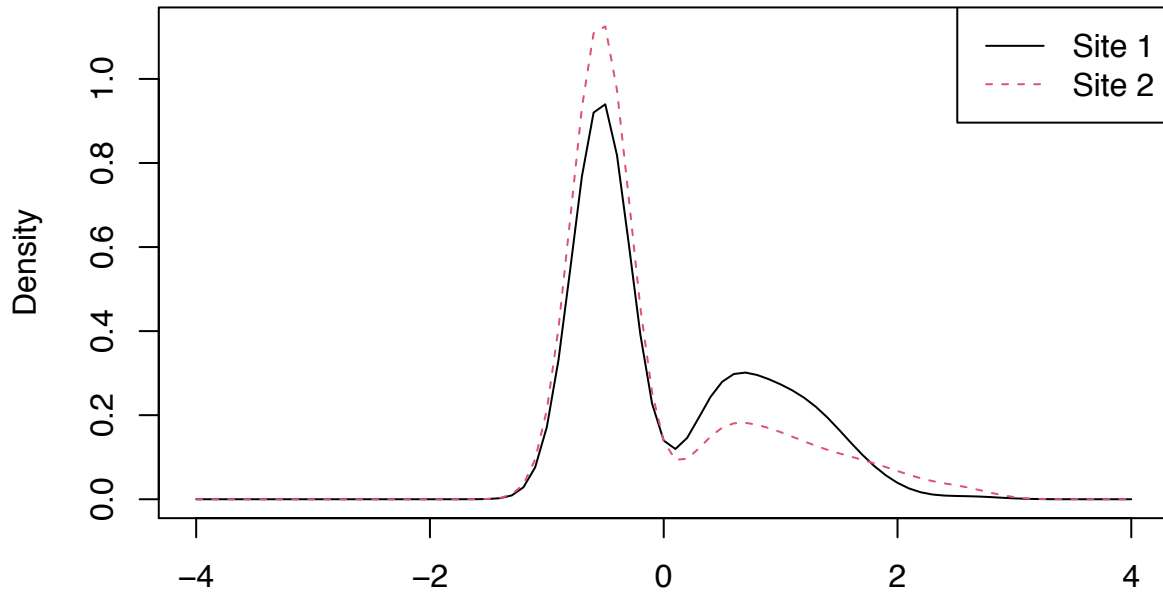

### Item True Score Functions – Item 3

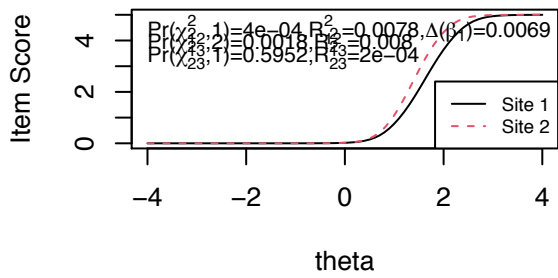

### Differences in Item True Score Function

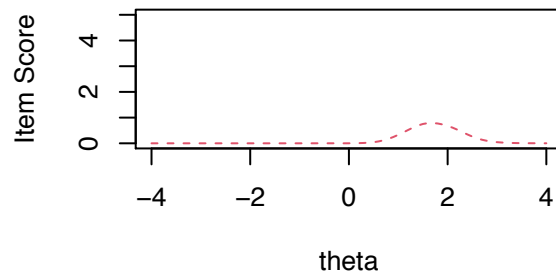

### Item Response Functions

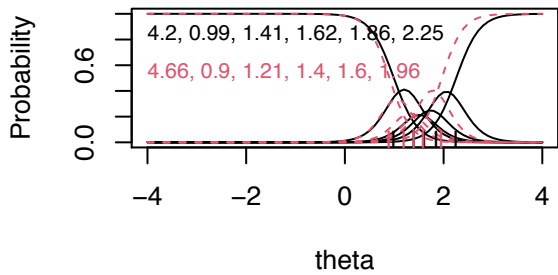

### Impact (Weighted by Density)

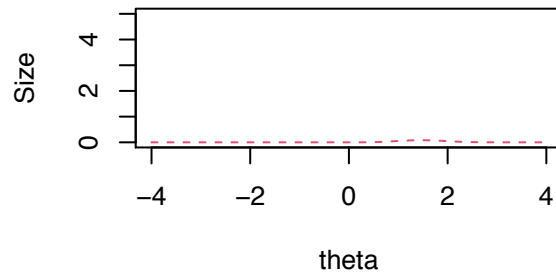

**All Items**

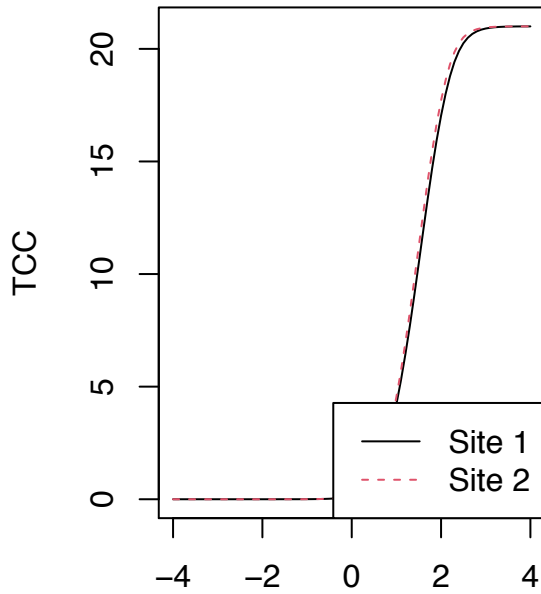

**DIF Items**

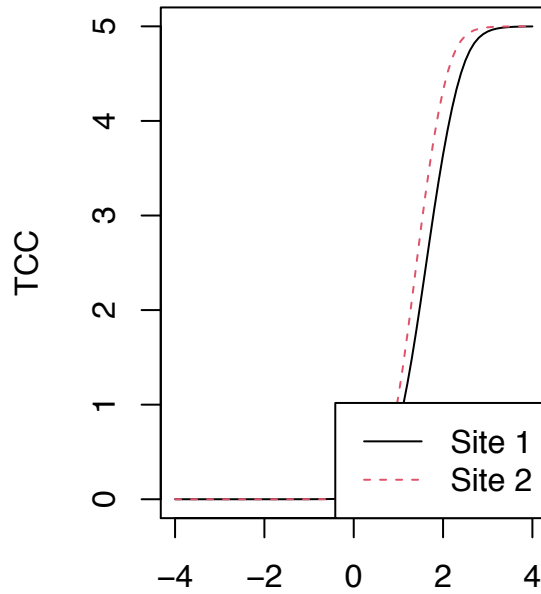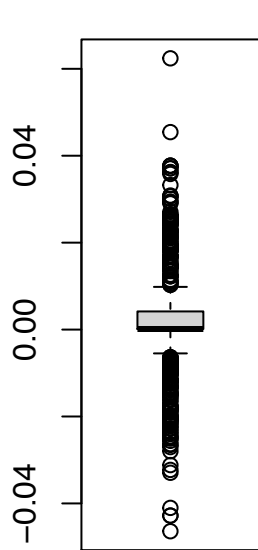

theta

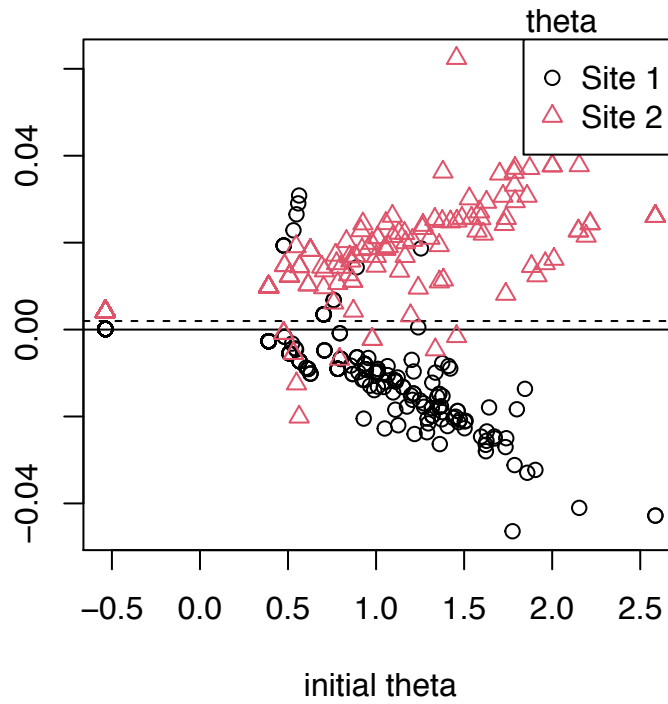

theta

[Back to top](#)

### Gender-based DIF: Substance Use

```
## Call:  
## lordif::lordif(resp.data = as.data.frame(sex.data), group = sex)  
##  
## Number of DIF groups: 2
```

```
##
## Number of items flagged for DIF: 0 of 4
##
## Items flagged:
##
## Number of iterations for purification: 1 of 10
##
## Detection criterion: Chisqr
##
## Threshold: alpha = 0.01
```

### Age-based DIF: Substance Use

```
## Call:
## lordif::lordif(resp.data = as.data.frame(age.data), group = age)
##
## Number of DIF groups: 2
##
## Number of items flagged for DIF: 1 of 4
##
## Items flagged: 4
##
## Number of iterations for purification: 2 of 10
##
## Detection criterion: Chisqr
##
## Threshold: alpha = 0.01
##
## item ncat chi12 chi13 chi23
## 1 1 7 0.4450 0.7122 0.7571
## 2 2 7 0.5039 0.2775 0.1457
## 3 3 6 0.5665 0.4831 0.2885
## 4 4 7 0.0003 0.0005 0.1325
```

## Trait Distributions

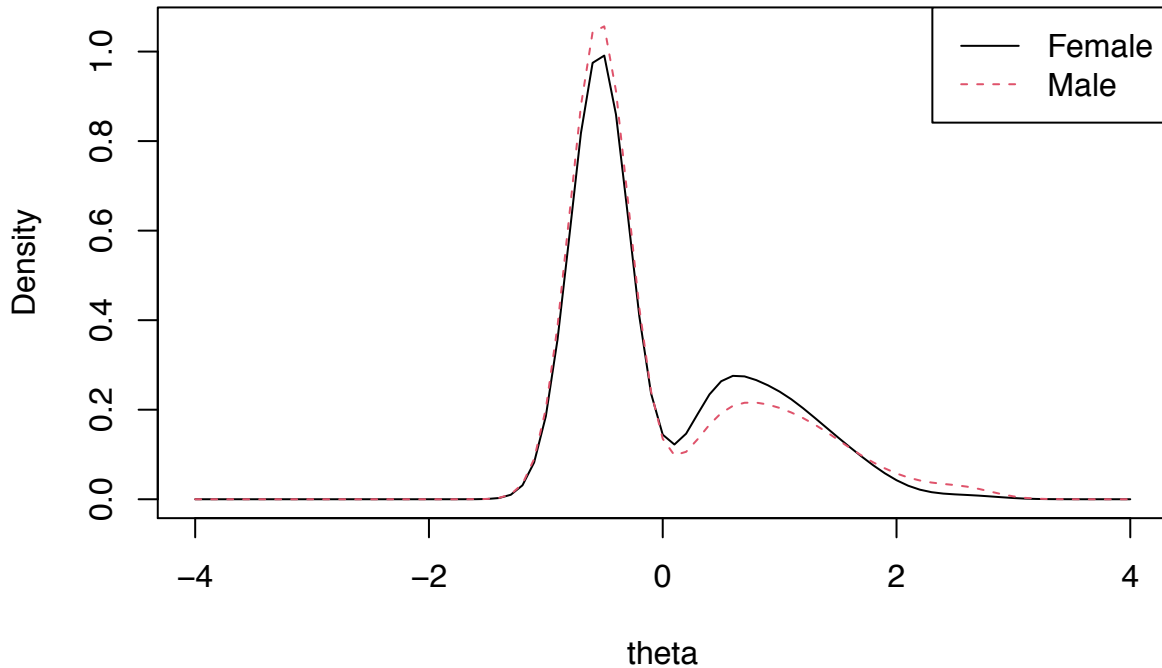

### Item True Score Functions – Item 4

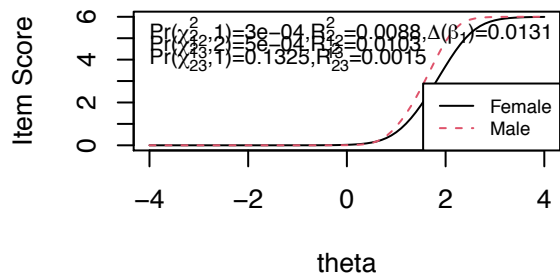

### Differences in Item True Score Function

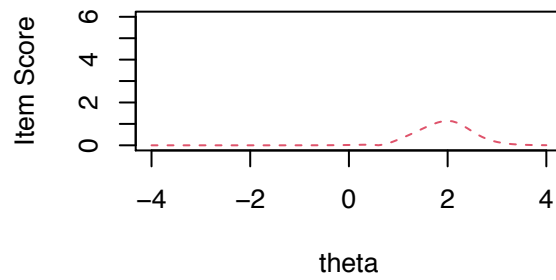

### Item Response Functions

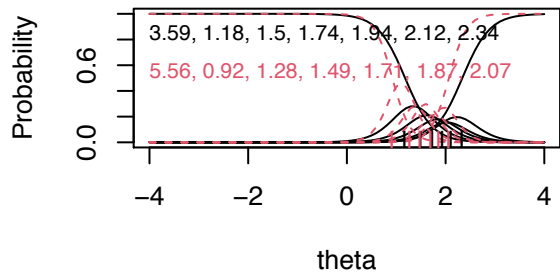

### Impact (Weighted by Density)

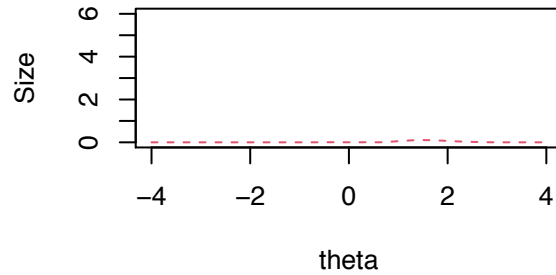

**All Items**

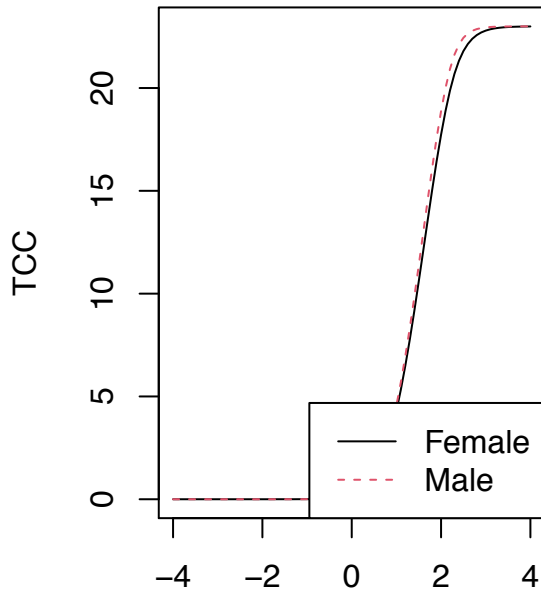

**DIF Items**

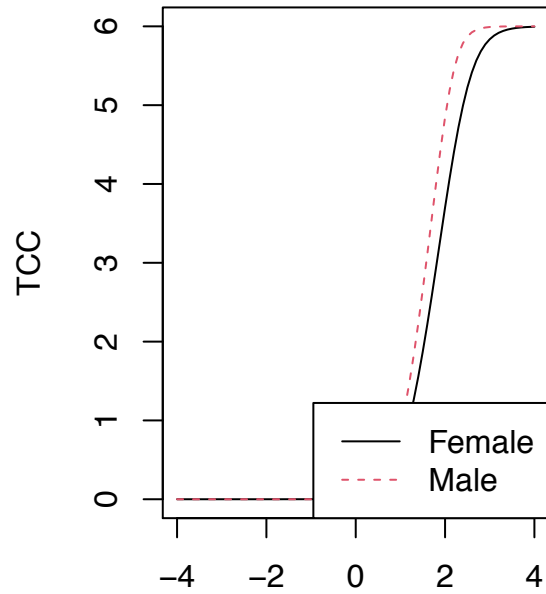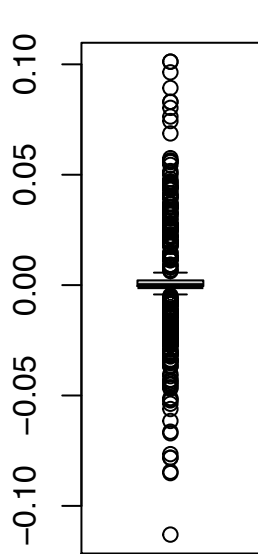

theta

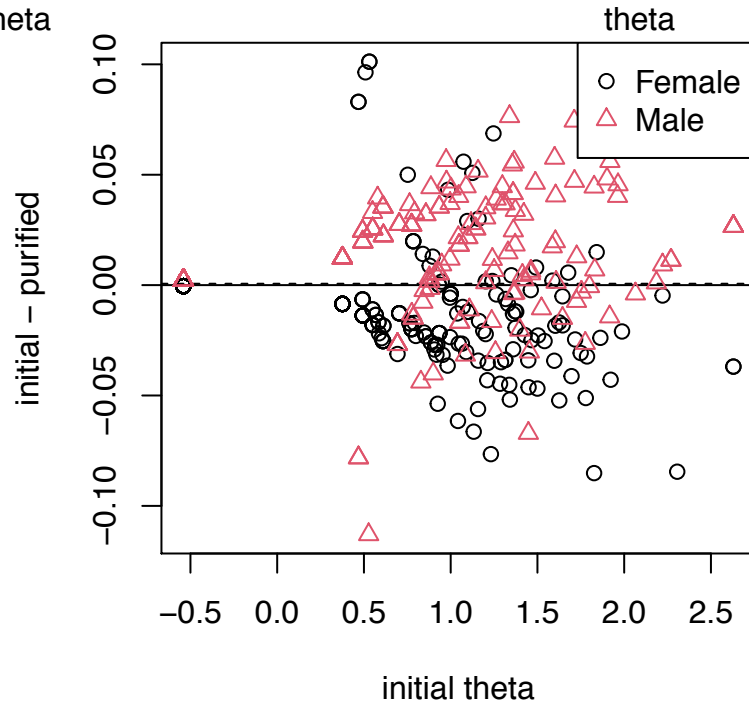

theta

[Back to top](#)

## Suicide

Site 1

Did not converge.



Site 2

Reliability: Suicide

```
## Cronbach's alpha is 0.823.  
## Mean item-total correlation is 0.575.  
## If each item were dropped:  
##      raw_alpha std.alpha G6(smc) average_r S/N alpha se   var.r med.r  
## Q19      0.76      0.80   0.72      0.57 3.9   0.015 4.3e-04 0.56  
## Q105     0.76      0.80   0.73      0.57 4.0   0.015 2.5e-04 0.57  
## Q77      0.77      0.81   0.74      0.59 4.3   0.014 2.7e-05 0.59  
## Q106     0.80      0.80   0.73      0.57 4.1   0.014 3.5e-04 0.57
```

Scree Plot

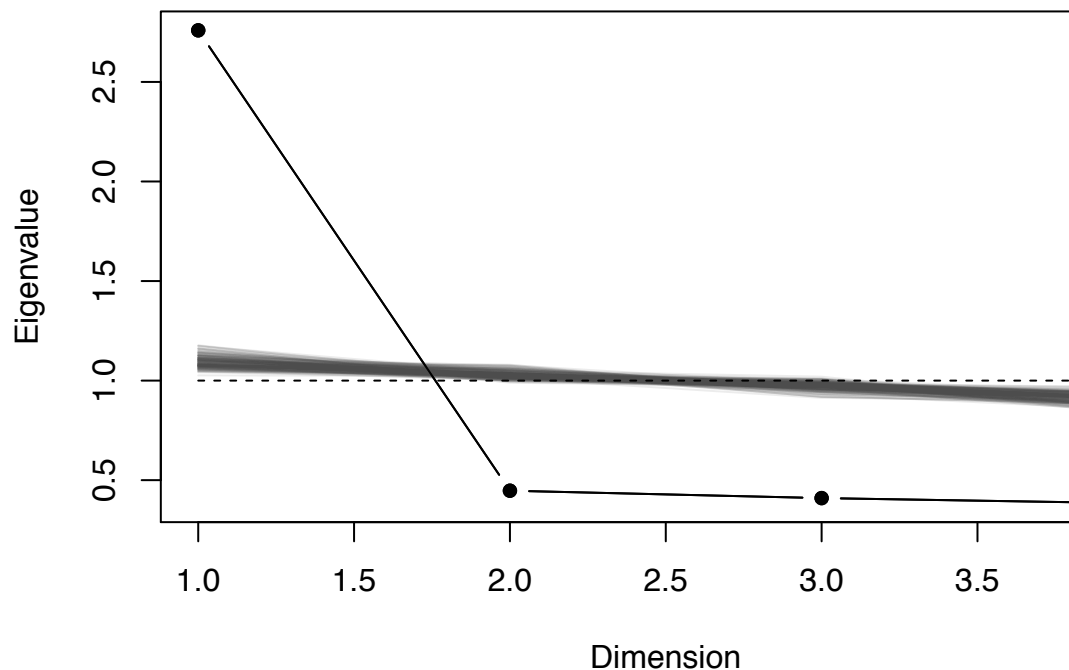

Unidimensionality: Suicide

```
## [1] "Ratio of first to second eigenvalues: 6.173"  
## [1] 2.7591314 0.4469352 0.4098761 0.3840574  
## Factor Analysis using method = minres  
## Call: fa(r = grm_obj$X)  
## Standardized loadings (pattern matrix) based upon correlation matrix  
##      MR1   h2   u2 com  
## Q19 0.79 0.62 0.38 1  
## Q105 0.77 0.60 0.40 1  
## Q77 0.74 0.55 0.45 1  
## Q106 0.76 0.58 0.42 1  
##  
##              MR1  
## SS loadings  2.35  
## Proportion Var 0.59  
##
```

```

## Mean item complexity = 1
## Test of the hypothesis that 1 factor is sufficient.
##
## The degrees of freedom for the null model are 6 and the objective function was 1.64 with Chi Squa
## The degrees of freedom for the model are 2 and the objective function was 0
##
## The root mean square of the residuals (RMSR) is 0.01
## The df corrected root mean square of the residuals is 0.01
##
## The harmonic number of observations is 567 with the empirical chi square 0.36 with prob < 0.84
## The total number of observations was 596 with Likelihood Chi Square = 1.11 with prob < 0.57
##
## Tucker Lewis Index of factoring reliability = 1.003
## RMSEA index = 0 and the 90 % confidence intervals are 0 0.068
## BIC = -11.67
## Fit based upon off diagonal values = 1
## Measures of factor score adequacy
##
##                                     MR1
## Correlation of (regression) scores with factors 0.92
## Multiple R square of scores with factors 0.85
## Minimum correlation of possible factor scores 0.70

```

#### Graded-Response Model: Suicide

|         | Extrmt1 | Extrmt2 | Extrmt3 | Extrmt4 | Extrmt5 | Extrmt6 | Dscrmn |
|---------|---------|---------|---------|---------|---------|---------|--------|
| ## Q19  | -0.801  | -1.335  | -1.747  | -2.089  | -2.401  | -2.620  | -2.500 |
| ## Q105 | -1.602  | -1.753  | -1.805  | -2.049  | -2.169  | -2.266  | -3.606 |
| ## Q77  | -1.442  | -1.859  | -1.907  | -2.128  | -2.413  | -2.682  | -3.375 |
| ## Q106 | -2.015  | -2.317  | -2.601  | -2.983  | -3.275  | -3.581  | -2.090 |

#### Test Information Function

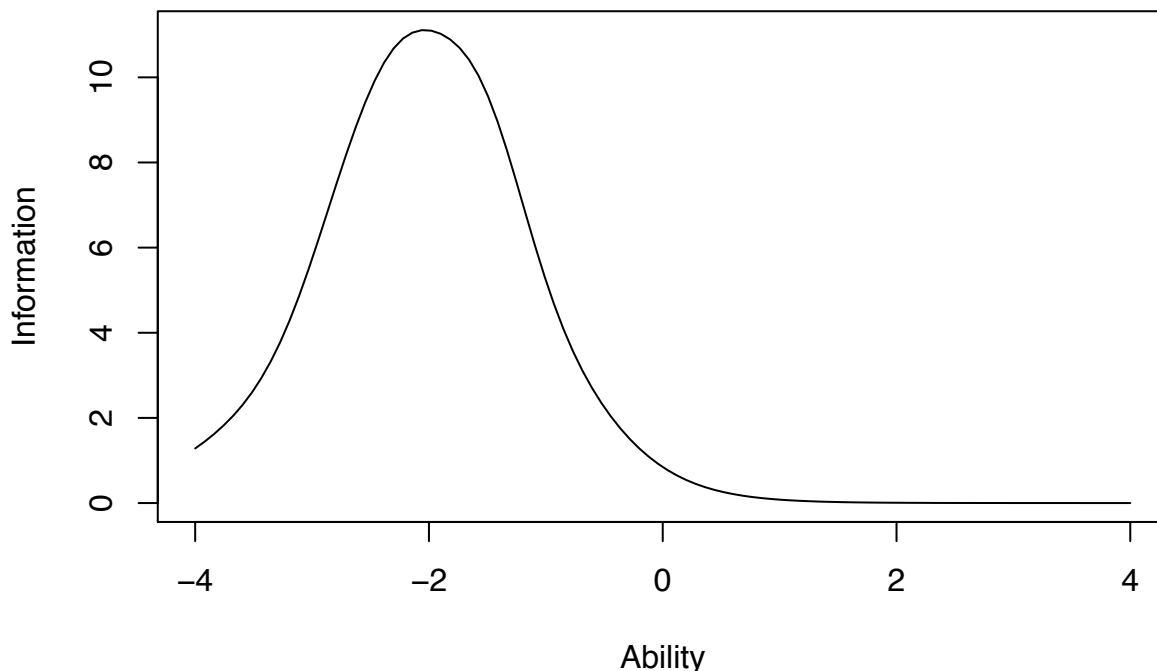

## Item Information Curves

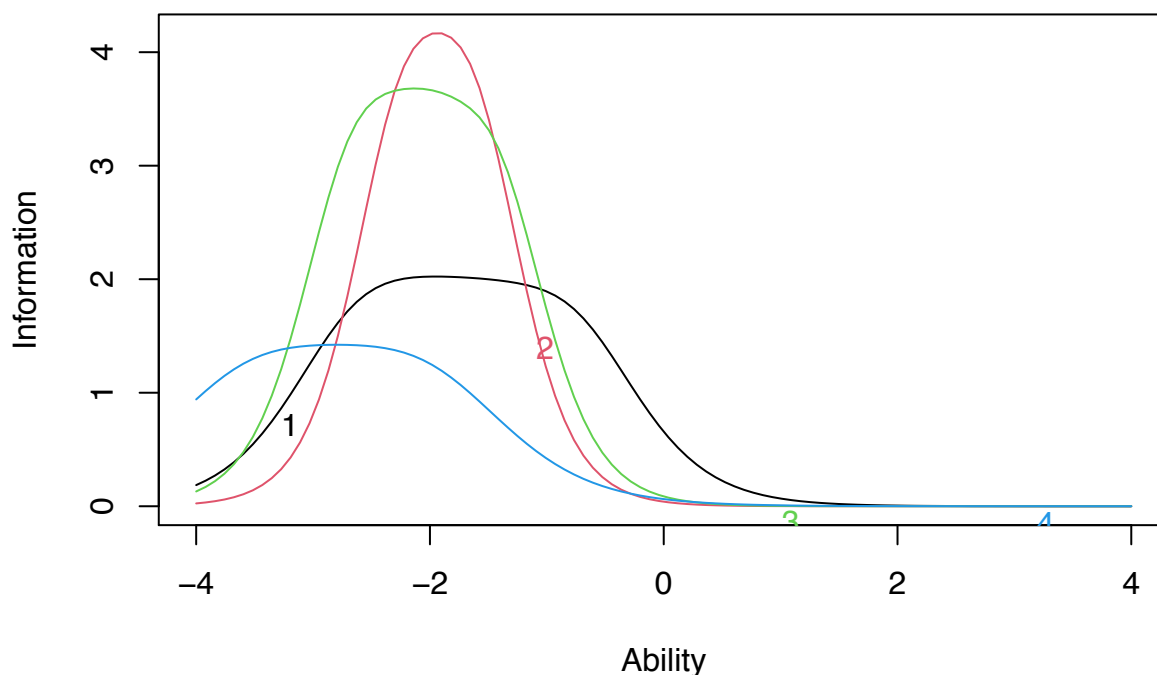

Back to top

### Gender-based DIF: Suicide

```
## Call:
## lordif::lordif(resp.data = as.data.frame(sex.data), group = sex)
##
## Number of DIF groups: 2
##
## Number of items flagged for DIF: 1 of 4
##
## Items flagged: 2
##
## Number of iterations for purification: 2 of 10
##
## Detection criterion: Chisqr
##
## Threshold: alpha = 0.01
##
## item ncat chi12 chi13 chi23
## 1 1 7 0.5858 0.4369 0.2437
## 2 2 7 0.0052 0.0000 0.0001
## 3 3 7 0.8737 0.5515 0.2805
## 4 4 5 0.4501 0.1497 0.0724
```

## Trait Distributions

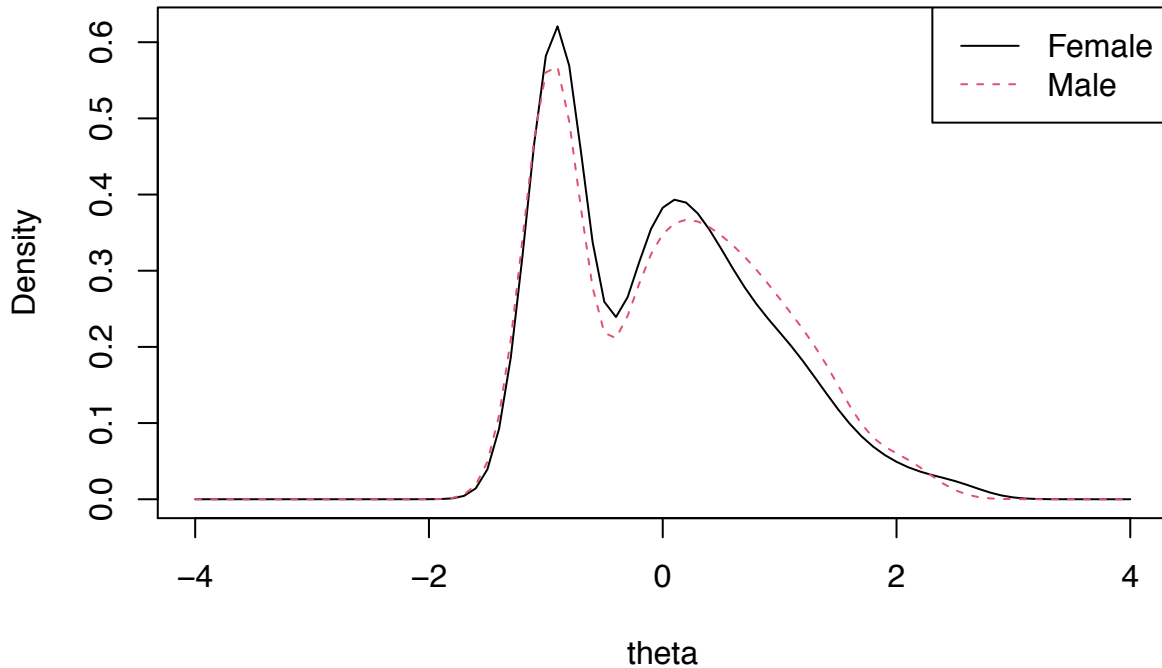

**Item True Score Functions – Item 2**

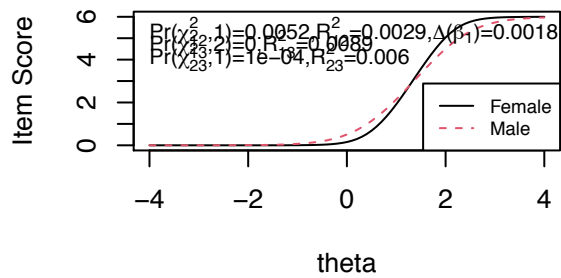

**Differences in Item True Score Function**

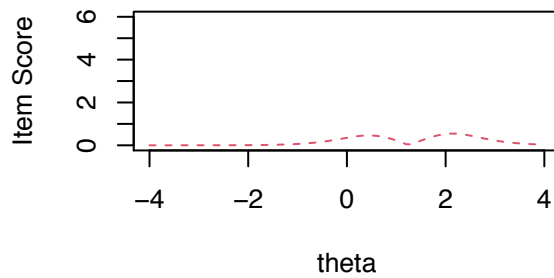

**Item Response Functions**

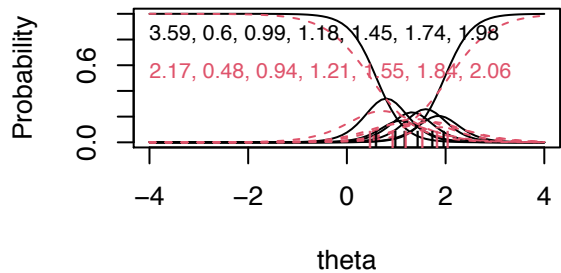

**Impact (Weighted by Density)**

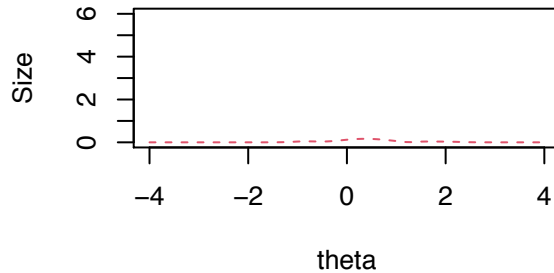

All Items

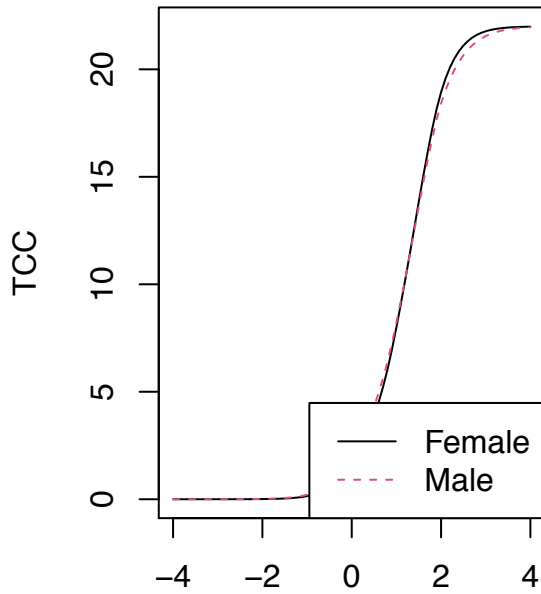

DIF Items

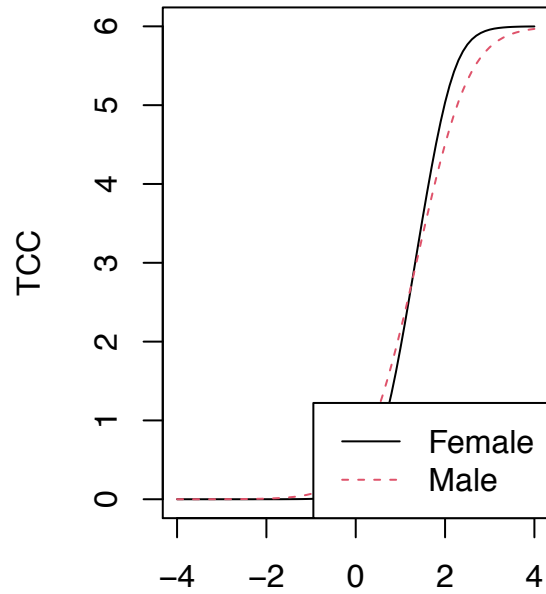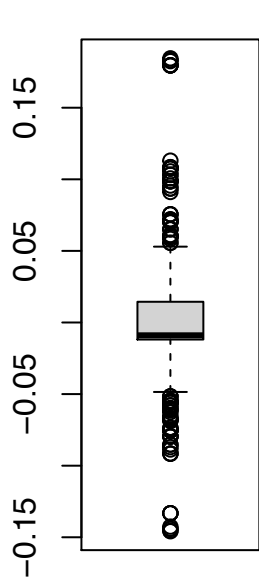

theta

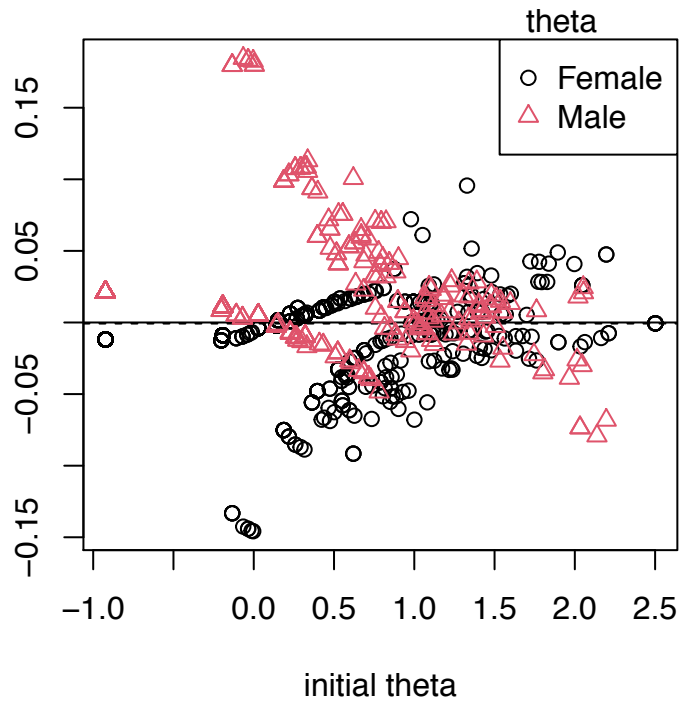

theta

Age-based DIF: Suicide

```
## Call:
## lordif::lordif(resp.data = as.data.frame(age.data), group = age)
##
## Number of DIF groups: 2
##
```

```
## Number of items flagged for DIF: 1 of 4
##
## Items flagged: 4
##
## Number of iterations for purification: 2 of 10
##
## Detection criterion: Chisqr
##
## Threshold: alpha = 0.01
##
## item ncat chi12 chi13 chi23
## 1 1 7 0.7743 0.4980 0.2520
## 2 2 7 0.1809 0.2467 0.3153
## 3 3 7 0.7417 0.9157 0.7952
## 4 4 4 0.0001 0.0001 0.0712
```

### Trait Distributions

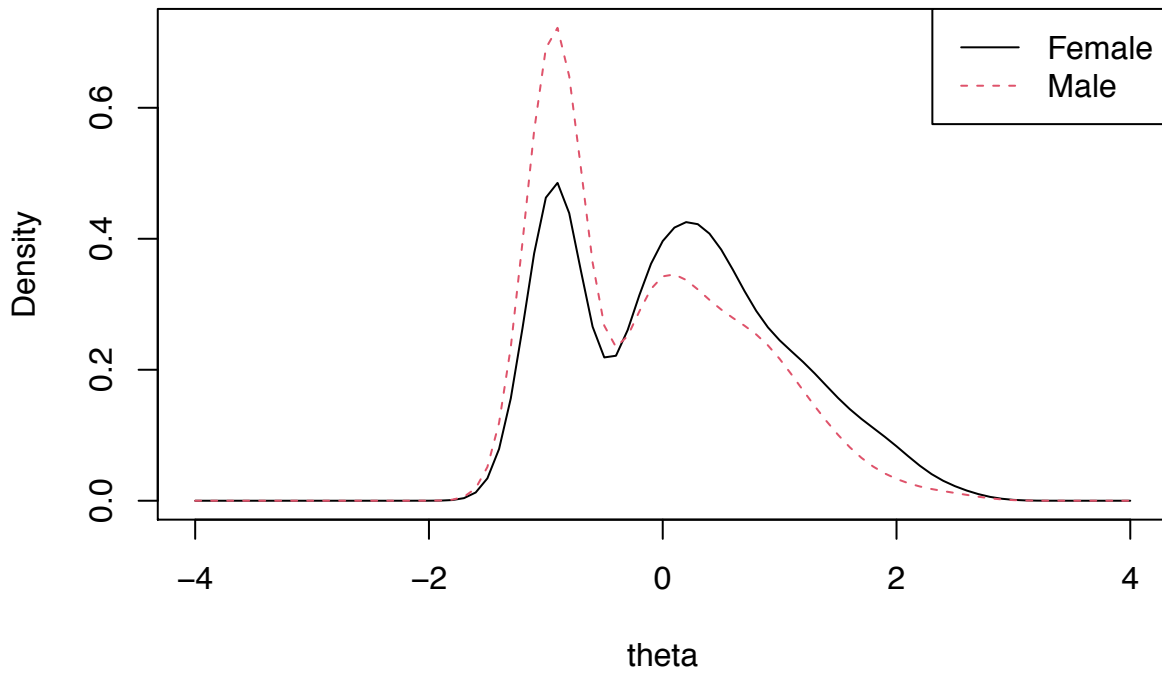

**Item True Score Functions – Item 4**

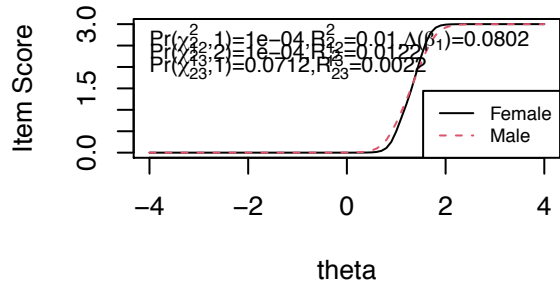

**Differences in Item True Score Function**

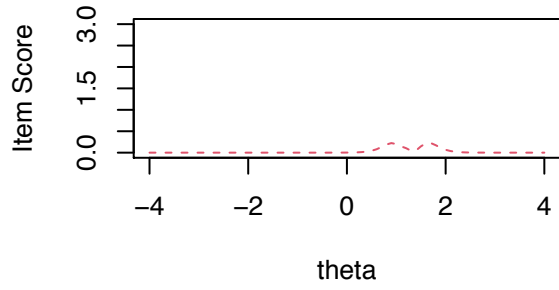

**Item Response Functions**

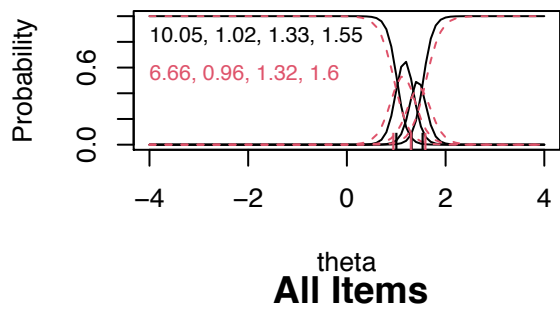

**Impact (Weighted by Density)**

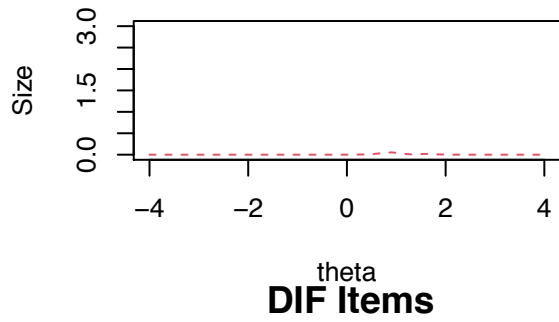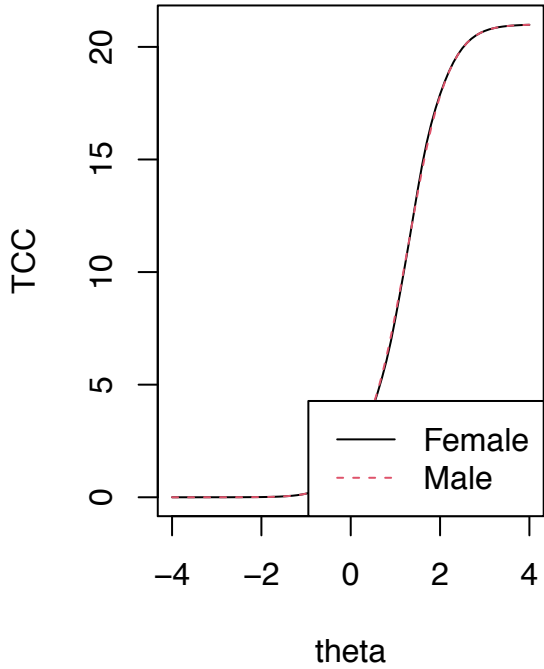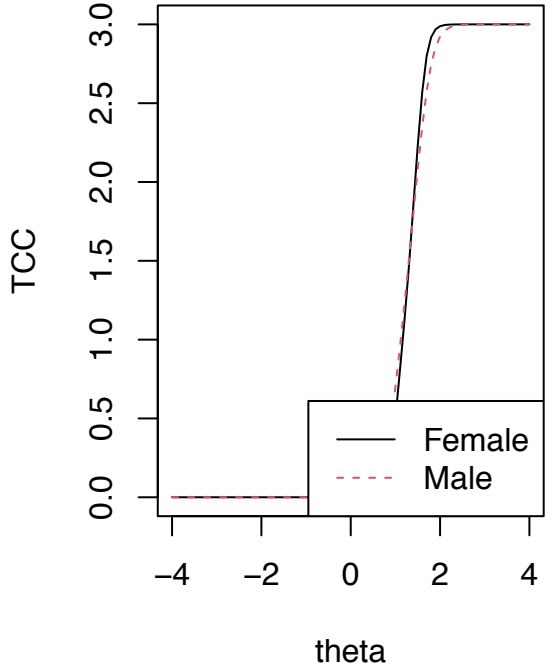

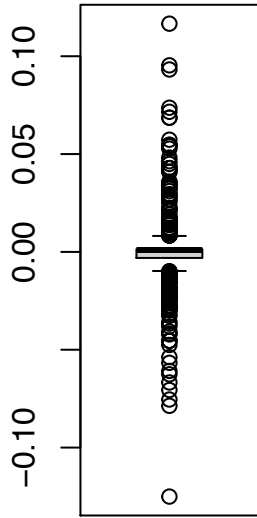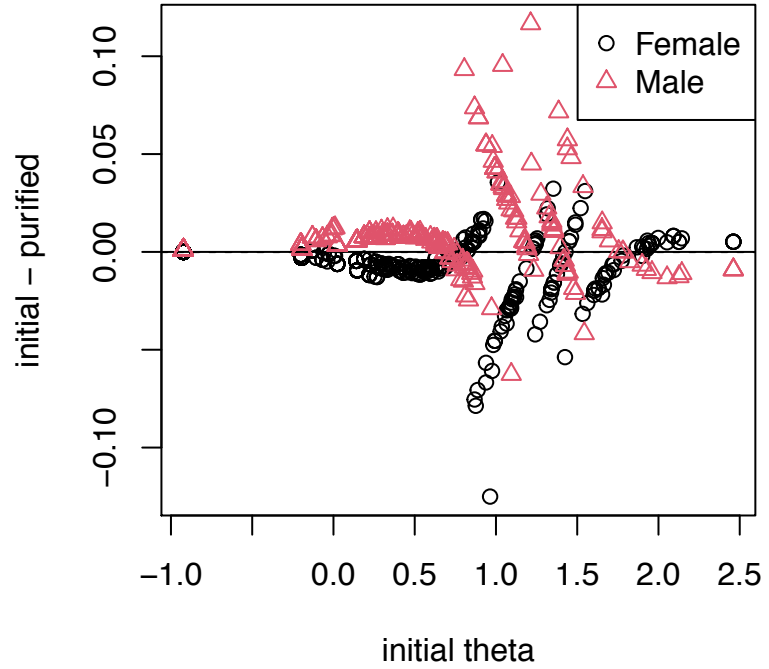

Back to top

## Trauma Reaction

Site 1

### Reliability: Trauma Reaction

```
## Cronbach's alpha is 0.744.
## Mean item-total correlation is 0.425.
## If each item were dropped:
##      raw_alpha std.alpha G6(smc) average_r S/N alpha se  var.r med.r
## Q111    0.59    0.59    0.50    0.33 1.5   0.029 0.0042  0.32
## Q110    0.71    0.72    0.68    0.46 2.6   0.021 0.0417  0.37
## Q113    0.77    0.77    0.72    0.53 3.4   0.016 0.0227  0.50
## Q112    0.65    0.65    0.57    0.38 1.8   0.025 0.0139  0.37
```



## Scree Plot

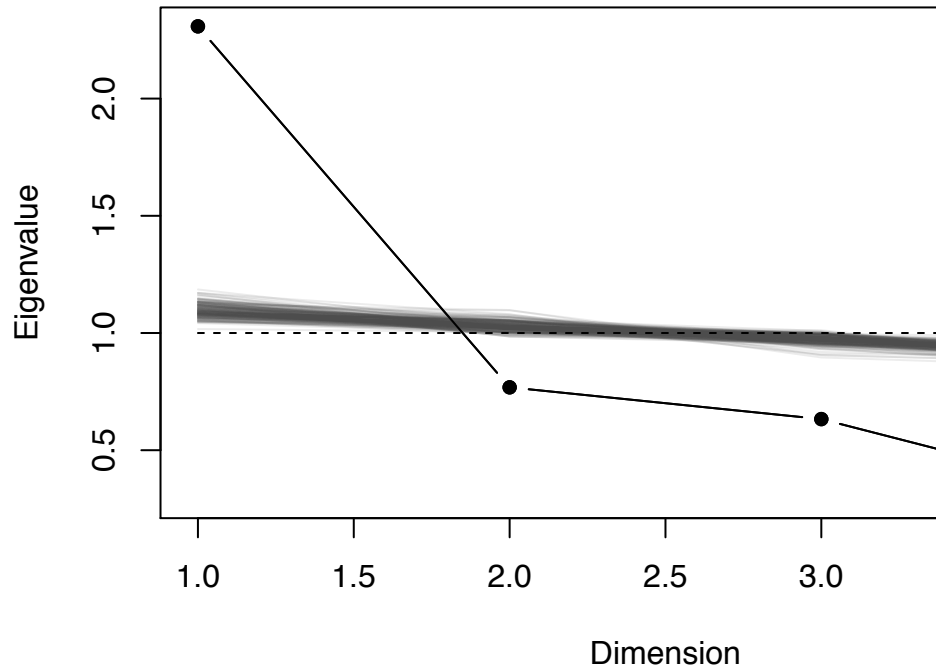

### Unidimensionality: Trauma Reaction

```
## [1] "Ratio of first to second eigenvalues: 3.004"
## [1] 2.3081635 0.7682523 0.6327374 0.2908468
## Factor Analysis using method = minres
## Call: fa(r = grm_obj$X)
## Standardized loadings (pattern matrix) based upon correlation matrix
##      MR1  h2  u2 com
## Q111 0.91 0.83 0.17  1
## Q110 0.55 0.31 0.69  1
## Q113 0.42 0.18 0.82  1
## Q112 0.75 0.56 0.44  1
##
##              MR1
## SS loadings  1.88
## Proportion Var 0.47
##
## Mean item complexity = 1
## Test of the hypothesis that 1 factor is sufficient.
##
## The degrees of freedom for the null model are 6 and the objective function was 1.12 with Chi Squa
## The degrees of freedom for the model are 2 and the objective function was 0.01
##
## The root mean square of the residuals (RMSR) is 0.02
## The df corrected root mean square of the residuals is 0.03
##
## The harmonic number of observations is 547 with the empirical chi square 1.96 with prob < 0.38
## The total number of observations was 617 with Likelihood Chi Square = 3.16 with prob < 0.21
##
## Tucker Lewis Index of factoring reliability = 0.995
## RMSEA index = 0.031 and the 90 % confidence intervals are 0 0.091
```

```

## BIC = -9.69
## Fit based upon off diagonal values = 1
## Measures of factor score adequacy
##
## Correlation of (regression) scores with factors      MR1
## Multiple R square of scores with factors            0.87
## Minimum correlation of possible factor scores       0.75

```

**Graded-Response Model: Trauma Reaction**

| ##      | Extrmt1 | Extrmt2 | Extrmt3 | Extrmt4 | Extrmt5 | Extrmt6 | Dscrmn |
|---------|---------|---------|---------|---------|---------|---------|--------|
| ## Q111 | -0.415  | 0.060   | 0.401   | 0.680   | 0.992   | 1.163   | 2.688  |
| ## Q110 | 0.284   | 0.541   | 0.712   | 0.968   | 1.209   | 1.462   | 2.038  |
| ## Q113 | -1.105  | -0.600  | -0.256  | 0.169   | 1.007   | 1.512   | 0.982  |
| ## Q112 | 0.066   | 0.271   | 0.425   | 0.685   | 0.936   | 1.097   | 4.074  |

**Test Information Function**

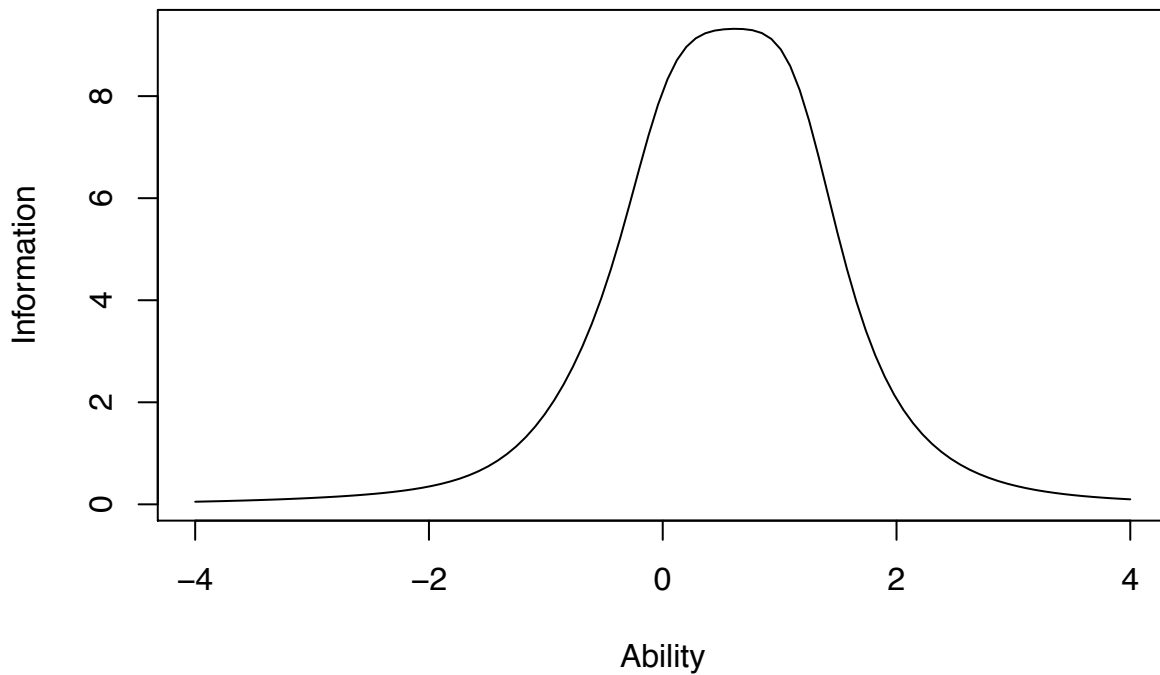

## Item Information Curves

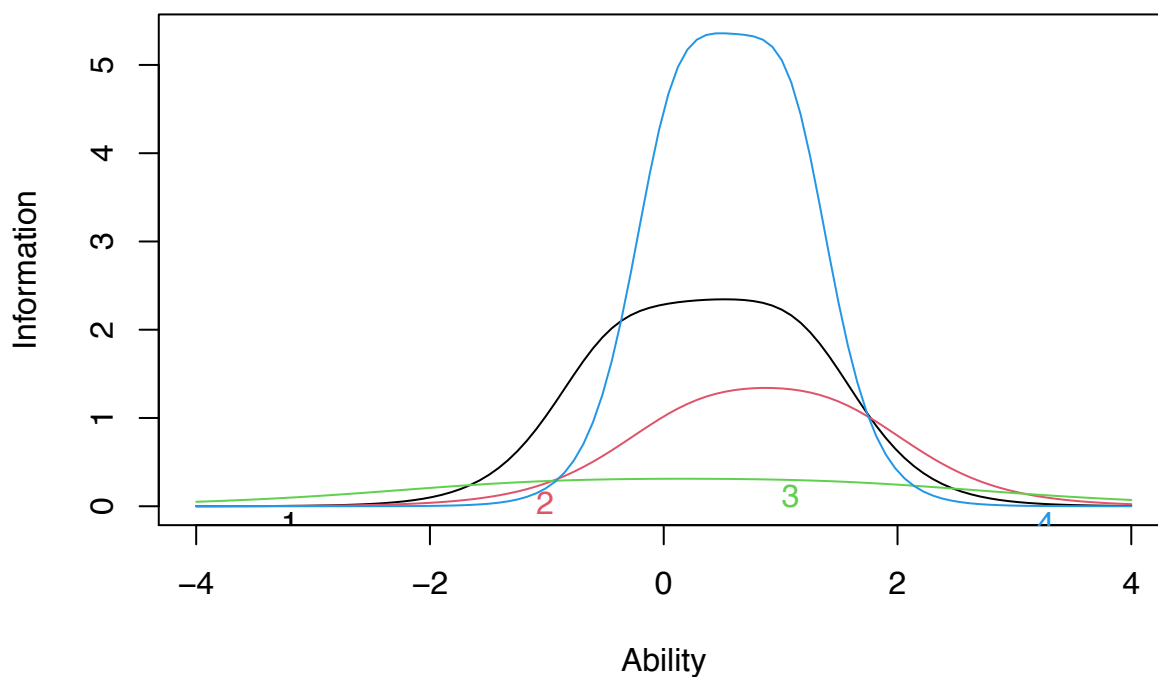

Back to top

### Site 2

#### Reliability: Trauma Reaction

## Cronbach's alpha is 0.765.

## Mean item-total correlation is 0.454.

## If each item were dropped:

| ##      | raw_alpha | std.alpha | G6(smc) | average_r | S/N | alpha se | var.r  | med.r |
|---------|-----------|-----------|---------|-----------|-----|----------|--------|-------|
| ## Q111 | 0.65      | 0.65      | 0.56    | 0.38      | 1.9 | 0.025    | 0.0025 | 0.37  |
| ## Q110 | 0.72      | 0.73      | 0.67    | 0.47      | 2.7 | 0.020    | 0.0228 | 0.40  |
| ## Q113 | 0.78      | 0.78      | 0.71    | 0.54      | 3.5 | 0.016    | 0.0104 | 0.53  |
| ## Q112 | 0.68      | 0.69      | 0.61    | 0.42      | 2.2 | 0.023    | 0.0096 | 0.40  |

## Scree Plot

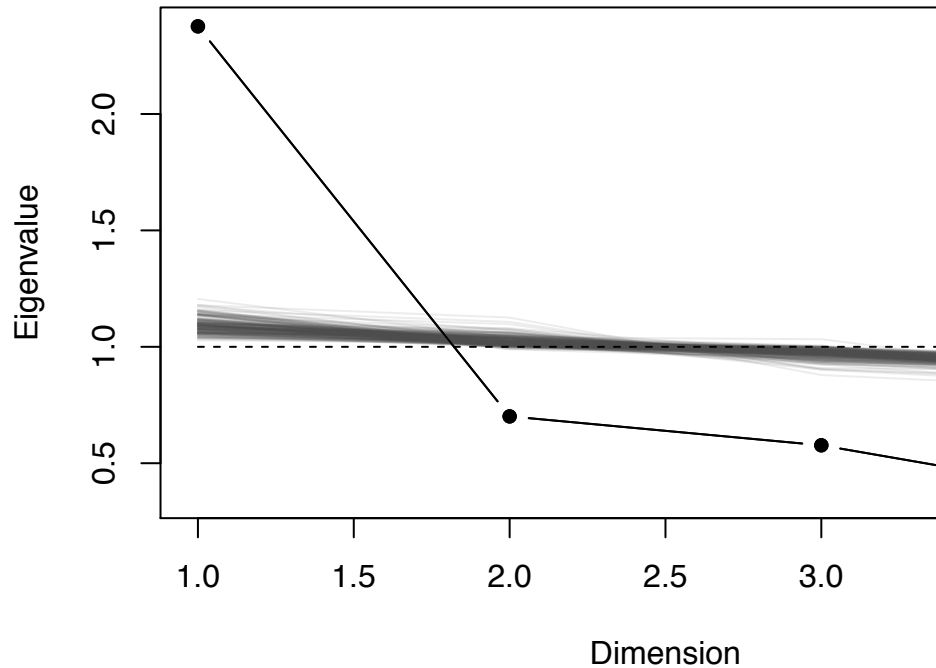

### Unidimensionality: Trauma Reaction

```
## [1] "Ratio of first to second eigenvalues: 3.389"
```

```
## [1] 2.3764852 0.7011546 0.5770705 0.3452897
```

```
## Factor Analysis using method = minres
```

```
## Call: fa(r = grm_obj$X)
```

```
## Standardized loadings (pattern matrix) based upon correlation matrix
```

```
##      MR1  h2  u2 com
```

```
## Q111 0.85 0.72 0.28  1
```

```
## Q110 0.63 0.39 0.61  1
```

```
## Q113 0.50 0.25 0.75  1
```

```
## Q112 0.73 0.54 0.46  1
```

```
##
```

```
##              MR1
```

```
## SS loadings  1.90
```

```
## Proportion Var 0.48
```

```
##
```

```
## Mean item complexity = 1
```

```
## Test of the hypothesis that 1 factor is sufficient.
```

```
##
```

```
## The degrees of freedom for the null model are 6 and the objective function was 1.1 with Chi Square
```

```
## The degrees of freedom for the model are 2 and the objective function was 0.01
```

```
##
```

```
## The root mean square of the residuals (RMSR) is 0.02
```

```
## The df corrected root mean square of the residuals is 0.03
```

```
##
```

```
## The harmonic number of observations is 523 with the empirical chi square 2.36 with prob < 0.31
```

```
## The total number of observations was 596 with Likelihood Chi Square = 4.66 with prob < 0.097
```

```
##
```

```
## Tucker Lewis Index of factoring reliability = 0.988
```

```
## RMSEA index = 0.047 and the 90 % confidence intervals are 0 0.105
```

```

## BIC = -8.12
## Fit based upon off diagonal values = 1
## Measures of factor score adequacy
##
## Correlation of (regression) scores with factors      MR1
## Multiple R square of scores with factors            0.82
## Minimum correlation of possible factor scores       0.65

```

**Graded-Response Model: Trauma Reaction**

| ##      | Extrmt1 | Extrmt2 | Extrmt3 | Extrmt4 | Extrmt5 | Extrmt6 | Dscrmm |
|---------|---------|---------|---------|---------|---------|---------|--------|
| ## Q111 | -0.398  | 0.096   | 0.479   | 0.822   | 1.209   | 1.571   | 3.163  |
| ## Q110 | -0.053  | 0.464   | 0.895   | 1.200   | 1.629   | 2.074   | 1.660  |
| ## Q113 | -1.071  | -0.434  | 0.089   | 0.527   | 1.173   | 1.971   | 1.053  |
| ## Q112 | -0.185  | 0.252   | 0.617   | 0.999   | 1.277   | 1.668   | 2.444  |

**Test Information Function**

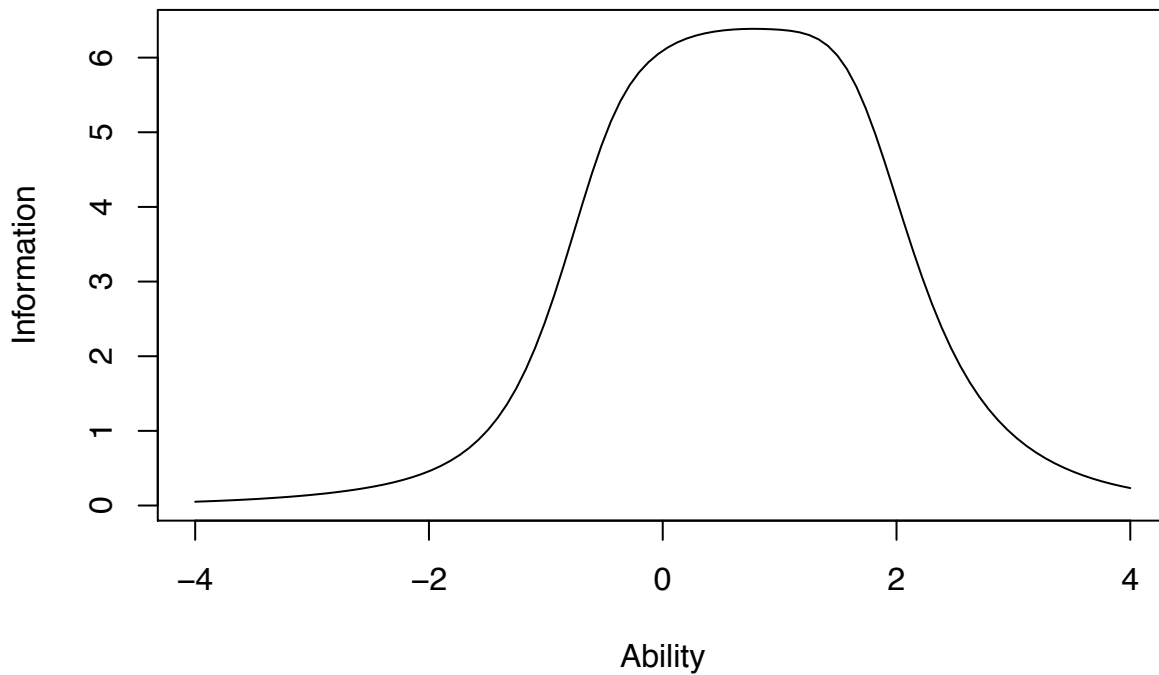

## Item Information Curves

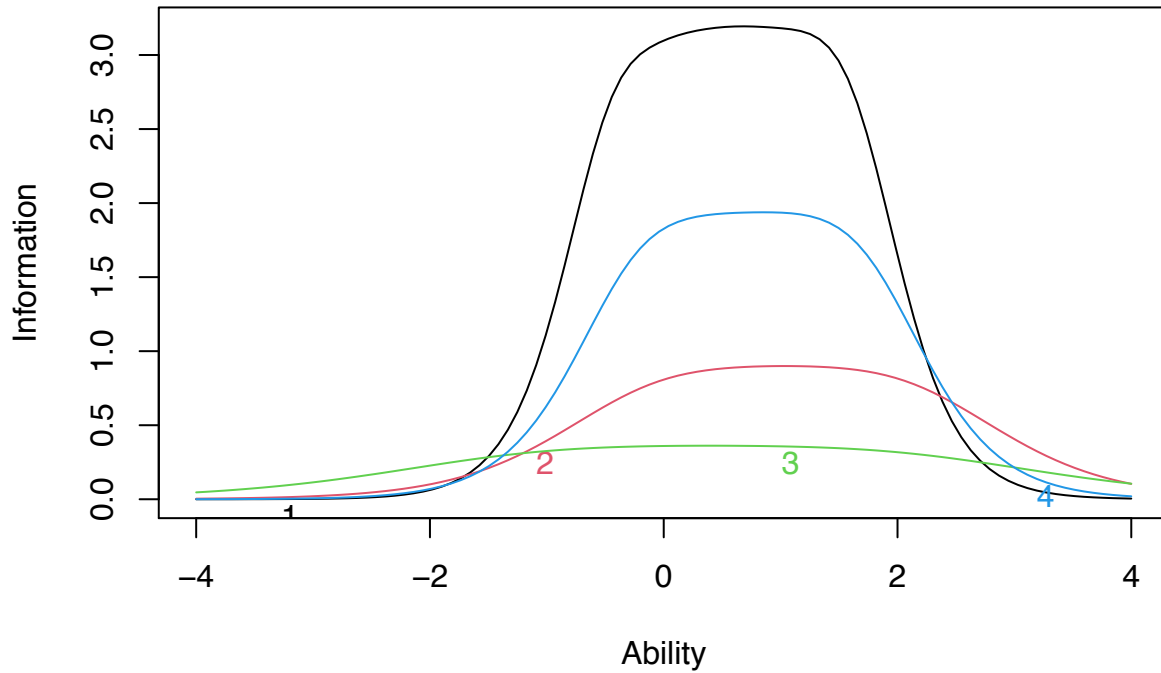

Back to top

### Site DIF

```
## Call:
## lordif::lordif(resp.data = as.data.frame(merged_data), group = site)
##
## Number of DIF groups: 2
##
## Number of items flagged for DIF: 1 of 4
##
## Items flagged: 4
##
## Number of iterations for purification: 2 of 10
##
## Detection criterion: Chisqr
##
## Threshold: alpha = 0.01
##
## item ncat chi12 chi13 chi23
## 1 1 7 0.7018 0.9287 0.9720
## 2 2 7 0.2885 0.5013 0.6140
## 3 3 7 0.0312 0.0718 0.4292
## 4 4 7 0.0007 0.0022 0.3627
```

### Trait Distributions

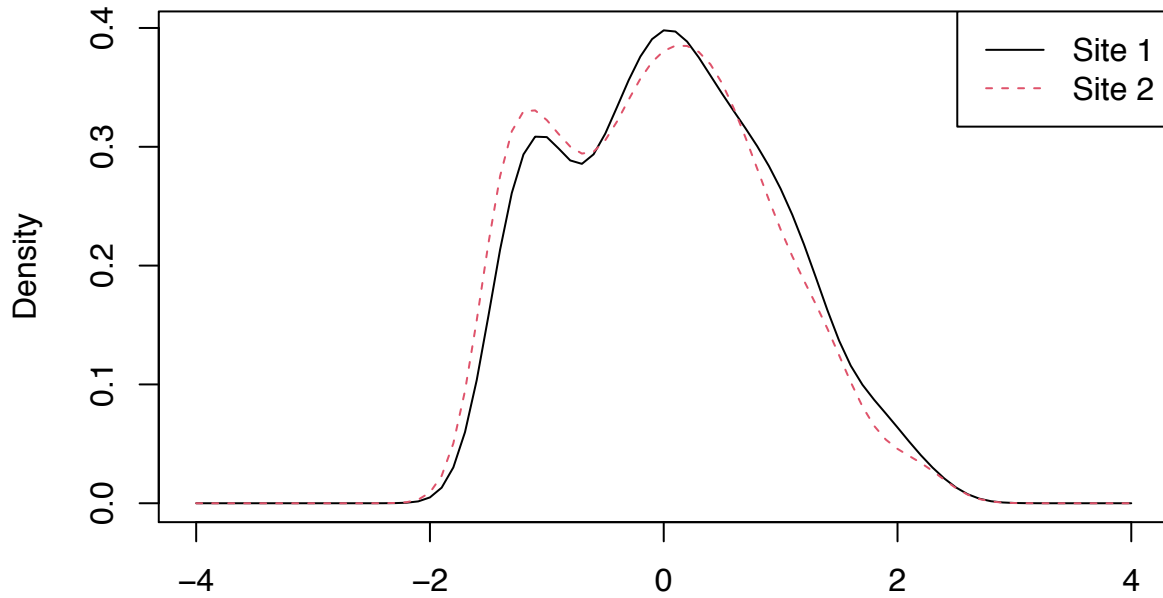

### Item True Score Functions – Item 4

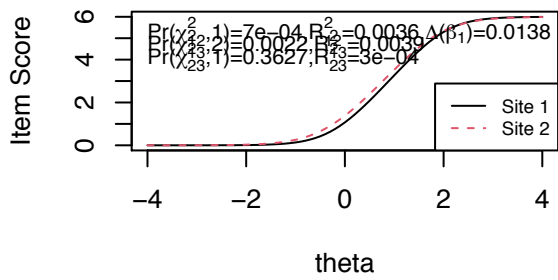

### Differences in Item True Score Function

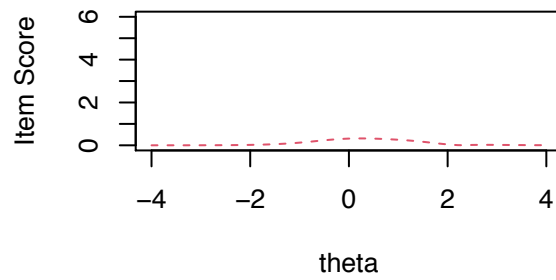

### Item Response Functions

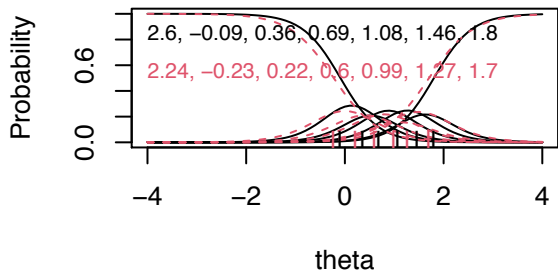

### Impact (Weighted by Density)

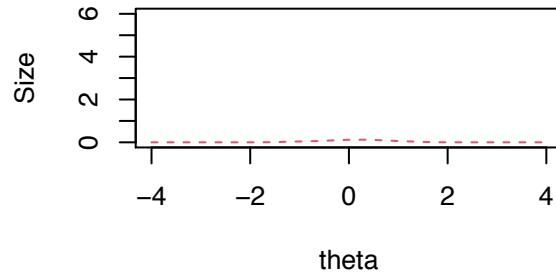

**All Items**

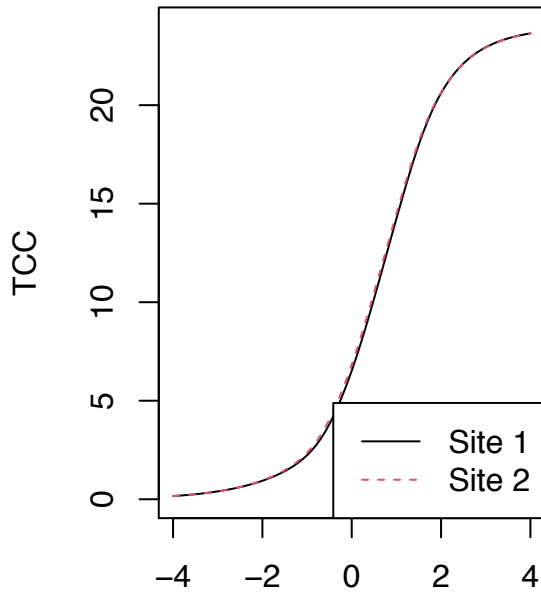

**DIF Items**

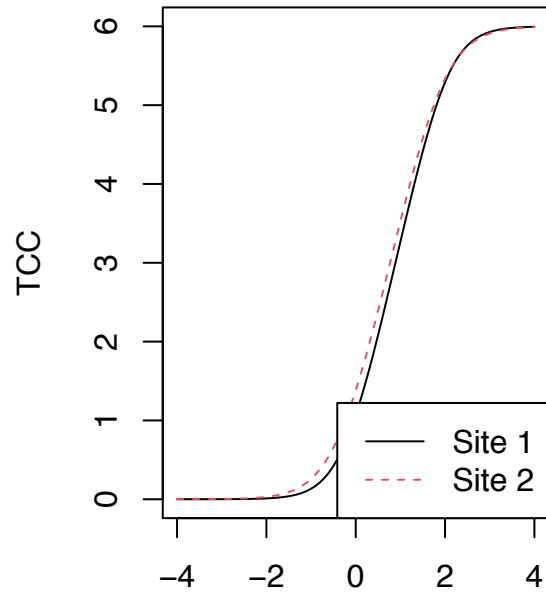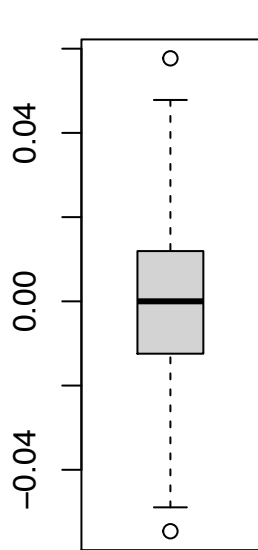

theta

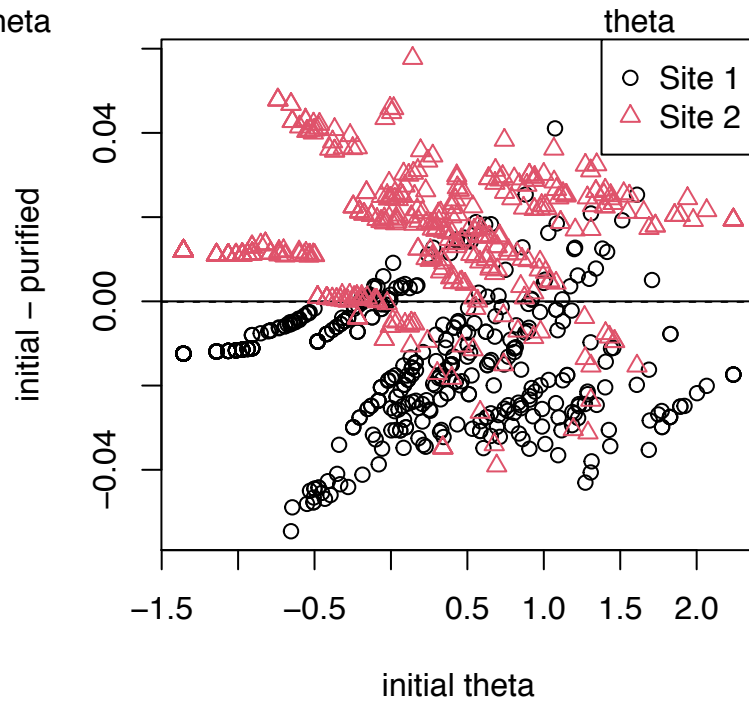

theta

[Back to top](#)

### Gender-based DIF: Trauma Reaction

```
## Call:  
## lordif::lordif(resp.data = as.data.frame(sex.data), group = sex)  
##  
## Number of DIF groups: 2
```



```
##
## Number of items flagged for DIF: 1 of 4
##
## Items flagged: 4
##
## Number of iterations for purification: 2 of 10
##
## Detection criterion: Chisqr
##
## Threshold: alpha = 0.01
##
## item ncat chi12 chi13 chi23
## 1 1 7 0.3398 0.6171 0.8158
## 2 2 7 0.1989 0.2936 0.3708
## 3 3 7 0.1562 0.3659 0.9837
## 4 4 7 0.0005 0.0011 0.2069
```

### Trait Distributions

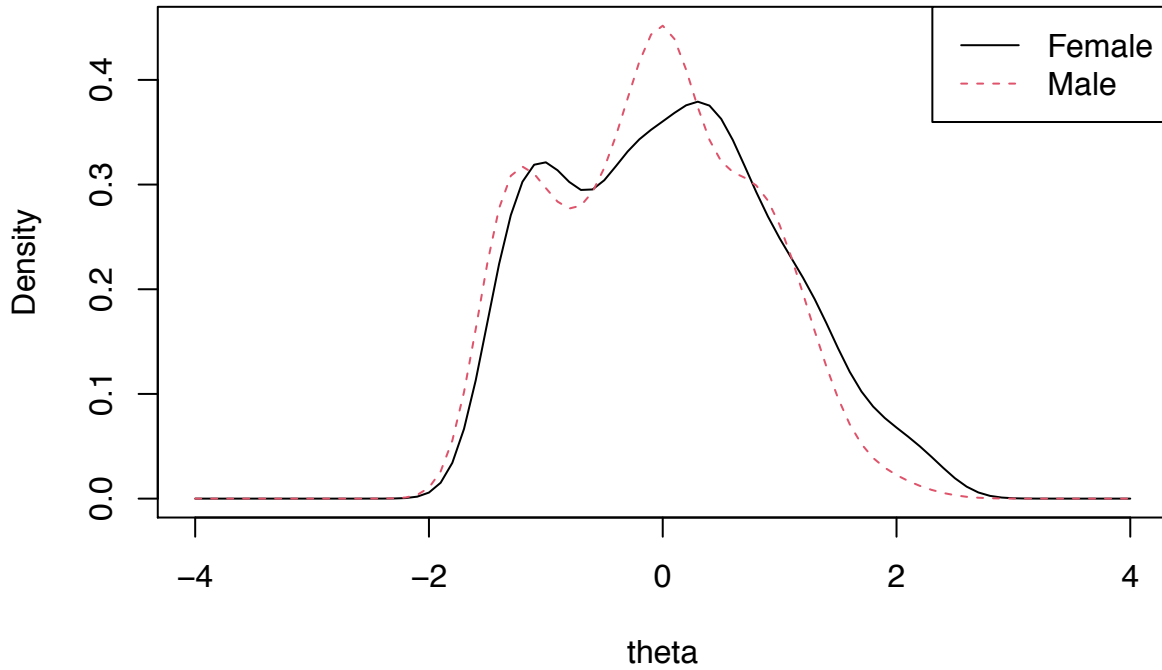

### Item True Score Functions – Item 4

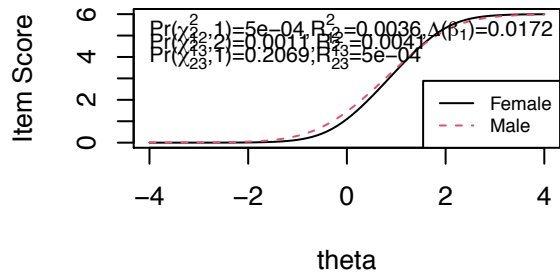

### Differences in Item True Score Function

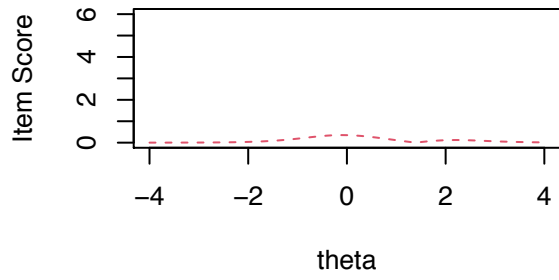

### Item Response Functions

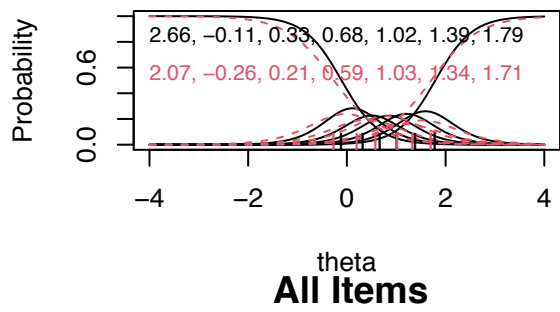

### Impact (Weighted by Density)

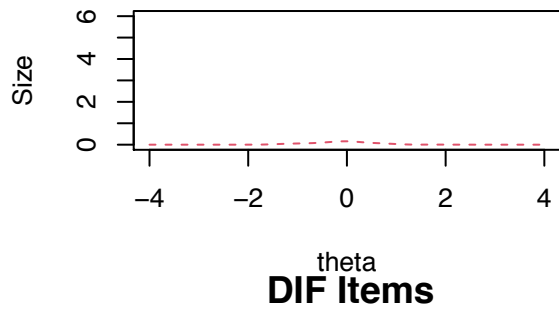

### All Items

### DIF Items

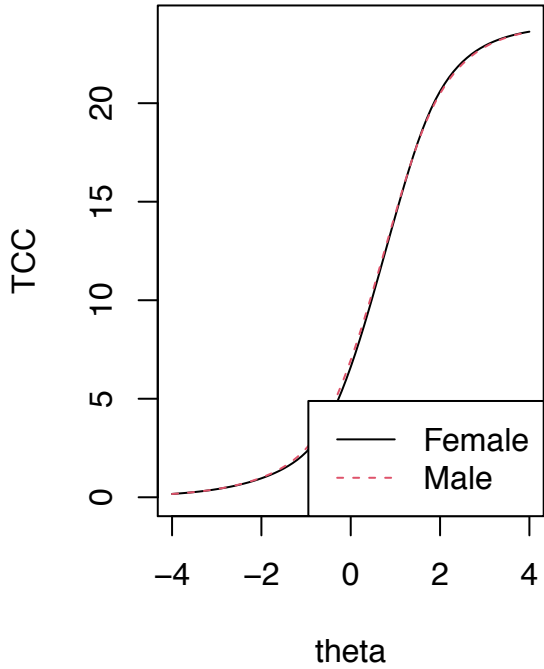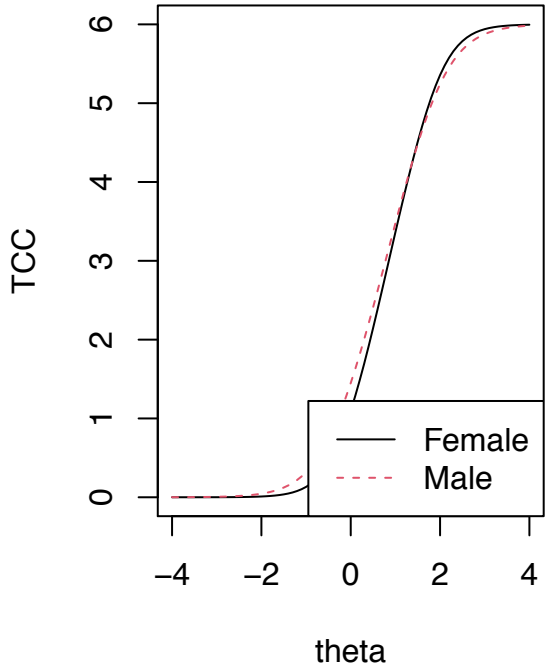

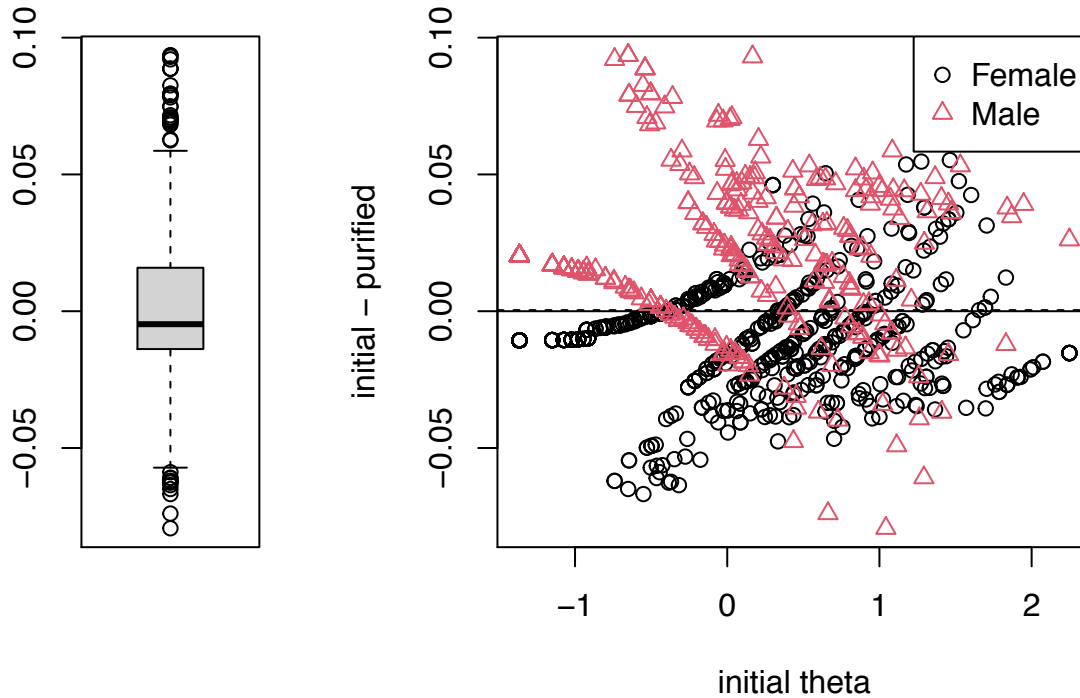

### Age-based DIF: Trauma Reaction

```
## Call:
## lordif::lordif(resp.data = as.data.frame(age.data), group = age)
##
## Number of DIF groups: 2
##
## Number of items flagged for DIF: 0 of 4
##
## Items flagged:
##
## Number of iterations for purification: 1 of 10
##
## Detection criterion: Chisqr
##
## Threshold: alpha = 0.01
```

Back to top

### Readiness for Recovery

Site 1

#### Reliability: Readiness for Recovery

```
## Cronbach's alpha is 0.407.
## Mean item-total correlation is 0.184.
## If each item were dropped:
##   raw_alpha std.alpha G6(smc) average_r S/N alpha se var.r med.r
## Q133      0.26      0.26      0.15      0.15 0.35  0.059  NA  0.15
```

```
## Q134    0.23    0.24    0.13    0.13 0.31    0.060    NA    0.13
## Q135    0.42    0.42    0.27    0.27 0.73    0.046    NA    0.27
```

### Scree Plot

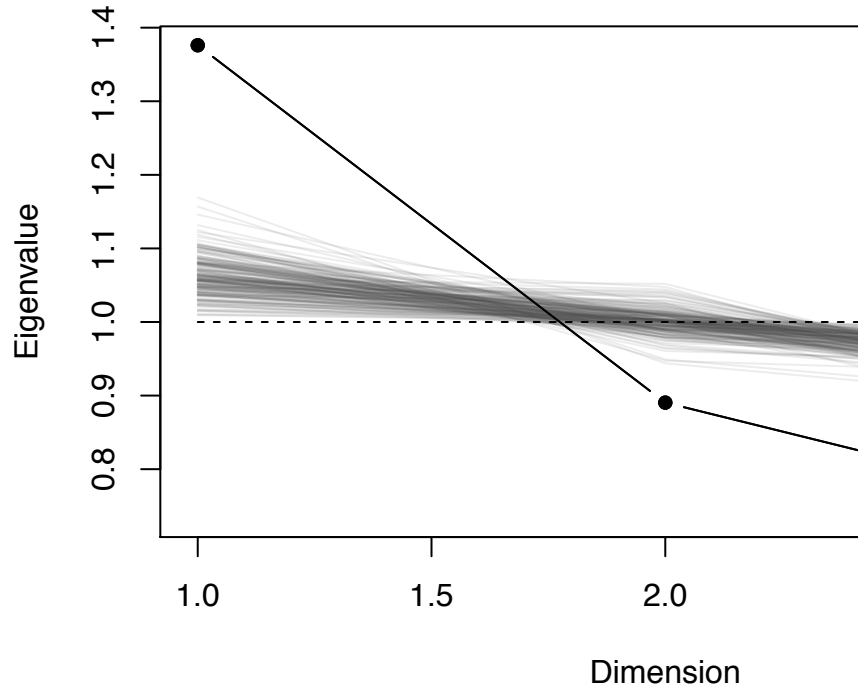

### Unidimensionality: Readiness for Recovery

```
## [1] "Ratio of first to second eigenvalues: 1.545"
## [1] 1.3761048 0.8904652 0.7334300
## Factor Analysis using method = minres
## Call: fa(r = grm_obj$X)
## Standardized loadings (pattern matrix) based upon correlation matrix
##      MR1    h2    u2 com
## Q133 0.49 0.240 0.76  1
## Q134 0.54 0.295 0.70  1
## Q135 0.28 0.078 0.92  1
##
##              MR1
## SS loadings  0.61
## Proportion Var 0.20
##
## Mean item complexity = 1
## Test of the hypothesis that 1 factor is sufficient.
##
## The degrees of freedom for the null model are 3 and the objective function was 0.11 with Chi Squa
## The degrees of freedom for the model are 0 and the objective function was 0
##
## The root mean square of the residuals (RMSR) is 0
## The df corrected root mean square of the residuals is NA
##
## The harmonic number of observations is 580 with the empirical chi square 0 with prob < NA
## The total number of observations was 617 with Likelihood Chi Square = 0 with prob < NA
```

```

##
## Tucker Lewis Index of factoring reliability = -Inf
## Fit based upon off diagonal values = 1
## Measures of factor score adequacy
##
##                                     MR1
## Correlation of (regression) scores with factors    0.67
## Multiple R square of scores with factors          0.45
## Minimum correlation of possible factor scores     -0.10

```

**Graded-Response Model: Readiness for Recovery**

|         | Extrmt1 | Extrmt2 | Extrmt3 | Extrmt4 | Extrmt5 | Extrmt6 | Dscrmm |
|---------|---------|---------|---------|---------|---------|---------|--------|
| ## Q133 | -2.029  | -1.128  | -0.294  | 0.608   | 1.356   | 2.535   | 1.149  |
| ## Q134 | -3.394  | -2.757  | -1.904  | -1.095  | -0.297  | 0.674   | 1.158  |
| ## Q135 | -0.409  | 1.377   | 2.911   | 5.159   | 7.875   | 11.332  | 0.475  |

**Test Information Function**

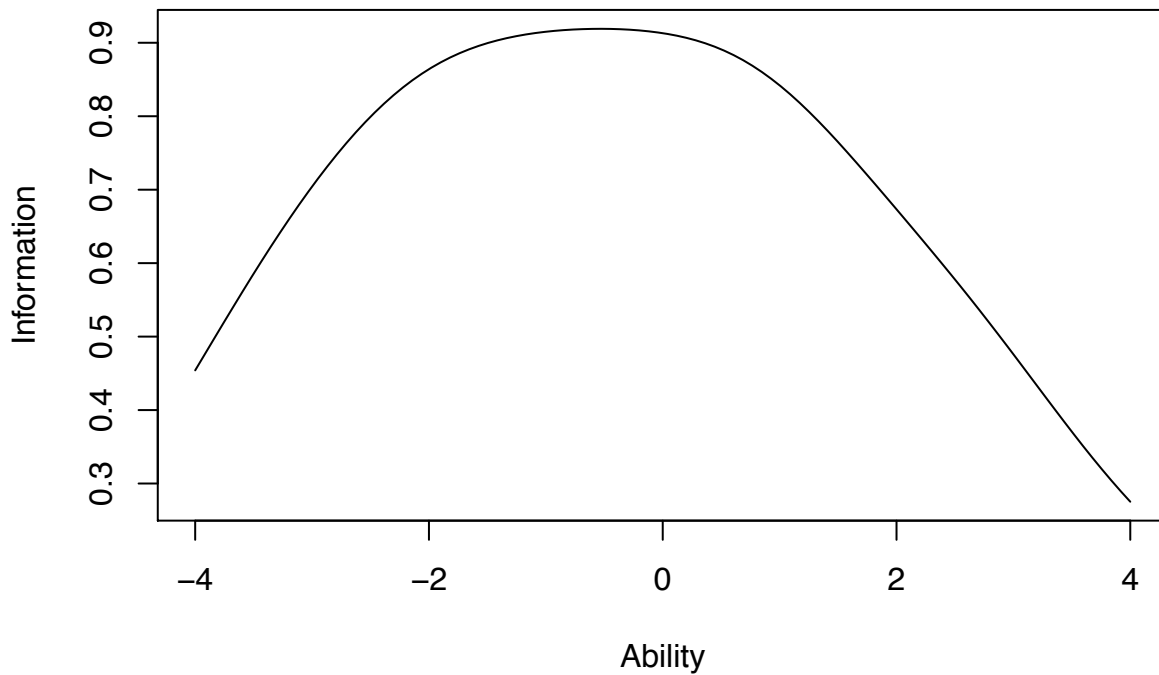

## Item Information Curves

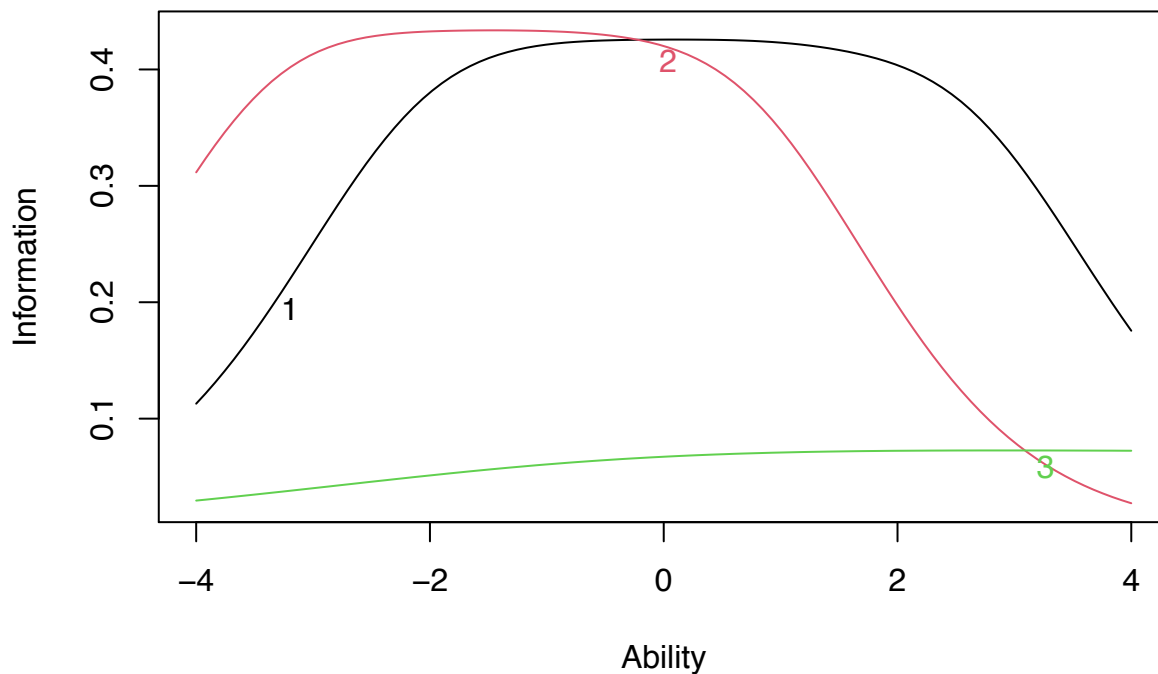

Back to top

### Site 2

#### Reliability: Readiness for Recovery

## Cronbach's alpha is 0.441.

## Mean item-total correlation is 0.205.

## If each item were dropped:

| ##      | raw_alpha | std.alpha | G6(smc) | average_r | S/N  | alpha | se | var.r | med.r |
|---------|-----------|-----------|---------|-----------|------|-------|----|-------|-------|
| ## Q133 | 0.20      | 0.20      | 0.11    | 0.11      | 0.25 | 0.065 | NA | 0.11  |       |
| ## Q134 | 0.31      | 0.31      | 0.19    | 0.19      | 0.45 | 0.056 | NA | 0.19  |       |
| ## Q135 | 0.48      | 0.48      | 0.32    | 0.32      | 0.94 | 0.042 | NA | 0.32  |       |

## Scree Plot

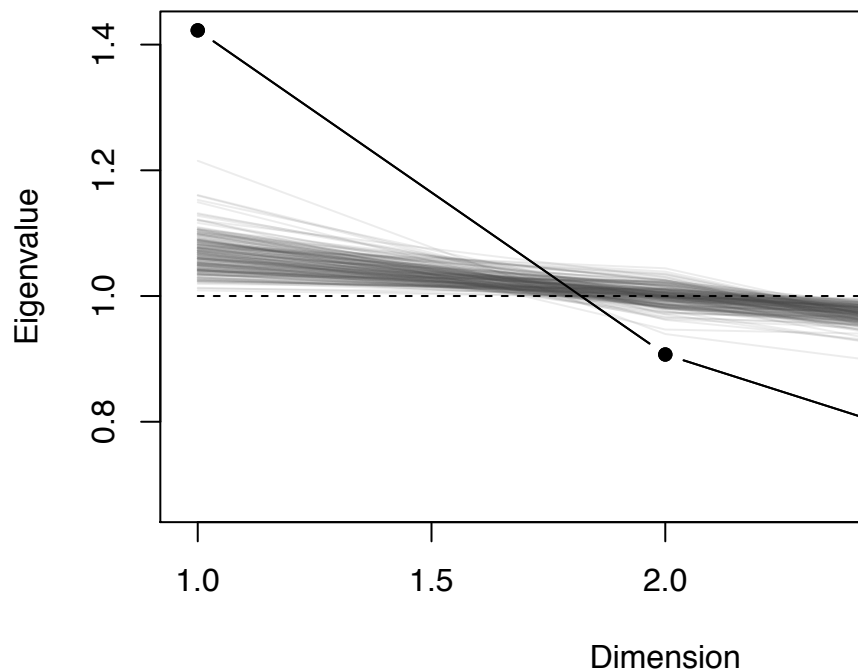

### Unidimensionality: Readiness for Recovery

## [1] "Ratio of first to second eigenvalues: 1.569"

## [1] 1.4226754 0.9069711 0.6703535

## Factor Analysis using method = minres

## Call: fa(r = grm\_obj\$X)

## Standardized loadings (pattern matrix) based upon correlation matrix

##       MR1    h2    u2 com

## Q133 0.73 0.537 0.46  1

## Q134 0.44 0.189 0.81  1

## Q135 0.25 0.064 0.94  1

##

##                   MR1

## SS loadings       0.79

## Proportion Var 0.26

##

## Mean item complexity = 1

## Test of the hypothesis that 1 factor is sufficient.

##

## The degrees of freedom for the null model are 3 and the objective function was 0.15 with Chi Square

## The degrees of freedom for the model are 0 and the objective function was 0

##

## The root mean square of the residuals (RMSR) is 0

## The df corrected root mean square of the residuals is NA

##

## The harmonic number of observations is 565 with the empirical chi square 0 with prob < NA

## The total number of observations was 596 with Likelihood Chi Square = 0 with prob < NA

##

## Tucker Lewis Index of factoring reliability = -Inf

## Fit based upon off diagonal values = 1

## Measures of factor score adequacy

```
##                                     MR1
## Correlation of (regression) scores with factors  0.77
## Multiple R square of scores with factors        0.59
## Minimum correlation of possible factor scores   0.19
```

**Graded-Response Model: Readiness for Recovery**

```
##      Extrmt1 Extrmt2 Extrmt3 Extrmt4 Extrmt5 Extrmt6 Dscrmm
## Q133 -1.403  -0.678  -0.008   0.751   1.598   2.670   1.594
## Q134 -3.089  -2.412  -1.619  -0.687   0.049   1.237   1.008
## Q135  0.079   1.181   2.381   4.147   5.219   7.678   0.573
```

**Test Information Function**

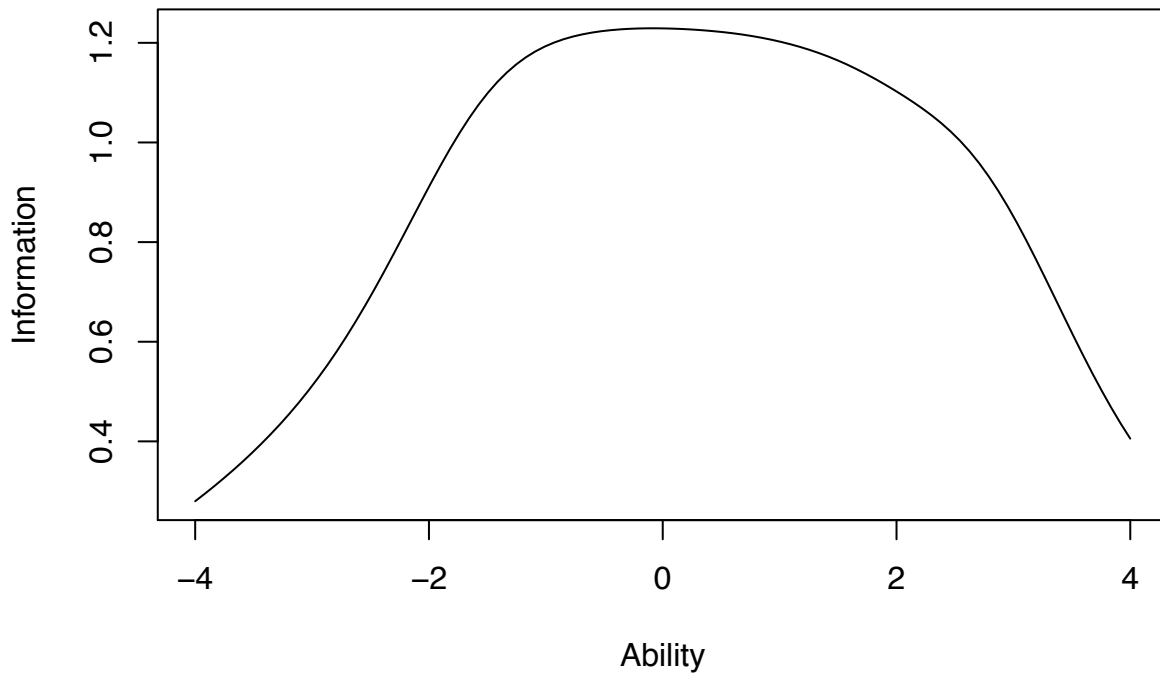



## Item Information Curves

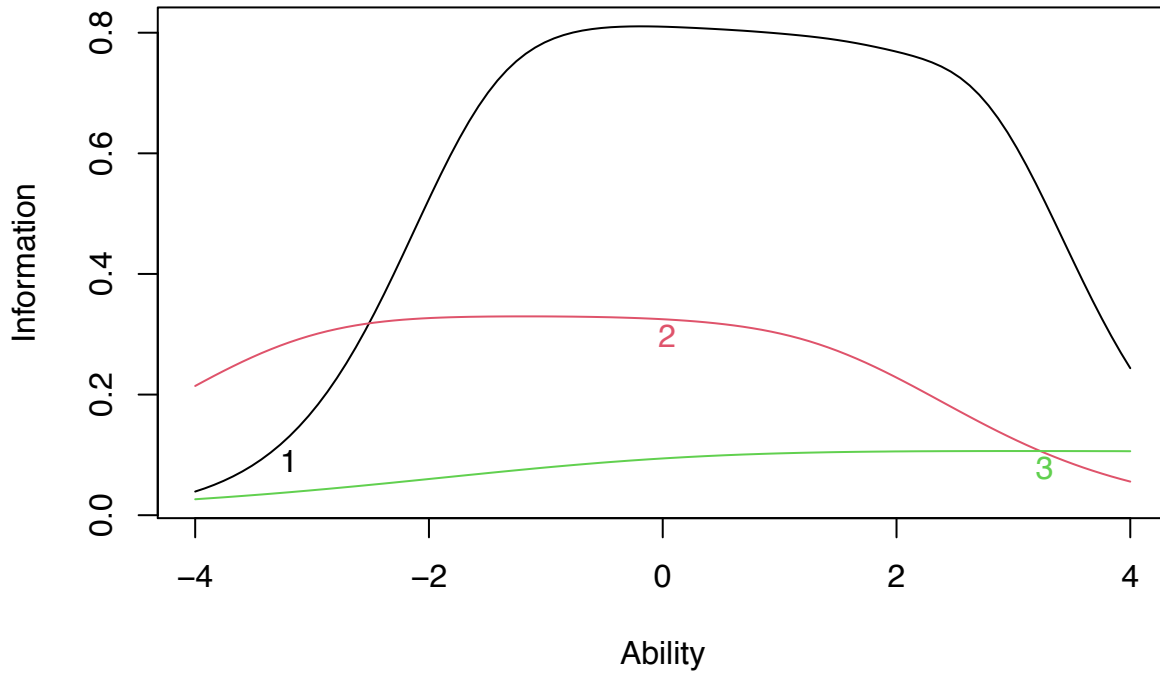

Back to top

### Gender-based DIF: Readiness for Recovery

## No Gender-based DIF detected

### Age-based DIF: Readiness for Recovery

## No age-based DIF detected

Back to top

## Recovery Environment

### Site 1

#### Reliability: Recovery Environment

## Cronbach's alpha is 0.643.

## Mean item-total correlation is 0.266.

## If each item were dropped:

| ##      | raw_alpha | std.alpha | G6(sm) | average_r | S/N | alpha | se      | var.r | med.r |
|---------|-----------|-----------|--------|-----------|-----|-------|---------|-------|-------|
| ## Q80  | 0.60      | 0.60      | 0.53   | 0.27      | 1.5 | 0.026 | 0.00146 | 0.29  |       |
| ## Q136 | 0.58      | 0.58      | 0.51   | 0.26      | 1.4 | 0.027 | 0.00150 | 0.25  |       |
| ## Q138 | 0.60      | 0.60      | 0.53   | 0.27      | 1.5 | 0.026 | 0.00104 | 0.28  |       |
| ## Q139 | 0.60      | 0.60      | 0.53   | 0.27      | 1.5 | 0.026 | 0.00114 | 0.29  |       |
| ## Q137 | 0.58      | 0.58      | 0.51   | 0.26      | 1.4 | 0.028 | 0.00091 | 0.25  |       |

## Scree Plot

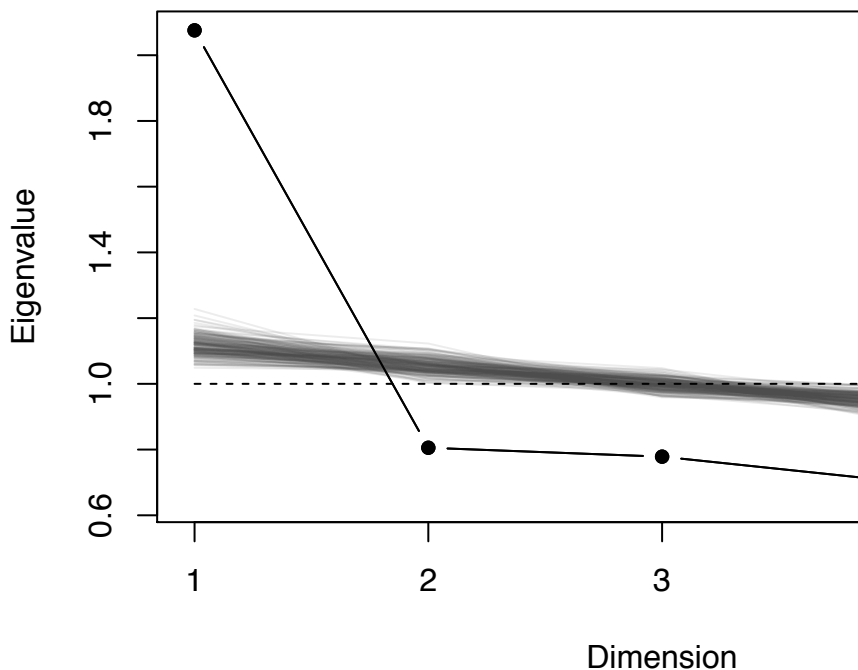

### Unidimensionality: Recovery Environment

```
## [1] "Ratio of first to second eigenvalues: 2.577"
```

```
## [1] 2.0756735 0.8055102 0.7783887 0.7037467 0.6366809
```

```
## Factor Analysis using method = minres
```

```
## Call: fa(r = grm_obj$X)
```

```
## Standardized loadings (pattern matrix) based upon correlation matrix
```

```
##      MR1  h2  u2 com
```

```
## Q80  0.50 0.25 0.75  1
```

```
## Q136 0.55 0.30 0.70  1
```

```
## Q138 0.50 0.25 0.75  1
```

```
## Q139 0.49 0.24 0.76  1
```

```
## Q137 0.56 0.31 0.69  1
```

```
##
```

```
##              MR1
```

```
## SS loadings  1.35
```

```
## Proportion Var 0.27
```

```
##
```

```
## Mean item complexity = 1
```

```
## Test of the hypothesis that 1 factor is sufficient.
```

```
##
```

```
## The degrees of freedom for the null model are 10 and the objective function was 0.54 with Chi Square
```

```
## The degrees of freedom for the model are 5 and the objective function was 0.01
```

```
##
```

```
## The root mean square of the residuals (RMSR) is 0.03
```

```
## The df corrected root mean square of the residuals is 0.04
```

```
##
```

```
## The harmonic number of observations is 563 with the empirical chi square 8.11 with prob < 0.15
```

```
## The total number of observations was 617 with Likelihood Chi Square = 8.49 with prob < 0.13
```

```
##
```

```
## Tucker Lewis Index of factoring reliability = 0.978
```

```

## RMSEA index = 0.034 and the 90 % confidence intervals are 0 0.071
## BIC = -23.63
## Fit based upon off diagonal values = 0.99
## Measures of factor score adequacy
##
## Correlation of (regression) scores with factors MR1 0.81
## Multiple R square of scores with factors 0.65
## Minimum correlation of possible factor scores 0.30

```

**Graded-Response Model: Recovery Environment**

| ##      | Extrmt1 | Extrmt2 | Extrmt3 | Extrmt4 | Extrmt5 | Extrmt6 | Dscrmn |
|---------|---------|---------|---------|---------|---------|---------|--------|
| ## Q80  | -0.614  | 0.120   | 0.776   | 1.468   | 2.287   | 3.476   | 1.159  |
| ## Q136 | -1.205  | -0.343  | 0.400   | 1.261   | 1.952   | 2.840   | 1.253  |
| ## Q138 | -1.023  | -0.359  | 0.218   | 0.902   | 1.580   | 2.352   | 1.134  |
| ## Q139 | -1.797  | -0.837  | 0.121   | 1.015   | 1.883   | 2.990   | 1.085  |
| ## Q137 | -0.230  | 0.285   | 0.683   | 1.085   | 1.551   | 2.060   | 1.419  |

**Test Information Function**

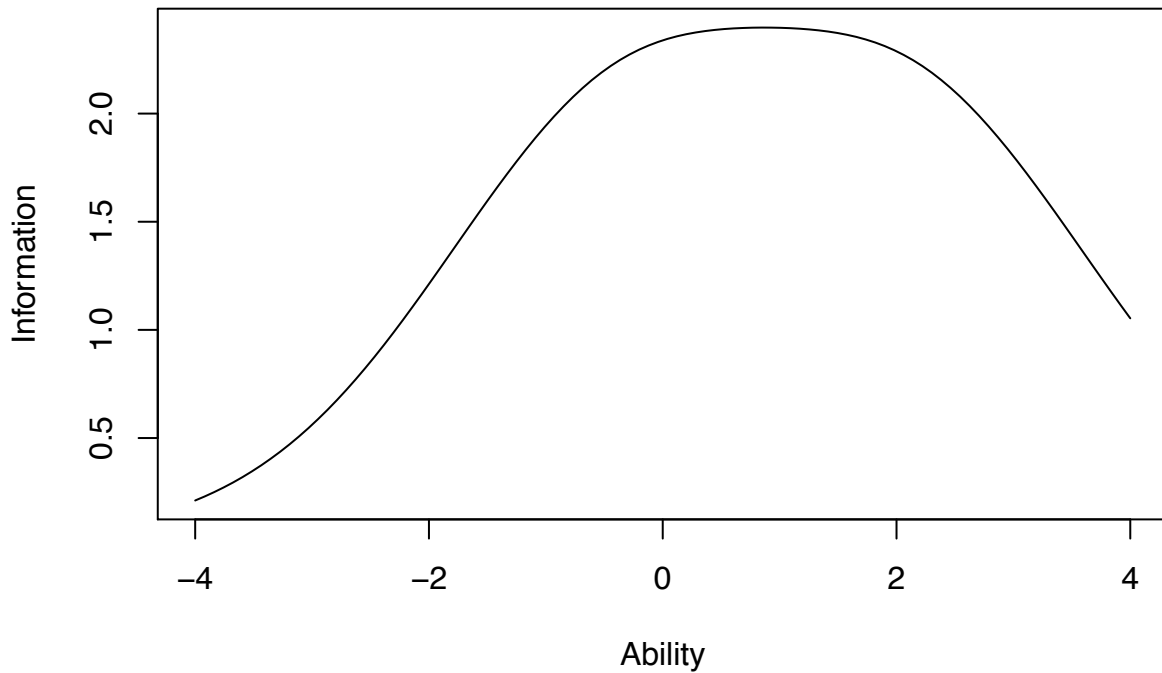

## Item Information Curves

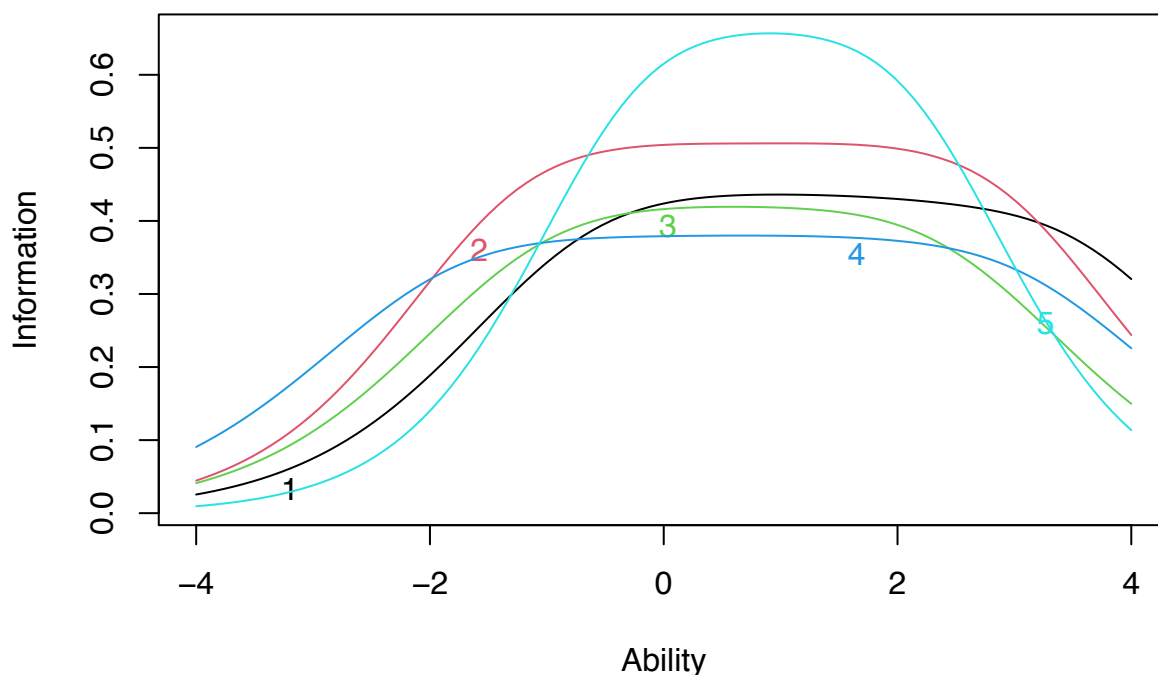

Back to top

### Site 2

#### Reliability: Recovery Environment

## Cronbach's alpha is 0.633.

## Mean item-total correlation is 0.261.

## If each item were dropped:

| ##      | raw_alpha | std.alpha | G6(smc) | average_r | S/N | alpha se | var.r  | med.r |
|---------|-----------|-----------|---------|-----------|-----|----------|--------|-------|
| ## Q80  | 0.58      | 0.58      | 0.52    | 0.26      | 1.4 | 0.028    | 0.0051 | 0.24  |
| ## Q136 | 0.56      | 0.56      | 0.50    | 0.24      | 1.3 | 0.029    | 0.0028 | 0.23  |
| ## Q138 | 0.58      | 0.59      | 0.53    | 0.26      | 1.4 | 0.028    | 0.0074 | 0.26  |
| ## Q139 | 0.56      | 0.57      | 0.50    | 0.25      | 1.3 | 0.029    | 0.0040 | 0.25  |
| ## Q137 | 0.61      | 0.62      | 0.55    | 0.29      | 1.6 | 0.026    | 0.0036 | 0.28  |

## Scree Plot

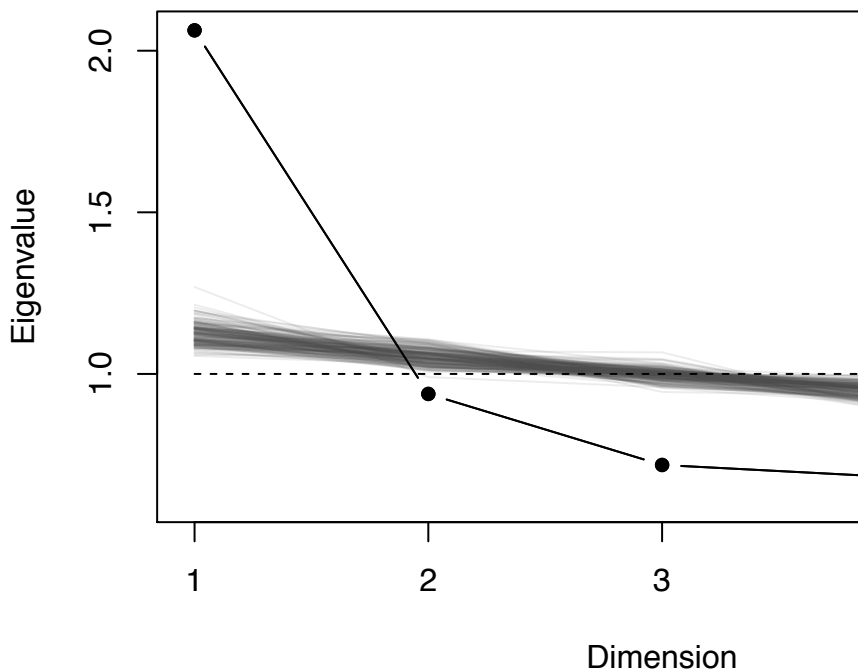

### Unidimensionality: Recovery Environment

```
## [1] "Ratio of first to second eigenvalues: 2.199"
```

```
## [1] 2.0630248 0.9381012 0.7182923 0.6806631 0.5999186
```

```
## Factor Analysis using method = minres
```

```
## Call: fa(r = grm_obj$X)
```

```
## Standardized loadings (pattern matrix) based upon correlation matrix
```

```
##      MR1  h2  u2 com
```

```
## Q80  0.52 0.28 0.72  1
```

```
## Q136 0.60 0.36 0.64  1
```

```
## Q138 0.47 0.22 0.78  1
```

```
## Q139 0.59 0.34 0.66  1
```

```
## Q137 0.39 0.15 0.85  1
```

```
##
```

```
##              MR1
```

```
## SS loadings  1.35
```

```
## Proportion Var 0.27
```

```
##
```

```
## Mean item complexity = 1
```

```
## Test of the hypothesis that 1 factor is sufficient.
```

```
##
```

```
## The degrees of freedom for the null model are 10 and the objective function was 0.57 with Chi Square
```

```
## The degrees of freedom for the model are 5 and the objective function was 0.04
```

```
##
```

```
## The root mean square of the residuals (RMSR) is 0.05
```

```
## The df corrected root mean square of the residuals is 0.07
```

```
##
```

```
## The harmonic number of observations is 553 with the empirical chi square 24.85 with prob < 0.000
```

```
## The total number of observations was 596 with Likelihood Chi Square = 21.92 with prob < 0.00054
```

```
##
```

```
## Tucker Lewis Index of factoring reliability = 0.896
```

```

## RMSEA index = 0.075 and the 90 % confidence intervals are 0.045 0.109
## BIC = -10.03
## Fit based upon off diagonal values = 0.97
## Measures of factor score adequacy
##
## Correlation of (regression) scores with factors MR1 0.81
## Multiple R square of scores with factors 0.66
## Minimum correlation of possible factor scores 0.32

```

**Graded-Response Model: Recovery Environment**

| ##      | Extrmt1 | Extrmt2 | Extrmt3 | Extrmt4 | Extrmt5 | Extrmt6 | Dscrmn |
|---------|---------|---------|---------|---------|---------|---------|--------|
| ## Q80  | -0.381  | 0.306   | 0.868   | 1.594   | 2.202   | 3.160   | 1.317  |
| ## Q136 | -1.065  | -0.232  | 0.315   | 1.010   | 1.645   | 2.396   | 1.538  |
| ## Q138 | -0.739  | -0.077  | 0.524   | 1.088   | 1.624   | 2.394   | 1.032  |
| ## Q139 | -1.204  | -0.420  | 0.321   | 1.114   | 1.757   | 3.051   | 1.466  |
| ## Q137 | 0.189   | 0.778   | 1.179   | 1.752   | 2.435   | 3.055   | 0.892  |

**Test Information Function**

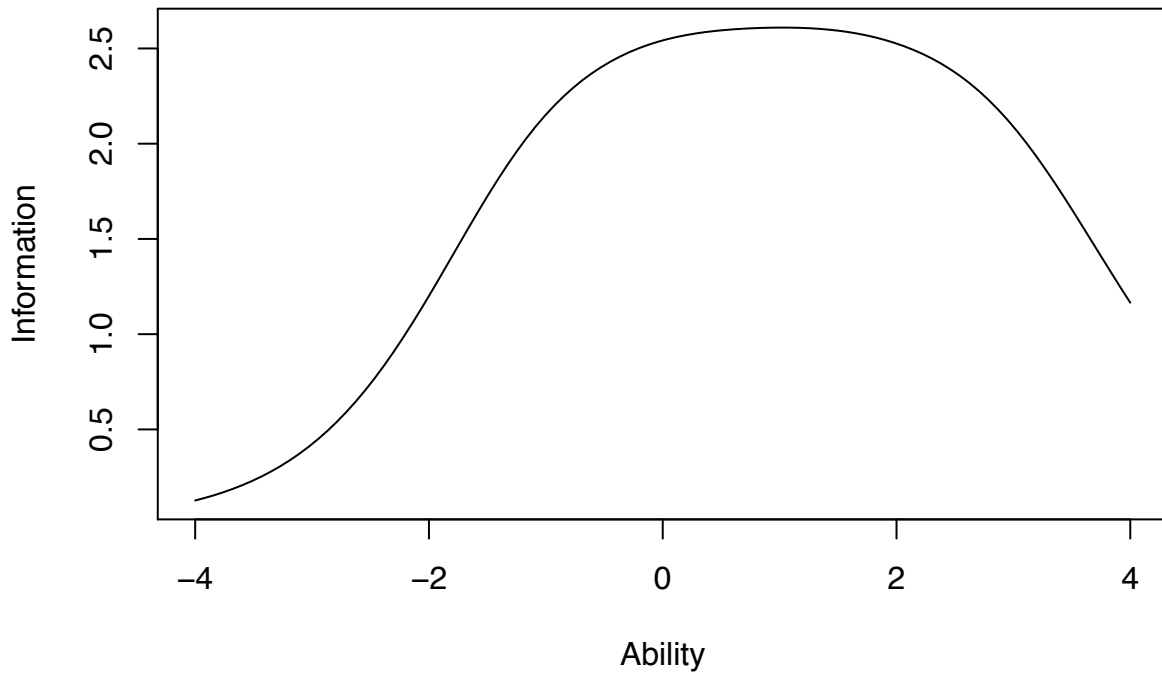

## Item Information Curves

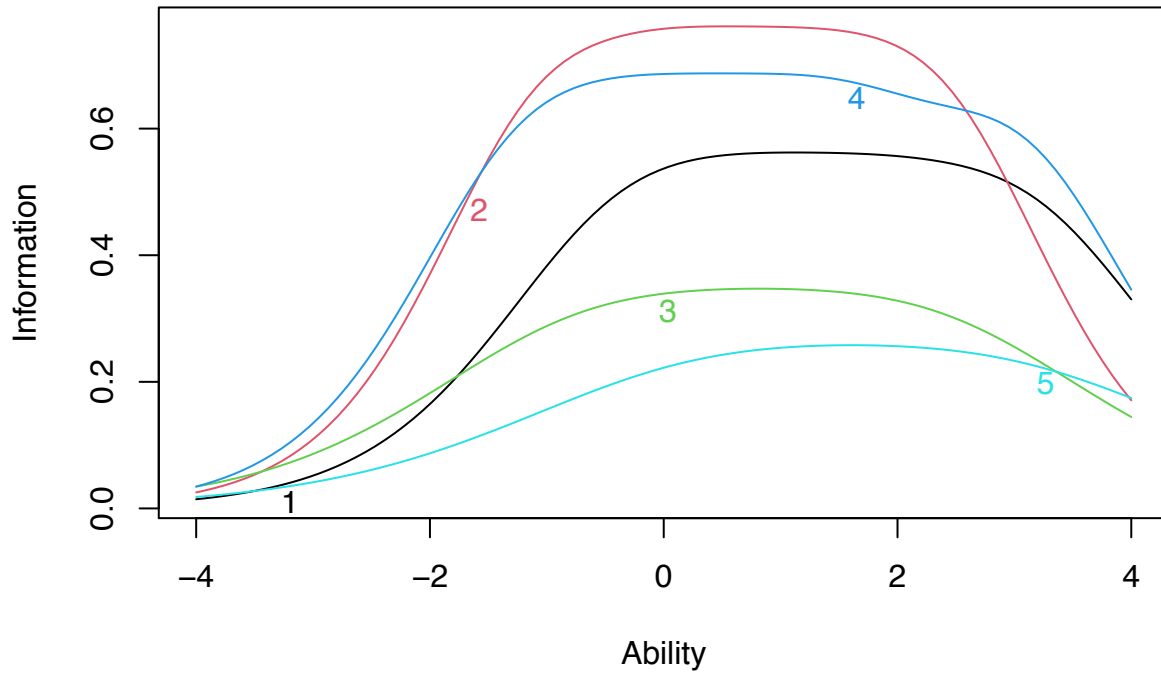

[Back to top](#)

### Site DIF

```
## Call:
## lordif::lordif(resp.data = as.data.frame(merged_data), group = site)
##
##   Number of DIF groups: 2
##
##   Number of items flagged for DIF: 0 of 5
##
##   Items flagged:
##
##   Number of iterations for purification: 1 of 10
##
##   Detection criterion: Chisqr
##
##   Threshold: alpha = 0.01
```

[Back to top](#)

### Gender-based DIF: Recovery Environment

```
## Call:
## lordif::lordif(resp.data = as.data.frame(sex.data), group = sex)
##
##   Number of DIF groups: 2
##
##   Number of items flagged for DIF: 2 of 5
```

```
##
## Items flagged: 3, 4
##
## Number of iterations for purification: 2 of 10
##
## Detection criterion: Chisqr
##
## Threshold: alpha = 0.01
##
## item ncat chi12 chi13 chi23
## 1 1 7 0.7349 0.7197 0.4611
## 2 2 7 0.7714 0.2528 0.1025
## 3 3 7 0.0000 0.0000 0.0021
## 4 4 7 0.0001 0.0006 0.7773
## 5 5 7 0.7025 0.9274 0.9449
```

### Trait Distributions

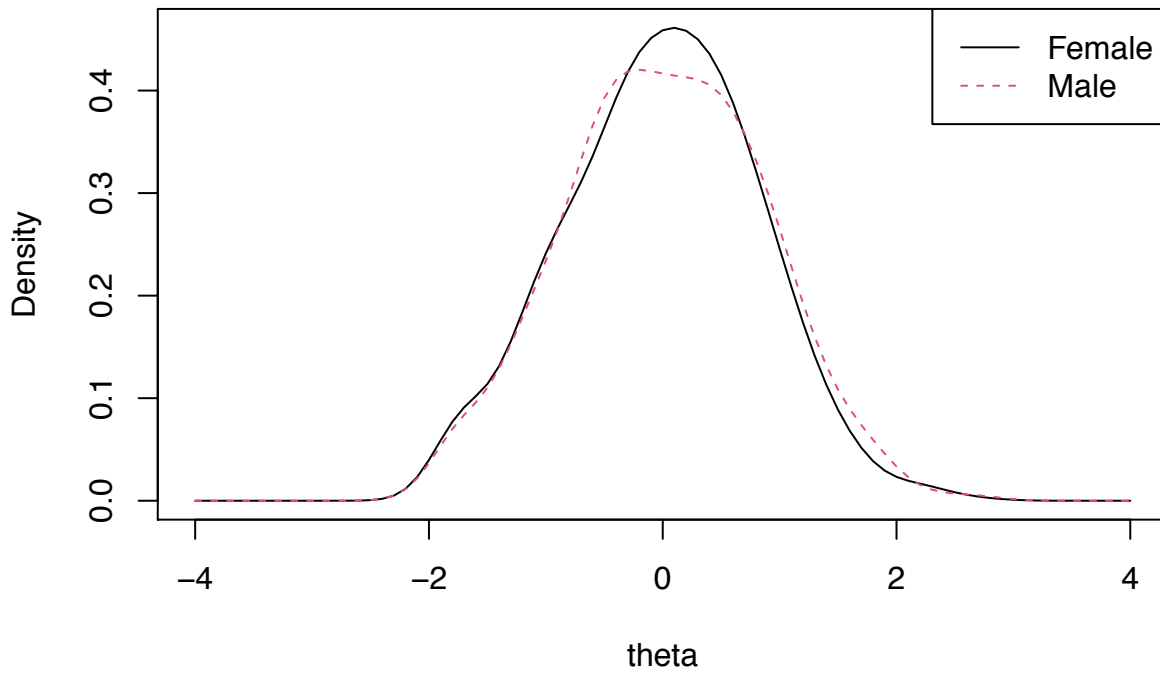



### Item True Score Functions – Item 3

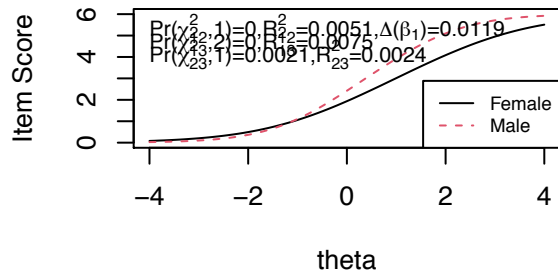

### Differences in Item True Score Function

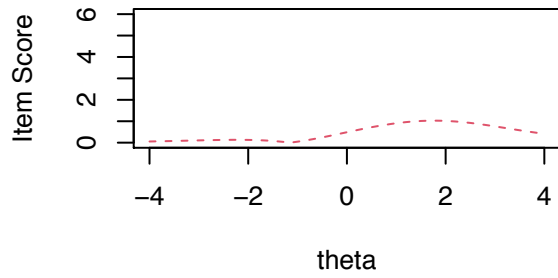

### Item Response Functions

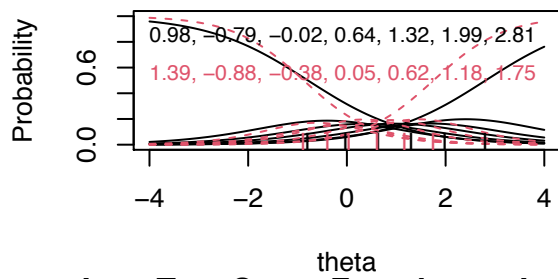

### Impact (Weighted by Density)

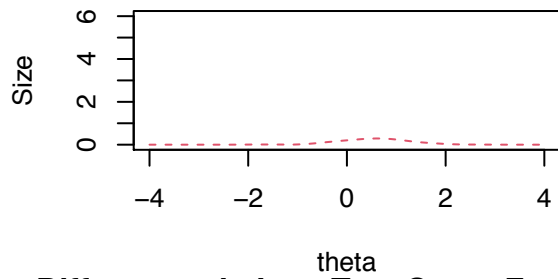

### Item True Score Functions – Item 4

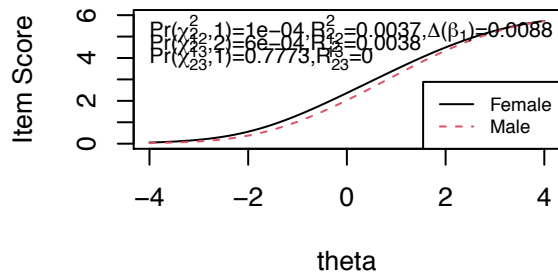

### Differences in Item True Score Function

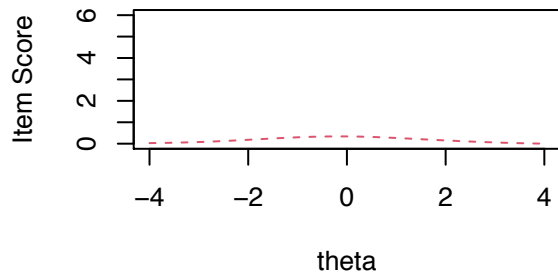

### Item Response Functions

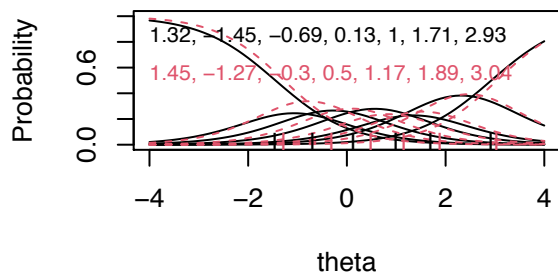

### Impact (Weighted by Density)

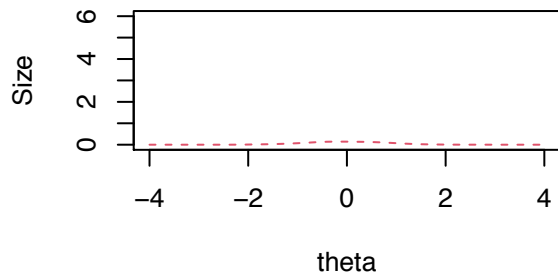

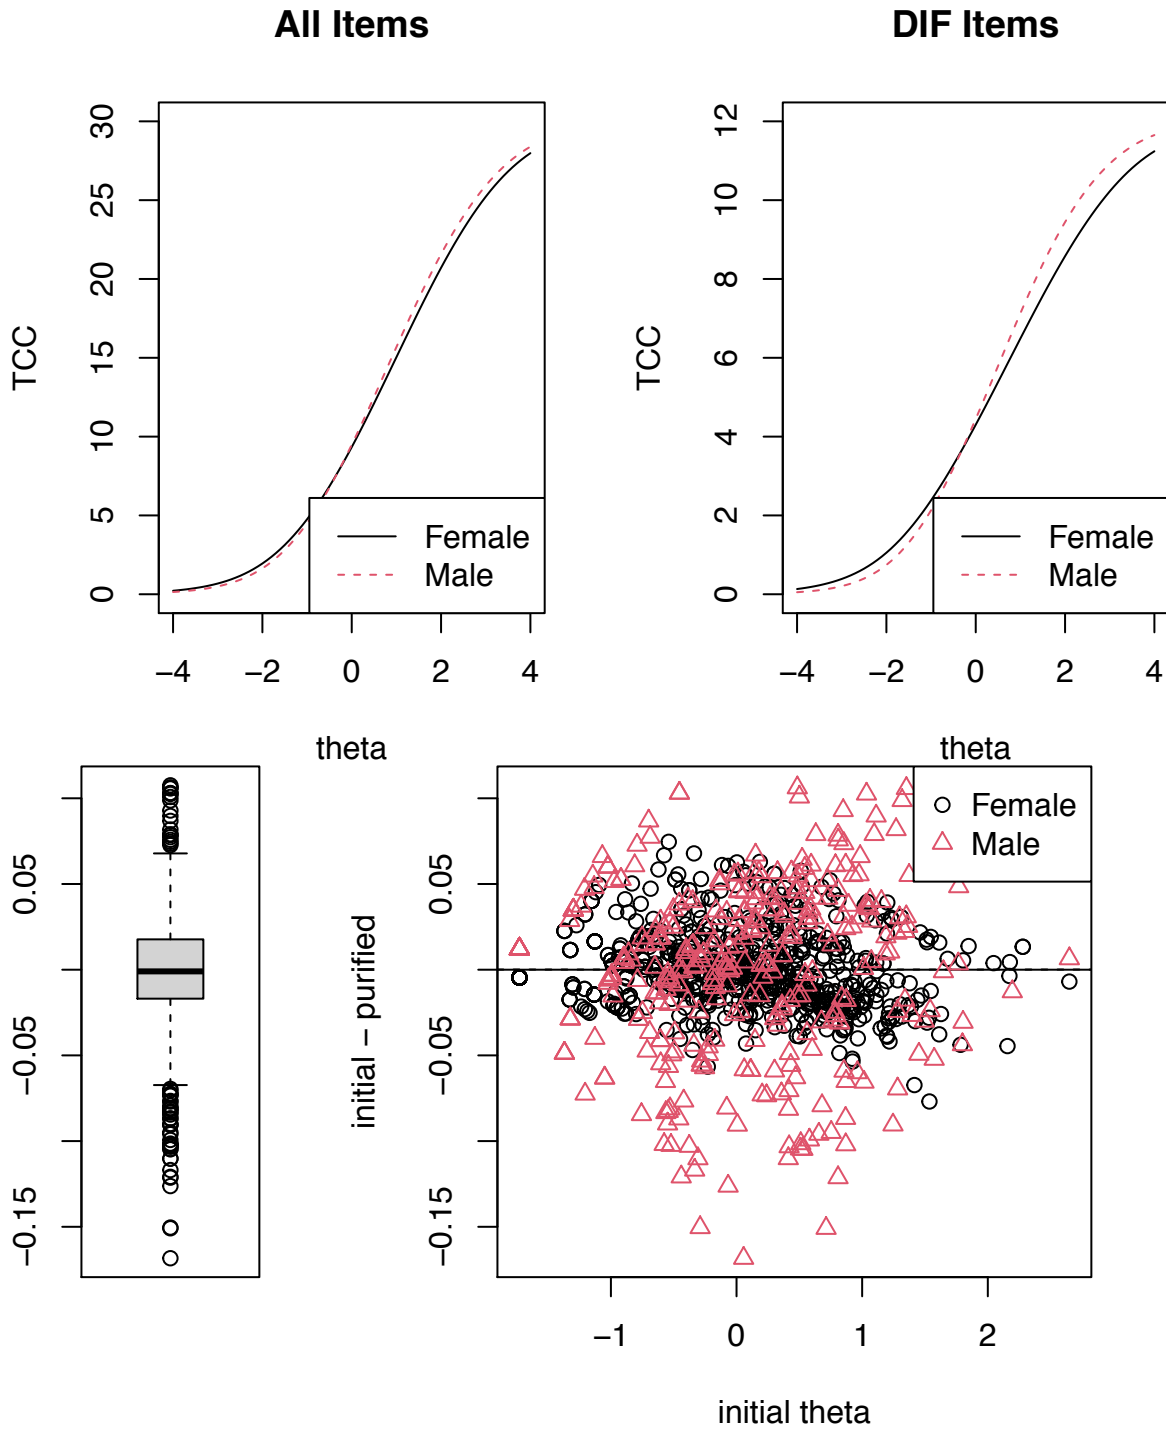

Age-based DIF: Recovery Environment

```
## Call:
## lordif::lordif(resp.data = as.data.frame(age.data), group = age)
##
## Number of DIF groups: 2
##
```

```
## Number of items flagged for DIF: 2 of 5
##
## Items flagged: 1, 3
##
## Number of iterations for purification: 2 of 10
##
## Detection criterion: Chisqr
##
## Threshold: alpha = 0.01
##
## item ncat chi12 chi13 chi23
## 1 1 7 0.0035 0.0103 0.4367
## 2 2 7 0.4265 0.7102 0.8199
## 3 3 7 0.0004 0.0000 0.0018
## 4 4 7 0.4924 0.7312 0.6940
## 5 5 7 0.9740 0.4214 0.1888
```

### Trait Distributions

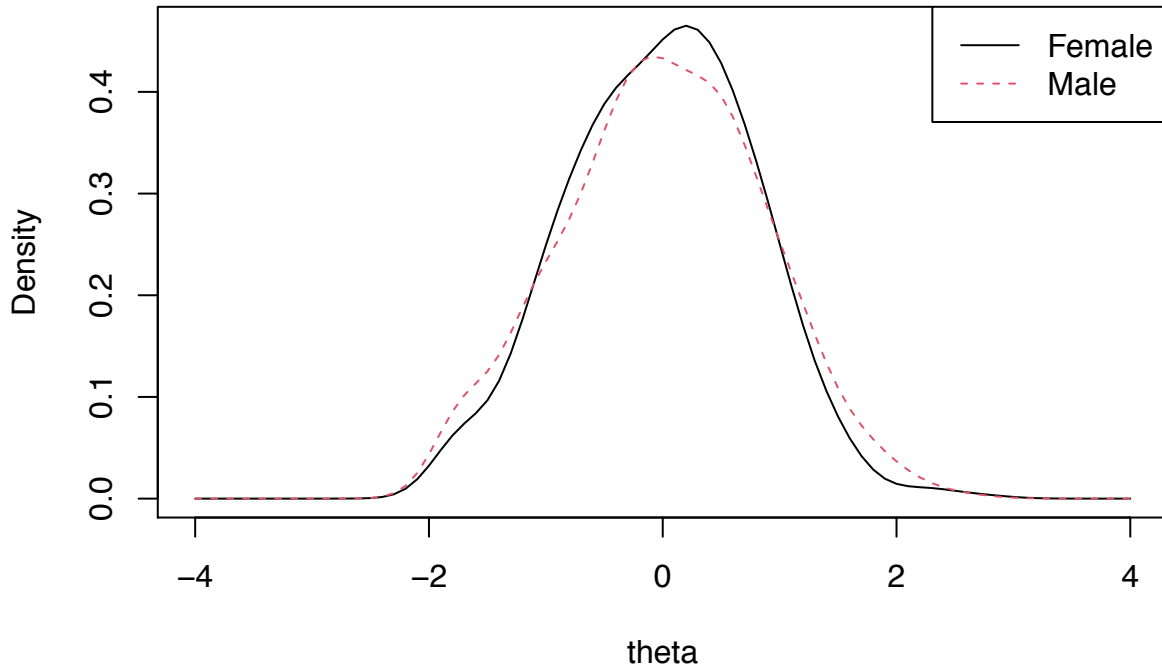

### Item True Score Functions – Item 1

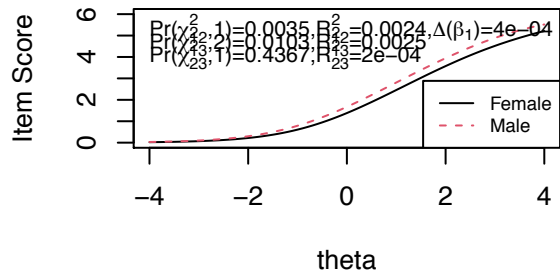

### Differences in Item True Score Function

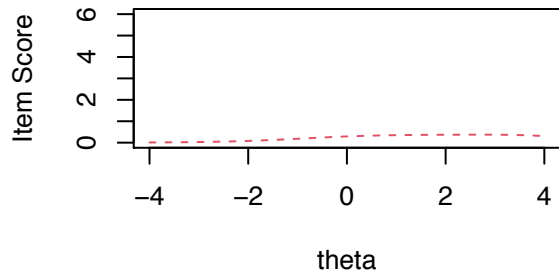

### Item Response Functions

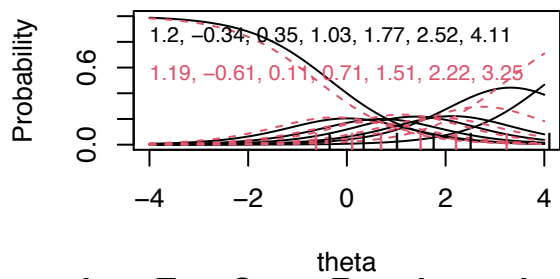

### Impact (Weighted by Density)

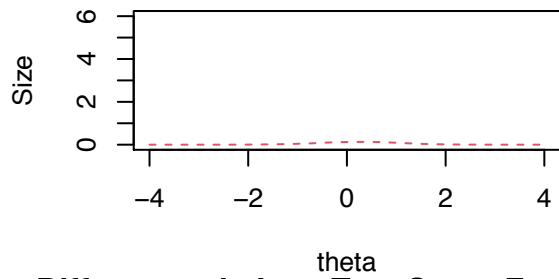

### Item True Score Functions – Item 3

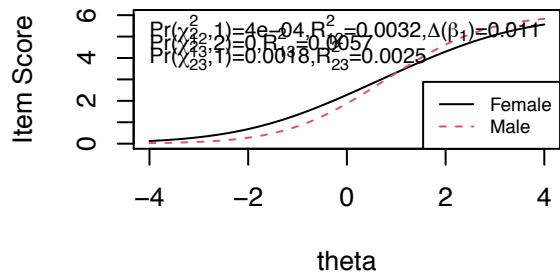

### Differences in Item True Score Function

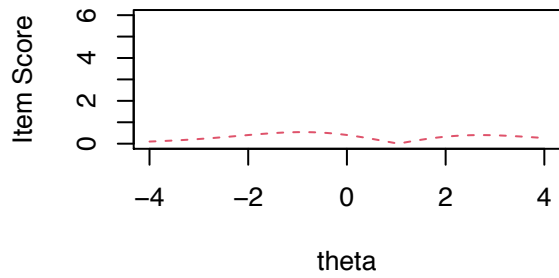

### Item Response Functions

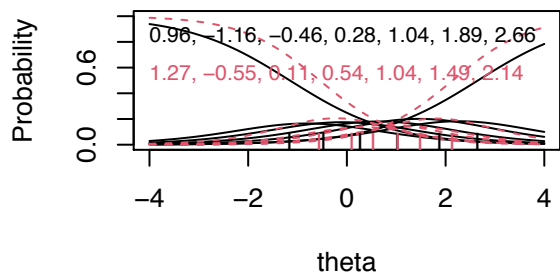

### Impact (Weighted by Density)

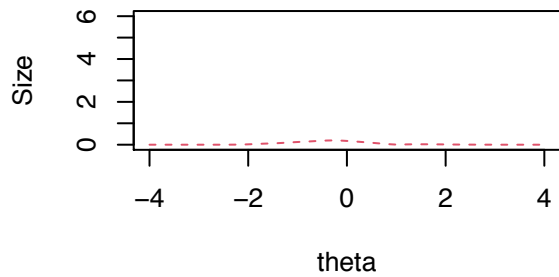

**All Items**

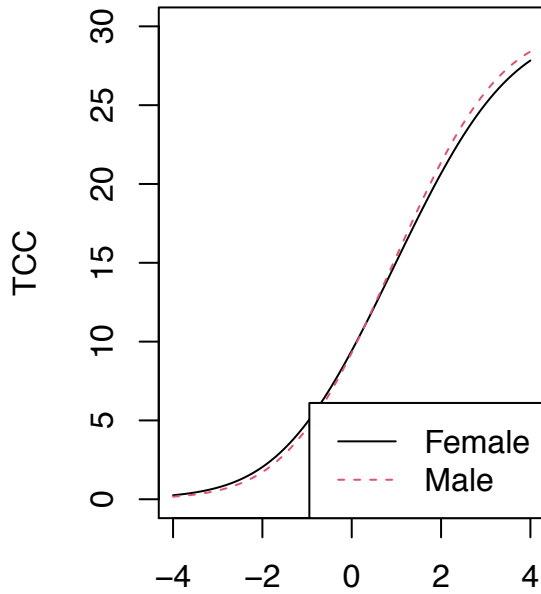

**DIF Items**

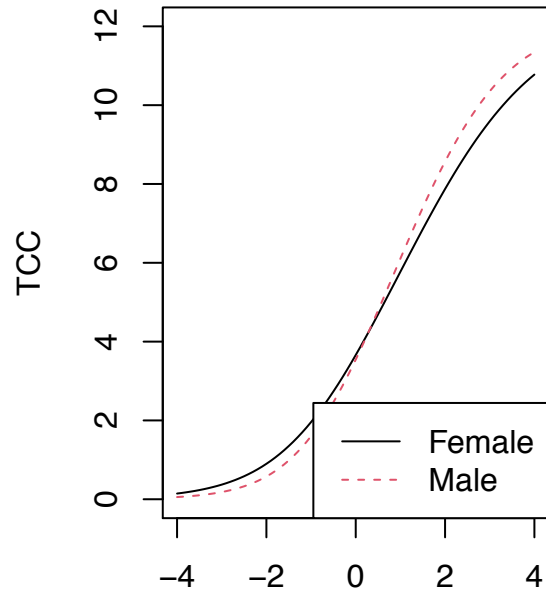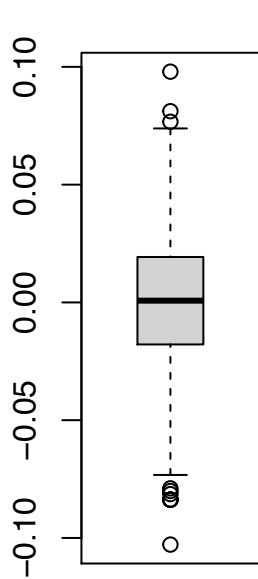

theta

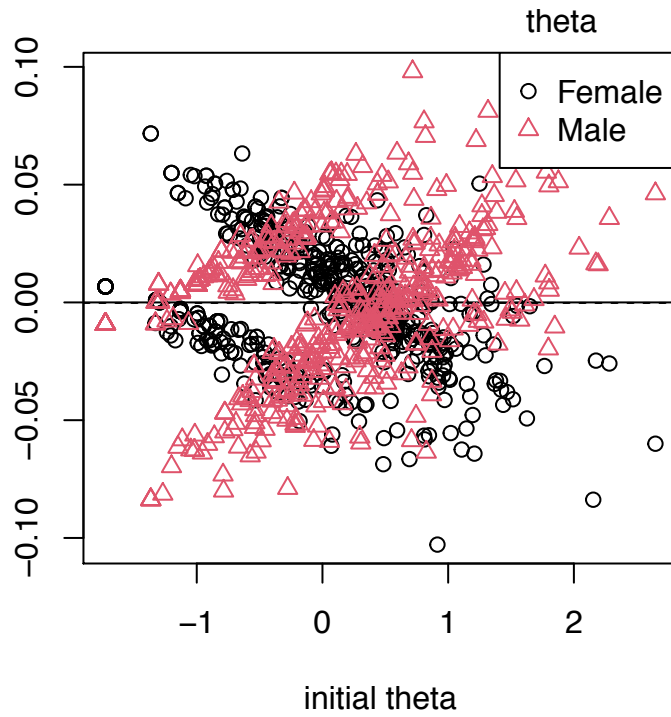

theta

[Back to top](#)

**Social Safety**

Site 1

Reliability: Social Safety

```

## Cronbach's alpha is 0.749.
## Mean item-total correlation is 0.335.
## If each item were dropped:
##      raw_alpha std.alpha G6(smc) average_r S/N alpha se  var.r med.r
## Q43      0.69      0.69   0.66      0.31 2.2   0.020 0.0106 0.31
## Q131     0.71      0.71   0.68      0.33 2.4   0.019 0.0138 0.36
## Q40      0.69      0.69   0.66      0.31 2.2   0.020 0.0111 0.31
## Q132     0.75      0.75   0.72      0.38 3.1   0.016 0.0067 0.38
## Q62      0.70      0.71   0.68      0.33 2.4   0.019 0.0121 0.32
## Q50      0.73      0.74   0.71      0.36 2.8   0.017 0.0106 0.38

```

### Scree Plot

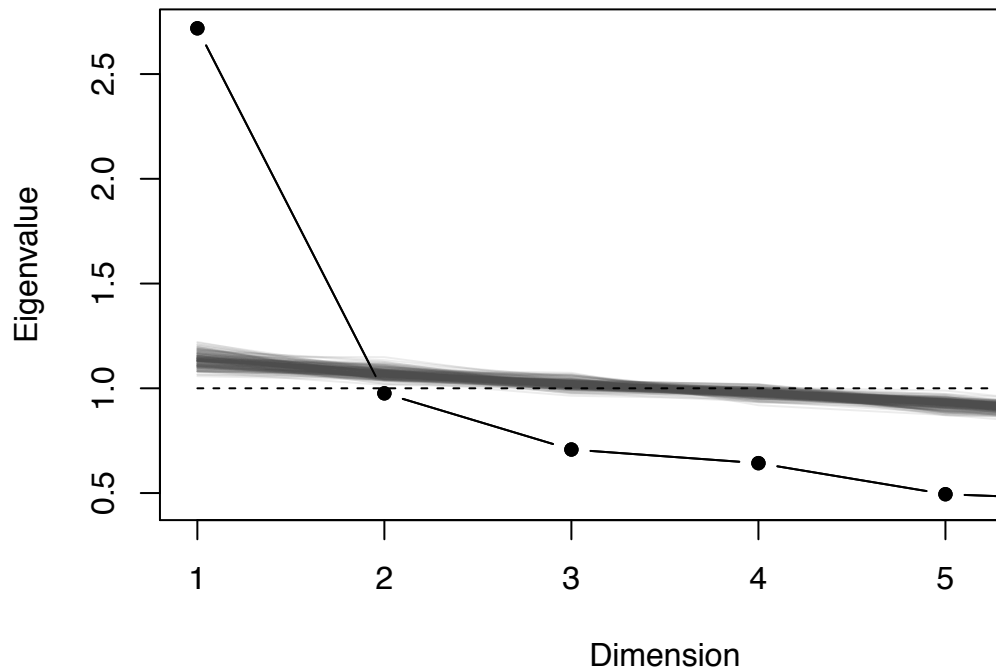

### Unidimensionality: Social Safety

```

## [1] "Ratio of first to second eigenvalues: 2.786"
## [1] 2.7184604 0.9758992 0.7076665 0.6426698 0.4942761 0.4610280
## Factor Analysis using method = minres
## Call: fa(r = grm_obj$X)
## Standardized loadings (pattern matrix) based upon correlation matrix
##      MR1  h2  u2 com
## Q43  0.71 0.50 0.50  1
## Q131 0.61 0.37 0.63  1
## Q40  0.68 0.46 0.54  1
## Q132 0.41 0.17 0.83  1
## Q62  0.62 0.38 0.62  1
## Q50  0.48 0.23 0.77  1
##
##              MR1
## SS loadings  2.10
## Proportion Var 0.35
##

```

```

## Mean item complexity = 1
## Test of the hypothesis that 1 factor is sufficient.
##
## The degrees of freedom for the null model are 15 and the objective function was 1.29 with Chi Squ
## The degrees of freedom for the model are 9 and the objective function was 0.12
##
## The root mean square of the residuals (RMSR) is 0.06
## The df corrected root mean square of the residuals is 0.08
##
## The harmonic number of observations is 586 with the empirical chi square 63.24 with prob < 3.2e-
## The total number of observations was 617 with Likelihood Chi Square = 71.46 with prob < 7.9e-12
##
## Tucker Lewis Index of factoring reliability = 0.866
## RMSEA index = 0.106 and the 90 % confidence intervals are 0.084 0.13
## BIC = 13.64
## Fit based upon off diagonal values = 0.97
## Measures of factor score adequacy
##
## Correlation of (regression) scores with factors MR1 0.88
## Multiple R square of scores with factors 0.78
## Minimum correlation of possible factor scores 0.56

```

#### Graded-Response Model: Social Safety

| ##      | Extrmt1 | Extrmt2 | Extrmt3 | Extrmt4 | Extrmt5 | Extrmt6 | Dscrmm |
|---------|---------|---------|---------|---------|---------|---------|--------|
| ## Q43  | -2.075  | -1.407  | -0.880  | -0.295  | 0.201   | 0.926   | 1.997  |
| ## Q131 | -1.805  | -1.100  | -0.522  | 0.303   | 0.922   | 1.968   | 1.483  |
| ## Q40  | -2.454  | -1.722  | -1.060  | -0.311  | 0.380   | 1.449   | 1.685  |
| ## Q132 | -2.662  | -1.523  | -0.844  | 0.193   | 1.193   | 2.820   | 0.797  |
| ## Q62  | -1.001  | -0.360  | 0.175   | 0.684   | 1.239   | 1.964   | 1.603  |
| ## Q50  | -2.966  | -2.017  | -1.434  | -0.694  | 0.060   | 1.072   | 1.062  |

## Test Information Function

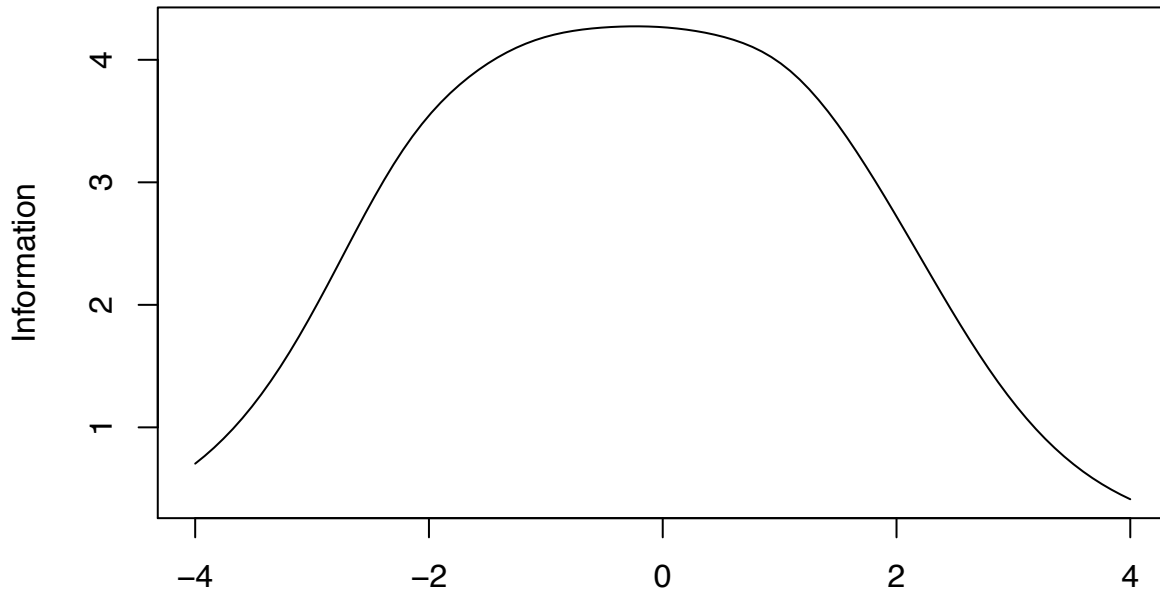

## Item Information Curves

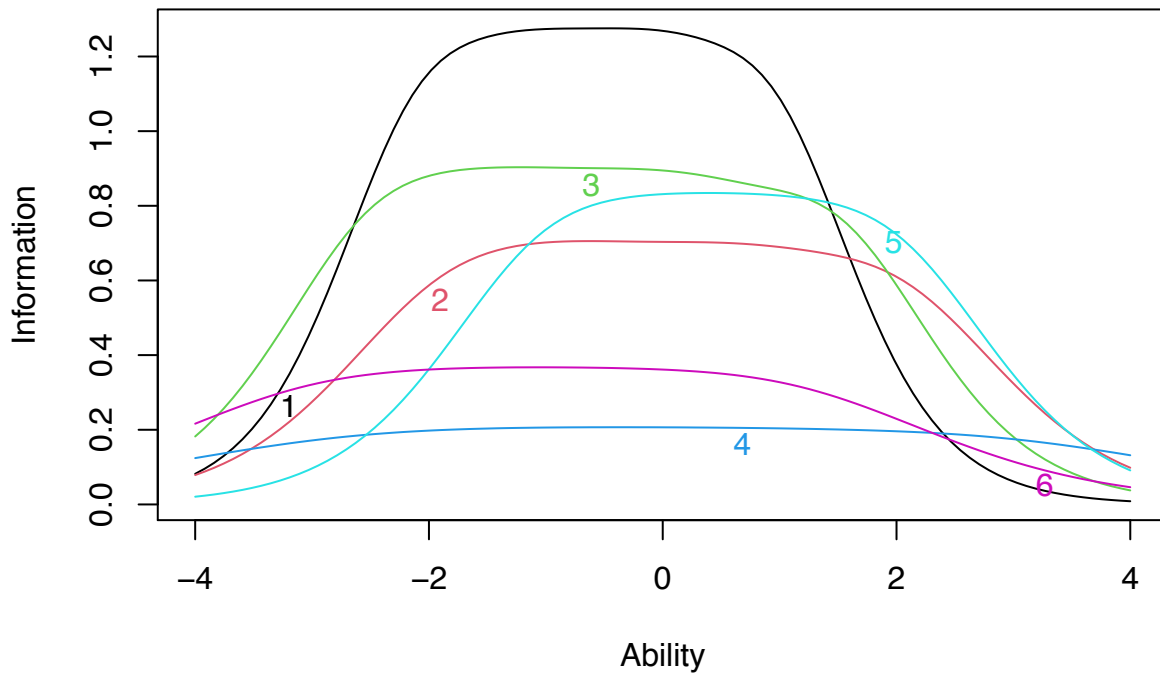

[Back to top](#)

Site 2

Reliability: Social Safety



```

## Cronbach's alpha is 0.742.
## Mean item-total correlation is 0.325.
## If each item were dropped:
##      raw_alpha std.alpha G6(smc) average_r S/N alpha se  var.r med.r
## Q43      0.69      0.69   0.66      0.31 2.3   0.020 0.0120 0.34
## Q131     0.69      0.69   0.67      0.31 2.3   0.020 0.0145 0.34
## Q40      0.69      0.69   0.66      0.31 2.2   0.020 0.0167 0.33
## Q132     0.76      0.76   0.72      0.39 3.2   0.016 0.0026 0.38
## Q62      0.69      0.69   0.66      0.31 2.2   0.020 0.0116 0.35
## Q50      0.70      0.70   0.67      0.32 2.4   0.019 0.0111 0.34

```

### Scree Plot

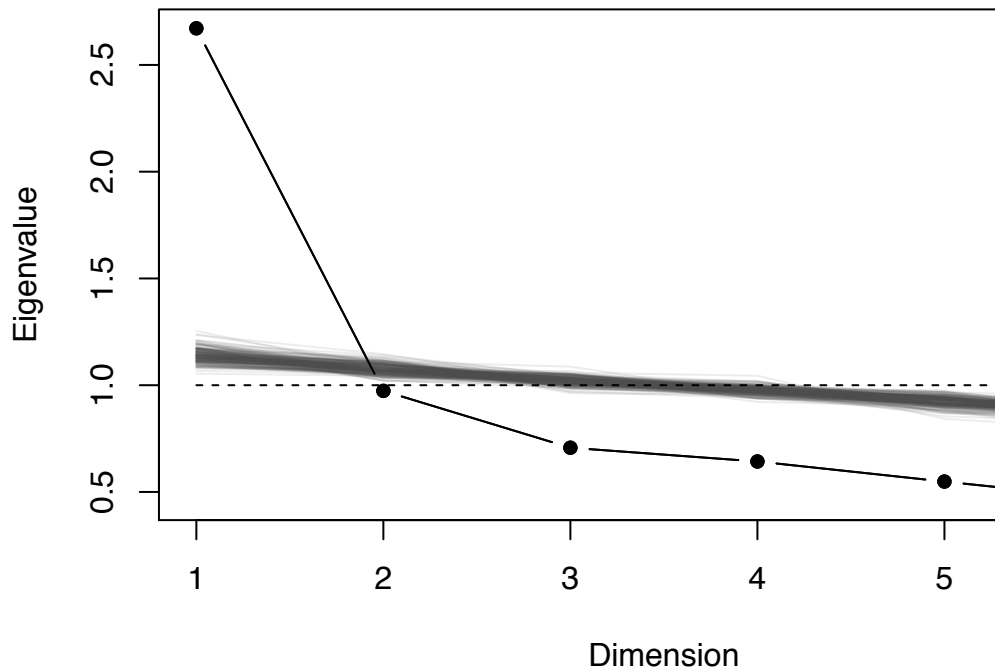

Unidimensionality: Social Safety

```

## [1] "Ratio of first to second eigenvalues: 2.745"
## [1] 2.6716093 0.9733936 0.7070720 0.6426684 0.5485788 0.4566778
## Factor Analysis using method = minres
## Call: fa(r = grm_obj$X)
## Standardized loadings (pattern matrix) based upon correlation matrix
##      MR1  h2  u2 com
## Q43  0.63 0.40 0.60  1
## Q131 0.62 0.39 0.61  1
## Q40   0.63 0.39 0.61  1
## Q132 0.32 0.10 0.90  1
## Q62   0.64 0.40 0.60  1
## Q50   0.60 0.36 0.64  1
##
##              MR1
## SS loadings  2.04
## Proportion Var 0.34
##

```

```

## Mean item complexity = 1
## Test of the hypothesis that 1 factor is sufficient.
##
## The degrees of freedom for the null model are 15 and the objective function was 1.22 with Chi Squ
## The degrees of freedom for the model are 9 and the objective function was 0.11
##
## The root mean square of the residuals (RMSR) is 0.06
## The df corrected root mean square of the residuals is 0.07
##
## The harmonic number of observations is 565 with the empirical chi square 54.3 with prob < 1.7e-0
## The total number of observations was 596 with Likelihood Chi Square = 64.1 with prob < 2.2e-10
##
## Tucker Lewis Index of factoring reliability = 0.87
## RMSEA index = 0.101 and the 90 % confidence intervals are 0.079 0.126
## BIC = 6.59
## Fit based upon off diagonal values = 0.97
## Measures of factor score adequacy
##
## Correlation of (regression) scores with factors MR1 0.88
## Multiple R square of scores with factors 0.77
## Minimum correlation of possible factor scores 0.53

```

#### Graded-Response Model: Social Safety

| ##      | Extrmt1 | Extrmt2 | Extrmt3 | Extrmt4 | Extrmt5 | Extrmt6 | Dscrmm |
|---------|---------|---------|---------|---------|---------|---------|--------|
| ## Q43  | -1.810  | -1.321  | -0.755  | -0.245  | 0.331   | 1.174   | 1.696  |
| ## Q131 | -1.750  | -1.083  | -0.506  | 0.137   | 0.933   | 2.160   | 1.487  |
| ## Q40  | -2.348  | -1.725  | -1.027  | -0.229  | 0.552   | 1.596   | 1.531  |
| ## Q132 | -2.887  | -1.746  | -0.742  | 0.723   | 2.193   | 3.834   | 0.635  |
| ## Q62  | -0.877  | -0.261  | 0.177   | 0.537   | 1.053   | 1.717   | 1.701  |
| ## Q50  | -2.199  | -1.418  | -0.927  | -0.264  | 0.319   | 1.155   | 1.508  |

### Test Information Function

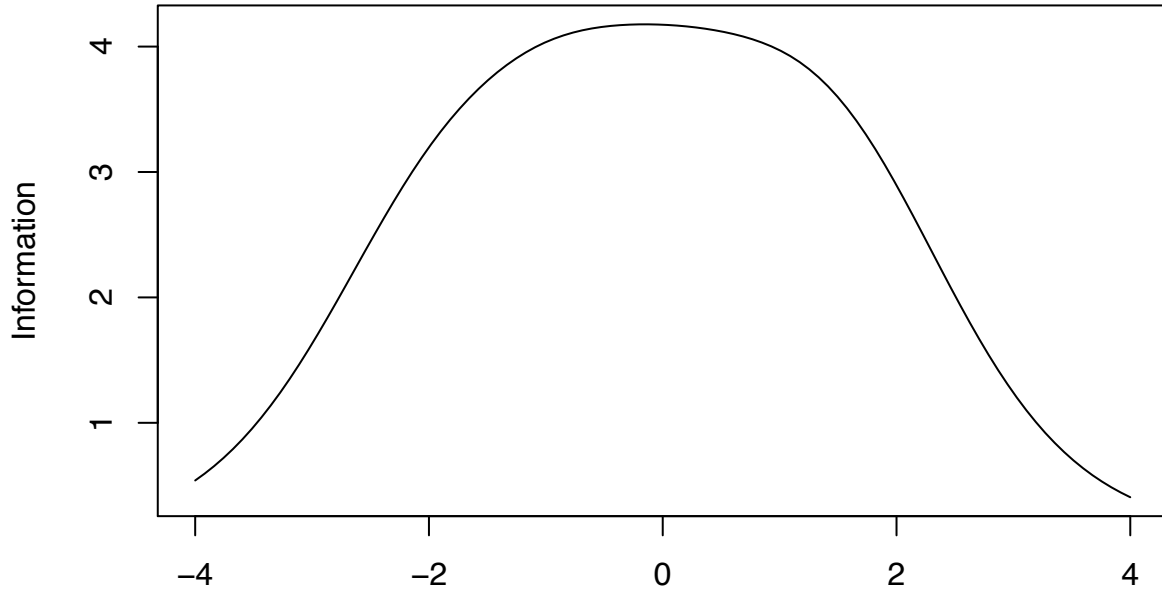

### Item Information Curves

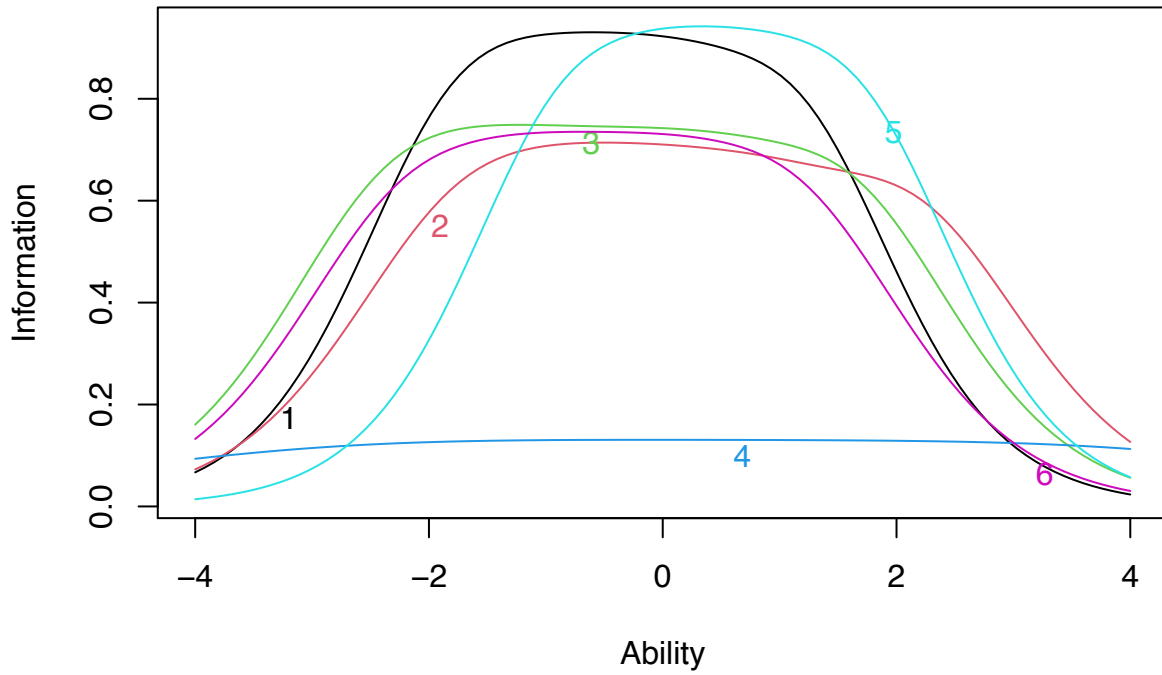

[Back to top](#)

Site DIF

## Call:

```

## lordif::lordif(resp.data = as.data.frame(merged_data), group = site)
##
## Number of DIF groups: 2
##
## Number of items flagged for DIF: 0 of 6
##
## Items flagged:
##
## Number of iterations for purification: 1 of 10
##
## Detection criterion: Chisqr
##
## Threshold: alpha = 0.01

```

Back to top

### Gender-based DIF: Social Safety

```

## Call:
## lordif::lordif(resp.data = as.data.frame(sex.data), group = sex)
##
## Number of DIF groups: 2
##
## Number of items flagged for DIF: 4 of 6
##
## Items flagged: 2, 4, 5, 6
##
## Number of iterations for purification: 2 of 10
##
## Detection criterion: Chisqr
##
## Threshold: alpha = 0.01
##
## item ncat chi12 chi13 chi23
## 1 1 7 0.6586 0.8414 0.6985
## 2 2 7 0.0000 0.0000 0.9181
## 3 3 7 0.1196 0.2791 0.7193
## 4 4 7 0.0036 0.0138 0.7406
## 5 5 7 0.0006 0.0000 0.0034
## 6 6 7 0.0000 0.0000 0.9805

```

### Trait Distributions

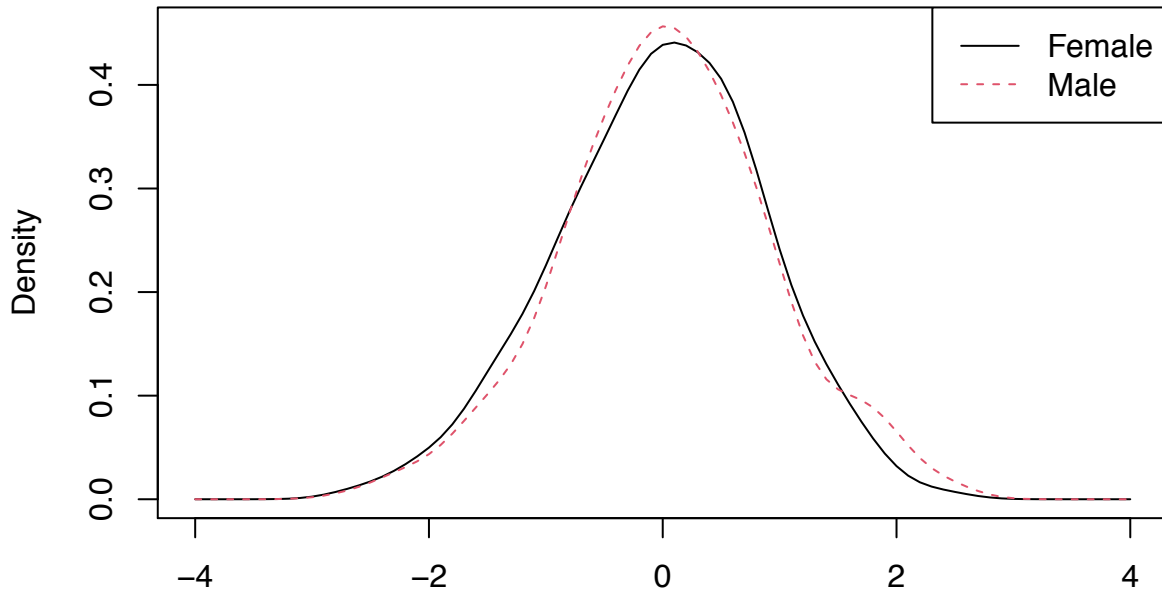

**Item True Score Functions – Item 2**      **Differences in Item True Score Function**

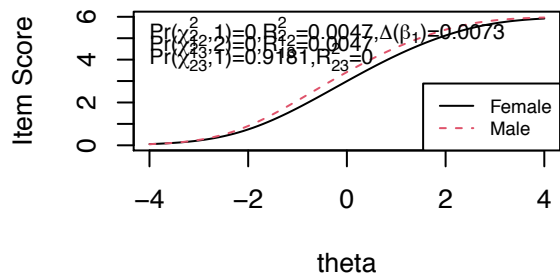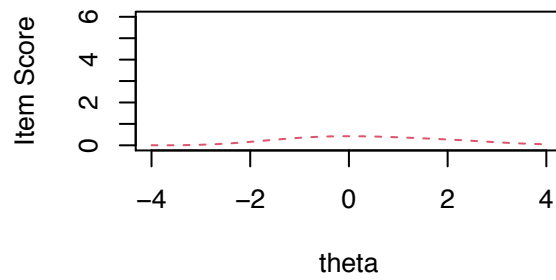

**Item Response Functions**

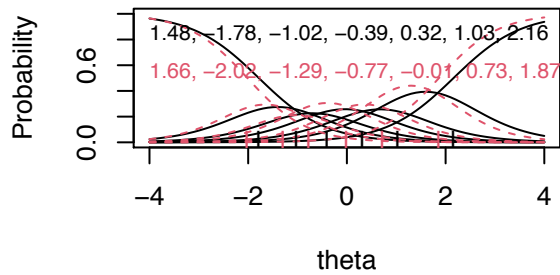

**Impact (Weighted by Density)**

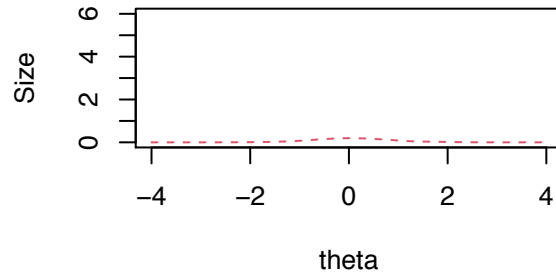

**Item True Score Functions – Item 4**

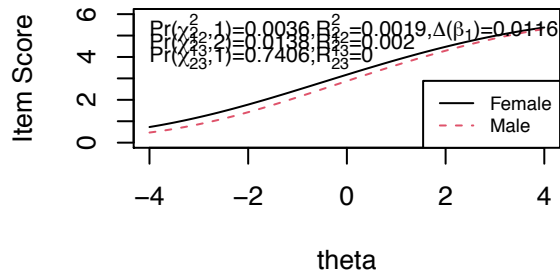

**Differences in Item True Score Function**

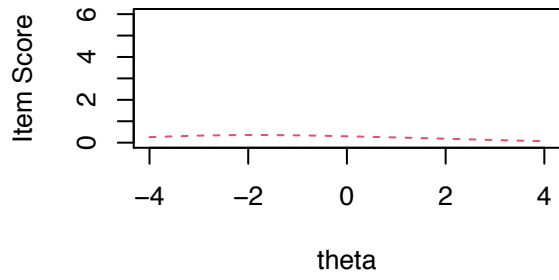

**Item Response Functions**

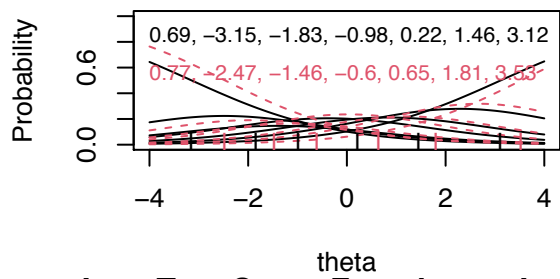

**Impact (Weighted by Density)**

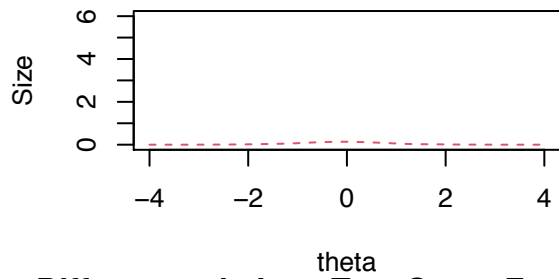

**Item True Score Functions – Item 5**

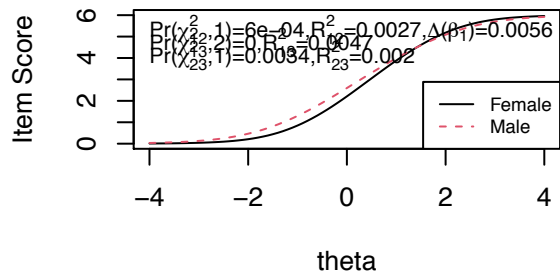

**Differences in Item True Score Function**

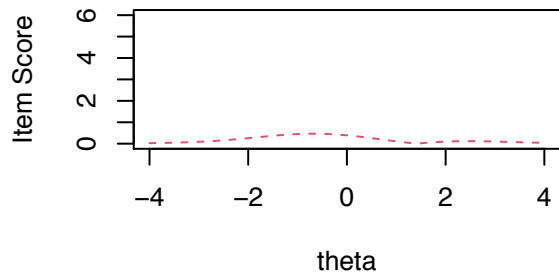

**Item Response Functions**

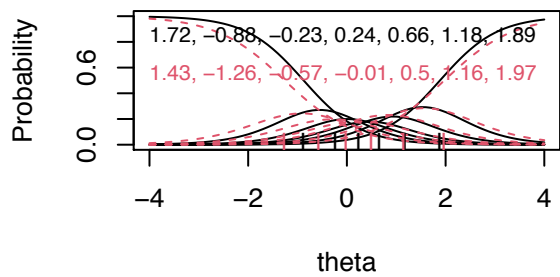

**Impact (Weighted by Density)**

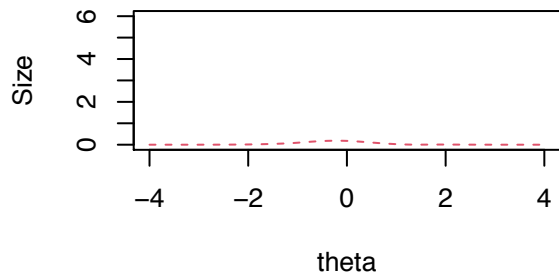

### Item True Score Functions – Item 6

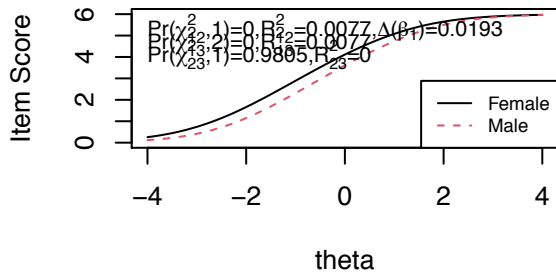

### Differences in Item True Score Function

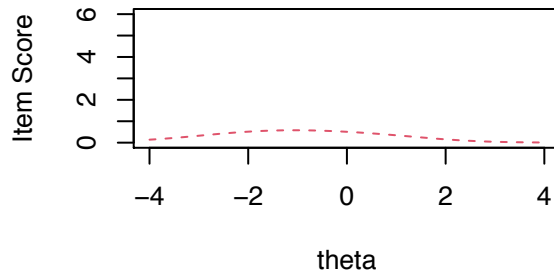

### Item Response Functions

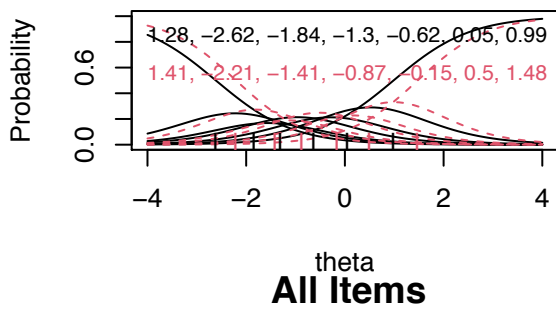

### Impact (Weighted by Density)

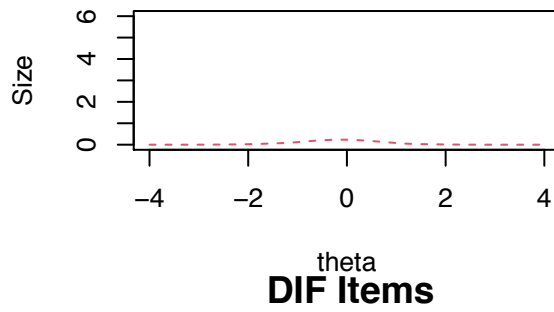

theta  
**All Items**

theta  
**DIF Items**

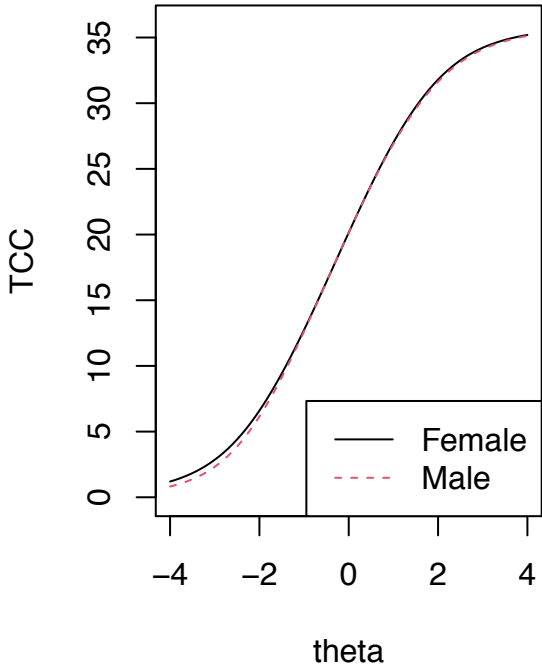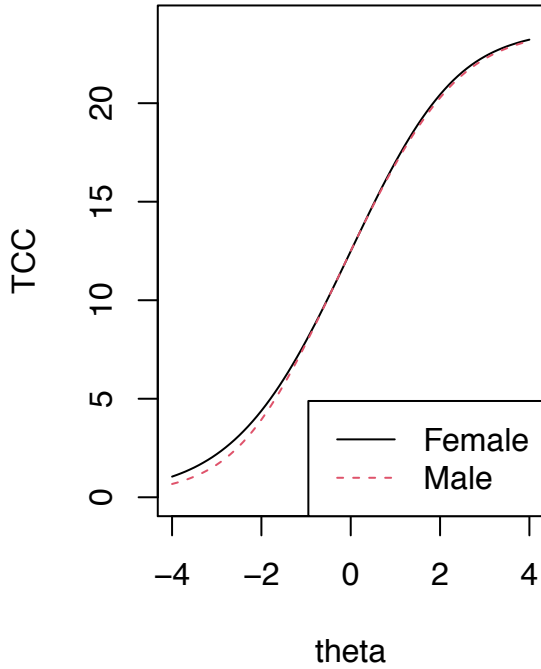

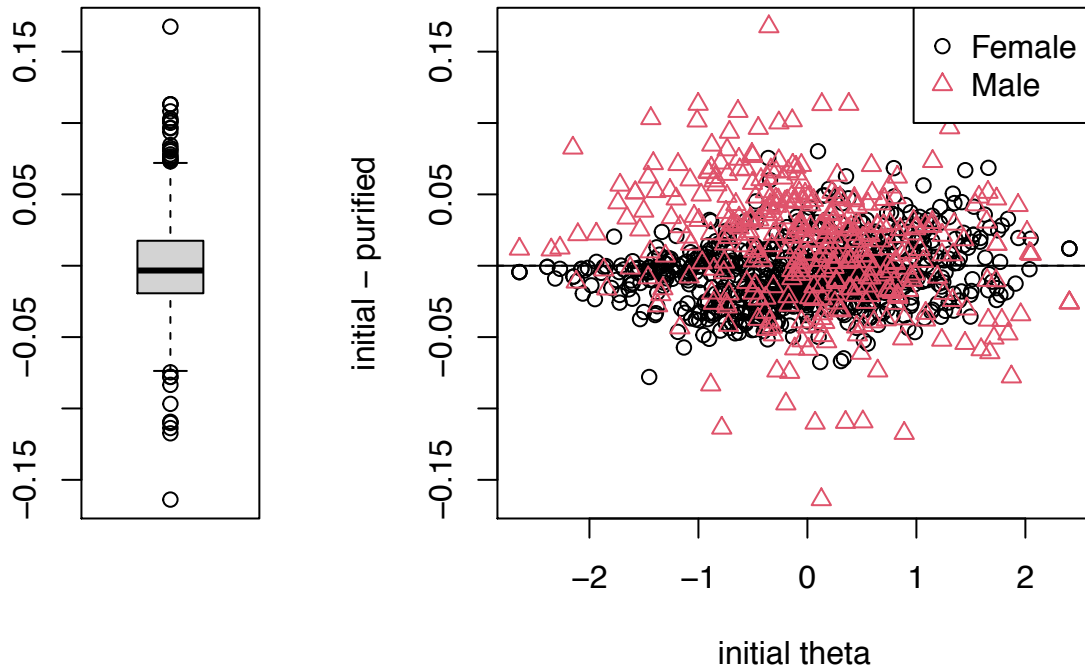

#### Age-based DIF: Social Safety

```
## Call:
## lordif::lordif(resp.data = as.data.frame(age.data), group = age)
##
## Number of DIF groups: 2
##
## Number of items flagged for DIF: 2 of 6
##
## Items flagged: 3, 6
##
## Number of iterations for purification: 2 of 10
##
## Detection criterion: Chisqr
##
## Threshold: alpha = 0.01
##
## item ncat chi12 chi13 chi23
## 1 1 7 0.8205 0.8712 0.6358
## 2 2 7 0.0112 0.0320 0.5006
## 3 3 7 0.0026 0.0097 0.6470
## 4 4 7 0.3093 0.3900 0.3567
## 5 5 7 0.1872 0.3098 0.4369
## 6 6 7 0.0004 0.0005 0.1158
```



## Trait Distributions

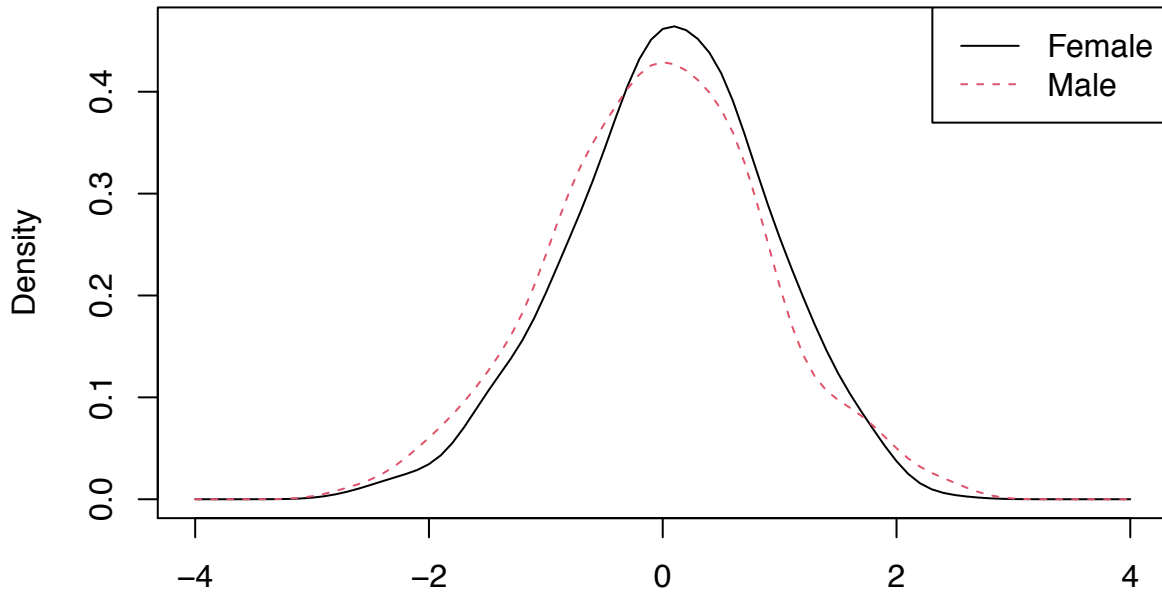

### Item True Score Functions – Item 3 Differences in Item True Score Function

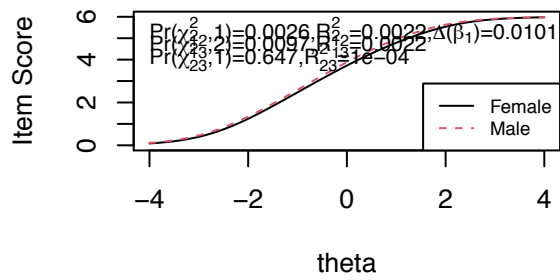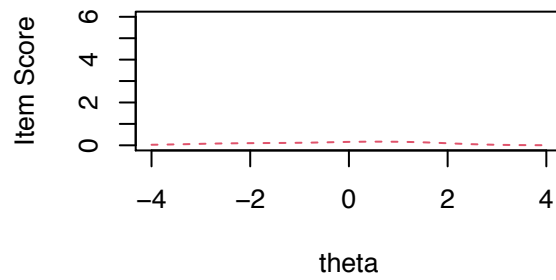

### Item Response Functions

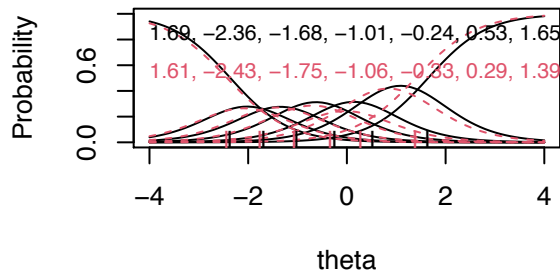

### Impact (Weighted by Density)

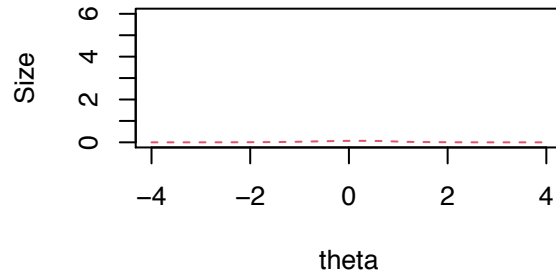

### Item True Score Functions – Item 6

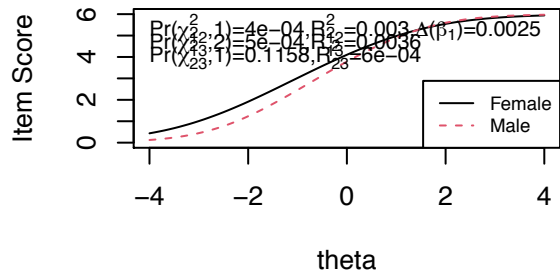

### Differences in Item True Score Function

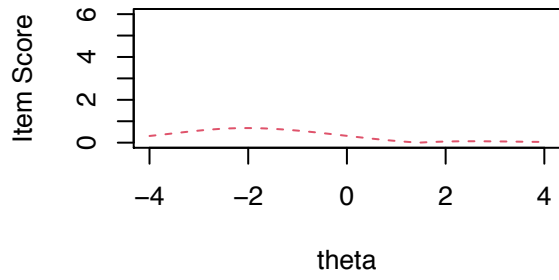

### Item Response Functions

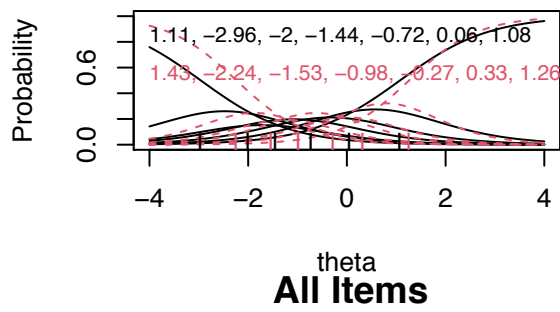

### Impact (Weighted by Density)

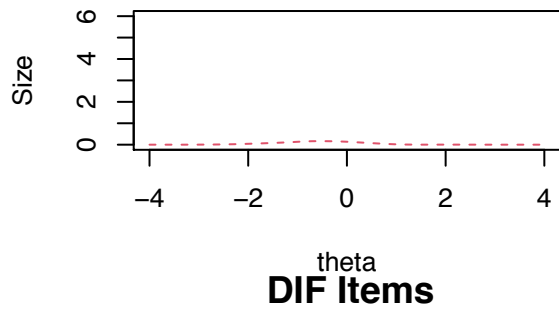

theta  
**All Items**

theta  
**DIF Items**

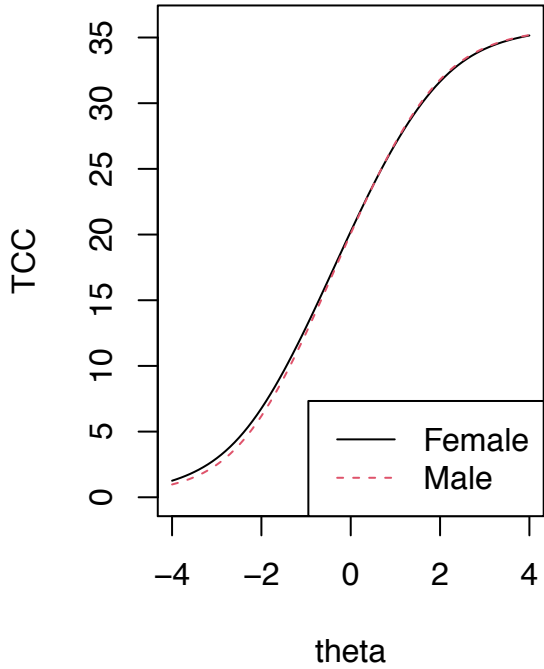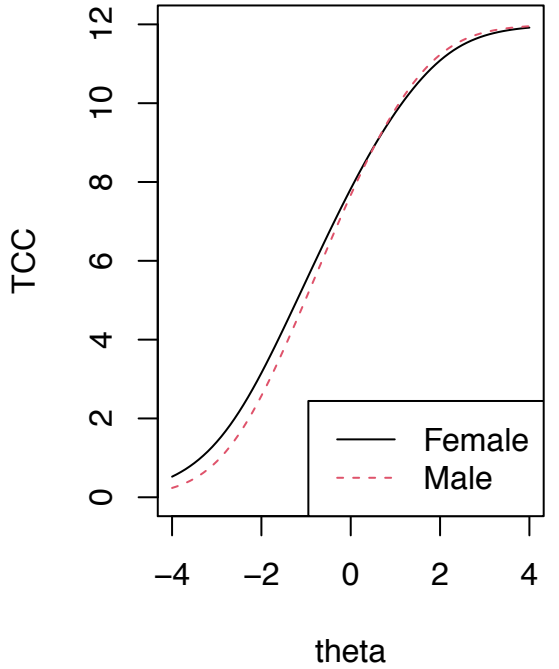

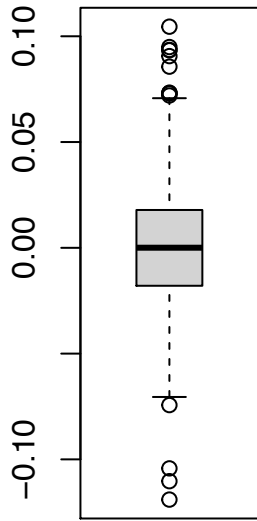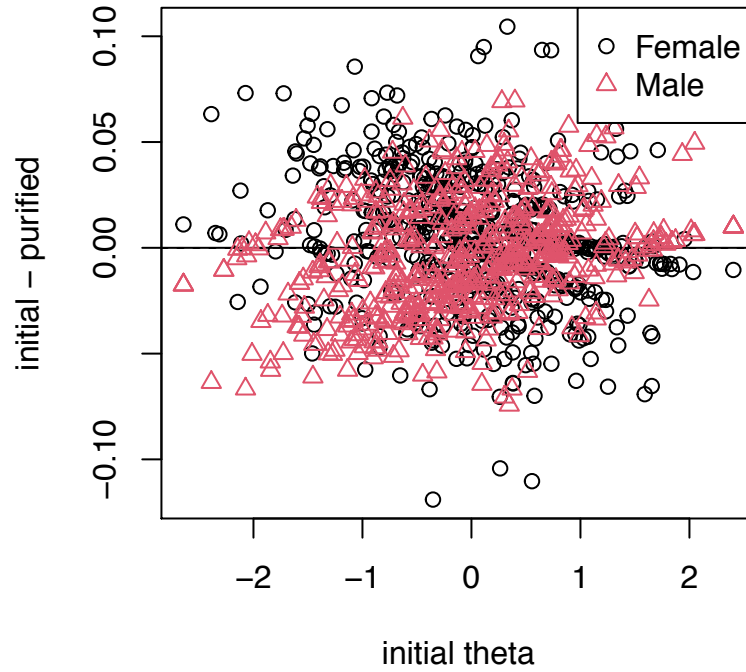

Back to top

## Need for Control

Site 1

### Reliability: Need for Control

```
## Cronbach's alpha is 0.624.
## Mean item-total correlation is 0.293.
## If each item were dropped:
##      raw_alpha std.alpha G6(smc) average_r S/N alpha se  var.r med.r
## Q26      0.50      0.51   0.42      0.26 1.0   0.035 0.0075 0.22
## Q20      0.54      0.54   0.45      0.28 1.2   0.032 0.0040 0.26
## Q68      0.58      0.57   0.50      0.31 1.3   0.029 0.0249 0.24
## Q130     0.59      0.59   0.51      0.32 1.4   0.029 0.0210 0.26
```

## Scree Plot

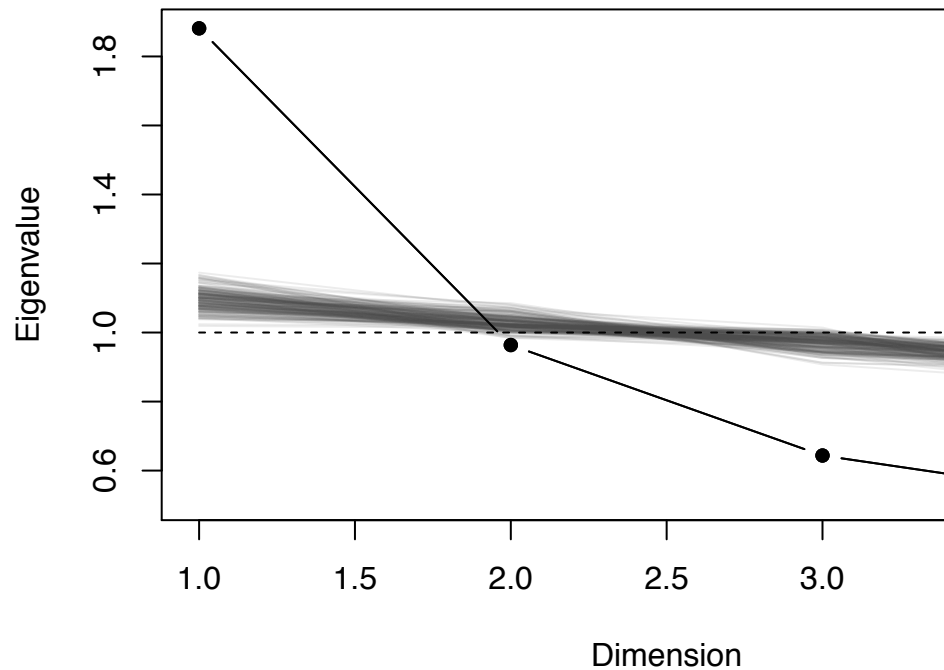

### Unidimensionality: Need for Control

```
## [1] "Ratio of first to second eigenvalues: 1.952"
## [1] 1.8814133 0.9637693 0.6436392 0.5111782
## Factor Analysis using method = minres
## Call: fa(r = grm_obj$X)
## Standardized loadings (pattern matrix) based upon correlation matrix
##      MR1  h2  u2 com
## Q26  0.68 0.46 0.54  1
## Q20  0.61 0.37 0.63  1
## Q68  0.46 0.21 0.79  1
## Q130 0.43 0.18 0.82  1
##
##              MR1
## SS loadings  1.22
## Proportion Var 0.30
##
## Mean item complexity = 1
## Test of the hypothesis that 1 factor is sufficient.
##
## The degrees of freedom for the null model are 6 and the objective function was 0.52 with Chi Square
## The degrees of freedom for the model are 2 and the objective function was 0.08
##
## The root mean square of the residuals (RMSR) is 0.09
## The df corrected root mean square of the residuals is 0.15
##
## The harmonic number of observations is 573 with the empirical chi square 49.77 with prob < 1.6e-
## The total number of observations was 617 with Likelihood Chi Square = 46.68 with prob < 7.3e-11
##
## Tucker Lewis Index of factoring reliability = 0.569
## RMSEA index = 0.19 and the 90 % confidence intervals are 0.145 0.24
```

```

## BIC = 33.83
## Fit based upon off diagonal values = 0.92
## Measures of factor score adequacy
##
## Correlation of (regression) scores with factors      MR1
## Multiple R square of scores with factors            0.66
## Minimum correlation of possible factor scores       0.31

```

**Graded-Response Model: Need for Control**

| ##      | Extrmt1 | Extrmt2 | Extrmt3 | Extrmt4 | Extrmt5 | Extrmt6 | Dscrmn |
|---------|---------|---------|---------|---------|---------|---------|--------|
| ## Q26  | -1.335  | -0.663  | -0.269  | 0.327   | 0.877   | 1.529   | 1.901  |
| ## Q20  | -1.302  | -0.606  | -0.175  | 0.234   | 0.771   | 1.376   | 1.596  |
| ## Q68  | -2.806  | -1.824  | -1.226  | -0.396  | 0.399   | 1.313   | 0.933  |
| ## Q130 | -1.633  | -0.217  | 0.611   | 1.633   | 2.691   | 3.668   | 0.796  |

**Test Information Function**

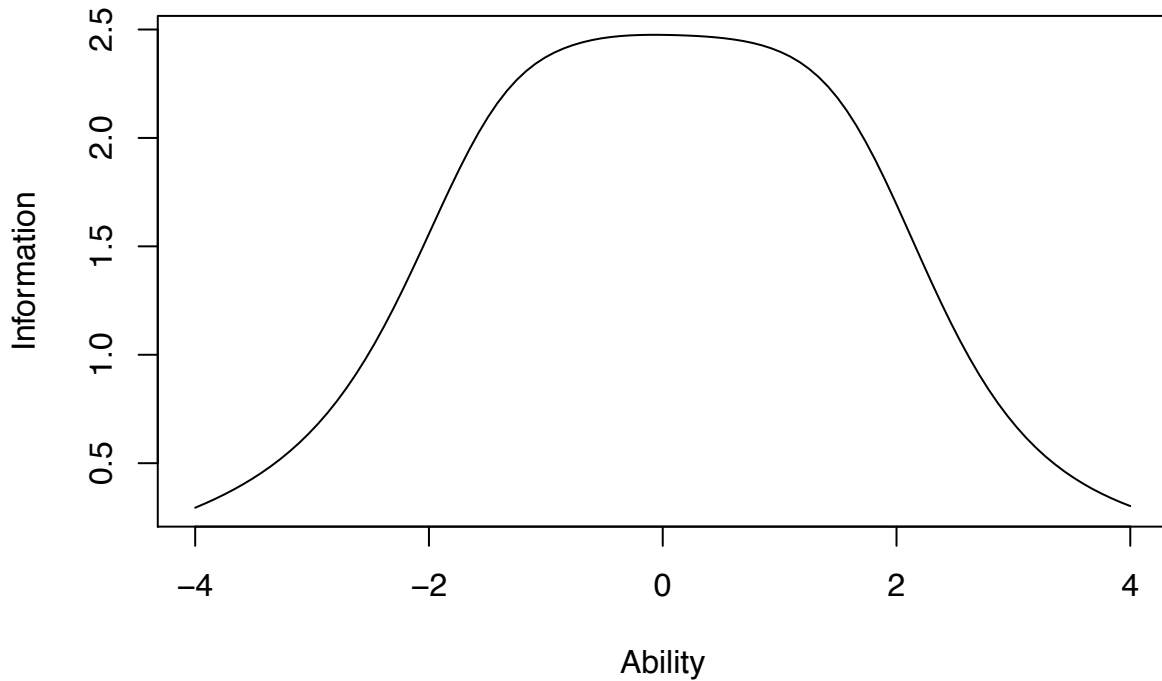

## Item Information Curves

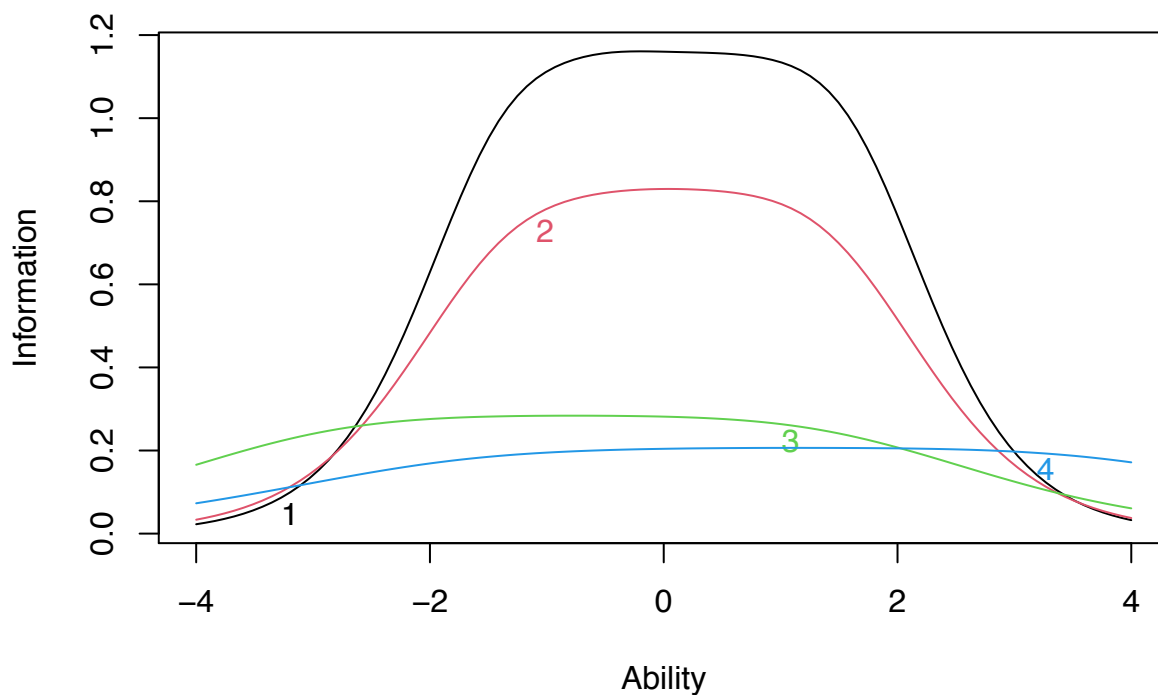

[Back to top](#)

### Site 2

#### Reliability: Need for Control

## Cronbach's alpha is 0.674.

## Mean item-total correlation is 0.341.

## If each item were dropped:

| ##      | raw_alpha | std.alpha | G6(smc) | average_r | S/N | alpha se | var.r   | med.r |
|---------|-----------|-----------|---------|-----------|-----|----------|---------|-------|
| ## Q26  | 0.59      | 0.59      | 0.50    | 0.33      | 1.5 | 0.029    | 0.00087 | 0.34  |
| ## Q20  | 0.57      | 0.57      | 0.47    | 0.31      | 1.3 | 0.031    | 0.00164 | 0.31  |
| ## Q68  | 0.65      | 0.65      | 0.56    | 0.38      | 1.9 | 0.024    | 0.00855 | 0.35  |
| ## Q130 | 0.62      | 0.62      | 0.53    | 0.35      | 1.6 | 0.027    | 0.01469 | 0.29  |

## Scree Plot

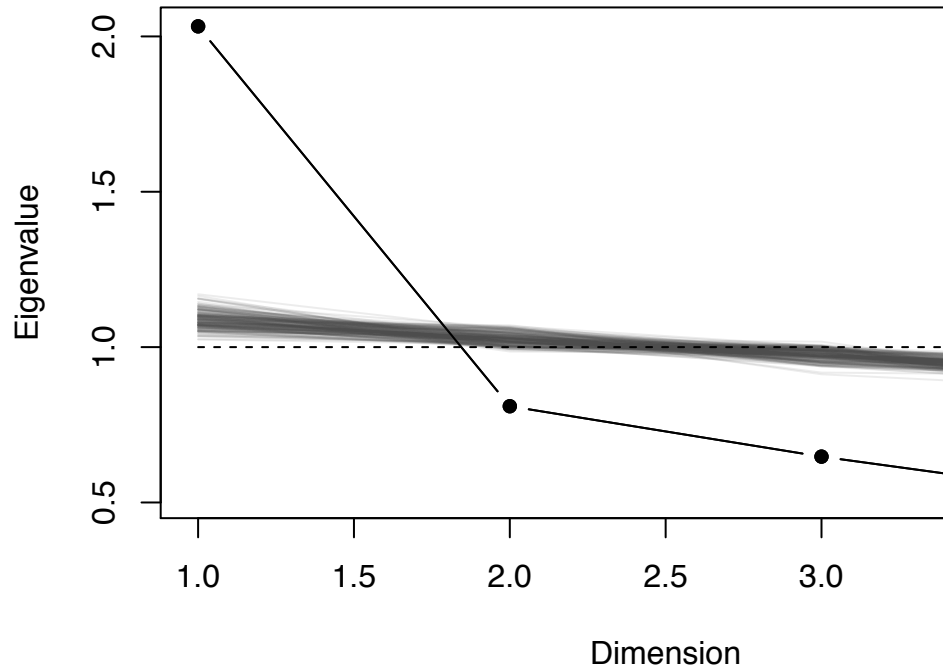

Unidimensionality: Need for Control

```
## [1] "Ratio of first to second eigenvalues: 2.51"
```

```
## [1] 2.0323792 0.8097225 0.6475203 0.5103781
```

```
## Factor Analysis using method = minres
```

```
## Call: fa(r = grm_obj$X)
```

```
## Standardized loadings (pattern matrix) based upon correlation matrix
```

```
##      MR1  h2  u2 com
```

```
## Q26  0.63 0.40 0.60  1
```

```
## Q20  0.69 0.48 0.52  1
```

```
## Q68  0.47 0.22 0.78  1
```

```
## Q130 0.55 0.30 0.70  1
```

```
##
```

```
##              MR1
```

```
## SS loadings  1.40
```

```
## Proportion Var 0.35
```

```
##
```

```
## Mean item complexity = 1
```

```
## Test of the hypothesis that 1 factor is sufficient.
```

```
##
```

```
## The degrees of freedom for the null model are 6 and the objective function was 0.61 with Chi Square
```

```
## The degrees of freedom for the model are 2 and the objective function was 0.03
```

```
##
```

```
## The root mean square of the residuals (RMSR) is 0.05
```

```
## The df corrected root mean square of the residuals is 0.08
```

```
##
```

```
## The harmonic number of observations is 554 with the empirical chi square 14.81 with prob < 0.000
```

```
## The total number of observations was 596 with Likelihood Chi Square = 16.92 with prob < 0.00021
```

```
##
```

```
## Tucker Lewis Index of factoring reliability = 0.874
```

```
## RMSEA index = 0.112 and the 90 % confidence intervals are 0.067 0.164
```

```

## BIC = 4.14
## Fit based upon off diagonal values = 0.98
## Measures of factor score adequacy
##
## Correlation of (regression) scores with factors      MR1
## Multiple R square of scores with factors            0.70
## Minimum correlation of possible factor scores       0.39

```

**Graded-Response Model: Need for Control**

| ##      | Extrmt1 | Extrmt2 | Extrmt3 | Extrmt4 | Extrmt5 | Extrmt6 | Dscrmm |
|---------|---------|---------|---------|---------|---------|---------|--------|
| ## Q26  | -0.901  | -0.194  | 0.277   | 0.758   | 1.262   | 1.803   | 1.732  |
| ## Q20  | -0.983  | -0.325  | 0.094   | 0.504   | 1.004   | 1.632   | 1.936  |
| ## Q68  | -2.187  | -1.267  | -0.637  | -0.026  | 0.742   | 1.421   | 1.060  |
| ## Q130 | -0.798  | 0.190   | 0.716   | 1.367   | 2.045   | 2.695   | 1.240  |

**Test Information Function**

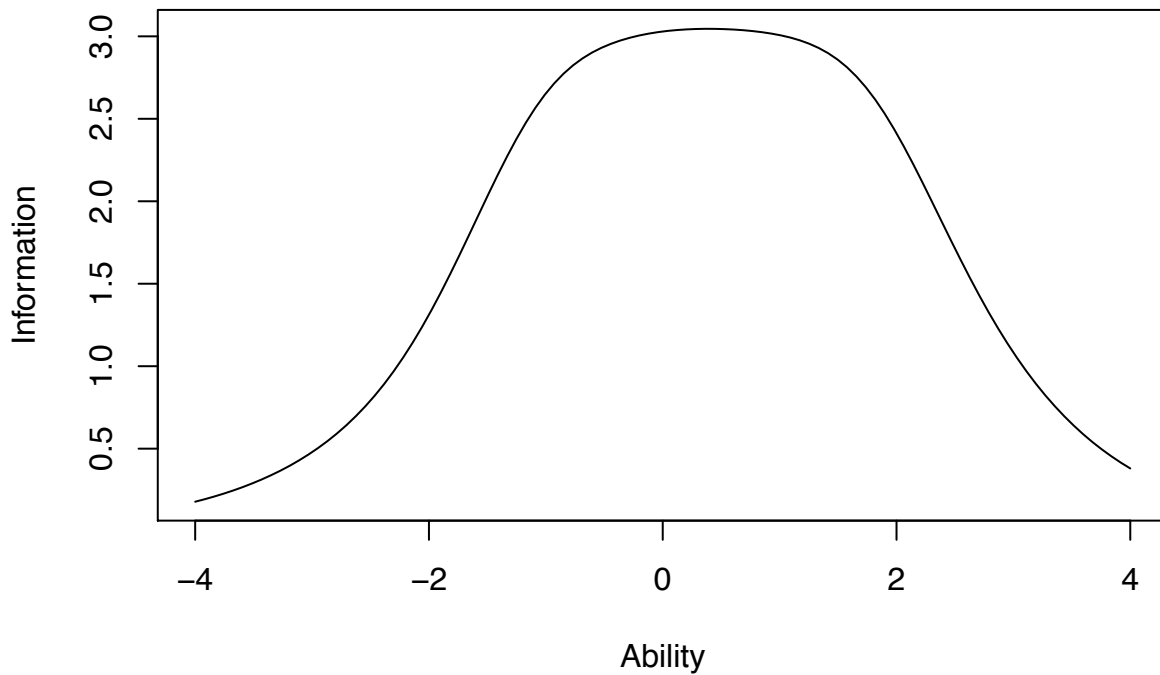



## Item Information Curves

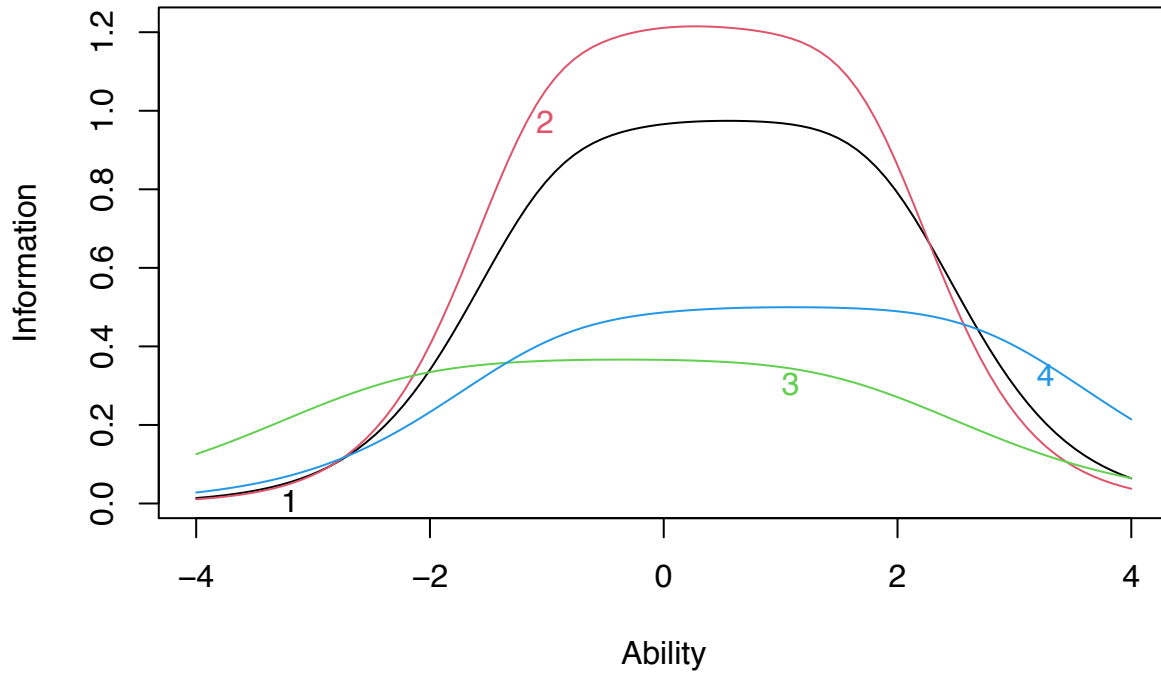

[Back to top](#)

### Site DIF

```
## Call:
## lordif::lordif(resp.data = as.data.frame(merged_data), group = site)
##
##   Number of DIF groups: 2
##
##   Number of items flagged for DIF: 0 of 4
##
##   Items flagged:
##
##   Number of iterations for purification: 1 of 10
##
##   Detection criterion: Chisqr
##
##   Threshold: alpha = 0.01
```

[Back to top](#)

### Gender-based DIF: Need for Control

```
## Call:
## lordif::lordif(resp.data = as.data.frame(sex.data), group = sex)
##
##   Number of DIF groups: 2
##
##   Number of items flagged for DIF: 2 of 4
```

```
##
## Items flagged: 3, 4
##
## Number of iterations for purification: 5 of 10
##
## Detection criterion: Chisqr
##
## Threshold: alpha = 0.01
##
## item ncat chi12 chi13 chi23
## 1 1 7 0.5272 0.5910 0.4194
## 2 2 7 0.3421 0.2306 0.1541
## 3 3 7 0.0000 0.0000 0.0700
## 4 4 7 0.0001 0.0006 0.9197
```

### Trait Distributions

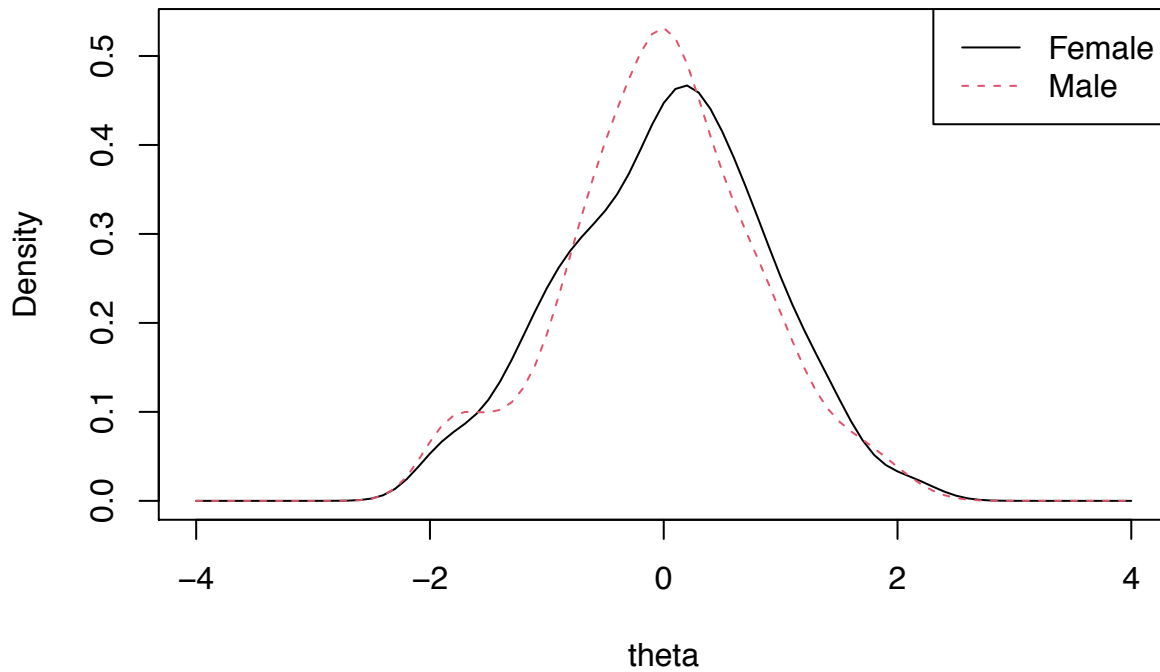

### Item True Score Functions – Item 3

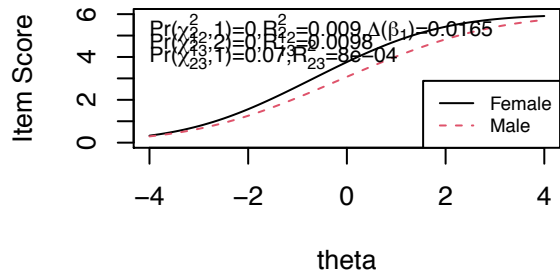

### Differences in Item True Score Function

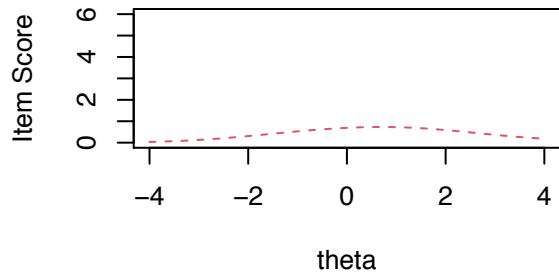

### Item Response Functions

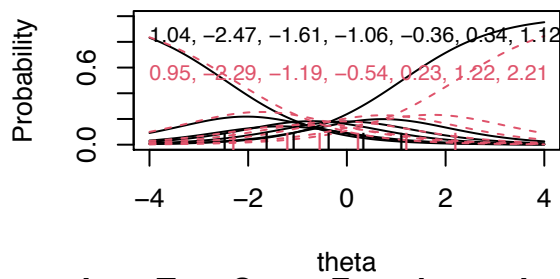

### Impact (Weighted by Density)

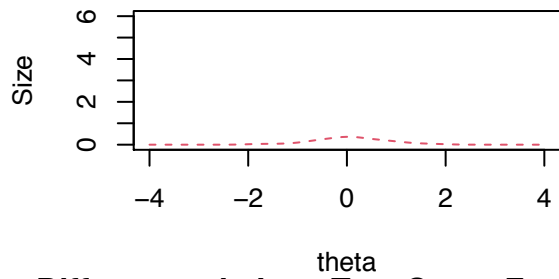

### Item True Score Functions – Item 4

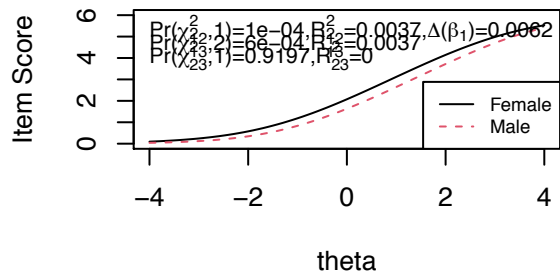

### Differences in Item True Score Function

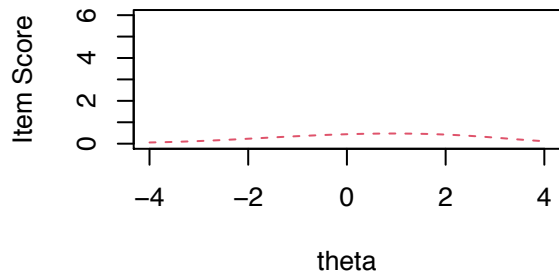

### Item Response Functions

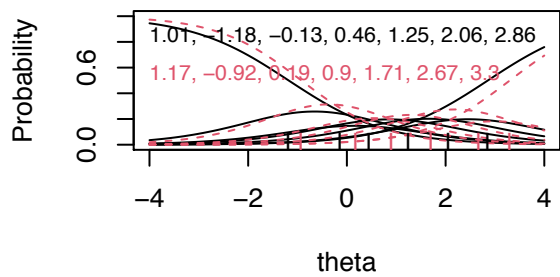

### Impact (Weighted by Density)

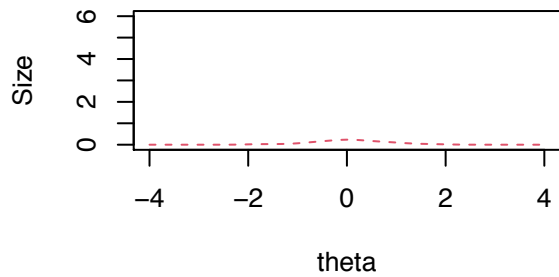

All Items

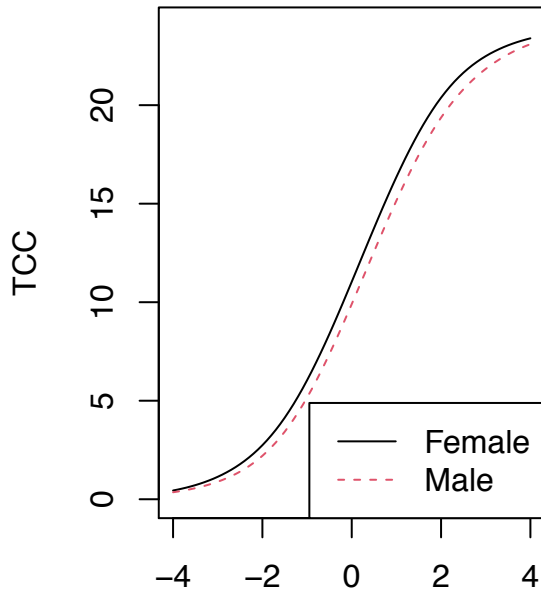

DIF Items

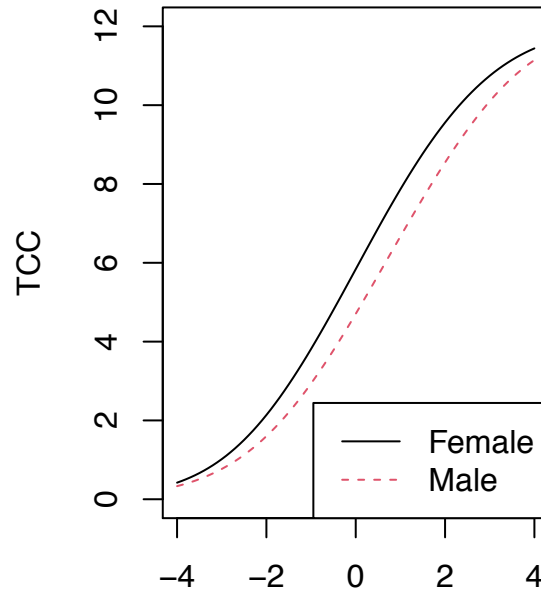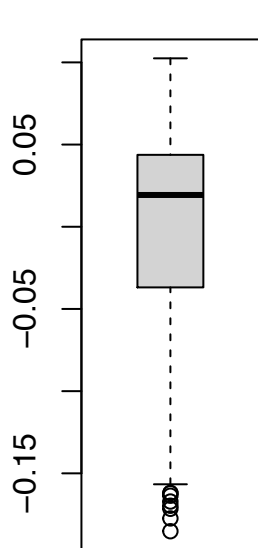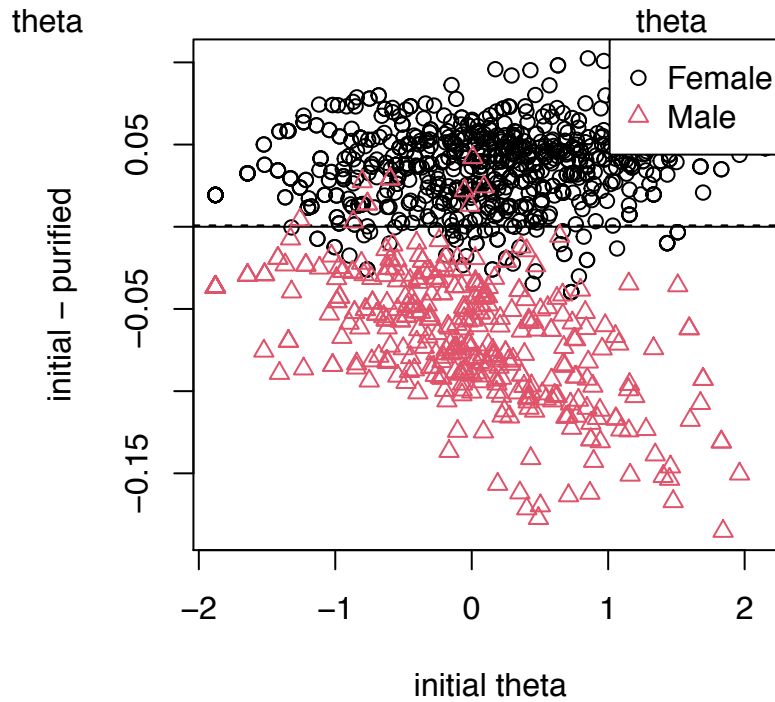

Age-based DIF: Need for Control

```
## Call:
## lordif::lordif(resp.data = as.data.frame(age.data), group = age)
##
## Number of DIF groups: 2
##
```

```
## Number of items flagged for DIF: 1 of 4
##
## Items flagged: 2
##
## Number of iterations for purification: 2 of 10
##
## Detection criterion: Chisqr
##
## Threshold: alpha = 0.01
##
## item ncat chi12 chi13 chi23
## 1 1 7 0.0846 0.1100 0.2301
## 2 2 7 0.0000 0.0000 0.0122
## 3 3 7 0.6912 0.8055 0.6001
## 4 4 7 0.7262 0.9398 0.9686
```

### Trait Distributions

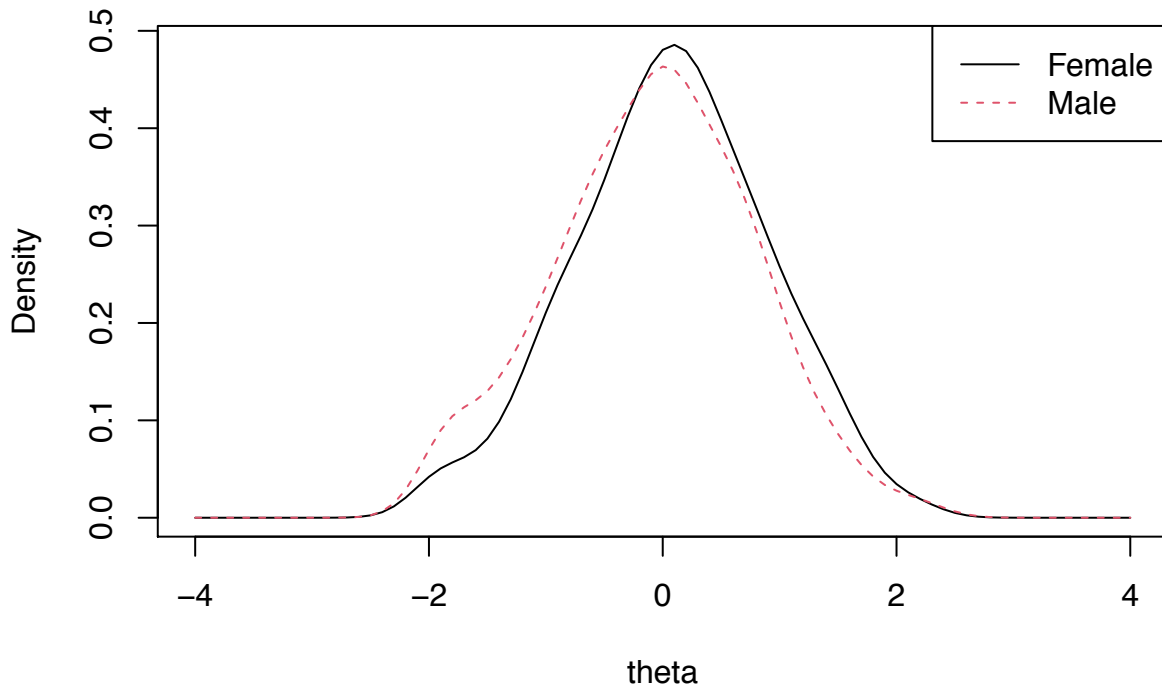

**Item True Score Functions – Item 2**

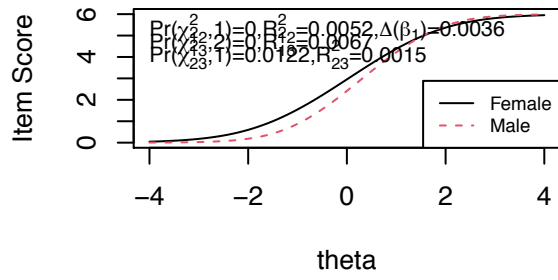

**Differences in Item True Score Function**

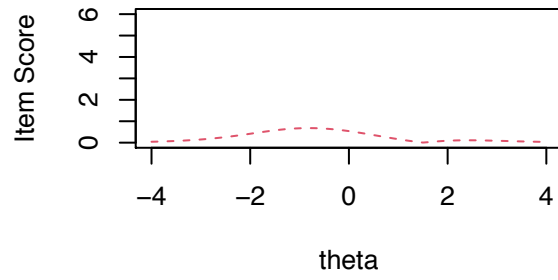

**Item Response Functions**

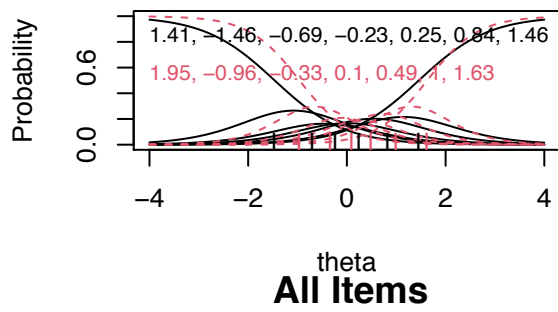

**Impact (Weighted by Density)**

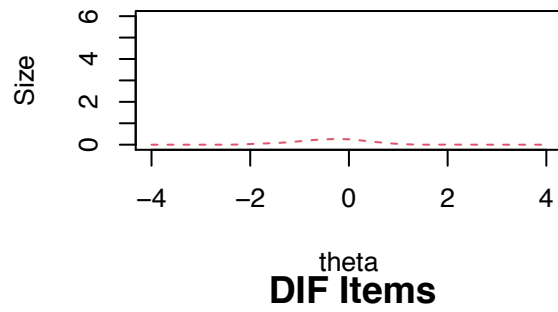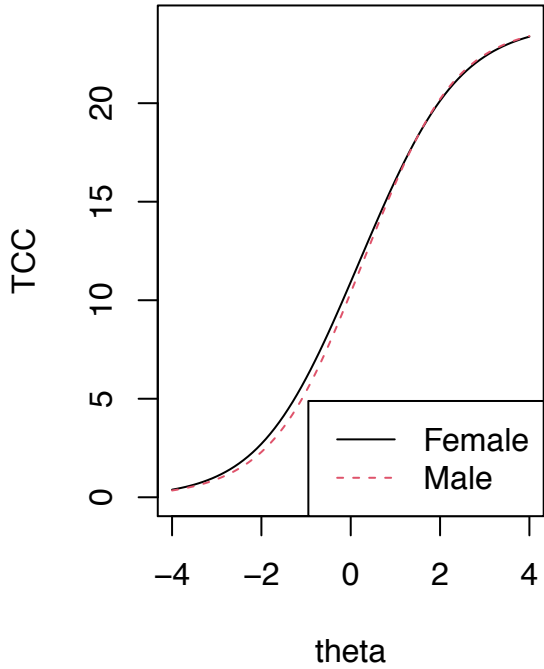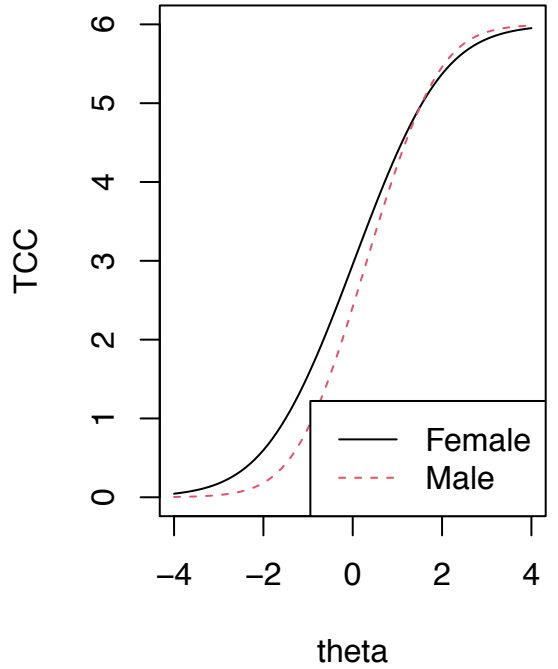

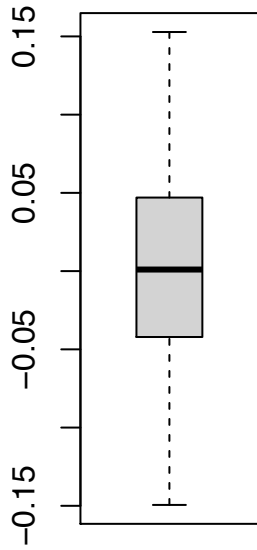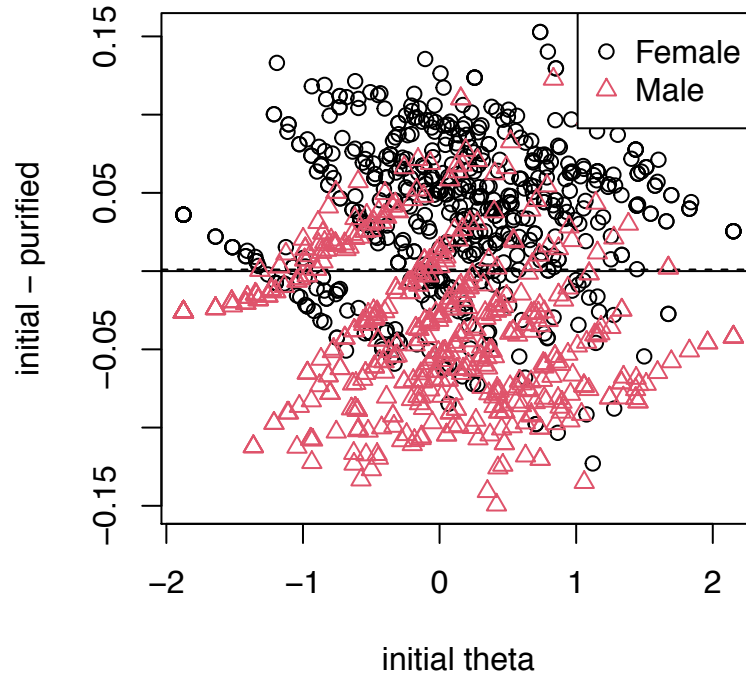

Back to top

## Hopelessness

Site 1

### Reliability: Hopelessness

```
## Cronbach's alpha is 0.807.
## Mean item-total correlation is 0.448.
## If each item were dropped:
##      raw_alpha std.alpha G6(smc) average_r S/N alpha se  var.r med.r
## Q15      0.84      0.84   0.80      0.56 5.2   0.011 0.0019 0.58
## Q61      0.74      0.73   0.71      0.40 2.7   0.017 0.0430 0.42
## Q115     0.74      0.73   0.71      0.40 2.7   0.017 0.0299 0.46
## Q24      0.75      0.75   0.73      0.42 2.9   0.016 0.0321 0.46
## Q88      0.77      0.76   0.74      0.45 3.2   0.015 0.0256 0.49
```

## Scree Plot

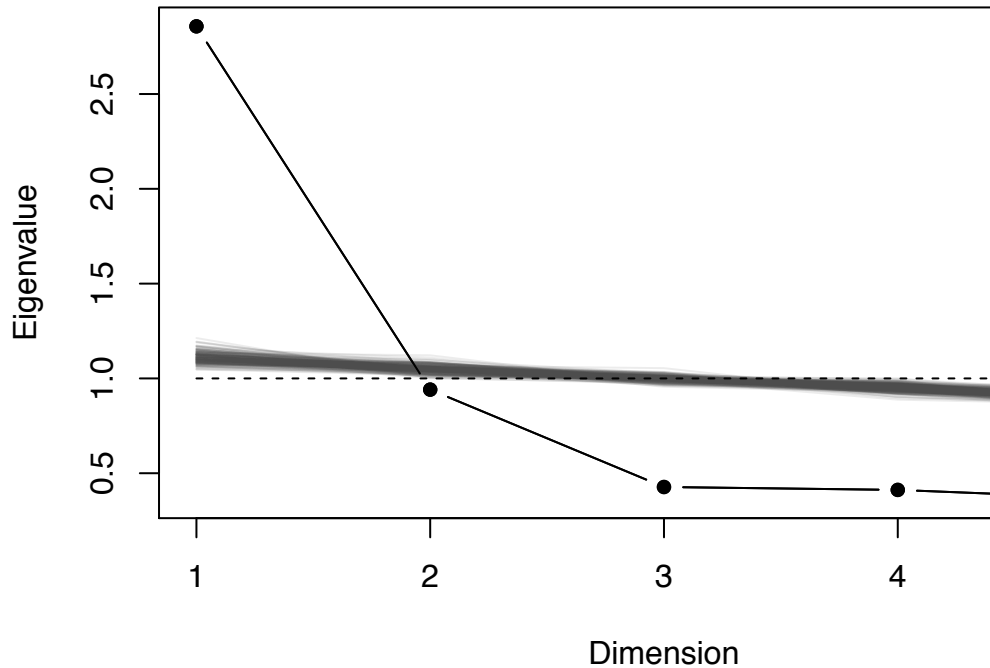

### Unidimensionality: Hopelessness

```
## [1] "Ratio of first to second eigenvalues: 3.036"
## [1] 2.8569948 0.9409413 0.4273236 0.4119507 0.3627897
## Factor Analysis using method = minres
## Call: fa(r = grm_obj$X)
## Standardized loadings (pattern matrix) based upon correlation matrix
##      MR1  h2  u2 com
## Q15  0.37 0.14 0.86  1
## Q61  0.76 0.57 0.43  1
## Q115 0.81 0.65 0.35  1
## Q24  0.75 0.56 0.44  1
## Q88  0.69 0.48 0.52  1
##
##              MR1
## SS loadings  2.40
## Proportion Var 0.48
##
## Mean item complexity = 1
## Test of the hypothesis that 1 factor is sufficient.
##
## The degrees of freedom for the null model are 10 and the objective function was 1.76 with Chi Square
## The degrees of freedom for the model are 5 and the objective function was 0.13
##
## The root mean square of the residuals (RMSR) is 0.07
## The df corrected root mean square of the residuals is 0.1
##
## The harmonic number of observations is 589 with the empirical chi square 55.26 with prob < 1.2e-
## The total number of observations was 617 with Likelihood Chi Square = 76.62 with prob < 4.3e-15
##
## Tucker Lewis Index of factoring reliability = 0.866
```



```

## RMSEA index = 0.152 and the 90 % confidence intervals are 0.123 0.184
## BIC = 44.49
## Fit based upon off diagonal values = 0.98
## Measures of factor score adequacy
##
## Correlation of (regression) scores with factors MR1 0.92
## Multiple R square of scores with factors 0.85
## Minimum correlation of possible factor scores 0.70

```

**Graded-Response Model: Hopelessness**

| ##      | Extrmt1 | Extrmt2 | Extrmt3 | Extrmt4 | Extrmt5 | Extrmt6 | Dscrmm |
|---------|---------|---------|---------|---------|---------|---------|--------|
| ## Q15  | -1.537  | -0.372  | 0.800   | 2.030   | 3.133   | 4.623   | 0.783  |
| ## Q61  | -0.866  | -0.287  | 0.213   | 0.776   | 1.257   | 1.829   | 2.336  |
| ## Q115 | -1.480  | -0.881  | -0.387  | 0.139   | 0.689   | 1.276   | 2.604  |
| ## Q24  | -1.544  | -0.793  | -0.394  | 0.130   | 0.641   | 1.333   | 2.080  |
| ## Q88  | -2.100  | -1.563  | -1.117  | -0.638  | -0.110  | 0.542   | 1.935  |

**Test Information Function**

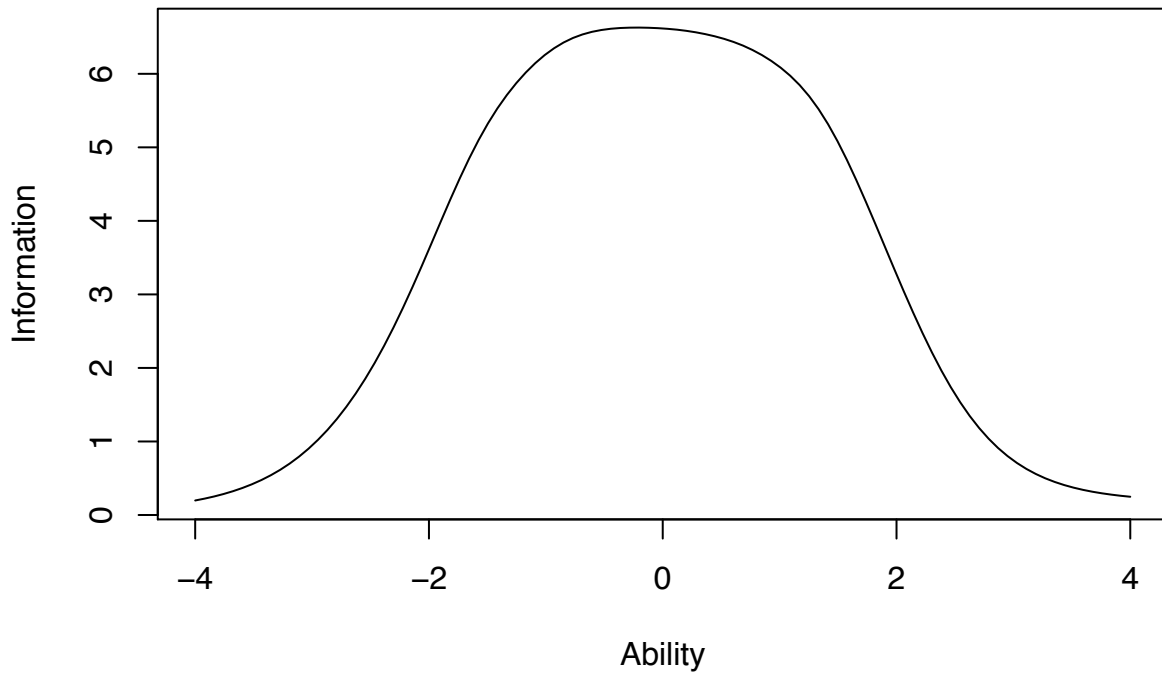

## Item Information Curves

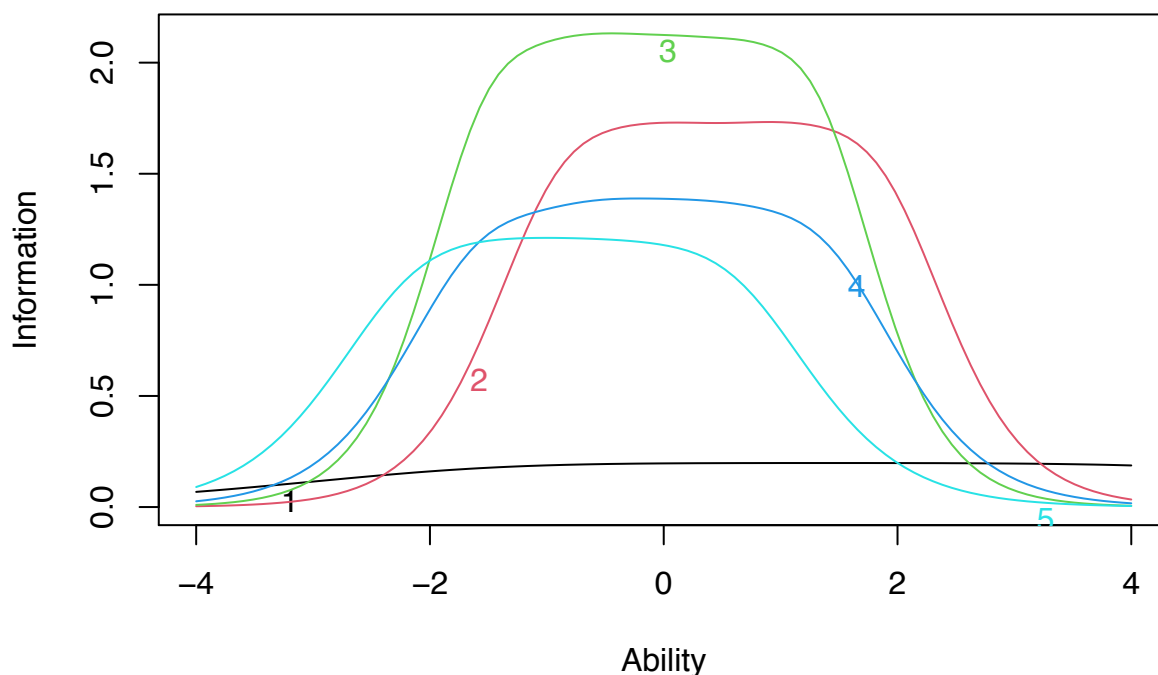

Back to top

### Site 2

#### Reliability: Hopelessness

## Cronbach's alpha is 0.812.

## Mean item-total correlation is 0.46.

## If each item were dropped:

| ##      | raw_alpha | std.alpha | G6(smc) | average_r | S/N | alpha se | var.r  | med.r |
|---------|-----------|-----------|---------|-----------|-----|----------|--------|-------|
| ## Q15  | 0.83      | 0.83      | 0.79    | 0.55      | 4.9 | 0.011    | 0.0035 | 0.56  |
| ## Q61  | 0.76      | 0.76      | 0.73    | 0.44      | 3.1 | 0.015    | 0.0308 | 0.44  |
| ## Q115 | 0.74      | 0.74      | 0.71    | 0.42      | 2.9 | 0.017    | 0.0178 | 0.46  |
| ## Q24  | 0.76      | 0.75      | 0.73    | 0.43      | 3.1 | 0.016    | 0.0208 | 0.46  |
| ## Q88  | 0.78      | 0.77      | 0.74    | 0.46      | 3.4 | 0.015    | 0.0155 | 0.49  |

## Scree Plot

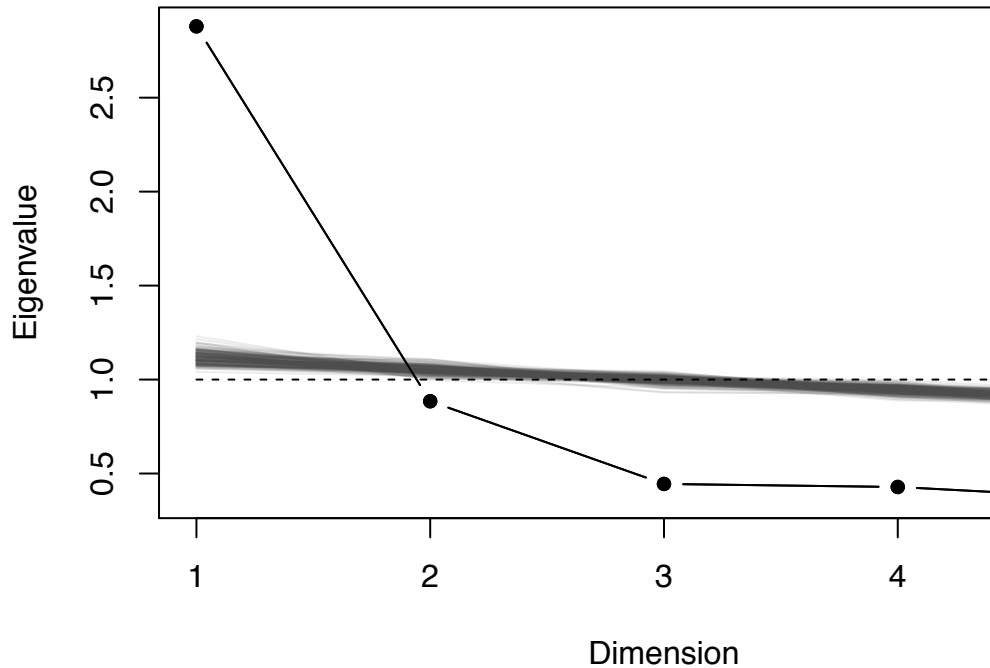

### Unidimensionality: Hopelessness

```
## [1] "Ratio of first to second eigenvalues: 3.256"
## [1] 2.8795248 0.8845061 0.4445027 0.4283331 0.3631333
## Factor Analysis using method = minres
## Call: fa(r = grm_obj$X)
## Standardized loadings (pattern matrix) based upon correlation matrix
##      MR1  h2  u2 com
## Q15  0.44 0.19 0.81  1
## Q61  0.71 0.51 0.49  1
## Q115 0.81 0.66 0.34  1
## Q24  0.76 0.57 0.43  1
## Q88  0.69 0.47 0.53  1
##
##              MR1
## SS loadings  2.40
## Proportion Var 0.48
##
## Mean item complexity = 1
## Test of the hypothesis that 1 factor is sufficient.
##
## The degrees of freedom for the null model are 10 and the objective function was 1.74 with Chi Square
## The degrees of freedom for the model are 5 and the objective function was 0.11
##
## The root mean square of the residuals (RMSR) is 0.06
## The df corrected root mean square of the residuals is 0.09
##
## The harmonic number of observations is 566 with the empirical chi square 47.63 with prob < 4.2e-
## The total number of observations was 596 with Likelihood Chi Square = 65.01 with prob < 1.1e-12
##
## Tucker Lewis Index of factoring reliability = 0.882
```

```

## RMSEA index = 0.142 and the 90 % confidence intervals are 0.112 0.174
## BIC = 33.06
## Fit based upon off diagonal values = 0.98
## Measures of factor score adequacy
##
## Correlation of (regression) scores with factors MR1 0.92
## Multiple R square of scores with factors 0.84
## Minimum correlation of possible factor scores 0.69

```

**Graded-Response Model: Hopelessness**

| ##      | Extrmt1 | Extrmt2 | Extrmt3 | Extrmt4 | Extrmt5 | Extrmt6 | Dscrmn |
|---------|---------|---------|---------|---------|---------|---------|--------|
| ## Q15  | -0.801  | 0.062   | 0.933   | 2.042   | 2.959   | 4.350   | 0.926  |
| ## Q61  | -0.387  | 0.251   | 0.693   | 1.207   | 1.732   | 2.267   | 2.014  |
| ## Q115 | -1.168  | -0.560  | -0.037  | 0.488   | 0.876   | 1.374   | 2.850  |
| ## Q24  | -1.012  | -0.349  | 0.117   | 0.521   | 0.965   | 1.481   | 2.321  |
| ## Q88  | -1.584  | -1.019  | -0.653  | -0.115  | 0.288   | 0.814   | 2.121  |

**Test Information Function**

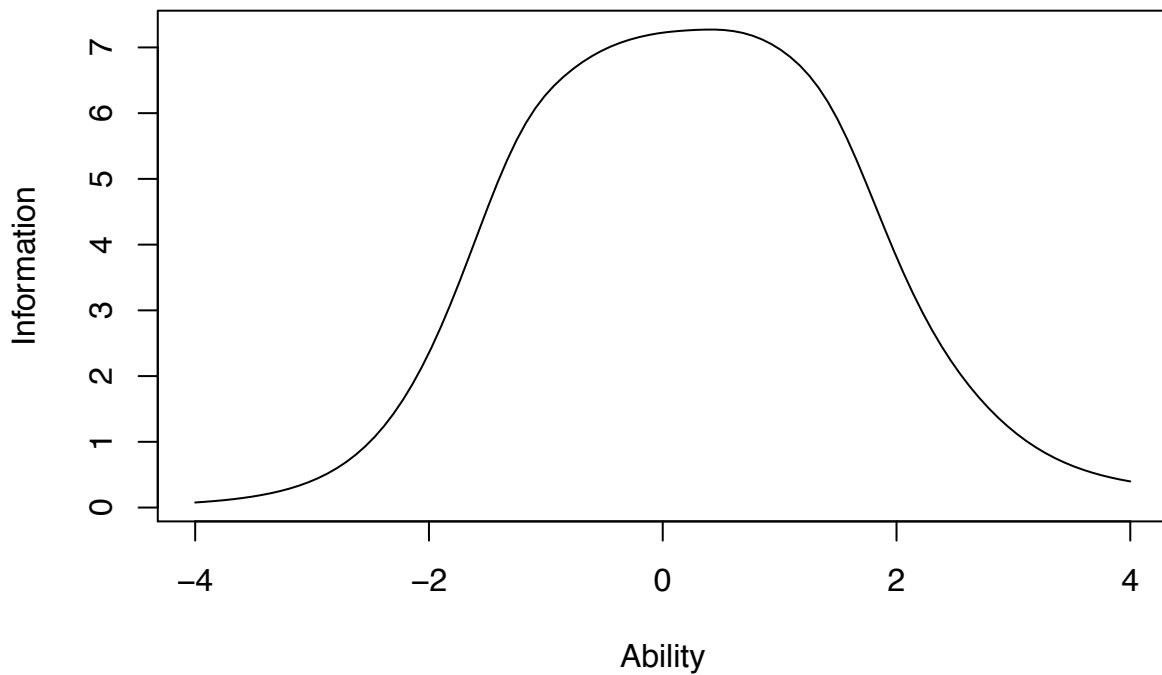

## Item Information Curves

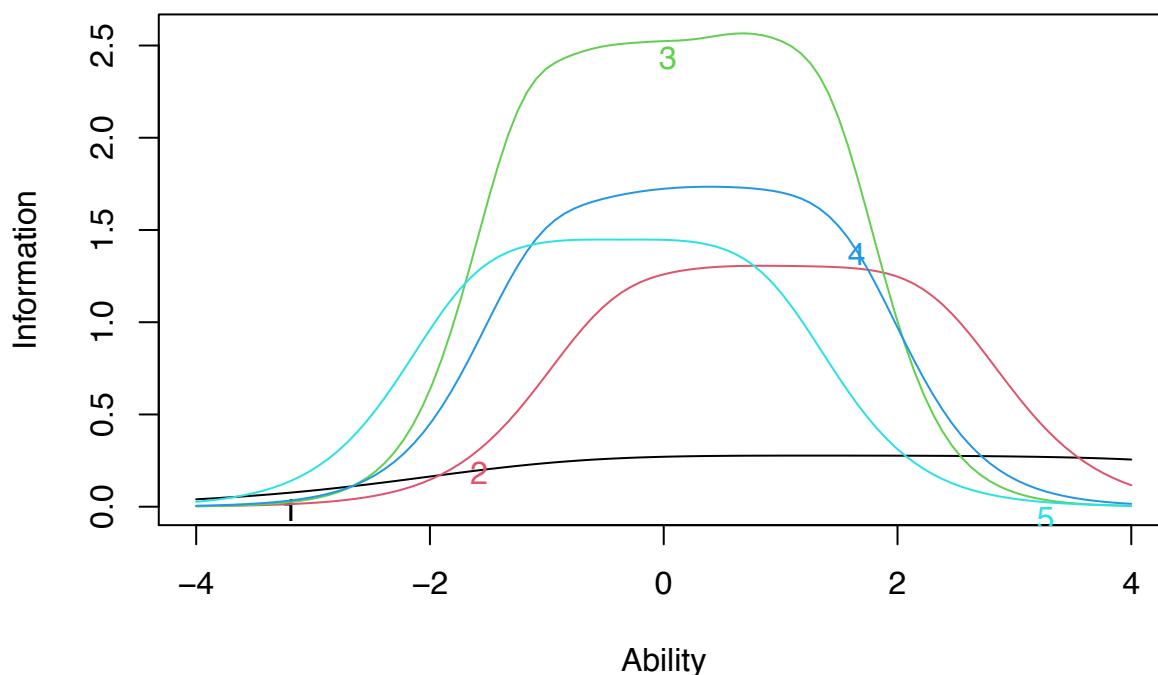

[Back to top](#)

### Site DIF

```
## Call:
## lordif::lordif(resp.data = as.data.frame(merged_data), group = site)
##
## Number of DIF groups: 2
##
## Number of items flagged for DIF: 1 of 5
##
## Items flagged: 3
##
## Number of iterations for purification: 2 of 10
##
## Detection criterion: Chisqr
##
## Threshold: alpha = 0.01
##
## item ncat chi12 chi13 chi23
## 1 1 7 0.7690 0.2831 0.1184
## 2 2 7 0.0695 0.1213 0.3364
## 3 3 7 0.0020 0.0084 0.9961
## 4 4 7 0.6814 0.5746 0.3324
## 5 5 7 0.9635 0.4093 0.1816
```

## Trait Distributions

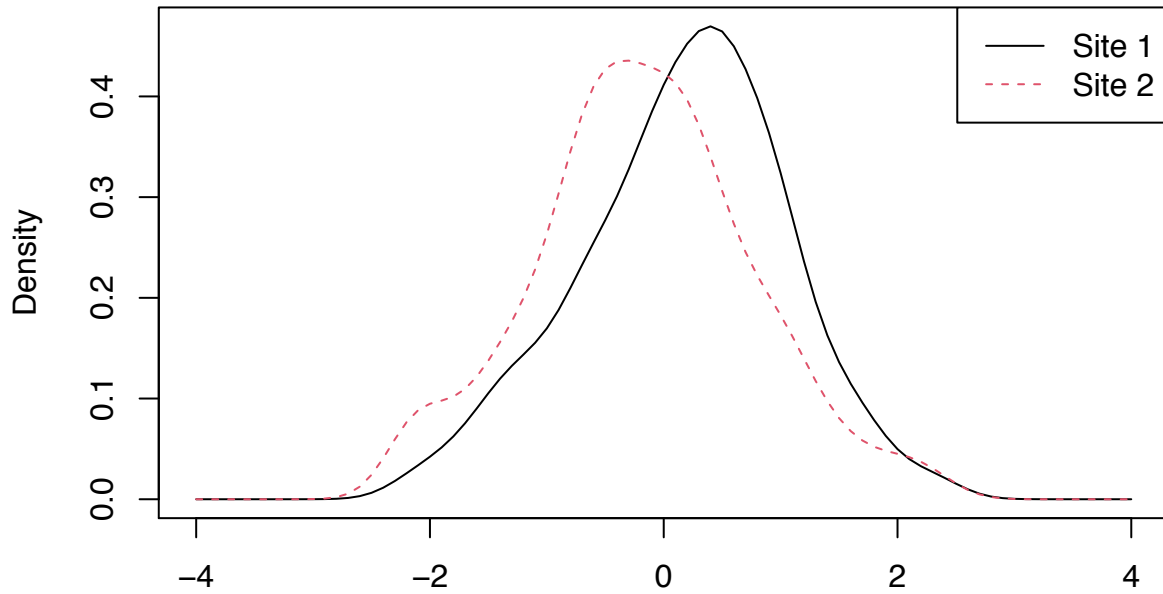

### Item True Score Functions – Item 3

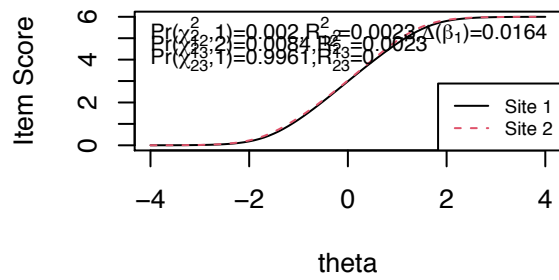

### Differences in Item True Score Function

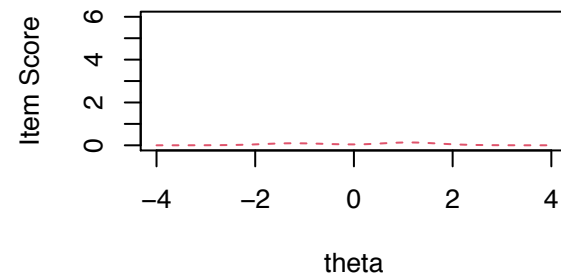

### Item Response Functions

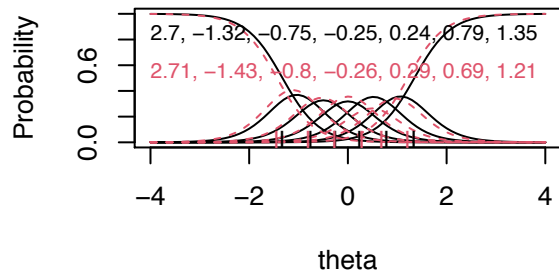

### Impact (Weighted by Density)

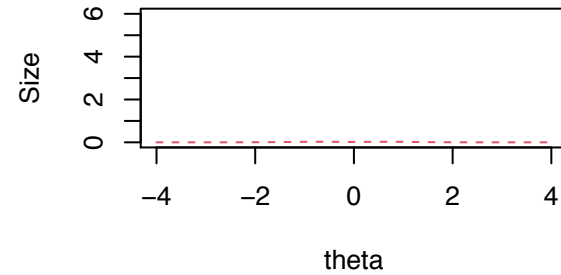

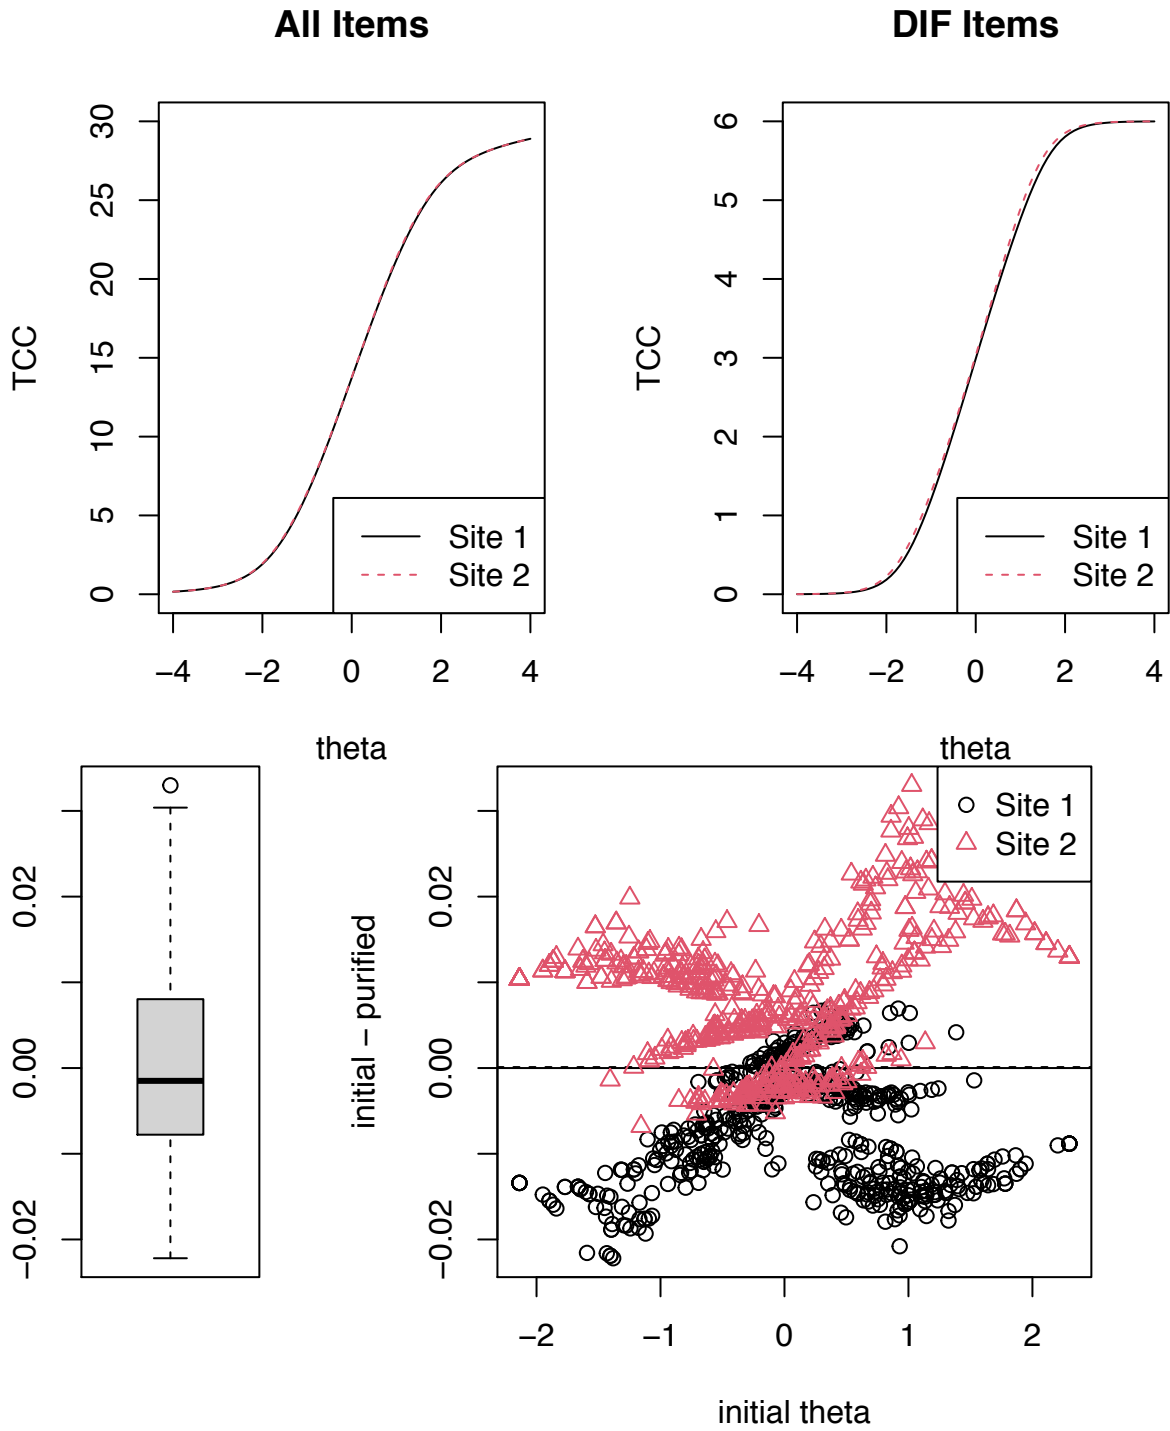

Back to top

### Gender-based DIF: Hopelessness

```
## Call:
## lordif::lordif(resp.data = as.data.frame(sex.data), group = sex)
##
## Number of DIF groups: 2
```

```
##
## Number of items flagged for DIF: 1 of 5
##
## Items flagged: 2
##
## Number of iterations for purification: 2 of 10
##
## Detection criterion: Chisqr
##
## Threshold: alpha = 0.01
##
## item ncat chi12 chi13 chi23
## 1 1 7 0.1092 0.1791 0.3499
## 2 2 7 0.0000 0.0000 0.4704
## 3 3 7 0.4284 0.3726 0.2457
## 4 4 7 0.1036 0.2632 0.8874
## 5 5 7 0.6145 0.8328 0.7375
```

### Trait Distributions

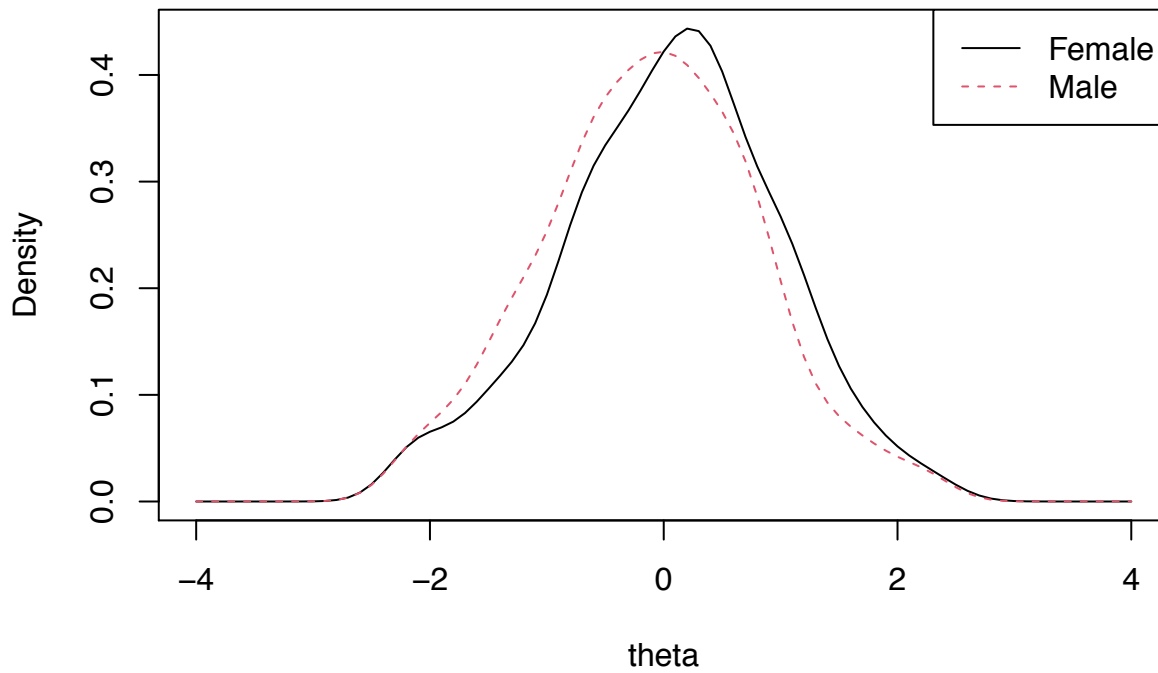



**Item True Score Functions – Item 2**

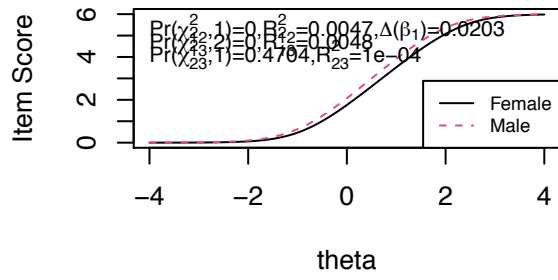

**Differences in Item True Score Function**

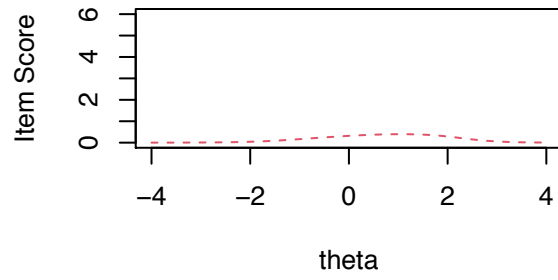

**Item Response Functions**

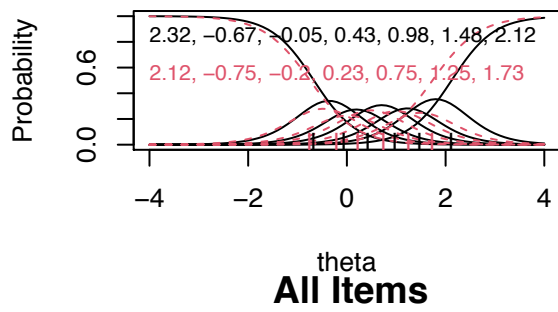

**Impact (Weighted by Density)**

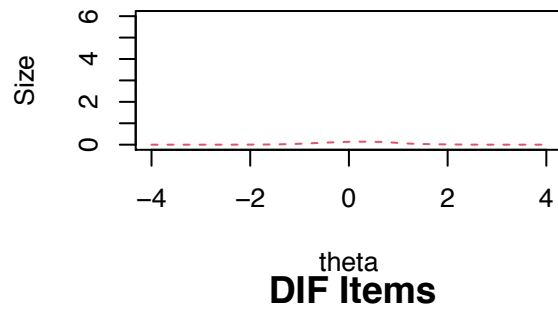

**All Items**

**DIF Items**

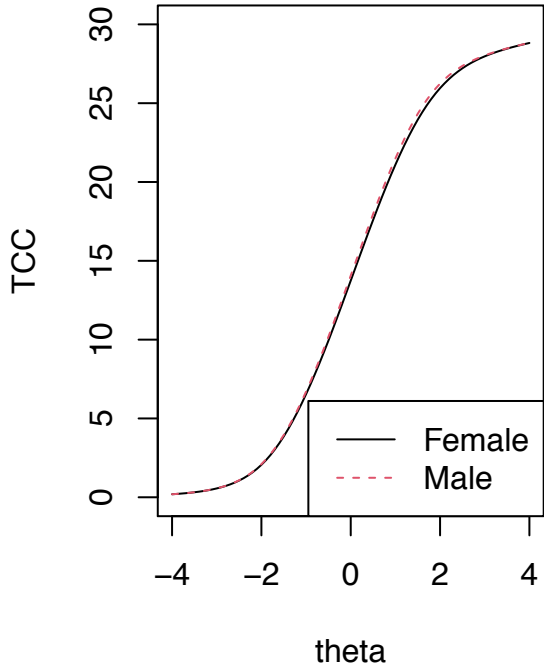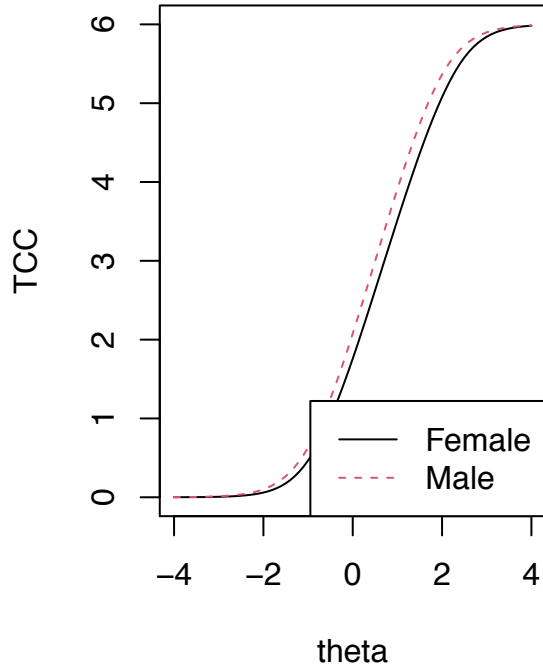

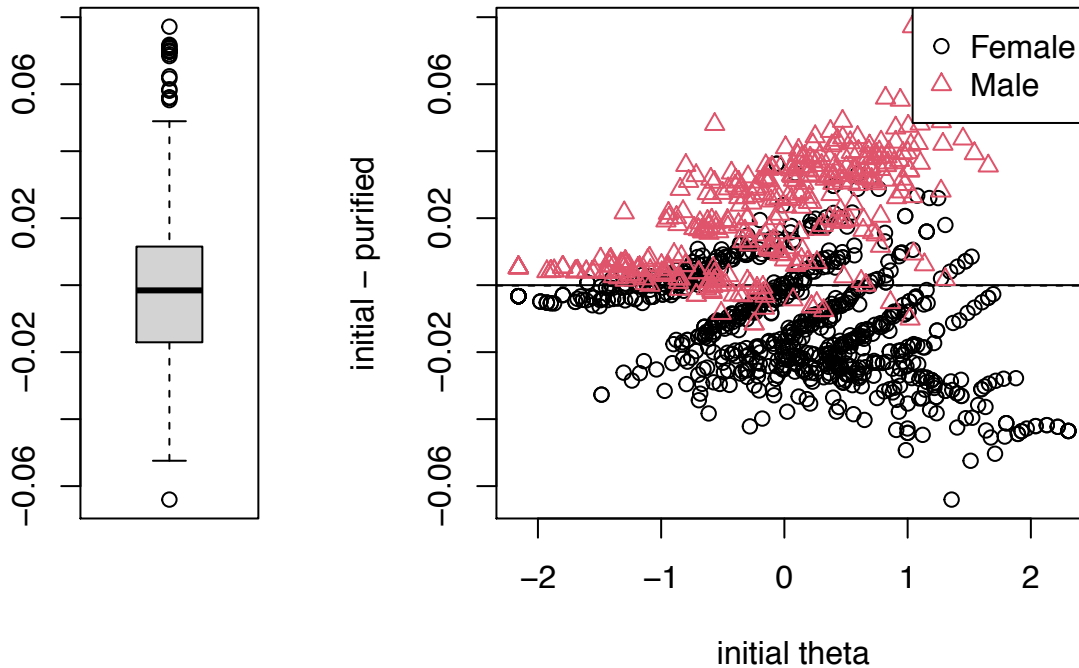

### Age-based DIF: Hopelessness

```
## Call:
## lordif::lordif(resp.data = as.data.frame(age.data), group = age)
##
## Number of DIF groups: 2
##
## Number of items flagged for DIF: 0 of 5
##
## Items flagged:
##
## Number of iterations for purification: 1 of 10
##
## Detection criterion: Chisqr
##
## Threshold: alpha = 0.01
```

Back to top

## Internal Avoidance

### Site 1

#### Reliability: Internal Avoidance

```
## Cronbach's alpha is 0.733.
## Mean item-total correlation is 0.348.
## If each item were dropped:
## raw_alpha std.alpha G6(smc) average_r S/N alpha se var.r med.r
## Q10 0.78 0.78 0.73 0.47 3.5 0.015 0.0081 0.45
## Q34 0.62 0.62 0.57 0.29 1.6 0.024 0.0181 0.28
```

```
## Q78      0.70      0.69      0.67      0.36 2.2      0.020 0.0373  0.33
## Q122     0.66      0.65      0.62      0.32 1.9      0.022 0.0348  0.30
## Q123     0.65      0.64      0.61      0.31 1.8      0.023 0.0303  0.28
```

### Scree Plot

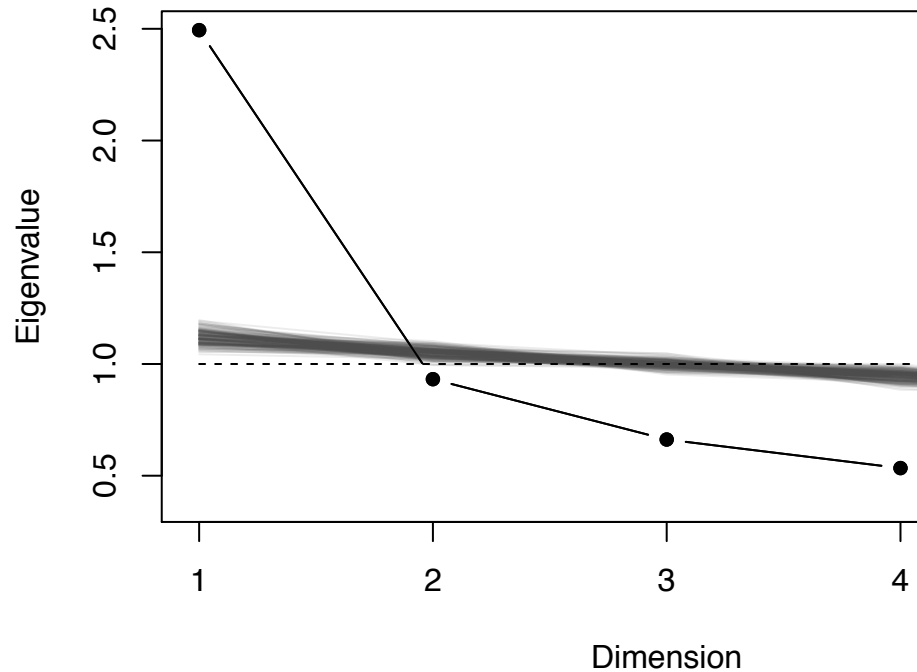

### Unidimensionality: Internal Avoidance

```
## [1] "Ratio of first to second eigenvalues: 2.676"
## [1] 2.4939949 0.9320973 0.6619944 0.5341351 0.3777783

## Factor Analysis using method = minres
## Call: fa(r = grm_obj$X)
## Standardized loadings (pattern matrix) based upon correlation matrix
##      MR1    h2    u2 com
## Q10  0.25 0.061 0.94  1
## Q34  0.82 0.678 0.32  1
## Q78  0.55 0.303 0.70  1
## Q122 0.67 0.446 0.55  1
## Q123 0.71 0.497 0.50  1
##
##              MR1
## SS loadings  1.99
## Proportion Var 0.40
##
## Mean item complexity = 1
## Test of the hypothesis that 1 factor is sufficient.
##
## The degrees of freedom for the null model are 10 and the objective function was 1.17 with Chi Squa
## The degrees of freedom for the model are 5 and the objective function was 0.02
##
## The root mean square of the residuals (RMSR) is 0.03
## The df corrected root mean square of the residuals is 0.04
```

```

##
## The harmonic number of observations is 567 with the empirical chi square 7.15 with prob < 0.21
## The total number of observations was 617 with Likelihood Chi Square = 10.76 with prob < 0.056
##
## Tucker Lewis Index of factoring reliability = 0.984
## RMSEA index = 0.043 and the 90 % confidence intervals are 0 0.079
## BIC = -21.36
## Fit based upon off diagonal values = 1
## Measures of factor score adequacy
##
##                                     MR1
## Correlation of (regression) scores with factors 0.90
## Multiple R square of scores with factors 0.81
## Minimum correlation of possible factor scores 0.63

```

**Graded-Response Model: Internal Avoidance**

|         | Extrmt1 | Extrmt2 | Extrmt3 | Extrmt4 | Extrmt5 | Extrmt6 | Dscrmm |
|---------|---------|---------|---------|---------|---------|---------|--------|
| ## Q10  | -5.076  | -3.744  | -1.704  | -0.062  | 1.351   | 3.583   | 0.477  |
| ## Q34  | -1.548  | -0.913  | -0.526  | -0.140  | 0.369   | 0.881   | 2.888  |
| ## Q78  | -2.058  | -1.288  | -0.752  | -0.076  | 0.548   | 1.326   | 1.316  |
| ## Q122 | -1.403  | -0.883  | -0.361  | 0.180   | 0.715   | 1.301   | 1.800  |
| ## Q123 | -1.641  | -0.975  | -0.648  | -0.143  | 0.427   | 1.030   | 1.866  |

**Test Information Function**

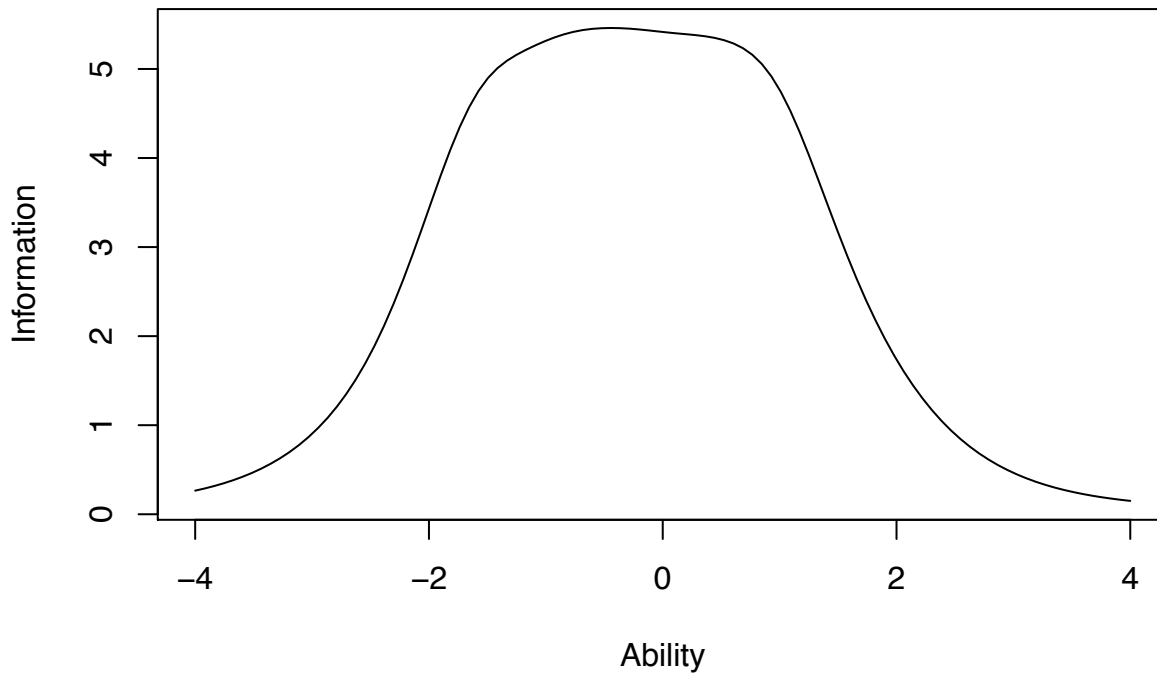

## Item Information Curves

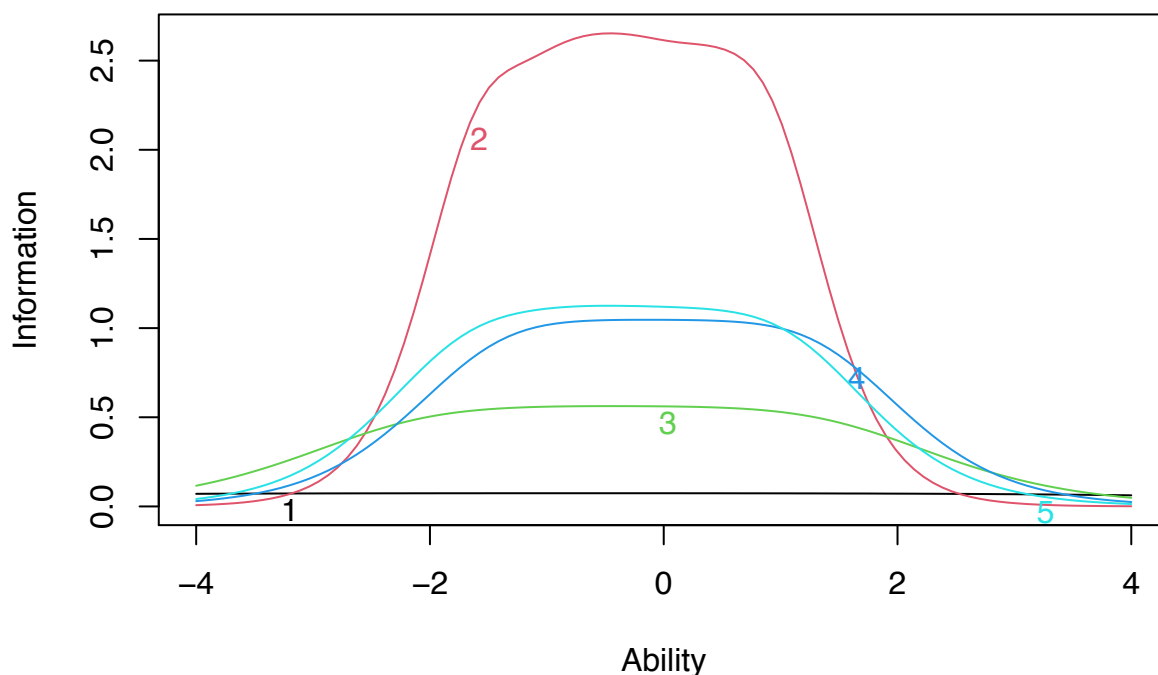

Back to top

### Site 2

#### Reliability: Internal Avoidance

## Cronbach's alpha is 0.761.

## Mean item-total correlation is 0.381.

## If each item were dropped:

| ##      | raw_alpha | std.alpha | G6(smc) | average_r | S/N | alpha | se    | var.r | med.r |
|---------|-----------|-----------|---------|-----------|-----|-------|-------|-------|-------|
| ## Q10  | 0.79      | 0.79      | 0.76    | 0.49      | 3.9 | 0.014 | 0.013 | 0.50  |       |
| ## Q34  | 0.66      | 0.65      | 0.61    | 0.32      | 1.9 | 0.023 | 0.021 | 0.31  |       |
| ## Q78  | 0.75      | 0.74      | 0.71    | 0.42      | 2.9 | 0.017 | 0.036 | 0.41  |       |
| ## Q122 | 0.68      | 0.67      | 0.64    | 0.34      | 2.0 | 0.021 | 0.028 | 0.31  |       |
| ## Q123 | 0.68      | 0.68      | 0.65    | 0.35      | 2.1 | 0.021 | 0.029 | 0.31  |       |

## Scree Plot

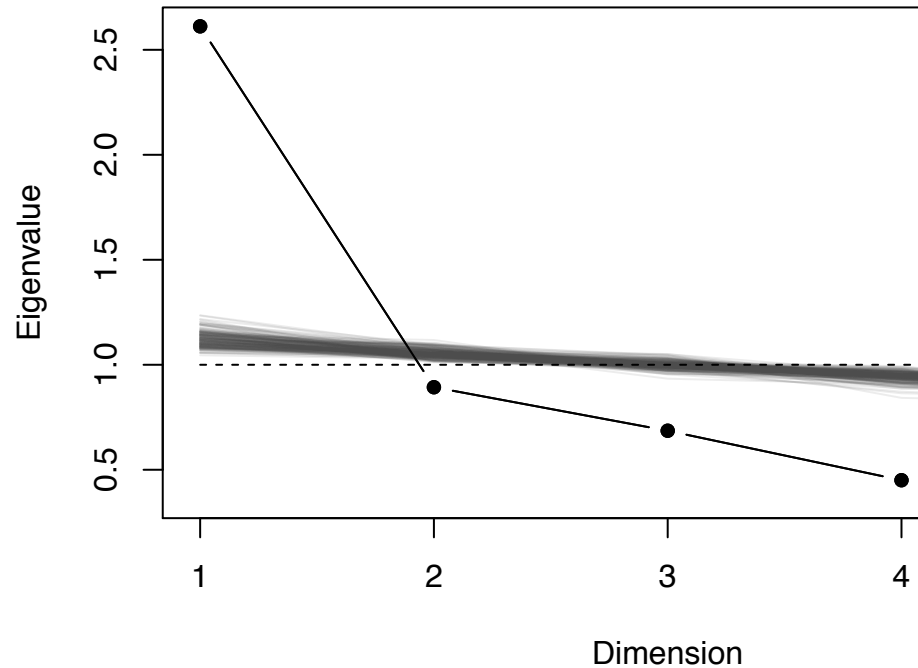

### Unidimensionality: Internal Avoidance

```
## [1] "Ratio of first to second eigenvalues: 2.925"
## [1] 2.6116558 0.8929579 0.6857242 0.4501308 0.3595313
## Factor Analysis using method = minres
## Call: fa(r = grm_obj$X)
## Standardized loadings (pattern matrix) based upon correlation matrix
##      MR1   h2   u2 com
## Q10  0.31 0.097 0.90  1
## Q34  0.83 0.694 0.31  1
## Q78  0.51 0.257 0.74  1
## Q122 0.75 0.561 0.44  1
## Q123 0.73 0.527 0.47  1
##
##              MR1
## SS loadings   2.14
## Proportion Var 0.43
##
## Mean item complexity = 1
## Test of the hypothesis that 1 factor is sufficient.
##
## The degrees of freedom for the null model are 10 and the objective function was 1.35 with Chi Squa
## The degrees of freedom for the model are 5 and the objective function was 0.01
##
## The root mean square of the residuals (RMSR) is 0.02
## The df corrected root mean square of the residuals is 0.02
##
## The harmonic number of observations is 542 with the empirical chi square 3.12 with prob < 0.68
## The total number of observations was 596 with Likelihood Chi Square = 5.24 with prob < 0.39
##
## Tucker Lewis Index of factoring reliability = 0.999
```

```

## RMSEA index = 0.009 and the 90 % confidence intervals are 0 0.058
## BIC = -26.71
## Fit based upon off diagonal values = 1
## Measures of factor score adequacy
##
## Correlation of (regression) scores with factors MR1 0.91
## Multiple R square of scores with factors 0.84
## Minimum correlation of possible factor scores 0.67

```

**Graded-Response Model: Internal Avoidance**

| ##      | Extrmt1 | Extrmt2 | Extrmt3 | Extrmt4 | Extrmt5 | Extrmt6 | Dscrmn |
|---------|---------|---------|---------|---------|---------|---------|--------|
| ## Q10  | 2.978   | 1.889   | 0.736   | -0.634  | -2.056  | -3.669  | -0.666 |
| ## Q34  | 1.203   | 0.682   | 0.252   | -0.178  | -0.645  | -1.112  | -3.012 |
| ## Q78  | 2.165   | 1.275   | 0.521   | -0.180  | -0.957  | -1.771  | -1.118 |
| ## Q122 | 1.198   | 0.618   | 0.144   | -0.336  | -0.792  | -1.412  | -2.279 |
| ## Q123 | 1.397   | 0.771   | 0.362   | -0.093  | -0.587  | -1.066  | -2.129 |

**Test Information Function**

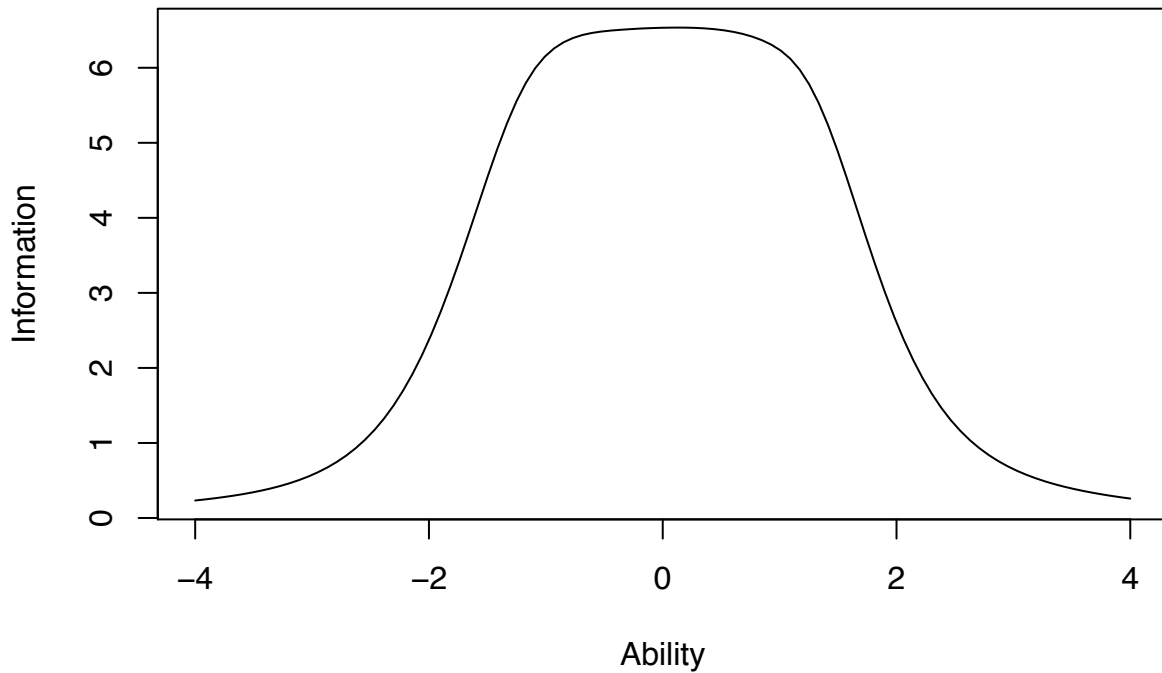

## Item Information Curves

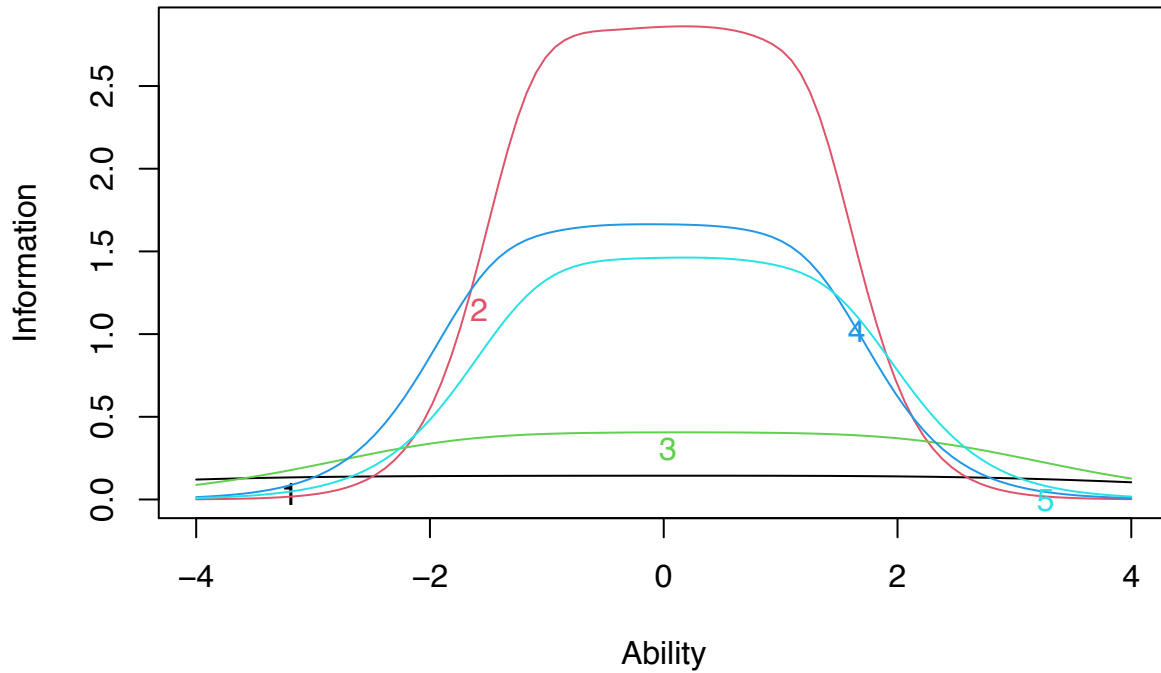

[Back to top](#)

### Site DIF

```
## Call:
## lordif::lordif(resp.data = as.data.frame(merged_data), group = site)
##
## Number of DIF groups: 2
##
## Number of items flagged for DIF: 1 of 5
##
## Items flagged: 1
##
## Number of iterations for purification: 2 of 10
##
## Detection criterion: Chisqr
##
## Threshold: alpha = 0.01
##
## item ncat chi12 chi13 chi23
## 1 1 7 0.0080 0.0182 0.3231
## 2 2 7 0.1544 0.2378 0.3581
## 3 3 7 0.5892 0.2471 0.1135
## 4 4 7 0.2460 0.4601 0.6494
## 5 5 7 0.3006 0.5603 0.7682
```



## Trait Distributions

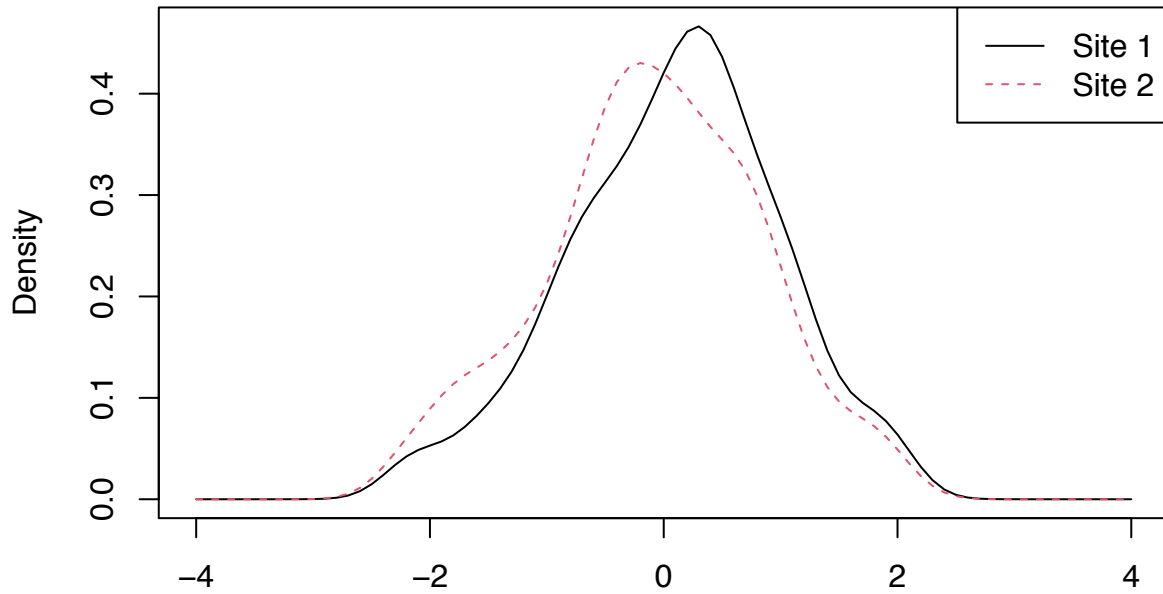

theta

**Item True Score Functions – Item 1      Differences in Item True Score Function**

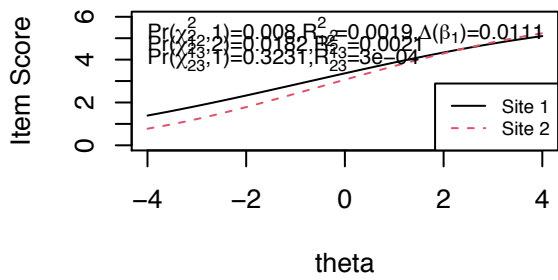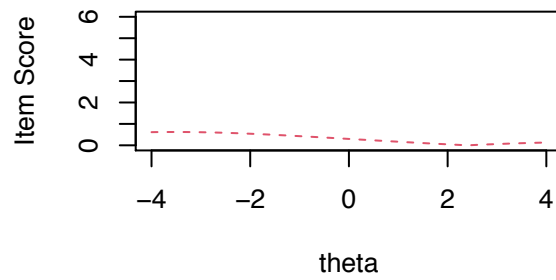

**Item Response Functions**

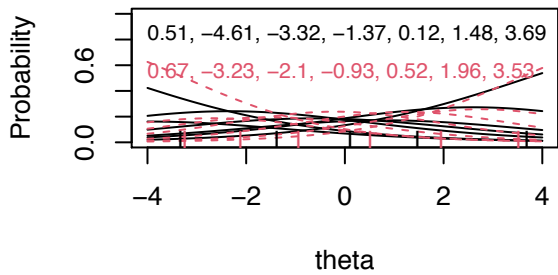

**Impact (Weighted by Density)**

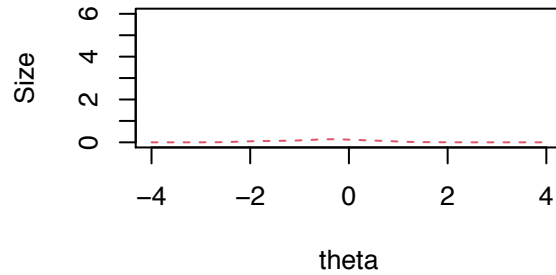

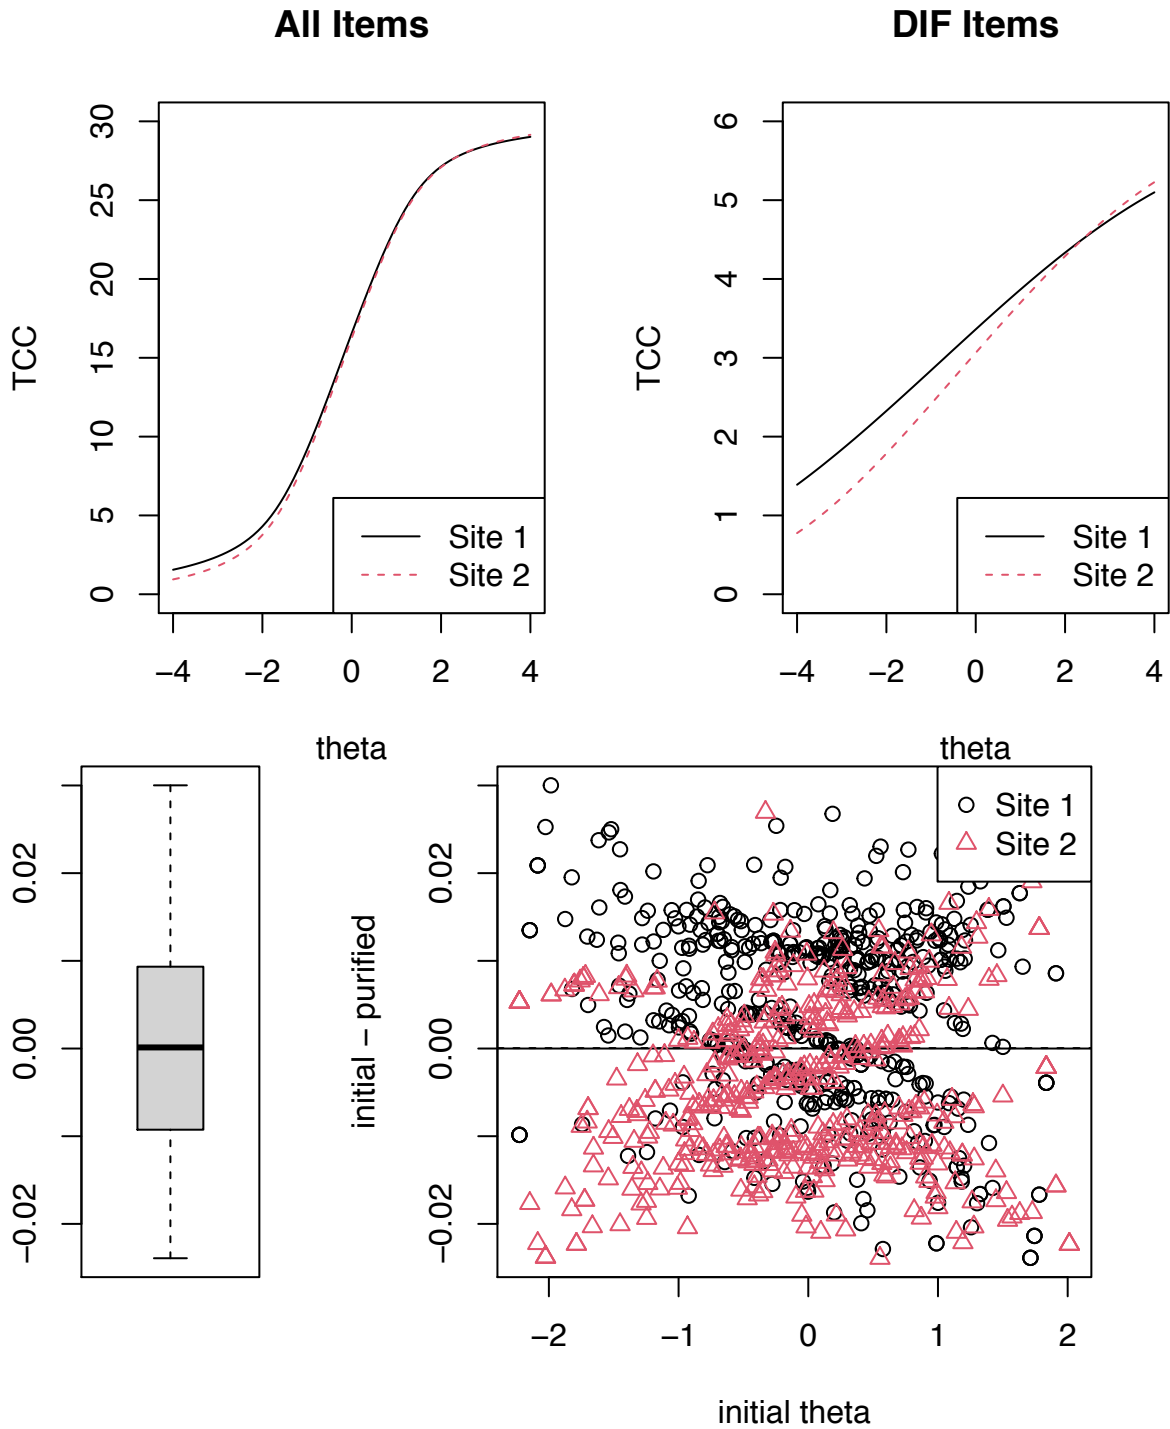

Back to top

### Gender-based DIF: Internal Avoidance

```
## Call:
## lordif::lordif(resp.data = as.data.frame(sex.data), group = sex)
##
## Number of DIF groups: 2
```

```

##
## Number of items flagged for DIF: 2 of 5
##
## Items flagged: 4, 5
##
## Number of iterations for purification: 2 of 10
##
## Detection criterion: Chisqr
##
## Threshold: alpha = 0.01
##
## item ncat chi12 chi13 chi23
## 1 1 7 0.7329 0.8544 0.6562
## 2 2 7 0.9395 0.9899 0.9043
## 3 3 7 0.4268 0.6522 0.6364
## 4 4 7 0.0000 0.0000 0.9679
## 5 5 7 0.0003 0.0014 0.9609

```

### Trait Distributions

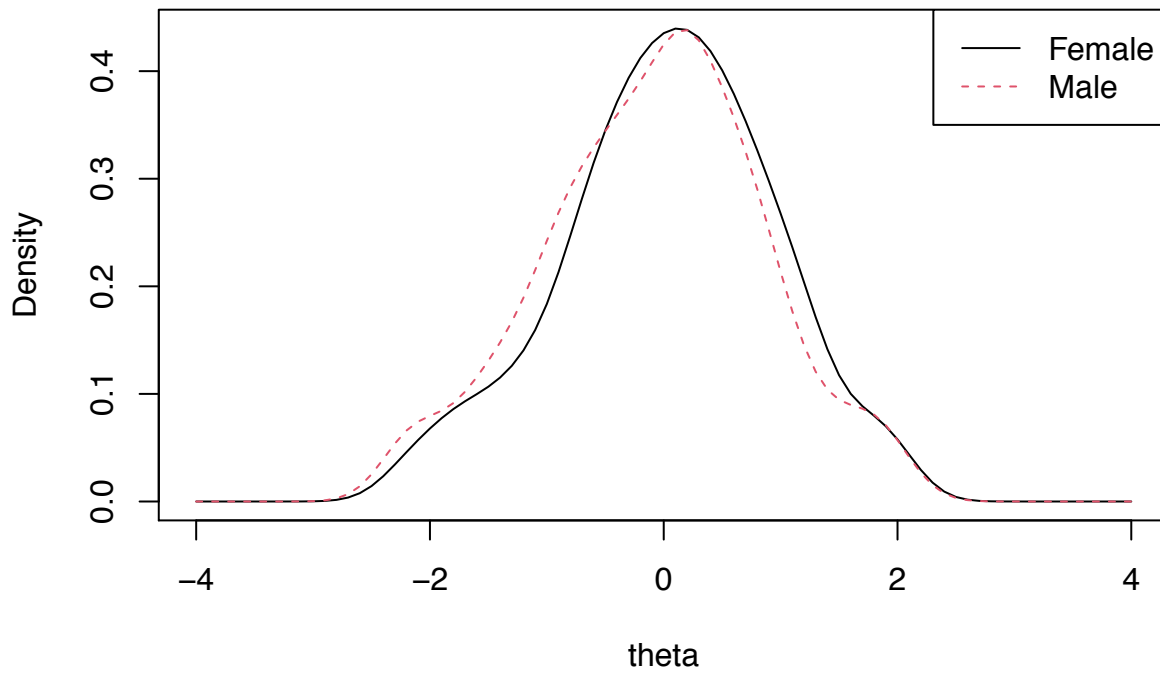

### Item True Score Functions – Item 4

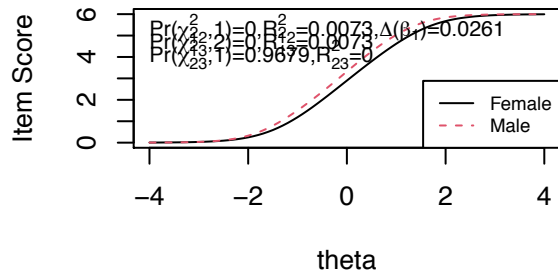

### Differences in Item True Score Function

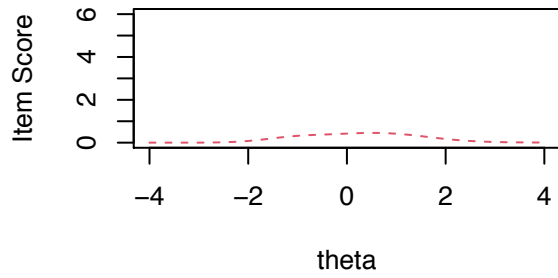

### Item Response Functions

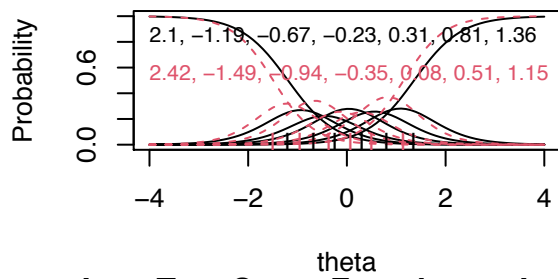

### Impact (Weighted by Density)

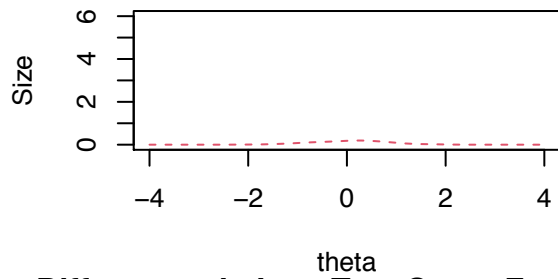

### Item True Score Functions – Item 5

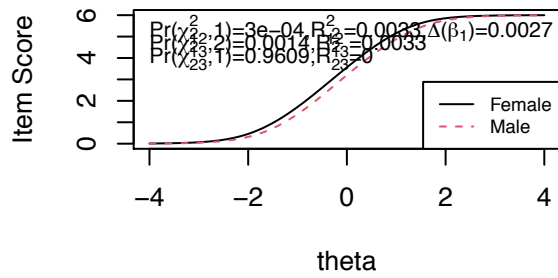

### Differences in Item True Score Function

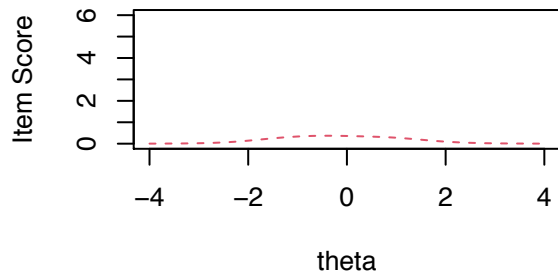

### Item Response Functions

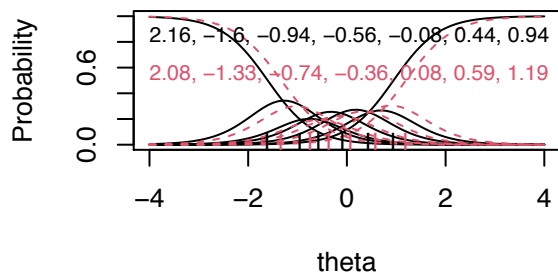

### Impact (Weighted by Density)

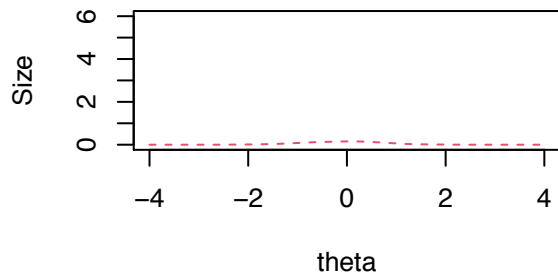

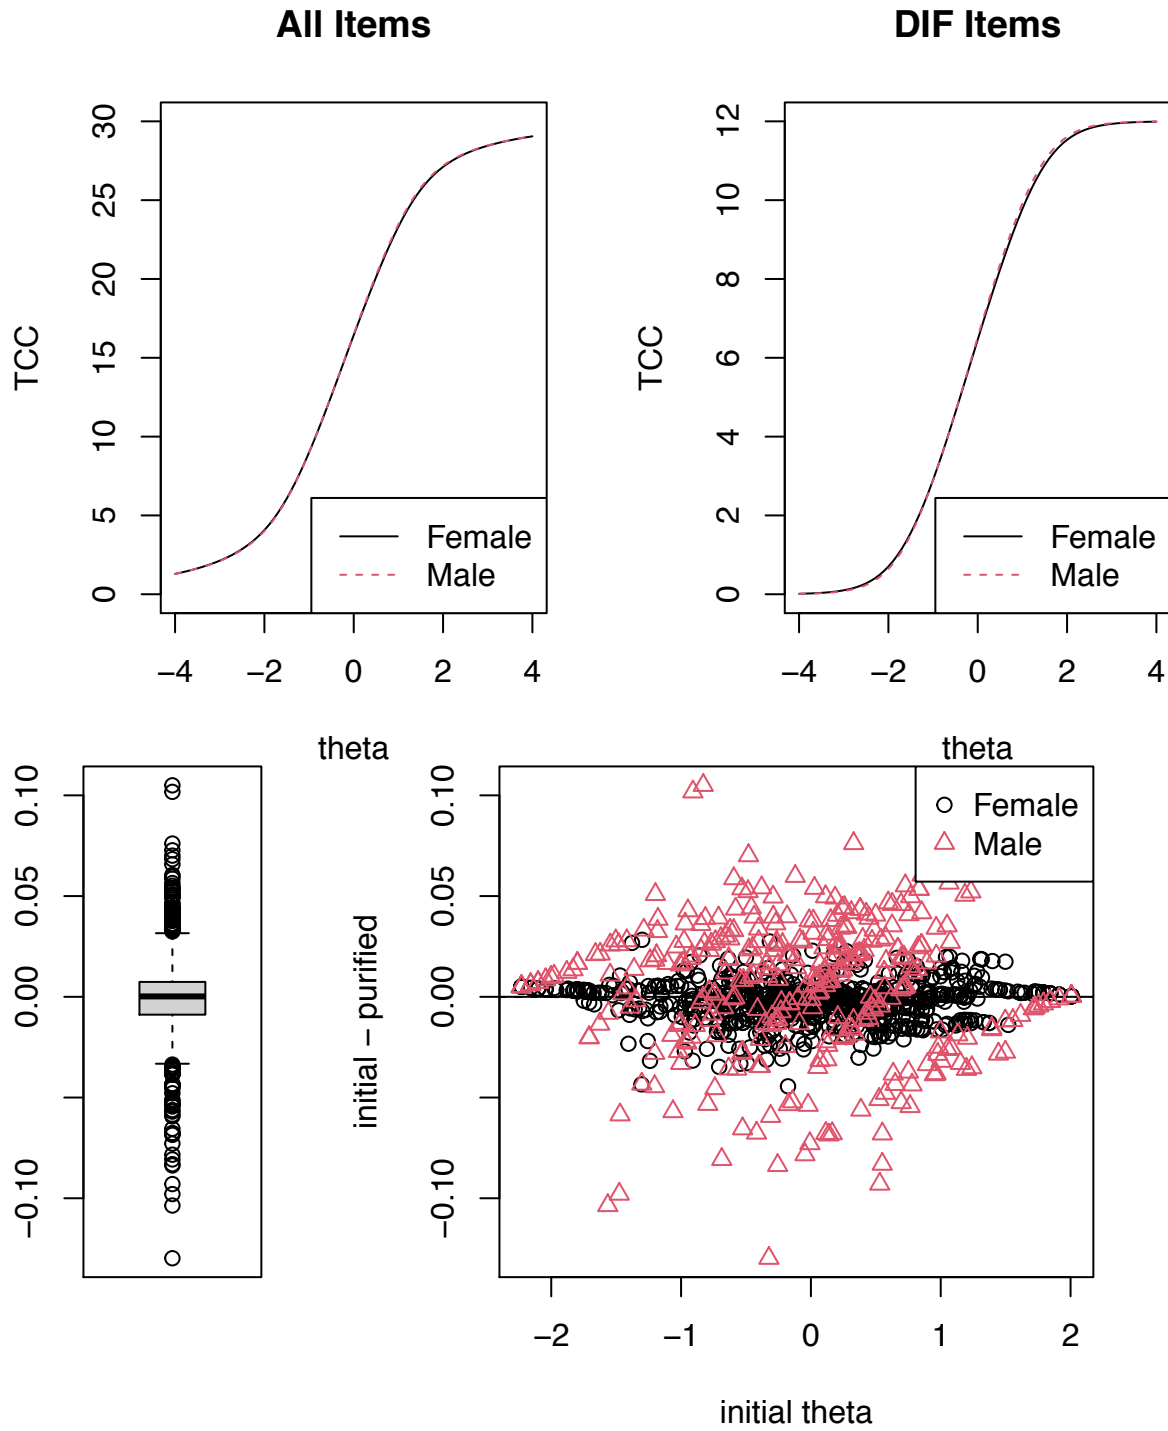

Age-based DIF: Internal Avoidance

```
## Call:
## lordif::lordif(resp.data = as.data.frame(age.data), group = age)
##
## Number of DIF groups: 2
##
```

```
## Number of items flagged for DIF: 1 of 5
##
## Items flagged: 1
##
## Number of iterations for purification: 2 of 10
##
## Detection criterion: Chisqr
##
## Threshold: alpha = 0.01
##
## item ncat chi12 chi13 chi23
## 1 1 7 0.0001 0.0003 0.4479
## 2 2 7 0.3786 0.6404 0.7333
## 3 3 7 0.3468 0.6054 0.7305
## 4 4 7 0.8914 0.8869 0.6379
## 5 5 7 0.0768 0.1975 0.7376
```

### Trait Distributions

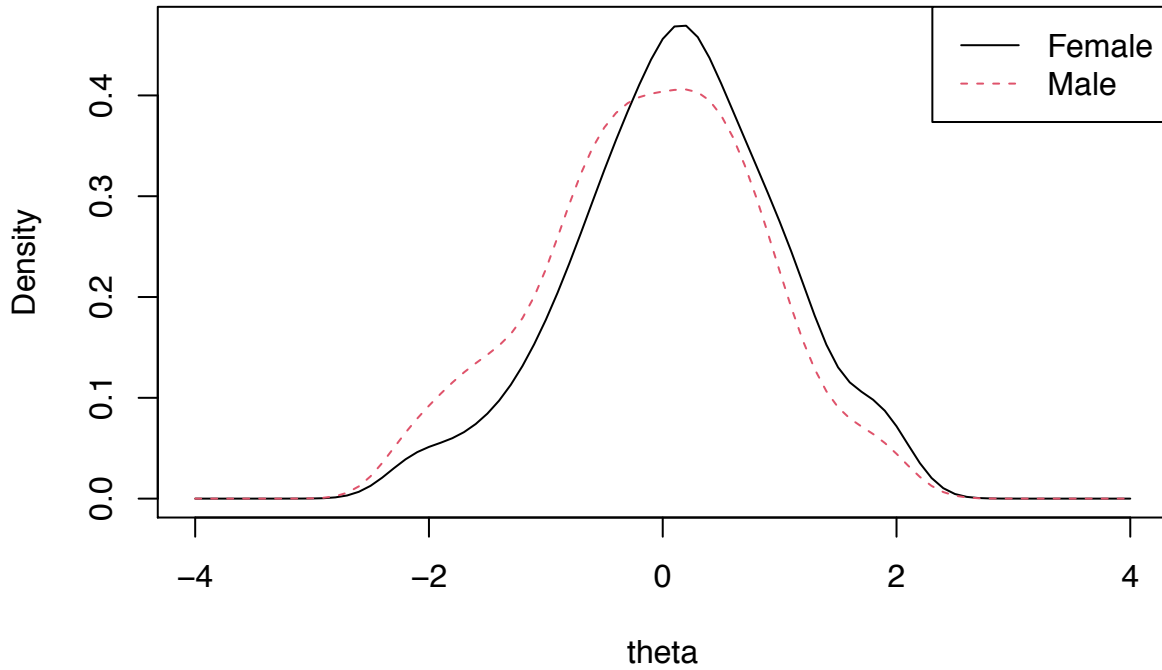

**Item True Score Functions – Item 1**

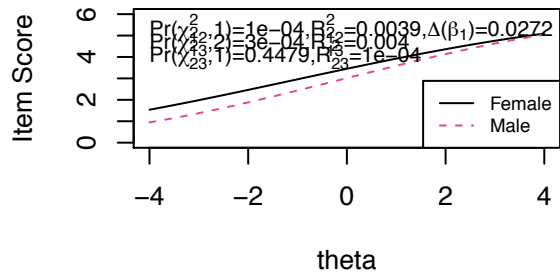

**Differences in Item True Score Function**

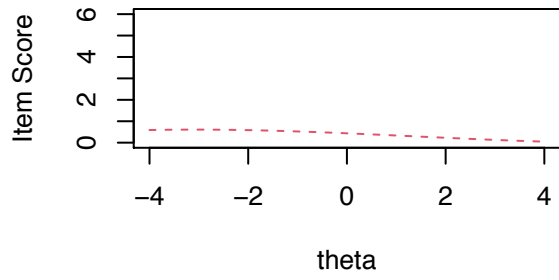

**Item Response Functions**

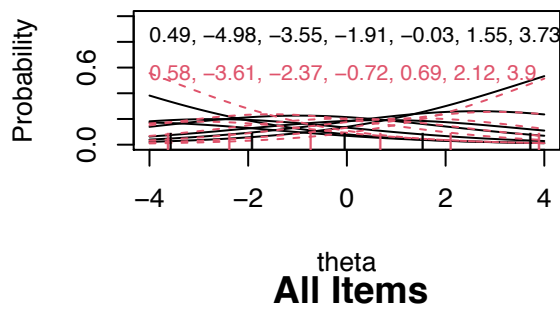

**Impact (Weighted by Density)**

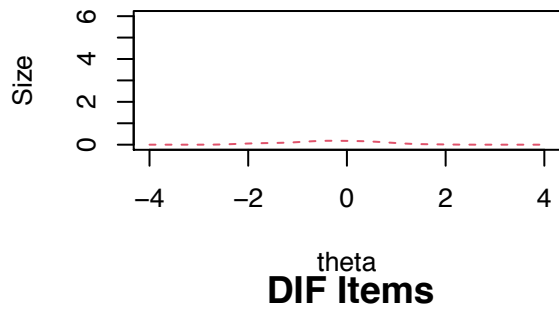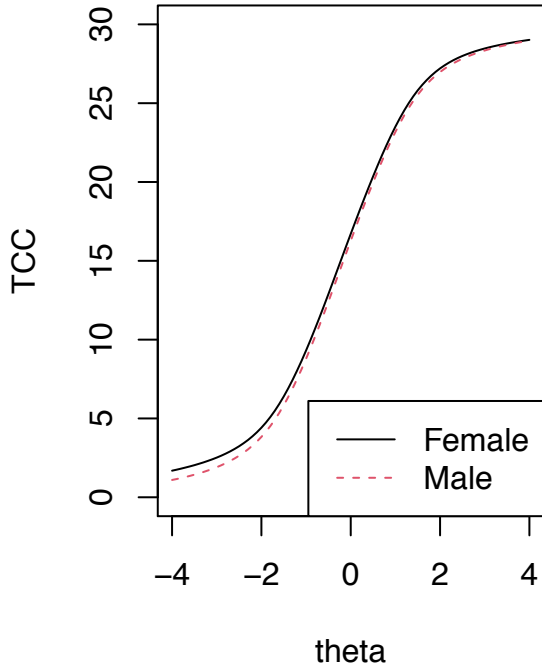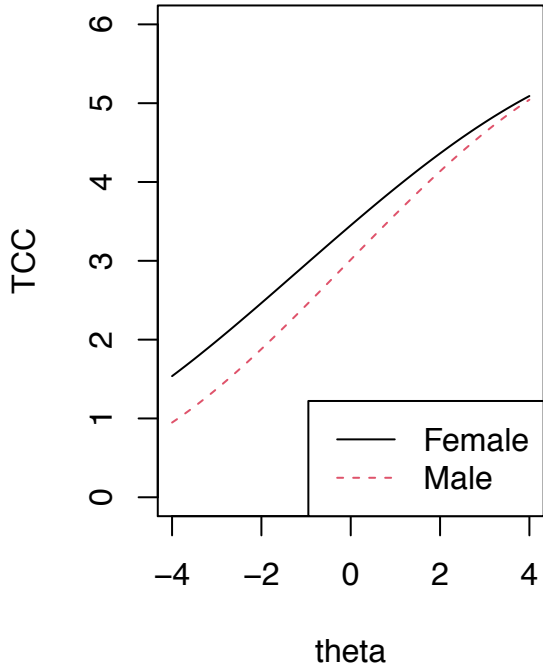

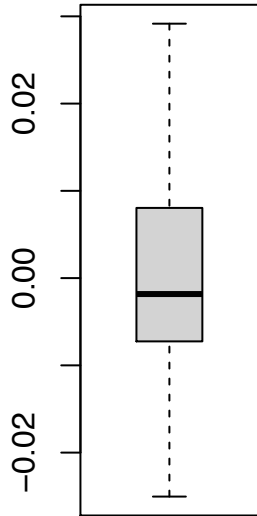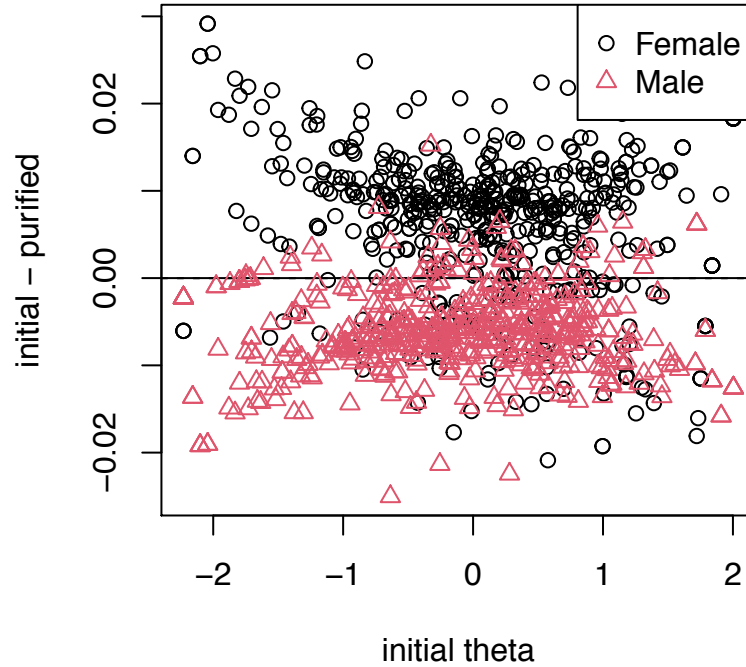

Back to top

## Irritability

Site 1

### Reliability: Irritability

```
## Cronbach's alpha is 0.45.
## Mean item-total correlation is 0.22.
## If each item were dropped:
##   raw_alpha std.alpha G6(smc) average_r S/N alpha se var.r med.r
## Q37      0.38    0.38   0.23    0.23 0.61  0.050  NA  0.23
## Q114     0.46    0.46   0.30    0.30 0.87  0.043  NA  0.30
## Q65      0.22    0.22   0.12    0.12 0.28  0.063  NA  0.12
```



## Scree Plot

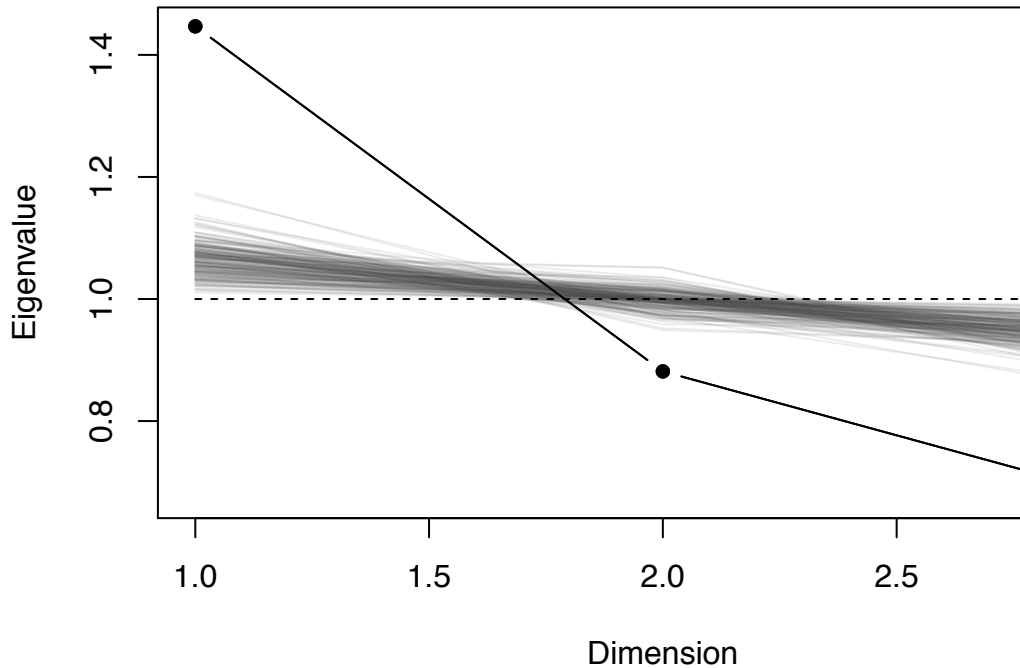

### Unidimensionality: Irritability

```
## [1] "Ratio of first to second eigenvalues: 1.642"
## [1] 1.4467859 0.8813400 0.6718741
## Factor Analysis using method = minres
## Call: fa(r = grm_obj$X)
## Standardized loadings (pattern matrix) based upon correlation matrix
##      MR1    h2    u2 com
## Q37  0.40 0.158 0.84  1
## Q114 0.31 0.096 0.90  1
## Q65  0.76 0.573 0.43  1
##
##              MR1
## SS loadings    0.83
## Proportion Var 0.28
##
## Mean item complexity = 1
## Test of the hypothesis that 1 factor is sufficient.
##
## The degrees of freedom for the null model are 3 and the objective function was 0.15 with Chi Square
## The degrees of freedom for the model are 0 and the objective function was 0
##
## The root mean square of the residuals (RMSR) is 0
## The df corrected root mean square of the residuals is NA
##
## The harmonic number of observations is 580 with the empirical chi square 0 with prob < NA
## The total number of observations was 617 with Likelihood Chi Square = 0 with prob < NA
##
## Tucker Lewis Index of factoring reliability = -Inf
## Fit based upon off diagonal values = 1
## Measures of factor score adequacy
```

```
##                                     MR1
## Correlation of (regression) scores with factors 0.79
## Multiple R square of scores with factors 0.62
## Minimum correlation of possible factor scores 0.24
```

**Graded-Response Model: Irritability**

```
##      Extrmt1 Extrmt2 Extrmt3 Extrmt4 Extrmt5 Extrmt6 Dscrmm
## Q37  -3.013  -1.493  -0.510   0.211   1.123   2.158   0.823
## Q114 -0.386   0.857   1.726   2.639   3.518   4.816   0.707
## Q65  -0.345   0.409   0.849   1.366   1.937   2.456   2.439
```

**Test Information Function**

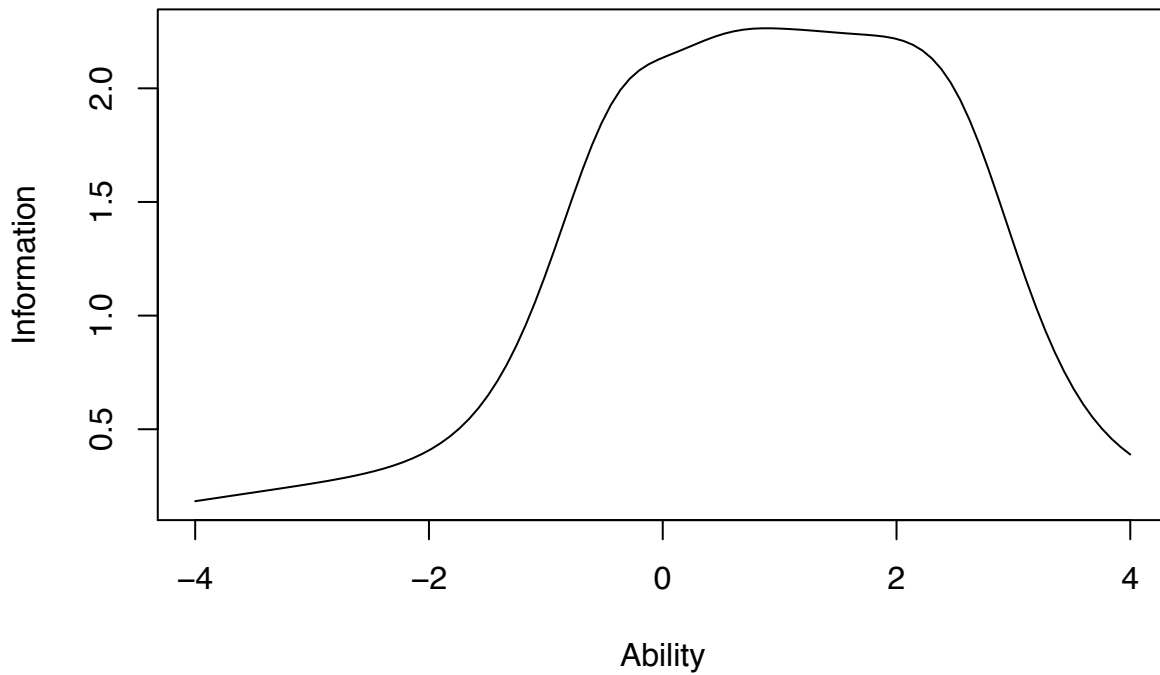

## Item Information Curves

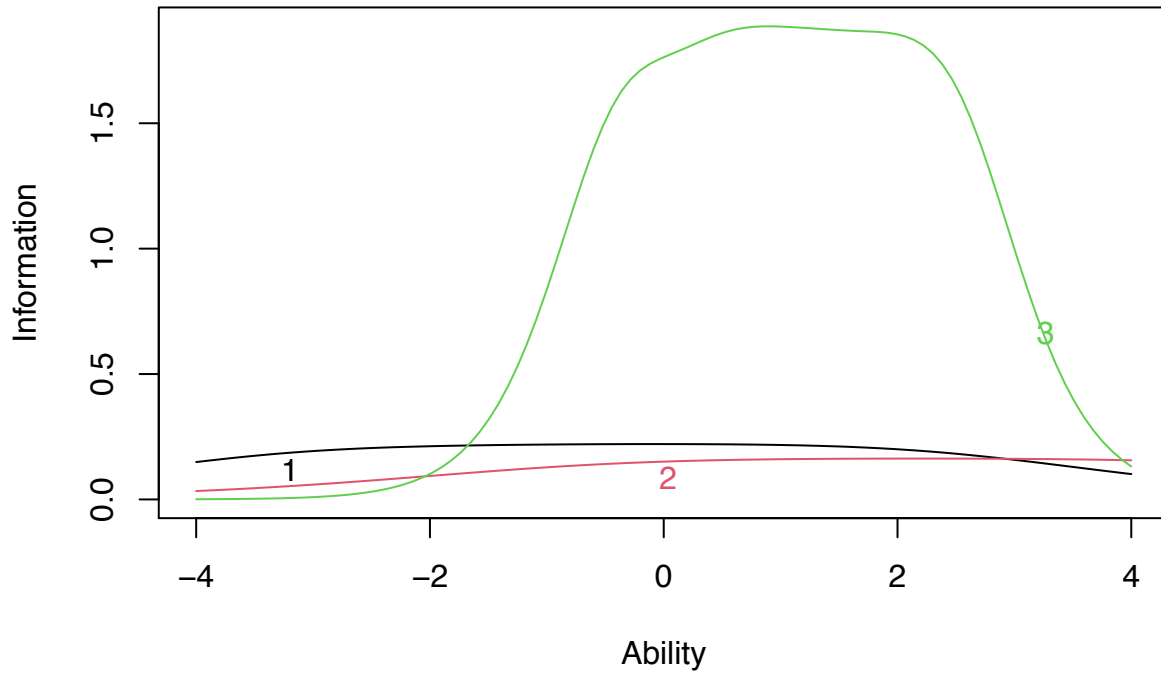

Back to top

### Site 2

#### Reliability: Irritability

## Cronbach's alpha is 0.448.

## Mean item-total correlation is 0.227.

## If each item were dropped:

| ##      | raw_alpha | std.alpha | G6(smc) | average_r | S/N  | alpha se | var.r | med.r |
|---------|-----------|-----------|---------|-----------|------|----------|-------|-------|
| ## Q37  | 0.41      | 0.42      | 0.264   | 0.264     | 0.72 | 0.047    | NA    | 0.264 |
| ## Q114 | 0.52      | 0.53      | 0.361   | 0.361     | 1.13 | 0.038    | NA    | 0.361 |
| ## Q65  | 0.11      | 0.11      | 0.056   | 0.056     | 0.12 | 0.073    | NA    | 0.056 |

## Scree Plot

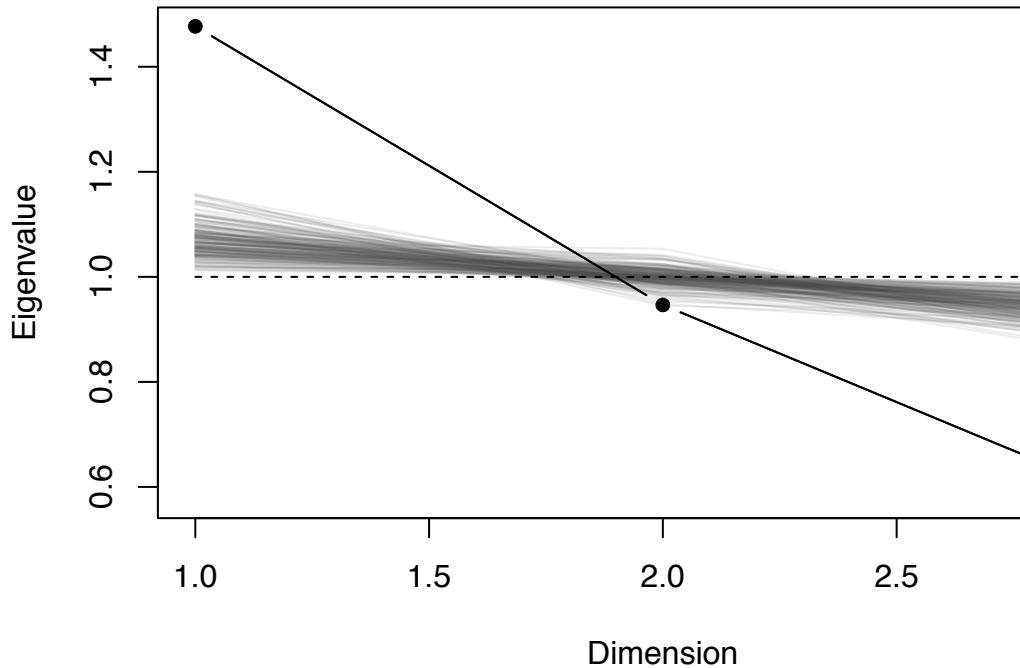

### Unidimensionality: Irritability

```
## [1] "Ratio of first to second eigenvalues: 1.56"
## [1] 1.4769570 0.9464731 0.5765699
## Factor Analysis using method = minres
## Call: fa(r = grm_obj$X)
## Standardized loadings (pattern matrix) based upon correlation matrix
##      MR1    h2    u2 com
## Q37 0.35 0.124 0.8763 1
## Q114 0.26 0.065 0.9346 1
## Q65 1.00 1.001 -0.0011 1
##
##              MR1
## SS loadings  1.19
## Proportion Var 0.40
##
## Mean item complexity = 1
## Test of the hypothesis that 1 factor is sufficient.
##
## The degrees of freedom for the null model are 3 and the objective function was 0.22 with Chi Squa
## The degrees of freedom for the model are 0 and the objective function was 0
##
## The root mean square of the residuals (RMSR) is 0.02
## The df corrected root mean square of the residuals is NA
##
## The harmonic number of observations is 561 with the empirical chi square 1.5 with prob < NA
## The total number of observations was 596 with Likelihood Chi Square = 1.37 with prob < NA
##
## Tucker Lewis Index of factoring reliability = -Inf
## Fit based upon off diagonal values = 0.99
```

### Graded-Response Model: Irritability

| ##      | Extrmt1 | Extrmt2 | Extrmt3 | Extrmt4 | Extrmt5 | Extrmt6 | Dscrmm |
|---------|---------|---------|---------|---------|---------|---------|--------|
| ## Q37  | -2.095  | -0.800  | -0.173  | 0.657   | 1.547   | 2.430   | 0.938  |
| ## Q114 | -0.526  | 0.705   | 1.549   | 2.589   | 3.628   | 4.320   | 0.700  |
| ## Q65  | -0.217  | 0.560   | 0.992   | 1.426   | 1.853   | 2.076   | 3.688  |

### Test Information Function

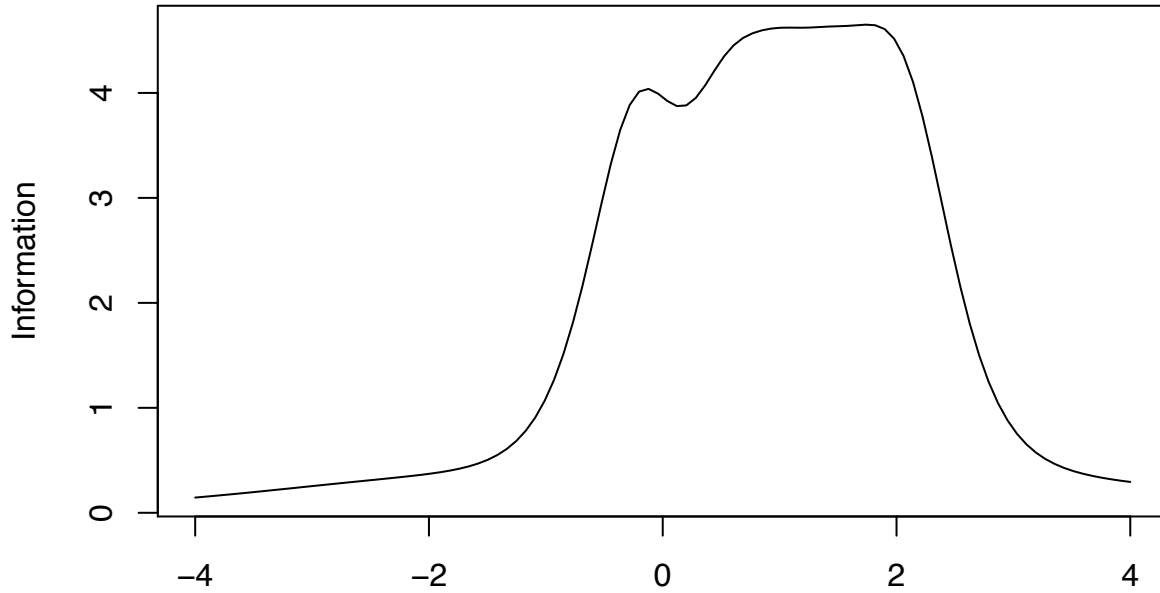

### Item Information Curves

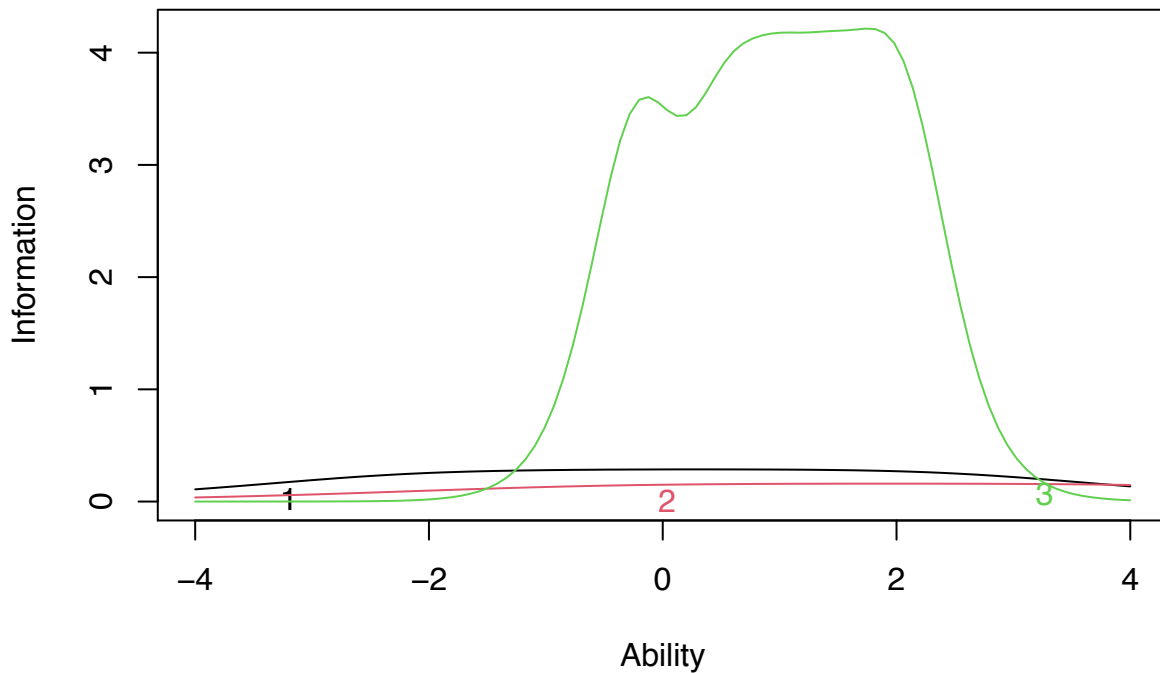

Back to top

### Gender-based DIF: Irritability

## No Gender-based DIF detected

### Age-based DIF: Irritability

## No age-based DIF detected

Back to top

## Self-Criticism

### Site 1

#### Reliability: Self-Criticism

## Cronbach's alpha is 0.887.

## Mean item-total correlation is 0.492.

## If each item were dropped:

| ##      | raw_alpha | std.alpha | G6(smc) | average_r | S/N | alpha se | var.r  | med.r |
|---------|-----------|-----------|---------|-----------|-----|----------|--------|-------|
| ## Q67  | 0.88      | 0.88      | 0.88    | 0.52      | 7.5 | 0.0072   | 0.0082 | 0.50  |
| ## Q38  | 0.88      | 0.88      | 0.87    | 0.50      | 7.0 | 0.0074   | 0.0101 | 0.49  |
| ## Q126 | 0.86      | 0.86      | 0.86    | 0.47      | 6.3 | 0.0082   | 0.0087 | 0.49  |
| ## Q124 | 0.88      | 0.88      | 0.87    | 0.51      | 7.4 | 0.0071   | 0.0092 | 0.50  |
| ## Q129 | 0.88      | 0.88      | 0.87    | 0.50      | 7.1 | 0.0073   | 0.0115 | 0.50  |
| ## Q127 | 0.87      | 0.87      | 0.86    | 0.49      | 6.7 | 0.0078   | 0.0103 | 0.49  |
| ## Q128 | 0.86      | 0.86      | 0.85    | 0.47      | 6.1 | 0.0084   | 0.0074 | 0.47  |
| ## Q101 | 0.86      | 0.86      | 0.85    | 0.47      | 6.3 | 0.0083   | 0.0084 | 0.48  |

## Scree Plot

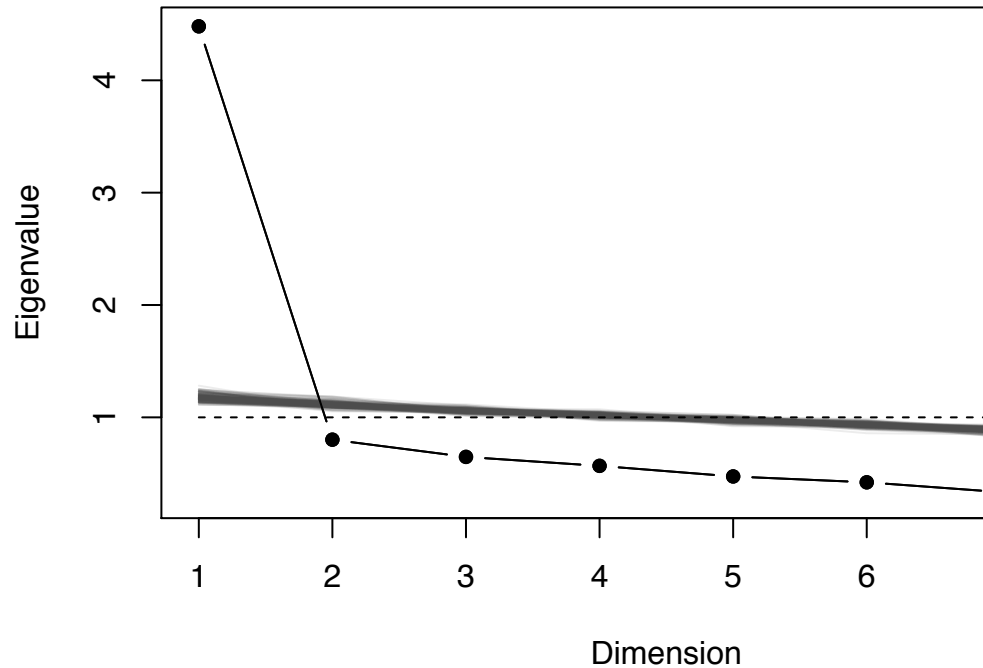

Unidimensionality: Self-Criticism

## [1] "Ratio of first to second eigenvalues: 5.592"

## [1] 4.4803988 0.8012562 0.6479159 0.5681547 0.4740296 0.4219289 0.3351470

## [8] 0.2711690

## Factor Analysis using method = minres

## Call: fa(r = grm\_obj\$X)

## Standardized loadings (pattern matrix) based upon correlation matrix

##       MR1   h2   u2 com

## Q67  0.58 0.34 0.66  1

## Q38  0.66 0.44 0.56  1

## Q126 0.79 0.63 0.37  1

## Q124 0.59 0.34 0.66  1

## Q129 0.64 0.41 0.59  1

## Q127 0.72 0.52 0.48  1

## Q128 0.83 0.69 0.31  1

## Q101 0.80 0.64 0.36  1

##

##                   MR1

## SS loadings       4.01

## Proportion Var 0.50

##

## Mean item complexity = 1

## Test of the hypothesis that 1 factor is sufficient.

##

## The degrees of freedom for the null model are 28 and the objective function was 3.73 with Chi Squ

## The degrees of freedom for the model are 20 and the objective function was 0.19

##

## The root mean square of the residuals (RMSR) is 0.04

## The df corrected root mean square of the residuals is 0.05

##

```

## The harmonic number of observations is 580 with the empirical chi square 59.83 with prob < 7.6e-1
## The total number of observations was 617 with Likelihood Chi Square = 117.19 with prob < 9.4e-1
##
## Tucker Lewis Index of factoring reliability = 0.94
## RMSEA index = 0.089 and the 90 % confidence intervals are 0.074 0.105
## BIC = -11.31
## Fit based upon off diagonal values = 0.99
## Measures of factor score adequacy
##
## Correlation of (regression) scores with factors MR1 0.95
## Multiple R square of scores with factors 0.90
## Minimum correlation of possible factor scores 0.80

```

**Graded-Response Model: Self-Criticism**

| ##      | Extrmt1 | Extrmt2 | Extrmt3 | Extrmt4 | Extrmt5 | Extrmt6 | Dscrmn |
|---------|---------|---------|---------|---------|---------|---------|--------|
| ## Q67  | -2.121  | -1.359  | -0.541  | 0.256   | 1.027   | 2.086   | 1.413  |
| ## Q38  | -1.681  | -0.879  | -0.319  | 0.102   | 0.669   | 1.206   | 1.760  |
| ## Q126 | -1.205  | -0.715  | -0.220  | 0.210   | 0.662   | 1.205   | 2.636  |
| ## Q124 | -1.960  | -0.659  | -0.016  | 0.656   | 1.270   | 2.055   | 1.316  |
| ## Q129 | -0.528  | 0.131   | 0.476   | 0.887   | 1.421   | 1.944   | 1.694  |
| ## Q127 | -0.566  | -0.170  | 0.190   | 0.597   | 1.061   | 1.513   | 2.090  |
| ## Q128 | -1.056  | -0.544  | -0.209  | 0.188   | 0.666   | 1.185   | 2.947  |
| ## Q101 | -0.635  | -0.171  | 0.221   | 0.583   | 0.974   | 1.489   | 2.857  |

**Test Information Function**

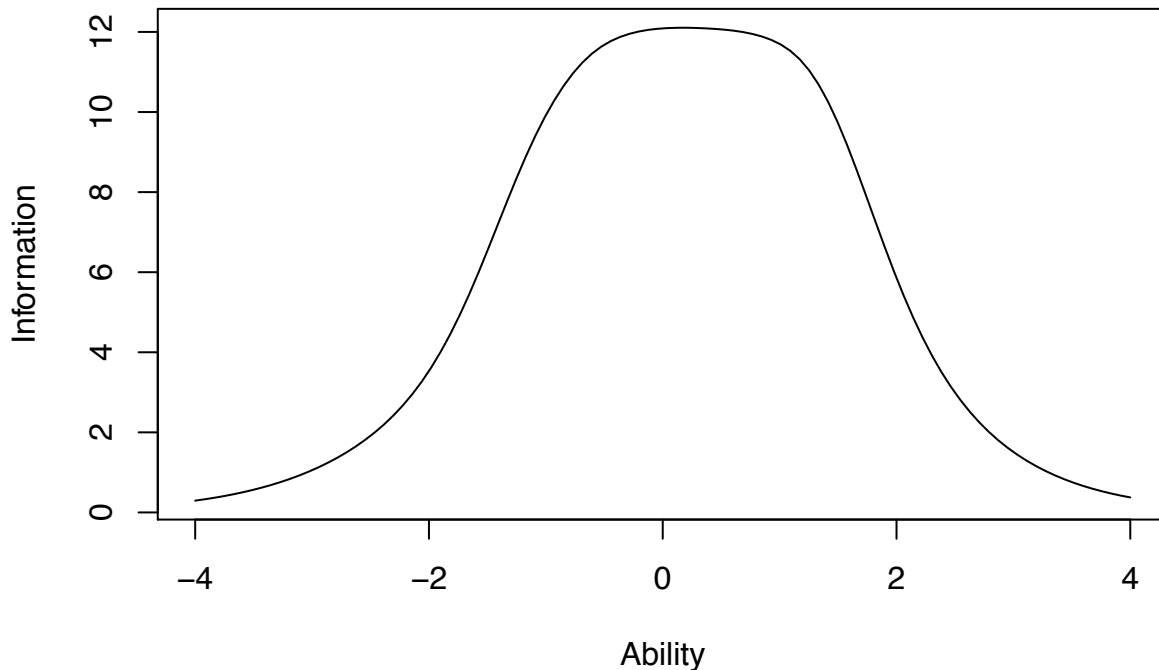



## Item Information Curves

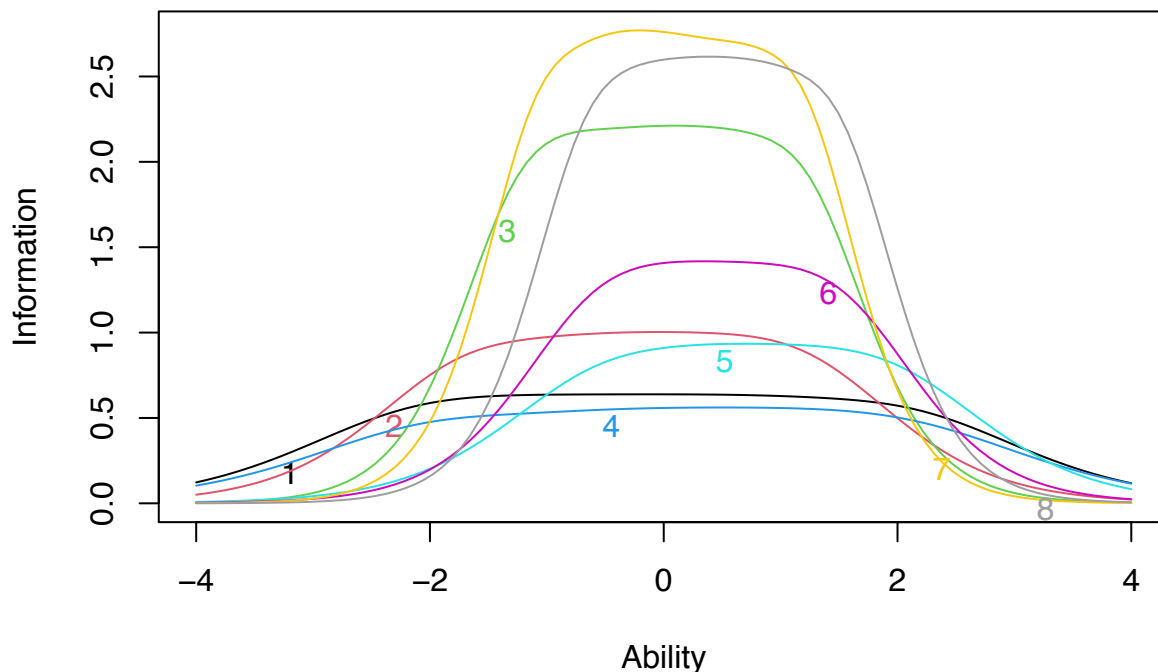

Back to top

### Site 2

#### Reliability: Self-Criticism

## Cronbach's alpha is 0.901.

## Mean item-total correlation is 0.529.

## If each item were dropped:

| ##      | raw_alpha | std.alpha | G6(smc) | average_r | S/N | alpha se | var.r  | med.r |
|---------|-----------|-----------|---------|-----------|-----|----------|--------|-------|
| ## Q67  | 0.90      | 0.90      | 0.90    | 0.56      | 8.8 | 0.0063   | 0.0074 | 0.57  |
| ## Q38  | 0.89      | 0.89      | 0.88    | 0.53      | 8.0 | 0.0067   | 0.0100 | 0.52  |
| ## Q126 | 0.88      | 0.88      | 0.87    | 0.51      | 7.2 | 0.0075   | 0.0072 | 0.50  |
| ## Q124 | 0.89      | 0.89      | 0.89    | 0.55      | 8.5 | 0.0065   | 0.0087 | 0.56  |
| ## Q129 | 0.89      | 0.89      | 0.88    | 0.53      | 7.9 | 0.0069   | 0.0105 | 0.52  |
| ## Q127 | 0.89      | 0.89      | 0.88    | 0.54      | 8.1 | 0.0067   | 0.0088 | 0.52  |
| ## Q128 | 0.88      | 0.88      | 0.87    | 0.51      | 7.2 | 0.0075   | 0.0072 | 0.50  |
| ## Q101 | 0.88      | 0.88      | 0.88    | 0.51      | 7.4 | 0.0073   | 0.0089 | 0.52  |

## Scree Plot

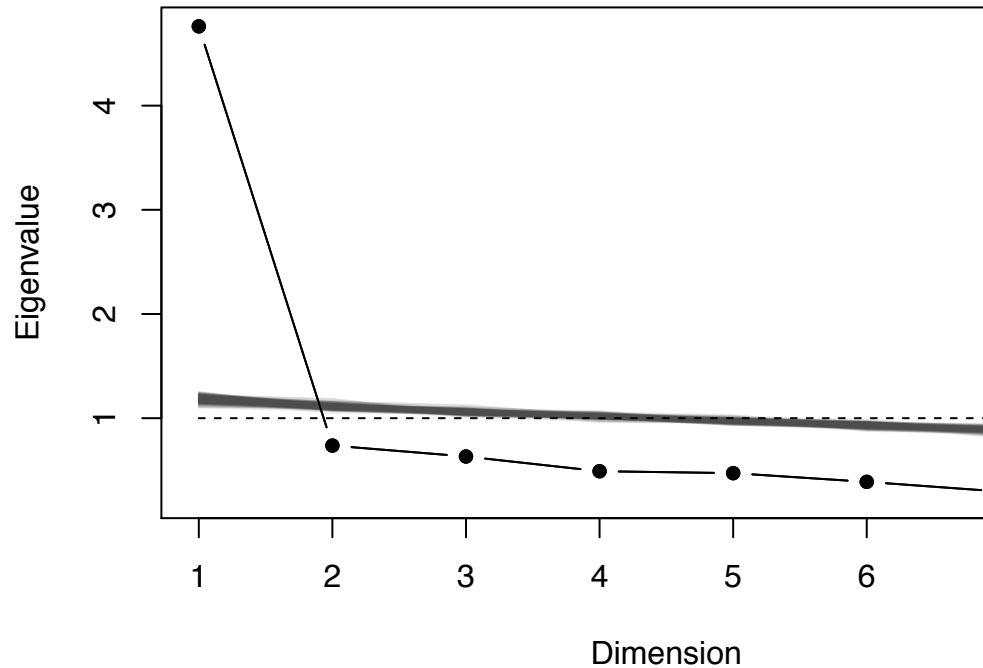

Unidimensionality: Self-Criticism

## [1] "Ratio of first to second eigenvalues: 6.461"

## [1] 4.7610683 0.7368737 0.6321382 0.4909212 0.4723034 0.3888566 0.2959108

## [8] 0.2219279

## Factor Analysis using method = minres

## Call: fa(r = grm\_obj\$X)

## Standardized loadings (pattern matrix) based upon correlation matrix

##       MR1   h2   u2 com

## Q67  0.60 0.36 0.64  1

## Q38  0.70 0.49 0.51  1

## Q126 0.84 0.70 0.30  1

## Q124 0.64 0.41 0.59  1

## Q129 0.72 0.52 0.48  1

## Q127 0.70 0.49 0.51  1

## Q128 0.84 0.70 0.30  1

## Q101 0.81 0.65 0.35  1

##

##                   MR1

## SS loadings       4.33

## Proportion Var 0.54

##

## Mean item complexity = 1

## Test of the hypothesis that 1 factor is sufficient.

##

## The degrees of freedom for the null model are 28 and the objective function was 4.33 with Chi Squ

## The degrees of freedom for the model are 20 and the objective function was 0.26

##

## The root mean square of the residuals (RMSR) is 0.04

## The df corrected root mean square of the residuals is 0.05

##

```

## The harmonic number of observations is 561 with the empirical chi square 60.11 with prob < 6.8e-
## The total number of observations was 596 with Likelihood Chi Square = 156.05 with prob < 4.3e-2
##
## Tucker Lewis Index of factoring reliability = 0.925
## RMSEA index = 0.107 and the 90 % confidence intervals are 0.092 0.123
## BIC = 28.24
## Fit based upon off diagonal values = 0.99
## Measures of factor score adequacy
##
## Correlation of (regression) scores with factors MR1 0.96
## Multiple R square of scores with factors 0.91
## Minimum correlation of possible factor scores 0.83

```

**Graded-Response Model: Self-Criticism**

| ##      | Extrmt1 | Extrmt2 | Extrmt3 | Extrmt4 | Extrmt5 | Extrmt6 | Dscrmn |
|---------|---------|---------|---------|---------|---------|---------|--------|
| ## Q67  | -1.752  | -0.985  | -0.248  | 0.522   | 1.290   | 2.241   | 1.537  |
| ## Q38  | -0.937  | -0.215  | 0.190   | 0.623   | 1.069   | 1.627   | 1.943  |
| ## Q126 | -0.660  | -0.185  | 0.235   | 0.635   | 1.076   | 1.514   | 3.248  |
| ## Q124 | -1.026  | -0.066  | 0.531   | 1.125   | 1.659   | 2.276   | 1.696  |
| ## Q129 | 0.016   | 0.543   | 0.867   | 1.218   | 1.622   | 1.996   | 2.355  |
| ## Q127 | -0.056  | 0.420   | 0.700   | 1.019   | 1.389   | 1.869   | 2.219  |
| ## Q128 | -0.583  | -0.074  | 0.298   | 0.714   | 1.058   | 1.499   | 3.337  |
| ## Q101 | -0.156  | 0.232   | 0.602   | 1.001   | 1.432   | 1.870   | 2.994  |

**Test Information Function**

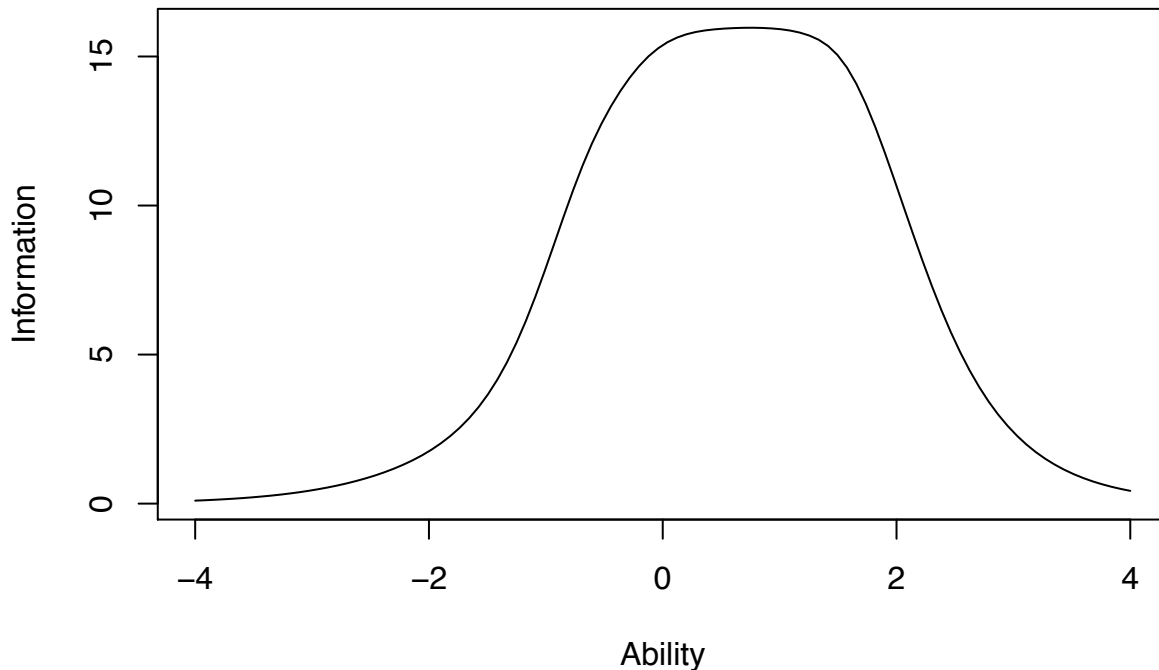

## Item Information Curves

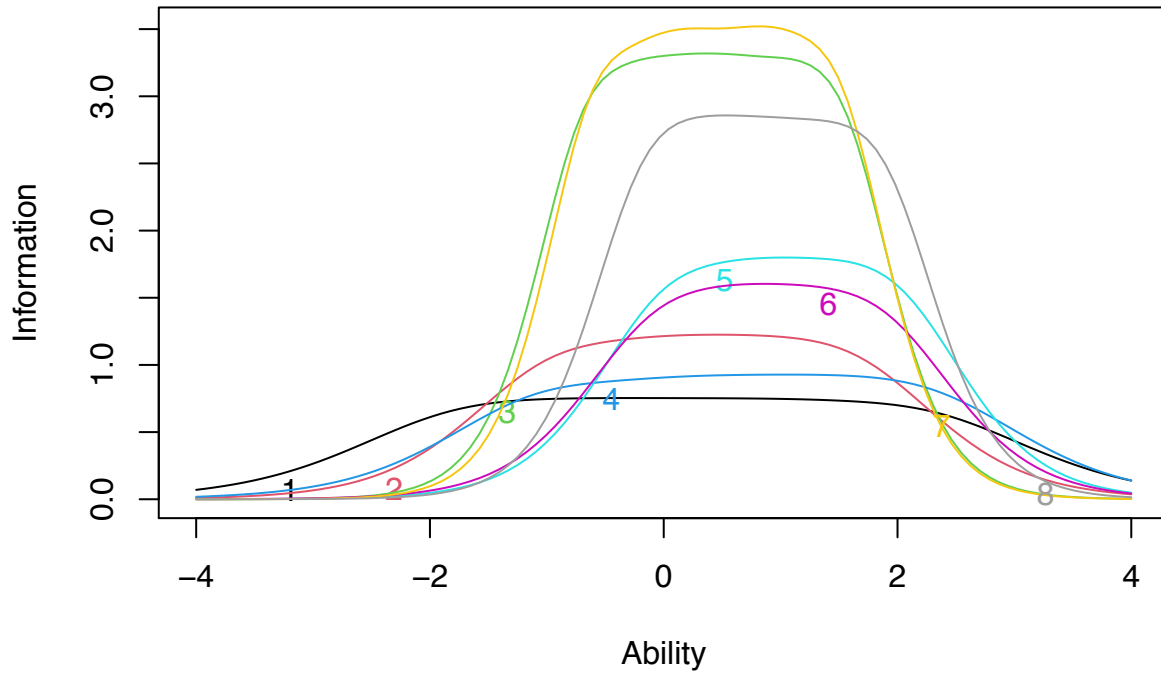

Back to top

### Site DIF

```
## Call:
## lordif::lordif(resp.data = as.data.frame(merged_data), group = site)
##
## Number of DIF groups: 2
##
## Number of items flagged for DIF: 1 of 8
##
## Items flagged: 1
##
## Number of iterations for purification: 2 of 10
##
## Detection criterion: Chisqr
##
## Threshold: alpha = 0.01
##
## item ncat chi12 chi13 chi23
## 1 1 7 0.0004 0.0018 0.7988
## 2 2 7 0.2185 0.2951 0.3357
## 3 3 7 0.6728 0.6772 0.4381
## 4 4 7 0.1250 0.1393 0.2076
## 5 5 7 0.8057 0.6126 0.3376
## 6 6 7 0.7231 0.9270 0.8717
## 7 7 7 0.4443 0.6562 0.6118
## 8 8 7 0.4284 0.3017 0.1835
```

## Trait Distributions

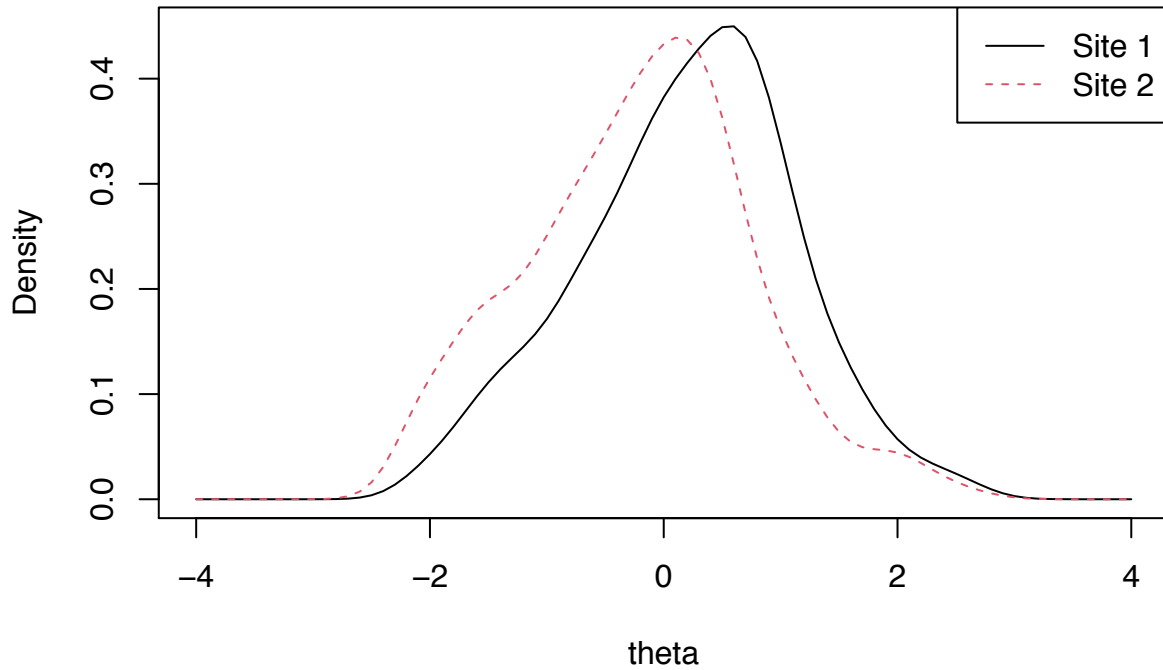

### Item True Score Functions – Item 1

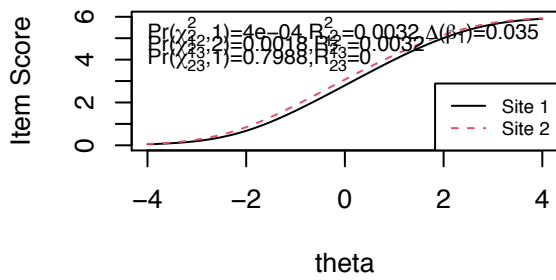

### Differences in Item True Score Function

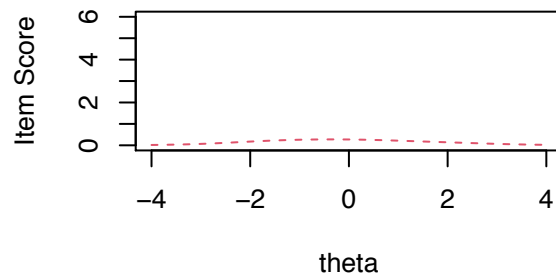

### Item Response Functions

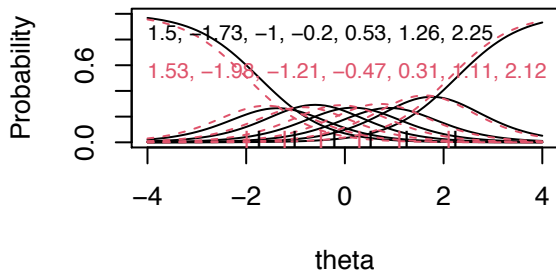

### Impact (Weighted by Density)

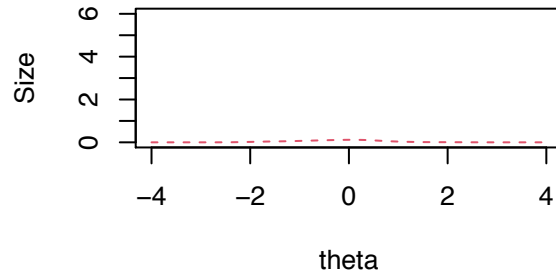

**All Items**

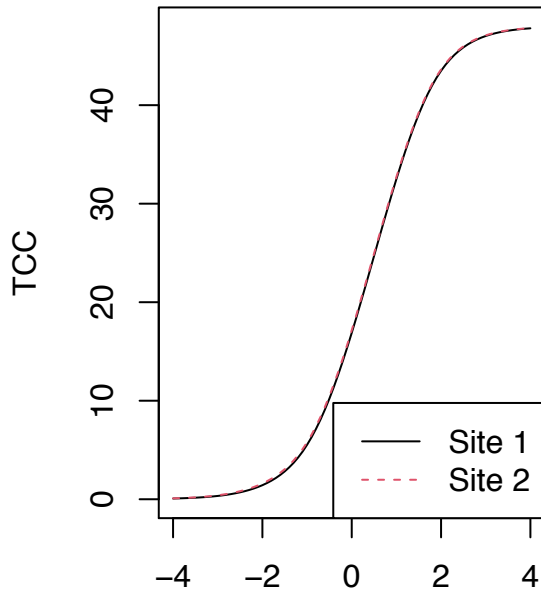

**DIF Items**

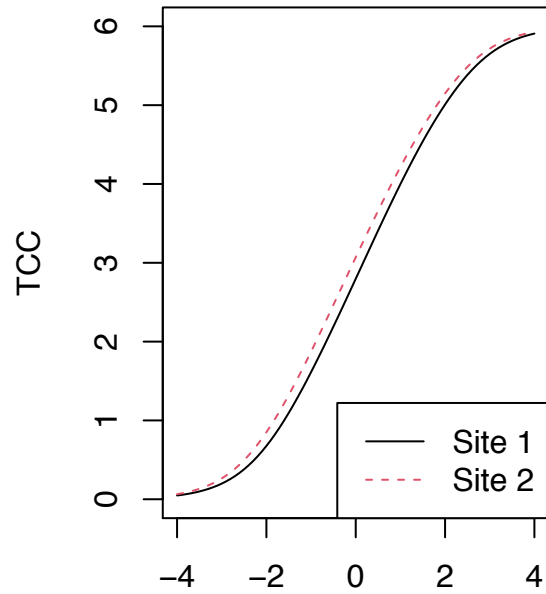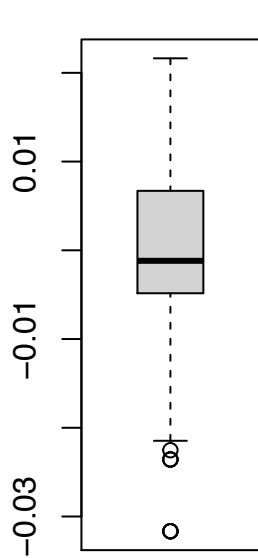

theta

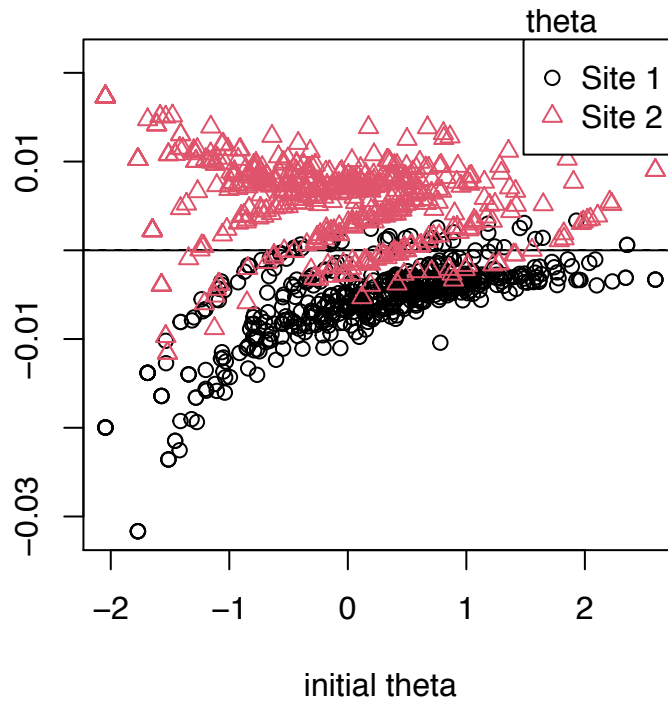

theta

[Back to top](#)

### Gender-based DIF: Self-Criticism

```
## Call:  
## lordif::lordif(resp.data = as.data.frame(sex.data), group = sex)  
##  
## Number of DIF groups: 2
```

```

##
## Number of items flagged for DIF: 0 of 8
##
## Items flagged:
##
## Number of iterations for purification: 1 of 10
##
## Detection criterion: Chisqr
##
## Threshold: alpha = 0.01

```

### Age-based DIF: Self-Criticism

```

## Call:
## lordif::lordif(resp.data = as.data.frame(age.data), group = age)
##
## Number of DIF groups: 2
##
## Number of items flagged for DIF: 3 of 8
##
## Items flagged: 2, 4, 8
##
## Number of iterations for purification: 3 of 10
##
## Detection criterion: Chisqr
##
## Threshold: alpha = 0.01
##
## item ncat chi12 chi13 chi23
## 1 1 7 0.9889 0.2715 0.1064
## 2 2 7 0.0021 0.0020 0.0867
## 3 3 7 0.2060 0.4493 0.9805
## 4 4 7 0.3001 0.0013 0.0005
## 5 5 7 0.0638 0.1449 0.5139
## 6 6 7 0.1421 0.2190 0.3474
## 7 7 7 0.0197 0.0625 0.7424
## 8 8 7 0.0009 0.0036 0.6409

```

## Trait Distributions

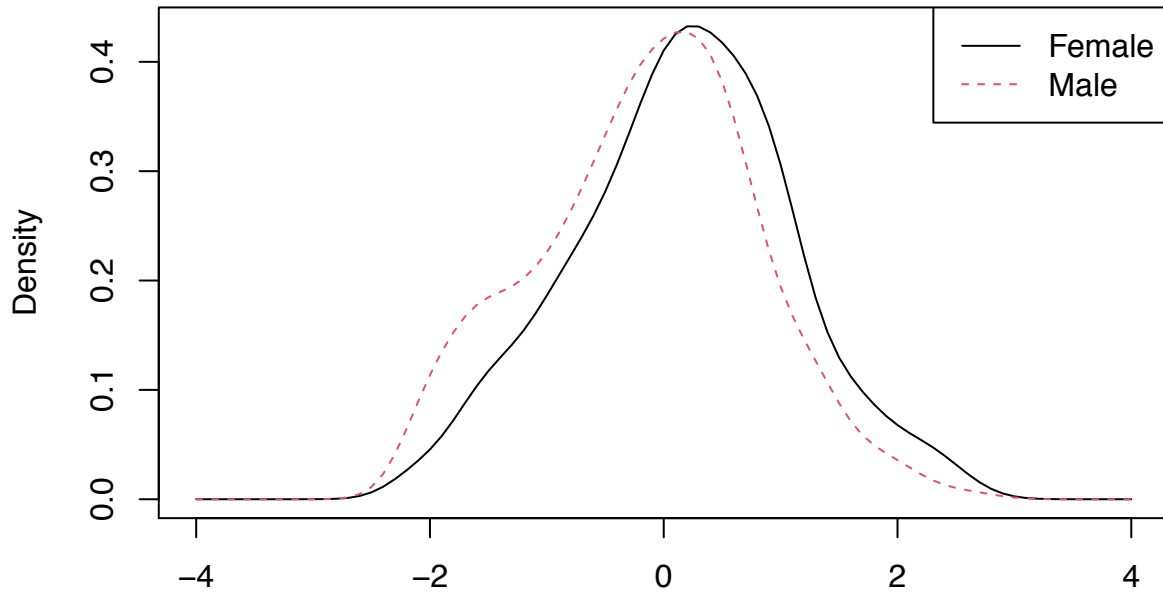

### Item True Score Functions – Item 2 Differences in Item True Score Function

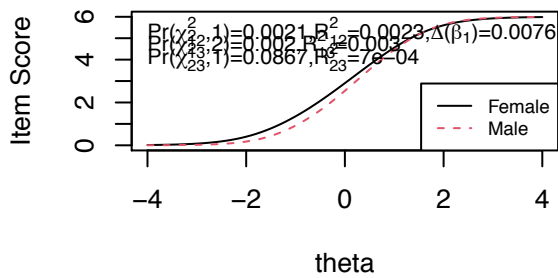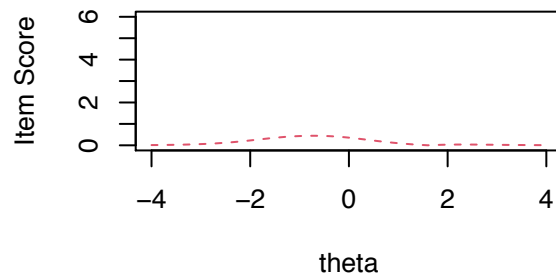

### Item Response Functions

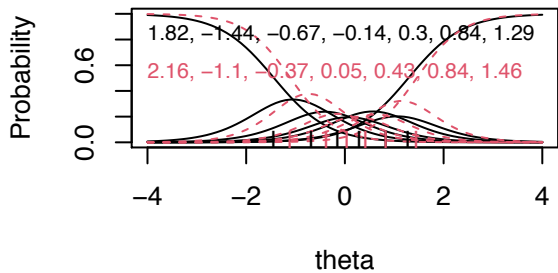

### Impact (Weighted by Density)

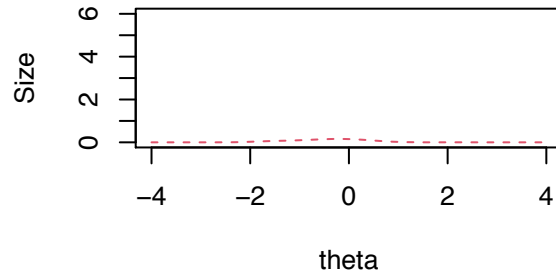



### Item True Score Functions – Item 4

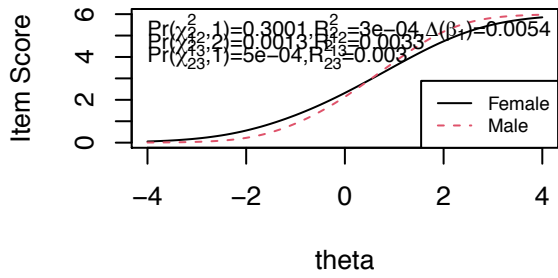

### Differences in Item True Score Function

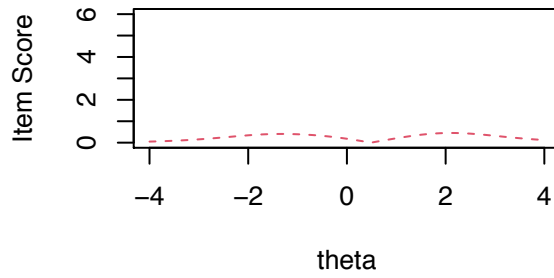

### Item Response Functions

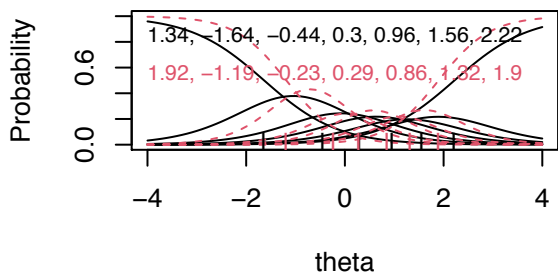

### Impact (Weighted by Density)

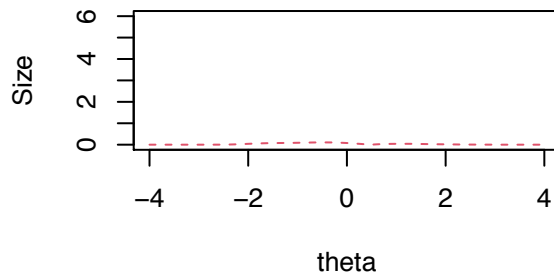

### Item True Score Functions – Item 8

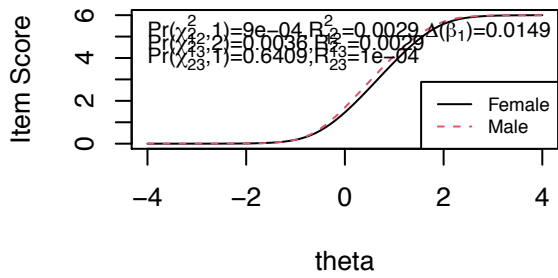

### Differences in Item True Score Function

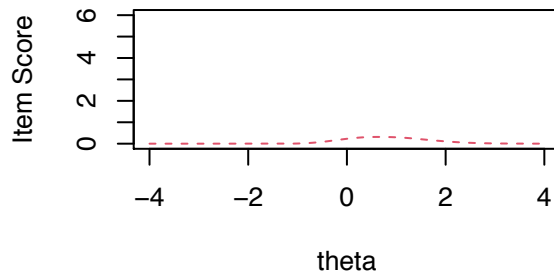

### Item Response Functions

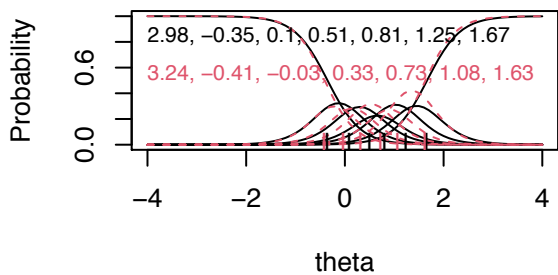

### Impact (Weighted by Density)

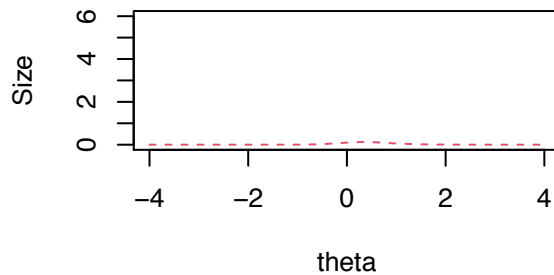

**All Items**

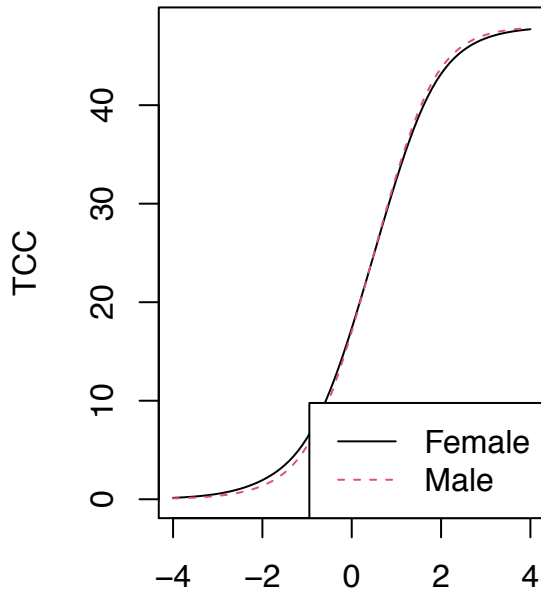

**DIF Items**

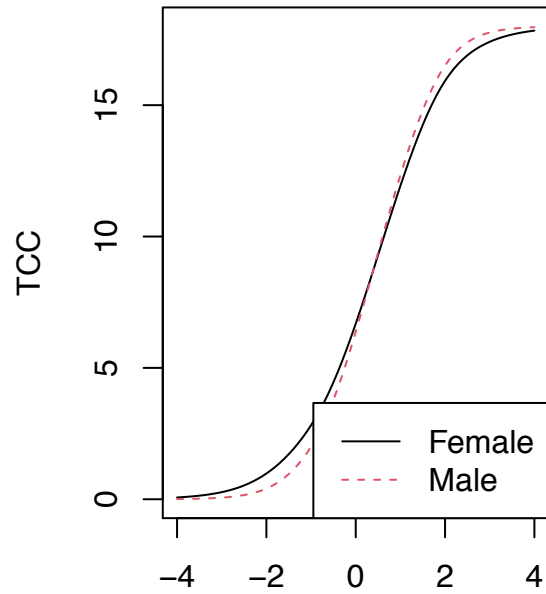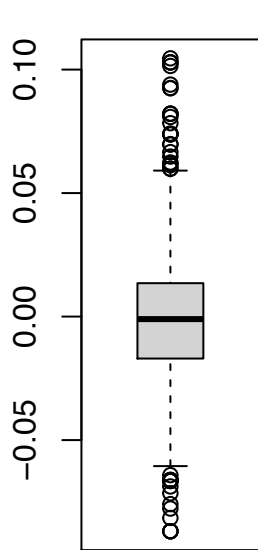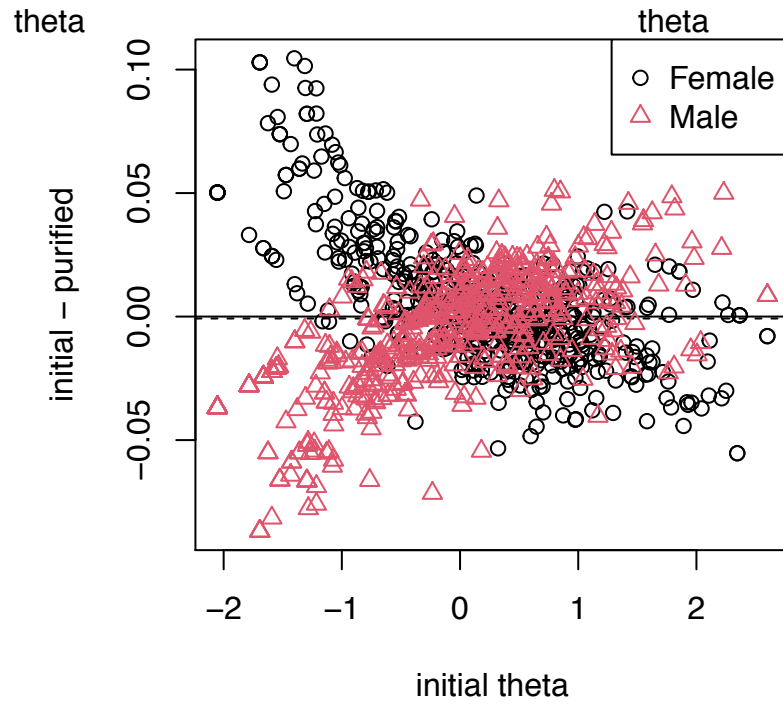

[Back to top](#)

## Situational Avoidance

Site 1

Reliability: Situational Avoidance

```

## Cronbach's alpha is 0.645.
## Mean item-total correlation is 0.377.
## If each item were dropped:
##      raw_alpha std.alpha G6(smc) average_r S/N alpha se var.r med.r
## Q119    0.50    0.50    0.34    0.34 1.01  0.040  NA  0.34
## Q17     0.68    0.68    0.52    0.52 2.16  0.026  NA  0.52
## Q118    0.43    0.43    0.28    0.28 0.77  0.045  NA  0.28

```

### Scree Plot

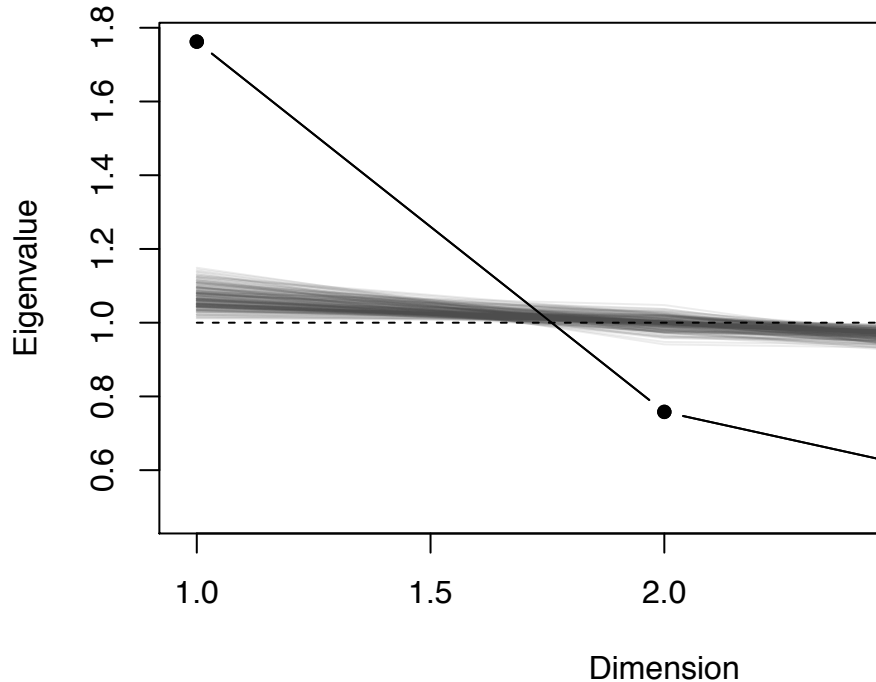

### Unidimensionality: Situational Avoidance

```

## [1] "Ratio of first to second eigenvalues: 2.325"
## [1] 1.7623073 0.7580802 0.4796126
## Factor Analysis using method = minres
## Call: fa(r = grm_obj$X)
## Standardized loadings (pattern matrix) based upon correlation matrix
##      MR1  h2  u2 com
## Q119 0.65 0.43 0.57  1
## Q17  0.42 0.18 0.82  1
## Q118 0.79 0.62 0.38  1
##
##              MR1
## SS loadings  1.23
## Proportion Var 0.41
##
## Mean item complexity = 1
## Test of the hypothesis that 1 factor is sufficient.
##
## The degrees of freedom for the null model are 3 and the objective function was 0.45 with Chi Squar
## The degrees of freedom for the model are 0 and the objective function was 0
##

```

```

## The root mean square of the residuals (RMSR) is 0
## The df corrected root mean square of the residuals is NA
##
## The harmonic number of observations is 585 with the empirical chi square 0 with prob < NA
## The total number of observations was 617 with Likelihood Chi Square = 0 with prob < NA
##
## Tucker Lewis Index of factoring reliability = -Inf
## Fit based upon off diagonal values = 1
## Measures of factor score adequacy
##
##                                     MR1
## Correlation of (regression) scores with factors 0.85
## Multiple R square of scores with factors 0.72
## Minimum correlation of possible factor scores 0.45

```

**Graded-Response Model: Situational Avoidance**

|         | Extrmt1 | Extrmt2 | Extrmt3 | Extrmt4 | Extrmt5 | Extrmt6 | Dscrmn |
|---------|---------|---------|---------|---------|---------|---------|--------|
| ## Q119 | 1.017   | 0.258   | -0.119  | -0.597  | -1.036  | -1.438  | -1.615 |
| ## Q17  | 0.071   | -0.774  | -1.079  | -1.540  | -1.944  | -2.785  | -0.986 |
| ## Q118 | 0.807   | 0.224   | -0.201  | -0.566  | -0.950  | -1.379  | -2.816 |

**Test Information Function**

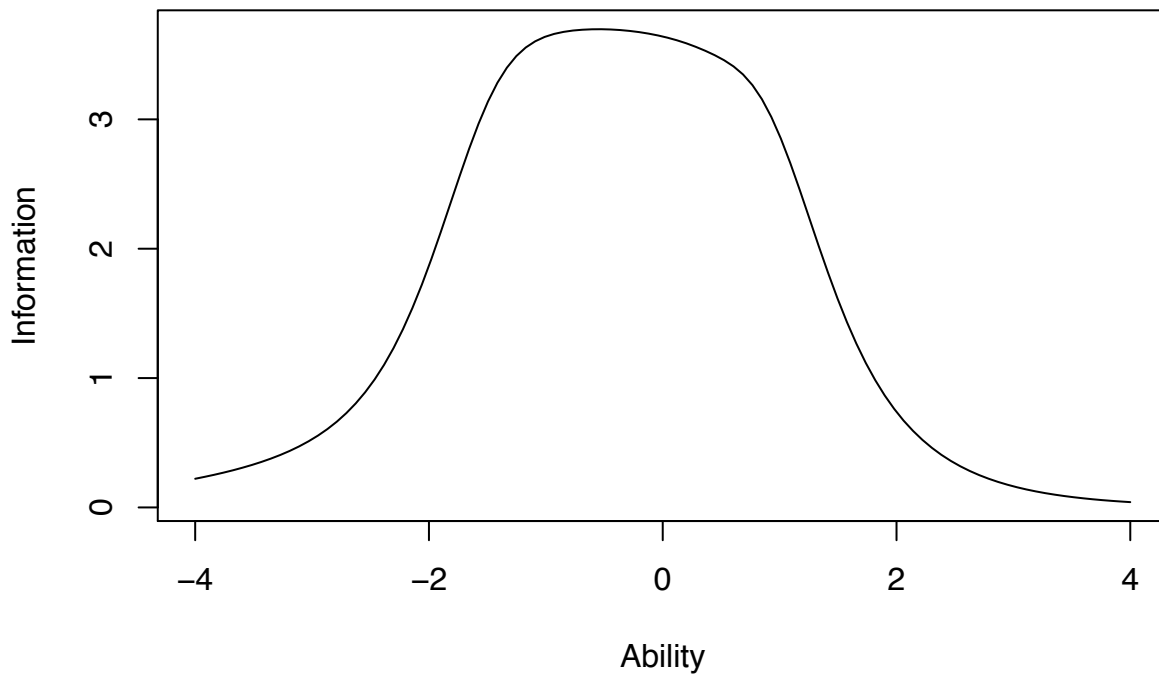

## Item Information Curves

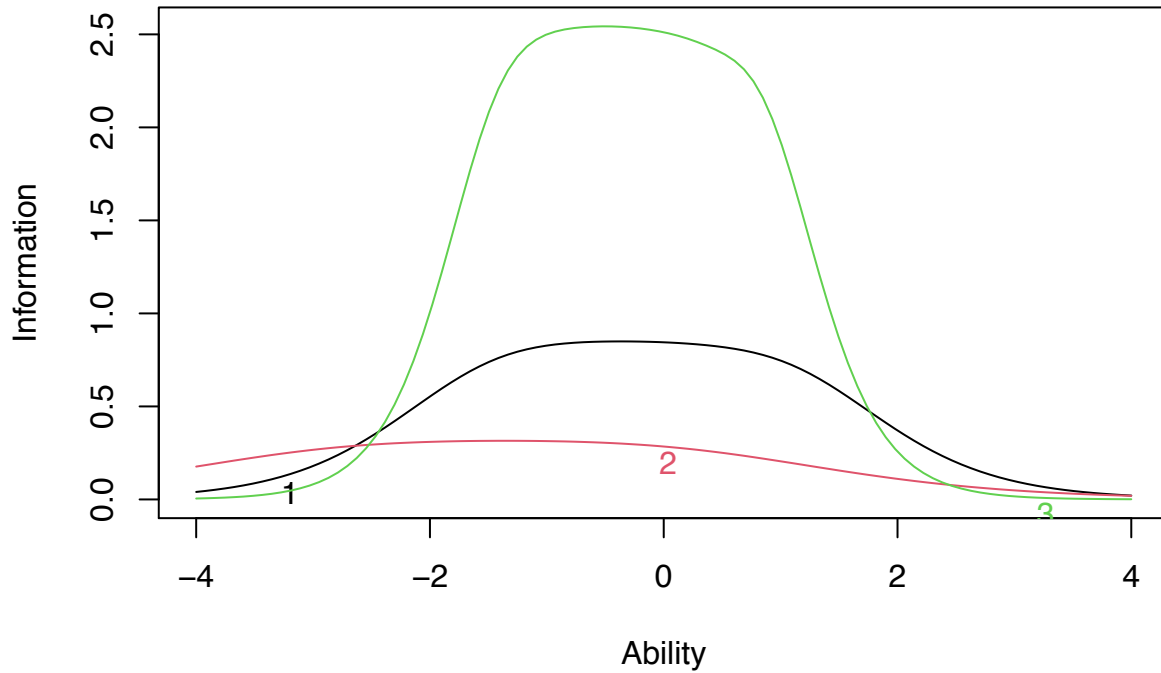

Back to top

### Site 2

#### Reliability: Situational Avoidance

## Cronbach's alpha is 0.632.

## Mean item-total correlation is 0.365.

## If each item were dropped:

| ##      | raw_alpha | std.alpha | G6(smc) | average_r | S/N  | alpha se | var.r | med.r |
|---------|-----------|-----------|---------|-----------|------|----------|-------|-------|
| ## Q119 | 0.44      | 0.44      | 0.29    | 0.29      | 0.80 | 0.046    | NA    | 0.29  |
| ## Q17  | 0.70      | 0.70      | 0.54    | 0.54      | 2.34 | 0.025    | NA    | 0.54  |
| ## Q118 | 0.43      | 0.43      | 0.27    | 0.27      | 0.74 | 0.047    | NA    | 0.27  |

## Scree Plot

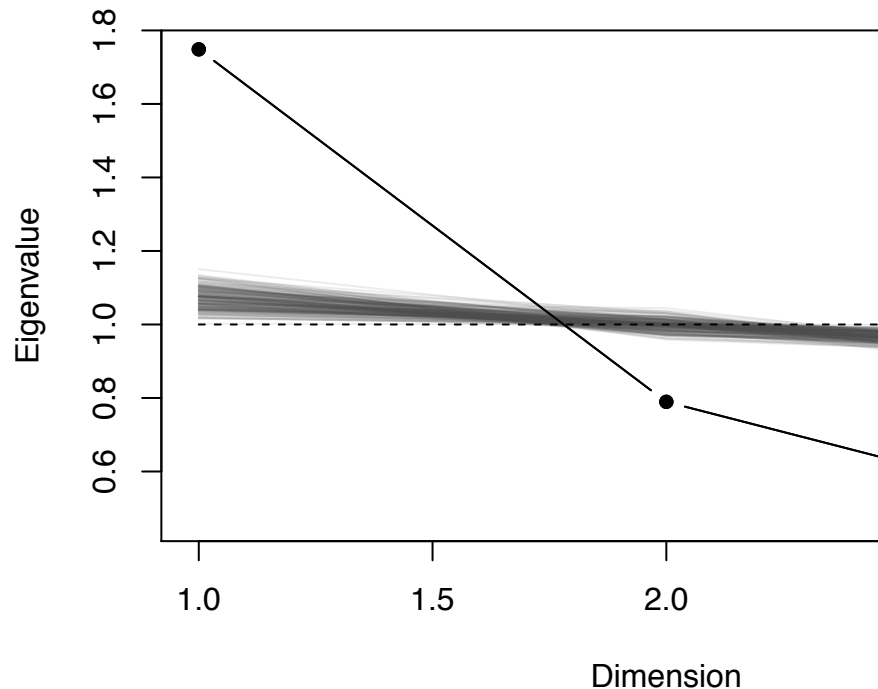

### Unidimensionality: Situational Avoidance

## [1] "Ratio of first to second eigenvalues: 2.215"

## [1] 1.7485400 0.7895052 0.4619548

## Factor Analysis using method = minres

## Call: fa(r = grm\_obj\$X)

## Standardized loadings (pattern matrix) based upon correlation matrix

##       MR1   h2   u2 com

## Q119 0.71 0.51 0.49  1

## Q17  0.38 0.15 0.85  1

## Q118 0.75 0.57 0.43  1

##

##                   MR1

## SS loadings       1.22

## Proportion Var 0.41

##

## Mean item complexity = 1

## Test of the hypothesis that 1 factor is sufficient.

##

## The degrees of freedom for the null model are 3 and the objective function was 0.45 with Chi Square

## The degrees of freedom for the model are 0 and the objective function was 0

##

## The root mean square of the residuals (RMSR) is 0

## The df corrected root mean square of the residuals is NA

##

## The harmonic number of observations is 564 with the empirical chi square 0 with prob < NA

## The total number of observations was 596 with Likelihood Chi Square = 0 with prob < NA

##

## Tucker Lewis Index of factoring reliability = -Inf

## Fit based upon off diagonal values = 1

## Measures of factor score adequacy

```

##
## Correlation of (regression) scores with factors    MR1
## Multiple R square of scores with factors          0.72
## Minimum correlation of possible factor scores     0.43

```

**Graded-Response Model: Situational Avoidance**

```

##      Extrmt1 Extrmt2 Extrmt3 Extrmt4 Extrmt5 Extrmt6 Dscrmn
## Q119  0.472  -0.048  -0.382  -0.765  -1.171  -1.507  -2.178
## Q17   -0.124  -0.938  -1.436  -1.818  -2.334  -3.146  -0.796
## Q118  0.705   0.069  -0.326  -0.741  -1.174  -1.640  -2.276

```

**Test Information Function**

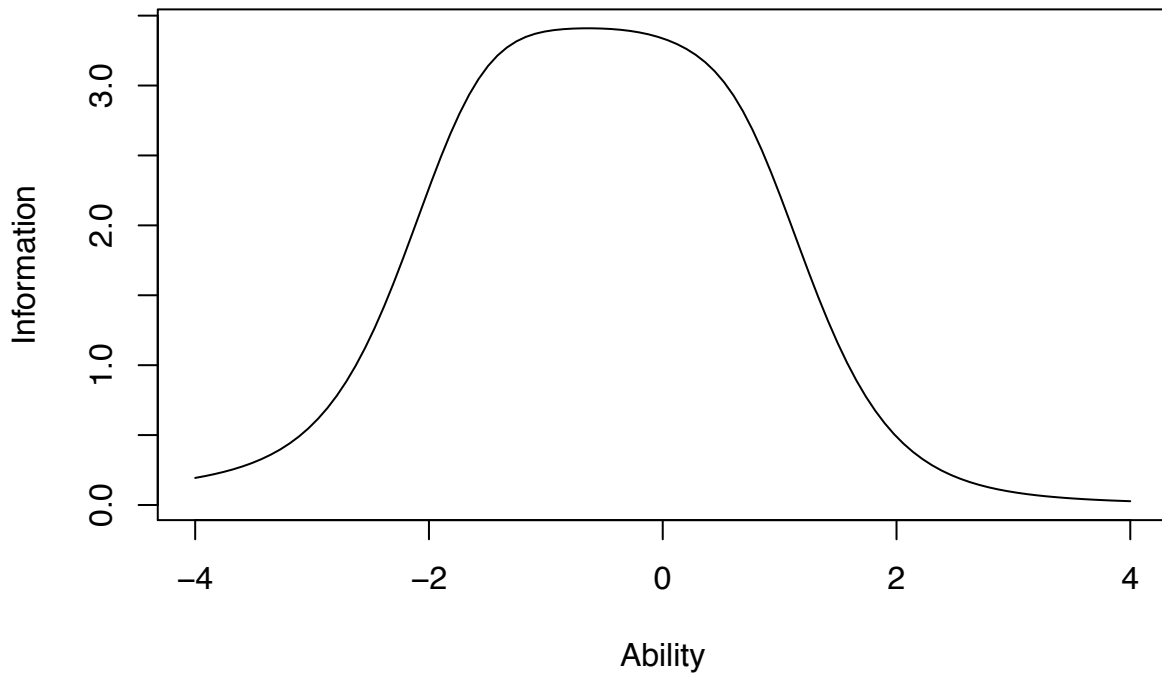

## Item Information Curves

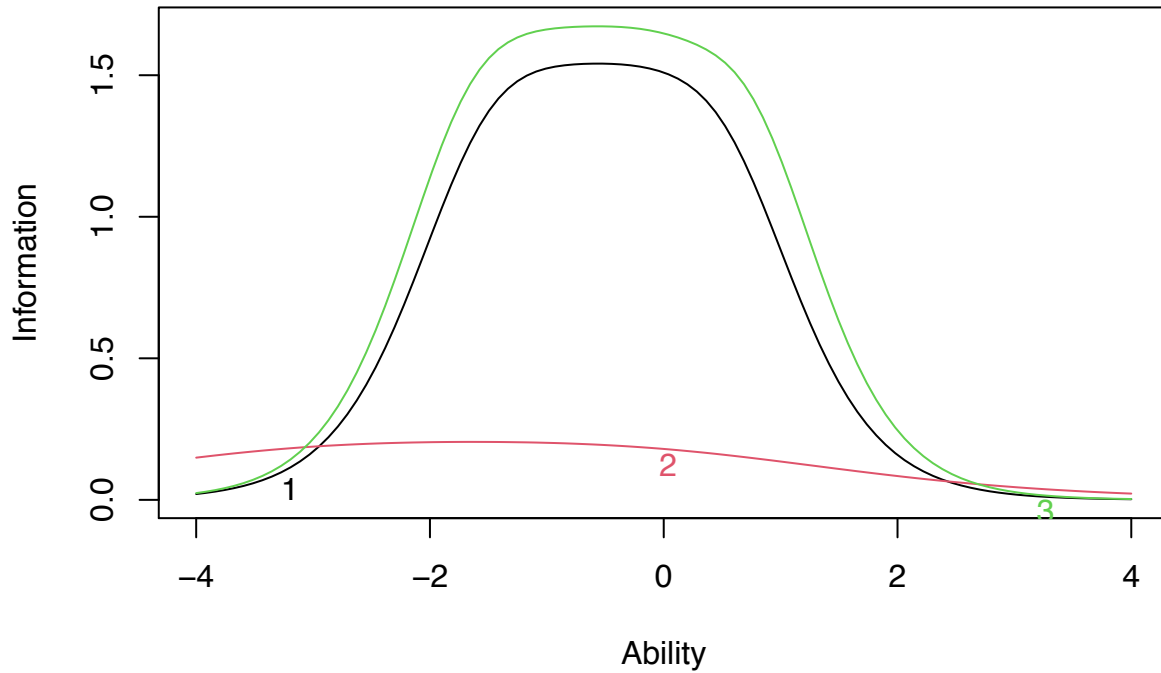

Back to top

### Gender-based DIF: Situational Avoidance

## No Gender-based DIF detected

### Age-based DIF: Situational Avoidance

## No age-based DIF detected

Back to top

## Social Avoidance

### Site 1

#### Reliability: Social Avoidance

## Cronbach's alpha is 0.747.

## Mean item-total correlation is 0.497.

## If each item were dropped:

| ##      | raw_alpha | std.alpha | G6(smc) | average_r | S/N | alpha se | var.r | med.r |
|---------|-----------|-----------|---------|-----------|-----|----------|-------|-------|
| ## Q64  | 0.59      | 0.59      | 0.42    | 0.42      | 1.4 | 0.033    | NA    | 0.42  |
| ## Q120 | 0.67      | 0.67      | 0.50    | 0.50      | 2.0 | 0.027    | NA    | 0.50  |
| ## Q121 | 0.72      | 0.72      | 0.57    | 0.57      | 2.6 | 0.022    | NA    | 0.57  |



## Scree Plot

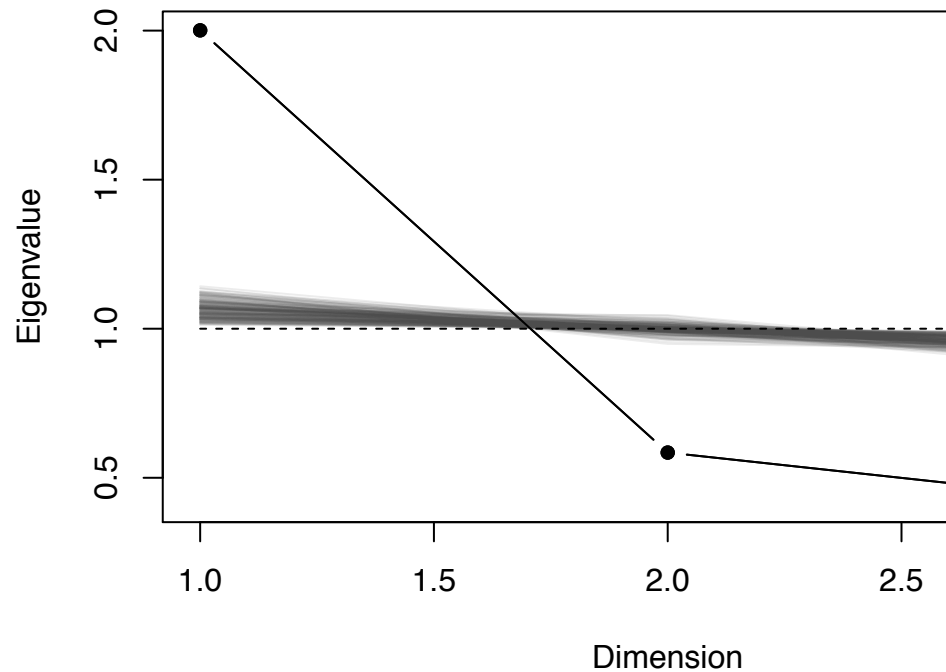

Unidimensionality: Social Avoidance

```
## [1] "Ratio of first to second eigenvalues: 3.423"
```

```
## [1] 2.0008696 0.5845459 0.4145844
```

```
## Factor Analysis using method = minres
```

```
## Call: fa(r = grm_obj$X)
```

```
## Standardized loadings (pattern matrix) based upon correlation matrix
```

```
##      MR1  h2  u2 com
```

```
## Q64  0.83 0.68 0.32  1
```

```
## Q120 0.69 0.47 0.53  1
```

```
## Q121 0.62 0.38 0.62  1
```

```
##
```

```
##              MR1
```

```
## SS loadings  1.53
```

```
## Proportion Var 0.51
```

```
##
```

```
## Mean item complexity = 1
```

```
## Test of the hypothesis that 1 factor is sufficient.
```

```
##
```

```
## The degrees of freedom for the null model are 3 and the objective function was 0.72 with Chi Square
```

```
## The degrees of freedom for the model are 0 and the objective function was 0
```

```
##
```

```
## The root mean square of the residuals (RMSR) is 0
```

```
## The df corrected root mean square of the residuals is NA
```

```
##
```

```
## The harmonic number of observations is 572 with the empirical chi square 0 with prob < NA
```

```
## The total number of observations was 617 with Likelihood Chi Square = 0 with prob < NA
```

```
##
```

```
## Tucker Lewis Index of factoring reliability = -Inf
```

```
## Fit based upon off diagonal values = 1
```

```
## Measures of factor score adequacy
```

```
##                                     MR1
## Correlation of (regression) scores with factors 0.89
## Multiple R square of scores with factors 0.79
## Minimum correlation of possible factor scores 0.57
```

**Graded-Response Model: Social Avoidance**

```
##      Extrmt1 Extrmt2 Extrmt3 Extrmt4 Extrmt5 Extrmt6 Dscrmm
## Q64  -1.159  -0.485  -0.075   0.326   0.783   1.313   3.428
## Q120 -1.456  -0.729  -0.161   0.308   0.810   1.467   1.845
## Q121 -1.274  -0.478   0.056   0.587   1.124   2.045   1.562
```

**Test Information Function**

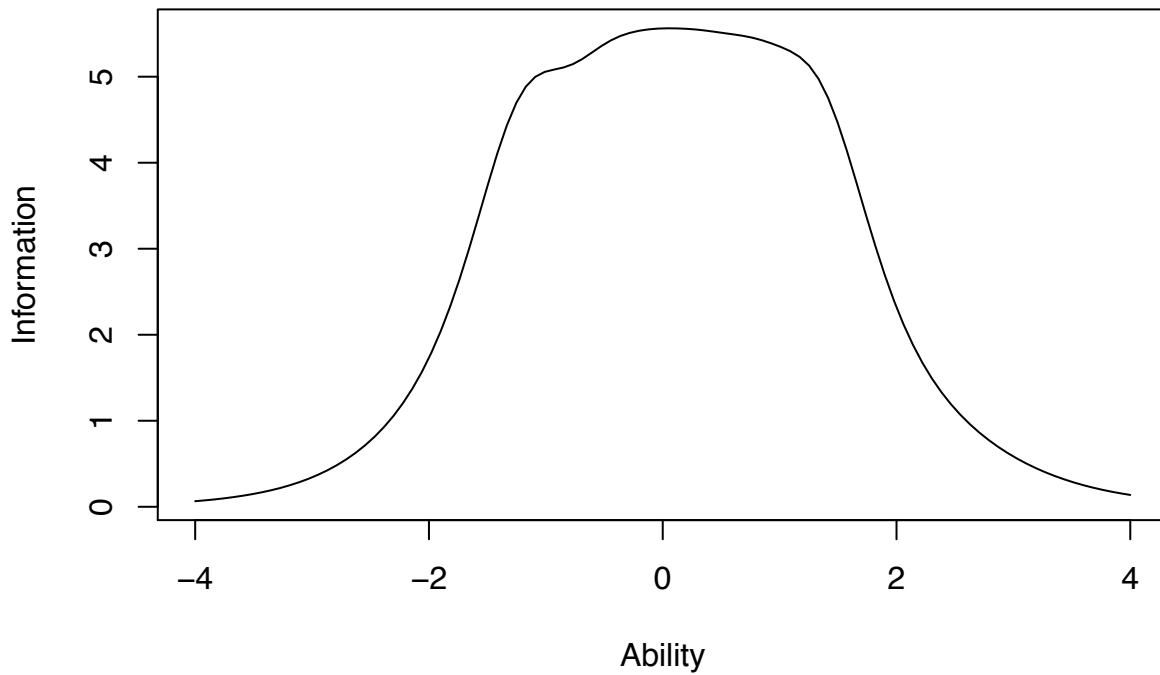

## Item Information Curves

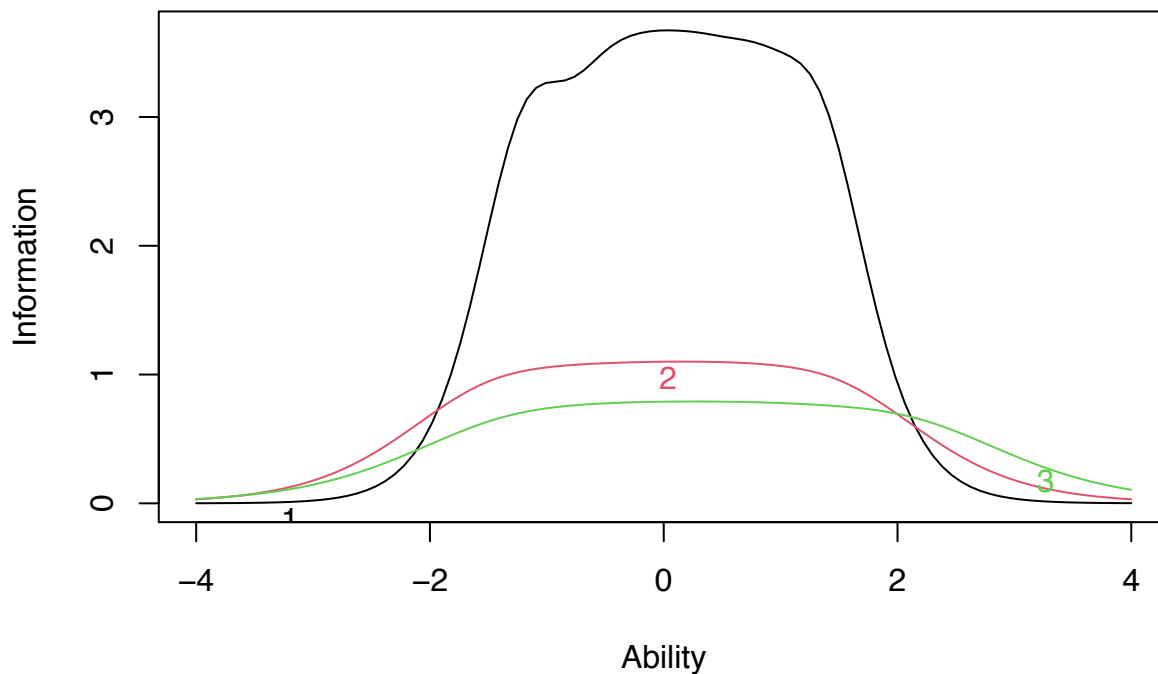

Back to top

### Site 2

#### Reliability: Social Avoidance

## Cronbach's alpha is 0.789.

## Mean item-total correlation is 0.556.

## If each item were dropped:

| ##      | raw_alpha | std.alpha | G6(smc) | average_r | S/N | alpha se | var.r | med.r |
|---------|-----------|-----------|---------|-----------|-----|----------|-------|-------|
| ## Q64  | 0.63      | 0.63      | 0.46    | 0.46      | 1.7 | 0.030    | NA    | 0.46  |
| ## Q120 | 0.73      | 0.73      | 0.57    | 0.57      | 2.7 | 0.022    | NA    | 0.57  |
| ## Q121 | 0.78      | 0.78      | 0.64    | 0.64      | 3.5 | 0.018    | NA    | 0.64  |

## Scree Plot

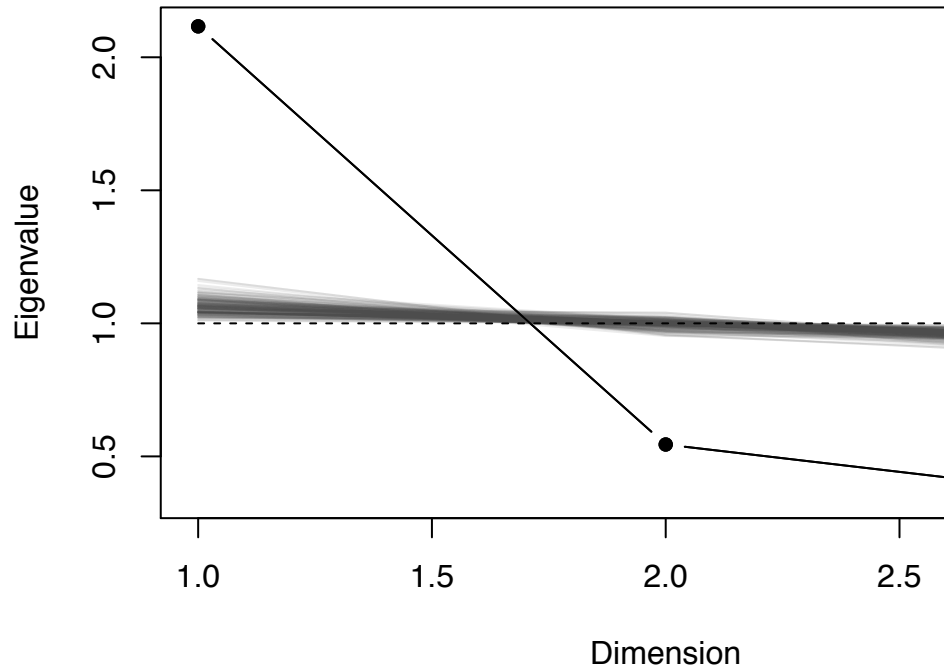

### Unidimensionality: Social Avoidance

```
## [1] "Ratio of first to second eigenvalues: 3.885"
```

```
## [1] 2.1162198 0.5447536 0.3390266
```

```
## Factor Analysis using method = minres
```

```
## Call: fa(r = grm_obj$X)
```

```
## Standardized loadings (pattern matrix) based upon correlation matrix
```

```
##      MR1  h2  u2 com
```

```
## Q64  0.89 0.78 0.22  1
```

```
## Q120 0.72 0.52 0.48  1
```

```
## Q121 0.64 0.41 0.59  1
```

```
##
```

```
##              MR1
```

```
## SS loadings  1.72
```

```
## Proportion Var 0.57
```

```
##
```

```
## Mean item complexity = 1
```

```
## Test of the hypothesis that 1 factor is sufficient.
```

```
##
```

```
## The degrees of freedom for the null model are 3 and the objective function was 0.94 with Chi Square
```

```
## The degrees of freedom for the model are 0 and the objective function was 0
```

```
##
```

```
## The root mean square of the residuals (RMSR) is 0
```

```
## The df corrected root mean square of the residuals is NA
```

```
##
```

```
## The harmonic number of observations is 574 with the empirical chi square 0 with prob < NA
```

```
## The total number of observations was 596 with Likelihood Chi Square = 0 with prob < NA
```

```
##
```

```
## Tucker Lewis Index of factoring reliability = -Inf
```

```
## Fit based upon off diagonal values = 1
```

```
## Measures of factor score adequacy
```

```

##
## Correlation of (regression) scores with factors    MR1
## Multiple R square of scores with factors          0.84
## Minimum correlation of possible factor scores     0.69

```

**Graded-Response Model: Social Avoidance**

```

##      Extrmt1 Extrmt2 Extrmt3 Extrmt4 Extrmt5 Extrmt6 Dscrmn
## Q64  -0.930  -0.284   0.199   0.574   1.013   1.524   3.766
## Q120 -1.072  -0.457   0.037   0.484   0.926   1.438   2.104
## Q121 -1.110  -0.308   0.156   0.821   1.362   2.044   1.567

```

**Test Information Function**

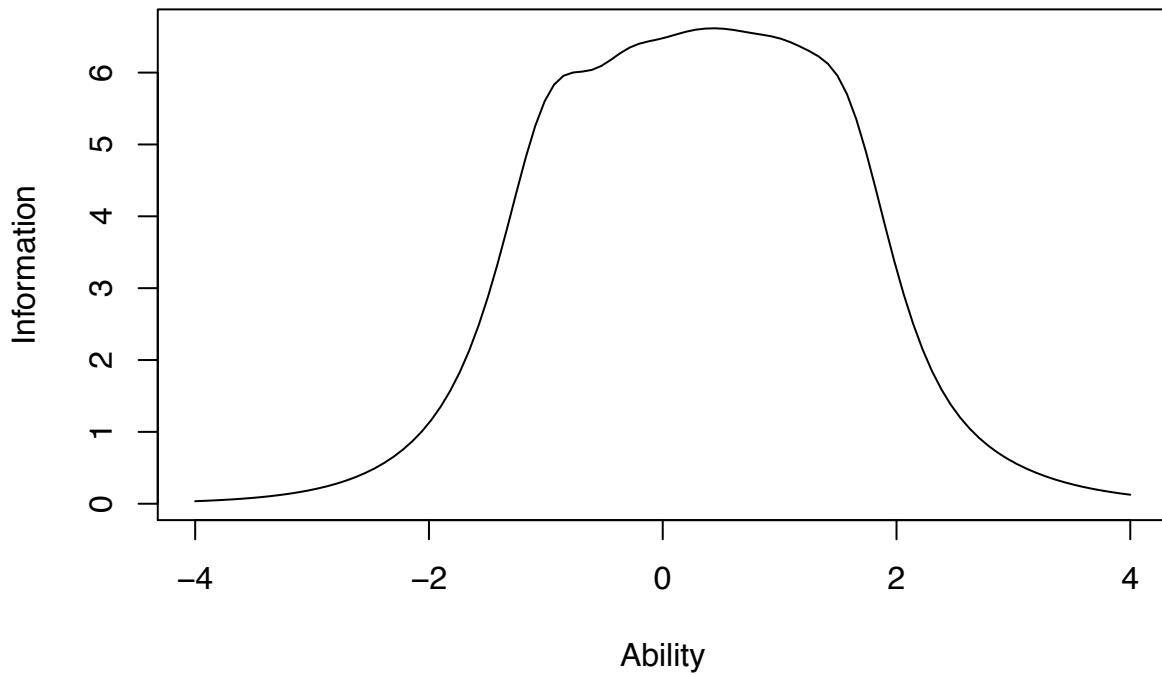

## Item Information Curves

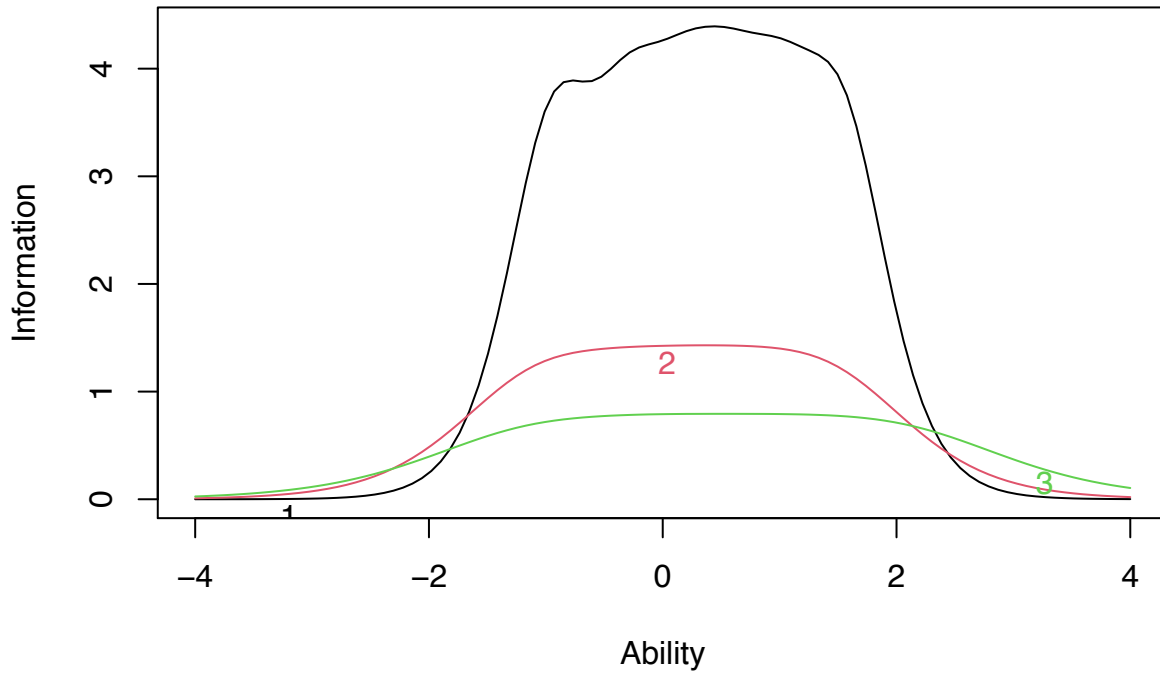

Back to top

### Gender-based DIF: Social Avoidance

## No Gender-based DIF detected

### Age-based DIF: Social Avoidance

## No age-based DIF detected

Back to top

## Worry

### Site 1

#### Reliability: Worry

## Cronbach's alpha is 0.792.

## Mean item-total correlation is 0.56.

## If each item were dropped:

| ##      | raw_alpha | std.alpha | G6(sm) | average_r | S/N | alpha se | var.r | med.r |
|---------|-----------|-----------|--------|-----------|-----|----------|-------|-------|
| ## Q39  | 0.73      | 0.73      | 0.58   | 0.58      | 2.7 | 0.022    | NA    | 0.58  |
| ## Q116 | 0.75      | 0.75      | 0.60   | 0.60      | 3.0 | 0.020    | NA    | 0.60  |
| ## Q117 | 0.67      | 0.67      | 0.50   | 0.50      | 2.0 | 0.027    | NA    | 0.50  |

## Scree Plot

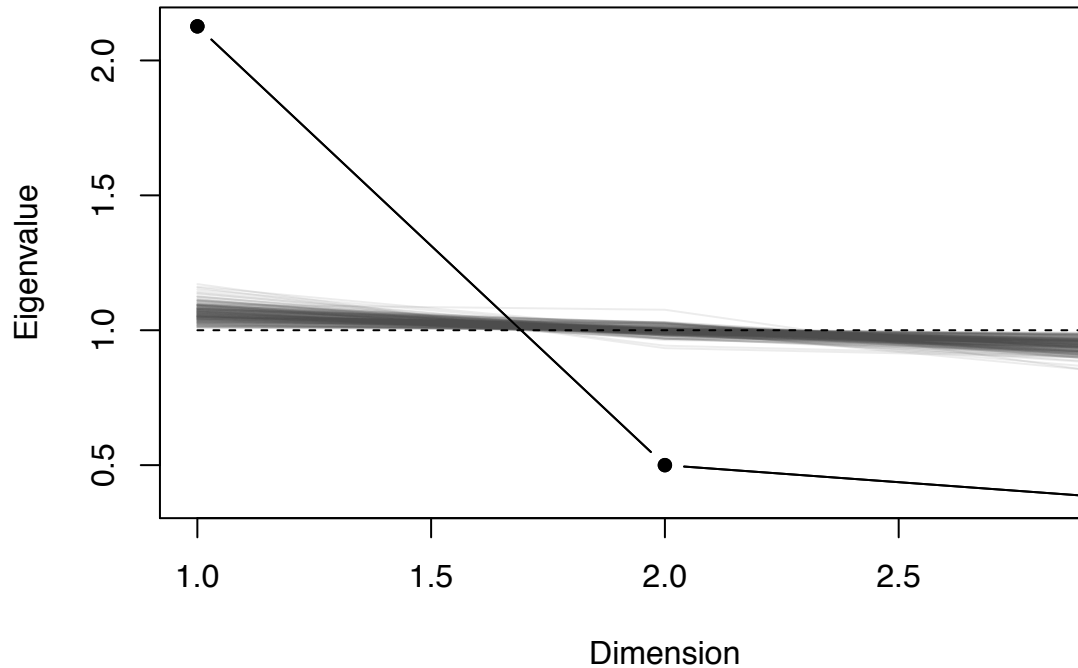

Unidimensionality: Worry

```
## [1] "Ratio of first to second eigenvalues: 4.253"
```

```
## [1] 2.1263888 0.4999869 0.3736244
```

```
## Factor Analysis using method = minres
```

```
## Call: fa(r = grm_obj$X)
```

```
## Standardized loadings (pattern matrix) based upon correlation matrix
```

```
##      MR1  h2  u2 com
```

```
## Q39  0.72 0.52 0.48  1
```

```
## Q116 0.69 0.48 0.52  1
```

```
## Q117 0.84 0.70 0.30  1
```

```
##
```

```
##              MR1
```

```
## SS loadings  1.71
```

```
## Proportion Var 0.57
```

```
##
```

```
## Mean item complexity = 1
```

```
## Test of the hypothesis that 1 factor is sufficient.
```

```
##
```

```
## The degrees of freedom for the null model are 3 and the objective function was 0.92 with Chi Square
```

```
## The degrees of freedom for the model are 0 and the objective function was 0
```

```
##
```

```
## The root mean square of the residuals (RMSR) is 0
```

```
## The df corrected root mean square of the residuals is NA
```

```
##
```

```
## The harmonic number of observations is 591 with the empirical chi square 0 with prob < NA
```

```
## The total number of observations was 617 with Likelihood Chi Square = 0 with prob < NA
```

```
##
```

```
## Tucker Lewis Index of factoring reliability = -Inf
```

```
## Fit based upon off diagonal values = 1
```

```
## Measures of factor score adequacy
```

```

##                                     MR1
## Correlation of (regression) scores with factors  0.90
## Multiple R square of scores with factors        0.81
## Minimum correlation of possible factor scores    0.63

```

**Graded-Response Model: Worry**

```

##      Extrmt1 Extrmt2 Extrmt3 Extrmt4 Extrmt5 Extrmt6 Dscrmm
## Q39  -2.109  -1.523  -1.007  -0.593   0.071   0.661  1.958
## Q116 -1.872  -1.550  -1.176  -0.691  -0.202   0.280  1.992
## Q117 -1.844  -1.286  -1.005  -0.603  -0.104   0.356  3.439

```

**Test Information Function**

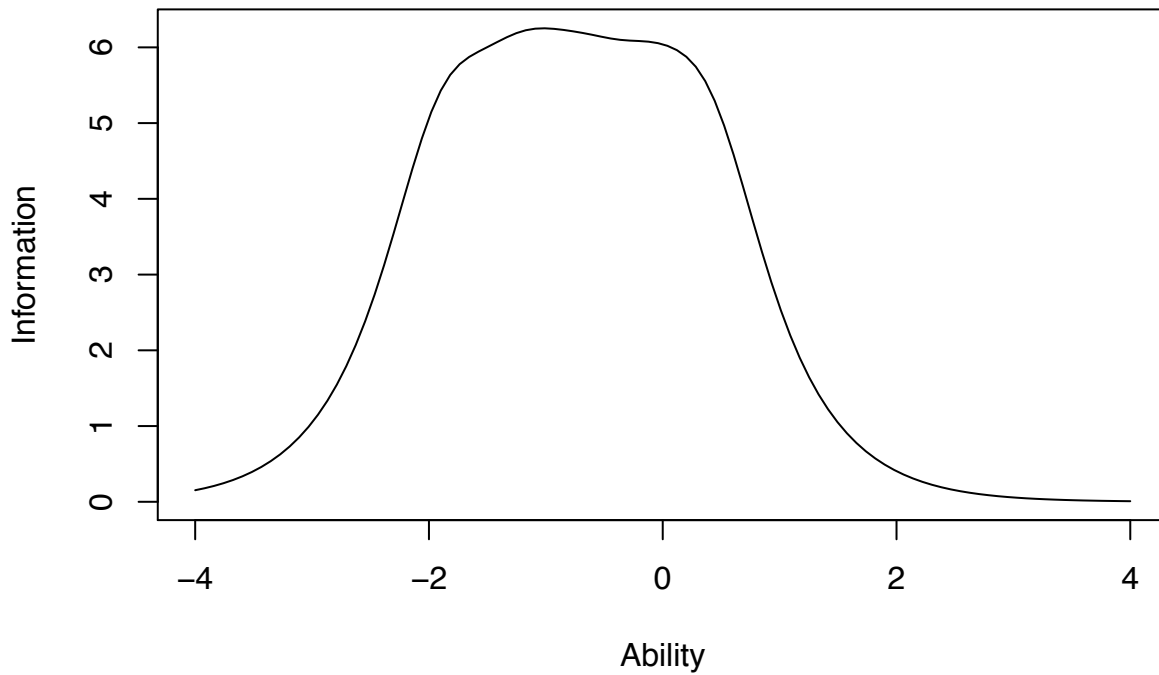



## Item Information Curves

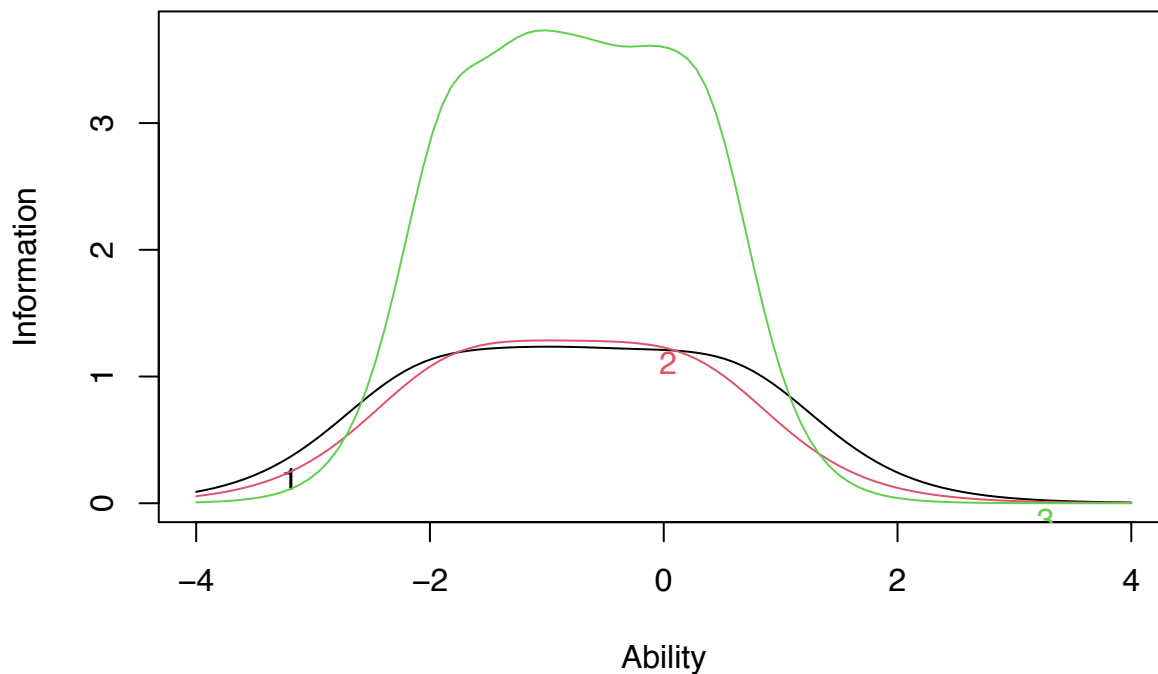

Back to top

### Site 2

#### Reliability: Worry

## Cronbach's alpha is 0.807.

## Mean item-total correlation is 0.583.

## If each item were dropped:

| ##      | raw_alpha | std.alpha | G6(smc) | average_r | S/N | alpha se | var.r | med.r |
|---------|-----------|-----------|---------|-----------|-----|----------|-------|-------|
| ## Q39  | 0.74      | 0.74      | 0.59    | 0.59      | 2.9 | 0.021    | NA    | 0.59  |
| ## Q116 | 0.77      | 0.77      | 0.63    | 0.63      | 3.4 | 0.018    | NA    | 0.63  |
| ## Q117 | 0.69      | 0.69      | 0.53    | 0.53      | 2.2 | 0.025    | NA    | 0.53  |

## Scree Plot

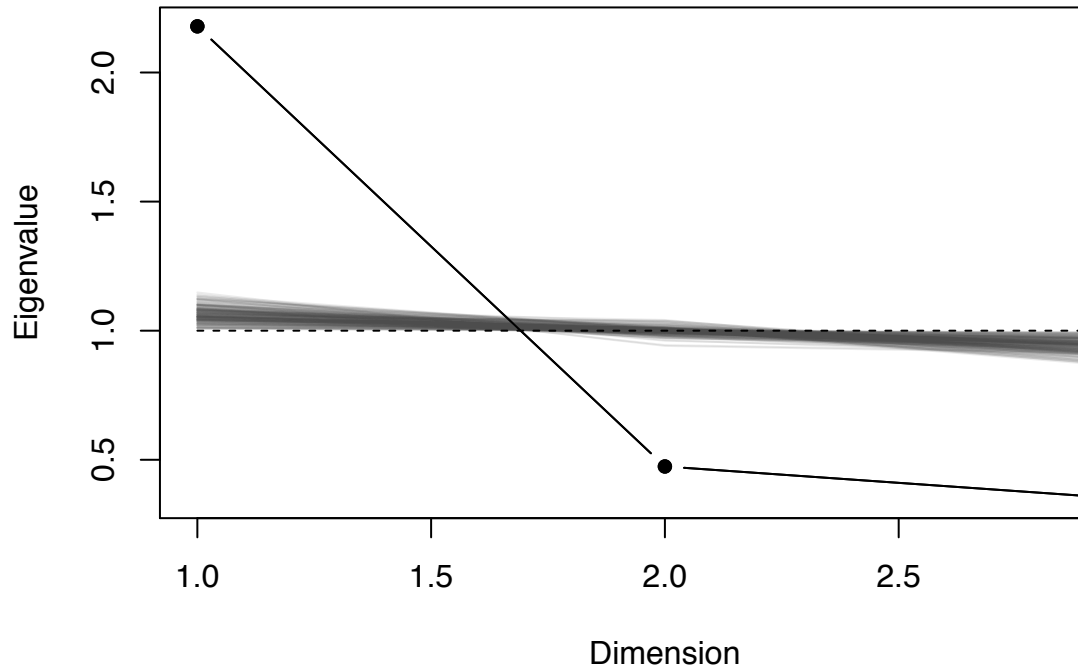

Unidimensionality: Worry

```
## [1] "Ratio of first to second eigenvalues: 4.596"
```

```
## [1] 2.178763 0.474076 0.347161
```

```
## Factor Analysis using method = minres
```

```
## Call: fa(r = grm_obj$X)
```

```
## Standardized loadings (pattern matrix) based upon correlation matrix
```

```
##      MR1  h2  u2 com
```

```
## Q39  0.76 0.57 0.43  1
```

```
## Q116 0.70 0.49 0.51  1
```

```
## Q117 0.85 0.72 0.28  1
```

```
##
```

```
##              MR1
```

```
## SS loadings  1.78
```

```
## Proportion Var 0.59
```

```
##
```

```
## Mean item complexity = 1
```

```
## Test of the hypothesis that 1 factor is sufficient.
```

```
##
```

```
## The degrees of freedom for the null model are 3 and the objective function was 1.03 with Chi Square
```

```
## The degrees of freedom for the model are 0 and the objective function was 0
```

```
##
```

```
## The root mean square of the residuals (RMSR) is 0
```

```
## The df corrected root mean square of the residuals is NA
```

```
##
```

```
## The harmonic number of observations is 572 with the empirical chi square 0 with prob < NA
```

```
## The total number of observations was 596 with Likelihood Chi Square = 0 with prob < NA
```

```
##
```

```
## Tucker Lewis Index of factoring reliability = NaN
```

```
## Fit based upon off diagonal values = 1
```

```
## Measures of factor score adequacy
```

```
##                                     MR1
## Correlation of (regression) scores with factors 0.91
## Multiple R square of scores with factors      0.83
## Minimum correlation of possible factor scores  0.66
```

**Graded-Response Model: Worry**

```
##      Extrmt1 Extrmt2 Extrmt3 Extrmt4 Extrmt5 Extrmt6 Dscrmm
## Q39  -1.844  -1.087  -0.577  -0.154   0.365   0.849  2.352
## Q116 -1.844  -1.403  -0.961  -0.565  -0.112   0.497  2.106
## Q117 -1.682  -1.157  -0.780  -0.394   0.167   0.718  3.147
```

**Test Information Function**

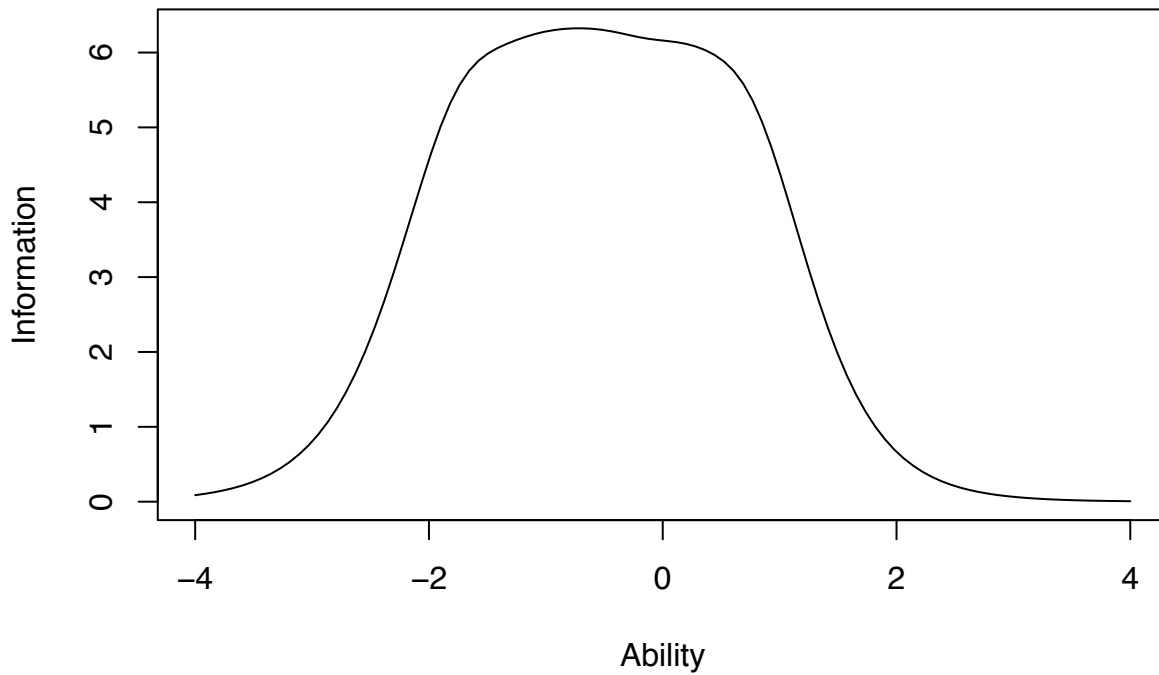

## Item Information Curves

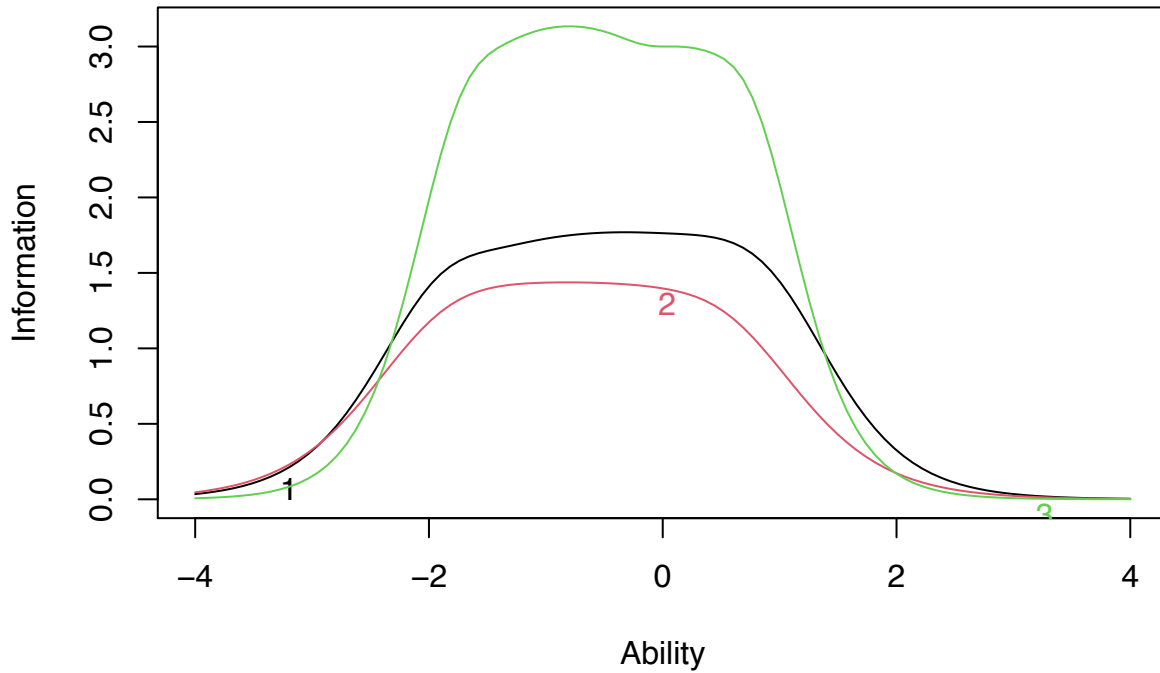

Back to top

### Gender-based DIF: Worry

## No Gender-based DIF detected

### Age-based DIF: Worry

## No age-based DIF detected

Back to top

## Cognitive Problems

### Site 1

#### Reliability: Cognitive Problems

## Cronbach's alpha is 0.893.

## Mean item-total correlation is 0.581.

## If each item were dropped:

| ##      | raw_alpha | std.alpha | G6(sm) | average_r | S/N | alpha se | var.r  | med.r |
|---------|-----------|-----------|--------|-----------|-----|----------|--------|-------|
| ## Q142 | 0.87      | 0.87      | 0.87   | 0.58      | 7.0 | 0.0081   | 0.0133 | 0.58  |
| ## Q143 | 0.87      | 0.87      | 0.86   | 0.58      | 6.9 | 0.0081   | 0.0074 | 0.58  |
| ## Q144 | 0.86      | 0.86      | 0.86   | 0.55      | 6.1 | 0.0091   | 0.0120 | 0.51  |
| ## Q145 | 0.87      | 0.87      | 0.86   | 0.58      | 6.9 | 0.0082   | 0.0079 | 0.58  |
| ## Q146 | 0.89      | 0.89      | 0.89   | 0.61      | 7.8 | 0.0074   | 0.0118 | 0.63  |
| ## Q147 | 0.88      | 0.88      | 0.87   | 0.58      | 7.0 | 0.0080   | 0.0141 | 0.53  |

## Scree Plot

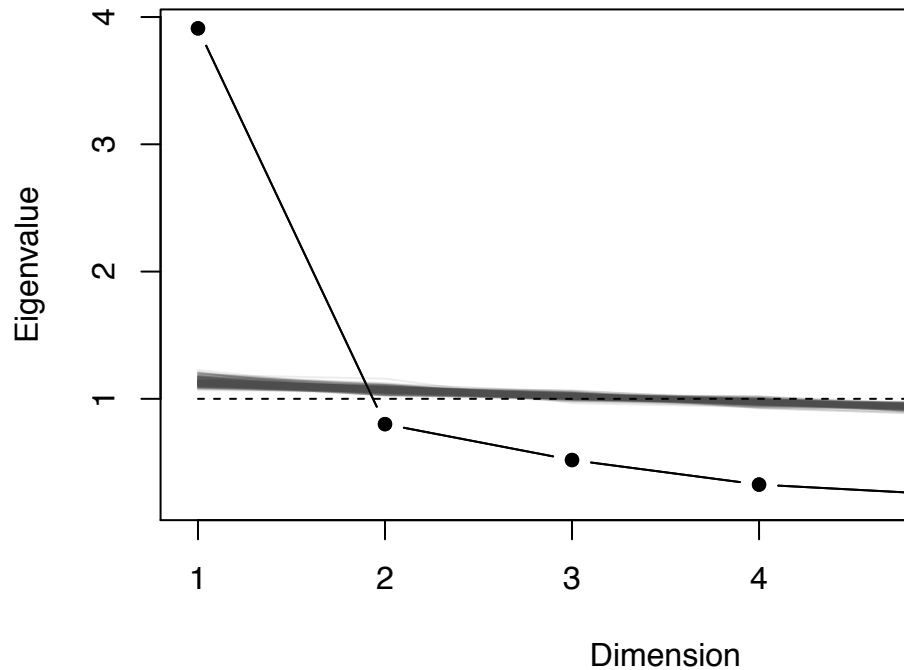

### Unidimensionality: Cognitive Problems

```
## [1] "Ratio of first to second eigenvalues: 4.882"
## [1] 3.9111337 0.8010990 0.5190344 0.3259243 0.2476788 0.1951297
## Factor Analysis using method = minres
## Call: fa(r = grm_obj$X)
## Standardized loadings (pattern matrix) based upon correlation matrix
##      MR1  h2  u2 com
## Q142 0.76 0.58 0.42  1
## Q143 0.77 0.60 0.40  1
## Q144 0.86 0.75 0.25  1
## Q145 0.77 0.60 0.40  1
## Q146 0.66 0.44 0.56  1
## Q147 0.74 0.55 0.45  1
##
##              MR1
## SS loadings  3.51
## Proportion Var 0.58
##
## Mean item complexity = 1
## Test of the hypothesis that 1 factor is sufficient.
##
## The degrees of freedom for the null model are 15 and the objective function was 3.66 with Chi Squ
## The degrees of freedom for the model are 9 and the objective function was 0.56
##
## The root mean square of the residuals (RMSR) is 0.08
## The df corrected root mean square of the residuals is 0.11
##
## The harmonic number of observations is 590 with the empirical chi square 125.13 with prob < 1.2e-
## The total number of observations was 617 with Likelihood Chi Square = 341.82 with prob < 3.4e-6
##
```

```

## Tucker Lewis Index of factoring reliability = 0.751
## RMSEA index = 0.245 and the 90 % confidence intervals are 0.223 0.268
## BIC = 283.99
## Fit based upon off diagonal values = 0.98
## Measures of factor score adequacy
##
## Correlation of (regression) scores with factors MR1 0.95
## Multiple R square of scores with factors 0.90
## Minimum correlation of possible factor scores 0.81

```

**Graded-Response Model: Cognitive Problems**

| ##      | Extrmt1 | Extrmt2 | Extrmt3 | Extrmt4 | Extrmt5 | Extrmt6 | Dscrmn |
|---------|---------|---------|---------|---------|---------|---------|--------|
| ## Q142 | -1.448  | -0.902  | -0.382  | 0.054   | 0.566   | 1.003   | 2.293  |
| ## Q143 | -1.257  | -0.678  | -0.309  | 0.096   | 0.608   | 1.173   | 2.414  |
| ## Q144 | -0.941  | -0.460  | -0.023  | 0.410   | 0.823   | 1.310   | 3.496  |
| ## Q145 | -0.808  | -0.267  | 0.077   | 0.494   | 1.009   | 1.514   | 2.397  |
| ## Q146 | -1.341  | -0.702  | -0.190  | 0.479   | 1.069   | 1.977   | 1.563  |
| ## Q147 | -1.378  | -0.737  | -0.295  | 0.149   | 0.761   | 1.354   | 2.060  |

**Test Information Function**

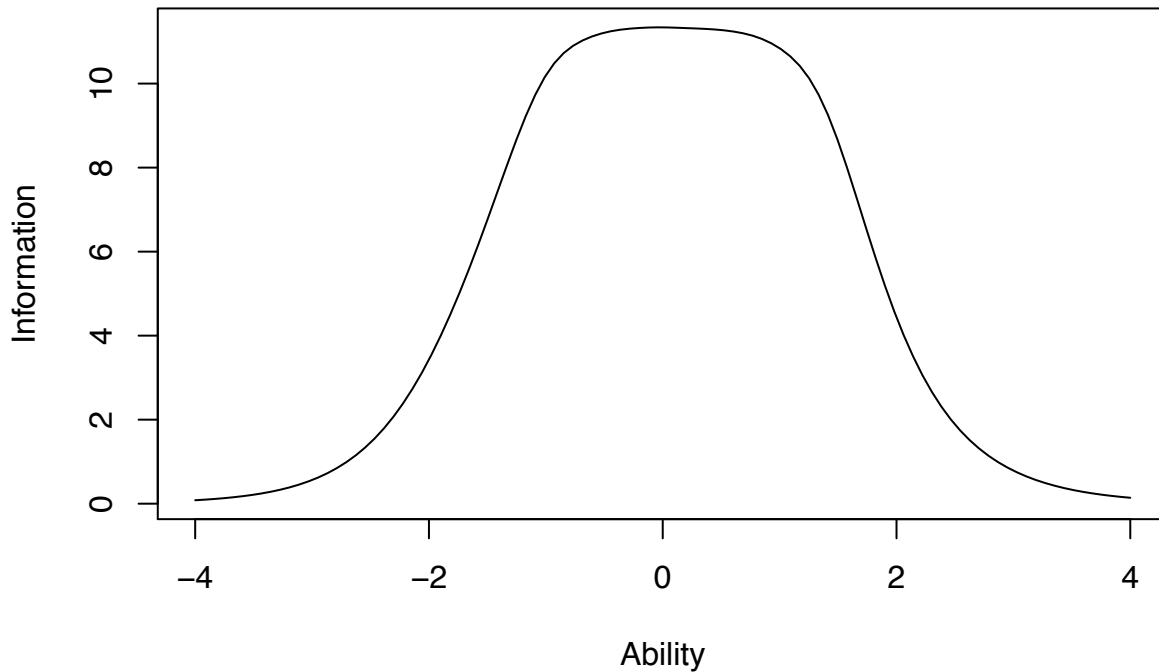

## Item Information Curves

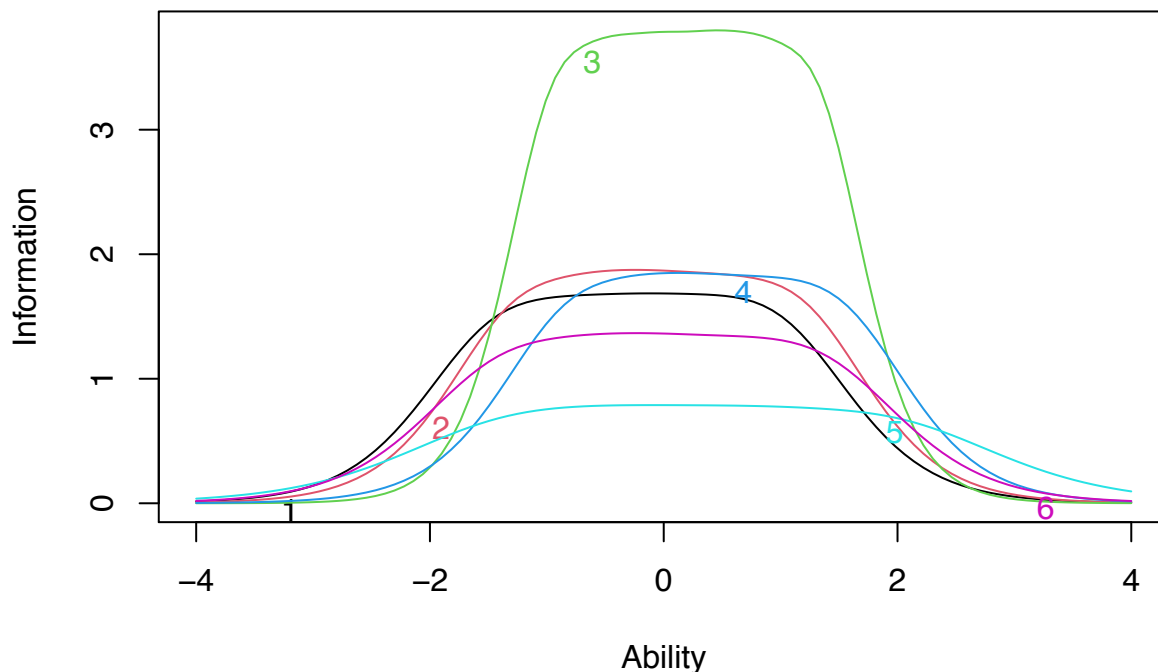

[Back to top](#)

### Site 2

#### Reliability: Cognitive Problems

## Cronbach's alpha is 0.9.

## Mean item-total correlation is 0.6.

## If each item were dropped:

| ##      | raw_alpha | std.alpha | G6(smc) | average_r | S/N | alpha se | var.r  | med.r |
|---------|-----------|-----------|---------|-----------|-----|----------|--------|-------|
| ## Q142 | 0.88      | 0.88      | 0.88    | 0.60      | 7.6 | 0.0076   | 0.0073 | 0.60  |
| ## Q143 | 0.88      | 0.88      | 0.87    | 0.60      | 7.4 | 0.0077   | 0.0061 | 0.60  |
| ## Q144 | 0.87      | 0.87      | 0.87    | 0.57      | 6.8 | 0.0085   | 0.0078 | 0.53  |
| ## Q145 | 0.88      | 0.88      | 0.87    | 0.60      | 7.6 | 0.0075   | 0.0060 | 0.60  |
| ## Q146 | 0.89      | 0.89      | 0.89    | 0.62      | 8.3 | 0.0071   | 0.0087 | 0.65  |
| ## Q147 | 0.88      | 0.88      | 0.88    | 0.60      | 7.4 | 0.0077   | 0.0096 | 0.55  |

## Scree Plot

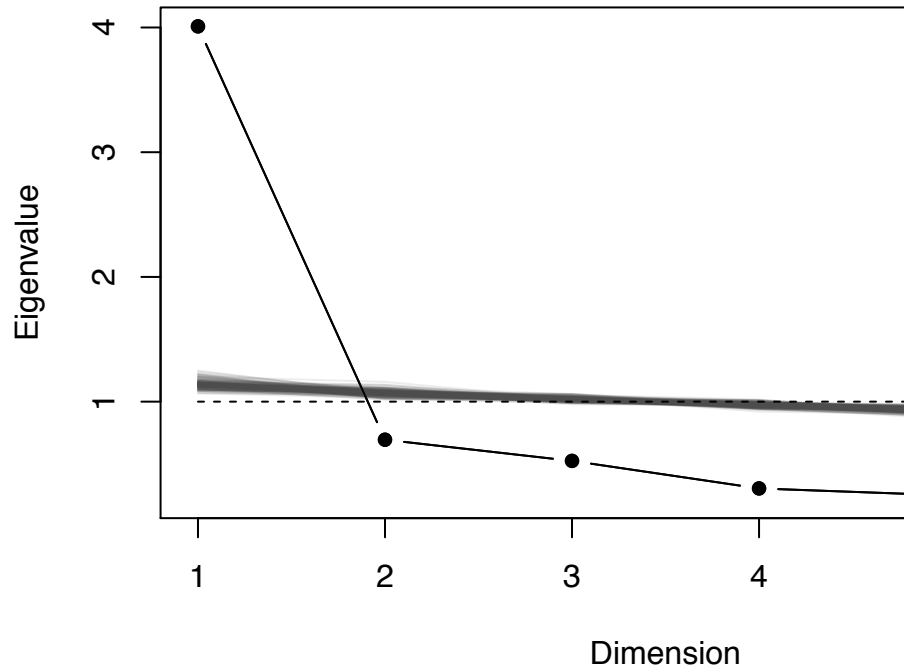

### Unidimensionality: Cognitive Problems

```
## [1] "Ratio of first to second eigenvalues: 5.771"
## [1] 4.0091280 0.6946725 0.5250306 0.3042152 0.2494068 0.2175470
## Factor Analysis using method = minres
## Call: fa(r = grm_obj$X)
## Standardized loadings (pattern matrix) based upon correlation matrix
##      MR1  h2  u2 com
## Q142 0.77 0.59 0.41  1
## Q143 0.79 0.62 0.38  1
## Q144 0.86 0.74 0.26  1
## Q145 0.76 0.59 0.41  1
## Q146 0.70 0.49 0.51  1
## Q147 0.78 0.61 0.39  1
##
##              MR1
## SS loadings   3.62
## Proportion Var 0.60
##
## Mean item complexity = 1
## Test of the hypothesis that 1 factor is sufficient.
##
## The degrees of freedom for the null model are 15 and the objective function was 3.72 with Chi Squa
## The degrees of freedom for the model are 9 and the objective function was 0.44
##
## The root mean square of the residuals (RMSR) is 0.07
## The df corrected root mean square of the residuals is 0.09
##
## The harmonic number of observations is 574 with the empirical chi square 85.01 with prob < 1.6e-
## The total number of observations was 596 with Likelihood Chi Square = 258.79 with prob < 1.4e-5
##
```



```

## Tucker Lewis Index of factoring reliability = 0.81
## RMSEA index = 0.216 and the 90 % confidence intervals are 0.194 0.239
## BIC = 201.27
## Fit based upon off diagonal values = 0.99
## Measures of factor score adequacy
##
## Correlation of (regression) scores with factors MR1 0.95
## Multiple R square of scores with factors 0.91
## Minimum correlation of possible factor scores 0.81

```

**Graded-Response Model: Cognitive Problems**

| ##      | Extrmt1 | Extrmt2 | Extrmt3 | Extrmt4 | Extrmt5 | Extrmt6 | Dscrmn |
|---------|---------|---------|---------|---------|---------|---------|--------|
| ## Q142 | -1.085  | -0.441  | -0.075  | 0.395   | 0.849   | 1.295   | 2.682  |
| ## Q143 | -1.275  | -0.628  | -0.164  | 0.284   | 0.716   | 1.205   | 2.315  |
| ## Q144 | -0.650  | -0.131  | 0.251   | 0.564   | 0.949   | 1.307   | 3.817  |
| ## Q145 | -0.900  | -0.198  | 0.223   | 0.745   | 1.188   | 1.685   | 2.234  |
| ## Q146 | -0.838  | -0.120  | 0.241   | 0.881   | 1.482   | 2.113   | 1.903  |
| ## Q147 | -0.858  | -0.307  | 0.105   | 0.645   | 1.108   | 1.643   | 2.578  |

**Test Information Function**

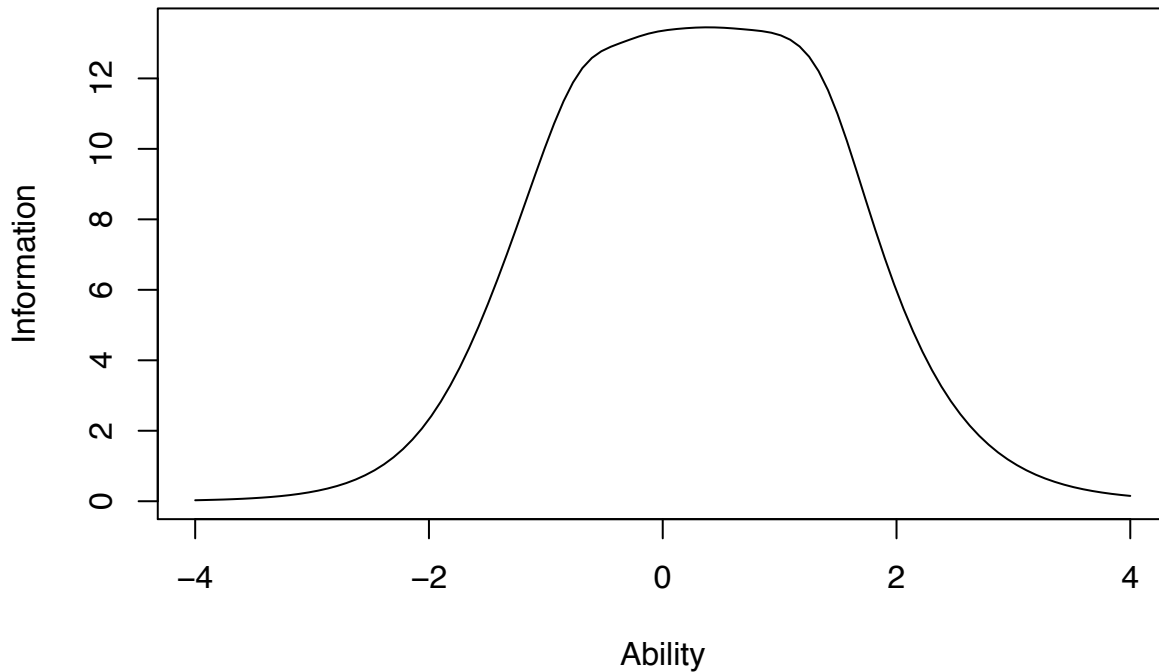

## Item Information Curves

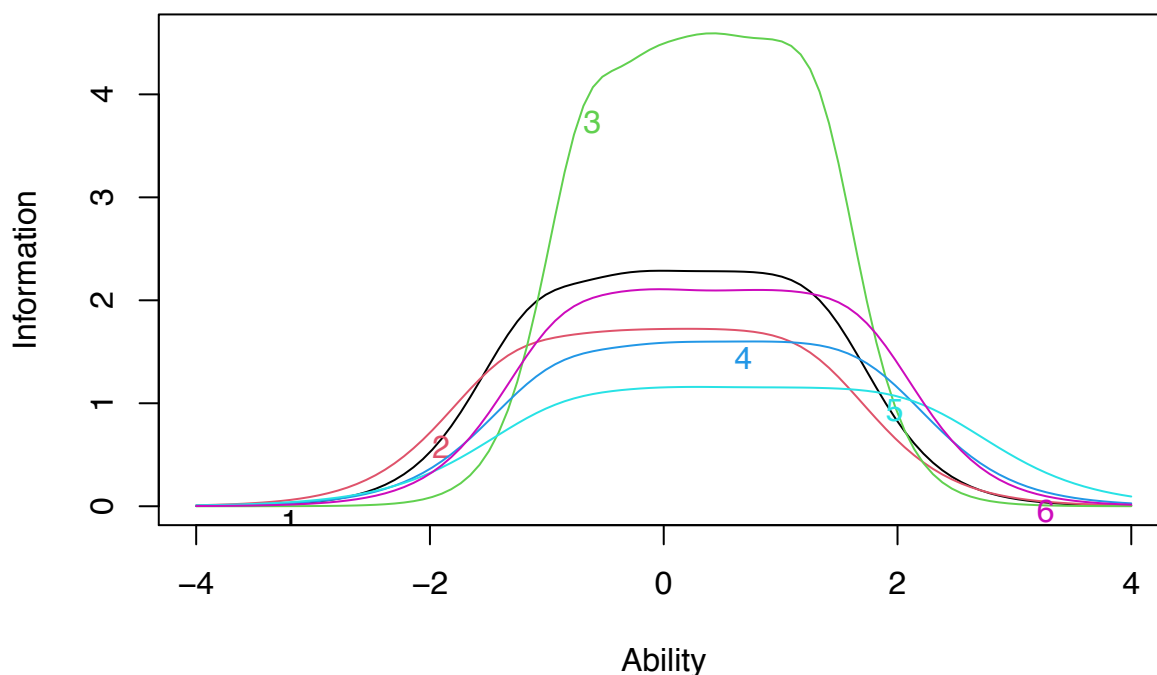

Back to top

### Site DIF

```
## Call:
## lordif::lordif(resp.data = as.data.frame(merged_data), group = site)
##
##   Number of DIF groups: 2
##
##   Number of items flagged for DIF: 4 of 6
##
##   Items flagged: 2, 4, 5, 6
##
##   Number of iterations for purification: 2 of 10
##
##   Detection criterion: Chisqr
##
##   Threshold: alpha = 0.01
##
##   item ncat  chi12  chi13  chi23
## 1     1     7 0.0160 0.0478 0.5980
## 2     2     7 0.0052 0.0091 0.2078
## 3     3     7 0.6611 0.2717 0.1202
## 4     4     7 0.0115 0.0002 0.0011
## 5     5     7 0.0006 0.0028 0.9669
## 6     6     7 0.0000 0.0002 0.9054
```

### Trait Distributions

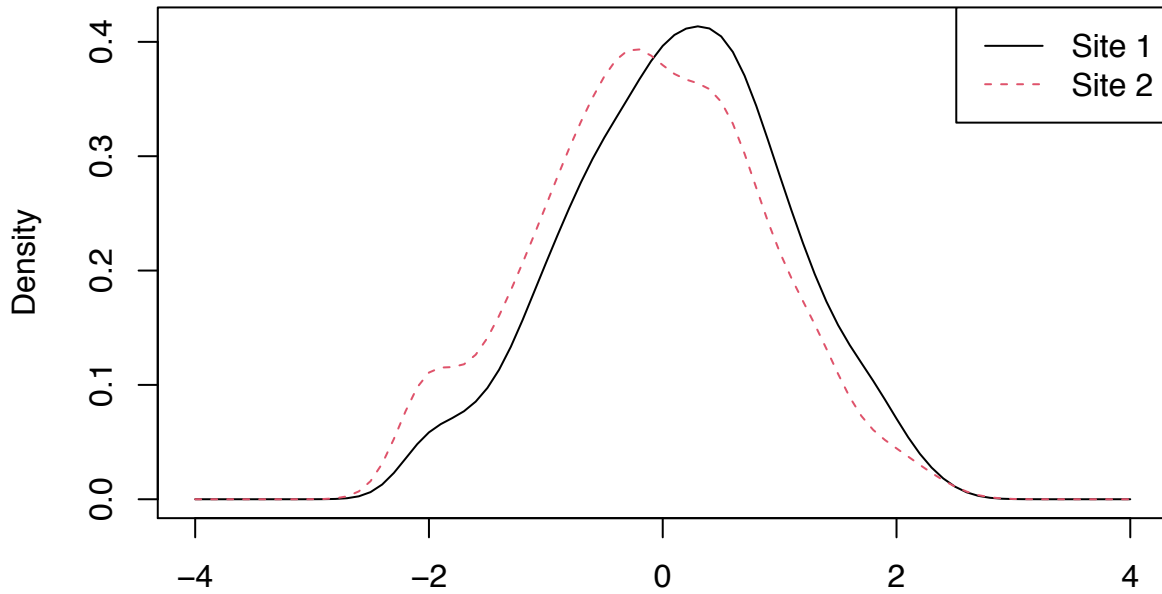

### Item True Score Functions – Item 2 Differences in Item True Score Function

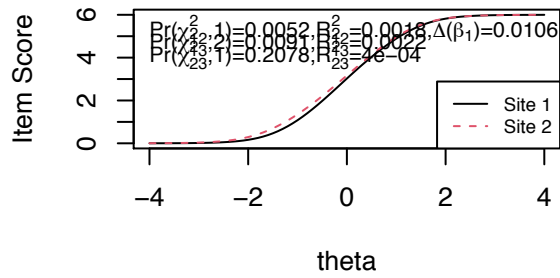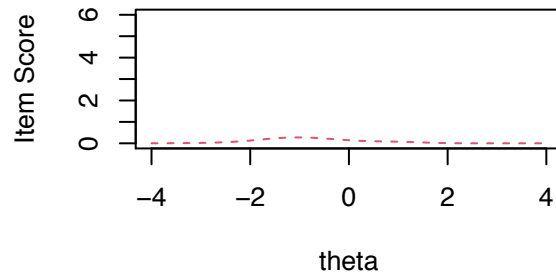

### Item Response Functions

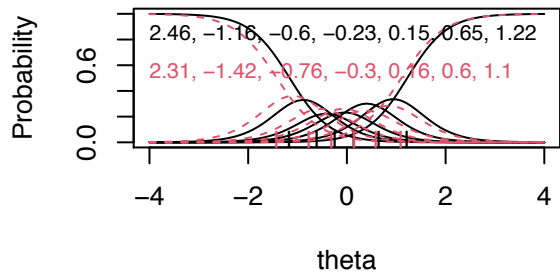

### Impact (Weighted by Density)

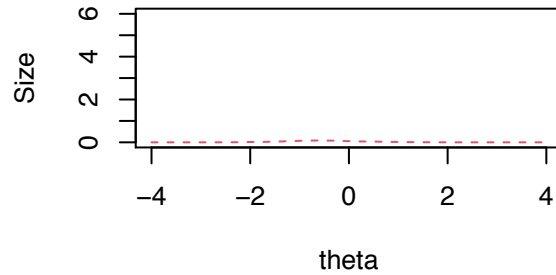

### Item True Score Functions – Item 4

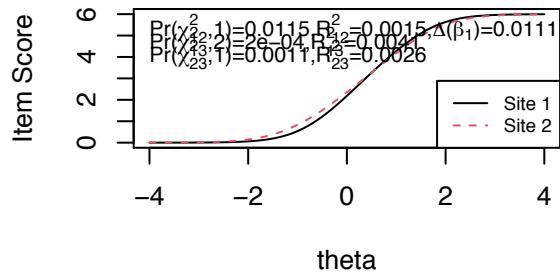

### Differences in Item True Score Function

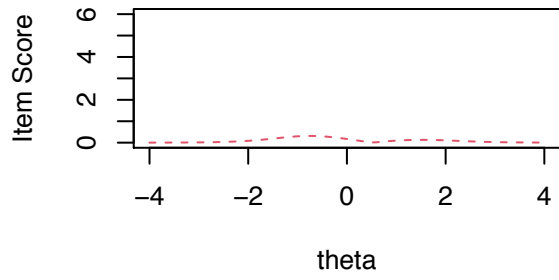

### Item Response Functions

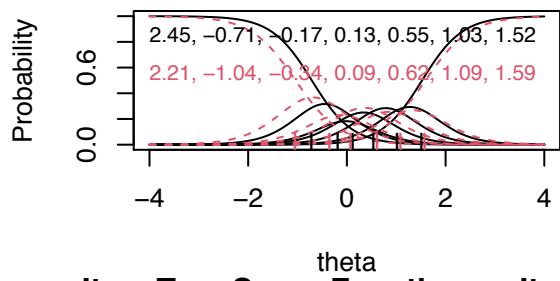

### Impact (Weighted by Density)

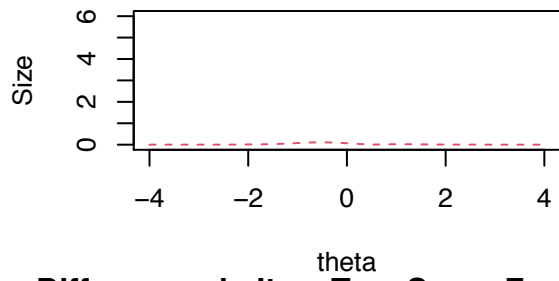

### Item True Score Functions – Item 5

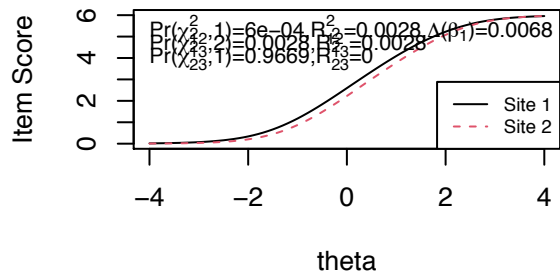

### Differences in Item True Score Function

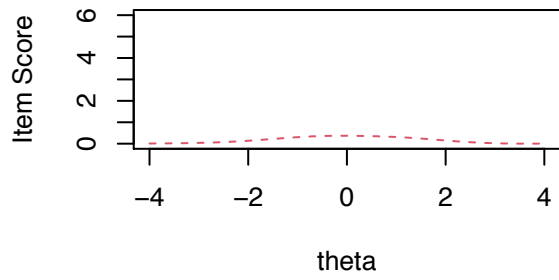

### Item Response Functions

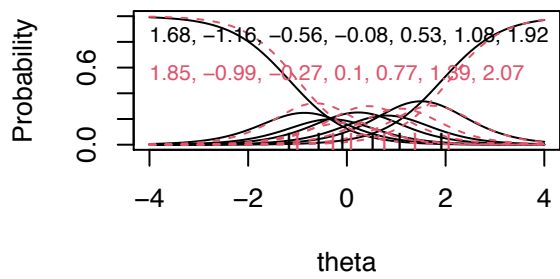

### Impact (Weighted by Density)

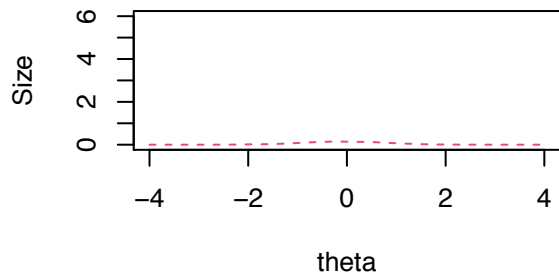

### Item True Score Functions – Item 6

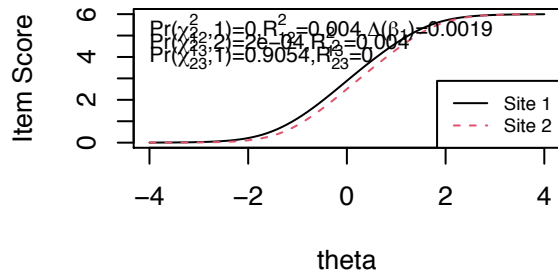

### Differences in Item True Score Function

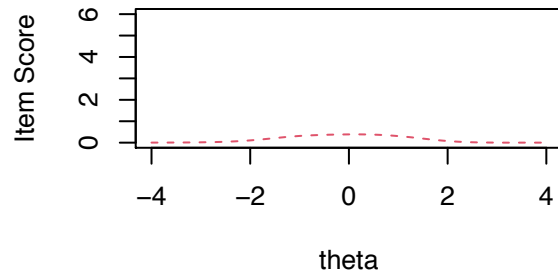

### Item Response Functions

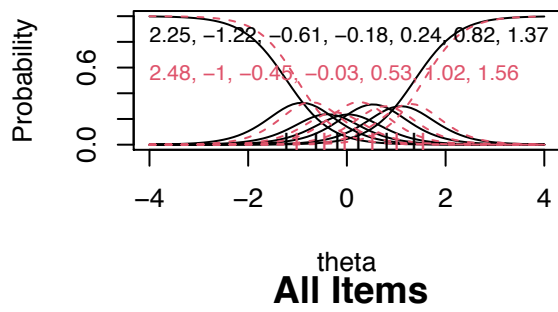

### Impact (Weighted by Density)

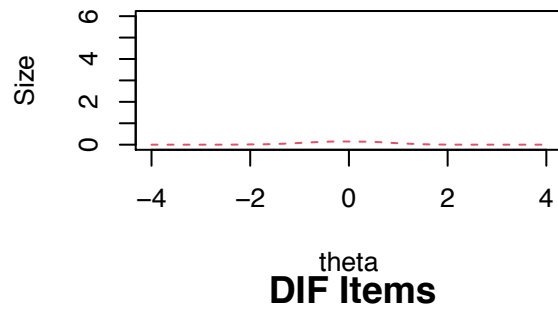

theta  
**All Items**

theta  
**DIF Items**

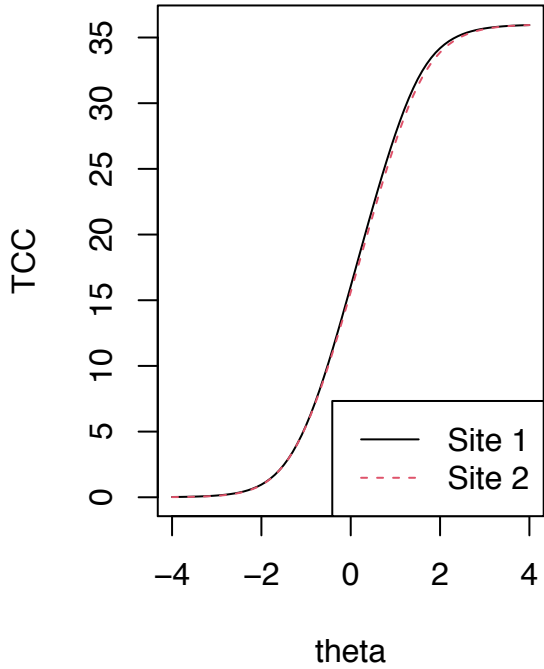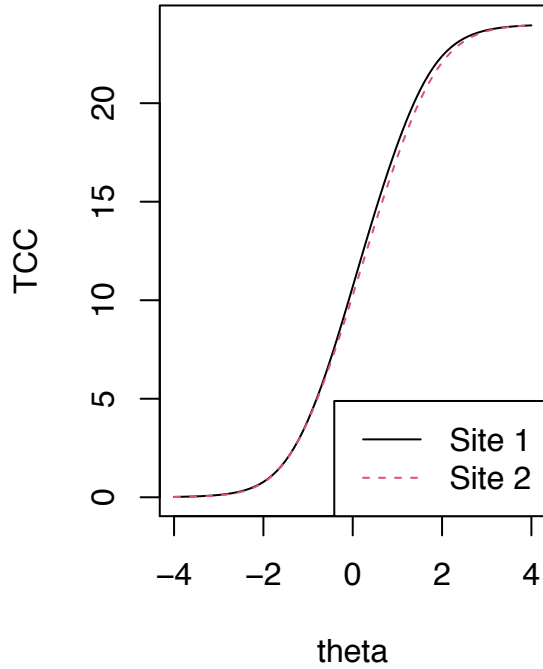

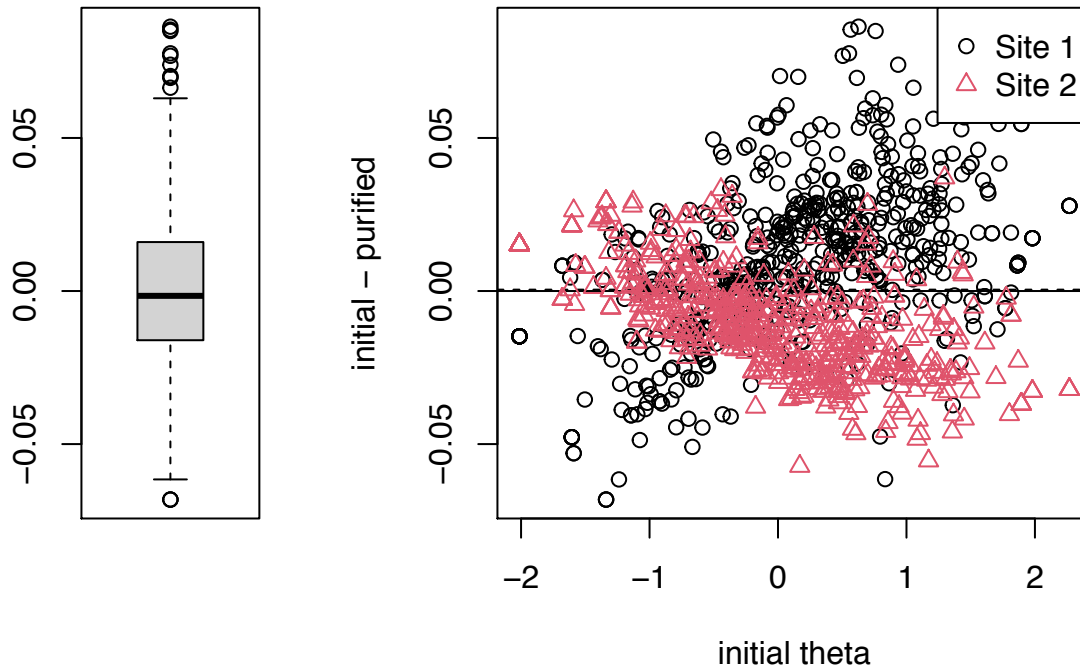

Back to top

### Gender-based DIF: Cognitive Problems

```
## Call:
## lordif::lordif(resp.data = as.data.frame(sex.data), group = sex)
##
##   Number of DIF groups: 2
##
##   Number of items flagged for DIF: 2 of 6
##
##   Items flagged: 5, 6
##
##   Number of iterations for purification: 2 of 10
##
##   Detection criterion: Chisqr
##
##   Threshold: alpha = 0.01
##
##   item ncat  chi12  chi13  chi23
## 1     1     7 0.3749 0.1503 0.0831
## 2     2     7 0.2049 0.2124 0.2220
## 3     3     7 0.2336 0.3152 0.3455
## 4     4     7 0.2022 0.2066 0.2165
## 5     5     7 0.0097 0.0336 0.7521
## 6     6     7 0.0054 0.0160 0.4660
```

### Trait Distributions

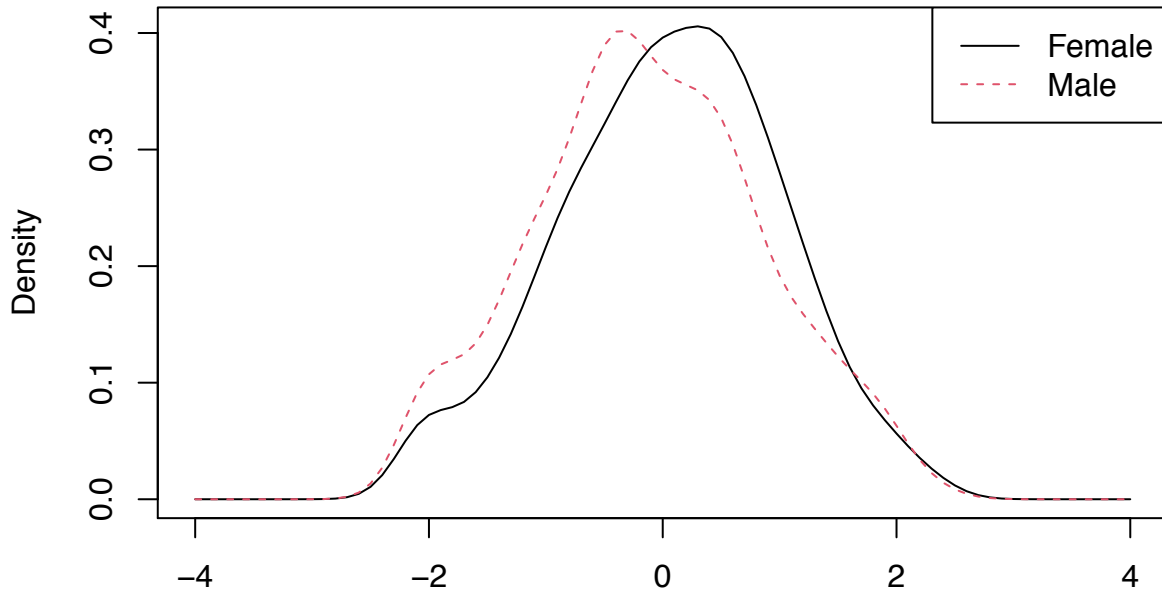

### Item True Score Functions – Item 5 Differences in Item True Score Function

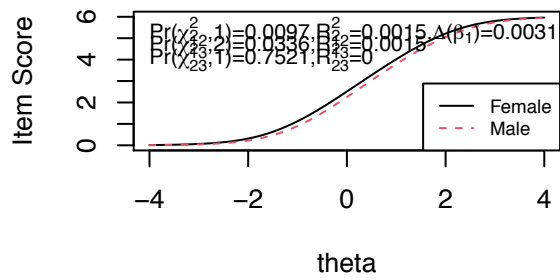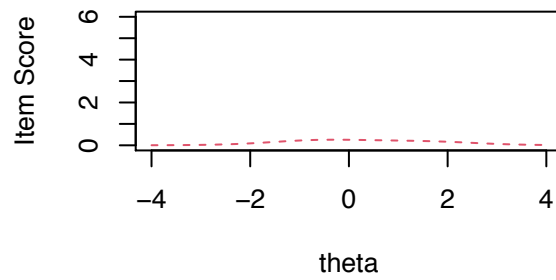

### Item Response Functions

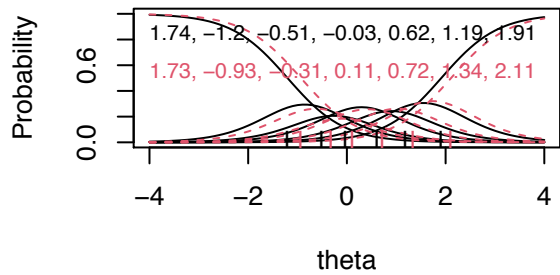

### Impact (Weighted by Density)

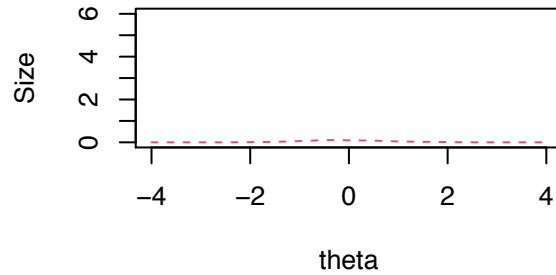

**Item True Score Functions – Item 6**

**Differences in Item True Score Function**

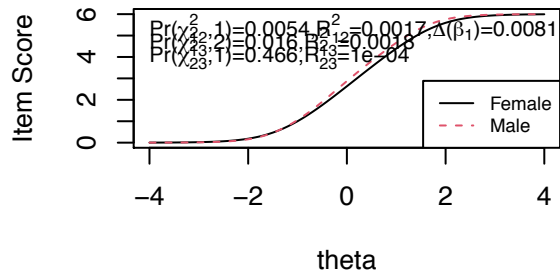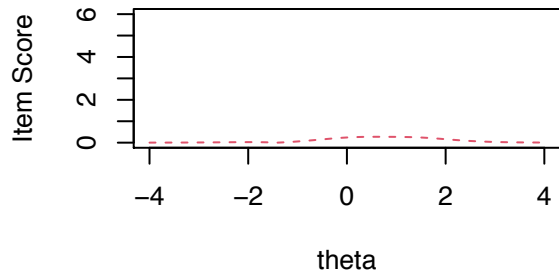

**Item Response Functions**

**Impact (Weighted by Density)**

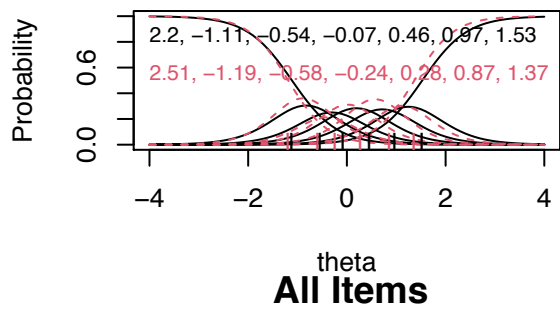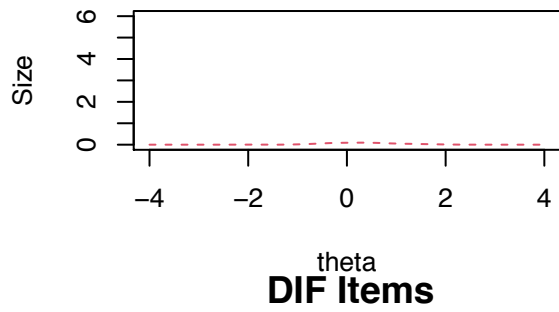

**All Items**

**DIF Items**

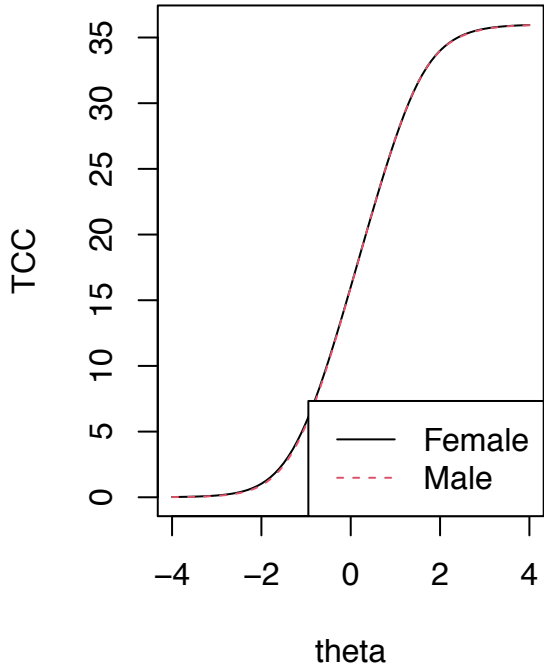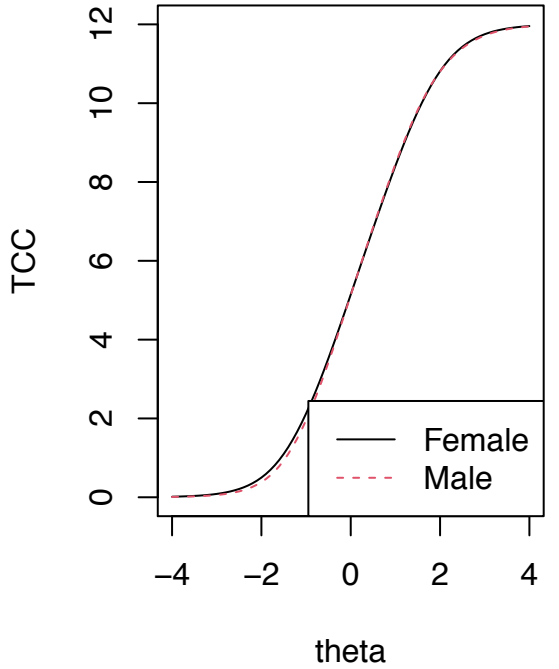



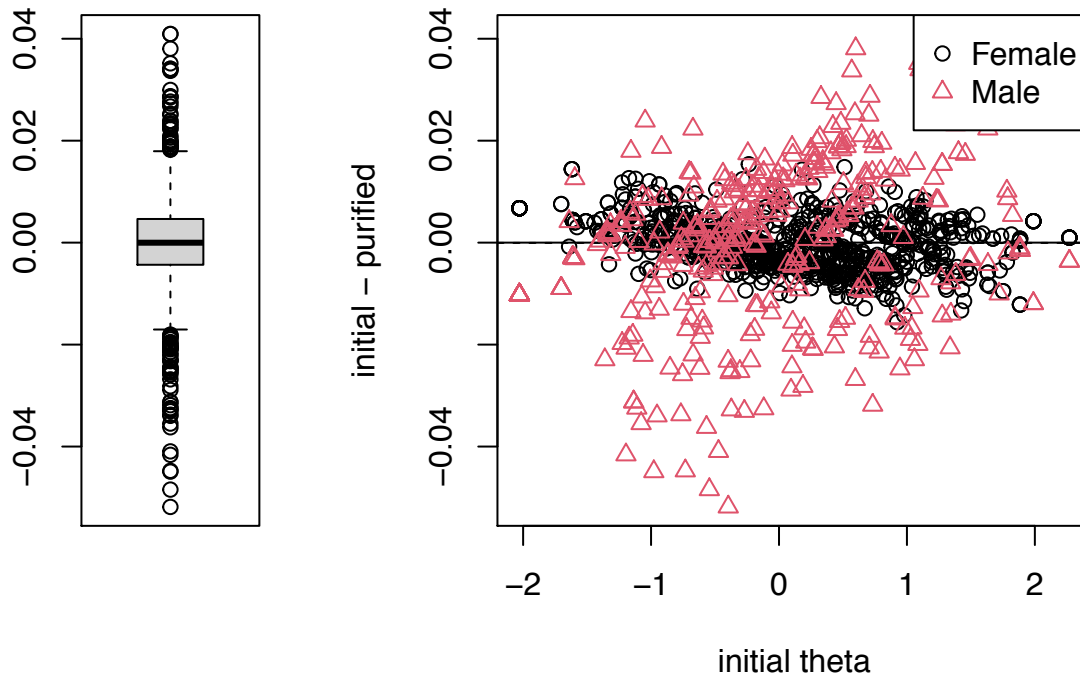

#### Age-based DIF: Cognitive Problems

```
## Call:
## lordif::lordif(resp.data = as.data.frame(age.data), group = age)
##
## Number of DIF groups: 2
##
## Number of items flagged for DIF: 4 of 6
##
## Items flagged: 1, 2, 4, 6
##
## Number of iterations for purification: 2 of 10
##
## Detection criterion: Chisqr
##
## Threshold: alpha = 0.01
##
## item ncat chi12 chi13 chi23
## 1 1 7 0.0000 0.0000 0.7268
## 2 2 7 0.0008 0.0015 0.1834
## 3 3 7 0.2718 0.3282 0.3123
## 4 4 7 0.0011 0.0046 0.7475
## 5 5 7 0.6536 0.1278 0.0479
## 6 6 7 0.0000 0.0000 0.1619
```

### Trait Distributions

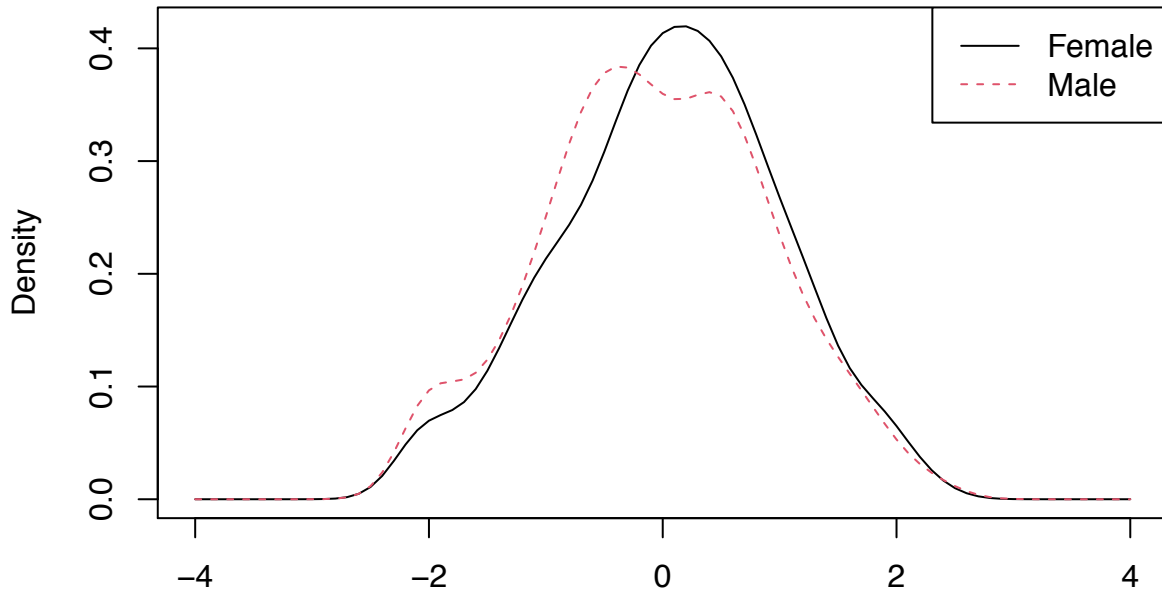

### Item True Score Functions – Item 1 Differences in Item True Score Function

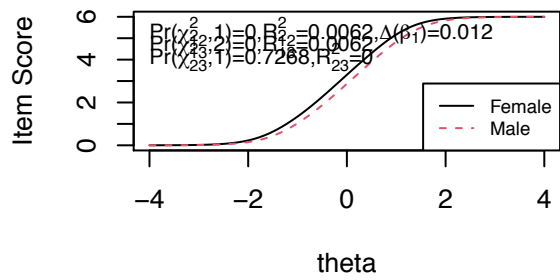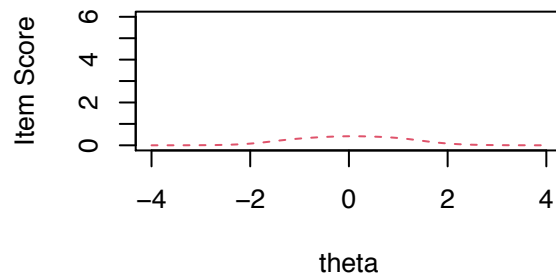

### Item Response Functions

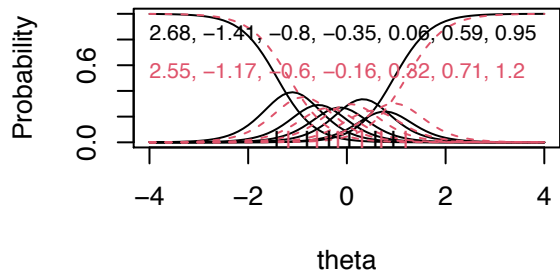

### Impact (Weighted by Density)

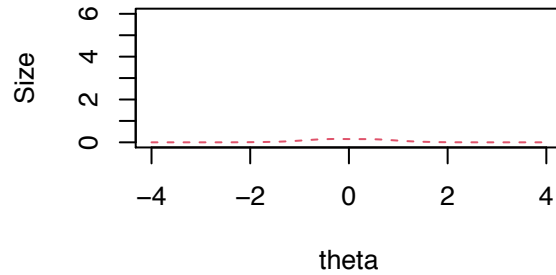

### Item True Score Functions – Item 2

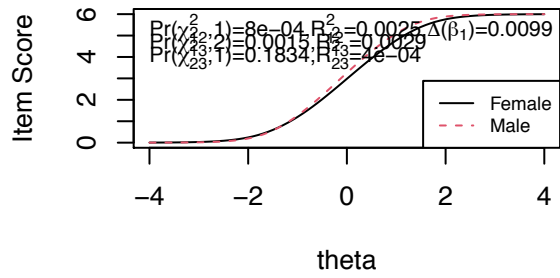

### Differences in Item True Score Function

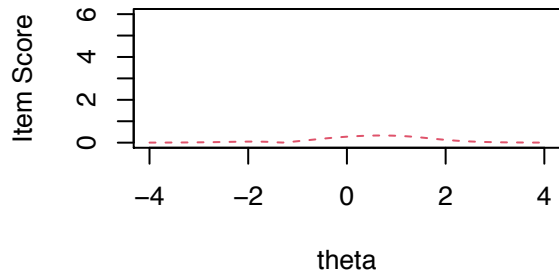

### Item Response Functions

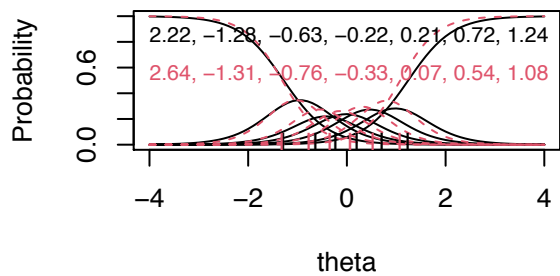

### Impact (Weighted by Density)

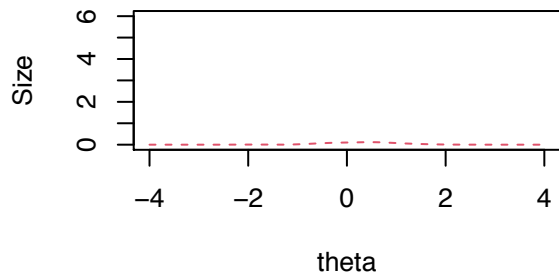

### Item True Score Functions – Item 4

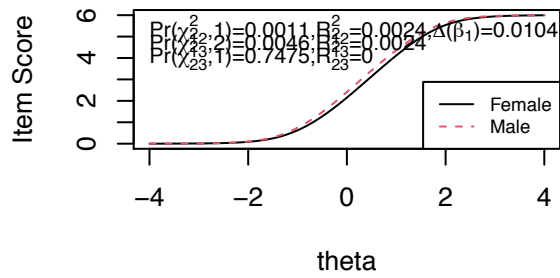

### Differences in Item True Score Function

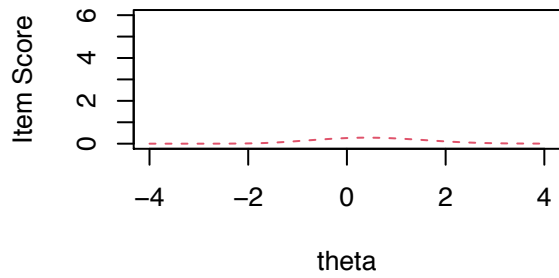

### Item Response Functions

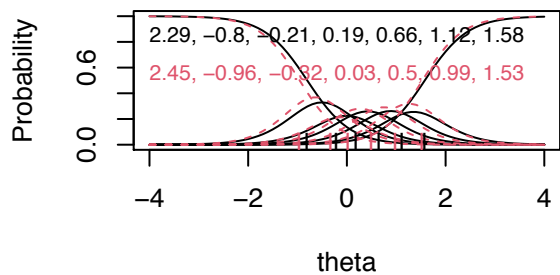

### Impact (Weighted by Density)

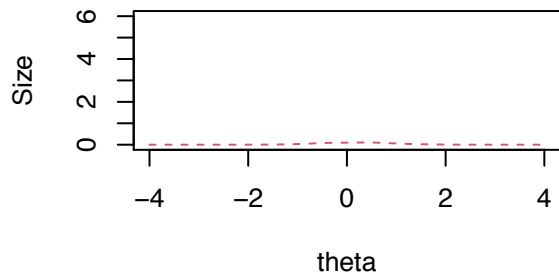

**Item True Score Functions – Item 6**

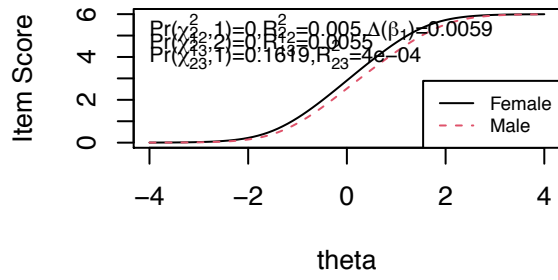

**Differences in Item True Score Function**

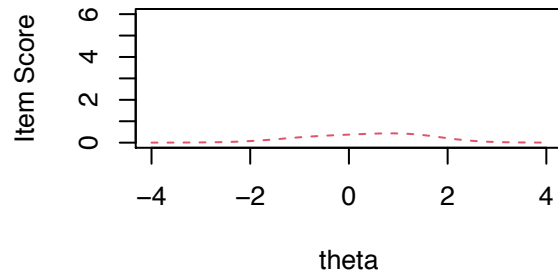

**Item Response Functions**

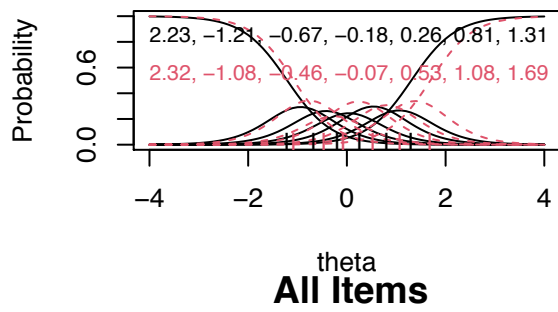

**Impact (Weighted by Density)**

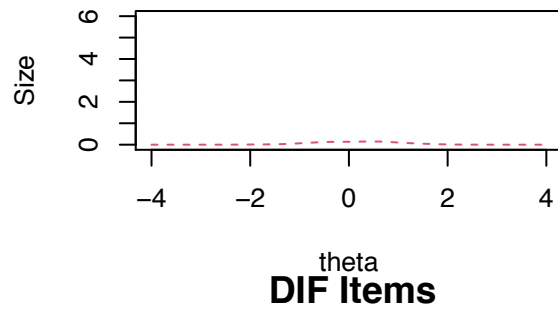

**All Items**

**DIF Items**

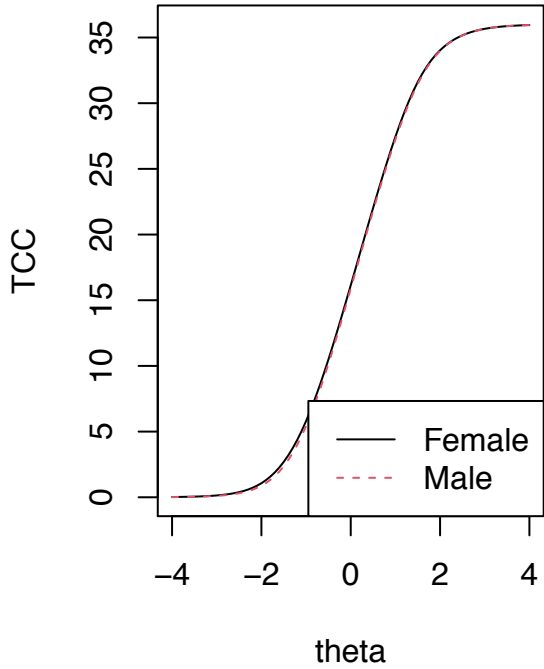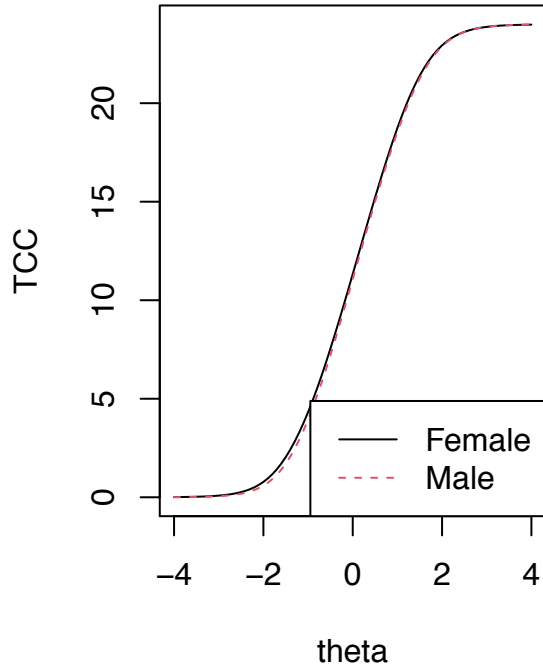

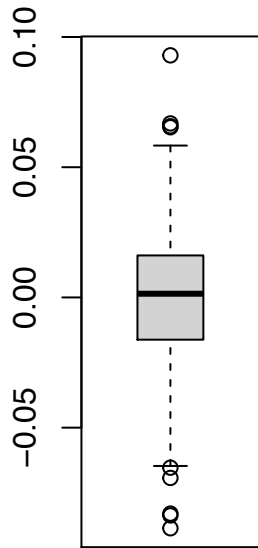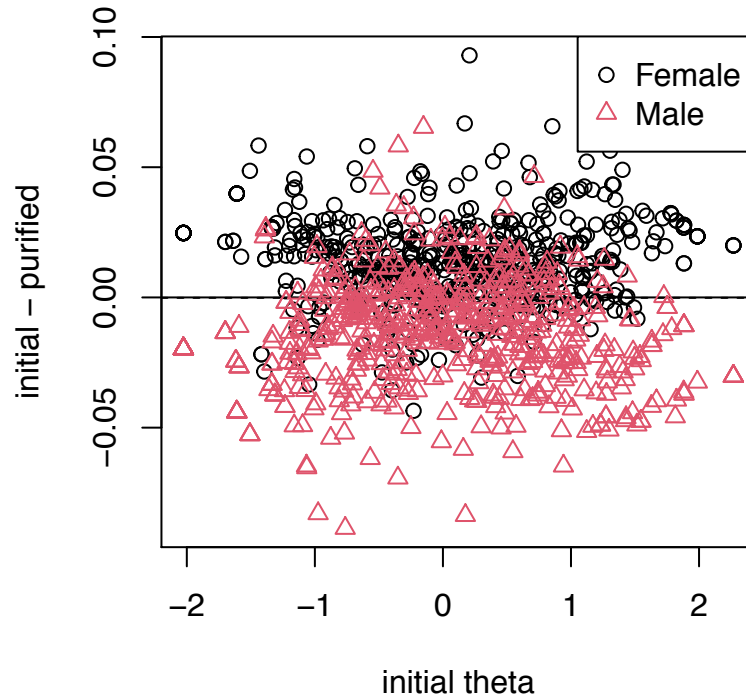

Back to top

## General Functioning

Site 1

### Reliability: General Functioning

```
## Cronbach's alpha is 0.562.
## Mean item-total correlation is 0.31.
## If each item were dropped:
##      raw_alpha std.alpha G6(smc) average_r S/N alpha se var.r med.r
## Q27      0.44      0.45      0.29      0.29 0.82  0.044  NA  0.29
## Q140      0.37      0.38      0.24      0.24 0.61  0.049  NA  0.24
## Q141      0.58      0.58      0.41      0.41 1.36  0.034  NA  0.41
```

## Scree Plot

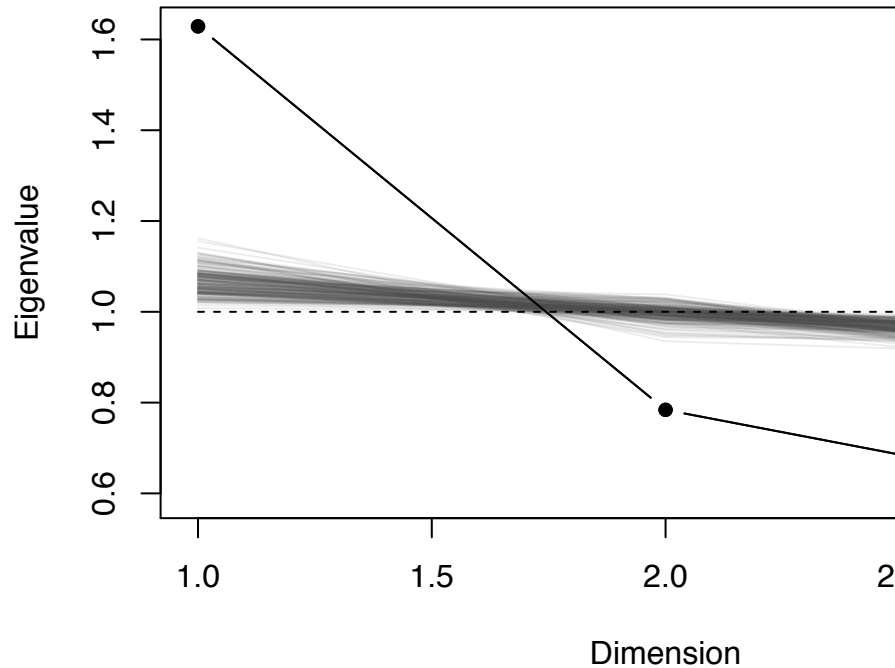

### Unidimensionality: General Functioning

```
## [1] "Ratio of first to second eigenvalues: 2.078"
```

```
## [1] 1.6288837 0.7840136 0.5871027
```

```
## Factor Analysis using method = minres
```

```
## Call: fa(r = grm_obj$X)
```

```
## Standardized loadings (pattern matrix) based upon correlation matrix
```

```
##      MR1  h2  u2 com
```

```
## Q27  0.57 0.33 0.67  1
```

```
## Q140 0.71 0.51 0.49  1
```

```
## Q141 0.41 0.17 0.83  1
```

```
##
```

```
##              MR1
```

```
## SS loadings  1.00
```

```
## Proportion Var 0.33
```

```
##
```

```
## Mean item complexity = 1
```

```
## Test of the hypothesis that 1 factor is sufficient.
```

```
##
```

```
## The degrees of freedom for the null model are 3 and the objective function was 0.29 with Chi Square
```

```
## The degrees of freedom for the model are 0 and the objective function was 0
```

```
##
```

```
## The root mean square of the residuals (RMSR) is 0
```

```
## The df corrected root mean square of the residuals is NA
```

```
##
```

```
## The harmonic number of observations is 575 with the empirical chi square 0 with prob < NA
```

```
## The total number of observations was 617 with Likelihood Chi Square = 0 with prob < NA
```

```
##
```

```
## Tucker Lewis Index of factoring reliability = -Inf
```

```
## Fit based upon off diagonal values = 1
```

```
## Measures of factor score adequacy
```

```

##
## Correlation of (regression) scores with factors    MR1
## Multiple R square of scores with factors          0.63
## Minimum correlation of possible factor scores     0.26

```

**Graded-Response Model: General Functioning**

|         | Extrmt1 | Extrmt2 | Extrmt3 | Extrmt4 | Extrmt5 | Extrmt6 | Dscrmm |
|---------|---------|---------|---------|---------|---------|---------|--------|
| ## Q27  | -2.877  | -2.249  | -1.441  | -0.541  | 0.313   | 1.495   | 1.396  |
| ## Q140 | -2.067  | -1.322  | -0.638  | 0.014   | 0.774   | 1.793   | 1.928  |
| ## Q141 | -3.260  | -2.348  | -1.573  | -0.998  | -0.140  | 0.909   | 0.772  |

**Test Information Function**

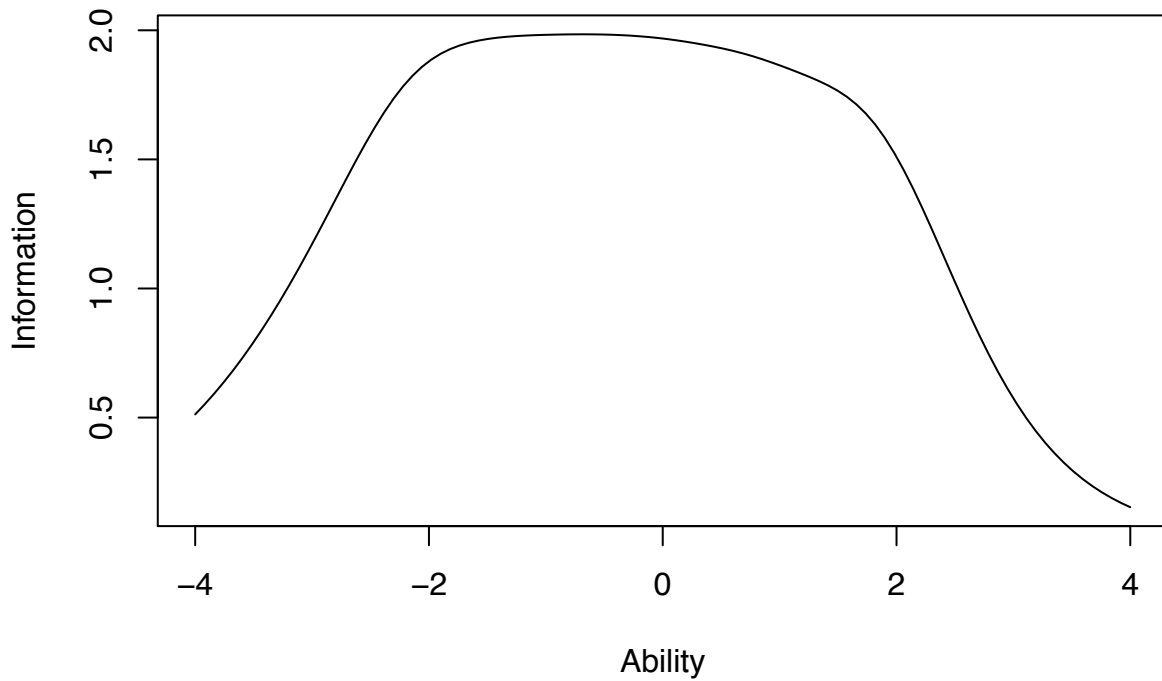

## Item Information Curves

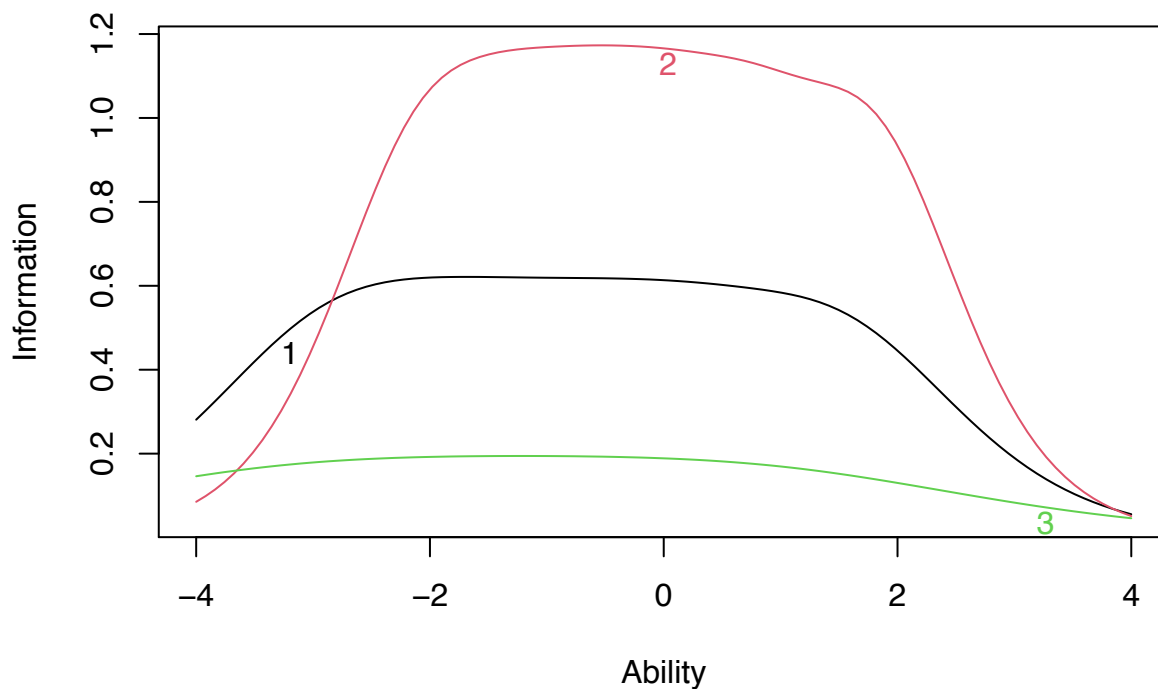

Back to top

### Site 2

#### Reliability: General Functioning

## Cronbach's alpha is 0.596.

## Mean item-total correlation is 0.338.

## If each item were dropped:

| ##      | raw_alpha | std.alpha | G6(smc) | average_r | S/N  | alpha | se | var.r | med.r |
|---------|-----------|-----------|---------|-----------|------|-------|----|-------|-------|
| ## Q27  | 0.41      | 0.41      | 0.26    | 0.26      | 0.71 | 0.047 | NA | 0.26  |       |
| ## Q140 | 0.48      | 0.48      | 0.32    | 0.32      | 0.94 | 0.042 | NA | 0.32  |       |
| ## Q141 | 0.60      | 0.60      | 0.43    | 0.43      | 1.52 | 0.032 | NA | 0.43  |       |



## Scree Plot

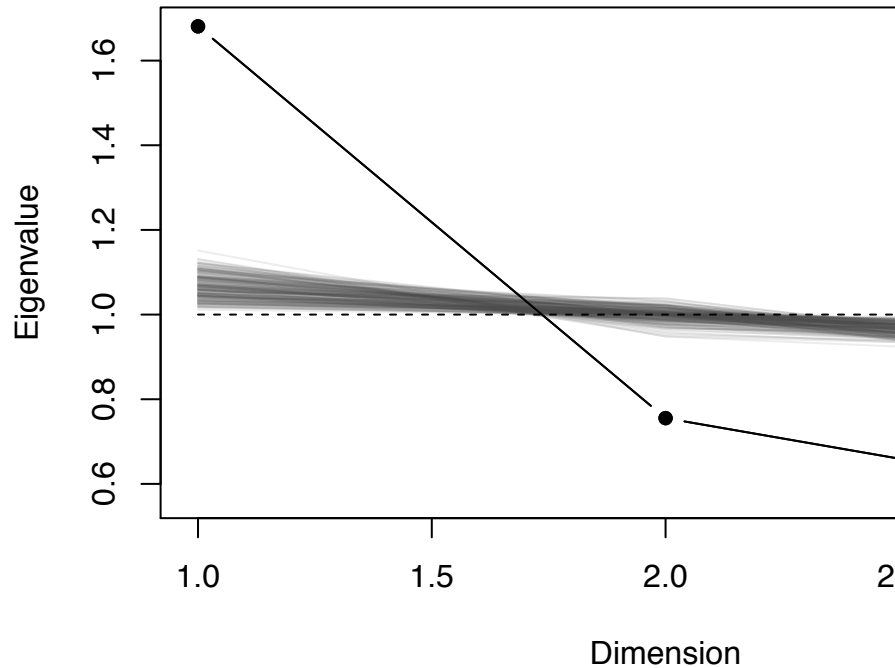

### Unidimensionality: General Functioning

## [1] "Ratio of first to second eigenvalues: 2.225"

## [1] 1.6809103 0.7553387 0.5637510

## Factor Analysis using method = minres

## Call: fa(r = grm\_obj\$X)

## Standardized loadings (pattern matrix) based upon correlation matrix

##       MR1   h2   u2   com

## Q27  0.72 0.52 0.48   1

## Q140 0.59 0.35 0.65   1

## Q141 0.44 0.20 0.80   1

##

##                   MR1

## SS loadings       1.07

## Proportion Var 0.36

##

## Mean item complexity = 1

## Test of the hypothesis that 1 factor is sufficient.

##

## The degrees of freedom for the null model are 3 and the objective function was 0.33 with Chi Square

## The degrees of freedom for the model are 0 and the objective function was 0

##

## The root mean square of the residuals (RMSR) is 0

## The df corrected root mean square of the residuals is NA

##

## The harmonic number of observations is 548 with the empirical chi square 0 with prob < NA

## The total number of observations was 596 with Likelihood Chi Square = 0 with prob < NA

##

## Tucker Lewis Index of factoring reliability = -Inf

## Fit based upon off diagonal values = 1

## Measures of factor score adequacy

```

##                                     MR1
## Correlation of (regression) scores with factors  0.81
## Multiple R square of scores with factors        0.65
## Minimum correlation of possible factor scores    0.31

```

**Graded-Response Model: General Functioning**

```

##      Extrmt1 Extrmt2 Extrmt3 Extrmt4 Extrmt5 Extrmt6 Dscrmm
## Q27  -1.684  -1.243  -0.599   0.101   0.728   1.640   1.933
## Q140 -1.953  -1.189  -0.387   0.317   1.161   2.296   1.503
## Q141 -2.124  -1.291  -0.639   0.087   0.912   1.693   0.953

```

**Test Information Function**

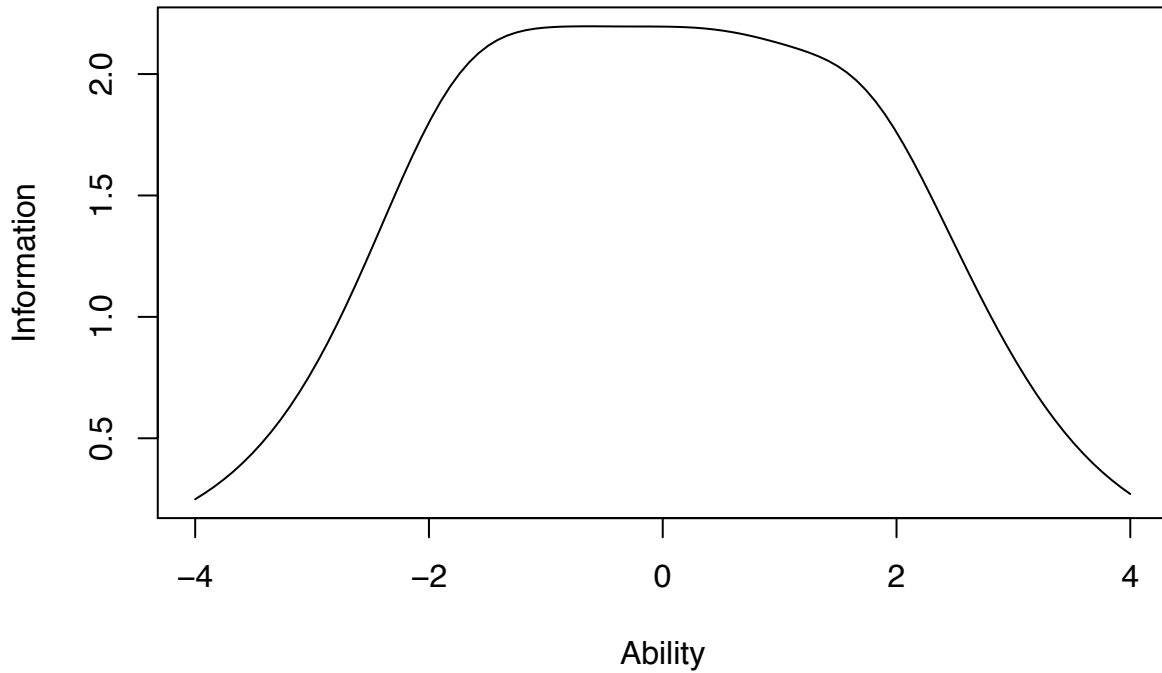

## Item Information Curves

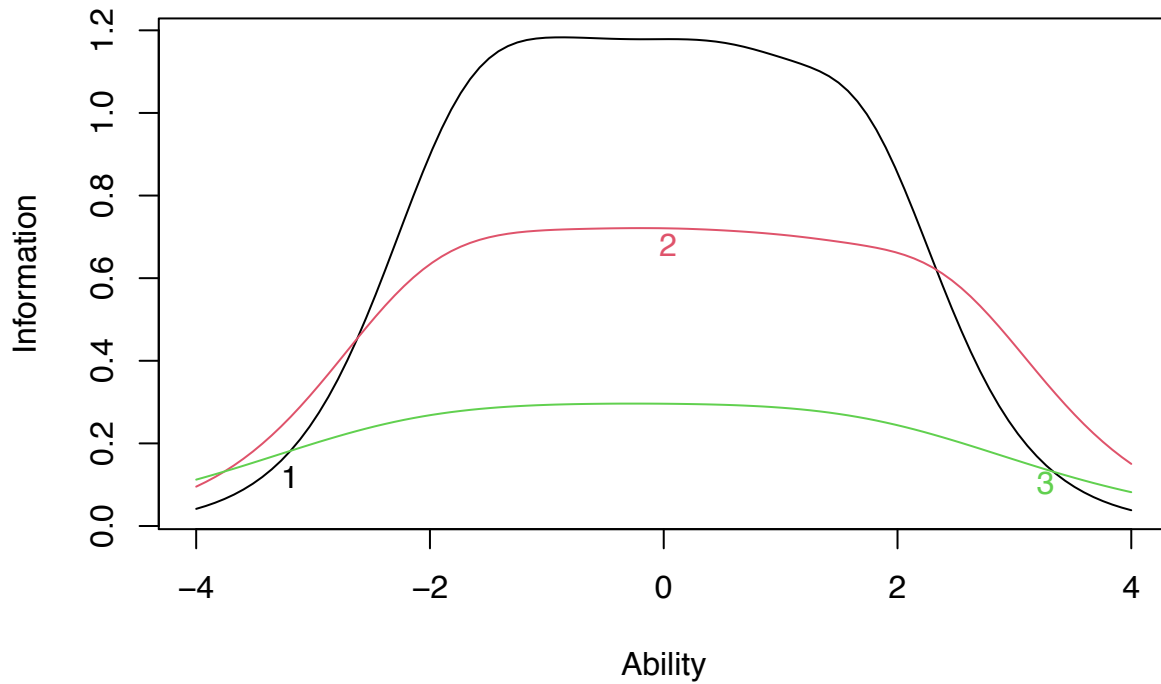

Back to top

### Gender-based DIF: General Functioning

## No Gender-based DIF detected

### Age-based DIF: General Functioning

## No age-based DIF detected

Back to top

## Substance Recovery

### Site 1

#### Reliability: Substance Recovery

## Cronbach's alpha is 0.503.

## Mean item-total correlation is 0.22.

## If each item were dropped:

| ##      | raw_alpha | std.alpha | G6(smc) | average_r | S/N  | alpha | se      | var.r | med.r |
|---------|-----------|-----------|---------|-----------|------|-------|---------|-------|-------|
| ## Q109 | 0.34      | 0.38      | 0.32    | 0.17      | 0.61 | 0.046 | 0.02251 | 0.14  |       |
| ## Q154 | 0.35      | 0.37      | 0.30    | 0.16      | 0.58 | 0.044 | 0.01800 | 0.15  |       |
| ## Q108 | 0.43      | 0.45      | 0.37    | 0.22      | 0.83 | 0.039 | 0.01512 | 0.15  |       |
| ## Q155 | 0.58      | 0.60      | 0.50    | 0.33      | 1.48 | 0.028 | 0.00078 | 0.33  |       |

## Scree Plot

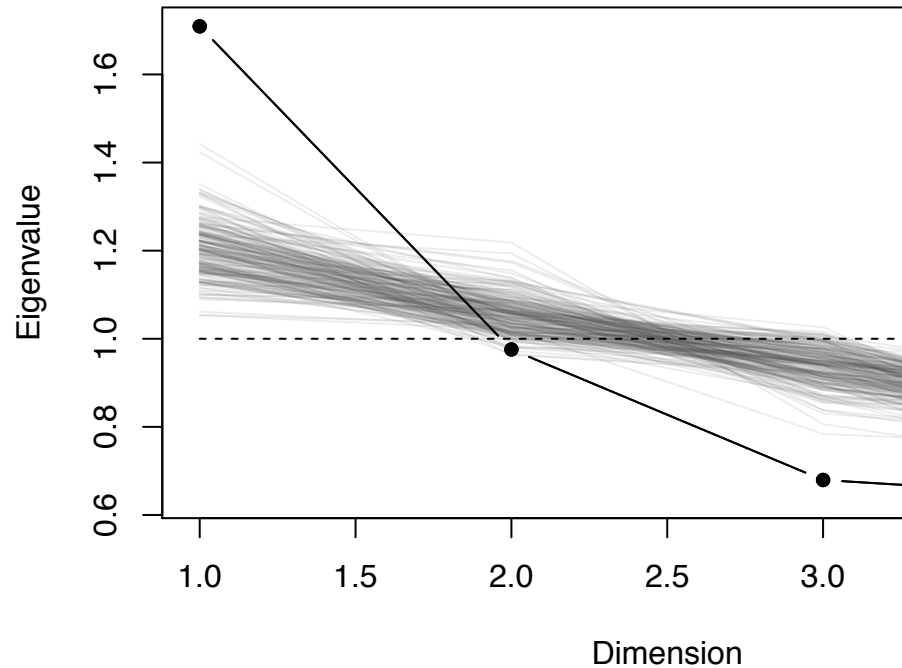

### Unidimensionality: Substance Recovery

```
## [1] "Ratio of first to second eigenvalues: 1.752"
## [1] 1.7091740 0.9757107 0.6794088 0.6357065
## Factor Analysis using method = minres
## Call: fa(r = grm_obj$X)
## Standardized loadings (pattern matrix) based upon correlation matrix
##      MR1    h2    u2 com
## Q109 0.61 0.368 0.63  1
## Q154 0.62 0.388 0.61  1
## Q108 0.49 0.240 0.76  1
## Q155 0.20 0.039 0.96  1
##
##              MR1
## SS loadings    1.04
## Proportion Var 0.26
##
## Mean item complexity = 1
## Test of the hypothesis that 1 factor is sufficient.
##
## The degrees of freedom for the null model are 6 and the objective function was 0.33 with Chi Square
## The degrees of freedom for the model are 2 and the objective function was 0.01
##
## The root mean square of the residuals (RMSR) is 0.03
## The df corrected root mean square of the residuals is 0.05
##
## The harmonic number of observations is 129 with the empirical chi square 1.35 with prob < 0.51
## The total number of observations was 617 with Likelihood Chi Square = 5.81 with prob < 0.055
##
## Tucker Lewis Index of factoring reliability = 0.941
## RMSEA index = 0.056 and the 90 % confidence intervals are 0 0.111
```

```

## BIC = -7.04
## Fit based upon off diagonal values = 0.99
## Measures of factor score adequacy
##
## Correlation of (regression) scores with factors      MR1
## Multiple R square of scores with factors            0.61
## Minimum correlation of possible factor scores       0.22

```

**Graded-Response Model: Substance Recovery**

| ##      | Extrmt1 | Extrmt2 | Extrmt3 | Extrmt4 | Extrmt5 | Extrmt6 | Dscrmn |
|---------|---------|---------|---------|---------|---------|---------|--------|
| ## Q109 | -0.560  | 0.515   | 1.032   | 1.451   | 1.827   | 2.743   | 1.149  |
| ## Q154 | 0.653   | 1.265   | 1.471   | 1.683   | 1.732   | 1.962   | 3.627  |
| ## Q108 | -0.298  | 0.952   | 1.774   | 2.772   | 3.164   | 3.793   | 1.187  |
| ## Q155 | -1.123  | 0.882   | 1.668   | 2.670   | 3.335   | 4.046   | 0.565  |

**Test Information Function**

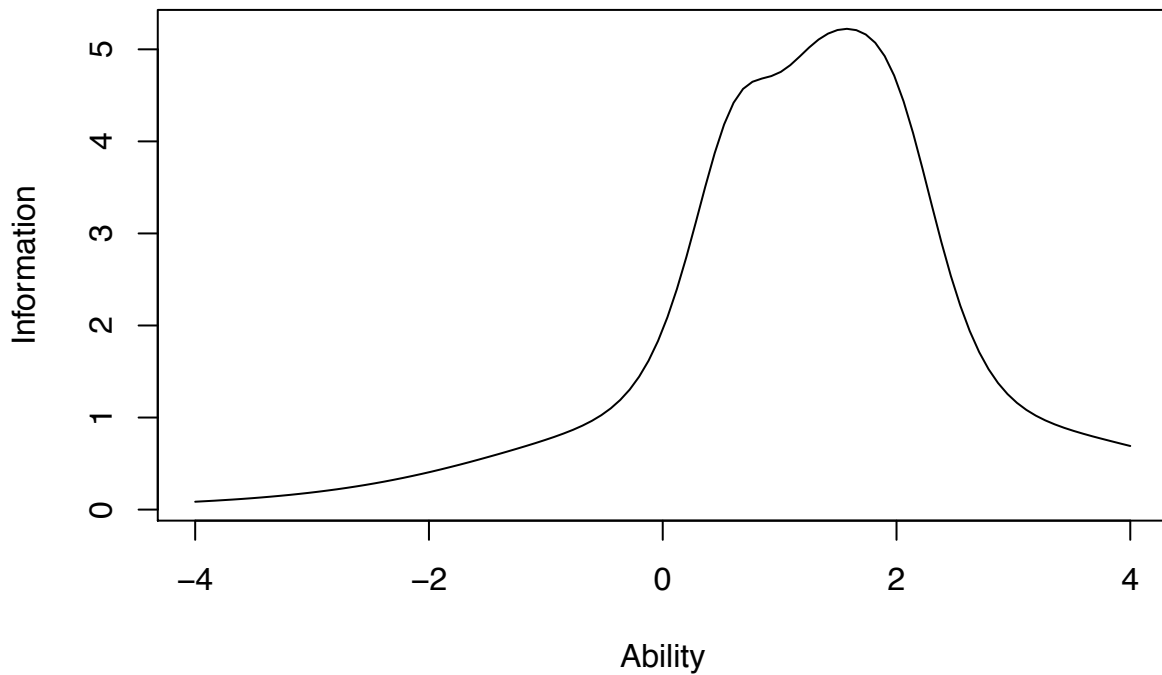

## Item Information Curves

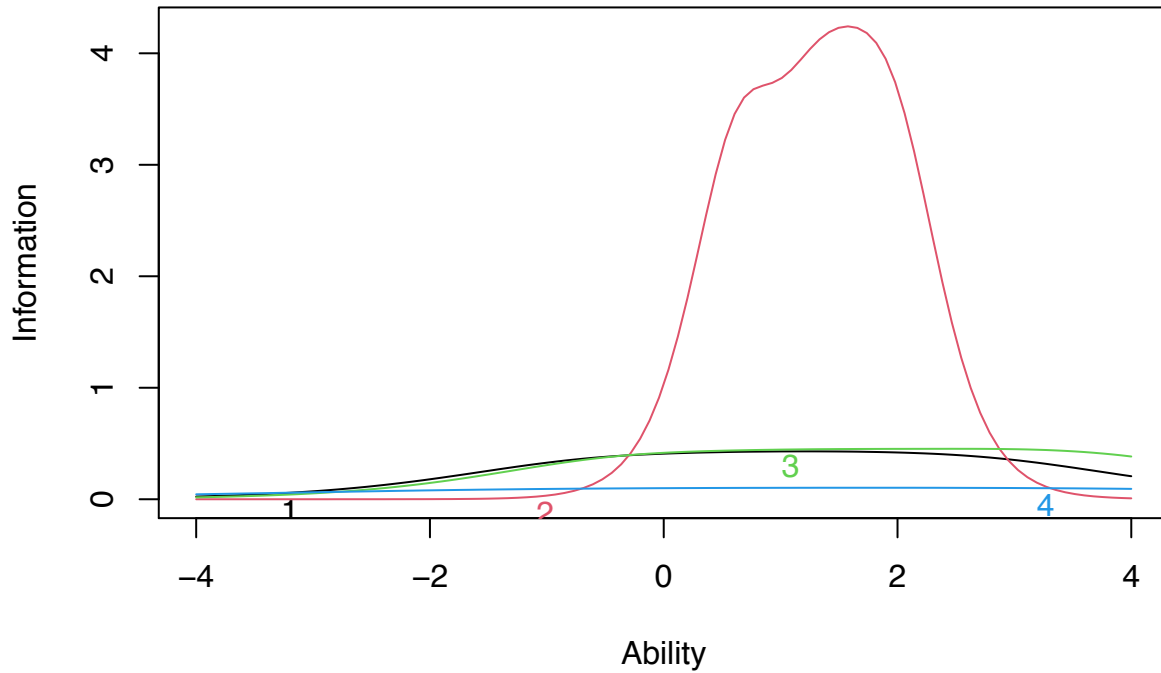

Back to top

### Site 2

Did not converge.

### Gender-based DIF: Substance Recovery

```
## Call:
## lordif::lordif(resp.data = as.data.frame(sex.data), group = sex)
##
##   Number of DIF groups: 2
##
##   Number of items flagged for DIF: 0 of 4
##
##   Items flagged:
##
##   Number of iterations for purification: 1 of 10
##
##   Detection criterion: Chisqr
##
##   Threshold: alpha = 0.01
```

### Age-based DIF: Substance Recovery

```
## Call:
## lordif::lordif(resp.data = as.data.frame(age.data), group = age)
```

```
##
## Number of DIF groups: 2
##
## Number of items flagged for DIF: 0 of 4
##
## Items flagged:
##
## Number of iterations for purification: 1 of 10
##
## Detection criterion: Chisqr
##
## Threshold: alpha = 0.01
```

Back to top

## Session Information

### Functions

Here is the code for the relevant custom functions created at the start of this analysis script. They are only reproduced here for presentation, not re-run here.

```
# Test information function
tif <- function(x){
  # x is a grm object
  plot(x, type = "IIC", items = 0, zrange = c(-4, 4), plot = TRUE)
}

# Item information curve
iic <- function(x){
  # x is a grm object
  plot(x, type = "IIC", zrange = c(-4, 4), plot = TRUE)
}

# IRT summary convenience function
irt_summary <- function(x){
  # x is a grm object from package `ltm`
  print(coef(x))
  tif(x)
  iic(x)
}

# Internal consistency convenience function
alpha_summary <- function(x){
  # x is an object from ltm::grm()
  if(class(x) != "grm"){
    warning("Not an object of type 'grm'.")
  }
  temp_alpha <- psych::alpha(x$X, check.keys = TRUE)
  alph <- temp_alpha$total$raw_alpha
  r_item_tot <- temp_alpha$total$average_r
  cat("Cronbach's alpha is ", round(alph, 3), ". \nMean item-total correlation is ",
      round(r_item_tot, 3), ".\nIf each item were dropped: \n", sep = "")
}
```

```

print(temp_alpha$alpha.drop, digits = 2)
invisible(temp_alpha)
# The function will always print the raw alpha and mean item-total correlation when run.
# If called as a saved object, however, it functions as the output of a call to psych::alpha.
}

# ROC curve convenience function
roc_summary <- function(x){
  # x is an roc object from {pROC}
  plot(x)
  auc(x)
}

# Unidimensionality: Scree plot with simulated random data sets

# This is the complete function scree.plot() from {psy} version 1.1 by Bruno Falissard.
# Bruno Falissard (2012). psy: Various procedures used in
# psychometry. R package version 1.1.
# https://CRAN.R-project.org/package=psy
# Borrowing it here so as not to require the package, with altered default values
# that include simulations and pairwise comparisons.
scree.plot2 <- function (namefile, title = "Scree Plot", type = "R", use = "P", simu = 200)
{
  mat <- namefile
  if (use == "complete.obs")
    mat <- na.omit(namefile)
  if (type == "R")
    eigenval <- eigen(cor(mat, use = "pairwise.complete.obs"),
                      symmetric = TRUE)$values
  if (type == "V")
    eigenval <- eigen(cov(mat, use = "pairwise.complete.obs"),
                      symmetric = TRUE)$values
  if (type == "E")
    eigenval <- namefile
  if (type == "M")
    eigenval <- eigen(namefile, symmetric = TRUE)$values
  nev <- length(eigenval)
  ### Added this code, using the eigenvalues later:
  eigenout <- eigenval
  ###
  plot(eigenval, type = "b", pch = 16, bty = "o", main = title,
       xlab = "Dimension", ylab = "Eigenvalue")
  # lines(c(1, nev), c(1, 1), lty = 2) # AAM moving this later
  if (is.numeric(simu) && (type == "R")) {
    n <- dim(mat)[1]
    p <- dim(mat)[2]
    matsimu <- matrix(nrow = n, ncol = p)
    int <- rep(1, n * p)
    attr(int, "dim") <- c(n, p)
    mat <- pmax(as.matrix(mat), int)
    for (i in 1:simu) {
      matnorm <- rnorm(n * p)
      attr(matnorm, "dim") <- c(n, p)
    }
  }
}

```



```

    matsimu <- (mat/mat) * matnorm
    eigenval <- eigen(cor(matsimu, use = "pairwise.complete.obs"))$values
    points(eigenval, type = "l", col = gray(.3, .1)) # AAM changed col value.
  }
}
lines(c(1, nev), c(1, 1), lty = 2) # AAM moved this here for visibility
points(eigenout, type = "b", pch = 16, bty = "o") # AAM added this as well.
### added this code:
print(paste0("Ratio of first to second eigenvalues: ",
            round((eigenout[1]/eigenout[2]), 3))
      eigenout
      ###
}

# lordif() printing function
# All this does is removes the Quartz viewer device from the existing lordif::plot.lordif() function.
# This is necessary to create the report that you are reading, the code changes
# do not alter the analysis from the existing lordif package function.
plot2.lordif <- function(x, labels = c("Reference", "Focal"), width = 7, height = 7,
                        ...)
{
  ndif <- sum(x$flag)
  if (ndif == 0)
    stop(paste(deparse(substitute(x))), " contains no items flagged for DIF")
  if (ndif == x$ni)
    stop("all items in ", paste(deparse(substitute(x))),
         " have been flagged for DIF")
  if (x$ng != length(labels))
    labels <- paste("Group", 1:x$ng)
  sumpp <- function(pp) {
    ws <- rowSums(pp * (col(pp) - 1))
    return(ws)
  }
  maxcat <- ncol(x$ipar.sparse)
  # Made into a comment by AAM
  # sysname <- Sys.info()[["sysname"]]
  # if (sysname == "Windows") {
  #   dev.new(width = width, height = height, record = TRUE)
  # }
  # else if (sysname == "Linux") {
  #   dev.new(width = width, height = height)
  #   par(ask = TRUE)
  # }
  # else {
  #   dev.new(width = width, height = height)
  # }
  par(mfrow = c(1, 1))
  theta <- seq(x$options$minTheta, x$options$maxTheta, x$options$inc)
  difitems <- (1:x$ni)[x$flag]
  difselections <- x$selection[x$flag]
  itemnames <- row.names(x$ipar.sparse)
  gpar <- array(NA, c(ndif, maxcat, x$ng))
  cpar <- as.matrix(x$ipar.sparse[1:(x$ni - ndif), ])

```

```

pp <- array(NA, c(length(theta), ndif, maxcat, x$ng))
gtheta <- split(x$calib.sparse$theta, x$group)
gdensity <- matrix(0, length(theta), x$ng)
for (i in 1:x$ng) {
  gdensity[, i] <- density(unlist(gtheta[names(table(x$group))[i]]),
    n = length(theta),
    from = x$options$minTheta,
    to = x$options$maxTheta,
    bw = 0.25)$y
}
plot(theta, gdensity[, 1], type = "l", xlab = "theta", ylab = "Density",
  ylim = c(0, max(gdensity)), lty = 1, col = 1, main = "Trait Distributions",
  ...)
for (g in 2:x$ng) {
  lines(theta, gdensity[, g], lty = g, col = g)
}
legend("topright", labels, lty = 1:x$ng, col = 1:x$ng, bg = "white")
par(mfrow = c(2, 2))
for (i in 1:length(difitems)) {
  ncat <- x$ncat[difitems[i]]
  plot(theta, seq(0, ncat - 1, along.with = theta), type = "n",
    xlab = "theta", ylab = "Item Score",
    main = paste0("Item True Score Functions - Item ",
      difselections[i]), ...)
  for (g in 1:x$ng) {
    gpar[i, , g] <- unlist(x$ipar.sparse[which(itemnames ==
      paste0("I",
        difselections[i],
        ".", g)), ])

    if (x$options$model == "GPCM")
      pp[, i, 1:ncat, g] <- lordif::probGPCM(theta, gpar[i,
        1, g], gpar[i, 2:ncat, g])
    else pp[, i, 1:ncat, g] <- lordif::probGRM(theta, gpar[i,
      1, g], gpar[i, 2:ncat, g])
    lines(theta, sumpp(pp[, i, 1:ncat, g]), lty = g,
      col = g)
  }
  legend("bottomright", labels, lty = 1:x$ng, col = 1:x$ng,
    cex = 0.7, bg = "white")
  chi12 <- paste(x$stats[difitems[i], "df12"], "=" , x$stats[difitems[i],
    "chi12"], sep = "")
  pseudo12 <- x$stats[difitems[i], paste("pseudo12.", x$options$pseudo.R2,
    sep = "")]
  beta12 <- round(x$stats[difitems[i], "beta12"], 4)
  chi13 <- paste(x$stats[difitems[i], "df13"], "=" , x$stats[difitems[i],
    "chi13"], sep = "")
  pseudo13 <- x$stats[difitems[i], paste("pseudo13.", x$options$pseudo.R2,
    sep = "")]
  chi23 <- paste(x$stats[difitems[i], "df23"], "=" , x$stats[difitems[i],
    "chi23"], sep = "")
  pseudo23 <- x$stats[difitems[i], paste("pseudo23.", x$options$pseudo.R2,
    sep = "")]
  text(min(theta), ncat - 1, substitute(paste("Pr(", chi[12]^2,

```

```

",", chi12, ",", R[12]^2, "=",
pseudo12, ",", Delta,
"(", beta[1], ")=", beta12,
sep = "")), adj = c(0,
1), cex = 0.8)
text(min(theta), (ncat - 1) * 0.9,
substitute(paste("Pr(",
chi[13]^2, ",", chi13, ",", R[13]^2, "=", pseudo13,
sep = ""))), adj = c(0, 1), cex = 0.8)
text(min(theta), (ncat - 1) * 0.8,
substitute(paste("Pr(",
chi[23]^2, ",", chi23, ",", R[23]^2, "=", pseudo23,
sep = ""))), adj = c(0, 1), cex = 0.8)
plot(theta, seq(0, ncat - 1, along.with = theta), type = "n",
xlab = "theta", ylab = "Item Score", main = "Differences in Item True Score Functions",
...)
for (g in 2:x$ng) {
lines(theta, abs(sumpp(pp[, i, 1:ncat, 1]) - sumpp(pp[,
i, 1:ncat, g])), lty = g, col = g)
}
plot(theta, seq(0, 1, along.with = theta), type = "n",
xlab = "theta", ylab = "Probability", main = "Item Response Functions",
...)
for (g in 1:x$ng) {
for (k in 1:ncat) {
lines(theta, pp[, i, k, g], lty = g, cex = 0.1,
col = g)
}
}
for (g in 1:x$ng) {
text(x$options$minTheta, 0.8 - (g - 1) * par()$cxy[2],
paste(round(gpar[i, , g][!is.na(gpar[i, , g])],
2), collapse = ", "), col = g, adj = c(0, 0),
cex = 0.8)
for (k in 2:ncat) {
if (!is.na(gpar[i, k, g]))
text(gpar[i, k, g], 0, "|", col = g)
}
}
plot(theta, seq(0, ncat - 1, along.with = theta), type = "n",
xlab = "theta", ylab = "Size", main = "Impact (Weighted by Density)",
...)
for (g in 2:x$ng) {
lines(theta, gdensity[, g] * abs(sumpp(pp[, i, 1:ncat,
1]) - sumpp(pp[, i, 1:ncat, g])),
lty = g, col = g)
}
}
par(mfrow = c(1, 2))
plot(theta, seq(0, sum(!is.na(x$ipar)) - x$ni, along = theta),
xlab = "theta", ylab = "TCC", type = "n", main = "All Items",
...)
for (g in 1:x$ng) {

```

```

    apar <- rbind(cpar, gpar[, , g])
    lines(theta, lordif::tcc(apar[, 1], apar[, -1, drop = F], theta,
                           model = x$options$model), lty = g, col = g)
  }
  legend("bottomright", labels, lty = 1:x$ng, col = 1:x$ng,
        bg = "white")
  plot(theta, seq(0, sum(!is.na(gpar[, , 1])) - ndif, along = theta),
        xlab = "theta", ylab = "TCC", type = "n", main = "DIF Items",
        ...)
  for (g in 1:x$ng) {
    lines(theta, lordif::tcc(gpar[, 1, g], matrix(gpar[, -1, g],
                                                  nrow = ndif), theta, model = x$options$model),
          lty = g,
          col = g)
  }
  legend("bottomright", labels, lty = 1:x$ng, col = 1:x$ng,
        bg = "white")
  layout(matrix(c(1, 2), ncol = 2), widths = c(1, 2))
  boxplot(x$calib$theta - x$calib.sparse$theta, col = "light grey")
  difference <- x$calib$theta - x$calib.sparse$theta
  plot(x$calib$theta, difference, type = "n", xlab = "initial theta",
       ylab = "initial - purified", ...)
  abline(h = 0)
  abline(h = mean(x$calib$theta - x$calib.sparse$theta), lty = 2)
  for (i in 1:x$ng) {
    points(x$calib$theta[x$group == as.numeric(names(table(x$group)))[i]],
           difference[x$group == as.numeric(names(table(x$group)))[i]],
           col = i, pch = i)
  }
  legend("topright", labels, pch = 1:x$ng, col = 1:x$ng, bg = "white")

  # Need to reset the layout so that future plots don't also have the same layout.
  layout(matrix(1)) # Added by AAM, 5/13/19
}

# making function to reverse score the integers
rev_score <- function(x){
  x * -1 + 8
}

# this interactively reverse codes items prior to scale analysis, only used for data
# combination reasons.
# More specifically, {mirt} and {ltm} have slightly different rules for automatically
# reverse-scoring items with negative correlations, which results in variable appearances for
# IRT parameters. Also, the different data collection and storage required across the samples
# in the study had different procedures for reverse scoring.
# The goal for this function is to standardize that reverse scoring across samples and analysis
# packages, so that it will reverse score any items that *should* be reverse scored based on
# empirical results.
# takes a tibble, returns one.
reverse_onfly <- function(data){
  x <- cor(data)
  while(any(x < -.1)){ # are there any negative cells in the correlation matrix?

```

```

# Assumes full data, no NA.
# Do this over and over again until it's not true:
indices <- which(cor(data) < -.1, arr.ind = TRUE)
# Note: allows for some small negative correlations, which would be very bad item combinations
name_quo <- rownames(indices)[1]
print(paste("name_quo ", name_quo))
name_use <- as.name(name_quo)
print(paste("name_use", name_use))
data <- mutate(data, !!name_use := rev_score(!!name_use))
x <- cor(data)
}
data # returns the data frame.
}

```

## Session Info

```

## R version 4.0.2 (2020-06-22)
## Platform: x86_64-apple-darwin17.0 (64-bit)
## Running under: macOS Mojave 10.14.6
##
## Matrix products: default
## BLAS: /Library/Frameworks/R.framework/Versions/4.0/Resources/lib/libRblas.dylib
## LAPACK: /Library/Frameworks/R.framework/Versions/4.0/Resources/lib/libRlapack.dylib
##
## locale:
## [1] en_US.UTF-8/en_US.UTF-8/en_US.UTF-8/C/en_US.UTF-8/en_US.UTF-8
##
## attached base packages:
## [1] stats4 stats graphics grDevices utils datasets methods
## [8] base
##
## other attached packages:
## [1] forcats_0.5.0 stringr_1.4.0 purrr_0.3.4 readr_1.4.0
## [5] tidyr_1.1.2 tibble_3.0.4 tidyverse_1.3.0 NORSEpkg_0.1.0
## [9] dplyr_1.0.2 lordif_0.3-3 rms_6.0-1 SparseM_1.78
## [13] Hmisc_4.4-1 ggplot2_3.3.2 Formula_1.2-4 survival_3.2-7
## [17] mirt_1.33.2 lattice_0.20-41 pROC_1.16.2 psych_2.0.9
## [21] ltm_1.1-1 polycor_0.7-10 msm_1.6.8 MASS_7.3-53
## [25] rmarkdown_2.4 knitr_1.30
##
## loaded via a namespace (and not attached):
## [1] TH.data_1.0-10 colorspace_1.4-1 ellipsis_0.3.1
## [4] htmlTable_2.1.0 base64enc_0.1-3 fs_1.5.0
## [7] rstudioapi_0.11 Deriv_4.1.1 MatrixModels_0.4-1
## [10] fansi_0.4.1 mvtnorm_1.1-1 lubridate_1.7.9
## [13] xml2_1.3.2 codetools_0.2-16 splines_4.0.2
## [16] mnormt_2.0.2 jsonlite_1.7.1 broom_0.7.1
## [19] cluster_2.1.0 dbplyr_1.4.4 png_0.1-7
## [22] compiler_4.0.2 httr_1.4.2 backports_1.1.10
## [25] assertthat_0.2.1 Matrix_1.2-18 cli_2.1.0
## [28] htmltools_0.5.0 quantreg_5.73 tools_4.0.2
## [31] gtable_0.3.0 glue_1.4.2 Rcpp_1.0.5
## [34] cellranger_1.1.0 vctrs_0.3.4 nlme_3.1-149

```

```

## [37] conquer_1.0.2      xfun_0.18          rvest_0.3.6
## [40] lifecycle_0.2.0    dcurver_0.9.2     polspline_1.1.19
## [43] zoo_1.8-8          scales_1.1.1      hms_0.5.3
## [46] parallel_4.0.2     sandwich_3.0-0    expm_0.999-5
## [49] RColorBrewer_1.1-2 yaml_2.2.1        gridExtra_2.3
## [52] rpart_4.1-15       latticeExtra_0.6-29 stringi_1.5.3
## [55] checkmate_2.0.0    permute_0.9-5     rlang_0.4.8
## [58] pkgconfig_2.0.3    matrixStats_0.57.0 evaluate_0.14
## [61] htmlwidgets_1.5.2 tidyselect_1.1.0  plyr_1.8.6
## [64] magrittr_1.5       R6_2.4.1          generics_0.0.2
## [67] multcomp_1.4-14    DBI_1.1.0         pillar_1.4.6
## [70] haven_2.3.1        foreign_0.8-80    withr_2.3.0
## [73] mgcv_1.8-33        nnet_7.3-14       modelr_0.1.8
## [76] crayon_1.3.4       tmvnsim_1.0-2     jpeg_0.1-8.1
## [79] grid_4.0.2         readxl_1.3.1      data.table_1.13.0
## [82] blob_1.2.1         vegan_2.5-6       reprex_0.3.0
## [85] digest_0.6.25      GPArotation_2014.11-1 munsell_0.5.0

```
